# Supplementary material
Source: PubMed Central journal article supplement (PMC8633318)
Supplement: 41431_2021_849_MOESM1_ESM.pdf [file 41431_2021_849_MOESM1_ESM.pdf]

## **Supplementary information**

Supplemental Methods: PDF, Recruitment of cases and controls and quality parameters.

Supplemental Table S1: PDF, Overview of genes analyzed in the study and motivation for inclusion.

Supplemental Table S2: PDF, Characteristics of study population.

Supplemental Table S3: PDF, Reference sequences.

Supplemental Table S4: PDF, Results from the gene-based tests, at MAF cutoffs 1% and 0.1%.

Supplemental Table S4bis: PDF, Results from the gene-based tests, at MAF cutoffs 0.1%, sorted by significance.

Supplemental Table S4ter: PDF, Results from the gene-based tests, at MAF cutoffs 1%, sorted by significance.

Supplemental Table S5: PDF, Identified variants in COL5A1 with MAF<1% in the control population.

Supplemental Table S6: PDF, Identified variants in COL2A1 with MAF<0.1% in the control population.

Supplemental Table S7: PDF, Identified nonsynonymous variants in TNXB with MAF<0.1% in the control population.

Supplemental Table S8: PDF, Identified variants in ZNF469 with MAF<0.1% in the control population.

Supplemental Figure S1: PDF, Average base coverage for the target region for case and control samples.

Supplemental Figure S2: PDF, Predictions of the effect on splicing of the three variants located in the exon-intron boundaries and ranking in the top-15 of single SNP association tests.

Supplemental Figure S3: PDF, Coverage of the MIP probe targeting the reported SOD1 c.169+50delTAAACAG variant for all samples.

Supplemental Figure S4: PDF, Histograms of the variants passing and failing the criterion (20 or 30% call rate).

Supplementary Report 1: PDF, overview of all isoforms studied.

Supplementary Report 2: PDF, graphical overview of the performance of each MIP.

Supplementary Report 3: PDF, list of the MIPs not reaching quality criteria.

## Supplementary methods

### Recruitment of cases and controls

Keratoconus cases were recruited during regular clinical practice at the three hospitals mentioned in the manuscript. Keratoconus diagnosis was based on slit-lamp biomicroscopy and videokeratographic evaluation by using the OPD-Scan ARK-10000 (NIDEK, Tokyo, Japan) and ALLEGRO Oculyzer (WAVELIGHT AG, Erlangen, Germany).

Each recruiting center collected a number of controls approximately equal to the number of cases recruited. Controls were not screened for the absence of KC, but this is not necessary due to the low prevalence of KC in the general population. Moskvina et al. have shown that for diseases with a population prevalence in the order of a few percent, including unscreened controls is a cost-effective strategy with little effect on the power.<sup>1</sup> At the prevalence reported by Godefrooij et al.<sup>2</sup>, in the order of 1/375, there might be a few KC cases included in the controls, but the effect on the power is negligible.

### Quality parameters

Initially, 787 patients and 856 ethnically matched controls were included in this study. Based upon **Supplemental Figure S1**, samples not reaching 100x average base coverage across the target region were excluded from the analysis, thus excluding 88 samples from the population (42 cases and 46 controls), resulting in 745 cases and 810 controls.

Quality parameters for including samples and variants, detected using NGS, were fine-tuned by comparing the NGS results – subject to varying quality parameter cutoffs – to Sanger sequencing results, whereby this latter technique was considered to be the gold standard.

Sanger sequencing was carried out in 34 different samples, across different regions of the area targeted by the MIPs. Per sample, between 10 and 409 genomic positions were covered by the Sanger sequencing, adding up to a total of 4013 genomic positions. Starting from these 4013 genomic positions, covered both by the Sanger sequencing and the NGS, the quality parameters for NGS were fine-tuned in a stepwise

way, using the positive predictive value (PPV) as key metric. This value tells the fraction of observed variants (through NGS) that is truly present (according to the Sanger sequencings as gold standard). In other words, if a variant is observed through NGS, we wanted to maximize the probability that this variant is real – which is equivalent to reducing the number of false positives. In addition, we calculated the negative predicted value (NPV), which describes what fraction of the homozygous wild type alleles (according to NGS) is truly homozygous wild type. This is also an indication on the number of false negatives.

**Criterion 1:** Samples reaching at least 100x average base coverage across the target region

|               |            | NGS result |            | Total |
|---------------|------------|------------|------------|-------|
|               |            | R/R        | R/A or A/A |       |
| Sanger result | R/R        | 3879       | 83         | 3962  |
|               | R/A or A/A | 15         | 36         | 51    |
| Total         |            | 3894       | 119        | 4013  |

$$PPV = 36/119 = 0.302$$

$$NPV = 3879/3894 = 0.996$$

**Criterion 2:** Criterion 1 + adjusted cutoffs for genotype calling based upon fraction of the alternative allele:

- Alternative allelic fraction below 20% : variant is called homozygous reference
- Alternative allelic fraction between 20% and 80% : variant is called heterozygous
- Alternative allelic fraction above 80% : variant is called homozygous alternative

|               |            | NGS result |            |       |
|---------------|------------|------------|------------|-------|
|               |            | R/R        | R/A or A/A | Total |
| Sanger result | R/R        | 3928       | 32         | 3962  |
|               | R/A or A/A | 20         | 33         | 51    |
| Total         |            | 3948       | 65         | 4013  |

$$PPV = 33/65 = 0.507$$

$$NPV = 3928/3948 = 0.996$$

**Criterion 3:** Criterion 2 + excluding positions with depth below 50

|               |            | NGS result |            |       |
|---------------|------------|------------|------------|-------|
|               |            | R/R        | R/A or A/A | Total |
| Sanger result | R/R        | 2460       | 9          | 2469  |
|               | R/A or A/A | 4          | 33         | 37    |
| Total         |            | 2464       | 42         | 2506  |

$$PPV = 33/42 = 0.785$$

$$NPV = 2460/2464 = 0.998$$

**Criterion 4:** criterion 3 + excluding variants with a quality by depth below 8

|               |            | NGS result |            |       |
|---------------|------------|------------|------------|-------|
|               |            | R/R        | R/A or A/A | Total |
| Sanger result | R/R        | 239        | 1          | 240   |
|               | R/A or A/A | 2          | 33         | 35    |
| Total         |            | 241        | 34         | 275   |

$$PPV = 33/34 = 0.971$$

$$NPV = 239/241 = 0.992$$

Under the quality parameters from criterion 4, if a variant detected by NGS has a 97.1% probability of representing a true signal. Only variants for which a genotype was called in 333 samples (or 20% of samples) were included.



## References

1. Moskvina V, Holmans P, Schmidt KM, Craddock N. Design of case-controls studies with unscreened controls. *Ann Hum Genet* 2005;69(Pt 5):566-76.
2. Godefrooij DA, de Wit GA, Uiterwaal CS, et al. Age-specific Incidence and Prevalence of Keratoconus: A Nationwide Registration Study. *Am J Ophthalmol* 2017;175:169-72.

## Supplementary figure legends:

**Supplemental figure S1.** Average base coverage for the target region for case and control samples.

**Supplemental figure S2.** Predictions of the effect on splicing of the three variants located in the exon-intron boundaries and ranking in the top-15 of single SNP association tests.

**Supplemental figure S3.** Coverage of the MIP probe targeting the reported SOD1 c.169+50\_169+56del variant for all included samples.

**Supplemental figure S4.** Histograms of variants passing and failing the criterion.

**Supplemental table S1.** Overview of genes analyzed in the study and motivation for inclusion.

| Gene           | Full name                                            | Chr. | Motivation for inclusion                                                                                                                   |
|----------------|------------------------------------------------------|------|--------------------------------------------------------------------------------------------------------------------------------------------|
| <i>COL12A1</i> | Collagen type XII alpha 1 chain                      | 6    | WES                                                                                                                                        |
| <i>COL2A1</i>  | Collagen type II alpha 1 chain                       | 12   | WES                                                                                                                                        |
| <i>COL5A1</i>  | Collagen type V alpha 1 chain                        | 9    | Literature: associated with CCT <sup>1</sup> , causes EDS <sup>2</sup> , haploinsufficiency leads to thinner corneas <sup>3</sup>          |
| <i>COL5A3</i>  | Collagen type V alpha 3 chain                        | 19   | WES                                                                                                                                        |
| <i>DCAF11</i>  | DDB1 and CUL4 associated factor 11                   | 14   | WES                                                                                                                                        |
| <i>DOCK1</i>   | Dedicator of cytokinesis 1                           | 10   | WES                                                                                                                                        |
| <i>DOCK9</i>   | Dedicator of cytokinesis 9                           | 13   | Literature: in linked KC locus and variant causes exon skipping <sup>4,5</sup>                                                             |
| <i>EPPK1</i>   | Epiplakin 1                                          | 8    | WES                                                                                                                                        |
| <i>FASLG</i>   | Fas ligand                                           | 1    | WES                                                                                                                                        |
| <i>FNDC3B</i>  | Fibronectin type III domain containing 3B            | 3    | Literature: associated with CCT <sup>1</sup>                                                                                               |
| <i>FOXO1</i>   | Forkhead box O1                                      | 13   | Literature: associated with CCT <sup>1</sup>                                                                                               |
| <i>HLA-G</i>   | Major histocompatibility complex, class I, G         | 6    | Literature: expressed in the cornea <sup>6</sup>                                                                                           |
| <i>IL1RN</i>   | Interleukin 1 receptor antagonist                    | 2    | Literature: potential disease-causing mutation in KC family <sup>7</sup>                                                                   |
| <i>LAMC3</i>   | Laminin subunit gamma 3                              | 9    | WES                                                                                                                                        |
| <i>LCA5</i>    | Lebercilin                                           | 6    | WES                                                                                                                                        |
| <i>P3H4</i>    | Prolyl 3-hydroxylase family member 4 (non-enzymatic) | 17   | WES                                                                                                                                        |
| <i>LOX</i>     | Lysyl oxidase                                        | 5    | Literature: associated with KC <sup>8</sup>                                                                                                |
| <i>LOXHD1</i>  | Lipoxygenase homology domains 1                      | 18   | WES                                                                                                                                        |
| <i>miR184</i>  | MicroRNA 184                                         | 15   | Literature: mutations cause a spectrum of corneal abnormalities, including KC <sup>9-12</sup>                                              |
| <i>MMP9</i>    | Matrix metalloproteinase 9                           | 20   | Literature: increased expression in KC <sup>13</sup>                                                                                       |
| <i>NLRP1</i>   | NLR family pyrin domain containing 1                 | 17   | WES                                                                                                                                        |
| <i>PARP1</i>   | Poly(ADP-ribose) polymerase 1                        | 1    | WES                                                                                                                                        |
| <i>PARP2</i>   | Poly(ADP-ribose) polymerase 2                        | 14   | WES                                                                                                                                        |
| <i>PRPH2</i>   | Peripherin 2                                         | 6    | WES                                                                                                                                        |
| <i>RDH13</i>   | Retinol dehydrogenase 13                             | 19   | WES                                                                                                                                        |
| <i>SLC4A11</i> | Solute carrier family 4 member 11                    | 20   | Literature: potential disease-causing mutation in KC family <sup>7</sup>                                                                   |
| <i>SOD1</i>    | Superoxide dismutase 1                               | 21   | Literature: potential disease-causing mutation <sup>14</sup>                                                                               |
| <i>TF</i>      | Transferrin                                          | 3    | WES                                                                                                                                        |
| <i>TGFBI</i>   | Transforming growth factor beta induced              | 5    | Literature: potential disease-causing mutation in KC <sup>15</sup>                                                                         |
| <i>TNXB</i>    | TENASCIN XB                                          | 6    | WES                                                                                                                                        |
| <i>VSX1</i>    | Visual system homeobox 1                             | 20   | Literature: potential disease-causing mutation in KC <sup>16</sup>                                                                         |
| <i>WNT10A</i>  | Wnt family member 10A                                | 2    | Literature: risk factor for KC <sup>17</sup>                                                                                               |
| <i>ZEB1</i>    | Zinc finger E-box binding homeobox 1                 | 10   | WES + literature: potential disease-causing mutations in KC <sup>18</sup>                                                                  |
| <i>ZNF469</i>  | Zinc finger protein 469                              | 16   | WES + literature: causes BCS <sup>19</sup> , associated with CCT <sup>1</sup> , potential disease-causing mutations in KC <sup>20-23</sup> |

Chr = chromosome; WES = Whole Exome Sequencing; CCT = Central Corneal Thickness; EDS = Ehlers Danlos Syndrome; KC = Keratoconus; BCS = Brittle Cornea Syndrome.

### **Motivation for inclusion**

Candidate genes labeled as WES were selected based upon a previous whole exome sequencing study on twenty-two families segregating KC (unpublished results). We selected the candidate genes known to be expressed in the cornea, in which we found a variant that segregated – at least partially – with the KC phenotype, and that could possibly affect protein function. We used the following criteria, some of which were different between families with an autosomal dominant (AD) or autosomal recessive (AR) inheritance pattern :

- variants had to be shared across all affected patients from one family and had to be absent in the unaffected family member,
- MAF cutoffs for the rare allele were 0.0007 (for AD families) and  $MAF < 0.05$  (for AR families), according to dbSNP v142, in ESP6500, the 1000 Genomes 2012 release and ExAC version 3,
- synonymous variants (according to RefSeq) were excluded,
- variants had to be located in exons or in regions affecting splicing (including noncoding RNAs),
- in the AR families, the alternative allele had to be present in homozygous state, in heterozygous state for the AD families.

References:

1. Lu Y, Vitart V, Burdon KP *et al*: Genome-wide association analyses identify multiple loci associated with central corneal thickness and keratoconus. *Nature genetics* 2013; **45**: 155-163.
2. Toriello HV, Glover TW, Takahara K *et al*: A translocation interrupts the COL5A1 gene in a patient with Ehlers-Danlos syndrome and hypomelanosis of Ito. *Nature genetics* 1996; **13**: 361-365.
3. Segev F, Heon E, Cole WG *et al*: Structural abnormalities of the cornea and lid resulting from collagen V mutations. *Investigative ophthalmology & visual science* 2006; **47**: 565-573.
4. Czugala M, Karolak JA, Nowak DM *et al*: Novel mutation and three other sequence variants segregating with phenotype at keratoconus 13q32 susceptibility locus. *European journal of human genetics : EJHG* 2012; **20**: 389-397.
5. Karolak JA, Rydzanicz M, Ginter-Matuszewska B *et al*: Variant c.2262A>C in DOCK9 Leads to Exon Skipping in Keratoconus Family. *Investigative ophthalmology & visual science* 2015; **56**: 7687-7690.
6. Le Discorde M, Moreau P, Sabatier P, Legeais JM, Carosella ED: Expression of HLA-G in human cornea, an immune-privileged tissue. *Hum Immunol* 2003; **64**: 1039-1044.
7. Nowak DM, Karolak JA, Kubiak J *et al*: Substitution at IL1RN and deletion at SLC4A11 segregating with phenotype in familial keratoconus. *Investigative ophthalmology & visual science* 2013; **54**: 2207-2215.
8. Bykhovskaya Y, Li X, Epifantseva I *et al*: Variation in the lysyl oxidase (LOX) gene is associated with keratoconus in family-based and case-control studies. *Investigative ophthalmology & visual science* 2012; **53**: 4152-4157.
9. Lechner J, Bae HA, Guduric-Fuchs J *et al*: Mutational analysis of MIR184 in sporadic keratoconus and myopia. *Investigative ophthalmology & visual science* 2013; **54**: 5266-5272.
10. Hughes AE, Bradley DT, Campbell M *et al*: Mutation altering the miR-184 seed region causes familial keratoconus with cataract. *American journal of human genetics* 2011; **89**: 628-633.
11. Iliff BW, Riazuddin SA, Gottsch JD: Documenting the corneal phenotype associated with the MIR184 c.57C>T mutation. *American journal of human genetics* 2012; **90**: 934; author reply 934-935.

12. Bykhovskaya Y, Caiado Canedo AL, Wright KW, Rabinowitz YS: C.57 C > T Mutation in MIR 184 is Responsible for Congenital Cataracts and Corneal Abnormalities in a Five-generation Family from Galicia, Spain. *Ophthalmic genetics* 2015; **36**: 244-247.
13. Shetty R, Sathyanarayanamoorthy A, Ramachandra RA *et al*: Attenuation of lysyl oxidase and collagen gene expression in keratoconus patient corneal epithelium corresponds to disease severity. *Molecular vision* 2015; **21**: 12-25.
14. Udar N, Atilano SR, Brown DJ *et al*: SOD1: a candidate gene for keratoconus. *Investigative ophthalmology & visual science* 2006; **47**: 3345-3351.
15. Guan T, Liu C, Ma Z, Ding S: The point mutation and polymorphism in keratoconus candidate gene TGFB1 in Chinese population. *Gene* 2012; **503**: 137-139.
16. Heon E, Greenberg A, Kopp KK *et al*: VSX1: a gene for posterior polymorphous dystrophy and keratoconus. *Human molecular genetics* 2002; **11**: 1029-1036.
17. Cuellar-Partida G, Springelkamp H, Lucas SE *et al*: WNT10A exonic variant increases the risk of keratoconus by decreasing corneal thickness. *Human molecular genetics* 2015; **24**: 5060-5068.
18. Lechner J, Dash DP, Muszynska D *et al*: Mutational spectrum of the ZEB1 gene in corneal dystrophies supports a genotype-phenotype correlation. *Investigative ophthalmology & visual science* 2013; **54**: 3215-3223.
19. Rohrbach M, Spencer HL, Porter LF *et al*: ZNF469 frequently mutated in the brittle cornea syndrome (BCS) is a single exon gene possibly regulating the expression of several extracellular matrix components. *Molecular genetics and metabolism* 2013; **109**: 289-295.
20. Lechner J, Porter LF, Rice A *et al*: Enrichment of pathogenic alleles in the brittle cornea gene, ZNF469, in keratoconus. *Human molecular genetics* 2014; **23**: 5527-5535.
21. Vincent AL, Jordan CA, Cadzow MJ, Merriman TR, McGhee CN: Mutations in the zinc finger protein gene, ZNF469, contribute to the pathogenesis of keratoconus. *Investigative ophthalmology & visual science* 2014; **55**: 5629-5635.
22. Yu X, Chen B, Zhang X, Shentu X: Identification of seven novel ZNF469 mutations in keratoconus patients in a Han Chinese population. *Molecular vision* 2017; **23**: 296-305.
23. Yildiz E, Bardak H, Gunay M *et al*: Novel Zinc Finger Protein Gene 469 (ZNF469) Variants in Advanced Keratoconus. *Current eye research* 2017; **42**: 1396-1400.

**Supplemental table S2.** Study population.

|                            |                | <b>Patients</b> |               |                | <b>Total</b> | <b>Controls</b> |               |                | <b>Total</b> |
|----------------------------|----------------|-----------------|---------------|----------------|--------------|-----------------|---------------|----------------|--------------|
|                            |                | <b>Belgian</b>  | <b>French</b> | <b>Italian</b> |              | <b>Belgian</b>  | <b>French</b> | <b>Italian</b> |              |
| <b>Total per ethnicity</b> |                | 251             | 268           | 226            | <b>745</b>   | 295             | 292           | 223            | <b>810</b>   |
| <b>Gender</b>              | <b>Male</b>    | 180             | 157           | 141            | <b>478</b>   | 129             | 109           | 98             | <b>336</b>   |
|                            | <b>Female</b>  | 71              | 99            | 85             | <b>255</b>   | 166             | 174           | 124            | <b>464</b>   |
|                            | <b>Unknown</b> | 0               | 12            | 0              | <b>12</b>    | 0               | 9             | 1              | <b>10</b>    |

**Supplemental table S3.** Overview of exact reference sequences. Hg19 was used as reference genome.

| <b>Gene</b>    | <b>Reference sequence</b> |
|----------------|---------------------------|
| <i>COL12A1</i> | NC_000006.11              |
| <i>COL2A1</i>  | NC_000012.11              |
| <i>COL5A1</i>  | NC_000012.11              |
| <i>COL5A3</i>  | NC_000019.9               |
| <i>DCAF11</i>  | NC_000014.8               |
| <i>DOCK1</i>   | NC_000010.10              |
| <i>DOCK9</i>   | NC_000013.10              |
| <i>EPPK1</i>   | NC_000008.10              |
| <i>FASLG</i>   | NC_000008.10              |
| <i>FNDC3B</i>  | NC_000003.11              |
| <i>FOXO1</i>   | NC_000013.10              |
| <i>HLA-G</i>   | NC_000006.11              |
| <i>IL1RN</i>   | NC_000002.11              |
| <i>LAMC3</i>   | NC_000009.11              |
| <i>LCA5</i>    | NC_000006.11              |
| <i>LOX</i>     | NC_000005.9               |
| <i>LOXHD1</i>  | NC_000018.9               |
| <i>miR184</i>  | NC_000015.9               |
| <i>MMP9</i>    | NC_000020.10              |
| <i>NLRP1</i>   | NC_000017.10              |
| <i>P3H4</i>    | NC_000017.10              |
| <i>PARP1</i>   | NC_000001.10              |
| <i>PARP2</i>   | NC_000014.8               |
| <i>PRPH2</i>   | NC_000006.11              |
| <i>RDH13</i>   | NC_000019.9               |
| <i>SLC4A11</i> | NC_000020.10              |
| <i>SOD1</i>    | NC_000021.8               |
| <i>TF</i>      | NC_000003.11              |
| <i>TGFBI</i>   | NC_000005.9               |
| <i>TNXB</i>    | NC_000006.11              |
| <i>VSX1</i>    | NC_000020.10              |
| <i>WNT10A</i>  | NC_000002.11              |
| <i>ZEB1</i>    | NC_000010.10              |
| <i>ZNF469</i>  | NC_000016.9               |





|        |                       |        |        |        |        |        |        |        |        |        |        |    |
|--------|-----------------------|--------|--------|--------|--------|--------|--------|--------|--------|--------|--------|----|
|        | 5'UTR                 | NA     | NA |
|        | 3'UTR                 | NA     | NA |
| HLA-G  | Frameshift/nonsense   | NA     | NA |
|        | nonsynonymous/inframe | 0.6127 | 0.2331 | 0.1668 | NA     | 0.5724 | NA     | 0.1270 | 0.1270 | 0.1219 | NA     | NA |
|        | synonymous            | 1.0000 | 1.0000 | 0.3357 | NA     | 0.7083 | NA     | 0.7939 | 0.7939 | 0.9101 | NA     | NA |
|        | intronic              | 0.4276 | 0.4348 | 0.3616 | 0.1209 | 0.1838 | 0.3267 | 0.0310 | 0.1191 | 0.0636 | 0.5524 | NA |
|        | 5'UTR                 | NA     | NA |
|        | 3'UTR                 | NA     | NA |
| IL1RN  | Frameshift/nonsense   | NA     | NA |
|        | nonsynonymous/inframe | 0.1058 | 0.1631 | 0.0690 | 0.0922 | 0.0680 | 0.0582 | 0.4036 | 0.7924 | 0.1628 | 0.1209 | NA |
|        | synonymous            | 0.0962 | 0.0525 | 0.0386 | 0.0254 | 0.0404 | 0.0244 | 0.2586 | 0.0238 | 0.2228 | 0.0540 | NA |
|        | intronic              | 0.2701 | 0.2701 | 0.0992 | 0.1038 | 0.0888 | 0.0888 | 0.1150 | 0.1150 | 0.1858 | 0.2068 | NA |
|        | 5'UTR                 | 0.4750 | NA     | NA     | NA     | NA     | NA     | 0.1843 | NA     | NA     | NA     | NA |
|        | 3'UTR                 | NA     |    |
| LAMC3  | Frameshift/nonsense   | NA     | NA |
|        | nonsynonymous/inframe | 0.6167 | 0.2261 | 0.4406 | 0.1459 | 0.1868 | 0.1598 | 1.0000 | 0.9123 | 0.9960 | 0.7213 | NA |
|        | synonymous            | 1.0000 | 0.1858 | 0.4775 | 0.0916 | 0.6573 | 0.1259 | 0.3978 | 0.1419 | 0.6693 | 0.4206 | NA |
|        | intronic              | 0.7601 | 0.1714 | 0.3766 | 0.0846 | 0.5514 | 0.1309 | 0.4942 | 0.3837 | 0.6144 | 0.4426 | NA |
|        | 5'UTR                 | NA     | NA |
|        | 3'UTR                 | NA     |    |
| LCA5   | Frameshift/nonsense   | NA     | NA |
|        | nonsynonymous/inframe | 0.1058 | 0.1058 | 0.0288 | 0.0338 | 0.0422 | 0.0382 | 0.0253 | 0.0253 | 0.1938 | 0.1938 | NA |
|        | synonymous            | 1.0000 | 1.0000 | 0.5914 | 0.6334 | 0.4735 | 0.4765 | 0.7707 | 0.7707 | 0.7393 | 0.7463 | NA |
|        | intronic              | 0.0674 | 1.0000 | 0.7722 | 0.6074 | 0.7862 | 0.5974 | 0.0229 | 0.5559 | 0.0286 | 0.8591 | NA |
|        | 5'UTR                 | NA     | NA |
|        | 3'UTR                 | 1.0000 | 1.0000 | NA     | NA     | NA     | NA     | 0.7984 | 0.7984 | NA     | NA     | NA |
| LOX    | Frameshift/nonsense   | 1.0000 | 1.0000 | NA     | NA     | NA     | NA     | 0.5755 | 0.5755 | NA     | NA     | NA |
|        | nonsynonymous/inframe | 0.1636 | 0.1636 | 0.0500 | 0.0548 | 0.0770 | 0.0738 | 0.7398 | 0.7398 | 0.1174 | 0.1249 | NA |
|        | synonymous            | 0.6258 | 0.6258 | 0.7912 | 0.7902 | 0.7732 | 0.7542 | 0.8931 | 0.8931 | 0.5025 | 0.5075 | NA |
|        | intronic              | 1.0000 | 1.0000 | 0.6893 | 0.6773 | 0.6833 | 0.6873 | 0.6628 | 0.6628 | 0.9031 | 0.9171 | NA |
|        | 5'UTR                 | 0.6257 | 0.6257 | 0.7473 | 0.7582 | 0.7942 | 0.7892 | 0.7749 | 0.7749 | 0.4995 | 0.5115 | NA |
|        | 3'UTR                 | 0.5006 | 0.5006 | 0.8801 | 0.8561 | 0.8801 | 0.8661 | 0.8754 | 0.8754 | 0.3836 | 0.3516 | NA |
| LOXHD1 | Frameshift/nonsense   | 0.7447 | 0.6751 | 0.4266 | 0.3197 | 0.4006 | 0.2897 | 0.7738 | 0.3183 | 0.8162 | 0.5135 | NA |
|        | nonsynonymous/inframe | 0.8002 | 0.2399 | 0.7343 | 0.1146 | 0.3526 | 0.1968 | 0.8336 | 0.6360 | 0.6953 | 0.4206 | NA |
|        | synonymous            | 0.9196 | 0.1040 | 0.5135 | 0.0614 | 0.2927 | 0.0746 | 0.5914 | 0.3967 | 0.6853 | 0.5155 | NA |
|        | intronic              | 0.5959 | 0.4796 | 0.7762 | 0.2687 | 0.8182 | 0.3776 | 0.9728 | 0.7452 | 0.9950 | 0.9421 | NA |
|        | 5'UTR                 | 0.6239 | NA     | NA     | NA     | NA     | NA     | 0.3940 | NA     | NA     | NA     | NA |
|        | 3'UTR                 | NA     |    |
| miR184 | ncRNA_exonic          | NA     | NA |
|        | ncRNA_upstream        | 0.2330 | 0.2330 | NA     | NA     | NA     | NA     | 0.1268 | 0.1268 | NA     | NA     | NA |
|        | ncRNA_downstream      | NA     | NA |
| MMP9   | Frameshift/nonsense   | NA     | NA |
|        | nonsynonymous/inframe | 1.0000 | 0.0954 | 0.3127 | 0.0386 | 0.6394 | 0.0654 | 0.8086 | 0.7965 | 0.2797 | 0.0908 | NA |
|        | synonymous            | 0.3549 | 0.3549 | 0.1359 | 0.1374 | 0.1798 | 0.1838 | 0.0520 | 0.0520 | 0.2557 | 0.2567 | NA |
|        | intronic              | 0.0067 | 0.0312 | 0.0014 | 0.0046 | 0.0110 | 0.0240 | 0.1082 | 0.0285 | 0.0762 | 0.0082 | NA |
|        | 5'UTR                 | NA     | NA |
|        | 3'UTR                 | NA     |    |
| NLRP1  | Frameshift/nonsense   | 0.4844 | 0.4844 | NA     | NA     | NA     | NA     | 0.2094 | 0.2094 | NA     | NA     | NA |
|        | nonsynonymous/inframe | 0.6183 | 0.6604 | 0.8771 | 0.5205 | 0.7872 | 0.4885 | 0.8444 | 0.8629 | 0.6054 | 0.6873 | NA |
|        | synonymous            | 0.7219 | 0.8084 | 0.7103 | 0.3756 | 0.8551 | 0.4525 | 0.4648 | 0.0633 | 0.3836 | 0.1389 | NA |
|        | intronic              | 0.8752 | 0.8182 | 0.7393 | 0.4326 | 0.6184 | 0.3696 | 1.0000 | 0.8925 | 0.9910 | 0.9311 | NA |
|        | 5'UTR                 | NA     | NA |
|        | 3'UTR                 | 0.4348 | 0.4348 | 0.1289 | 0.1269 | 0.5355 | 0.5335 | 0.1241 | 0.1241 | 0.1548 | 0.1528 | NA |
| P3H4   | Frameshift/nonsense   | NA     | NA |
|        | nonsynonymous/inframe | 0.5100 | 1.0000 | 0.7972 | 0.5964 | 0.7223 | 0.4496 | 0.7686 | 0.7686 | 0.4326 | 0.8521 | NA |
|        | synonymous            | 0.0870 | 0.0598 | 0.0684 | 0.0396 | 0.0250 | 0.0156 | 0.3392 | 0.7765 | 0.2048 | 0.0270 | NA |
|        | intronic              | 0.4910 | 0.3541 | 0.2488 | 0.1578 | 0.1948 | 0.1668 | 0.7006 | 0.4300 | 0.6763 | 0.3866 | NA |
|        | 5'UTR                 | NA     | NA |
|        | 3'UTR                 | NA     |    |
| PARP1  | Frameshift/nonsense   | 0.2508 | 0.2508 | 0.9361 | 0.9481 | 0.9311 | 0.9231 | 0.9000 | 0.9000 | 0.1568 | 0.1638 | NA |
|        | nonsynonymous/inframe | 1.0000 | 0.2930 | 0.5115 | 0.1459 | 0.2897 | 0.1249 | 0.7133 | 0.8892 | 0.5674 | 0.2028 | NA |
|        | synonymous            | 0.0591 | 0.5838 | 0.8881 | 0.7742 | 0.8941 | 0.7792 | 0.0712 | 0.8664 | 0.0448 | 0.1153 | NA |
|        | intronic              | 1.0000 | 0.4580 | 0.4206 | 0.2418 | 0.6723 | 0.3676 | 0.1804 | 0.2769 | 0.3596 | 0.5335 | NA |
|        | 5'UTR                 | NA     | NA |
|        | 3'UTR                 | NA     |    |
| PARP2  | Frameshift/nonsense   | NA     | NA |
|        | nonsynonymous/inframe | 0.1997 | 0.0350 | 0.0430 | 0.0072 | 0.2737 | 0.0294 | 0.0241 | 0.0043 | 0.1678 | 0.1234 | NA |
|        | synonymous            | 0.0962 | 0.0962 | 0.0538 | 0.0514 | 0.0350 | 0.0442 | 0.6529 | 0.6529 | 0.1014 | 0.0888 | NA |



|       |    |    |    |    |    |    |    |    |    |    |    |
|-------|----|----|----|----|----|----|----|----|----|----|----|
| 5'UTR | NA |
| 3'UTR | NA |

MAF = Minor Allele Frequency; Vt = Variable Thresholds methods; kbac = kernel-based adaptive cluster; CMC = Combined and Multivariate collapsing; skat = SNP-set (Sequence) Kernel Association Method; EDS = Ehlers-Danlos Syndrome.

Cells in bold and with box borders: q-value below 0.05 upon FDR analysis. Hg19 was used as reference genome.

**Supplementary table S4bis:** Results from the gene-based tests, at MAF cutoffs 0.1% , sorted by significance

| <b>Gene</b>    | <b>p-value</b> | <b>q-value</b> | <b>Test</b> | <b>Variant category</b>                    | <b>EDS gene</b> |
|----------------|----------------|----------------|-------------|--------------------------------------------|-----------------|
| <i>COL2A1</i>  | 2.00E-04       | 0.0318         | kbac        | Intronic variants                          | non-EDS gene    |
| <i>TNXB</i>    | 3.00E-04       | 0.0318         | CMC         | Nonsynonymous variants and in-frame indels | EDS gene        |
| <i>TNXB</i>    | 4.00E-04       | 0.0318         | kbac        | Nonsynonymous variants and in-frame indels | EDS gene        |
| <i>ZNF469</i>  | 4.00E-04       | 0.0318         | kbac        | Nonsynonymous variants and in-frame indels | EDS gene        |
| <i>TNXB</i>    | 5.00E-04       | 0.0318         | skat        | Nonsynonymous variants and in-frame indels | EDS gene        |
| <i>ZNF469</i>  | 6.00E-04       | 0.0318         | kbac        | Synonymous variants                        | EDS gene        |
| <i>TNXB</i>    | 6.00E-04       | 0.0318         | vt          | Nonsynonymous variants and in-frame indels | EDS gene        |
| <i>ZNF469</i>  | 6.00E-04       | 0.0318         | vt          | Nonsynonymous variants and in-frame indels | EDS gene        |
| <i>COL5A1</i>  | 6.00E-04       | 0.0318         | skat        | Synonymous variants                        | EDS gene        |
| <i>COL2A1</i>  | 0.001          | 0.0446         | vt          | Intronic variants                          | non-EDS gene    |
| <i>COL2A1</i>  | 0.0013         | 0.0516         | CMC         | Intronic variants                          | non-EDS gene    |
| <i>ZNF469</i>  | 0.0019         | 0.0714         | CMC         | Nonsynonymous variants and in-frame indels | EDS gene        |
| <i>ZNF469</i>  | 0.003          | 0.1004         | vt          | Synonymous variants                        | EDS gene        |
| <i>ZNF469</i>  | 0.0032         | 0.1004         | CMC         | Synonymous variants                        | EDS gene        |
| <i>PARP2</i>   | 0.0043         | 0.1268         | skat        | Nonsynonymous variants and in-frame indels | non-EDS gene    |
| <i>MMP9</i>    | 0.0046         | 0.1282         | kbac        | Intronic variants                          | non-EDS gene    |
| <i>TF</i>      | 0.0056         | 0.1365         | kbac        | Synonymous variants                        | non-EDS gene    |
| <i>TF</i>      | 0.0058         | 0.1365         | vt          | Synonymous variants                        | non-EDS gene    |
| <i>COL5A1</i>  | 0.0058         | 0.1365         | skat        | Intronic variants                          | EDS gene        |
| <i>COL12A1</i> | 0.0062         | 0.1382         | vt          | Intronic variants                          | EDS gene        |
| <i>COL12A1</i> | 0.0067         | 0.1396         | skat        | Synonymous variants                        | EDS gene        |
| <i>PARP2</i>   | 0.0072         | 0.1396         | kbac        | Nonsynonymous variants and in-frame indels | non-EDS gene    |
| <i>COL5A1</i>  | 0.0072         | 0.1396         | kbac        | Synonymous variants                        | EDS gene        |
| <i>COL5A1</i>  | 0.0078         | 0.1449         | kbac        | Intronic variants                          | EDS gene        |
| <i>MMP9</i>    | 0.0082         | 0.1462         | calpha      | Intronic variants                          | non-EDS gene    |
| <i>FNDC3B</i>  | 0.0098         | 0.1624         | kbac        | Nonsynonymous variants and in-frame indels | non-EDS gene    |
| <i>TF</i>      | 0.0099         | 0.1624         | CMC         | Synonymous variants                        | non-EDS gene    |
| <i>COL5A1</i>  | 0.0102         | 0.1624         | vt          | Intronic variants                          | EDS gene        |

|                |        |        |        |                                            |              |
|----------------|--------|--------|--------|--------------------------------------------|--------------|
| <i>COL12A1</i> | 0.0106 | 0.163  | kbac   | Intronic variants                          | EDS gene     |
| <i>FNDC3B</i>  | 0.0117 | 0.1739 | skat   | Nonsynonymous variants and in-frame indels | non-EDS gene |
| <i>ZNF469</i>  | 0.0124 | 0.178  | skat   | Nonsynonymous variants and in-frame indels | EDS gene     |
| <i>DOCK1</i>   | 0.0149 | 0.1921 | skat   | Intronic variants                          | non-EDS gene |
| <i>COL12A1</i> | 0.0155 | 0.1921 | CMC    | Intronic variants                          | EDS gene     |
| <i>COL12A1</i> | 0.0156 | 0.1921 | vt     | Synonymous variants                        | EDS gene     |
| <i>P3H4</i>    | 0.0156 | 0.1921 | vt     | Synonymous variants                        | non-EDS gene |
| <i>RDH13</i>   | 0.0159 | 0.1921 | skat   | Intronic variants                          | non-EDS gene |
| <i>COL12A1</i> | 0.0162 | 0.1921 | kbac   | Synonymous variants                        | EDS gene     |
| <i>COL5A1</i>  | 0.0168 | 0.1921 | vt     | Synonymous variants                        | EDS gene     |
| <i>COL5A1</i>  | 0.0168 | 0.1921 | CMC    | Intronic variants                          | EDS gene     |
| <i>FNDC3B</i>  | 0.0204 | 0.224  | kbac   | Intronic variants                          | non-EDS gene |
| <i>COL5A1</i>  | 0.0235 | 0.224  | CMC    | Synonymous variants                        | EDS gene     |
| <i>IL1RN</i>   | 0.0238 | 0.224  | skat   | Synonymous variants                        | non-EDS gene |
| <i>FNDC3B</i>  | 0.024  | 0.224  | kbac   | Synonymous variants                        | non-EDS gene |
| <i>MMP9</i>    | 0.024  | 0.224  | vt     | Intronic variants                          | non-EDS gene |
| <i>IL1RN</i>   | 0.0244 | 0.224  | vt     | Synonymous variants                        | non-EDS gene |
| <i>LCA5</i>    | 0.0253 | 0.224  | skat   | Nonsynonymous variants and in-frame indels | non-EDS gene |
| <i>IL1RN</i>   | 0.0254 | 0.224  | kbac   | Synonymous variants                        | non-EDS gene |
| <i>COL5A1</i>  | 0.026  | 0.224  | calpha | Synonymous variants                        | EDS gene     |
| <i>VSX1</i>    | 0.0264 | 0.224  | kbac   | Intronic variants                          | non-EDS gene |
| <i>P3H4</i>    | 0.027  | 0.224  | calpha | Synonymous variants                        | non-EDS gene |
| <i>VSX1</i>    | 0.0274 | 0.224  | vt     | Intronic variants                          | non-EDS gene |
| <i>VSX1</i>    | 0.0276 | 0.224  | calpha | Intronic variants                          | non-EDS gene |
| <i>DOCK1</i>   | 0.0276 | 0.224  | vt     | Intronic variants                          | non-EDS gene |
| <i>FNDC3B</i>  | 0.0278 | 0.224  | vt     | Nonsynonymous variants and in-frame indels | non-EDS gene |
| <i>FNDC3B</i>  | 0.0284 | 0.224  | skat   | Intronic variants                          | non-EDS gene |
| <i>MMP9</i>    | 0.0285 | 0.224  | skat   | Intronic variants                          | non-EDS gene |
| <i>ZEB1</i>    | 0.0286 | 0.224  | skat   | Synonymous variants                        | non-EDS gene |
| <i>PARP2</i>   | 0.0294 | 0.226  | vt     | Nonsynonymous variants and in-frame indels | non-EDS gene |

|                |        |        |        |                                            |              |
|----------------|--------|--------|--------|--------------------------------------------|--------------|
| <i>ZEB1</i>    | 0.031  | 0.2318 | kbac   | Intronic variants                          | non-EDS gene |
| <i>MMP9</i>    | 0.0312 | 0.2318 | CMC    | Intronic variants                          | non-EDS gene |
| <i>SOD1</i>    | 0.0334 | 0.2392 | calpha | 5' UTR variants                            | non-EDS gene |
| <i>RDH13</i>   | 0.0334 | 0.2392 | kbac   | Intronic variants                          | non-EDS gene |
| <i>LCA5</i>    | 0.0338 | 0.2392 | kbac   | Nonsynonymous variants and in-frame indels | non-EDS gene |
| <i>PARP2</i>   | 0.035  | 0.2441 | CMC    | Nonsynonymous variants and in-frame indels | non-EDS gene |
| <i>COL2A1</i>  | 0.0368 | 0.2486 | calpha | Intronic variants                          | non-EDS gene |
| <i>ZNF469</i>  | 0.0368 | 0.2486 | calpha | Synonymous variants                        | EDS gene     |
| <i>LCA5</i>    | 0.0382 | 0.2494 | vt     | Nonsynonymous variants and in-frame indels | non-EDS gene |
| <i>TF</i>      | 0.0382 | 0.2494 | skat   | Synonymous variants                        | non-EDS gene |
| <i>MMP9</i>    | 0.0386 | 0.2494 | kbac   | Nonsynonymous variants and in-frame indels | non-EDS gene |
| <i>P3H4</i>    | 0.0396 | 0.2522 | kbac   | Synonymous variants                        | non-EDS gene |
| <i>SLC4A11</i> | 0.0426 | 0.2606 | kbac   | Synonymous variants                        | non-EDS gene |
| <i>TNXB</i>    | 0.0435 | 0.2606 | skat   | Synonymous variants                        | EDS gene     |
| <i>PARP2</i>   | 0.0442 | 0.2606 | vt     | Synonymous variants                        | non-EDS gene |
| <i>RDH13</i>   | 0.0446 | 0.2606 | skat   | Synonymous variants                        | non-EDS gene |
| <i>FNDC3B</i>  | 0.0449 | 0.2606 | CMC    | Nonsynonymous variants and in-frame indels | non-EDS gene |
| <i>TGFBI</i>   | 0.0452 | 0.2606 | kbac   | Nonsynonymous variants and in-frame indels | non-EDS gene |
| <i>COL12A1</i> | 0.0455 | 0.2606 | CMC    | Synonymous variants                        | EDS gene     |
| <i>RDH13</i>   | 0.0468 | 0.2606 | calpha | Synonymous variants                        | non-EDS gene |
| <i>ZNF469</i>  | 0.047  | 0.2606 | calpha | Nonsynonymous variants and in-frame indels | EDS gene     |
| <i>SOD1</i>    | 0.0476 | 0.2606 | skat   | Intronic variants                          | non-EDS gene |
| <i>ZEB1</i>    | 0.0484 | 0.2606 | kbac   | Synonymous variants                        | non-EDS gene |
| <i>DOCK1</i>   | 0.0486 | 0.2606 | vt     | Synonymous variants                        | non-EDS gene |
| <i>ZEB1</i>    | 0.05   | 0.2606 | kbac   | Nonsynonymous variants and in-frame indels | non-EDS gene |
| <i>ZEB1</i>    | 0.0502 | 0.2606 | vt     | Intronic variants                          | non-EDS gene |
| <i>PRPH2</i>   | 0.0508 | 0.2606 | calpha | Synonymous variants                        | non-EDS gene |
| <i>PARP2</i>   | 0.0514 | 0.2606 | kbac   | Synonymous variants                        | non-EDS gene |
| <i>MMP9</i>    | 0.052  | 0.2606 | skat   | Synonymous variants                        | non-EDS gene |
| <i>VSX1</i>    | 0.0523 | 0.2606 | CMC    | Intronic variants                          | non-EDS gene |

|                |        |        |        |                                            |              |
|----------------|--------|--------|--------|--------------------------------------------|--------------|
| <i>IL1RN</i>   | 0.0525 | 0.2606 | CMC    | Synonymous variants                        | non-EDS gene |
| <i>TF</i>      | 0.0526 | 0.2606 | calpha | Synonymous variants                        | non-EDS gene |
| <i>IL1RN</i>   | 0.054  | 0.2646 | calpha | Synonymous variants                        | non-EDS gene |
| <i>LOX</i>     | 0.0548 | 0.2656 | kbac   | Nonsynonymous variants and in-frame indels | non-EDS gene |
| <i>COL5A3</i>  | 0.0556 | 0.2665 | kbac   | Synonymous variants                        | non-EDS gene |
| <i>IL1RN</i>   | 0.0582 | 0.2713 | vt     | Nonsynonymous variants and in-frame indels | non-EDS gene |
| <i>COL12A1</i> | 0.0586 | 0.2713 | vt     | Nonsynonymous variants and in-frame indels | EDS gene     |
| <i>FNDC3B</i>  | 0.0592 | 0.2713 | vt     | Intronic variants                          | non-EDS gene |
| <i>P3H4</i>    | 0.0598 | 0.2713 | CMC    | Synonymous variants                        | non-EDS gene |
| <i>COL12A1</i> | 0.06   | 0.2713 | kbac   | Nonsynonymous variants and in-frame indels | EDS gene     |
| <i>VSX1</i>    | 0.0606 | 0.2713 | kbac   | Nonsynonymous variants and in-frame indels | non-EDS gene |
| <i>LOXHD1</i>  | 0.0614 | 0.2713 | kbac   | Synonymous variants                        | non-EDS gene |
| <i>SOD1</i>    | 0.0624 | 0.2713 | calpha | Intronic variants                          | non-EDS gene |
| <i>TGFBI</i>   | 0.0628 | 0.2713 | vt     | Nonsynonymous variants and in-frame indels | non-EDS gene |
| <i>TNXB</i>    | 0.0632 | 0.2713 | calpha | Nonsynonymous variants and in-frame indels | EDS gene     |
| <i>NLRP1</i>   | 0.0633 | 0.2713 | skat   | Synonymous variants                        | non-EDS gene |
| <i>DOCK1</i>   | 0.0654 | 0.2726 | kbac   | Synonymous variants                        | non-EDS gene |
| <i>MMP9</i>    | 0.0654 | 0.2726 | vt     | Nonsynonymous variants and in-frame indels | non-EDS gene |
| <i>ZEB1</i>    | 0.0658 | 0.2726 | calpha | Synonymous variants                        | non-EDS gene |
| <i>TNXB</i>    | 0.068  | 0.2726 | calpha | Intronic variants                          | EDS gene     |
| <i>TF</i>      | 0.0684 | 0.2726 | kbac   | Intronic variants                          | non-EDS gene |
| <i>SLC4A11</i> | 0.0688 | 0.2726 | skat   | 5' UTR variants                            | non-EDS gene |
| <i>ZEB1</i>    | 0.0692 | 0.2726 | calpha | Intronic variants                          | non-EDS gene |
| <i>DOCK1</i>   | 0.07   | 0.2726 | kbac   | Intronic variants                          | non-EDS gene |
| <i>FNDC3B</i>  | 0.0701 | 0.2726 | CMC    | Intronic variants                          | non-EDS gene |
| <i>DOCK1</i>   | 0.0701 | 0.2726 | CMC    | Synonymous variants                        | non-EDS gene |
| <i>DOCK1</i>   | 0.0714 | 0.2726 | CMC    | Intronic variants                          | non-EDS gene |
| <i>TF</i>      | 0.0714 | 0.2726 | vt     | Intronic variants                          | non-EDS gene |
| <i>PRPH2</i>   | 0.0715 | 0.2726 | CMC    | Synonymous variants                        | non-EDS gene |
| <i>LOX</i>     | 0.0738 | 0.2788 | vt     | Nonsynonymous variants and in-frame indels | non-EDS gene |

|                |        |        |        |                                            |              |
|----------------|--------|--------|--------|--------------------------------------------|--------------|
| <i>LOXHD1</i>  | 0.0746 | 0.2793 | vt     | Synonymous variants                        | non-EDS gene |
| <i>FNDC3B</i>  | 0.0756 | 0.2793 | vt     | Synonymous variants                        | non-EDS gene |
| <i>COL5A1</i>  | 0.0758 | 0.2793 | calpha | Intronic variants                          | EDS gene     |
| <i>VSX1</i>    | 0.077  | 0.2814 | skat   | Nonsynonymous variants and in-frame indels | non-EDS gene |
| <i>EPPK1</i>   | 0.081  | 0.2936 | vt     | Nonsynonymous variants and in-frame indels | non-EDS gene |
| <i>DOCK9</i>   | 0.0828 | 0.2977 | vt     | Intronic variants                          | non-EDS gene |
| <i>LAMC3</i>   | 0.0846 | 0.3017 | kbac   | Intronic variants                          | non-EDS gene |
| <i>COL12A1</i> | 0.0863 | 0.3044 | CMC    | Nonsynonymous variants and in-frame indels | EDS gene     |
| <i>ZEB1</i>    | 0.0868 | 0.3044 | calpha | Nonsynonymous variants and in-frame indels | non-EDS gene |
| <i>SLC4A11</i> | 0.0874 | 0.3044 | vt     | Synonymous variants                        | non-EDS gene |
| <i>PARP2</i>   | 0.0888 | 0.3045 | calpha | Synonymous variants                        | non-EDS gene |
| <i>IL1RN</i>   | 0.0888 | 0.3045 | vt     | Intronic variants                          | non-EDS gene |
| <i>MMP9</i>    | 0.0908 | 0.307  | calpha | Nonsynonymous variants and in-frame indels | non-EDS gene |
| <i>LAMC3</i>   | 0.0916 | 0.307  | kbac   | Synonymous variants                        | non-EDS gene |
| <i>IL1RN</i>   | 0.0922 | 0.307  | kbac   | Nonsynonymous variants and in-frame indels | non-EDS gene |
| <i>FNDC3B</i>  | 0.0931 | 0.307  | skat   | Synonymous variants                        | non-EDS gene |
| <i>TF</i>      | 0.0943 | 0.307  | skat   | Intronic variants                          | non-EDS gene |
| <i>MMP9</i>    | 0.0954 | 0.307  | CMC    | Nonsynonymous variants and in-frame indels | non-EDS gene |
| <i>EPPK1</i>   | 0.0962 | 0.307  | kbac   | Synonymous variants                        | non-EDS gene |
| <i>FNDC3B</i>  | 0.0962 | 0.307  | CMC    | Synonymous variants                        | non-EDS gene |
| <i>PARP2</i>   | 0.0962 | 0.307  | CMC    | Synonymous variants                        | non-EDS gene |
| <i>RDH13</i>   | 0.0964 | 0.307  | calpha | Intronic variants                          | non-EDS gene |
| <i>WNT10A</i>  | 0.0971 | 0.3072 | skat   | 5' UTR variants                            | non-EDS gene |
| <i>SLC4A11</i> | 0.0988 | 0.3082 | vt     | 5' UTR variants                            | non-EDS gene |
| <i>VSX1</i>    | 0.0988 | 0.3082 | skat   | Intronic variants                          | non-EDS gene |
| <i>SLC4A11</i> | 0.103  | 0.3124 | kbac   | 5' UTR variants                            | non-EDS gene |
| <i>IL1RN</i>   | 0.1038 | 0.3124 | kbac   | Intronic variants                          | non-EDS gene |
| <i>COL5A3</i>  | 0.104  | 0.3124 | vt     | Synonymous variants                        | non-EDS gene |
| <i>LOXHD1</i>  | 0.104  | 0.3124 | CMC    | Synonymous variants                        | non-EDS gene |
| <i>RDH13</i>   | 0.1044 | 0.3124 | vt     | Nonsense and frameshift variants           | non-EDS gene |



|                |        |        |        |                                            |              |
|----------------|--------|--------|--------|--------------------------------------------|--------------|
| <i>LCA5</i>    | 0.1058 | 0.3124 | CMC    | Nonsynonymous variants and in-frame indels | non-EDS gene |
| <i>TGFBI</i>   | 0.1058 | 0.3124 | CMC    | Nonsynonymous variants and in-frame indels | non-EDS gene |
| <i>SLC4A11</i> | 0.1058 | 0.3124 | calpha | 5' UTR variants                            | non-EDS gene |
| <i>ZEB1</i>    | 0.1104 | 0.3185 | CMC    | Intronic variants                          | non-EDS gene |
| <i>DOCK9</i>   | 0.1112 | 0.3185 | kbac   | Synonymous variants                        | non-EDS gene |
| <i>TNXB</i>    | 0.1113 | 0.3185 | CMC    | Intronic variants                          | EDS gene     |
| <i>LOXHD1</i>  | 0.1146 | 0.3185 | kbac   | Nonsynonymous variants and in-frame indels | non-EDS gene |
| <i>DOCK1</i>   | 0.1148 | 0.3185 | skat   | 5' UTR variants                            | non-EDS gene |
| <i>IL1RN</i>   | 0.115  | 0.3185 | skat   | Intronic variants                          | non-EDS gene |
| <i>PARP1</i>   | 0.1153 | 0.3185 | calpha | Synonymous variants                        | non-EDS gene |
| <i>RDH13</i>   | 0.1179 | 0.3185 | calpha | Nonsense and frameshift variants           | non-EDS gene |
| <i>FOXO1</i>   | 0.118  | 0.3185 | vt     | Nonsynonymous variants and in-frame indels | non-EDS gene |
| <i>HLA-G</i>   | 0.1191 | 0.3185 | skat   | Intronic variants                          | non-EDS gene |
| <i>IL1RN</i>   | 0.1209 | 0.3185 | calpha | Nonsynonymous variants and in-frame indels | non-EDS gene |
| <i>HLA-G</i>   | 0.1209 | 0.3185 | kbac   | Intronic variants                          | non-EDS gene |
| <i>DOCK9</i>   | 0.1209 | 0.3185 | kbac   | Intronic variants                          | non-EDS gene |
| <i>COL5A3</i>  | 0.1214 | 0.3185 | skat   | 3' UTR variants                            | non-EDS gene |
| <i>EPPK1</i>   | 0.1219 | 0.3185 | kbac   | Nonsynonymous variants and in-frame indels | non-EDS gene |
| <i>EPPK1</i>   | 0.1219 | 0.3185 | vt     | Synonymous variants                        | non-EDS gene |
| <i>PARP2</i>   | 0.1234 | 0.3185 | calpha | Nonsynonymous variants and in-frame indels | non-EDS gene |
| <i>SLC4A11</i> | 0.1239 | 0.3185 | vt     | Intronic variants                          | non-EDS gene |
| <i>NLRP1</i>   | 0.1241 | 0.3185 | skat   | 3' UTR variants                            | non-EDS gene |
| <i>LOX</i>     | 0.1249 | 0.3185 | calpha | Nonsynonymous variants and in-frame indels | non-EDS gene |
| <i>PARP1</i>   | 0.1249 | 0.3185 | vt     | Nonsynonymous variants and in-frame indels | non-EDS gene |
| <i>COL12A1</i> | 0.1252 | 0.3185 | skat   | Intronic variants                          | EDS gene     |
| <i>LAMC3</i>   | 0.1259 | 0.3185 | vt     | Synonymous variants                        | non-EDS gene |
| <i>MIR184</i>  | 0.1268 | 0.3185 | skat   | noncoding RNA 5'                           | non-EDS gene |
| <i>NLRP1</i>   | 0.1269 | 0.3185 | kbac   | 3' UTR variants                            | non-EDS gene |
| <i>HLA-G</i>   | 0.127  | 0.3185 | skat   | Nonsynonymous variants and in-frame indels | non-EDS gene |
| <i>RDH13</i>   | 0.1279 | 0.3185 | vt     | Intronic variants                          | non-EDS gene |

|                |        |        |        |                                            |              |
|----------------|--------|--------|--------|--------------------------------------------|--------------|
| <i>DOCK1</i>   | 0.1289 | 0.3185 | calpha | Intronic variants                          | non-EDS gene |
| <i>RDH13</i>   | 0.1289 | 0.3185 | kbac   | Nonsense and frameshift variants           | non-EDS gene |
| <i>RDH13</i>   | 0.1301 | 0.3185 | CMC    | Intronic variants                          | non-EDS gene |
| <i>SLC4A11</i> | 0.1304 | 0.3185 | CMC    | Synonymous variants                        | non-EDS gene |
| <i>LAMC3</i>   | 0.1309 | 0.3185 | vt     | Intronic variants                          | non-EDS gene |
| <i>ZEB1</i>    | 0.1324 | 0.3185 | skat   | Nonsynonymous variants and in-frame indels | non-EDS gene |
| <i>TGFBI</i>   | 0.1329 | 0.3185 | calpha | Nonsynonymous variants and in-frame indels | non-EDS gene |
| <i>SLC4A11</i> | 0.1329 | 0.3185 | kbac   | Intronic variants                          | non-EDS gene |
| <i>MMP9</i>    | 0.1374 | 0.3258 | kbac   | Synonymous variants                        | non-EDS gene |
| <i>ZEB1</i>    | 0.1379 | 0.3258 | vt     | Nonsynonymous variants and in-frame indels | non-EDS gene |
| <i>NLRP1</i>   | 0.1389 | 0.3258 | calpha | Synonymous variants                        | non-EDS gene |
| <i>DCAF11</i>  | 0.1389 | 0.3258 | kbac   | Nonsynonymous variants and in-frame indels | non-EDS gene |
| <i>EPPK1</i>   | 0.1395 | 0.3258 | skat   | Nonsense and frameshift variants           | non-EDS gene |
| <i>LAMC3</i>   | 0.1419 | 0.328  | skat   | Synonymous variants                        | non-EDS gene |
| <i>FOXO1</i>   | 0.1423 | 0.328  | skat   | Synonymous variants                        | non-EDS gene |
| <i>ZEB1</i>    | 0.1427 | 0.328  | skat   | Intronic variants                          | non-EDS gene |
| <i>LAMC3</i>   | 0.1459 | 0.3318 | kbac   | Nonsynonymous variants and in-frame indels | non-EDS gene |
| <i>PARP1</i>   | 0.1459 | 0.3318 | kbac   | Nonsynonymous variants and in-frame indels | non-EDS gene |
| <i>RDH13</i>   | 0.1498 | 0.3391 | skat   | 5' UTR variants                            | non-EDS gene |
| <i>NLRP1</i>   | 0.1528 | 0.343  | calpha | 3' UTR variants                            | non-EDS gene |
| <i>COL5A3</i>  | 0.1533 | 0.343  | CMC    | Synonymous variants                        | non-EDS gene |
| <i>SOD1</i>    | 0.1552 | 0.343  | skat   | 5' UTR variants                            | non-EDS gene |
| <i>WNT10A</i>  | 0.1556 | 0.343  | skat   | Synonymous variants                        | non-EDS gene |
| <i>ZEB1</i>    | 0.1564 | 0.343  | CMC    | Nonsynonymous variants and in-frame indels | non-EDS gene |
| <i>P3H4</i>    | 0.1578 | 0.343  | kbac   | Intronic variants                          | non-EDS gene |
| <i>TNXB</i>    | 0.1585 | 0.343  | skat   | Nonsense and frameshift variants           | EDS gene     |
| <i>LAMC3</i>   | 0.1598 | 0.343  | vt     | Nonsynonymous variants and in-frame indels | non-EDS gene |
| <i>WNT10A</i>  | 0.16   | 0.343  | skat   | Nonsynonymous variants and in-frame indels | non-EDS gene |
| <i>FNDC3B</i>  | 0.1628 | 0.343  | calpha | Synonymous variants                        | non-EDS gene |
| <i>IL1RN</i>   | 0.1631 | 0.343  | CMC    | Nonsynonymous variants and in-frame indels | non-EDS gene |

|                |        |        |        |                                            |              |
|----------------|--------|--------|--------|--------------------------------------------|--------------|
| <i>SLC4A11</i> | 0.1634 | 0.343  | skat   | Synonymous variants                        | non-EDS gene |
| <i>LOX</i>     | 0.1636 | 0.343  | CMC    | Nonsynonymous variants and in-frame indels | non-EDS gene |
| <i>PARP1</i>   | 0.1638 | 0.343  | calpha | Nonsense and frameshift variants           | non-EDS gene |
| <i>COL12A1</i> | 0.1638 | 0.343  | calpha | Intronic variants                          | EDS gene     |
| <i>VSX1</i>    | 0.1638 | 0.343  | vt     | Nonsynonymous variants and in-frame indels | non-EDS gene |
| <i>P3H4</i>    | 0.1668 | 0.3476 | vt     | Intronic variants                          | non-EDS gene |
| <i>LAMC3</i>   | 0.1714 | 0.3555 | CMC    | Intronic variants                          | non-EDS gene |
| <i>FOXO1</i>   | 0.1738 | 0.3588 | kbac   | Nonsynonymous variants and in-frame indels | non-EDS gene |
| <i>COL5A3</i>  | 0.1808 | 0.3657 | vt     | Nonsynonymous variants and in-frame indels | non-EDS gene |
| <i>DCAF11</i>  | 0.1818 | 0.3657 | vt     | Nonsynonymous variants and in-frame indels | non-EDS gene |
| <i>MMP9</i>    | 0.1838 | 0.3657 | vt     | Synonymous variants                        | non-EDS gene |
| <i>ZEB1</i>    | 0.1838 | 0.3657 | vt     | Synonymous variants                        | non-EDS gene |
| <i>ZEB1</i>    | 0.1842 | 0.3657 | skat   | Nonsense and frameshift variants           | non-EDS gene |
| <i>COL5A3</i>  | 0.1848 | 0.3657 | kbac   | Intronic variants                          | non-EDS gene |
| <i>VSX1</i>    | 0.1853 | 0.3657 | skat   | Nonsense and frameshift variants           | non-EDS gene |
| <i>LAMC3</i>   | 0.1858 | 0.3657 | CMC    | Synonymous variants                        | non-EDS gene |
| <i>COL12A1</i> | 0.1863 | 0.3657 | skat   | Nonsynonymous variants and in-frame indels | EDS gene     |
| <i>COL12A1</i> | 0.1864 | 0.3657 | skat   | Nonsense and frameshift variants           | EDS gene     |
| <i>FASLG</i>   | 0.1876 | 0.3657 | skat   | Synonymous variants                        | non-EDS gene |
| <i>FNDC3B</i>  | 0.1878 | 0.3657 | calpha | Nonsynonymous variants and in-frame indels | non-EDS gene |
| <i>DOCK9</i>   | 0.1878 | 0.3657 | vt     | Synonymous variants                        | non-EDS gene |
| <i>DOCK9</i>   | 0.1894 | 0.3672 | skat   | Nonsynonymous variants and in-frame indels | non-EDS gene |
| <i>LCA5</i>    | 0.1938 | 0.3735 | calpha | Nonsynonymous variants and in-frame indels | non-EDS gene |
| <i>ZEB1</i>    | 0.1945 | 0.3735 | CMC    | Synonymous variants                        | non-EDS gene |
| <i>DCAF11</i>  | 0.1958 | 0.3735 | kbac   | Synonymous variants                        | non-EDS gene |
| <i>LOXHD1</i>  | 0.1968 | 0.3735 | vt     | Nonsynonymous variants and in-frame indels | non-EDS gene |
| <i>DOCK9</i>   | 0.1971 | 0.3735 | CMC    | Intronic variants                          | non-EDS gene |
| <i>RDH13</i>   | 0.1977 | 0.3735 | skat   | Nonsense and frameshift variants           | non-EDS gene |
| <i>EPPK1</i>   | 0.1986 | 0.3735 | CMC    | Nonsynonymous variants and in-frame indels | non-EDS gene |
| <i>SLC4A11</i> | 0.1998 | 0.3735 | calpha | Synonymous variants                        | non-EDS gene |

|                |        |        |        |                                            |              |
|----------------|--------|--------|--------|--------------------------------------------|--------------|
| <i>VSX1</i>    | 0.2002 | 0.3735 | CMC    | Nonsynonymous variants and in-frame indels | non-EDS gene |
| <i>PARP1</i>   | 0.2028 | 0.3755 | calpha | Nonsynonymous variants and in-frame indels | non-EDS gene |
| <i>SLC4A11</i> | 0.2029 | 0.3755 | CMC    | 5' UTR variants                            | non-EDS gene |
| <i>IL1RN</i>   | 0.2068 | 0.381  | calpha | Intronic variants                          | non-EDS gene |
| <i>NLRP1</i>   | 0.2094 | 0.3842 | skat   | Nonsense and frameshift variants           | non-EDS gene |
| <i>DCAF11</i>  | 0.222  | 0.4046 | skat   | Nonsynonymous variants and in-frame indels | non-EDS gene |
| <i>TF</i>      | 0.2223 | 0.4046 | CMC    | Intronic variants                          | non-EDS gene |
| <i>LAMC3</i>   | 0.2261 | 0.4094 | CMC    | Nonsynonymous variants and in-frame indels | non-EDS gene |
| <i>COL5A3</i>  | 0.2268 | 0.4094 | kbac   | Nonsynonymous variants and in-frame indels | non-EDS gene |
| <i>RDH13</i>   | 0.2294 | 0.4118 | CMC    | Nonsense and frameshift variants           | non-EDS gene |
| <i>COL5A3</i>  | 0.23   | 0.4118 | CMC    | 3' UTR variants                            | non-EDS gene |
| <i>MIR184</i>  | 0.233  | 0.4141 | CMC    | noncoding RNA 5'                           | non-EDS gene |
| <i>HLA-G</i>   | 0.2331 | 0.4141 | CMC    | Nonsynonymous variants and in-frame indels | non-EDS gene |
| <i>WNT10A</i>  | 0.2358 | 0.4172 | calpha | Nonsynonymous variants and in-frame indels | non-EDS gene |
| <i>LOXHD1</i>  | 0.2399 | 0.4227 | CMC    | Nonsynonymous variants and in-frame indels | non-EDS gene |
| <i>PARP1</i>   | 0.2418 | 0.4244 | kbac   | Intronic variants                          | non-EDS gene |
| <i>DOCK9</i>   | 0.2448 | 0.4282 | skat   | Intronic variants                          | non-EDS gene |
| <i>VSX1</i>    | 0.2465 | 0.4293 | skat   | 3' UTR variants                            | non-EDS gene |
| <i>FOXO1</i>   | 0.2507 | 0.4335 | calpha | Nonsynonymous variants and in-frame indels | non-EDS gene |
| <i>PARP1</i>   | 0.2508 | 0.4335 | CMC    | Nonsense and frameshift variants           | non-EDS gene |
| <i>TNXB</i>    | 0.2537 | 0.4369 | calpha | Synonymous variants                        | EDS gene     |
| <i>MMP9</i>    | 0.2567 | 0.4403 | calpha | Synonymous variants                        | non-EDS gene |
| <i>DOCK1</i>   | 0.2585 | 0.4416 | skat   | Synonymous variants                        | non-EDS gene |
| <i>SLC4A11</i> | 0.2594 | 0.4416 | CMC    | Intronic variants                          | non-EDS gene |
| <i>LOXHD1</i>  | 0.2687 | 0.4532 | kbac   | Intronic variants                          | non-EDS gene |
| <i>FOXO1</i>   | 0.2701 | 0.4532 | CMC    | Nonsynonymous variants and in-frame indels | non-EDS gene |
| <i>IL1RN</i>   | 0.2701 | 0.4532 | CMC    | Intronic variants                          | non-EDS gene |
| <i>EPPK1</i>   | 0.2712 | 0.4532 | CMC    | Synonymous variants                        | non-EDS gene |
| <i>DOCK9</i>   | 0.2714 | 0.4532 | CMC    | Synonymous variants                        | non-EDS gene |
| <i>PARP1</i>   | 0.2769 | 0.4595 | skat   | Intronic variants                          | non-EDS gene |

|                |        |        |        |                                            |              |
|----------------|--------|--------|--------|--------------------------------------------|--------------|
| <i>FOXO1</i>   | 0.2777 | 0.4595 | calpha | Synonymous variants                        | non-EDS gene |
| <i>COL5A3</i>  | 0.2782 | 0.4595 | skat   | Intronic variants                          | non-EDS gene |
| <i>COL5A1</i>  | 0.2832 | 0.466  | skat   | Nonsynonymous variants and in-frame indels | EDS gene     |
| <i>DOCK1</i>   | 0.2887 | 0.4714 | kbac   | Nonsynonymous variants and in-frame indels | non-EDS gene |
| <i>LOXHD1</i>  | 0.2897 | 0.4714 | vt     | Nonsense and frameshift variants           | non-EDS gene |
| <i>DOCK9</i>   | 0.2907 | 0.4714 | calpha | Nonsynonymous variants and in-frame indels | non-EDS gene |
| <i>EPPK1</i>   | 0.2907 | 0.4714 | calpha | Nonsynonymous variants and in-frame indels | non-EDS gene |
| <i>PARP1</i>   | 0.293  | 0.4734 | CMC    | Nonsynonymous variants and in-frame indels | non-EDS gene |
| <i>VSX1</i>    | 0.2967 | 0.4759 | calpha | Nonsynonymous variants and in-frame indels | non-EDS gene |
| <i>COL2A1</i>  | 0.2967 | 0.4759 | vt     | Synonymous variants                        | non-EDS gene |
| <i>TNXB</i>    | 0.2987 | 0.4774 | kbac   | Synonymous variants                        | EDS gene     |
| <i>PARP2</i>   | 0.3054 | 0.4851 | skat   | Intronic variants                          | non-EDS gene |
| <i>COL5A3</i>  | 0.3057 | 0.4851 | vt     | Intronic variants                          | non-EDS gene |
| <i>TF</i>      | 0.3107 | 0.4913 | calpha | Intronic variants                          | non-EDS gene |
| <i>DCAF11</i>  | 0.3159 | 0.4978 | CMC    | Nonsynonymous variants and in-frame indels | non-EDS gene |
| <i>LOXHD1</i>  | 0.3183 | 0.4998 | skat   | Nonsense and frameshift variants           | non-EDS gene |
| <i>LOXHD1</i>  | 0.3197 | 0.5002 | kbac   | Nonsense and frameshift variants           | non-EDS gene |
| <i>RDH13</i>   | 0.3237 | 0.5047 | calpha | Nonsynonymous variants and in-frame indels | non-EDS gene |
| <i>PARP2</i>   | 0.3267 | 0.5058 | kbac   | Intronic variants                          | non-EDS gene |
| <i>HLA-G</i>   | 0.3267 | 0.5058 | vt     | Intronic variants                          | non-EDS gene |
| <i>DOCK9</i>   | 0.3357 | 0.5179 | calpha | 3' UTR variants                            | non-EDS gene |
| <i>COL12A1</i> | 0.3397 | 0.5223 | calpha | Synonymous variants                        | EDS gene     |
| <i>COL5A3</i>  | 0.3437 | 0.526  | calpha | Intronic variants                          | non-EDS gene |
| <i>PRPH2</i>   | 0.3457 | 0.526  | calpha | 3' UTR variants                            | non-EDS gene |
| <i>SOD1</i>    | 0.3457 | 0.526  | vt     | Intronic variants                          | non-EDS gene |
| <i>LOX</i>     | 0.3516 | 0.5293 | calpha | 3' UTR variants                            | non-EDS gene |
| <i>DCAF11</i>  | 0.3516 | 0.5293 | kbac   | 3' UTR variants                            | non-EDS gene |
| <i>TNXB</i>    | 0.3536 | 0.5293 | vt     | Synonymous variants                        | EDS gene     |
| <i>P3H4</i>    | 0.3541 | 0.5293 | CMC    | Intronic variants                          | non-EDS gene |
| <i>DCAF11</i>  | 0.3546 | 0.5293 | calpha | Intronic variants                          | non-EDS gene |

|                |        |        |        |                                            |              |
|----------------|--------|--------|--------|--------------------------------------------|--------------|
| <i>MMP9</i>    | 0.3549 | 0.5293 | CMC    | Synonymous variants                        | non-EDS gene |
| <i>PRPH2</i>   | 0.3626 | 0.538  | calpha | Intronic variants                          | non-EDS gene |
| <i>DOCK1</i>   | 0.3666 | 0.538  | vt     | Nonsynonymous variants and in-frame indels | non-EDS gene |
| <i>PARP1</i>   | 0.3676 | 0.538  | vt     | Intronic variants                          | non-EDS gene |
| <i>WNT10A</i>  | 0.3685 | 0.538  | CMC    | 5' UTR variants                            | non-EDS gene |
| <i>NLRP1</i>   | 0.3696 | 0.538  | vt     | Intronic variants                          | non-EDS gene |
| <i>SLC4A11</i> | 0.3706 | 0.538  | calpha | Intronic variants                          | non-EDS gene |
| <i>DCAF11</i>  | 0.3706 | 0.538  | vt     | Synonymous variants                        | non-EDS gene |
| <i>COL5A3</i>  | 0.3715 | 0.538  | skat   | Synonymous variants                        | non-EDS gene |
| <i>DOCK1</i>   | 0.3726 | 0.538  | calpha | Synonymous variants                        | non-EDS gene |
| <i>COL5A3</i>  | 0.3739 | 0.538  | CMC    | Intronic variants                          | non-EDS gene |
| <i>NLRP1</i>   | 0.3756 | 0.538  | kbac   | Synonymous variants                        | non-EDS gene |
| <i>COL2A1</i>  | 0.3766 | 0.538  | vt     | Nonsynonymous variants and in-frame indels | non-EDS gene |
| <i>DOCK9</i>   | 0.3774 | 0.538  | skat   | Synonymous variants                        | non-EDS gene |
| <i>LOXHD1</i>  | 0.3776 | 0.538  | vt     | Intronic variants                          | non-EDS gene |
| <i>LAMC3</i>   | 0.3837 | 0.5449 | skat   | Intronic variants                          | non-EDS gene |
| <i>P3H4</i>    | 0.3866 | 0.5473 | calpha | Intronic variants                          | non-EDS gene |
| <i>COL2A1</i>  | 0.3966 | 0.558  | kbac   | Nonsynonymous variants and in-frame indels | non-EDS gene |
| <i>LOXHD1</i>  | 0.3967 | 0.558  | skat   | Synonymous variants                        | non-EDS gene |
| <i>TF</i>      | 0.4036 | 0.5634 | calpha | Nonsynonymous variants and in-frame indels | non-EDS gene |
| <i>DOCK1</i>   | 0.4036 | 0.5634 | CMC    | 5' UTR variants                            | non-EDS gene |
| <i>EPPK1</i>   | 0.4044 | 0.5634 | skat   | Synonymous variants                        | non-EDS gene |
| <i>FNDC3B</i>  | 0.4056 | 0.5634 | calpha | Intronic variants                          | non-EDS gene |
| <i>RDH13</i>   | 0.4096 | 0.5672 | kbac   | Synonymous variants                        | non-EDS gene |
| <i>DCAF11</i>  | 0.4146 | 0.5723 | vt     | 3' UTR variants                            | non-EDS gene |
| <i>LOXHD1</i>  | 0.4206 | 0.5771 | calpha | Nonsynonymous variants and in-frame indels | non-EDS gene |
| <i>LAMC3</i>   | 0.4206 | 0.5771 | calpha | Synonymous variants                        | non-EDS gene |
| <i>COL5A1</i>  | 0.4246 | 0.5804 | kbac   | Nonsynonymous variants and in-frame indels | EDS gene     |
| <i>FOXO1</i>   | 0.4276 | 0.5804 | kbac   | Synonymous variants                        | non-EDS gene |
| <i>P3H4</i>    | 0.43   | 0.5804 | skat   | Intronic variants                          | non-EDS gene |

|                |        |        |        |                                            |              |
|----------------|--------|--------|--------|--------------------------------------------|--------------|
| <i>NLRP1</i>   | 0.4326 | 0.5804 | kbac   | Intronic variants                          | non-EDS gene |
| <i>COL5A3</i>  | 0.4343 | 0.5804 | CMC    | Nonsynonymous variants and in-frame indels | non-EDS gene |
| <i>NLRP1</i>   | 0.4348 | 0.5804 | CMC    | 3' UTR variants                            | non-EDS gene |
| <i>HLA-G</i>   | 0.4348 | 0.5804 | CMC    | Intronic variants                          | non-EDS gene |
| <i>DCAF11</i>  | 0.4352 | 0.5804 | skat   | Synonymous variants                        | non-EDS gene |
| <i>SLC4A11</i> | 0.4368 | 0.5804 | skat   | Intronic variants                          | non-EDS gene |
| <i>TGFBI</i>   | 0.439  | 0.5804 | skat   | Intronic variants                          | non-EDS gene |
| <i>EPPK1</i>   | 0.4401 | 0.5804 | CMC    | Nonsense and frameshift variants           | non-EDS gene |
| <i>COL2A1</i>  | 0.4416 | 0.5804 | kbac   | Synonymous variants                        | non-EDS gene |
| <i>LAMC3</i>   | 0.4426 | 0.5804 | calpha | Intronic variants                          | non-EDS gene |
| <i>DOCK1</i>   | 0.4436 | 0.5804 | kbac   | 3' UTR variants                            | non-EDS gene |
| <i>TGFBI</i>   | 0.4436 | 0.5804 | vt     | Intronic variants                          | non-EDS gene |
| <i>EPPK1</i>   | 0.4496 | 0.5804 | calpha | Synonymous variants                        | non-EDS gene |
| <i>P3H4</i>    | 0.4496 | 0.5804 | vt     | Nonsynonymous variants and in-frame indels | non-EDS gene |
| <i>NLRP1</i>   | 0.4525 | 0.5804 | vt     | Synonymous variants                        | non-EDS gene |
| <i>TGFBI</i>   | 0.4535 | 0.5804 | kbac   | Intronic variants                          | non-EDS gene |
| <i>PARP2</i>   | 0.4545 | 0.5804 | vt     | Intronic variants                          | non-EDS gene |
| <i>DOCK9</i>   | 0.4549 | 0.5804 | CMC    | 3' UTR variants                            | non-EDS gene |
| <i>TGFBI</i>   | 0.4575 | 0.5804 | kbac   | Synonymous variants                        | non-EDS gene |
| <i>DOCK1</i>   | 0.4575 | 0.5804 | vt     | 3' UTR variants                            | non-EDS gene |
| <i>PARP1</i>   | 0.458  | 0.5804 | CMC    | Intronic variants                          | non-EDS gene |
| <i>RDH13</i>   | 0.4583 | 0.5804 | CMC    | 5' UTR variants                            | non-EDS gene |
| <i>VSX1</i>    | 0.4585 | 0.5804 | kbac   | Synonymous variants                        | non-EDS gene |
| <i>TF</i>      | 0.4586 | 0.5804 | CMC    | Nonsynonymous variants and in-frame indels | non-EDS gene |
| <i>FASLG</i>   | 0.4595 | 0.5804 | kbac   | Nonsynonymous variants and in-frame indels | non-EDS gene |
| <i>WNT10A</i>  | 0.4608 | 0.5804 | CMC    | Synonymous variants                        | non-EDS gene |
| <i>TNXB</i>    | 0.4651 | 0.5842 | CMC    | Nonsense and frameshift variants           | EDS gene     |
| <i>DOCK1</i>   | 0.4709 | 0.5858 | skat   | 3' UTR variants                            | non-EDS gene |
| <i>SOD1</i>    | 0.4725 | 0.5858 | kbac   | Nonsynonymous variants and in-frame indels | non-EDS gene |
| <i>WNT10A</i>  | 0.4725 | 0.5858 | kbac   | Nonsynonymous variants and in-frame indels | non-EDS gene |

|                |        |        |        |                                            |              |
|----------------|--------|--------|--------|--------------------------------------------|--------------|
| <i>LCA5</i>    | 0.4765 | 0.5858 | vt     | Synonymous variants                        | non-EDS gene |
| <i>ZEB1</i>    | 0.4791 | 0.5858 | CMC    | Nonsense and frameshift variants           | non-EDS gene |
| <i>VSX1</i>    | 0.4794 | 0.5858 | CMC    | Nonsense and frameshift variants           | non-EDS gene |
| <i>TGFBI</i>   | 0.4795 | 0.5858 | vt     | Synonymous variants                        | non-EDS gene |
| <i>LOXHD1</i>  | 0.4796 | 0.5858 | CMC    | Intronic variants                          | non-EDS gene |
| <i>COL12A1</i> | 0.4797 | 0.5858 | CMC    | Nonsense and frameshift variants           | EDS gene     |
| <i>FASLG</i>   | 0.48   | 0.5858 | CMC    | Synonymous variants                        | non-EDS gene |
| <i>COL5A3</i>  | 0.4835 | 0.5858 | calpha | Synonymous variants                        | non-EDS gene |
| <i>NLRP1</i>   | 0.4844 | 0.5858 | CMC    | Nonsense and frameshift variants           | non-EDS gene |
| <i>FOXO1</i>   | 0.4845 | 0.5858 | vt     | Synonymous variants                        | non-EDS gene |
| <i>RDH13</i>   | 0.4855 | 0.5858 | vt     | Synonymous variants                        | non-EDS gene |
| <i>FASLG</i>   | 0.4885 | 0.5858 | vt     | Nonsynonymous variants and in-frame indels | non-EDS gene |
| <i>NLRP1</i>   | 0.4885 | 0.5858 | vt     | Nonsynonymous variants and in-frame indels | non-EDS gene |
| <i>VSX1</i>    | 0.4887 | 0.5858 | CMC    | 3' UTR variants                            | non-EDS gene |
| <i>DCAF11</i>  | 0.4912 | 0.5872 | CMC    | Synonymous variants                        | non-EDS gene |
| <i>SOD1</i>    | 0.4935 | 0.5884 | vt     | Nonsynonymous variants and in-frame indels | non-EDS gene |
| <i>PRPH2</i>   | 0.4997 | 0.592  | CMC    | Intronic variants                          | non-EDS gene |
| <i>PRPH2</i>   | 0.5003 | 0.592  | CMC    | 3' UTR variants                            | non-EDS gene |
| <i>LOX</i>     | 0.5006 | 0.592  | CMC    | 3' UTR variants                            | non-EDS gene |
| <i>LOX</i>     | 0.5075 | 0.5987 | calpha | Synonymous variants                        | non-EDS gene |
| <i>DOCK9</i>   | 0.5095 | 0.5994 | kbac   | Nonsynonymous variants and in-frame indels | non-EDS gene |
| <i>LOX</i>     | 0.5115 | 0.6002 | calpha | 5' UTR variants                            | non-EDS gene |
| <i>LOXHD1</i>  | 0.5135 | 0.601  | calpha | Nonsense and frameshift variants           | non-EDS gene |
| <i>LOXHD1</i>  | 0.5155 | 0.6017 | calpha | Synonymous variants                        | non-EDS gene |
| <i>VSX1</i>    | 0.5185 | 0.6036 | vt     | Synonymous variants                        | non-EDS gene |
| <i>NLRP1</i>   | 0.5205 | 0.6044 | kbac   | Nonsynonymous variants and in-frame indels | non-EDS gene |
| <i>DOCK1</i>   | 0.5271 | 0.6105 | CMC    | Nonsynonymous variants and in-frame indels | non-EDS gene |
| <i>PARP1</i>   | 0.5335 | 0.6147 | calpha | Intronic variants                          | non-EDS gene |
| <i>NLRP1</i>   | 0.5335 | 0.6147 | vt     | 3' UTR variants                            | non-EDS gene |
| <i>COL5A1</i>  | 0.5455 | 0.6269 | vt     | Nonsynonymous variants and in-frame indels | EDS gene     |



|                |        |        |        |                                            |              |
|----------------|--------|--------|--------|--------------------------------------------|--------------|
| <i>VSX1</i>    | 0.5504 | 0.6307 | calpha | Synonymous variants                        | non-EDS gene |
| <i>HLA-G</i>   | 0.5524 | 0.6307 | calpha | Intronic variants                          | non-EDS gene |
| <i>FASLG</i>   | 0.5536 | 0.6307 | skat   | Nonsynonymous variants and in-frame indels | non-EDS gene |
| <i>VSX1</i>    | 0.5556 | 0.6307 | skat   | Synonymous variants                        | non-EDS gene |
| <i>LCA5</i>    | 0.5559 | 0.6307 | skat   | Intronic variants                          | non-EDS gene |
| <i>DOCK9</i>   | 0.5684 | 0.6433 | vt     | Nonsynonymous variants and in-frame indels | non-EDS gene |
| <i>PARP2</i>   | 0.5714 | 0.6451 | calpha | Intronic variants                          | non-EDS gene |
| <i>LOX</i>     | 0.5755 | 0.648  | skat   | Nonsense and frameshift variants           | non-EDS gene |
| <i>RDH13</i>   | 0.5838 | 0.6541 | CMC    | Nonsynonymous variants and in-frame indels | non-EDS gene |
| <i>PARP1</i>   | 0.5838 | 0.6541 | CMC    | Synonymous variants                        | non-EDS gene |
| <i>DOCK9</i>   | 0.5914 | 0.6609 | calpha | Synonymous variants                        | non-EDS gene |
| <i>P3H4</i>    | 0.5964 | 0.6638 | kbac   | Nonsynonymous variants and in-frame indels | non-EDS gene |
| <i>LCA5</i>    | 0.5974 | 0.6638 | vt     | Intronic variants                          | non-EDS gene |
| <i>SOD1</i>    | 0.5984 | 0.6638 | kbac   | Intronic variants                          | non-EDS gene |
| <i>WNT10A</i>  | 0.6004 | 0.6643 | vt     | Nonsynonymous variants and in-frame indels | non-EDS gene |
| <i>TGFBI</i>   | 0.6047 | 0.6675 | skat   | Synonymous variants                        | non-EDS gene |
| <i>LCA5</i>    | 0.6074 | 0.6677 | kbac   | Intronic variants                          | non-EDS gene |
| <i>DOCK1</i>   | 0.6079 | 0.6677 | skat   | Nonsynonymous variants and in-frame indels | non-EDS gene |
| <i>COL5A3</i>  | 0.6094 | 0.6677 | calpha | Nonsynonymous variants and in-frame indels | non-EDS gene |
| <i>SLC4A11</i> | 0.6154 | 0.6726 | vt     | Nonsynonymous variants and in-frame indels | non-EDS gene |
| <i>PRPH2</i>   | 0.6214 | 0.6747 | calpha | Nonsynonymous variants and in-frame indels | non-EDS gene |
| <i>FASLG</i>   | 0.6229 | 0.6747 | skat   | 5' UTR variants                            | non-EDS gene |
| <i>LOX</i>     | 0.6257 | 0.6747 | CMC    | 5' UTR variants                            | non-EDS gene |
| <i>PRPH2</i>   | 0.6258 | 0.6747 | CMC    | Nonsynonymous variants and in-frame indels | non-EDS gene |
| <i>LOX</i>     | 0.6258 | 0.6747 | CMC    | Synonymous variants                        | non-EDS gene |
| <i>DCAF11</i>  | 0.6264 | 0.6747 | kbac   | Intronic variants                          | non-EDS gene |
| <i>COL2A1</i>  | 0.6313 | 0.6761 | skat   | Intronic variants                          | non-EDS gene |
| <i>COL5A3</i>  | 0.6316 | 0.6761 | skat   | Nonsynonymous variants and in-frame indels | non-EDS gene |
| <i>LCA5</i>    | 0.6334 | 0.6761 | kbac   | Synonymous variants                        | non-EDS gene |
| <i>LOXHD1</i>  | 0.636  | 0.6761 | skat   | Nonsynonymous variants and in-frame indels | non-EDS gene |

|                |        |        |        |                                            |              |
|----------------|--------|--------|--------|--------------------------------------------|--------------|
| <i>TF</i>      | 0.6361 | 0.6761 | skat   | 5' UTR variants                            | non-EDS gene |
| <i>PARP2</i>   | 0.6368 | 0.6761 | CMC    | Intronic variants                          | non-EDS gene |
| <i>PRPH2</i>   | 0.643  | 0.6793 | skat   | Intronic variants                          | non-EDS gene |
| <i>DOCK9</i>   | 0.6434 | 0.6793 | calpha | Intronic variants                          | non-EDS gene |
| <i>SLC4A11</i> | 0.6444 | 0.6793 | kbac   | Nonsynonymous variants and in-frame indels | non-EDS gene |
| <i>COL5A1</i>  | 0.6464 | 0.6798 | calpha | Nonsynonymous variants and in-frame indels | EDS gene     |
| <i>PARP2</i>   | 0.6529 | 0.685  | skat   | Synonymous variants                        | non-EDS gene |
| <i>TGFBI</i>   | 0.6593 | 0.6897 | calpha | Intronic variants                          | non-EDS gene |
| <i>NLRP1</i>   | 0.6604 | 0.6897 | CMC    | Nonsynonymous variants and in-frame indels | non-EDS gene |
| <i>LOX</i>     | 0.6628 | 0.6905 | skat   | Intronic variants                          | non-EDS gene |
| <i>DCAF11</i>  | 0.6693 | 0.6957 | vt     | Intronic variants                          | non-EDS gene |
| <i>LOXHD1</i>  | 0.6751 | 0.6986 | CMC    | Nonsense and frameshift variants           | non-EDS gene |
| <i>DCAF11</i>  | 0.6753 | 0.6986 | CMC    | 3' UTR variants                            | non-EDS gene |
| <i>LOX</i>     | 0.6773 | 0.6991 | kbac   | Intronic variants                          | non-EDS gene |
| <i>EPPK1</i>   | 0.682  | 0.7023 | skat   | Nonsynonymous variants and in-frame indels | non-EDS gene |
| <i>NLRP1</i>   | 0.6873 | 0.7046 | calpha | Nonsynonymous variants and in-frame indels | non-EDS gene |
| <i>LOX</i>     | 0.6873 | 0.7046 | vt     | Intronic variants                          | non-EDS gene |
| <i>SOD1</i>    | 0.6897 | 0.7048 | CMC    | 5' UTR variants                            | non-EDS gene |
| <i>DCAF11</i>  | 0.6907 | 0.7048 | skat   | 3' UTR variants                            | non-EDS gene |
| <i>COL5A1</i>  | 0.702  | 0.7147 | CMC    | Nonsynonymous variants and in-frame indels | EDS gene     |
| <i>SOD1</i>    | 0.7092 | 0.7203 | skat   | Nonsynonymous variants and in-frame indels | non-EDS gene |
| <i>DCAF11</i>  | 0.7203 | 0.7293 | calpha | 3' UTR variants                            | non-EDS gene |
| <i>LAMC3</i>   | 0.7213 | 0.7293 | calpha | Nonsynonymous variants and in-frame indels | non-EDS gene |
| <i>DCAF11</i>  | 0.7233 | 0.7297 | calpha | Nonsynonymous variants and in-frame indels | non-EDS gene |
| <i>FASLG</i>   | 0.7293 | 0.7341 | calpha | Nonsynonymous variants and in-frame indels | non-EDS gene |
| <i>DCAF11</i>  | 0.7343 | 0.7374 | calpha | Synonymous variants                        | non-EDS gene |
| <i>LOX</i>     | 0.7398 | 0.7388 | skat   | Nonsynonymous variants and in-frame indels | non-EDS gene |
| <i>SOD1</i>    | 0.7433 | 0.7388 | calpha | Nonsynonymous variants and in-frame indels | non-EDS gene |
| <i>SOD1</i>    | 0.7433 | 0.7388 | kbac   | 5' UTR variants                            | non-EDS gene |
| <i>TNXB</i>    | 0.7447 | 0.7388 | CMC    | Synonymous variants                        | EDS gene     |

|                |        |        |        |                                            |              |
|----------------|--------|--------|--------|--------------------------------------------|--------------|
| <i>LOXHD1</i>  | 0.7452 | 0.7388 | skat   | Intronic variants                          | non-EDS gene |
| <i>LCA5</i>    | 0.7463 | 0.7388 | calpha | Synonymous variants                        | non-EDS gene |
| <i>COL12A1</i> | 0.7473 | 0.7388 | calpha | Nonsynonymous variants and in-frame indels | EDS gene     |
| <i>LOX</i>     | 0.7542 | 0.7441 | vt     | Synonymous variants                        | non-EDS gene |
| <i>LOX</i>     | 0.7582 | 0.7464 | kbac   | 5' UTR variants                            | non-EDS gene |
| <i>COL2A1</i>  | 0.7662 | 0.7503 | CMC    | Synonymous variants                        | non-EDS gene |
| <i>P3H4</i>    | 0.7686 | 0.7503 | skat   | Nonsynonymous variants and in-frame indels | non-EDS gene |
| <i>LCA5</i>    | 0.7707 | 0.7503 | skat   | Synonymous variants                        | non-EDS gene |
| <i>DCAF11</i>  | 0.7707 | 0.7503 | skat   | Intronic variants                          | non-EDS gene |
| <i>PARP1</i>   | 0.7742 | 0.7503 | kbac   | Synonymous variants                        | non-EDS gene |
| <i>LOX</i>     | 0.7749 | 0.7503 | skat   | 5' UTR variants                            | non-EDS gene |
| <i>P3H4</i>    | 0.7765 | 0.7503 | skat   | Synonymous variants                        | non-EDS gene |
| <i>COL2A1</i>  | 0.7772 | 0.7503 | calpha | Synonymous variants                        | non-EDS gene |
| <i>DOCK9</i>   | 0.7791 | 0.7503 | skat   | 5' UTR variants                            | non-EDS gene |
| <i>PARP1</i>   | 0.7792 | 0.7503 | vt     | Synonymous variants                        | non-EDS gene |
| <i>LOX</i>     | 0.7892 | 0.7503 | vt     | 5' UTR variants                            | non-EDS gene |
| <i>LOX</i>     | 0.7902 | 0.7503 | kbac   | Synonymous variants                        | non-EDS gene |
| <i>FNDC3B</i>  | 0.7922 | 0.7503 | skat   | 3' UTR variants                            | non-EDS gene |
| <i>SOD1</i>    | 0.7922 | 0.7503 | skat   | Synonymous variants                        | non-EDS gene |
| <i>IL1RN</i>   | 0.7924 | 0.7503 | skat   | Nonsynonymous variants and in-frame indels | non-EDS gene |
| <i>HLA-G</i>   | 0.7939 | 0.7503 | skat   | Synonymous variants                        | non-EDS gene |
| <i>TF</i>      | 0.7942 | 0.7503 | vt     | Nonsynonymous variants and in-frame indels | non-EDS gene |
| <i>MMP9</i>    | 0.7965 | 0.7503 | skat   | Nonsynonymous variants and in-frame indels | non-EDS gene |
| <i>VSX1</i>    | 0.7969 | 0.7503 | CMC    | Synonymous variants                        | non-EDS gene |
| <i>COL2A1</i>  | 0.7969 | 0.7503 | CMC    | Nonsynonymous variants and in-frame indels | non-EDS gene |
| <i>LCA5</i>    | 0.7984 | 0.7503 | skat   | 3' UTR variants                            | non-EDS gene |
| <i>DOCK1</i>   | 0.7992 | 0.7503 | calpha | 3' UTR variants                            | non-EDS gene |
| <i>TGFBI</i>   | 0.8024 | 0.7517 | skat   | Nonsynonymous variants and in-frame indels | non-EDS gene |
| <i>NLRP1</i>   | 0.8084 | 0.7557 | CMC    | Synonymous variants                        | non-EDS gene |
| <i>SOD1</i>    | 0.8102 | 0.7558 | vt     | 5' UTR variants                            | non-EDS gene |

|                |        |        |        |                                            |              |
|----------------|--------|--------|--------|--------------------------------------------|--------------|
| <i>COL2A1</i>  | 0.815  | 0.7587 | skat   | Nonsynonymous variants and in-frame indels | non-EDS gene |
| <i>NLRP1</i>   | 0.8182 | 0.7588 | CMC    | Intronic variants                          | non-EDS gene |
| <i>FOXO1</i>   | 0.8185 | 0.7588 | skat   | Nonsynonymous variants and in-frame indels | non-EDS gene |
| <i>COL2A1</i>  | 0.8227 | 0.7611 | skat   | Synonymous variants                        | non-EDS gene |
| <i>TF</i>      | 0.8372 | 0.765  | kbac   | Nonsynonymous variants and in-frame indels | non-EDS gene |
| <i>RDH13</i>   | 0.8379 | 0.765  | skat   | Nonsynonymous variants and in-frame indels | non-EDS gene |
| <i>SLC4A11</i> | 0.839  | 0.765  | skat   | Nonsynonymous variants and in-frame indels | non-EDS gene |
| <i>COL2A1</i>  | 0.8432 | 0.765  | calpha | Nonsynonymous variants and in-frame indels | non-EDS gene |
| <i>PRPH2</i>   | 0.8482 | 0.765  | kbac   | 3' UTR variants                            | non-EDS gene |
| <i>PRPH2</i>   | 0.8511 | 0.765  | vt     | Nonsynonymous variants and in-frame indels | non-EDS gene |
| <i>P3H4</i>    | 0.8521 | 0.765  | calpha | Nonsynonymous variants and in-frame indels | non-EDS gene |
| <i>DOCK9</i>   | 0.8531 | 0.765  | vt     | 3' UTR variants                            | non-EDS gene |
| <i>LOX</i>     | 0.8561 | 0.765  | kbac   | 3' UTR variants                            | non-EDS gene |
| <i>PRPH2</i>   | 0.8568 | 0.765  | skat   | Nonsynonymous variants and in-frame indels | non-EDS gene |
| <i>TGFBI</i>   | 0.8571 | 0.765  | calpha | Synonymous variants                        | non-EDS gene |
| <i>LCA5</i>    | 0.8591 | 0.765  | calpha | Intronic variants                          | non-EDS gene |
| <i>PRPH2</i>   | 0.8591 | 0.765  | kbac   | Nonsynonymous variants and in-frame indels | non-EDS gene |
| <i>PRPH2</i>   | 0.8619 | 0.765  | skat   | 3' UTR variants                            | non-EDS gene |
| <i>DOCK9</i>   | 0.8623 | 0.765  | skat   | 3' UTR variants                            | non-EDS gene |
| <i>NLRP1</i>   | 0.8629 | 0.765  | skat   | Nonsynonymous variants and in-frame indels | non-EDS gene |
| <i>DOCK1</i>   | 0.8631 | 0.765  | calpha | Nonsynonymous variants and in-frame indels | non-EDS gene |
| <i>RDH13</i>   | 0.8631 | 0.765  | kbac   | Nonsynonymous variants and in-frame indels | non-EDS gene |
| <i>TNXB</i>    | 0.8647 | 0.765  | skat   | Intronic variants                          | EDS gene     |
| <i>LOX</i>     | 0.8661 | 0.765  | vt     | 3' UTR variants                            | non-EDS gene |
| <i>PARP1</i>   | 0.8664 | 0.765  | skat   | Synonymous variants                        | non-EDS gene |
| <i>PRPH2</i>   | 0.8671 | 0.765  | kbac   | Intronic variants                          | non-EDS gene |
| <i>TF</i>      | 0.8674 | 0.765  | skat   | Nonsynonymous variants and in-frame indels | non-EDS gene |
| <i>PRPH2</i>   | 0.8681 | 0.765  | vt     | 3' UTR variants                            | non-EDS gene |
| <i>ZNF469</i>  | 0.872  | 0.7664 | skat   | Synonymous variants                        | EDS gene     |
| <i>DOCK9</i>   | 0.8731 | 0.7664 | kbac   | 3' UTR variants                            | non-EDS gene |

|                |        |        |        |                                            |              |
|----------------|--------|--------|--------|--------------------------------------------|--------------|
| <i>LOX</i>     | 0.8754 | 0.7669 | skat   | 3' UTR variants                            | non-EDS gene |
| <i>PRPH2</i>   | 0.8851 | 0.7732 | vt     | Intronic variants                          | non-EDS gene |
| <i>RDH13</i>   | 0.8861 | 0.7732 | vt     | Nonsynonymous variants and in-frame indels | non-EDS gene |
| <i>PARP1</i>   | 0.8892 | 0.7744 | skat   | Nonsynonymous variants and in-frame indels | non-EDS gene |
| <i>NLRP1</i>   | 0.8925 | 0.7748 | skat   | Intronic variants                          | non-EDS gene |
| <i>LOX</i>     | 0.8931 | 0.7748 | skat   | Synonymous variants                        | non-EDS gene |
| <i>PARP1</i>   | 0.9    | 0.7787 | skat   | Nonsense and frameshift variants           | non-EDS gene |
| <i>PRPH2</i>   | 0.901  | 0.7787 | skat   | Synonymous variants                        | non-EDS gene |
| <i>SLC4A11</i> | 0.9111 | 0.7853 | calpha | Nonsynonymous variants and in-frame indels | non-EDS gene |
| <i>LAMC3</i>   | 0.9123 | 0.7853 | skat   | Nonsynonymous variants and in-frame indels | non-EDS gene |
| <i>LOX</i>     | 0.9171 | 0.7879 | calpha | Intronic variants                          | non-EDS gene |
| <i>PARP1</i>   | 0.9231 | 0.7916 | vt     | Nonsense and frameshift variants           | non-EDS gene |
| <i>NLRP1</i>   | 0.9311 | 0.7969 | calpha | Intronic variants                          | non-EDS gene |
| <i>LOXHD1</i>  | 0.9421 | 0.8047 | calpha | Intronic variants                          | non-EDS gene |
| <i>PARP1</i>   | 0.9481 | 0.8083 | kbac   | Nonsense and frameshift variants           | non-EDS gene |
| <i>PRPH2</i>   | 0.964  | 0.8093 | kbac   | Synonymous variants                        | non-EDS gene |
| <i>TNXB</i>    | 0.973  | 0.8093 | kbac   | Intronic variants                          | EDS gene     |
| <i>TNXB</i>    | 0.977  | 0.8093 | vt     | Intronic variants                          | EDS gene     |
| <i>PRPH2</i>   | 0.993  | 0.8093 | vt     | Synonymous variants                        | non-EDS gene |
| <i>DOCK9</i>   | 1      | 0.8093 | CMC    | Nonsynonymous variants and in-frame indels | non-EDS gene |
| <i>FASLG</i>   | 1      | 0.8093 | CMC    | Nonsynonymous variants and in-frame indels | non-EDS gene |
| <i>P3H4</i>    | 1      | 0.8093 | CMC    | Nonsynonymous variants and in-frame indels | non-EDS gene |
| <i>SOD1</i>    | 1      | 0.8093 | CMC    | Nonsynonymous variants and in-frame indels | non-EDS gene |
| <i>SLC4A11</i> | 1      | 0.8093 | CMC    | Nonsynonymous variants and in-frame indels | non-EDS gene |
| <i>WNT10A</i>  | 1      | 0.8093 | CMC    | Nonsynonymous variants and in-frame indels | non-EDS gene |
| <i>LOX</i>     | 1      | 0.8093 | CMC    | Nonsense and frameshift variants           | non-EDS gene |
| <i>DOCK1</i>   | 1      | 0.8093 | CMC    | 3' UTR variants                            | non-EDS gene |
| <i>FNDC3B</i>  | 1      | 0.8093 | CMC    | 3' UTR variants                            | non-EDS gene |
| <i>LCA5</i>    | 1      | 0.8093 | CMC    | 3' UTR variants                            | non-EDS gene |
| <i>DOCK9</i>   | 1      | 0.8093 | CMC    | 5' UTR variants                            | non-EDS gene |

|               |   |        |     |                     |              |
|---------------|---|--------|-----|---------------------|--------------|
| <i>FASLG</i>  | 1 | 0.8093 | CMC | 5' UTR variants     | non-EDS gene |
| <i>TF</i>     | 1 | 0.8093 | CMC | 5' UTR variants     | non-EDS gene |
| <i>DCAF11</i> | 1 | 0.8093 | CMC | Intronic variants   | non-EDS gene |
| <i>LOX</i>    | 1 | 0.8093 | CMC | Intronic variants   | non-EDS gene |
| <i>LCA5</i>   | 1 | 0.8093 | CMC | Intronic variants   | non-EDS gene |
| <i>TGFBI</i>  | 1 | 0.8093 | CMC | Intronic variants   | non-EDS gene |
| <i>SOD1</i>   | 1 | 0.8093 | CMC | Intronic variants   | non-EDS gene |
| <i>FOXO1</i>  | 1 | 0.8093 | CMC | Synonymous variants | non-EDS gene |
| <i>HLA-G</i>  | 1 | 0.8093 | CMC | Synonymous variants | non-EDS gene |
| <i>LCA5</i>   | 1 | 0.8093 | CMC | Synonymous variants | non-EDS gene |
| <i>RDH13</i>  | 1 | 0.8093 | CMC | Synonymous variants | non-EDS gene |
| <i>SOD1</i>   | 1 | 0.8093 | CMC | Synonymous variants | non-EDS gene |
| <i>TGFBI</i>  | 1 | 0.8093 | CMC | Synonymous variants | non-EDS gene |

MAF = Minor Allele Frequency; Vt = Variable Thresholds methods; kbac = kernel-based adaptive cluster; CMC = Combined and Multivariate collapsing; skat = SNP-set (Sequence) Kernel Association Method; EDS = Ehlers-Danlos Syndrome. Hg19 was used as reference genome.

**Supplementary table S4 ter:** Results from the gene-based tests, at MAF cutoffs 1% , sorted by significance

| <b>Gene</b>    | <b>p-value</b> | <b>q-value</b> | <b>Test</b> | <b>Variant category</b>                    | <b>EDS gene</b> |
|----------------|----------------|----------------|-------------|--------------------------------------------|-----------------|
| <i>COL5A1</i>  | 7.00E-04       | 0.412          | skat        | Synonymous variant                         | EDS gene        |
| <i>MMP9</i>    | 0.0014         | 0.4276         | kbac        | Intronic variants                          | non-EDS gene    |
| <i>RDH13</i>   | 0.0038         | 0.5282         | kbac        | Intronic variants                          | non-EDS gene    |
| <i>DOCK9</i>   | 0.0056         | 0.5282         | vt          | Synonymous variant                         | non-EDS gene    |
| <i>MMP9</i>    | 0.0067         | 0.5282         | CMC         | Intronic variants                          | non-EDS gene    |
| <i>DOCK9</i>   | 0.0073         | 0.5282         | skat        | Intronic variants                          | non-EDS gene    |
| <i>DOCK9</i>   | 0.0078         | 0.5282         | skat        | Synonymous variant                         | non-EDS gene    |
| <i>COL2A1</i>  | 0.0082         | 0.5282         | vt          | Intronic variants                          | non-EDS gene    |
| <i>MMP9</i>    | 0.011          | 0.5282         | vt          | Intronic variants                          | non-EDS gene    |
| <i>ZNF469</i>  | 0.0119         | 0.5282         | skat        | Nonsynonymous variants and in-frame indels | EDS gene        |
| <i>COL12A1</i> | 0.0123         | 0.5282         | skat        | Synonymous variant                         | EDS gene        |
| <i>DOCK9</i>   | 0.0126         | 0.5282         | calpha      | Synonymous variant                         | non-EDS gene    |
| <i>RDH13</i>   | 0.013          | 0.5282         | CMC         | Intronic variants                          | non-EDS gene    |
| <i>FNDC3B</i>  | 0.0132         | 0.5282         | kbac        | Intronic variants                          | non-EDS gene    |
| <i>ZEB1</i>    | 0.0144         | 0.5282         | kbac        | Synonymous variant                         | non-EDS gene    |
| <i>DOCK9</i>   | 0.015          | 0.5282         | kbac        | Synonymous variant                         | non-EDS gene    |
| <i>DOCK9</i>   | 0.0155         | 0.5282         | CMC         | Synonymous variant                         | non-EDS gene    |
| <i>FNDC3B</i>  | 0.0189         | 0.5282         | skat        | Nonsynonymous variants and in-frame indels | non-EDS gene    |
| <i>RDH13</i>   | 0.0212         | 0.5282         | vt          | Intronic variants                          | non-EDS gene    |
| <i>TF</i>      | 0.0214         | 0.5282         | calpha      | Synonymous variant                         | non-EDS gene    |
| <i>SOD1</i>    | 0.0216         | 0.5282         | calpha      | 5' UTR variants                            | non-EDS gene    |
| <i>TF</i>      | 0.0225         | 0.5282         | skat        | Synonymous variant                         | non-EDS gene    |
| <i>LCA5</i>    | 0.0229         | 0.5282         | skat        | Intronic variants                          | non-EDS gene    |
| <i>COL12A1</i> | 0.0238         | 0.5282         | vt          | Intronic variants                          | EDS gene        |
| <i>PARP2</i>   | 0.0241         | 0.5282         | skat        | Nonsynonymous variants and in-frame indels | non-EDS gene    |
| <i>RDH13</i>   | 0.0245         | 0.5282         | skat        | Intronic variants                          | non-EDS gene    |
| <i>P3H4</i>    | 0.025          | 0.5282         | vt          | Synonymous variant                         | non-EDS gene    |
| <i>FNDC3B</i>  | 0.0252         | 0.5282         | vt          | Intronic variants                          | non-EDS gene    |

|               |        |        |        |                                            |              |
|---------------|--------|--------|--------|--------------------------------------------|--------------|
| <i>LCA5</i>   | 0.0253 | 0.5282 | skat   | Nonsynonymous variants and in-frame indels | non-EDS gene |
| <i>FNDC3B</i> | 0.028  | 0.5282 | kbac   | Nonsynonymous variants and in-frame indels | non-EDS gene |
| <i>TNXB</i>   | 0.0283 | 0.5282 | CMC    | Intronic variants                          | EDS gene     |
| <i>LCA5</i>   | 0.0286 | 0.5282 | calpha | Intronic variants                          | non-EDS gene |
| <i>LCA5</i>   | 0.0288 | 0.5282 | kbac   | Nonsynonymous variants and in-frame indels | non-EDS gene |
| <i>RDH13</i>  | 0.0294 | 0.5282 | calpha | Intronic variants                          | non-EDS gene |
| <i>HLA-G</i>  | 0.031  | 0.5328 | skat   | Intronic variants                          | non-EDS gene |
| <i>ZEB1</i>   | 0.0314 | 0.5328 | kbac   | Intronic variants                          | non-EDS gene |
| <i>FNDC3B</i> | 0.0329 | 0.5439 | CMC    | Intronic variants                          | non-EDS gene |
| <i>PARP2</i>  | 0.035  | 0.5627 | vt     | Synonymous variant                         | non-EDS gene |
| <i>ZEB1</i>   | 0.0364 | 0.57   | CMC    | Synonymous variant                         | non-EDS gene |
| <i>IL1RN</i>  | 0.0386 | 0.5702 | kbac   | Synonymous variant                         | non-EDS gene |
| <i>TF</i>     | 0.04   | 0.5702 | vt     | Synonymous variant                         | non-EDS gene |
| <i>IL1RN</i>  | 0.0404 | 0.5702 | vt     | Synonymous variant                         | non-EDS gene |
| <i>COL5A1</i> | 0.0409 | 0.5702 | skat   | Intronic variants                          | EDS gene     |
| <i>LCA5</i>   | 0.0422 | 0.5702 | vt     | Nonsynonymous variants and in-frame indels | non-EDS gene |
| <i>ZEB1</i>   | 0.0428 | 0.5702 | vt     | Synonymous variant                         | non-EDS gene |
| <i>PARP2</i>  | 0.043  | 0.5702 | kbac   | Nonsynonymous variants and in-frame indels | non-EDS gene |
| <i>TNXB</i>   | 0.0446 | 0.5702 | calpha | Intronic variants                          | EDS gene     |
| <i>PARP1</i>  | 0.0448 | 0.5702 | calpha | Synonymous variant                         | non-EDS gene |
| <i>LOX</i>    | 0.05   | 0.5728 | kbac   | Nonsynonymous variants and in-frame indels | non-EDS gene |
| <i>TNXB</i>   | 0.0502 | 0.5728 | calpha | Nonsynonymous variants and in-frame indels | EDS gene     |
| <i>TNXB</i>   | 0.0502 | 0.5728 | calpha | Nonsynonymous variants and in-frame indels | EDS gene     |
| <i>PRPH2</i>  | 0.0504 | 0.5728 | calpha | Synonymous variant                         | non-EDS gene |
| <i>MMP9</i>   | 0.052  | 0.5728 | skat   | Synonymous variant                         | non-EDS gene |
| <i>PARP2</i>  | 0.0538 | 0.5728 | kbac   | Synonymous variant                         | non-EDS gene |
| <i>ZEB1</i>   | 0.054  | 0.5728 | kbac   | Nonsynonymous variants and in-frame indels | non-EDS gene |
| <i>TNXB</i>   | 0.0545 | 0.5728 | skat   | Nonsynonymous variants and in-frame indels | EDS gene     |
| <i>RDH13</i>  | 0.0558 | 0.5728 | skat   | Nonsense and frameshift variants           | non-EDS gene |
| <i>ZEB1</i>   | 0.0562 | 0.5728 | vt     | Intronic variants                          | non-EDS gene |



|                |        |        |        |                                            |              |
|----------------|--------|--------|--------|--------------------------------------------|--------------|
| <i>PARP1</i>   | 0.0591 | 0.5728 | CMC    | Synonymous variant                         | non-EDS gene |
| <i>ZEB1</i>    | 0.0605 | 0.5728 | skat   | Synonymous variant                         | non-EDS gene |
| <i>COL12A1</i> | 0.0606 | 0.5728 | kbac   | Synonymous variant                         | EDS gene     |
| <i>SOD1</i>    | 0.0628 | 0.5728 | skat   | Intronic variants                          | non-EDS gene |
| <i>WNT10A</i>  | 0.0632 | 0.5728 | calpha | Nonsynonymous variants and in-frame indels | non-EDS gene |
| <i>WNT10A</i>  | 0.0632 | 0.5728 | calpha | Nonsynonymous variants and in-frame indels | non-EDS gene |
| <i>HLA-G</i>   | 0.0636 | 0.5728 | calpha | Intronic variants                          | non-EDS gene |
| <i>DOCK1</i>   | 0.0648 | 0.5728 | vt     | Synonymous variant                         | non-EDS gene |
| <i>SOD1</i>    | 0.0662 | 0.5728 | calpha | Intronic variants                          | non-EDS gene |
| <i>LCA5</i>    | 0.0674 | 0.5728 | CMC    | Intronic variants                          | non-EDS gene |
| <i>IL1RN</i>   | 0.068  | 0.5728 | vt     | Nonsynonymous variants and in-frame indels | non-EDS gene |
| <i>P3H4</i>    | 0.0684 | 0.5728 | kbac   | Synonymous variant                         | non-EDS gene |
| <i>SLC4A11</i> | 0.0688 | 0.5728 | skat   | 5' UTR variants                            | non-EDS gene |
| <i>IL1RN</i>   | 0.069  | 0.5728 | kbac   | Nonsynonymous variants and in-frame indels | non-EDS gene |
| <i>COL2A1</i>  | 0.07   | 0.5728 | vt     | Synonymous variant                         | non-EDS gene |
| <i>PARP1</i>   | 0.0712 | 0.5728 | skat   | Synonymous variant                         | non-EDS gene |
| <i>PRPH2</i>   | 0.0715 | 0.5728 | CMC    | Synonymous variant                         | non-EDS gene |
| <i>ZEB1</i>    | 0.0716 | 0.5728 | calpha | Intronic variants                          | non-EDS gene |
| <i>RDH13</i>   | 0.0722 | 0.5728 | calpha | Nonsense and frameshift variants           | non-EDS gene |
| <i>COL12A1</i> | 0.0736 | 0.5764 | kbac   | Intronic variants                          | EDS gene     |
| <i>MMP9</i>    | 0.0762 | 0.5833 | calpha | Intronic variants                          | non-EDS gene |
| <i>LOX</i>     | 0.077  | 0.5833 | vt     | Nonsynonymous variants and in-frame indels | non-EDS gene |
| <i>SLC4A11</i> | 0.0793 | 0.5833 | skat   | 3' UTR variants                            | non-EDS gene |
| <i>COL5A1</i>  | 0.0796 | 0.5833 | calpha | Synonymous variant                         | EDS gene     |
| <i>VSX1</i>    | 0.0806 | 0.5833 | vt     | Intronic variants                          | non-EDS gene |
| <i>DOCK9</i>   | 0.0846 | 0.5833 | kbac   | Intronic variants                          | non-EDS gene |
| <i>FNDC3B</i>  | 0.085  | 0.5833 | vt     | Synonymous variant                         | non-EDS gene |
| <i>COL2A1</i>  | 0.086  | 0.5833 | kbac   | Intronic variants                          | non-EDS gene |
| <i>P3H4</i>    | 0.087  | 0.5833 | CMC    | Synonymous variant                         | non-EDS gene |
| <i>IL1RN</i>   | 0.0888 | 0.5833 | vt     | Intronic variants                          | non-EDS gene |

|                |        |        |        |                                            |              |
|----------------|--------|--------|--------|--------------------------------------------|--------------|
| <i>FNDC3B</i>  | 0.0914 | 0.5833 | vt     | Nonsynonymous variants and in-frame indels | non-EDS gene |
| <i>WNT10A</i>  | 0.0924 | 0.5833 | kbac   | Nonsynonymous variants and in-frame indels | non-EDS gene |
| <i>COL5A1</i>  | 0.0944 | 0.5833 | vt     | Intronic variants                          | EDS gene     |
| <i>IL1RN</i>   | 0.0962 | 0.5833 | CMC    | Synonymous variant                         | non-EDS gene |
| <i>PARP2</i>   | 0.0962 | 0.5833 | CMC    | Synonymous variant                         | non-EDS gene |
| <i>ZEB1</i>    | 0.0971 | 0.5833 | CMC    | Nonsynonymous variants and in-frame indels | non-EDS gene |
| <i>WNT10A</i>  | 0.0971 | 0.5833 | skat   | 5' UTR variants                            | non-EDS gene |
| <i>IL1RN</i>   | 0.0992 | 0.5833 | kbac   | Intronic variants                          | non-EDS gene |
| <i>TGFBI</i>   | 0.0992 | 0.5833 | vt     | Nonsynonymous variants and in-frame indels | non-EDS gene |
| <i>SLC4A11</i> | 0.0994 | 0.5833 | calpha | 5' UTR variants                            | non-EDS gene |
| <i>COL12A1</i> | 0.1004 | 0.5833 | vt     | Synonymous variant                         | EDS gene     |
| <i>SOD1</i>    | 0.1012 | 0.5833 | skat   | 5' UTR variants                            | non-EDS gene |
| <i>PARP2</i>   | 0.1014 | 0.5833 | calpha | Synonymous variant                         | non-EDS gene |
| <i>ZEB1</i>    | 0.1014 | 0.5833 | calpha | Synonymous variant                         | non-EDS gene |
| <i>COL12A1</i> | 0.1015 | 0.5833 | CMC    | Intronic variants                          | EDS gene     |
| <i>COL2A1</i>  | 0.1023 | 0.5833 | CMC    | Intronic variants                          | non-EDS gene |
| <i>SLC4A11</i> | 0.1036 | 0.5833 | kbac   | 5' UTR variants                            | non-EDS gene |
| <i>COL12A1</i> | 0.1042 | 0.5833 | skat   | Nonsynonymous variants and in-frame indels | EDS gene     |
| <i>IL1RN</i>   | 0.1058 | 0.5833 | CMC    | Nonsynonymous variants and in-frame indels | non-EDS gene |
| <i>LCA5</i>    | 0.1058 | 0.5833 | CMC    | Nonsynonymous variants and in-frame indels | non-EDS gene |
| <i>SLC4A11</i> | 0.1062 | 0.5833 | vt     | 5' UTR variants                            | non-EDS gene |
| <i>FOXO1</i>   | 0.1076 | 0.5833 | vt     | Nonsynonymous variants and in-frame indels | non-EDS gene |
| <i>MMP9</i>    | 0.1082 | 0.5833 | skat   | Intronic variants                          | non-EDS gene |
| <i>DOCK9</i>   | 0.1088 | 0.5833 | vt     | Intronic variants                          | non-EDS gene |
| <i>ZEB1</i>    | 0.1104 | 0.5833 | CMC    | Intronic variants                          | non-EDS gene |
| <i>TNXB</i>    | 0.112  | 0.5833 | vt     | Nonsynonymous variants and in-frame indels | EDS gene     |
| <i>DOCK1</i>   | 0.1148 | 0.5833 | skat   | 5' UTR variants                            | non-EDS gene |
| <i>IL1RN</i>   | 0.115  | 0.5833 | skat   | Intronic variants                          | non-EDS gene |
| <i>VSX1</i>    | 0.116  | 0.5833 | kbac   | Intronic variants                          | non-EDS gene |
| <i>LOX</i>     | 0.1174 | 0.5833 | calpha | Nonsynonymous variants and in-frame indels | non-EDS gene |

|                |        |        |        |                                            |              |
|----------------|--------|--------|--------|--------------------------------------------|--------------|
| <i>LOX</i>     | 0.1174 | 0.5833 | calpha | Nonsynonymous variants and in-frame indels | non-EDS gene |
| <i>DOCK1</i>   | 0.1184 | 0.5833 | CMC    | Synonymous variant                         | non-EDS gene |
| <i>TF</i>      | 0.1191 | 0.5833 | CMC    | Nonsynonymous variants and in-frame indels | non-EDS gene |
| <i>FNDC3B</i>  | 0.1209 | 0.5833 | CMC    | Nonsynonymous variants and in-frame indels | non-EDS gene |
| <i>COL5A3</i>  | 0.1214 | 0.5833 | skat   | 3' UTR variants                            | non-EDS gene |
| <i>HLA-G</i>   | 0.1219 | 0.5833 | calpha | Nonsynonymous variants and in-frame indels | non-EDS gene |
| <i>HLA-G</i>   | 0.1219 | 0.5833 | calpha | Nonsynonymous variants and in-frame indels | non-EDS gene |
| <i>DOCK1</i>   | 0.1219 | 0.5833 | kbac   | Synonymous variant                         | non-EDS gene |
| <i>ZEB1</i>    | 0.1239 | 0.5833 | vt     | Nonsynonymous variants and in-frame indels | non-EDS gene |
| <i>NLRP1</i>   | 0.1241 | 0.5833 | skat   | 3' UTR variants                            | non-EDS gene |
| <i>DCAF11</i>  | 0.1249 | 0.5833 | kbac   | 3' UTR variants                            | non-EDS gene |
| <i>COL12A1</i> | 0.1249 | 0.5833 | skat   | Intronic variants                          | EDS gene     |
| <i>MIR184</i>  | 0.1268 | 0.5833 | skat   | noncoding RNA 5'                           | non-EDS gene |
| <i>DOCK9</i>   | 0.1269 | 0.5833 | calpha | Intronic variants                          | non-EDS gene |
| <i>HLA-G</i>   | 0.127  | 0.5833 | skat   | Nonsynonymous variants and in-frame indels | non-EDS gene |
| <i>NLRP1</i>   | 0.1289 | 0.5876 | kbac   | 3' UTR variants                            | non-EDS gene |
| <i>TNXB</i>    | 0.1329 | 0.6013 | calpha | Synonymous variant                         | EDS gene     |
| <i>MMP9</i>    | 0.1359 | 0.6104 | kbac   | Synonymous variant                         | non-EDS gene |
| <i>VSX1</i>    | 0.1369 | 0.6104 | vt     | Nonsynonymous variants and in-frame indels | non-EDS gene |
| <i>COL5A3</i>  | 0.1383 | 0.6123 | skat   | Nonsynonymous variants and in-frame indels | non-EDS gene |
| <i>COL5A1</i>  | 0.1419 | 0.6227 | calpha | Intronic variants                          | EDS gene     |
| <i>ZEB1</i>    | 0.1427 | 0.6227 | skat   | Intronic variants                          | non-EDS gene |
| <i>TF</i>      | 0.1439 | 0.6234 | kbac   | Synonymous variant                         | non-EDS gene |
| <i>FNDC3B</i>  | 0.1456 | 0.6265 | skat   | Intronic variants                          | non-EDS gene |
| <i>RDH13</i>   | 0.1498 | 0.6383 | skat   | 5' UTR variants                            | non-EDS gene |
| <i>TNXB</i>    | 0.1504 | 0.6383 | skat   | Nonsense and frameshift variants           | EDS gene     |
| <i>RDH13</i>   | 0.1518 | 0.6399 | vt     | Nonsense and frameshift variants           | non-EDS gene |
| <i>NLRP1</i>   | 0.1548 | 0.6467 | calpha | 3' UTR variants                            | non-EDS gene |
| <i>WNT10A</i>  | 0.1556 | 0.6467 | skat   | Synonymous variant                         | non-EDS gene |
| <i>PARP1</i>   | 0.1568 | 0.6475 | calpha | Nonsense and frameshift variants           | non-EDS gene |

|                |        |        |        |                                            |              |
|----------------|--------|--------|--------|--------------------------------------------|--------------|
| <i>COL5A1</i>  | 0.1588 | 0.6514 | kbac   | Intronic variants                          | EDS gene     |
| <i>IL1RN</i>   | 0.1628 | 0.654  | calpha | Nonsynonymous variants and in-frame indels | non-EDS gene |
| <i>IL1RN</i>   | 0.1628 | 0.654  | calpha | Nonsynonymous variants and in-frame indels | non-EDS gene |
| <i>LOX</i>     | 0.1636 | 0.654  | CMC    | Nonsynonymous variants and in-frame indels | non-EDS gene |
| <i>TNXB</i>    | 0.1638 | 0.654  | skat   | Synonymous variant                         | EDS gene     |
| <i>HLA-G</i>   | 0.1668 | 0.6573 | kbac   | Nonsynonymous variants and in-frame indels | non-EDS gene |
| <i>PARP2</i>   | 0.1678 | 0.6573 | calpha | Nonsynonymous variants and in-frame indels | non-EDS gene |
| <i>PARP2</i>   | 0.1678 | 0.6573 | calpha | Nonsynonymous variants and in-frame indels | non-EDS gene |
| <i>TNXB</i>    | 0.1708 | 0.661  | kbac   | Nonsynonymous variants and in-frame indels | EDS gene     |
| <i>FOXO1</i>   | 0.1718 | 0.661  | kbac   | Nonsynonymous variants and in-frame indels | non-EDS gene |
| <i>DCAF11</i>  | 0.172  | 0.661  | skat   | Nonsynonymous variants and in-frame indels | non-EDS gene |
| <i>FOXO1</i>   | 0.1788 | 0.6649 | calpha | Synonymous variant                         | non-EDS gene |
| <i>MMP9</i>    | 0.1798 | 0.6649 | vt     | Synonymous variant                         | non-EDS gene |
| <i>PARP1</i>   | 0.1804 | 0.6649 | skat   | Intronic variants                          | non-EDS gene |
| <i>COL2A1</i>  | 0.1818 | 0.6649 | kbac   | Synonymous variant                         | non-EDS gene |
| <i>HLA-G</i>   | 0.1838 | 0.6649 | vt     | Intronic variants                          | non-EDS gene |
| <i>ZEB1</i>    | 0.1842 | 0.6649 | skat   | Nonsense and frameshift variants           | non-EDS gene |
| <i>IL1RN</i>   | 0.1843 | 0.6649 | skat   | 5' UTR variants                            | non-EDS gene |
| <i>VSX1</i>    | 0.1853 | 0.6649 | skat   | Nonsense and frameshift variants           | non-EDS gene |
| <i>IL1RN</i>   | 0.1858 | 0.6649 | calpha | Intronic variants                          | non-EDS gene |
| <i>FASLG</i>   | 0.1863 | 0.6649 | skat   | Intronic variants                          | non-EDS gene |
| <i>COL12A1</i> | 0.1864 | 0.6649 | skat   | Nonsense and frameshift variants           | EDS gene     |
| <i>LAMC3</i>   | 0.1868 | 0.6649 | vt     | Nonsynonymous variants and in-frame indels | non-EDS gene |
| <i>FASLG</i>   | 0.1876 | 0.6649 | skat   | Synonymous variant                         | non-EDS gene |
| <i>COL5A3</i>  | 0.1928 | 0.6649 | calpha | Nonsynonymous variants and in-frame indels | non-EDS gene |
| <i>COL5A3</i>  | 0.1928 | 0.6649 | calpha | Nonsynonymous variants and in-frame indels | non-EDS gene |
| <i>LCA5</i>    | 0.1938 | 0.6649 | calpha | Nonsynonymous variants and in-frame indels | non-EDS gene |
| <i>LCA5</i>    | 0.1938 | 0.6649 | calpha | Nonsynonymous variants and in-frame indels | non-EDS gene |
| <i>DOCK9</i>   | 0.1941 | 0.6649 | skat   | Nonsynonymous variants and in-frame indels | non-EDS gene |
| <i>DCAF11</i>  | 0.1948 | 0.6649 | kbac   | Synonymous variant                         | non-EDS gene |

|                |        |        |        |                                            |              |
|----------------|--------|--------|--------|--------------------------------------------|--------------|
| <i>P3H4</i>    | 0.1948 | 0.6649 | vt     | Intronic variants                          | non-EDS gene |
| <i>PARP2</i>   | 0.1997 | 0.6741 | CMC    | Nonsynonymous variants and in-frame indels | non-EDS gene |
| <i>WNT10A</i>  | 0.1998 | 0.6741 | skat   | Nonsynonymous variants and in-frame indels | non-EDS gene |
| <i>COL5A3</i>  | 0.2008 | 0.6741 | kbac   | Synonymous variant                         | non-EDS gene |
| <i>SLC4A11</i> | 0.2029 | 0.6776 | CMC    | 5' UTR variants                            | non-EDS gene |
| <i>P3H4</i>    | 0.2048 | 0.6801 | calpha | Synonymous variant                         | non-EDS gene |
| <i>FOXO1</i>   | 0.2089 | 0.6855 | skat   | Synonymous variant                         | non-EDS gene |
| <i>NLRP1</i>   | 0.2094 | 0.6855 | skat   | Nonsense and frameshift variants           | non-EDS gene |
| <i>FOXO1</i>   | 0.2098 | 0.6855 | kbac   | Synonymous variant                         | non-EDS gene |
| <i>COL12A1</i> | 0.2228 | 0.7196 | calpha | Intronic variants                          | EDS gene     |
| <i>IL1RN</i>   | 0.2228 | 0.7196 | calpha | Synonymous variant                         | non-EDS gene |
| <i>DOCK1</i>   | 0.2238 | 0.7196 | vt     | Intronic variants                          | non-EDS gene |
| <i>COL5A3</i>  | 0.23   | 0.7357 | CMC    | 3' UTR variants                            | non-EDS gene |
| <i>MIR184</i>  | 0.233  | 0.7413 | CMC    | noncoding RNA 5'                           | non-EDS gene |
| <i>FNDC3B</i>  | 0.2358 | 0.7425 | calpha | Nonsynonymous variants and in-frame indels | non-EDS gene |
| <i>FNDC3B</i>  | 0.2358 | 0.7425 | calpha | Nonsynonymous variants and in-frame indels | non-EDS gene |
| <i>FOXO1</i>   | 0.2378 | 0.745  | vt     | Synonymous variant                         | non-EDS gene |
| <i>RDH13</i>   | 0.2398 | 0.746  | kbac   | Nonsense and frameshift variants           | non-EDS gene |
| <i>TNXB</i>    | 0.2414 | 0.746  | CMC    | Synonymous variant                         | EDS gene     |
| <i>VSX1</i>    | 0.2418 | 0.746  | calpha | Intronic variants                          | non-EDS gene |
| <i>VSX1</i>    | 0.2465 | 0.7476 | skat   | 3' UTR variants                            | non-EDS gene |
| <i>TF</i>      | 0.2468 | 0.7476 | vt     | Intronic variants                          | non-EDS gene |
| <i>P3H4</i>    | 0.2488 | 0.7476 | kbac   | Intronic variants                          | non-EDS gene |
| <i>DOCK1</i>   | 0.2498 | 0.7476 | kbac   | Intronic variants                          | non-EDS gene |
| <i>FOXO1</i>   | 0.2507 | 0.7476 | calpha | Nonsynonymous variants and in-frame indels | non-EDS gene |
| <i>FOXO1</i>   | 0.2507 | 0.7476 | calpha | Nonsynonymous variants and in-frame indels | non-EDS gene |
| <i>PARP1</i>   | 0.2508 | 0.7476 | CMC    | Nonsense and frameshift variants           | non-EDS gene |
| <i>MMP9</i>    | 0.2557 | 0.7585 | calpha | Synonymous variant                         | non-EDS gene |
| <i>DCAF11</i>  | 0.2577 | 0.7594 | calpha | 3' UTR variants                            | non-EDS gene |
| <i>IL1RN</i>   | 0.2586 | 0.7594 | skat   | Synonymous variant                         | non-EDS gene |

|                |        |        |        |                                            |              |
|----------------|--------|--------|--------|--------------------------------------------|--------------|
| <i>WNT10A</i>  | 0.2598 | 0.7594 | CMC    | Nonsynonymous variants and in-frame indels | non-EDS gene |
| <i>COL5A1</i>  | 0.2627 | 0.7641 | kbac   | Synonymous variant                         | EDS gene     |
| <i>COL2A1</i>  | 0.2646 | 0.7641 | CMC    | Synonymous variant                         | non-EDS gene |
| <i>DCAF11</i>  | 0.2667 | 0.7641 | calpha | Intronic variants                          | non-EDS gene |
| <i>VSX1</i>    | 0.267  | 0.7641 | skat   | Intronic variants                          | non-EDS gene |
| <i>DCAF11</i>  | 0.2687 | 0.7641 | calpha | Nonsynonymous variants and in-frame indels | non-EDS gene |
| <i>FOXO1</i>   | 0.2701 | 0.7641 | CMC    | Nonsynonymous variants and in-frame indels | non-EDS gene |
| <i>IL1RN</i>   | 0.2701 | 0.7641 | CMC    | Intronic variants                          | non-EDS gene |
| <i>PARP2</i>   | 0.2737 | 0.7699 | vt     | Nonsynonymous variants and in-frame indels | non-EDS gene |
| <i>PARP2</i>   | 0.2767 | 0.7699 | kbac   | Intronic variants                          | non-EDS gene |
| <i>DCAF11</i>  | 0.2786 | 0.7699 | skat   | 3' UTR variants                            | non-EDS gene |
| <i>MMP9</i>    | 0.2797 | 0.7699 | calpha | Nonsynonymous variants and in-frame indels | non-EDS gene |
| <i>MMP9</i>    | 0.2797 | 0.7699 | calpha | Nonsynonymous variants and in-frame indels | non-EDS gene |
| <i>DCAF11</i>  | 0.2797 | 0.7699 | vt     | Nonsynonymous variants and in-frame indels | non-EDS gene |
| <i>COL12A1</i> | 0.2887 | 0.77   | calpha | Synonymous variant                         | EDS gene     |
| <i>DCAF11</i>  | 0.2887 | 0.77   | kbac   | Intronic variants                          | non-EDS gene |
| <i>DOCK9</i>   | 0.2897 | 0.77   | calpha | Nonsynonymous variants and in-frame indels | non-EDS gene |
| <i>DOCK9</i>   | 0.2897 | 0.77   | calpha | Nonsynonymous variants and in-frame indels | non-EDS gene |
| <i>ZNF469</i>  | 0.2897 | 0.77   | calpha | Synonymous variant                         | EDS gene     |
| <i>PARP1</i>   | 0.2897 | 0.77   | vt     | Nonsynonymous variants and in-frame indels | non-EDS gene |
| <i>FNDC3B</i>  | 0.2917 | 0.77   | kbac   | Synonymous variant                         | non-EDS gene |
| <i>COL12A1</i> | 0.2926 | 0.77   | CMC    | Synonymous variant                         | EDS gene     |
| <i>LOXHD1</i>  | 0.2927 | 0.77   | vt     | Synonymous variant                         | non-EDS gene |
| <i>DCAF11</i>  | 0.293  | 0.77   | CMC    | 3' UTR variants                            | non-EDS gene |
| <i>SOD1</i>    | 0.2936 | 0.77   | CMC    | 5' UTR variants                            | non-EDS gene |
| <i>ZEB1</i>    | 0.3007 | 0.7818 | calpha | Nonsynonymous variants and in-frame indels | non-EDS gene |
| <i>ZEB1</i>    | 0.3007 | 0.7818 | calpha | Nonsynonymous variants and in-frame indels | non-EDS gene |
| <i>DOCK1</i>   | 0.3078 | 0.797  | skat   | Nonsynonymous variants and in-frame indels | non-EDS gene |
| <i>DCAF11</i>  | 0.3107 | 0.801  | vt     | 3' UTR variants                            | non-EDS gene |
| <i>MMP9</i>    | 0.3127 | 0.8027 | kbac   | Nonsynonymous variants and in-frame indels | non-EDS gene |

|                |        |        |        |                                            |              |
|----------------|--------|--------|--------|--------------------------------------------|--------------|
| <i>COL5A3</i>  | 0.3217 | 0.8224 | vt     | Nonsynonymous variants and in-frame indels | non-EDS gene |
| <i>SLC4A11</i> | 0.3257 | 0.8291 | calpha | Nonsense and frameshift variants           | non-EDS gene |
| <i>HLA-G</i>   | 0.3357 | 0.851  | kbac   | Synonymous variant                         | non-EDS gene |
| <i>P3H4</i>    | 0.3392 | 0.854  | skat   | Synonymous variant                         | non-EDS gene |
| <i>TGFBI</i>   | 0.3397 | 0.854  | kbac   | Nonsynonymous variants and in-frame indels | non-EDS gene |
| <i>COL5A3</i>  | 0.3476 | 0.8703 | skat   | Synonymous variant                         | non-EDS gene |
| <i>COL2A1</i>  | 0.3499 | 0.8726 | skat   | Synonymous variant                         | non-EDS gene |
| <i>LOXHD1</i>  | 0.3526 | 0.8744 | vt     | Nonsynonymous variants and in-frame indels | non-EDS gene |
| <i>RDH13</i>   | 0.3536 | 0.8744 | calpha | Synonymous variant                         | non-EDS gene |
| <i>MMP9</i>    | 0.3549 | 0.8744 | CMC    | Synonymous variant                         | non-EDS gene |
| <i>DCAF11</i>  | 0.3579 | 0.8768 | skat   | Intronic variants                          | non-EDS gene |
| <i>PARP1</i>   | 0.3596 | 0.8768 | calpha | Intronic variants                          | non-EDS gene |
| <i>COL2A1</i>  | 0.3606 | 0.8768 | calpha | Intronic variants                          | non-EDS gene |
| <i>HLA-G</i>   | 0.3616 | 0.8768 | kbac   | Intronic variants                          | non-EDS gene |
| <i>PRPH2</i>   | 0.3646 | 0.8795 | calpha | 3' UTR variants                            | non-EDS gene |
| <i>TF</i>      | 0.3656 | 0.8795 | kbac   | Intronic variants                          | non-EDS gene |
| <i>WNT10A</i>  | 0.3685 | 0.8798 | CMC    | 5' UTR variants                            | non-EDS gene |
| <i>DCAF11</i>  | 0.3686 | 0.8798 | vt     | Synonymous variant                         | non-EDS gene |
| <i>TF</i>      | 0.374  | 0.8892 | skat   | Intronic variants                          | non-EDS gene |
| <i>LAMC3</i>   | 0.3766 | 0.8919 | kbac   | Intronic variants                          | non-EDS gene |
| <i>LOX</i>     | 0.3836 | 0.9    | calpha | 3' UTR variants                            | non-EDS gene |
| <i>NLRP1</i>   | 0.3836 | 0.9    | calpha | Synonymous variant                         | non-EDS gene |
| <i>DCAF11</i>  | 0.3856 | 0.9    | vt     | Intronic variants                          | non-EDS gene |
| <i>SLC4A11</i> | 0.3893 | 0.9    | CMC    | Nonsynonymous variants and in-frame indels | non-EDS gene |
| <i>WNT10A</i>  | 0.3896 | 0.9    | vt     | Nonsynonymous variants and in-frame indels | non-EDS gene |
| <i>FNDC3B</i>  | 0.3906 | 0.9    | calpha | Intronic variants                          | non-EDS gene |
| <i>LOXHD1</i>  | 0.394  | 0.9    | skat   | 5' UTR variants                            | non-EDS gene |
| <i>DOCK9</i>   | 0.3976 | 0.9    | calpha | 3' UTR variants                            | non-EDS gene |
| <i>LAMC3</i>   | 0.3978 | 0.9    | skat   | Synonymous variant                         | non-EDS gene |
| <i>PRPH2</i>   | 0.3986 | 0.9    | calpha | Intronic variants                          | non-EDS gene |

|                |        |        |        |                                            |              |
|----------------|--------|--------|--------|--------------------------------------------|--------------|
| <i>COL5A3</i>  | 0.3986 | 0.9    | vt     | Synonymous variant                         | non-EDS gene |
| <i>PARP2</i>   | 0.4001 | 0.9    | CMC    | Intronic variants                          | non-EDS gene |
| <i>LOXHD1</i>  | 0.4006 | 0.9    | vt     | Nonsense and frameshift variants           | non-EDS gene |
| <i>DOCK1</i>   | 0.4017 | 0.9    | CMC    | Intronic variants                          | non-EDS gene |
| <i>IL1RN</i>   | 0.4036 | 0.9    | skat   | Nonsynonymous variants and in-frame indels | non-EDS gene |
| <i>DOCK1</i>   | 0.4036 | 0.9    | CMC    | 5' UTR variants                            | non-EDS gene |
| <i>RDH13</i>   | 0.4108 | 0.9075 | CMC    | Nonsynonymous variants and in-frame indels | non-EDS gene |
| <i>EPPK1</i>   | 0.4194 | 0.9075 | CMC    | Nonsynonymous variants and in-frame indels | non-EDS gene |
| <i>PARP1</i>   | 0.4206 | 0.9075 | kbac   | Intronic variants                          | non-EDS gene |
| <i>COL5A1</i>  | 0.4212 | 0.9075 | CMC    | Intronic variants                          | EDS gene     |
| <i>SLC4A11</i> | 0.4256 | 0.9075 | calpha | Nonsynonymous variants and in-frame indels | non-EDS gene |
| <i>SLC4A11</i> | 0.4256 | 0.9075 | calpha | Nonsynonymous variants and in-frame indels | non-EDS gene |
| <i>LOXHD1</i>  | 0.4266 | 0.9075 | kbac   | Nonsense and frameshift variants           | non-EDS gene |
| <i>TF</i>      | 0.4276 | 0.9075 | calpha | Intronic variants                          | non-EDS gene |
| <i>HLA-G</i>   | 0.4276 | 0.9075 | CMC    | Intronic variants                          | non-EDS gene |
| <i>EPPK1</i>   | 0.4307 | 0.9075 | CMC    | Synonymous variant                         | non-EDS gene |
| <i>P3H4</i>    | 0.4326 | 0.9075 | calpha | Nonsynonymous variants and in-frame indels | non-EDS gene |
| <i>P3H4</i>    | 0.4326 | 0.9075 | calpha | Nonsynonymous variants and in-frame indels | non-EDS gene |
| <i>NLRP1</i>   | 0.4348 | 0.9075 | CMC    | 3' UTR variants                            | non-EDS gene |
| <i>DCAF11</i>  | 0.4352 | 0.9075 | skat   | Synonymous variant                         | non-EDS gene |
| <i>SLC4A11</i> | 0.4366 | 0.9075 | vt     | Intronic variants                          | non-EDS gene |
| <i>VSX1</i>    | 0.4376 | 0.9075 | kbac   | Nonsynonymous variants and in-frame indels | non-EDS gene |
| <i>LAMC3</i>   | 0.4406 | 0.9075 | kbac   | Nonsynonymous variants and in-frame indels | non-EDS gene |
| <i>COL5A3</i>  | 0.4436 | 0.9075 | kbac   | Intronic variants                          | non-EDS gene |
| <i>ZNF469</i>  | 0.4436 | 0.9075 | kbac   | Synonymous variant                         | EDS gene     |
| <i>ZNF469</i>  | 0.4505 | 0.9075 | calpha | Nonsynonymous variants and in-frame indels | EDS gene     |
| <i>ZNF469</i>  | 0.4505 | 0.9075 | calpha | Nonsynonymous variants and in-frame indels | EDS gene     |
| <i>COL2A1</i>  | 0.4525 | 0.9075 | calpha | Synonymous variant                         | non-EDS gene |
| <i>DCAF11</i>  | 0.4565 | 0.9075 | kbac   | Nonsynonymous variants and in-frame indels | non-EDS gene |
| <i>COL12A1</i> | 0.4575 | 0.9075 | calpha | Nonsynonymous variants and in-frame indels | EDS gene     |



|                |        |        |        |                                            |              |
|----------------|--------|--------|--------|--------------------------------------------|--------------|
| <i>COL12A1</i> | 0.4575 | 0.9075 | calpha | Nonsynonymous variants and in-frame indels | EDS gene     |
| <i>RDH13</i>   | 0.4583 | 0.9075 | CMC    | 5' UTR variants                            | non-EDS gene |
| <i>WNT10A</i>  | 0.4608 | 0.9075 | CMC    | Synonymous variant                         | non-EDS gene |
| <i>FASLG</i>   | 0.4615 | 0.9075 | kbac   | Nonsynonymous variants and in-frame indels | non-EDS gene |
| <i>TNXB</i>    | 0.4615 | 0.9075 | kbac   | Nonsense and frameshift variants           | EDS gene     |
| <i>NLRP1</i>   | 0.4648 | 0.9075 | skat   | Synonymous variant                         | non-EDS gene |
| <i>SOD1</i>    | 0.4685 | 0.9075 | vt     | Intronic variants                          | non-EDS gene |
| <i>FASLG</i>   | 0.4695 | 0.9075 | vt     | Nonsynonymous variants and in-frame indels | non-EDS gene |
| <i>TNXB</i>    | 0.4705 | 0.9075 | vt     | Nonsense and frameshift variants           | EDS gene     |
| <i>SLC4A11</i> | 0.4705 | 0.9075 | vt     | Synonymous variant                         | non-EDS gene |
| <i>DCAF11</i>  | 0.4715 | 0.9075 | CMC    | Intronic variants                          | non-EDS gene |
| <i>DOCK9</i>   | 0.4723 | 0.9075 | CMC    | Nonsynonymous variants and in-frame indels | non-EDS gene |
| <i>LCA5</i>    | 0.4735 | 0.9075 | vt     | Synonymous variant                         | non-EDS gene |
| <i>IL1RN</i>   | 0.475  | 0.9075 | CMC    | 5' UTR variants                            | non-EDS gene |
| <i>DOCK1</i>   | 0.4752 | 0.9075 | skat   | Intronic variants                          | non-EDS gene |
| <i>TGFBI</i>   | 0.4765 | 0.9075 | calpha | Nonsynonymous variants and in-frame indels | non-EDS gene |
| <i>TGFBI</i>   | 0.4765 | 0.9075 | calpha | Nonsynonymous variants and in-frame indels | non-EDS gene |
| <i>LAMC3</i>   | 0.4775 | 0.9075 | kbac   | Synonymous variant                         | non-EDS gene |
| <i>COL5A1</i>  | 0.4785 | 0.9075 | vt     | Synonymous variant                         | EDS gene     |
| <i>ZEB1</i>    | 0.4791 | 0.9075 | CMC    | Nonsense and frameshift variants           | non-EDS gene |
| <i>VSX1</i>    | 0.4794 | 0.9075 | CMC    | Nonsense and frameshift variants           | non-EDS gene |
| <i>COL12A1</i> | 0.4797 | 0.9075 | CMC    | Nonsense and frameshift variants           | EDS gene     |
| <i>FASLG</i>   | 0.48   | 0.9075 | CMC    | Synonymous variant                         | non-EDS gene |
| <i>COL5A3</i>  | 0.4815 | 0.9075 | calpha | Synonymous variant                         | non-EDS gene |
| <i>SOD1</i>    | 0.4835 | 0.9075 | vt     | Nonsynonymous variants and in-frame indels | non-EDS gene |
| <i>NLRP1</i>   | 0.4844 | 0.9075 | CMC    | Nonsense and frameshift variants           | non-EDS gene |
| <i>VSX1</i>    | 0.4887 | 0.9075 | CMC    | 3' UTR variants                            | non-EDS gene |
| <i>VSX1</i>    | 0.4896 | 0.9075 | CMC    | Intronic variants                          | non-EDS gene |
| <i>P3H4</i>    | 0.491  | 0.9075 | CMC    | Intronic variants                          | non-EDS gene |
| <i>DCAF11</i>  | 0.4912 | 0.9075 | CMC    | Synonymous variant                         | non-EDS gene |

|                |        |        |        |                                            |              |
|----------------|--------|--------|--------|--------------------------------------------|--------------|
| <i>LAMC3</i>   | 0.4942 | 0.9075 | skat   | Intronic variants                          | non-EDS gene |
| <i>SOD1</i>    | 0.4965 | 0.9075 | kbac   | Nonsynonymous variants and in-frame indels | non-EDS gene |
| <i>LOX</i>     | 0.4995 | 0.9075 | calpha | 5' UTR variants                            | non-EDS gene |
| <i>PRPH2</i>   | 0.4997 | 0.9075 | CMC    | Intronic variants                          | non-EDS gene |
| <i>FASLG</i>   | 0.5001 | 0.9075 | CMC    | Intronic variants                          | non-EDS gene |
| <i>PRPH2</i>   | 0.5003 | 0.9075 | CMC    | 3' UTR variants                            | non-EDS gene |
| <i>COL5A3</i>  | 0.5005 | 0.9075 | kbac   | Nonsynonymous variants and in-frame indels | non-EDS gene |
| <i>LOX</i>     | 0.5006 | 0.9075 | CMC    | 3' UTR variants                            | non-EDS gene |
| <i>SLC4A11</i> | 0.5014 | 0.9075 | skat   | Synonymous variant                         | non-EDS gene |
| <i>LOX</i>     | 0.5025 | 0.9075 | calpha | Synonymous variant                         | non-EDS gene |
| <i>FNDC3B</i>  | 0.5035 | 0.9075 | calpha | Synonymous variant                         | non-EDS gene |
| <i>DOCK1</i>   | 0.5095 | 0.9109 | calpha | Nonsynonymous variants and in-frame indels | non-EDS gene |
| <i>DOCK1</i>   | 0.5095 | 0.9109 | calpha | Nonsynonymous variants and in-frame indels | non-EDS gene |
| <i>P3H4</i>    | 0.51   | 0.9109 | CMC    | Nonsynonymous variants and in-frame indels | non-EDS gene |
| <i>PARP1</i>   | 0.5115 | 0.9109 | kbac   | Nonsynonymous variants and in-frame indels | non-EDS gene |
| <i>LOXHD1</i>  | 0.5135 | 0.9109 | kbac   | Synonymous variant                         | non-EDS gene |
| <i>RDH13</i>   | 0.5144 | 0.9109 | skat   | Synonymous variant                         | non-EDS gene |
| <i>VSX1</i>    | 0.5225 | 0.9194 | kbac   | Synonymous variant                         | non-EDS gene |
| <i>COL12A1</i> | 0.5235 | 0.9194 | kbac   | Nonsynonymous variants and in-frame indels | EDS gene     |
| <i>TF</i>      | 0.5236 | 0.9194 | skat   | Nonsynonymous variants and in-frame indels | non-EDS gene |
| <i>PARP2</i>   | 0.5315 | 0.9282 | vt     | Intronic variants                          | non-EDS gene |
| <i>COL12A1</i> | 0.5335 | 0.9282 | vt     | Nonsynonymous variants and in-frame indels | EDS gene     |
| <i>COL2A1</i>  | 0.5345 | 0.9282 | vt     | Nonsynonymous variants and in-frame indels | non-EDS gene |
| <i>NLRP1</i>   | 0.5355 | 0.9282 | vt     | 3' UTR variants                            | non-EDS gene |
| <i>VSX1</i>    | 0.5365 | 0.9282 | vt     | Synonymous variant                         | non-EDS gene |
| <i>SLC4A11</i> | 0.5378 | 0.9282 | CMC    | Nonsense and frameshift variants           | non-EDS gene |
| <i>COL12A1</i> | 0.55   | 0.9392 | CMC    | Nonsynonymous variants and in-frame indels | EDS gene     |
| <i>LAMC3</i>   | 0.5514 | 0.9392 | vt     | Intronic variants                          | non-EDS gene |
| <i>FASLG</i>   | 0.5536 | 0.9392 | skat   | Nonsynonymous variants and in-frame indels | non-EDS gene |
| <i>SLC4A11</i> | 0.5544 | 0.9392 | kbac   | Intronic variants                          | non-EDS gene |

|                |        |        |        |                                            |              |
|----------------|--------|--------|--------|--------------------------------------------|--------------|
| <i>SLC4A11</i> | 0.5554 | 0.9392 | kbac   | Synonymous variant                         | non-EDS gene |
| <i>VSX1</i>    | 0.5556 | 0.9392 | skat   | Synonymous variant                         | non-EDS gene |
| <i>TF</i>      | 0.5564 | 0.9392 | calpha | Nonsynonymous variants and in-frame indels | non-EDS gene |
| <i>TF</i>      | 0.5564 | 0.9392 | calpha | Nonsynonymous variants and in-frame indels | non-EDS gene |
| <i>FNDC3B</i>  | 0.5582 | 0.9396 | skat   | Synonymous variant                         | non-EDS gene |
| <i>DOCK1</i>   | 0.5654 | 0.9473 | calpha | Intronic variants                          | non-EDS gene |
| <i>PARP1</i>   | 0.5674 | 0.9473 | calpha | Nonsynonymous variants and in-frame indels | non-EDS gene |
| <i>PARP1</i>   | 0.5674 | 0.9473 | calpha | Nonsynonymous variants and in-frame indels | non-EDS gene |
| <i>HLA-G</i>   | 0.5724 | 0.953  | vt     | Nonsynonymous variants and in-frame indels | non-EDS gene |
| <i>LOX</i>     | 0.5755 | 0.9555 | skat   | Nonsense and frameshift variants           | non-EDS gene |
| <i>DOCK1</i>   | 0.5784 | 0.9578 | vt     | 3' UTR variants                            | non-EDS gene |
| <i>ZNF469</i>  | 0.5815 | 0.9586 | CMC    | Nonsynonymous variants and in-frame indels | EDS gene     |
| <i>DOCK1</i>   | 0.5821 | 0.9586 | CMC    | Nonsynonymous variants and in-frame indels | non-EDS gene |
| <i>SOD1</i>    | 0.5873 | 0.9596 | CMC    | Intronic variants                          | non-EDS gene |
| <i>DOCK9</i>   | 0.5891 | 0.9596 | skat   | 3' UTR variants                            | non-EDS gene |
| <i>LCA5</i>    | 0.5914 | 0.9596 | kbac   | Synonymous variant                         | non-EDS gene |
| <i>LOXHD1</i>  | 0.5914 | 0.9596 | skat   | Synonymous variant                         | non-EDS gene |
| <i>COL2A1</i>  | 0.5944 | 0.9596 | kbac   | Nonsynonymous variants and in-frame indels | non-EDS gene |
| <i>COL5A3</i>  | 0.5947 | 0.9596 | CMC    | Synonymous variant                         | non-EDS gene |
| <i>LOXHD1</i>  | 0.5959 | 0.9596 | CMC    | Intronic variants                          | non-EDS gene |
| <i>COL5A1</i>  | 0.5991 | 0.9596 | CMC    | Synonymous variant                         | EDS gene     |
| <i>DOCK1</i>   | 0.6014 | 0.9596 | kbac   | 3' UTR variants                            | non-EDS gene |
| <i>NLRP1</i>   | 0.6054 | 0.9596 | calpha | Nonsynonymous variants and in-frame indels | non-EDS gene |
| <i>NLRP1</i>   | 0.6054 | 0.9596 | calpha | Nonsynonymous variants and in-frame indels | non-EDS gene |
| <i>DOCK1</i>   | 0.6114 | 0.9596 | vt     | Nonsynonymous variants and in-frame indels | non-EDS gene |
| <i>EPPK1</i>   | 0.6124 | 0.9596 | vt     | Nonsense and frameshift variants           | non-EDS gene |
| <i>HLA-G</i>   | 0.6127 | 0.9596 | CMC    | Nonsynonymous variants and in-frame indels | non-EDS gene |
| <i>RDH13</i>   | 0.6134 | 0.9596 | calpha | Nonsynonymous variants and in-frame indels | non-EDS gene |
| <i>RDH13</i>   | 0.6134 | 0.9596 | calpha | Nonsynonymous variants and in-frame indels | non-EDS gene |
| <i>DOCK9</i>   | 0.6134 | 0.9596 | kbac   | 3' UTR variants                            | non-EDS gene |

|                |        |        |        |                                            |              |
|----------------|--------|--------|--------|--------------------------------------------|--------------|
| <i>LAMC3</i>   | 0.6144 | 0.9596 | calpha | Intronic variants                          | non-EDS gene |
| <i>RDH13</i>   | 0.6154 | 0.9596 | kbac   | Synonymous variant                         | non-EDS gene |
| <i>LAMC3</i>   | 0.6167 | 0.9596 | CMC    | Nonsynonymous variants and in-frame indels | non-EDS gene |
| <i>NLRP1</i>   | 0.6183 | 0.9596 | CMC    | Nonsynonymous variants and in-frame indels | non-EDS gene |
| <i>NLRP1</i>   | 0.6184 | 0.9596 | vt     | Intronic variants                          | non-EDS gene |
| <i>FASLG</i>   | 0.6229 | 0.9596 | skat   | 5' UTR variants                            | non-EDS gene |
| <i>LOXHD1</i>  | 0.6239 | 0.9596 | CMC    | 5' UTR variants                            | non-EDS gene |
| <i>LOX</i>     | 0.6257 | 0.9596 | CMC    | 5' UTR variants                            | non-EDS gene |
| <i>LOX</i>     | 0.6258 | 0.9596 | CMC    | Synonymous variant                         | non-EDS gene |
| <i>PARP2</i>   | 0.6263 | 0.9596 | skat   | Intronic variants                          | non-EDS gene |
| <i>COL5A3</i>  | 0.6294 | 0.9596 | vt     | Intronic variants                          | non-EDS gene |
| <i>ZNF469</i>  | 0.6304 | 0.9596 | kbac   | Nonsynonymous variants and in-frame indels | EDS gene     |
| <i>DOCK1</i>   | 0.6314 | 0.9596 | kbac   | Nonsynonymous variants and in-frame indels | non-EDS gene |
| <i>DOCK9</i>   | 0.6314 | 0.9596 | vt     | 3' UTR variants                            | non-EDS gene |
| <i>TF</i>      | 0.6361 | 0.9644 | skat   | 5' UTR variants                            | non-EDS gene |
| <i>MMP9</i>    | 0.6394 | 0.967  | vt     | Nonsynonymous variants and in-frame indels | non-EDS gene |
| <i>COL5A3</i>  | 0.6427 | 0.9676 | CMC    | Intronic variants                          | non-EDS gene |
| <i>PRPH2</i>   | 0.643  | 0.9676 | skat   | Intronic variants                          | non-EDS gene |
| <i>COL5A1</i>  | 0.6504 | 0.9757 | kbac   | Nonsynonymous variants and in-frame indels | EDS gene     |
| <i>PARP2</i>   | 0.6529 | 0.9757 | skat   | Synonymous variant                         | non-EDS gene |
| <i>SLC4A11</i> | 0.6533 | 0.9757 | calpha | Intronic variants                          | non-EDS gene |
| <i>PRPH2</i>   | 0.6547 | 0.9757 | skat   | 5' UTR variants                            | non-EDS gene |
| <i>LAMC3</i>   | 0.6573 | 0.9772 | vt     | Synonymous variant                         | non-EDS gene |
| <i>ZEB1</i>    | 0.6599 | 0.9786 | skat   | Nonsynonymous variants and in-frame indels | non-EDS gene |
| <i>LOX</i>     | 0.6628 | 0.9806 | skat   | Intronic variants                          | non-EDS gene |
| <i>FNDC3B</i>  | 0.6661 | 0.9828 | CMC    | Synonymous variant                         | non-EDS gene |
| <i>TGFBI</i>   | 0.6683 | 0.9828 | skat   | Synonymous variant                         | non-EDS gene |
| <i>LAMC3</i>   | 0.6693 | 0.9828 | calpha | Synonymous variant                         | non-EDS gene |
| <i>TNXB</i>    | 0.6722 | 0.9828 | CMC    | Nonsynonymous variants and in-frame indels | EDS gene     |
| <i>PARP1</i>   | 0.6723 | 0.9828 | vt     | Intronic variants                          | non-EDS gene |

|                |        |        |        |                                            |              |
|----------------|--------|--------|--------|--------------------------------------------|--------------|
| <i>PRPH2</i>   | 0.6753 | 0.9839 | CMC    | 5' UTR variants                            | non-EDS gene |
| <i>P3H4</i>    | 0.6763 | 0.9839 | calpha | Intronic variants                          | non-EDS gene |
| <i>TGFBI</i>   | 0.6814 | 0.9863 | CMC    | Synonymous variant                         | non-EDS gene |
| <i>LOX</i>     | 0.6833 | 0.9863 | vt     | Intronic variants                          | non-EDS gene |
| <i>LOXHD1</i>  | 0.6853 | 0.9863 | calpha | Synonymous variant                         | non-EDS gene |
| <i>RDH13</i>   | 0.6873 | 0.9863 | vt     | Synonymous variant                         | non-EDS gene |
| <i>ZNF469</i>  | 0.6883 | 0.9863 | vt     | Synonymous variant                         | EDS gene     |
| <i>LOX</i>     | 0.6893 | 0.9863 | kbac   | Intronic variants                          | non-EDS gene |
| <i>COL5A1</i>  | 0.6933 | 0.9863 | skat   | Nonsynonymous variants and in-frame indels | EDS gene     |
| <i>LOXHD1</i>  | 0.6953 | 0.9863 | calpha | Nonsynonymous variants and in-frame indels | non-EDS gene |
| <i>LOXHD1</i>  | 0.6953 | 0.9863 | calpha | Nonsynonymous variants and in-frame indels | non-EDS gene |
| <i>VSX1</i>    | 0.6956 | 0.9863 | CMC    | Nonsynonymous variants and in-frame indels | non-EDS gene |
| <i>ZNF469</i>  | 0.6963 | 0.9863 | vt     | Nonsynonymous variants and in-frame indels | EDS gene     |
| <i>P3H4</i>    | 0.7006 | 0.9863 | skat   | Intronic variants                          | non-EDS gene |
| <i>COL5A3</i>  | 0.7011 | 0.9863 | skat   | Intronic variants                          | non-EDS gene |
| <i>ZNF469</i>  | 0.7043 | 0.9863 | CMC    | Synonymous variant                         | EDS gene     |
| <i>EPPK1</i>   | 0.7083 | 0.9863 | kbac   | Nonsense and frameshift variants           | non-EDS gene |
| <i>HLA-G</i>   | 0.7083 | 0.9863 | vt     | Synonymous variant                         | non-EDS gene |
| <i>SOD1</i>    | 0.7092 | 0.9863 | skat   | Nonsynonymous variants and in-frame indels | non-EDS gene |
| <i>SLC4A11</i> | 0.7096 | 0.9863 | skat   | Intronic variants                          | non-EDS gene |
| <i>NLRP1</i>   | 0.7103 | 0.9863 | kbac   | Synonymous variant                         | non-EDS gene |
| <i>TGFBI</i>   | 0.7123 | 0.9863 | kbac   | Intronic variants                          | non-EDS gene |
| <i>PARP1</i>   | 0.7133 | 0.9863 | skat   | Nonsynonymous variants and in-frame indels | non-EDS gene |
| <i>TGFBI</i>   | 0.7143 | 0.9863 | vt     | Intronic variants                          | non-EDS gene |
| <i>VSX1</i>    | 0.7183 | 0.9863 | calpha | Synonymous variant                         | non-EDS gene |
| <i>DOCK1</i>   | 0.7187 | 0.9863 | skat   | Synonymous variant                         | non-EDS gene |
| <i>NLRP1</i>   | 0.7219 | 0.9863 | CMC    | Synonymous variant                         | non-EDS gene |
| <i>P3H4</i>    | 0.7223 | 0.9863 | vt     | Nonsynonymous variants and in-frame indels | non-EDS gene |
| <i>SOD1</i>    | 0.7293 | 0.9863 | calpha | Nonsynonymous variants and in-frame indels | non-EDS gene |
| <i>SOD1</i>    | 0.7293 | 0.9863 | calpha | Nonsynonymous variants and in-frame indels | non-EDS gene |

|               |        |        |        |                                            |              |
|---------------|--------|--------|--------|--------------------------------------------|--------------|
| <i>TNXB</i>   | 0.7323 | 0.9863 | calpha | Nonsense and frameshift variants           | EDS gene     |
| <i>DOCK1</i>  | 0.7323 | 0.9863 | calpha | Synonymous variant                         | non-EDS gene |
| <i>LOXHD1</i> | 0.7343 | 0.9863 | kbac   | Nonsynonymous variants and in-frame indels | non-EDS gene |
| <i>DOCK1</i>  | 0.7348 | 0.9863 | skat   | 3' UTR variants                            | non-EDS gene |
| <i>DCAF11</i> | 0.7363 | 0.9863 | calpha | Synonymous variant                         | non-EDS gene |
| <i>LCA5</i>   | 0.7393 | 0.9863 | calpha | Synonymous variant                         | non-EDS gene |
| <i>NLRP1</i>  | 0.7393 | 0.9863 | kbac   | Intronic variants                          | non-EDS gene |
| <i>TGFBI</i>  | 0.7393 | 0.9863 | vt     | Synonymous variant                         | non-EDS gene |
| <i>LOX</i>    | 0.7398 | 0.9863 | skat   | Nonsynonymous variants and in-frame indels | non-EDS gene |
| <i>FASLG</i>  | 0.7413 | 0.9863 | calpha | Nonsynonymous variants and in-frame indels | non-EDS gene |
| <i>LOXHD1</i> | 0.7447 | 0.9863 | CMC    | Nonsense and frameshift variants           | non-EDS gene |
| <i>TGFBI</i>  | 0.7463 | 0.9863 | CMC    | Nonsynonymous variants and in-frame indels | non-EDS gene |
| <i>DOCK9</i>  | 0.7473 | 0.9863 | kbac   | Nonsynonymous variants and in-frame indels | non-EDS gene |
| <i>LOX</i>    | 0.7473 | 0.9863 | kbac   | 5' UTR variants                            | non-EDS gene |
| <i>PRPH2</i>  | 0.7553 | 0.9863 | CMC    | Nonsynonymous variants and in-frame indels | non-EDS gene |
| <i>COL2A1</i> | 0.7557 | 0.9863 | skat   | Intronic variants                          | non-EDS gene |
| <i>DCAF11</i> | 0.7564 | 0.9863 | CMC    | Nonsynonymous variants and in-frame indels | non-EDS gene |
| <i>LAMC3</i>  | 0.7601 | 0.9863 | CMC    | Intronic variants                          | non-EDS gene |
| <i>SOD1</i>   | 0.7632 | 0.9863 | kbac   | Intronic variants                          | non-EDS gene |
| <i>COL5A1</i> | 0.7642 | 0.9863 | vt     | Nonsynonymous variants and in-frame indels | EDS gene     |
| <i>P3H4</i>   | 0.7686 | 0.9863 | skat   | Nonsynonymous variants and in-frame indels | non-EDS gene |
| <i>LCA5</i>   | 0.7707 | 0.9863 | skat   | Synonymous variant                         | non-EDS gene |
| <i>LCA5</i>   | 0.7722 | 0.9863 | kbac   | Intronic variants                          | non-EDS gene |
| <i>LOX</i>    | 0.7732 | 0.9863 | vt     | Synonymous variant                         | non-EDS gene |
| <i>TNXB</i>   | 0.7732 | 0.9863 | vt     | Synonymous variant                         | EDS gene     |
| <i>LOXHD1</i> | 0.7738 | 0.9863 | skat   | Nonsense and frameshift variants           | non-EDS gene |
| <i>LOX</i>    | 0.7749 | 0.9863 | skat   | 5' UTR variants                            | non-EDS gene |
| <i>LOXHD1</i> | 0.7762 | 0.9863 | kbac   | Intronic variants                          | non-EDS gene |
| <i>PARP2</i>  | 0.7782 | 0.9863 | calpha | Intronic variants                          | non-EDS gene |
| <i>DOCK9</i>  | 0.7791 | 0.9863 | skat   | 5' UTR variants                            | non-EDS gene |

|                |        |        |        |                                            |              |
|----------------|--------|--------|--------|--------------------------------------------|--------------|
| <i>EPPK1</i>   | 0.7842 | 0.9863 | calpha | Nonsynonymous variants and in-frame indels | non-EDS gene |
| <i>EPPK1</i>   | 0.7842 | 0.9863 | calpha | Nonsynonymous variants and in-frame indels | non-EDS gene |
| <i>COL5A3</i>  | 0.7842 | 0.9863 | calpha | Intronic variants                          | non-EDS gene |
| <i>LCA5</i>    | 0.7862 | 0.9863 | vt     | Intronic variants                          | non-EDS gene |
| <i>TGFBI</i>   | 0.7872 | 0.9863 | calpha | Synonymous variant                         | non-EDS gene |
| <i>NLRP1</i>   | 0.7872 | 0.9863 | vt     | Nonsynonymous variants and in-frame indels | non-EDS gene |
| <i>LOX</i>     | 0.7912 | 0.9863 | kbac   | Synonymous variant                         | non-EDS gene |
| <i>FNDC3B</i>  | 0.7922 | 0.9863 | skat   | 3' UTR variants                            | non-EDS gene |
| <i>SOD1</i>    | 0.7922 | 0.9863 | skat   | Synonymous variant                         | non-EDS gene |
| <i>COL2A1</i>  | 0.7935 | 0.9863 | skat   | Nonsense and frameshift variants           | non-EDS gene |
| <i>HLA-G</i>   | 0.7939 | 0.9863 | skat   | Synonymous variant                         | non-EDS gene |
| <i>LOX</i>     | 0.7942 | 0.9863 | vt     | 5' UTR variants                            | non-EDS gene |
| <i>P3H4</i>    | 0.7972 | 0.9863 | kbac   | Nonsynonymous variants and in-frame indels | non-EDS gene |
| <i>SLC4A11</i> | 0.7972 | 0.9863 | kbac   | Nonsense and frameshift variants           | non-EDS gene |
| <i>EPPK1</i>   | 0.7972 | 0.9863 | vt     | Synonymous variant                         | non-EDS gene |
| <i>LCA5</i>    | 0.7984 | 0.9863 | skat   | 3' UTR variants                            | non-EDS gene |
| <i>LOXHD1</i>  | 0.8002 | 0.9863 | CMC    | Nonsynonymous variants and in-frame indels | non-EDS gene |
| <i>SLC4A11</i> | 0.8007 | 0.9863 | skat   | Nonsynonymous variants and in-frame indels | non-EDS gene |
| <i>SLC4A11</i> | 0.8062 | 0.9904 | vt     | Nonsense and frameshift variants           | non-EDS gene |
| <i>MMP9</i>    | 0.8086 | 0.9904 | skat   | Nonsynonymous variants and in-frame indels | non-EDS gene |
| <i>EPPK1</i>   | 0.8142 | 0.9904 | skat   | Nonsense and frameshift variants           | non-EDS gene |
| <i>COL2A1</i>  | 0.815  | 0.9904 | skat   | Nonsynonymous variants and in-frame indels | non-EDS gene |
| <i>SLC4A11</i> | 0.8158 | 0.9904 | skat   | Nonsense and frameshift variants           | non-EDS gene |
| <i>LOXHD1</i>  | 0.8162 | 0.9904 | calpha | Nonsense and frameshift variants           | non-EDS gene |
| <i>VSX1</i>    | 0.8182 | 0.9904 | CMC    | Synonymous variant                         | non-EDS gene |
| <i>LOXHD1</i>  | 0.8182 | 0.9904 | vt     | Intronic variants                          | non-EDS gene |
| <i>FOXO1</i>   | 0.8185 | 0.9904 | skat   | Nonsynonymous variants and in-frame indels | non-EDS gene |
| <i>PRPH2</i>   | 0.8252 | 0.9944 | calpha | Nonsynonymous variants and in-frame indels | non-EDS gene |
| <i>PRPH2</i>   | 0.8252 | 0.9944 | calpha | Nonsynonymous variants and in-frame indels | non-EDS gene |
| <i>LOXHD1</i>  | 0.8336 | 1      | skat   | Nonsynonymous variants and in-frame indels | non-EDS gene |

|                |        |   |        |                                            |              |
|----------------|--------|---|--------|--------------------------------------------|--------------|
| <i>NLRP1</i>   | 0.8444 | 1 | skat   | Nonsynonymous variants and in-frame indels | non-EDS gene |
| <i>TGFBI</i>   | 0.8462 | 1 | kbac   | Synonymous variant                         | non-EDS gene |
| <i>TNXB</i>    | 0.8472 | 1 | kbac   | Synonymous variant                         | EDS gene     |
| <i>EPPK1</i>   | 0.8499 | 1 | skat   | Synonymous variant                         | non-EDS gene |
| <i>NLRP1</i>   | 0.8551 | 1 | vt     | Synonymous variant                         | non-EDS gene |
| <i>PRPH2</i>   | 0.8581 | 1 | kbac   | Intronic variants                          | non-EDS gene |
| <i>PRPH2</i>   | 0.8619 | 1 | skat   | 3' UTR variants                            | non-EDS gene |
| <i>FOXO1</i>   | 0.8631 | 1 | CMC    | Synonymous variant                         | non-EDS gene |
| <i>TNXB</i>    | 0.8647 | 1 | skat   | Intronic variants                          | EDS gene     |
| <i>PRPH2</i>   | 0.8681 | 1 | kbac   | 3' UTR variants                            | non-EDS gene |
| <i>TGFBI</i>   | 0.8683 | 1 | skat   | Intronic variants                          | non-EDS gene |
| <i>PRPH2</i>   | 0.8711 | 1 | kbac   | Nonsynonymous variants and in-frame indels | non-EDS gene |
| <i>COL5A1</i>  | 0.8751 | 1 | calpha | Nonsynonymous variants and in-frame indels | EDS gene     |
| <i>ZNF469</i>  | 0.8752 | 1 | skat   | Synonymous variant                         | EDS gene     |
| <i>NLRP1</i>   | 0.8752 | 1 | CMC    | Intronic variants                          | non-EDS gene |
| <i>LOX</i>     | 0.8754 | 1 | skat   | 3' UTR variants                            | non-EDS gene |
| <i>SOD1</i>    | 0.8761 | 1 | kbac   | 5' UTR variants                            | non-EDS gene |
| <i>PRPH2</i>   | 0.8761 | 1 | vt     | 3' UTR variants                            | non-EDS gene |
| <i>NLRP1</i>   | 0.8771 | 1 | kbac   | Nonsynonymous variants and in-frame indels | non-EDS gene |
| <i>LOX</i>     | 0.8801 | 1 | kbac   | 3' UTR variants                            | non-EDS gene |
| <i>LOX</i>     | 0.8801 | 1 | vt     | 3' UTR variants                            | non-EDS gene |
| <i>SLC4A11</i> | 0.881  | 1 | CMC    | Synonymous variant                         | non-EDS gene |
| <i>PRPH2</i>   | 0.8821 | 1 | vt     | Intronic variants                          | non-EDS gene |
| <i>EPPK1</i>   | 0.8841 | 1 | calpha | Synonymous variant                         | non-EDS gene |
| <i>PARP1</i>   | 0.8881 | 1 | kbac   | Synonymous variant                         | non-EDS gene |
| <i>DOCK9</i>   | 0.8881 | 1 | vt     | Nonsynonymous variants and in-frame indels | non-EDS gene |
| <i>SLC4A11</i> | 0.889  | 1 | CMC    | Intronic variants                          | non-EDS gene |
| <i>LOX</i>     | 0.8931 | 1 | skat   | Synonymous variant                         | non-EDS gene |
| <i>PARP1</i>   | 0.8941 | 1 | vt     | Synonymous variant                         | non-EDS gene |
| <i>PARP1</i>   | 0.9    | 1 | skat   | Nonsense and frameshift variants           | non-EDS gene |



|                |        |   |        |                                            |              |
|----------------|--------|---|--------|--------------------------------------------|--------------|
| <i>SLC4A11</i> | 0.9001 | 1 | kbac   | Nonsynonymous variants and in-frame indels | non-EDS gene |
| <i>PRPH2</i>   | 0.901  | 1 | skat   | Synonymous variant                         | non-EDS gene |
| <i>LOX</i>     | 0.9031 | 1 | calpha | Intronic variants                          | non-EDS gene |
| <i>EPPK1</i>   | 0.9031 | 1 | kbac   | Synonymous variant                         | non-EDS gene |
| <i>PRPH2</i>   | 0.9051 | 1 | vt     | Nonsynonymous variants and in-frame indels | non-EDS gene |
| <i>RDH13</i>   | 0.9051 | 1 | vt     | Nonsynonymous variants and in-frame indels | non-EDS gene |
| <i>VSX1</i>    | 0.9061 | 1 | calpha | Nonsynonymous variants and in-frame indels | non-EDS gene |
| <i>VSX1</i>    | 0.9061 | 1 | calpha | Nonsynonymous variants and in-frame indels | non-EDS gene |
| <i>TGFBI</i>   | 0.9064 | 1 | skat   | Nonsynonymous variants and in-frame indels | non-EDS gene |
| <i>HLA-G</i>   | 0.9101 | 1 | calpha | Synonymous variant                         | non-EDS gene |
| <i>DOCK1</i>   | 0.9141 | 1 | calpha | 3' UTR variants                            | non-EDS gene |
| <i>COL5A1</i>  | 0.9143 | 1 | CMC    | Nonsynonymous variants and in-frame indels | EDS gene     |
| <i>EPPK1</i>   | 0.9161 | 1 | vt     | Nonsynonymous variants and in-frame indels | non-EDS gene |
| <i>LOXHD1</i>  | 0.9196 | 1 | CMC    | Synonymous variant                         | non-EDS gene |
| <i>VSX1</i>    | 0.9199 | 1 | skat   | Nonsynonymous variants and in-frame indels | non-EDS gene |
| <i>PRPH2</i>   | 0.9223 | 1 | skat   | Nonsynonymous variants and in-frame indels | non-EDS gene |
| <i>RDH13</i>   | 0.9226 | 1 | skat   | Nonsynonymous variants and in-frame indels | non-EDS gene |
| <i>PARP1</i>   | 0.9311 | 1 | vt     | Nonsense and frameshift variants           | non-EDS gene |
| <i>EPPK1</i>   | 0.9361 | 1 | kbac   | Nonsynonymous variants and in-frame indels | non-EDS gene |
| <i>PARP1</i>   | 0.9361 | 1 | kbac   | Nonsense and frameshift variants           | non-EDS gene |
| <i>SLC4A11</i> | 0.9361 | 1 | vt     | Nonsynonymous variants and in-frame indels | non-EDS gene |
| <i>RDH13</i>   | 0.9391 | 1 | kbac   | Nonsynonymous variants and in-frame indels | non-EDS gene |
| <i>TF</i>      | 0.9401 | 1 | vt     | Nonsynonymous variants and in-frame indels | non-EDS gene |
| <i>EPPK1</i>   | 0.9421 | 1 | calpha | Nonsense and frameshift variants           | non-EDS gene |
| <i>COL2A1</i>  | 0.954  | 1 | calpha | Nonsynonymous variants and in-frame indels | non-EDS gene |
| <i>SOD1</i>    | 0.956  | 1 | vt     | 5' UTR variants                            | non-EDS gene |
| <i>SLC4A11</i> | 0.957  | 1 | calpha | Synonymous variant                         | non-EDS gene |
| <i>LOXHD1</i>  | 0.9728 | 1 | skat   | Intronic variants                          | non-EDS gene |
| <i>TGFBI</i>   | 0.974  | 1 | calpha | Intronic variants                          | non-EDS gene |
| <i>PRPH2</i>   | 0.978  | 1 | kbac   | Synonymous variant                         | non-EDS gene |

|                |       |   |        |                                            |              |
|----------------|-------|---|--------|--------------------------------------------|--------------|
| <i>TF</i>      | 0.988 | 1 | kbac   | Nonsynonymous variants and in-frame indels | non-EDS gene |
| <i>PRPH2</i>   | 0.99  | 1 | vt     | Synonymous variant                         | non-EDS gene |
| <i>NLRP1</i>   | 0.991 | 1 | calpha | Intronic variants                          | non-EDS gene |
| <i>LOXHD1</i>  | 0.995 | 1 | calpha | Intronic variants                          | non-EDS gene |
| <i>TNXB</i>    | 0.995 | 1 | vt     | Intronic variants                          | EDS gene     |
| <i>LAMC3</i>   | 0.996 | 1 | calpha | Nonsynonymous variants and in-frame indels | non-EDS gene |
| <i>LAMC3</i>   | 0.996 | 1 | calpha | Nonsynonymous variants and in-frame indels | non-EDS gene |
| <i>TNXB</i>    | 0.997 | 1 | kbac   | Intronic variants                          | EDS gene     |
| <i>COL2A1</i>  | 1     | 1 | CMC    | Nonsynonymous variants and in-frame indels | non-EDS gene |
| <i>FASLG</i>   | 1     | 1 | CMC    | Nonsynonymous variants and in-frame indels | non-EDS gene |
| <i>COL5A3</i>  | 1     | 1 | CMC    | Nonsynonymous variants and in-frame indels | non-EDS gene |
| <i>MMP9</i>    | 1     | 1 | CMC    | Nonsynonymous variants and in-frame indels | non-EDS gene |
| <i>PARP1</i>   | 1     | 1 | CMC    | Nonsynonymous variants and in-frame indels | non-EDS gene |
| <i>SOD1</i>    | 1     | 1 | CMC    | Nonsynonymous variants and in-frame indels | non-EDS gene |
| <i>COL2A1</i>  | 1     | 1 | CMC    | Nonsense and frameshift variants           | non-EDS gene |
| <i>EPPK1</i>   | 1     | 1 | CMC    | Nonsense and frameshift variants           | non-EDS gene |
| <i>RDH13</i>   | 1     | 1 | CMC    | Nonsense and frameshift variants           | non-EDS gene |
| <i>LOX</i>     | 1     | 1 | CMC    | Nonsense and frameshift variants           | non-EDS gene |
| <i>TNXB</i>    | 1     | 1 | CMC    | Nonsense and frameshift variants           | EDS gene     |
| <i>COL2A1</i>  | 1     | 1 | CMC    | 3' UTR variants                            | non-EDS gene |
| <i>DOCK1</i>   | 1     | 1 | CMC    | 3' UTR variants                            | non-EDS gene |
| <i>FNDC3B</i>  | 1     | 1 | CMC    | 3' UTR variants                            | non-EDS gene |
| <i>DOCK9</i>   | 1     | 1 | CMC    | 3' UTR variants                            | non-EDS gene |
| <i>LCA5</i>    | 1     | 1 | CMC    | 3' UTR variants                            | non-EDS gene |
| <i>SLC4A11</i> | 1     | 1 | CMC    | 3' UTR variants                            | non-EDS gene |
| <i>DOCK9</i>   | 1     | 1 | CMC    | 5' UTR variants                            | non-EDS gene |
| <i>FASLG</i>   | 1     | 1 | CMC    | 5' UTR variants                            | non-EDS gene |
| <i>TF</i>      | 1     | 1 | CMC    | 5' UTR variants                            | non-EDS gene |
| <i>DOCK9</i>   | 1     | 1 | CMC    | Intronic variants                          | non-EDS gene |
| <i>LOX</i>     | 1     | 1 | CMC    | Intronic variants                          | non-EDS gene |

|               |   |   |      |                                            |              |
|---------------|---|---|------|--------------------------------------------|--------------|
| <i>TF</i>     | 1 | 1 | CMC  | Intronic variants                          | non-EDS gene |
| <i>TGFB1</i>  | 1 | 1 | CMC  | Intronic variants                          | non-EDS gene |
| <i>PARP1</i>  | 1 | 1 | CMC  | Intronic variants                          | non-EDS gene |
| <i>HLA-G</i>  | 1 | 1 | CMC  | Synonymous variant                         | non-EDS gene |
| <i>LAMC3</i>  | 1 | 1 | CMC  | Synonymous variant                         | non-EDS gene |
| <i>LCA5</i>   | 1 | 1 | CMC  | Synonymous variant                         | non-EDS gene |
| <i>RDH13</i>  | 1 | 1 | CMC  | Synonymous variant                         | non-EDS gene |
| <i>TF</i>     | 1 | 1 | CMC  | Synonymous variant                         | non-EDS gene |
| <i>SOD1</i>   | 1 | 1 | CMC  | Synonymous variant                         | non-EDS gene |
| <i>EPPK1</i>  | 1 | 1 | skat | Nonsynonymous variants and in-frame indels | non-EDS gene |
| <i>LAMC3</i>  | 1 | 1 | skat | Nonsynonymous variants and in-frame indels | non-EDS gene |
| <i>COL2A1</i> | 1 | 1 | skat | 3' UTR variants                            | non-EDS gene |
| <i>NLRP1</i>  | 1 | 1 | skat | Intronic variants                          | non-EDS gene |

MAF = Minor Allele Frequency; Vt = Variable Thresholds methods; kbac = kernel-based adaptive cluster; CMC = Combined and Multivariate collapsing; skat = SNP-set (Sequence) Kernel Association Method; EDS = Ehlers-Danlos Syndrome. Hg19 was used as reference genome.

**Supplemental table S5.** Identified variants in *COL5A1* with MAF<1% in the control population (according to NM\_000093.4). Reference genome is hg19.

| Genomic position            | Variant alleles in patients/<br>Total number of patient alleles | Variant alleles in controls/<br>Total number of control alleles | cDNA change          | Amino Acid change | p-value |
|-----------------------------|-----------------------------------------------------------------|-----------------------------------------------------------------|----------------------|-------------------|---------|
| chr9:137582774C>T           | 1/1468                                                          | 1/1604                                                          | c.126C>T             | p.(=)             | 1.0000  |
| chr9:137582841C>T           | 7/1486                                                          | 6/1618                                                          | c.193C>T             | p.(Arg65Trp)      | 0.7835  |
| chr9:137591755C>T           | 4/1490                                                          | 6/1618                                                          | c.278C>T             | p.(Ala93Val)      | 0.7556  |
| chr9:137591756G>A           | 1/1490                                                          | 2/1618                                                          | c.279G>A             | p.(=)             | 1.0000  |
| chr9:137591773A>C           | 1/1490                                                          | 0/1618                                                          | c.296A>C             | p.(Asp99Ala)      | 0.4794  |
| chr9:137591801C>T           | 0/1490                                                          | 2/1618                                                          | c.324C>T             | p.(=)             | 0.5007  |
| chr9:137591818C>A           | 3/1438                                                          | 0/1582                                                          | c.341C>A             | p.(Ala114Asp)     | 0.1078  |
| chr9:137591855G>T           | 0/1472                                                          | 1/1606                                                          | c.378G>T             | p.(Gln126His)     | 1.0000  |
| chr9:137593039G>T           | 1/1486                                                          | 3/1618                                                          | c.514G>T             | p.(Val172Phe)     | 0.6261  |
| chr9:137593069G>A           | 1/1486                                                          | 0/1618                                                          | c.544G>A             | p.(Asp182Asn)     | 0.4787  |
| chr9:137593098C>T           | 9/1488                                                          | 0/1618                                                          | c.573C>T             | p.(=)             | 0.0013  |
| chr9:137593099G>A           | 15/1488                                                         | 14/1618                                                         | c.574G>A             | p.(Asp192Asn)     | 0.7121  |
| chr9:137593102C>T           | 0/1488                                                          | 1/1618                                                          | c.577C>T             | p.(Arg193Cys)     | 1.0000  |
| chr9:137593123G>A           | 1/1038                                                          | 1/1074                                                          | c.598G>A             | p.(Asp200Asn)     | 1.0000  |
| chr9:137620475G>A           | 1/1170                                                          | 0/1368                                                          | c.787-41G>A          |                   | 0.4610  |
| chr9:137620688C>A           | 1/300                                                           | 0/492                                                           | c.924+35C>A          |                   | 0.3788  |
| chr9:137622093G>A           | 1/1286                                                          | 2/1472                                                          | c.936G>A             | p.(=)             | 1.0000  |
| chr9:137622153C>T           | 3/1432                                                          | 0/1598                                                          | c.996C>T             | p.(=)             | 0.1054  |
| chr9:137622157G>A           | 0/1432                                                          | 1/1596                                                          | c.1000G>A            | p.(Gly334Ser)     | 1.0000  |
| chr9:137622219C>T           | 1/1102                                                          | 1/1294                                                          | c.1062C>T            | p.(=)             | 1.0000  |
| chr9:137623302C>T           | 0/1420                                                          | 1/1568                                                          | c.1165-40C>T         |                   | 1.0000  |
| chr9:137623378G>A           | 0/1422                                                          | 1/1572                                                          | c.1201G>A            | p.(Glu401Lys)     | 1.0000  |
| chr9:137623458G>A           | 1/1190                                                          | 0/1338                                                          | c.1281G>A            | p.(=)             | 0.4707  |
| chr9:137623918T>C           | 1/1188                                                          | 0/1366                                                          | c.1334T>C            | p.(Ile445Thr)     | 0.4652  |
| chr9:137623967C>T           | 3/1186                                                          | 2/1366                                                          | c.1383C>T            | p.(=)             | 0.6685  |
| chr9:137630279G>A           | 1/368                                                           | 0/466                                                           | c.1390-41G>A         |                   | 0.4412  |
| chr9:137630284G>A           | 0/368                                                           | 1/464                                                           | c.1390-36G>A         |                   | 1.0000  |
| chr9:137630288C>T           | 3/368                                                           | 1/466                                                           | c.1390-32C>T         |                   | 0.3263  |
| chr9:137630302_137630303del | 0/358                                                           | 1/452                                                           | c.1390-18_1390-17del |                   | 1.0000  |
| chr9:137630541T>C           | 0/1036                                                          | 2/1256                                                          | c.1432-51T>C         |                   | 0.5044  |
| chr9:137630560T>C           | 1/1034                                                          | 0/1256                                                          | c.1432-32T>C         |                   | 0.4515  |
| chr9:137642420C>T           | 1/622                                                           | 0/776                                                           | c.1527C>T            | p.(=)             | 0.4449  |
| chr9:137642459G>A           | 1/626                                                           | 1/780                                                           | c.1566G>A            | p.(=)             | 1.0000  |
| chr9:137642816C>T           | 1/924                                                           | 0/1214                                                          | c.1662+88C>T         |                   | 0.4322  |
| chr9:137642816C>A           | 2/926                                                           | 3/1212                                                          | c.1662+88C>A         |                   | 1.0000  |
| chr9:137648616G>T           | 1/922                                                           | 0/1010                                                          | c.1833G>T            | p.(=)             | 0.4772  |
| chr9:137648681C>T           | 0/922                                                           | 1/1008                                                          | c.1881+17C>T         |                   | 1.0000  |
| chr9:137650084T>G           | 1/1036                                                          | 1/1242                                                          | c.1882-5T>G          |                   | 1.0000  |
| chr9:137650150T>G           | 1/1038                                                          | 1/1242                                                          | c.1935+8T>G          |                   | 1.0000  |
| chr9:137650154C>T           | 0/1036                                                          | 1/1240                                                          | c.1935+12C>T         |                   | 1.0000  |
| chr9:137653750G>C           | 1/1312                                                          | 2/1536                                                          | c.1936-21G>C         |                   | 1.0000  |
| chr9:137655516C>T           | 2/1292                                                          | 3/1478                                                          | c.1990-23C>T         |                   | 1.0000  |
| chr9:137655530C>T           | 1/1292                                                          | 0/1478                                                          | c.1990-9C>T          |                   | 0.4664  |
| chr9:137655580G>A           | 1/1292                                                          | 1/1478                                                          | c.2031G>A            | p.(=)             | 1.0000  |
| chr9:137655607C>T           | 19/1290                                                         | 13/1478                                                         | c.2034+24C>T         |                   | 0.1571  |
| chr9:137658291C>T           | 5/1470                                                          | 0/1612                                                          | c.2089-9C>T          |                   | 0.0246  |
| chr9:137658303G>C           | 0/1470                                                          | 1/1612                                                          | c.2092G>C            | p.(Val698Leu)     | 1.0000  |
| chr9:137658304T>A           | 0/1470                                                          | 1/1612                                                          | c.2093T>A            | p.(Val698Asp)     | 1.0000  |
| chr9:137658307C>T           | 3/1470                                                          | 2/1612                                                          | c.2096C>T            | p.(Thr699Met)     | 0.6743  |
| chr9:137658877A>G           | 0/1408                                                          | 1/1532                                                          | c.2165A>G            | p.(Gln722Arg)     | 1.0000  |
| chr9:137659145C>A           | 1/1198                                                          | 0/1388                                                          | c.2188-11C>A         |                   | 0.4633  |
| chr9:137659237G>A           | 1/1198                                                          | 0/1388                                                          | c.2232+37G>A         |                   | 0.4633  |
| chr9:137659238C>T           | 0/1200                                                          | 1/1388                                                          | c.2232+38C>T         |                   | 1.0000  |
| chr9:137660363G>A           | 1/1138                                                          | 0/1352                                                          | c.2286+54G>A         |                   | 0.4570  |
| chr9:137666681C>T           | 2/1450                                                          | 0/1602                                                          | c.2332-24C>T         |                   | 0.2256  |
| chr9:137666682G>A           | 0/1448                                                          | 1/1604                                                          | c.2332-23G>A         |                   | 1.0000  |
| chr9:137666719C>G           | 1/1450                                                          | 0/1604                                                          | c.2346C>G            | p.(=)             | 0.4748  |

|                   |         |         |               |                |        |
|-------------------|---------|---------|---------------|----------------|--------|
| chr9:137666728G>A | 0/1448  | 1/1604  | c.2355G>A     | p.(=)          | 1.0000 |
| chr9:137666787G>A | 1/1450  | 0/1604  | c.2385+29G>A  |                | 0.4748 |
| chr9:137671999C>T | 0/1488  | 1/1618  | c.2430+7C>T   |                | 1.0000 |
| chr9:137674521C>T | 0/1372  | 1/1524  | c.2439C>T     | p.(=)          | 1.0000 |
| chr9:137674589T>C | 0/1368  | 1/1524  | c.2484+23T>C  |                | 1.0000 |
| chr9:137676825T>C | 0/1248  | 1/1410  | c.2485-10T>C  |                | 1.0000 |
| chr9:137676892C>T | 1/1250  | 0/1414  | c.2542C>T     | p.(Arg848Cys)  | 0.4692 |
| chr9:137676905A>G | 1/1250  | 1/1414  | c.2555A>G     | p.(Asn852Ser)  | 1.0000 |
| chr9:137676914C>G | 1/1378  | 1/1562  | c.2564C>G     | p.(Pro855Arg)  | 1.0000 |
| chr9:137687010C>T | 0/1490  | 1/1620  | c.2745+38C>T  |                | 1.0000 |
| chr9:137687040G>A | 0/1490  | 1/1620  | c.2745+68G>A  |                | 1.0000 |
| chr9:137688283C>T | 1/1126  | 0/1298  | c.2844+19C>T  |                | 0.4645 |
| chr9:137688284G>T | 0/1126  | 1/1300  | c.2844+20G>T  |                | 1.0000 |
| chr9:137688604G>A | 0/1418  | 2/1558  | c.2845-90G>A  |                | 0.5009 |
| chr9:137688635C>T | 12/1418 | 5/1558  | c.2845-59C>T  |                | 0.0857 |
| chr9:137690241G>A | 0/1490  | 1/1620  | c.2899-13G>A  |                | 1.0000 |
| chr9:137694741C>T | 0/1438  | 1/1582  | c.3014C>T     | p.(Thr1005Met) | 1.0000 |
| chr9:137694796C>T | 0/1442  | 1/1584  | c.3069C>T     | p.(=)          | 1.0000 |
| chr9:137694814G>A | 0/1346  | 1/1534  | c.3087G>A     | p.(=)          | 1.0000 |
| chr9:137694853G>C | 0/1488  | 2/1620  | c.3114+12G>C  |                | 0.5007 |
| chr9:137694875C>T | 1/1488  | 0/1620  | c.3114+34C>T  |                | 0.4788 |
| chr9:137694947C>T | 1/1488  | 0/1620  | c.3114+106C>T |                | 0.4788 |
| chr9:137696895G>A | 1/1410  | 0/1570  | c.3189G>A     | p.(=)          | 0.4732 |
| chr9:137697995G>A | 0/830   | 1/992   | c.3259-40G>A  |                | 1.0000 |
| chr9:137698067C>T | 1/1490  | 0/1620  | c.3291C>T     | p.(=)          | 0.4791 |
| chr9:137698068G>A | 1/1490  | 0/1620  | c.3292G>A     | p.(Ala1098Thr) | 0.4791 |
| chr9:137703169G>C | 1/884   | 0/996   | c.3529-16G>C  |                | 0.4702 |
| chr9:137703346C>T | 0/922   | 2/1150  | c.3591C>T     | p.(=)          | 0.5058 |
| chr9:137703465C>T | 1/524   | 0/696   | c.3690+20C>T  |                | 0.4295 |
| chr9:137703489C>T | 1/742   | 1/954   | c.3690+44C>T  |                | 1.0000 |
| chr9:137703495C>A | 1/742   | 1/952   | c.3690+50C>A  |                | 1.0000 |
| chr9:137704286T>C | 1/1488  | 0/1618  | c.3691-9T>C   |                | 0.4791 |
| chr9:137704379C>T | 2/1490  | 4/1620  | c.3744+31C>T  |                | 0.6888 |
| chr9:137704385A>G | 0/1490  | 1/1620  | c.3744+37A>G  |                | 1.0000 |
| chr9:137704387C>T | 0/1490  | 2/1620  | c.3744+39C>T  |                | 0.5007 |
| chr9:137704630G>T | 1/898   | 0/1130  | c.3852+72G>T  |                | 0.4428 |
| chr9:137705831C>T | 1/1220  | 0/1328  | c.3855C>T     | p.(=)          | 0.4788 |
| chr9:137705893G>A | 1/1214  | 0/1316  | c.3906+11G>A  |                | 0.4798 |
| chr9:137705902G>A | 0/1212  | 3/1314  | c.3906+20G>A  |                | 0.2509 |
| chr9:137705916A>G | 1/1218  | 0/1318  | c.3906+34A>G  |                | 0.4803 |
| chr9:137706595G>A | 1/1146  | 1/1384  | c.3907-48G>A  |                | 1.0000 |
| chr9:137706659G>A | 1/1138  | 0/1372  | c.3923G>A     | p.(Arg1308Lys) | 0.4534 |
| chr9:137706772C>T | 1/398   | 0/548   | c.4014+22C>T  |                | 0.4207 |
| chr9:137707472C>T | 0/434   | 1/642   | c.4065C>T     | p.(=)          | 1.0000 |
| chr9:137708884C>T | 18/1358 | 14/1536 | c.4135C>T     | p.(Pro1379Ser) | 0.2926 |
| chr9:137708907G>A | 0/1144  | 1/1310  | c.4158G>A     | p.(=)          | 1.0000 |
| chr9:137708915C>T | 0/1140  | 1/1292  | c.4166C>T     | p.(Pro1389Leu) | 1.0000 |
| chr9:137709690G>A | 0/372   | 1/422   | c.4230+13G>A  |                | 1.0000 |
| chr9:137710561C>T | 1/662   | 1/904   | c.4290C>T     | p.(=)          | 1.0000 |
| chr9:137710672G>T | 4/482   | 4/540   | c.4339-22G>T  |                | 1.0000 |
| chr9:137710699A>T | 0/1108  | 1/1276  | c.4344A>T     | p.(Glu1448Asp) | 1.0000 |
| chr9:137710744C>T | 0/704   | 1/858   | c.4389C>T     | p.(=)          | 1.0000 |
| chr9:137710765T>C | 1/710   | 0/870   | c.4392+18T>C  |                | 0.4494 |
| chr9:137710777C>G | 14/1212 | 6/1426  | c.4392+30C>G  |                | 0.0408 |
| chr9:137710792C>T | 14/1212 | 6/1426  | c.4392+45C>T  |                | 0.0408 |
| chr9:137710827C>T | 0/622   | 1/860   | c.4393-19C>T  |                | 1.0000 |
| chr9:137710829C>T | 5/616   | 4/860   | c.4393-17C>T  |                | 0.5031 |
| chr9:137710863C>T | 3/646   | 4/890   | c.4410C>T     | p.(=)          | 1.0000 |
| chr9:137710938G>A | 0/660   | 1/926   | c.4446+39G>A  |                | 1.0000 |
| chr9:137712022C>T | 0/1480  | 1/1616  | c.4507C>T     | p.(Arg1503Cys) | 1.0000 |
| chr9:137715276G>A | 0/1374  | 1/1528  | c.4659G>A     | p.(=)          | 1.0000 |
| chr9:137715293A>C | 0/1306  | 2/1468  | c.4676A>C     | p.(His1559Pro) | 0.5015 |
| chr9:137715300A>C | 0/1304  | 1/1468  | c.4683A>C     | p.(=)          | 1.0000 |
| chr9:137716529C>T | 0/1012  | 2/1302  | c.4782C>T     | p.(=)          | 0.5076 |

|                                |            |            |           |                |        |
|--------------------------------|------------|------------|-----------|----------------|--------|
| chr9:137716542G>A              | 1/1460     | 0/1618     | c.4795G>A | p.(Glu1599Lys) | 0.4743 |
| chr9:137716652C>T              | 0/1430     | 1/1604     | c.4905C>T | p.(=)          | 1.0000 |
| chr9:137717676G>A              | 0/1334     | 2/1508     | c.4993G>A | p.(Asp1665Asn) | 0.5017 |
| chr9:137726950C>T              | 1/308      | 0/474      | c.5270C>T | p.(Thr1757Met) | 0.3939 |
| chr9:137727030G>A              | 0/312      | 1/552      | c.5350G>A | p.(Ala1784Thr) | 1.0000 |
| chr9:137734039G>A              | 0/1094     | 2/1358     | c.5407G>A | p.(Asp1803Asn) | 0.5056 |
| chr9:137734101G>A              | 1/1490     | 0/1620     | c.5469G>A | p.(=)          | 0.4791 |
| chr9:137734101G>C              | 1/1490     | 0/1620     | c.5469G>C | p.(=)          | 0.4791 |
| Sum over all variant positions | 207/150270 | 183/171234 |           |                |        |

MAF = Minor Allele Frequency; chr = chromosome.

**Supplemental table S6.** Identified variants in *COL2A1* with MAF<0.1% in the control population (according to NM\_001844.4). Hg19 was used as reference genome.

| Genomic position           | Variant alleles in patients/<br>Total number of patient alleles | Variant alleles in controls/<br>Total number of control alleles | cDNA change        | Amino Acid change | p-value |
|----------------------------|-----------------------------------------------------------------|-----------------------------------------------------------------|--------------------|-------------------|---------|
| chr12:48367305A>G          | 1/1292                                                          | 0/1500                                                          | c.4349T>C          | p.(Ile1450Thr)    | 0.4628  |
| chr12:48367771T>G          | 1/1088                                                          | 0/1288                                                          | c.4317+101A>C      |                   | 0.4579  |
| chr12:48368073G>A          | 1/1426                                                          | 0/1598                                                          | c.4116C>T          | p.(=)             | 0.4716  |
| chr12:48368174G>T          | 0/1490                                                          | 1/1620                                                          | c.4075-60C>A       |                   | 1.0000  |
| chr12:48369159C>T          | 1/1488                                                          | 0/1620                                                          | c.3827G>A          | p.(Arg1276His)    | 0.4788  |
| chr12:48369250C>T          | 1/1442                                                          | 1/1596                                                          | c.3736G>A          | p.(Gly1246Ser)    | 1.0000  |
| chr12:48369262C>T          | 0/1442                                                          | 1/1596                                                          | c.3724G>A          | p.(Asp1242Asn)    | 1.0000  |
| chr12:48369263G>A          | 1/1442                                                          | 0/1596                                                          | c.3723C>T          | p.(=)             | 0.4747  |
| chr12:48369287G>A          | 1/828                                                           | 0/1046                                                          | c.3699C>T          | p.(=)             | 0.4418  |
| chr12:48369832G>A          | 1/1450                                                          | 0/1588                                                          | c.3511C>T          | p.(Pro1171Ser)    | 0.4773  |
| chr12:48369872G>T          | 1/1444                                                          | 0/1582                                                          | c.3490-19C>A       |                   | 0.4772  |
| chr12:48370870C>T          | 0/1286                                                          | 1/1386                                                          | c.3327+15G>A       |                   | 1.0000  |
| chr12:48370896G>A          | 1/1286                                                          | 0/1386                                                          | c.3316C>T          | p.(Arg1106Trp)    | 0.4813  |
| chr12:48371063C>T          | 1/826                                                           | 0/910                                                           | c.3273+40G>A       |                   | 0.4758  |
| chr12:48371075C>T          | 2/826                                                           | 0/916                                                           | c.3273+28G>A       |                   | 0.2247  |
| chr12:48374400G>A          | 1/400                                                           | 0/616                                                           | c.2562C>T          | p.(=)             | 0.3937  |
| chr12:48375548C>T          | 1/206                                                           | 0/420                                                           | c.2409+11G>A       |                   | 0.3291  |
| chr12:48376305C>T          | 1/448                                                           | 0/626                                                           | c.2281G>A          | p.(Ala761Thr)     | 0.4171  |
| chr12:48376864C>G          | 4/1190                                                          | 1/1426                                                          | c.2094+12G>C       |                   | 0.1839  |
| chr12:48376864C>T          | 1/1188                                                          | 0/1424                                                          | c.2094+12G>A       |                   | 0.4548  |
| chr12:48376876C>G          | 0/1190                                                          | 1/1426                                                          | c.2094G>C          | p.(Arg698Ser)     | 1.0000  |
| chr12:48377957C>T          | 3/1168                                                          | 1/1402                                                          | c.1888-34G>A       |                   | 0.3357  |
| chr12:48379494G>A          | 2/1228                                                          | 0/1358                                                          | c.1680+17C>T       |                   | 0.2254  |
| chr12:48379502G>T          | 2/1228                                                          | 0/1356                                                          | c.1680+9C>A        |                   | 0.2257  |
| chr12:48379503C>A          | 2/1228                                                          | 0/1356                                                          | c.1680+8G>T        |                   | 0.2257  |
| chr12:48379557T>C          | 0/1234                                                          | 1/1358                                                          | c.1634A>G          | p.(Asn545Ser)     | 1.0000  |
| chr12:48379675G>C          | 1/848                                                           | 0/896                                                           | c.1581+20C>G       |                   | 0.4862  |
| chr12:48379722T>C          | 0/1380                                                          | 1/1546                                                          | c.1554A>G          | p.(=)             | 1.0000  |
| chr12:48379804G>A          | 1/1268                                                          | 0/1442                                                          | c.1528-56C>T       |                   | 0.4679  |
| chr12:48380239A>C          | 1/854                                                           | 0/1064                                                          | c.1420-13T>G       |                   | 0.4453  |
| chr12:48380908G>T          | 1/464                                                           | 0/644                                                           | c.1318C>A          | p.(Pro440Thr)     | 0.4188  |
| chr12:48381033del          | 1/990                                                           | 0/1238                                                          | c.1266+19del       |                   | 0.4443  |
| chr12:48381439G>A          | 2/1476                                                          | 1/1616                                                          | c.1176C>T          | p.(=)             | 0.6087  |
| chr12:48383006C>T          | 1/1374                                                          | 0/1486                                                          | c.1122+5G>A        |                   | 0.4804  |
| chr12:48383056G>C          | 0/1374                                                          | 1/1486                                                          | c.1077C>G          | p.(=)             | 1.0000  |
| chr12:48386666C>T          | 0/1490                                                          | 1/1620                                                          | c.1018G>A          | p.(Ala340Thr)     | 1.0000  |
| chr12:48386743A>G          | 0/1490                                                          | 1/1620                                                          | c.970-29T>C        |                   | 1.0000  |
| chr12:48387211T>C          | 1/1490                                                          | 0/1620                                                          | c.969+30A>G        |                   | 0.4791  |
| chr12:48387243T>C          | 0/1490                                                          | 1/1620                                                          | c.967A>G           | p.(Met323Val)     | 1.0000  |
| chr12:48387250C>T          | 0/1490                                                          | 1/1620                                                          | c.960G>A           | p.(=)             | 1.0000  |
| chr12:48387294A>G          | 1/1490                                                          | 0/1620                                                          | c.925-9T>C         |                   | 0.4791  |
| chr12:48387691A>G          | 1/1490                                                          | 0/1620                                                          | c.871-46T>C        |                   | 0.4791  |
| chr12:48387708G>A          | 1/1480                                                          | 0/1620                                                          | c.871-63C>T        |                   | 0.4774  |
| chr12:48387755C>A          | 2/1478                                                          | 0/1620                                                          | c.870+22G>T        |                   | 0.2275  |
| chr12:48388236C>T          | 0/1424                                                          | 1/1534                                                          | c.787G>A           | p.(Ala263Thr)     | 1.0000  |
| chr12:48389107G>A          | 0/1490                                                          | 1/1616                                                          | c.709-16C>T        |                   | 1.0000  |
| chr12:48389461C>T          | 0/1490                                                          | 1/1620                                                          | c.708+32G>A        |                   | 1.0000  |
| chr12:48389485G>A          | 1/1490                                                          | 1/1620                                                          | c.708+8C>T         |                   | 1.0000  |
| chr12:48389710G>A          | 1/1474                                                          | 0/1590                                                          | c.610-8C>T         |                   | 0.4811  |
| chr12:48389717_48389718del | 0/1474                                                          | 1/1588                                                          | c.610-16_610-15del |                   | 1.0000  |
| chr12:48389736A>G          | 1/1474                                                          | 0/1590                                                          | c.610-34T>C        |                   | 0.4811  |
| chr12:48390320T>C          | 1/1490                                                          | 0/1602                                                          | c.609+11A>G        |                   | 0.4819  |
| chr12:48390376A>G          | 1/1490                                                          | 0/1620                                                          | c.564T>C           | p.(=)             | 0.4791  |
| chr12:48390428C>T          | 1/1488                                                          | 0/1620                                                          | c.532-20G>A        |                   | 0.4788  |
| chr12:48391769C>A          | 0/1470                                                          | 1/1582                                                          | c.375+46G>T        |                   | 1.0000  |
| chr12:48391788G>A          | 0/1476                                                          | 1/1586                                                          | c.375+27C>T        |                   | 1.0000  |
| chr12:48391929G>A          | 1/1490                                                          | 1/1620                                                          | c.342+23C>T        |                   | 1.0000  |

|                                |          |          |             |              |        |
|--------------------------------|----------|----------|-------------|--------------|--------|
| chr12:48392004C>T              | 0/1490   | 1/1620   | c.310-20G>A |              | 1.0000 |
| chr12:48392015C>T              | 1/1490   | 0/1620   | c.310-31G>A |              | 0.4791 |
| chr12:48393783C>T              | 1/1486   | 0/1594   | c.211G>A    | p.(Asp71Asn) | 0.4825 |
| chr12:48398075C>G              | 0/1486   | 1/1612   | c.30G>C     | p.(=)        | 1.0000 |
| Sum over all variant positions | 53/78352 | 25/87228 |             |              |        |

MAF = Minor Allele Frequency; chr = chromosome.



**Supplemental table S7.** Identified nonsynonymous variants in *TNXB* with MAF<0.1% in the control population (according to NM\_019105.6). Hg19 was used as reference genome.

| Genomic position               | Variant alleles in patients/<br>Total number of patient alleles | Variant alleles in controls/<br>Total number of control alleles | cDNA change | Amino Acid change | p-value |
|--------------------------------|-----------------------------------------------------------------|-----------------------------------------------------------------|-------------|-------------------|---------|
| chr6:32013984C>T               | 0/1260                                                          | 1/1454                                                          | c.10568G>A  | p.(Arg3523His)    | 1.0000  |
| chr6:32014069C>T               | 2/562                                                           | 0/694                                                           | c.10483G>A  | p.(Ala3495Thr)    | 0.2000  |
| chr6:32016167C>T               | 1/858                                                           | 0/952                                                           | c.10012G>A  | p.(Gly3338Ser)    | 0.4740  |
| chr6:32020479C>T               | 2/1448                                                          | 0/1596                                                          | c.9077G>A   | p.(Arg3026His)    | 0.2262  |
| chr6:32023663C>T               | 1/932                                                           | 0/1040                                                          | c.8432G>A   | p.(Arg2811Gln)    | 0.4726  |
| chr6:32035489C>T               | 0/1062                                                          | 1/1322                                                          | c.6493G>A   | p.(Gly2165Ser)    | 1.0000  |
| chr6:32036313T>A               | 2/1452                                                          | 0/1594                                                          | c.6074A>T   | p.(Asp2025Val)    | 0.2272  |
| chr6:32036733T>C               | 0/1466                                                          | 1/1604                                                          | c.5768A>G   | p.(Gln1923Arg)    | 1.0000  |
| chr6:32037978C>T               | 1/1490                                                          | 0/1620                                                          | c.5204G>A   | p.(Arg1735His)    | 0.4791  |
| chr6:32046842C>T               | 0/1310                                                          | 1/1468                                                          | c.4343G>A   | p.(Arg1448His)    | 1.0000  |
| chr6:32047080A>C               | 1/1468                                                          | 0/1614                                                          | c.4105T>G   | p.(Ser1369Ala)    | 0.4763  |
| chr6:32047085G>A               | 1/1470                                                          | 0/1614                                                          | c.4100C>T   | p.(Pro1367Leu)    | 0.4767  |
| chr6:32049271G>T               | 0/1418                                                          | 1/1576                                                          | c.3916C>A   | p.(Pro1306Thr)    | 1.0000  |
| chr6:32050061C>T               | 6/1488                                                          | 0/1616                                                          | c.3488G>A   | p.(Gly1163Glu)    | 0.0121  |
| chr6:32052255T>C               | 2/1488                                                          | 0/1618                                                          | c.3380A>G   | p.(Lys1127Arg)    | 0.2294  |
| chr6:32057048G>C               | 0/1438                                                          | 1/1580                                                          | c.2467C>G   | p.(Leu823Val)     | 1.0000  |
| chr6:32063547G>A               | 1/1456                                                          | 0/1608                                                          | c.2083C>T   | p.(Arg695Trp)     | 0.4752  |
| chr6:32063793T>C               | 2/1392                                                          | 0/1520                                                          | c.1837A>G   | p.(Ser613Gly)     | 0.2284  |
| chr6:32063858G>A               | 0/1178                                                          | 1/1340                                                          | c.1772C>T   | p.(Pro591Leu)     | 1.0000  |
| chr6:32063891T>C               | 1/1478                                                          | 0/1612                                                          | c.1739A>G   | p.(Tyr580Cys)     | 0.4783  |
| chr6:32065011C>T               | 3/1466                                                          | 0/1606                                                          | c.619G>A    | p.(Gly207Ser)     | 0.1086  |
| Sum over all variant positions | 26/27580                                                        | 7/30648                                                         |             |                   |         |

MAF = Minor Allele Frequency; chr = chromosome.

**Supplemental table S8.** Identified variants in *ZNF469* with MAF<0.1% in the control population (according to NM\_001127464.1). Reference genome is hg19.

| Genomic position               | Variant alleles in patients/<br>Total number of patient alleles | Variant alleles in controls/<br>Total number of control alleles | cDNA change | Amino Acid change | p-value |
|--------------------------------|-----------------------------------------------------------------|-----------------------------------------------------------------|-------------|-------------------|---------|
| chr16:88494303T>A              | 1/438                                                           | 0/630                                                           | c.425T>A    | p.(Leu142Gln)     | 0.4101  |
| chr16:88494638G>A              | 1/712                                                           | 0/822                                                           | c.760G>A    | p.(Glu254Lys)     | 0.4641  |
| chr16:88495425G>C              | 0/1040                                                          | 1/1106                                                          | c.1547G>C   | p.(Gly516Ala)     | 1.0000  |
| chr16:88495426C>T              | 1/1040                                                          | 0/1106                                                          | c.1548C>T   | p.(=)             | 0.4846  |
| chr16:88495462G>A              | 1/1030                                                          | 0/1098                                                          | c.1584G>A   | p.(=)             | 0.4840  |
| chr16:88496440G>A              | 1/566                                                           | 0/734                                                           | c.2562G>A   | p.(=)             | 0.4354  |
| chr16:88496531C>G              | 1/422                                                           | 0/626                                                           | c.2653C>G   | p.(Leu885Val)     | 0.4027  |
| chr16:88498105G>A              | 2/574                                                           | 0/738                                                           | c.4143G>A   | p.(=)             | 0.1912  |
| chr16:88498452G>A              | 1/1048                                                          | 0/1134                                                          | c.4490G>A   | p.(Ser1497Asn)    | 0.4803  |
| chr16:88498459G>A              | 1/1048                                                          | 0/1134                                                          | c.4497G>A   | p.(=)             | 0.4803  |
| chr16:88498965C>T              | 1/1004                                                          | 0/1142                                                          | c.5003C>T   | p.(Pro1668Leu)    | 0.4678  |
| chr16:88499040G>T              | 3/912                                                           | 0/1028                                                          | c.5078G>T   | p.(Cys1693Phe)    | 0.1037  |
| chr16:88499378C>A              | 0/1354                                                          | 1/1506                                                          | c.5416C>A   | p.(His1806Asn)    | 1.0000  |
| chr16:88499416G>A              | 0/1338                                                          | 1/1484                                                          | c.5454G>A   | p.(=)             | 1.0000  |
| chr16:88499426C>A              | 4/1340                                                          | 0/1486                                                          | c.5464C>A   | p.(Pro1822Thr)    | 0.0504  |
| chr16:88499455G>A              | 0/1362                                                          | 1/1516                                                          | c.5493G>A   | p.(=)             | 1.0000  |
| chr16:88499910G>A              | 2/1262                                                          | 0/1380                                                          | c.5948G>A   | p.(Gly1983Asp)    | 0.2281  |
| chr16:88499913C>T              | 1/1260                                                          | 1/1380                                                          | c.5951C>T   | p.(Thr1984Met)    | 1.0000  |
| chr16:88500928T>C              | 1/1066                                                          | 0/1186                                                          | c.6966T>C   | p.(=)             | 0.4734  |
| chr16:88500958G>A              | 0/1066                                                          | 1/1186                                                          | c.6996G>A   | p.(=)             | 1.0000  |
| chr16:88502084G>A              | 1/592                                                           | 0/728                                                           | c.8122G>A   | p.(Asp2708Asn)    | 0.4485  |
| chr16:88502477G>A              | 0/896                                                           | 1/1042                                                          | c.8515G>A   | p.(Gly2839Ser)    | 1.0000  |
| chr16:88502520G>T              | 0/892                                                           | 1/1038                                                          | c.8558G>T   | p.(Arg2853Leu)    | 1.0000  |
| chr16:88502746C>T              | 1/966                                                           | 0/1106                                                          | c.8784C>T   | p.(=)             | 0.4662  |
| chr16:88502957C>T              | 1/422                                                           | 0/618                                                           | c.8995C>T   | p.(=)             | 0.4058  |
| chr16:88503194C>T              | 0/1000                                                          | 1/1162                                                          | c.9232C>T   | p.(Arg3078Trp)    | 1.0000  |
| chr16:88503197C>T              | 1/998                                                           | 0/1160                                                          | c.9235C>T   | p.(Pro3079Ser)    | 0.4625  |
| chr16:88503199G>A              | 1/1000                                                          | 0/1162                                                          | c.9237G>A   | p.(=)             | 0.4625  |
| chr16:88503477G>A              | 2/364                                                           | 0/526                                                           | c.9515G>A   | p.(Arg3172His)    | 0.1670  |
| chr16:88503869G>T              | 1/538                                                           | 0/814                                                           | c.9907G>T   | p.(Ala3303Ser)    | 0.3979  |
| chr16:88504396G>A              | 4/762                                                           | 0/830                                                           | c.10434G>A  | p.(=)             | 0.0523  |
| chr16:88504421G>A              | 1/472                                                           | 0/638                                                           | c.10459G>A  | p.(Val3487Met)    | 0.4252  |
| chr16:88504477C>T              | 2/896                                                           | 0/1000                                                          | c.10515C>T  | p.(=)             | 0.2232  |
| chr16:88504534G>A              | 2/904                                                           | 1/1018                                                          | c.10572G>A  | p.(=)             | 0.6039  |
| chr16:88504536C>T              | 2/906                                                           | 0/1018                                                          | c.10574C>T  | p.(Pro3525Leu)    | 0.2216  |
| chr16:88504586G>A              | 2/1064                                                          | 0/1202                                                          | c.10624G>A  | p.(Ala3542Thr)    | 0.2204  |
| chr16:88504604G>C              | 1/1064                                                          | 0/1204                                                          | c.10642G>C  | p.(Glu3548Gln)    | 0.4691  |
| chr16:88504686G>A              | 2/1402                                                          | 0/1584                                                          | c.10724G>A  | p.(Arg3575Gln)    | 0.2204  |
| chr16:88504733G>A              | 0/1364                                                          | 1/1526                                                          | c.10771G>A  | p.(Val3591Met)    | 1.0000  |
| chr16:88504733G>C              | 0/1364                                                          | 1/1526                                                          | c.10771G>C  | p.(Val3591Leu)    | 1.0000  |
| chr16:88504858G>A              | 1/1210                                                          | 0/1322                                                          | c.10896G>A  | p.(=)             | 0.4779  |
| chr16:88504985G>T              | 1/536                                                           | 0/684                                                           | c.11023G>T  | p.(Val3675Leu)    | 0.4393  |
| chr16:88505256C>T              | 1/1054                                                          | 0/1170                                                          | c.11294C>T  | p.(Pro3765Leu)    | 0.4739  |
| chr16:88505444C>T              | 1/422                                                           | 0/588                                                           | c.11482C>T  | p.(Arg3828Cys)    | 0.4178  |
| Sum over all variant positions | 50/40970                                                        | 12/47088                                                        |             |                   |         |

MAF = Minor Allele Frequency; chr = chromosome.

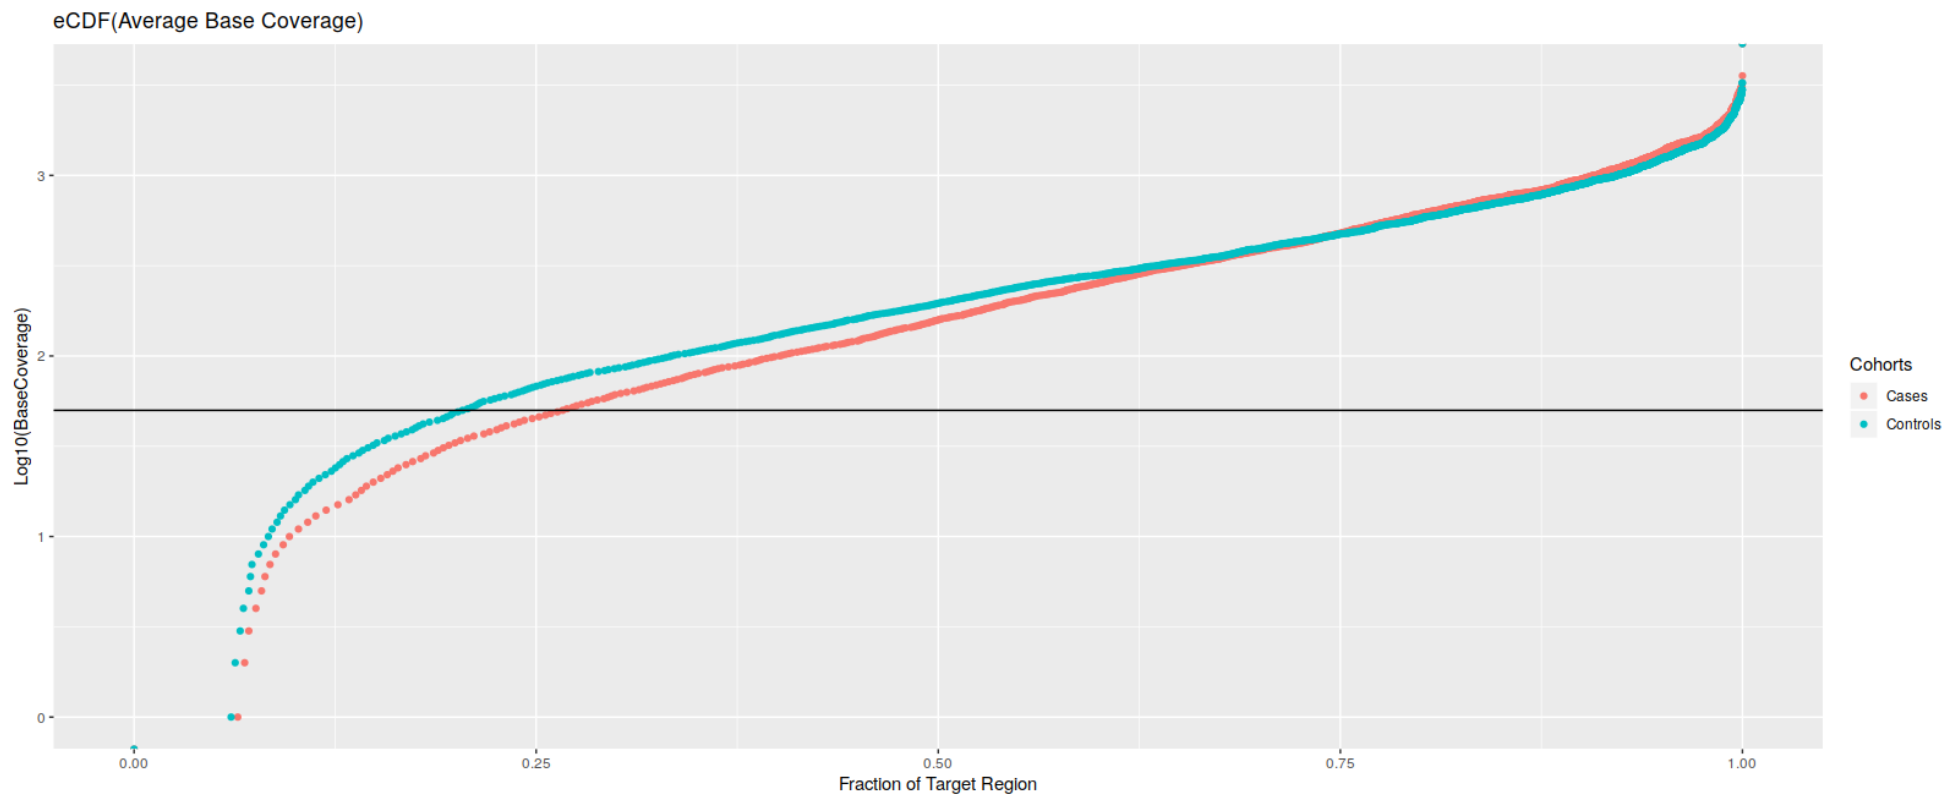

**Supplemental figure S1.** Average base coverage for the target region for case and control samples.

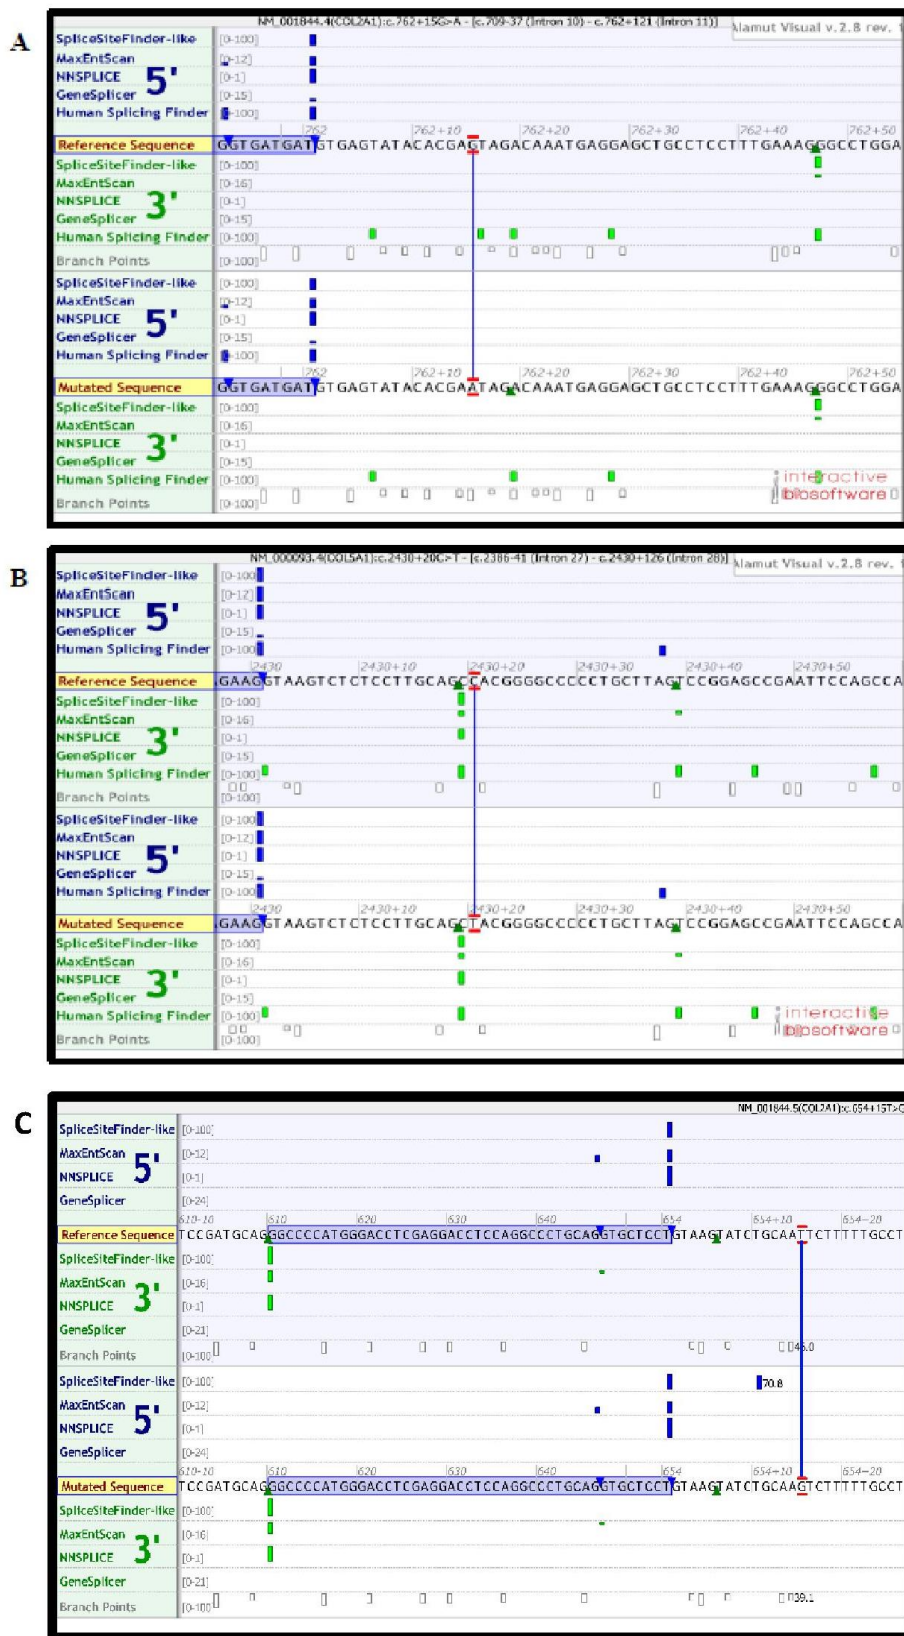

**Supplemental figure S2.** Predictions of the effect on splicing of the three variants located in the exon-intron boundaries and ranking in the top-15 of single SNP association tests.

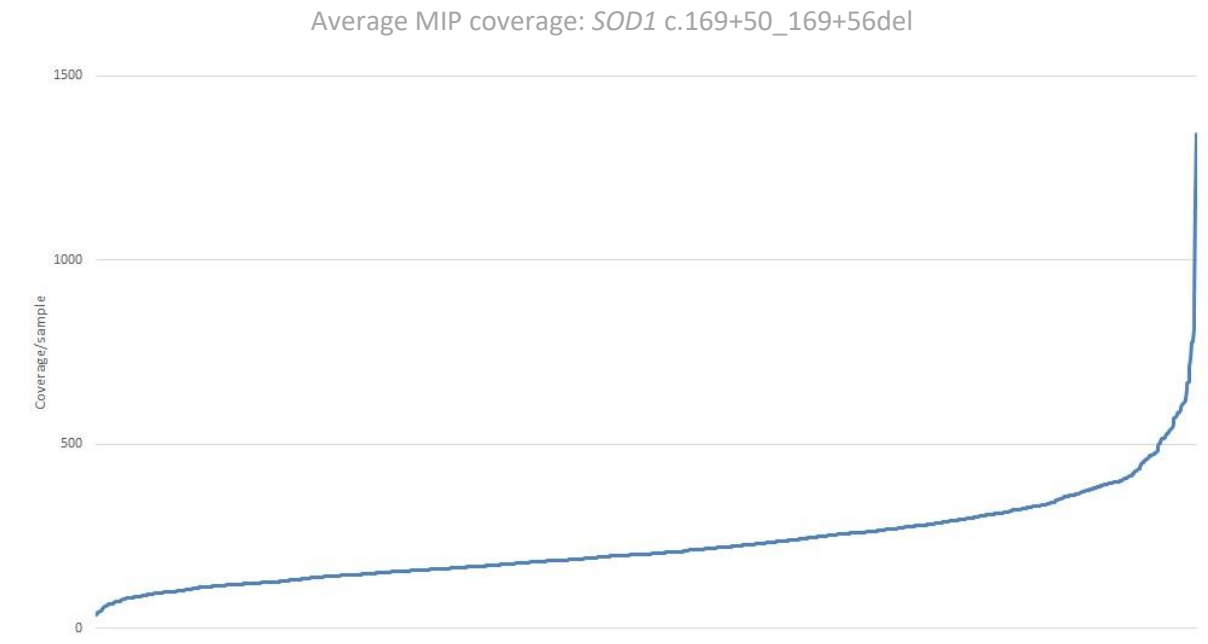

**Supplemental figure S3.** Coverage of the MIP probe targeting the reported *SOD1* c.169+50\_169+56del variant for all included samples. Hg19 was used as reference genome (NC\_000021.8).

**A**

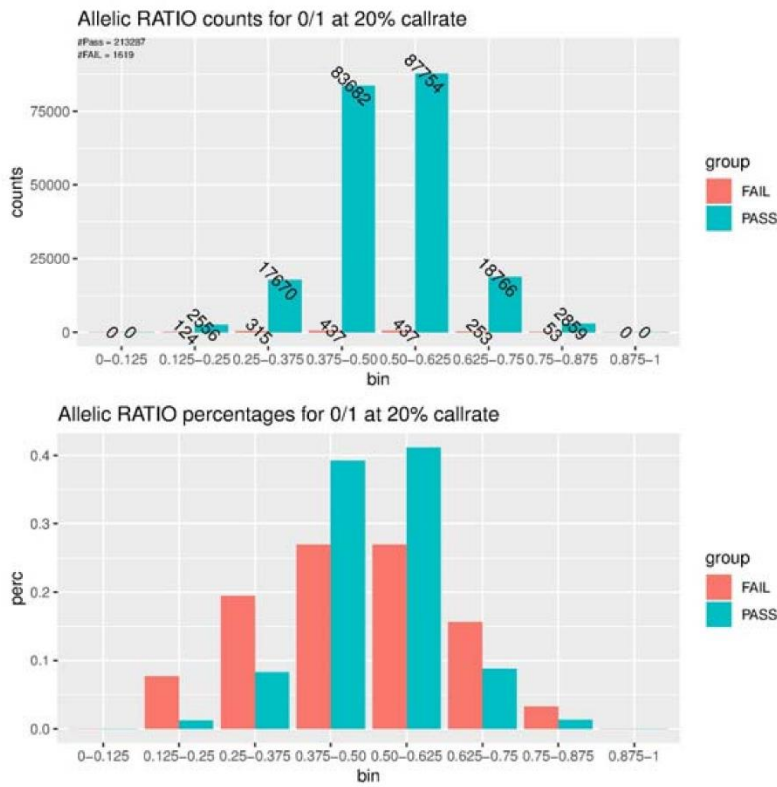

**B**

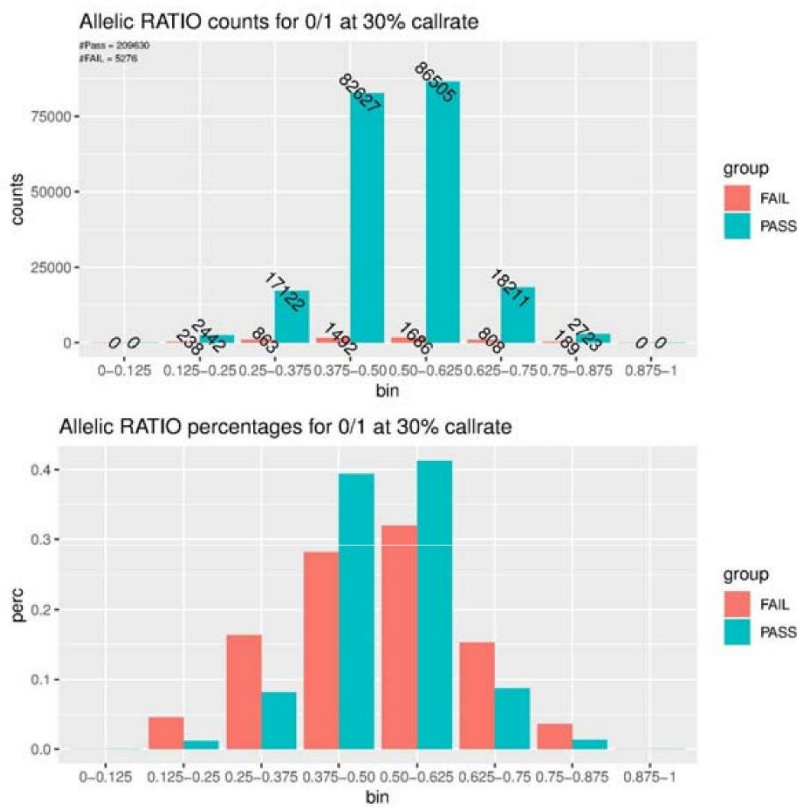

**Supplemental figure S4.** Histograms of variants passing and failing the criterion.

# Average Coverage Overview

## Transcript summary

| Gene      | Transcript     | Size     | Median.Cov | Avg.%@50X | 95%CI(%@50X)  |
|-----------|----------------|----------|------------|-----------|---------------|
| COL12A1   | NM_004370.5    | 10,492bp | 531.7X     | 89.7%     | (89.5%,90%)   |
| COL12A1   | NM_080645.2    | 6,700bp  | 495X       | 89.5%     | (89.3%,89.8%) |
| COL2A1    | NM_001844.4    | 5,544bp  | 82X        | 65.2%     | (64.4%,66%)   |
| COL2A1    | NM_033150.2    | 5,317bp  | 82X        | 65.7%     | (64.9%,66.5%) |
| COL5A1    | NM_000093.4    | 6,837bp  | 88.5X      | 70.2%     | (69.4%,71.1%) |
| COL5A1    | NM_001278074.1 | 6,837bp  | 86X        | 69.2%     | (68.4%,70.1%) |
| COL5A3    | NM_015719.3    | 6,578bp  | 107X       | 70%       | (69.4%,70.6%) |
| DCAF11    | NM_001163484.1 | 1,921bp  | 374.5X     | 95.9%     | (95.6%,96.1%) |
| DCAF11    | NM_025230.4    | 1,921bp  | 374.5X     | 95.9%     | (95.6%,96.1%) |
| DCAF11    | NM_181357.2    | 1,843bp  | 391X       | 95.7%     | (95.5%,96%)   |
| DOCK1     | NM_001290223.1 | 6,701bp  | 699X       | 93.7%     | (93.5%,93.8%) |
| DOCK1     | NM_001380.4    | 6,638bp  | 706X       | 94.5%     | (94.4%,94.7%) |
| DOCK9     | NM_001130048.1 | 7,347bp  | 561X       | 93%       | (92.8%,93.2%) |
| DOCK9     | NM_001130049.1 | 4,425bp  | 644.5X     | 91%       | (90.9%,91.2%) |
| DOCK9     | NM_001130050.1 | 4,422bp  | 655.5X     | 93.7%     | (93.6%,93.9%) |
| DOCK9     | NM_001318849.1 | 7,261bp  | 559X       | 91.3%     | (91.1%,91.5%) |
| DOCK9     | NM_015296.2    | 7,350bp  | 551.5X     | 91.4%     | (91.2%,91.6%) |
| EPPK1     | NM_031308.3    | 7,300bp  | 44X        | 49.4%     | (48.1%,50.7%) |
| FASLG     | NM_000639.2    | 926bp    | 313X       | 97.2%     | (96.8%,97.6%) |
| FASLG     | NM_001302746.1 | 424bp    | 170X       | 95.4%     | (94.7%,96%)   |
| FNDC3B    | NM_001135095.1 | 4,115bp  | 717X       | 95.4%     | (95.2%,95.6%) |
| FNDC3B    | NM_022763.3    | 4,115bp  | 717X       | 95.4%     | (95.2%,95.6%) |
| FOXO1     | NM_002015.3    | 2,008bp  | 143X       | 66.2%     | (65.8%,66.6%) |
| HLA-G     | NM_002127.5    | 1,137bp  | 120X       | 68.8%     | (68.2%,69.4%) |
| IL1RN     | NM_000577.4    | 580bp    | 545X       | 99.2%     | (99.1%,99.4%) |
| IL1RN     | NM_001318914.1 | 512bp    | 551X       | 99.5%     | (99.4%,99.6%) |
| IL1RN     | NM_173841.2    | 663bp    | 493X       | 99.3%     | (99.2%,99.5%) |
| IL1RN     | NM_173842.2    | 614bp    | 496X       | 99%       | (98.8%,99.2%) |
| IL1RN     | NM_173843.2    | 512bp    | 551X       | 99.5%     | (99.4%,99.6%) |
| LAMC3     | NM_006059.3    | 5,288bp  | 172X       | 79.6%     | (79.1%,80.1%) |
| LCA5      | NM_001122769.2 | 2,234bp  | 570.5X     | 96.4%     | (96.2%,96.6%) |
| LCA5      | NM_181714.3    | 2,234bp  | 570.5X     | 96.4%     | (96.2%,96.6%) |
| LOX       | NM_001178102.2 | 684bp    | 586X       | 93.7%     | (93.2%,94.1%) |
| LOX       | NM_001317073.1 | 443bp    | 569X       | 94.1%     | (93.6%,94.5%) |
| LOX       | NM_002317.6    | 1,394bp  | 304X       | 92.6%     | (92.1%,93.1%) |
| LOXHD1    | NM_001145472.2 | 3,785bp  | 388X       | 86.2%     | (86%,86.4%)   |
| LOXHD1    | NM_001145473.2 | 1,699bp  | 243X       | 76.4%     | (76%,76.7%)   |
| LOXHD1    | NM_001173129.1 | 1,554bp  | 299X       | 79.1%     | (78.8%,79.4%) |
| LOXHD1    | NM_001308013.1 | 3,416bp  | 396X       | 87.4%     | (87.2%,87.6%) |
| LOXHD1    | NM_144612.6    | 7,436bp  | 376X       | 88.6%     | (88.4%,88.9%) |
| MIR184.nc | NR_029705.1    | 104bp    | 203.2X     | 91.7%     | (90.8%,92.5%) |
| MMP9      | NM_004994.2    | 2,384bp  | 39X        | 46.2%     | (45.1%,47.2%) |
| NLRP1     | NM_001033053.2 | 4,448bp  | 445.5X     | 91.4%     | (91.1%,91.7%) |
| NLRP1     | NM_014922.4    | 4,610bp  | 451X       | 93%       | (92.7%,93.3%) |
| NLRP1     | NM_033004.3    | 4,762bp  | 449X       | 91.9%     | (91.6%,92.3%) |
| NLRP1     | NM_033006.3    | 4,652bp  | 445X       | 91.8%     | (91.5%,92.2%) |
| NLRP1     | NM_033007.3    | 4,500bp  | 446X       | 92.9%     | (92.6%,93.3%) |
| P3H4      | NM_006455.2    | 1,474bp  | 50X        | 55%       | (54%,55.9%)   |
| PARP1     | NM_001618.3    | 3,505bp  | 411X       | 92.8%     | (92.5%,93%)   |
| PARP2     | NM_001042618.1 | 2,033bp  | 604X       | 89.1%     | (88.9%,89.4%) |
| PARP2     | NM_005484.3    | 2,072bp  | 617.5X     | 89.3%     | (89.1%,89.6%) |
| PRPH2     | NM_000322.4    | 1,101bp  | 372X       | 97.9%     | (97.6%,98.2%) |
| RDH13     | NM_001145971.1 | 1,136bp  | 153.7X     | 85%       | (84.4%,85.6%) |
| RDH13     | NM_138412.3    | 883bp    | 164.5X     | 83.9%     | (83.3%,84.5%) |
| SLC4A11   | NM_001174089.1 | 3,028bp  | 43X        | 48.8%     | (47.5%,50.1%) |
| SLC4A11   | NM_001174090.1 | 3,157bp  | 44X        | 49.1%     | (47.8%,50.4%) |
| SLC4A11   | NM_032034.3    | 3,056bp  | 42X        | 48.3%     | (47%,49.6%)   |
| SOD1      | NM_000454.4    | 565bp    | 250X       | 89.2%     | (88.9%,89.5%) |
| TF        | NM_001063.3    | 2,437bp  | 396.5X     | 93%       | (92.7%,93.4%) |
| TGFBI     | NM_000358.2    | 2,392bp  | 361.7X     | 90.7%     | (90.3%,91.2%) |

Continued on next page

| Gene   | Transcript     | Size     | Median.Cov | Avg.%@50X | 95%CI(%@50X)  |
|--------|----------------|----------|------------|-----------|---------------|
| TNXB   | NM_019105.6    | 13,589bp | 48X        | 49.8%     | (49%,50.6%)   |
| TNXB   | NM_032470.3    | 2,282bp  | 11X        | 31.6%     | (30.8%,32.3%) |
| VSX1   | NM_001256271.1 | 791bp    | 79X        | 60.9%     | (60.2%,61.6%) |
| VSX1   | NM_001256272.1 | 1,006bp  | 96X        | 67%       | (66.3%,67.7%) |
| VSX1   | NM_014588.5    | 1,198bp  | 108X       | 69.4%     | (68.8%,70%)   |
| VSX1   | NM_199425.2    | 780bp    | 103X       | 60.9%     | (60.3%,61.6%) |
| WNT10A | NM_025216.2    | 1,334bp  | 22X        | 29.9%     | (28.8%,31.1%) |
| ZEB1   | NM_001128128.2 | 3,507bp  | 445X       | 93.8%     | (93.5%,94%)   |
| ZEB1   | NM_001174093.1 | 3,475bp  | 448X       | 91.5%     | (91.3%,91.8%) |
| ZEB1   | NM_001174094.1 | 3,504bp  | 445X       | 93.8%     | (93.5%,94%)   |
| ZEB1   | NM_001174095.1 | 3,334bp  | 432X       | 91.4%     | (91.1%,91.6%) |
| ZEB1   | NM_001174096.1 | 3,558bp  | 437X       | 91.7%     | (91.4%,91.9%) |
| ZEB1   | NM_001323638.1 | 2,821bp  | 436X       | 93%       | (92.7%,93.2%) |
| ZEB1   | NM_001323641.1 | 2,821bp  | 436X       | 93%       | (92.7%,93.2%) |
| ZEB1   | NM_001323642.1 | 2,821bp  | 436X       | 93%       | (92.7%,93.2%) |
| ZEB1   | NM_001323643.1 | 2,821bp  | 436X       | 93%       | (92.7%,93.2%) |
| ZEB1   | NM_001323644.1 | 2,821bp  | 436X       | 93%       | (92.7%,93.2%) |
| ZEB1   | NM_001323645.1 | 2,821bp  | 436X       | 93%       | (92.7%,93.2%) |
| ZEB1   | NM_001323646.1 | 2,821bp  | 436X       | 93%       | (92.7%,93.2%) |
| ZEB1   | NM_001323647.1 | 2,821bp  | 436X       | 93%       | (92.7%,93.2%) |
| ZEB1   | NM_001323648.1 | 2,821bp  | 436X       | 93%       | (92.7%,93.2%) |
| ZEB1   | NM_001323649.1 | 2,821bp  | 436X       | 93%       | (92.7%,93.2%) |
| ZEB1   | NM_001323650.1 | 2,821bp  | 436X       | 93%       | (92.7%,93.2%) |
| ZEB1   | NM_001323651.1 | 2,821bp  | 436X       | 93%       | (92.7%,93.2%) |
| ZEB1   | NM_001323652.1 | 2,821bp  | 436X       | 93%       | (92.7%,93.2%) |
| ZEB1   | NM_001323653.1 | 2,821bp  | 436X       | 93%       | (92.7%,93.2%) |
| ZEB1   | NM_001323654.1 | 2,821bp  | 436X       | 93%       | (92.7%,93.2%) |
| ZEB1   | NM_001323655.1 | 2,821bp  | 436X       | 93%       | (92.7%,93.2%) |
| ZEB1   | NM_001323656.1 | 2,821bp  | 436X       | 93%       | (92.7%,93.2%) |
| ZEB1   | NM_001323657.1 | 2,821bp  | 436X       | 93%       | (92.7%,93.2%) |
| ZEB1   | NM_001323658.1 | 2,821bp  | 436X       | 93%       | (92.7%,93.2%) |
| ZEB1   | NM_001323659.1 | 2,821bp  | 436X       | 93%       | (92.7%,93.2%) |
| ZEB1   | NM_001323660.1 | 2,821bp  | 436X       | 93%       | (92.7%,93.2%) |
| ZEB1   | NM_001323661.1 | 2,821bp  | 436X       | 93%       | (92.7%,93.2%) |
| ZEB1   | NM_001323662.1 | 2,821bp  | 436X       | 93%       | (92.7%,93.2%) |
| ZEB1   | NM_001323663.1 | 2,821bp  | 436X       | 93%       | (92.7%,93.2%) |
| ZEB1   | NM_001323664.1 | 2,821bp  | 436X       | 93%       | (92.7%,93.2%) |
| ZEB1   | NM_001323665.1 | 2,821bp  | 436X       | 93%       | (92.7%,93.2%) |
| ZEB1   | NM_001323666.1 | 2,821bp  | 436X       | 93%       | (92.7%,93.2%) |
| ZEB1   | NM_001323671.1 | 2,821bp  | 436X       | 93%       | (92.7%,93.2%) |
| ZEB1   | NM_001323672.1 | 2,821bp  | 436X       | 93%       | (92.7%,93.2%) |
| ZEB1   | NM_001323673.1 | 2,821bp  | 436X       | 93%       | (92.7%,93.2%) |
| ZEB1   | NM_001323674.1 | 3,293bp  | 424X       | 91.1%     | (90.8%,91.3%) |
| ZEB1   | NM_001323675.1 | 3,251bp  | 430X       | 92.3%     | (92%,92.5%)   |
| ZEB1   | NM_001323676.1 | 3,516bp  | 442.5X     | 92.8%     | (92.5%,93%)   |
| ZEB1   | NM_001323677.1 | 3,513bp  | 443X       | 92.8%     | (92.5%,93%)   |
| ZEB1   | NM_001323678.1 | 3,242bp  | 431X       | 93.3%     | (93.1%,93.6%) |
| ZEB1   | NM_030751.5    | 3,555bp  | 437X       | 91.7%     | (91.4%,91.9%) |
| ZNF469 | NM_001127464   | 11,902bp | 18X        | 29.8%     | (28.5%,31.2%) |



# Detailed Coverage Plots

NOTE: In the Coverage plots below, the confidence intervals correspond to 2.5% and 97.5% Quantiles. The black line corresponds to the population median. The red line represents the 50x coverage target. Grey bars represent the MIPS used to capture the region.

## Exon Overview: COL12A1 : NM\_004370.5

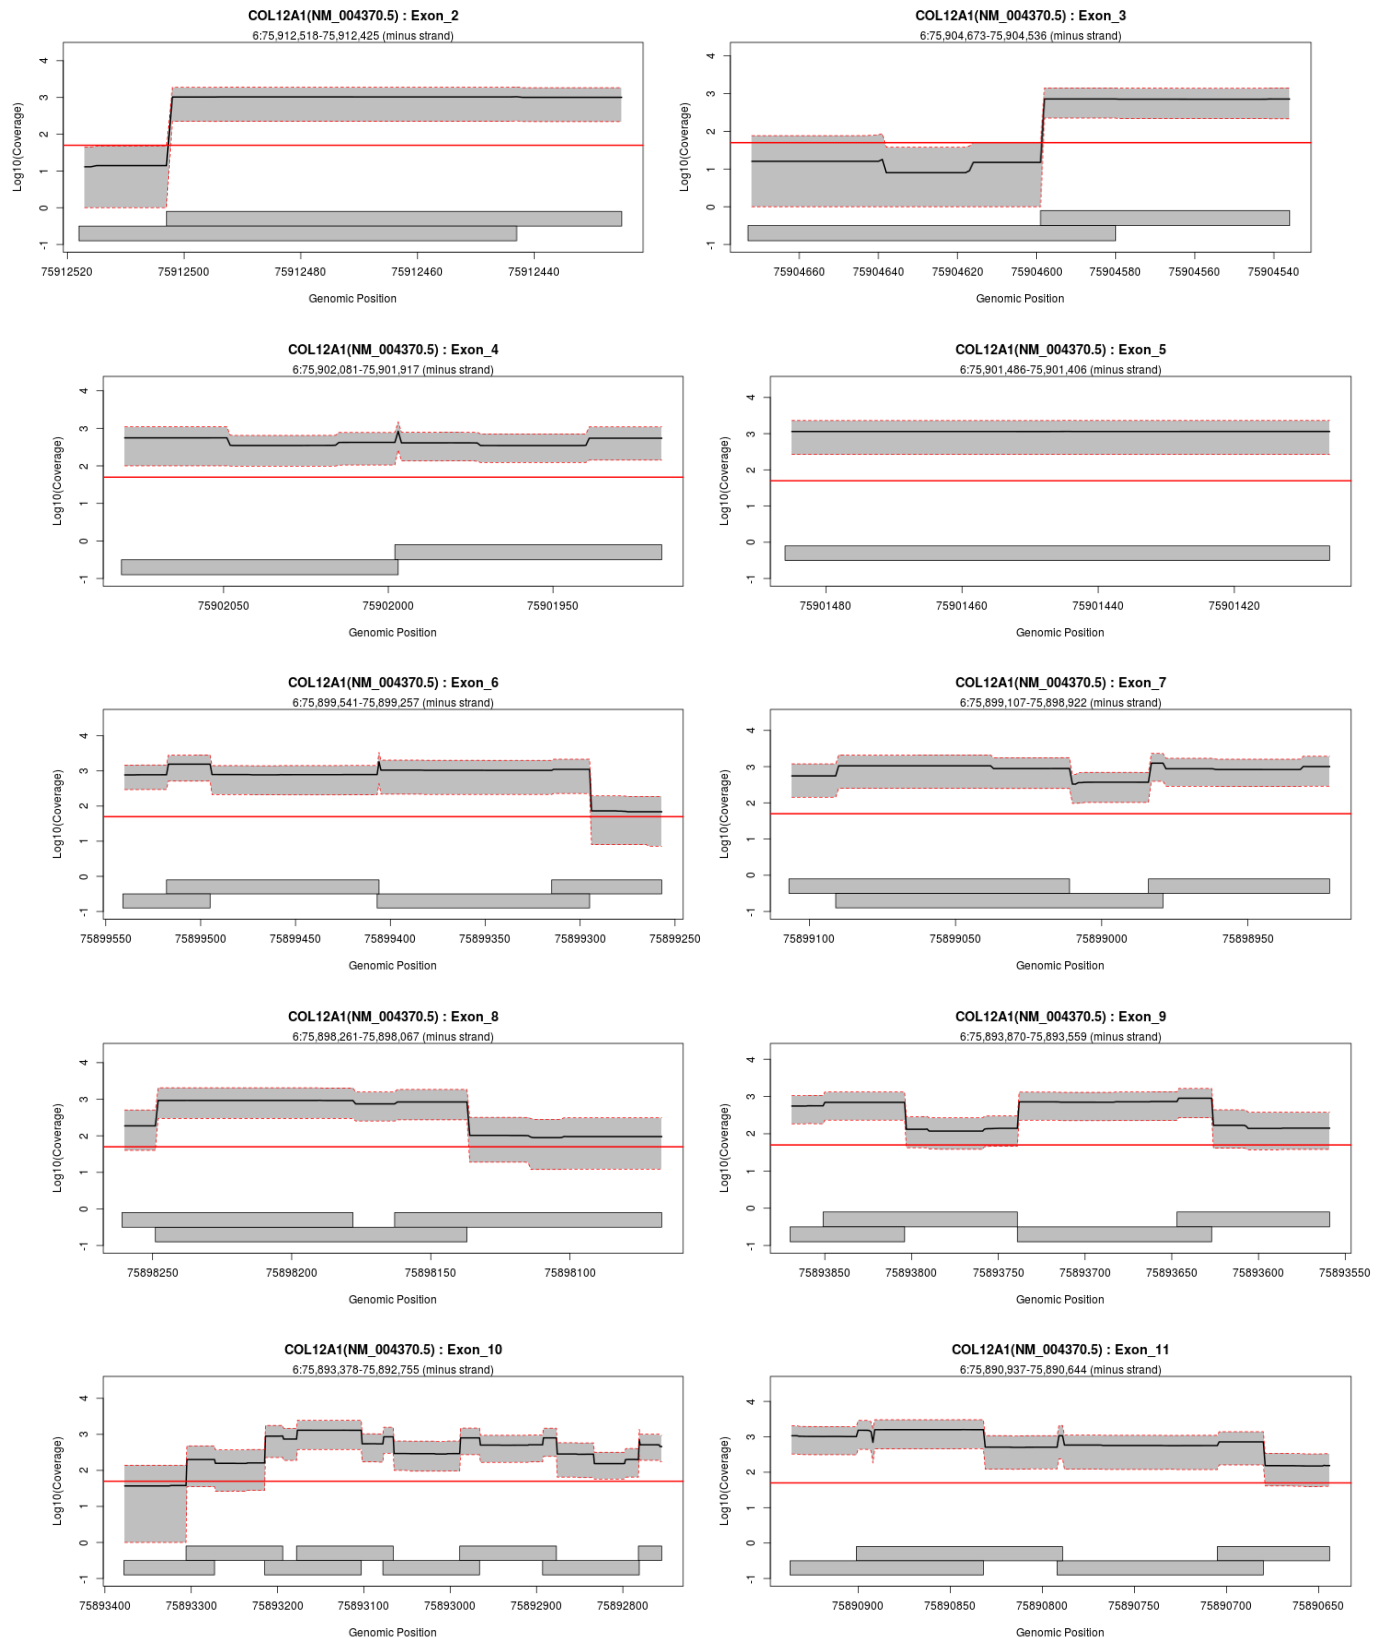

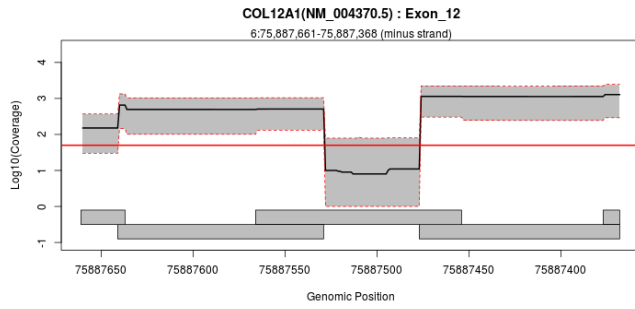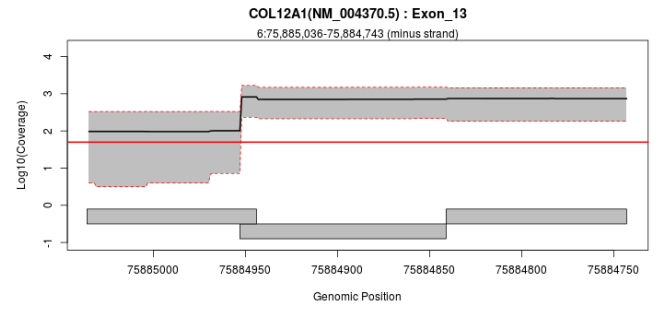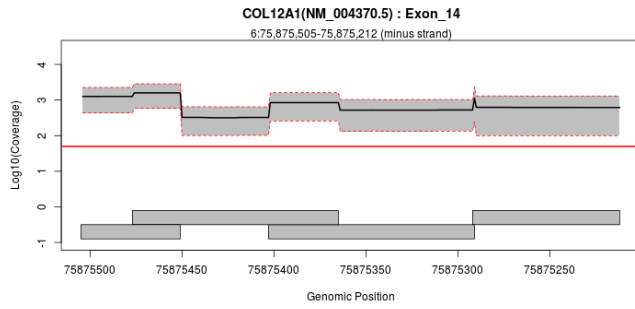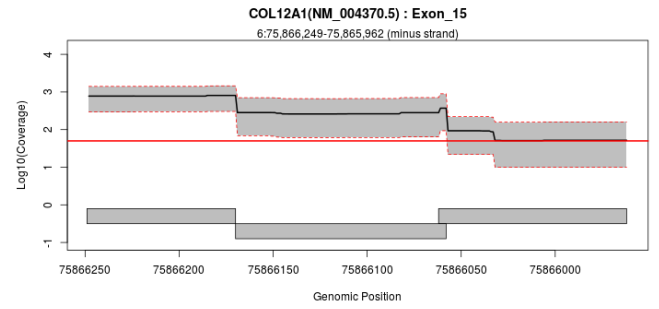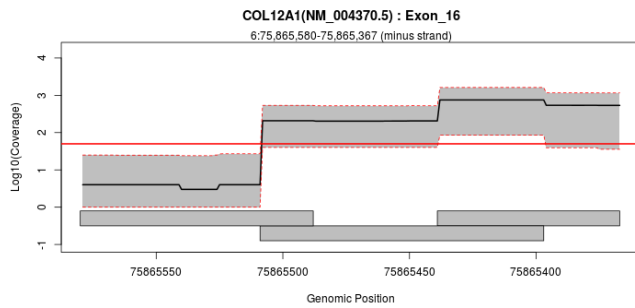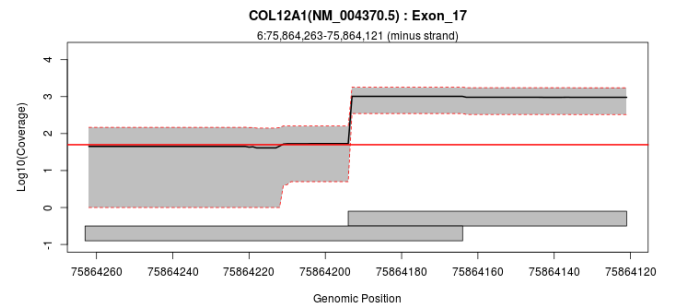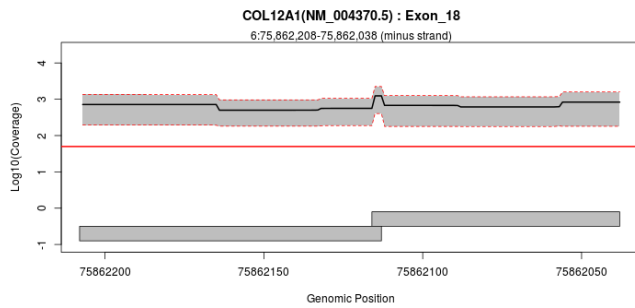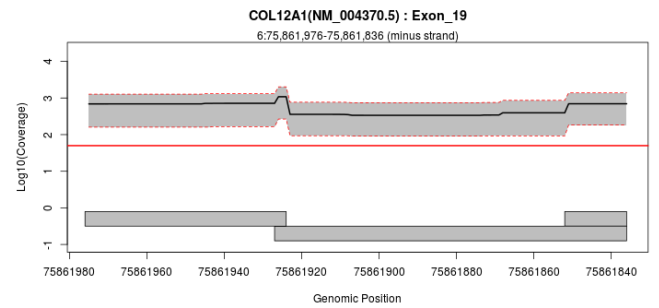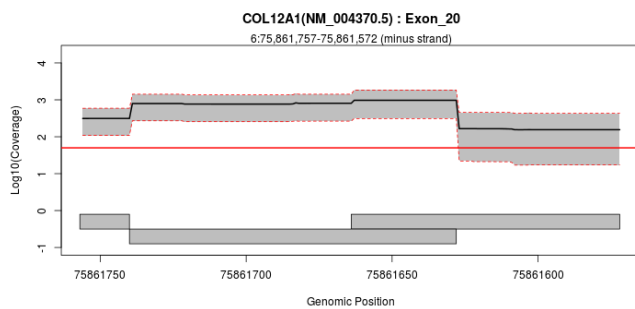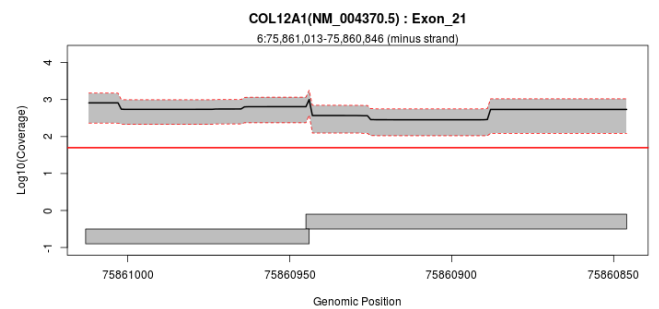

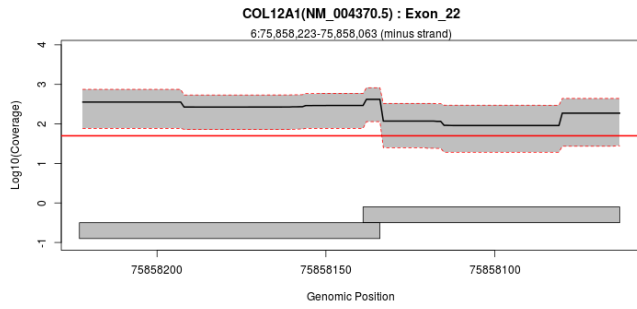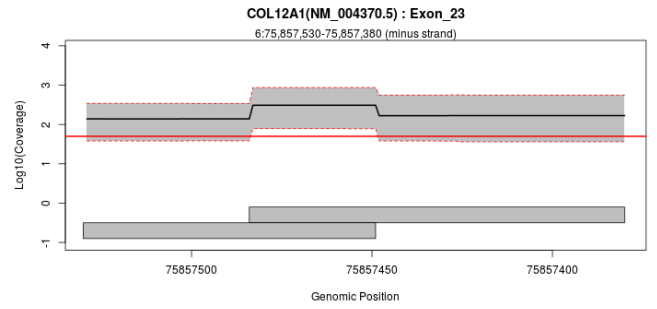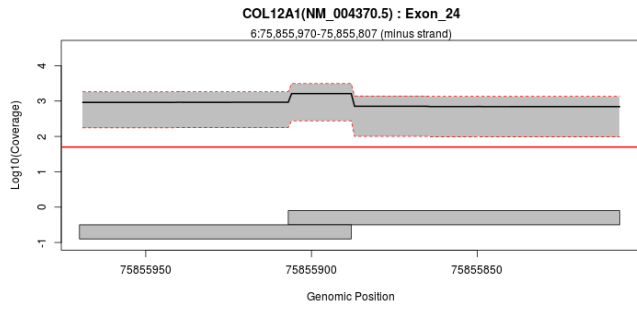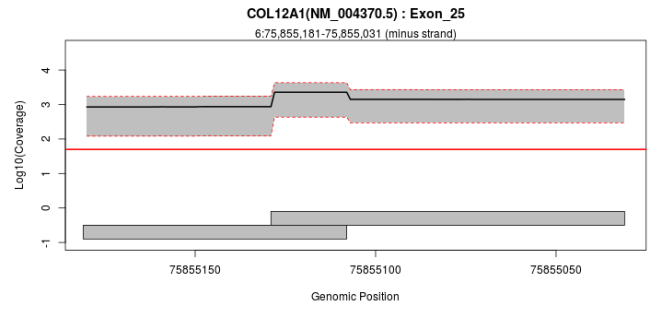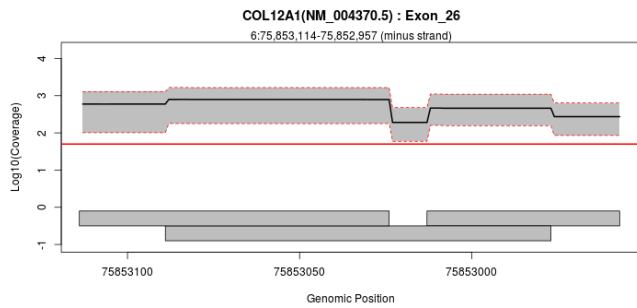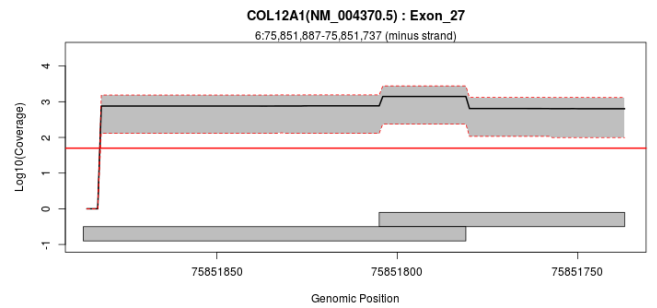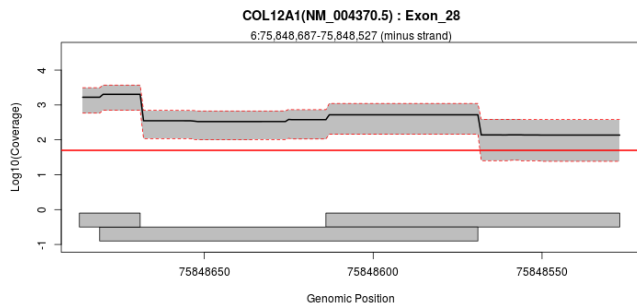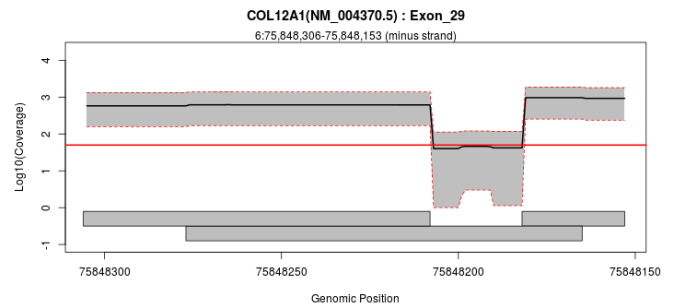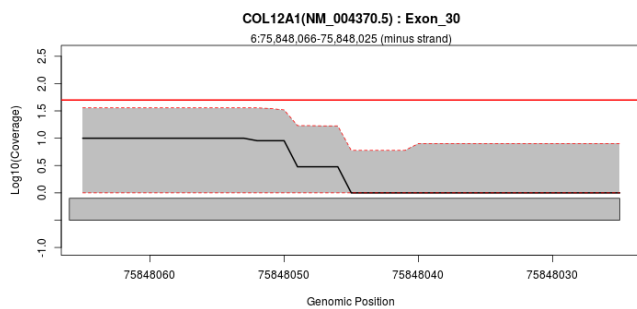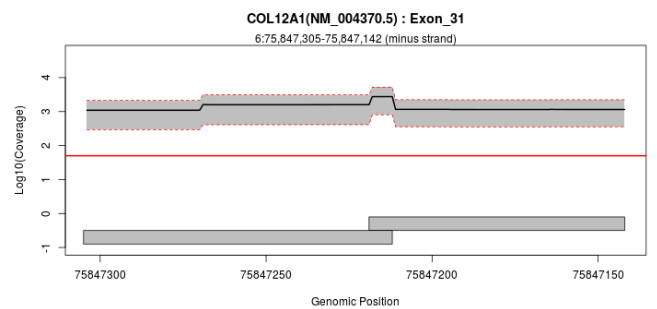

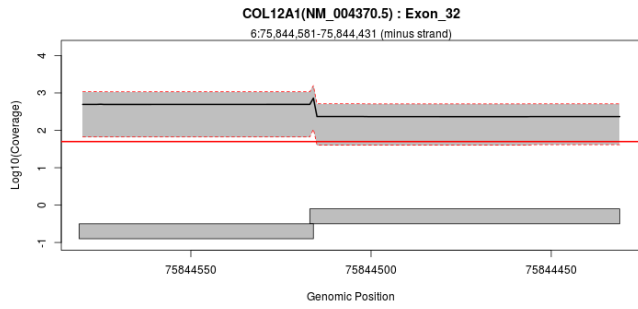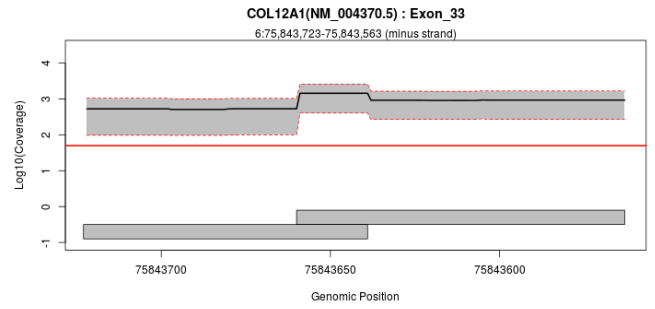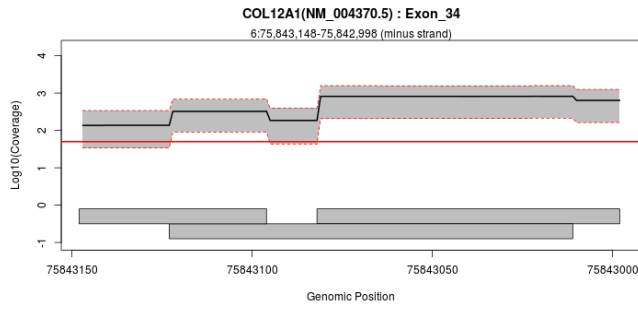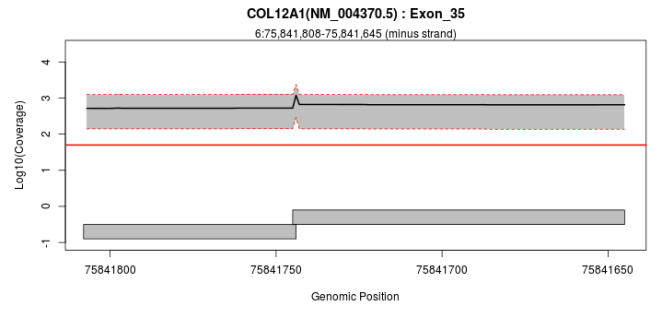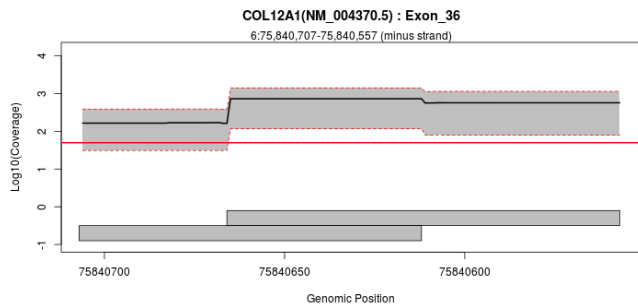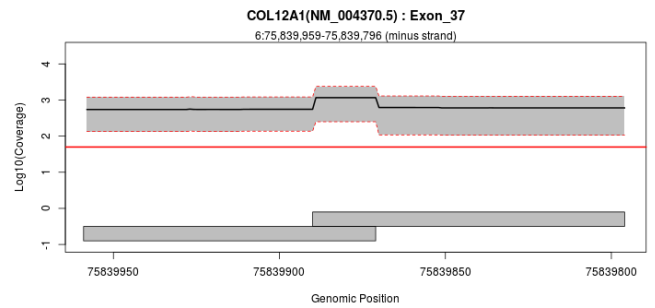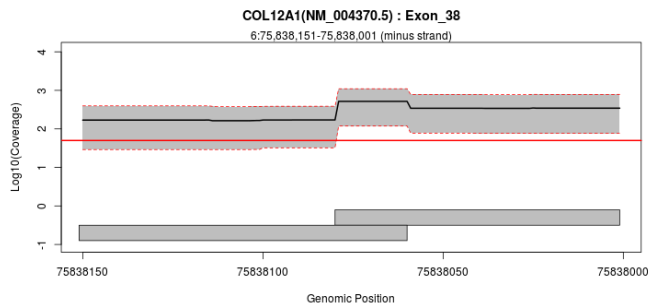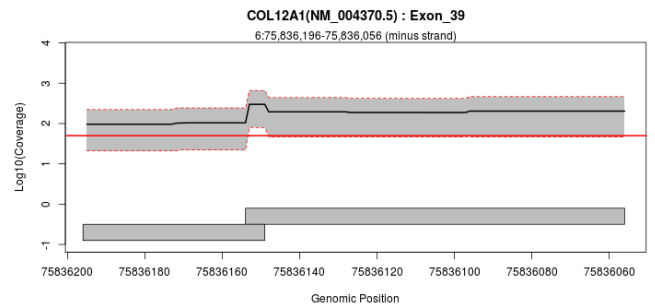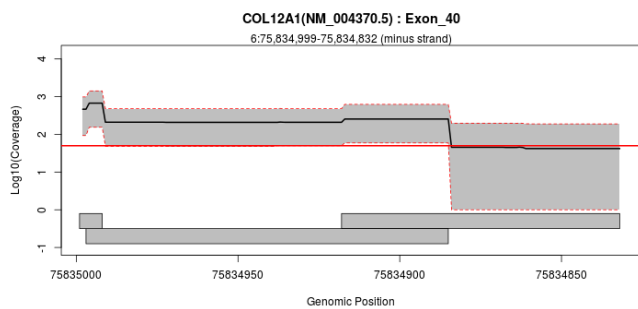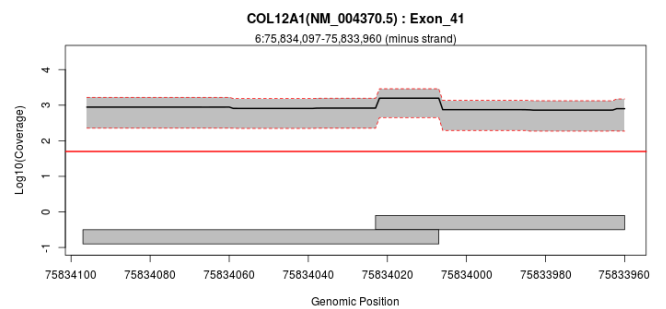

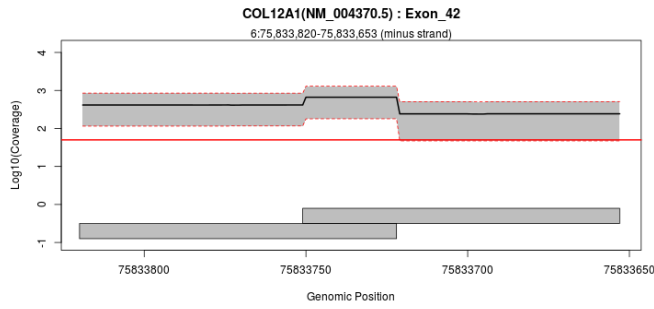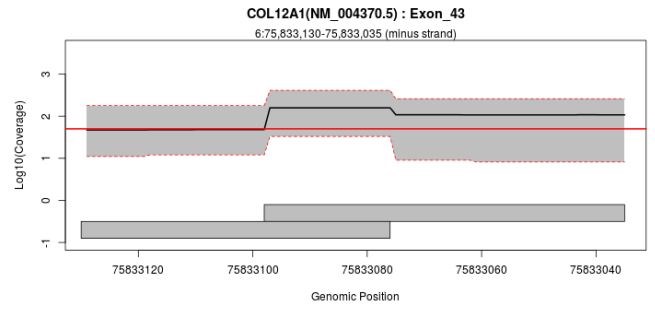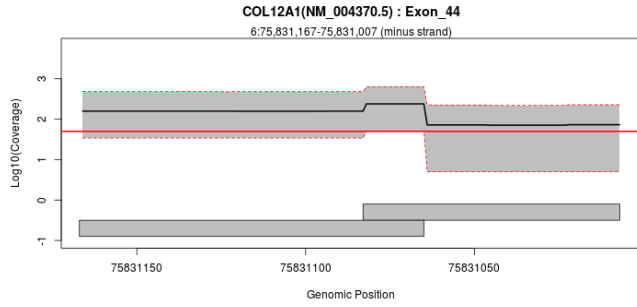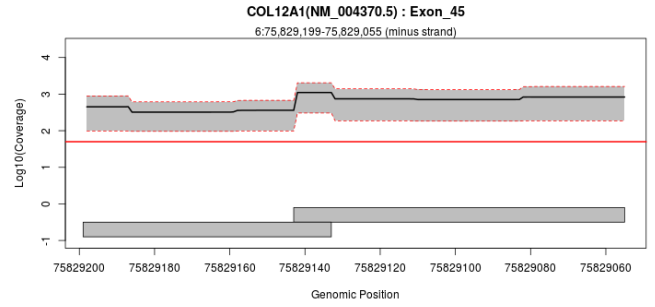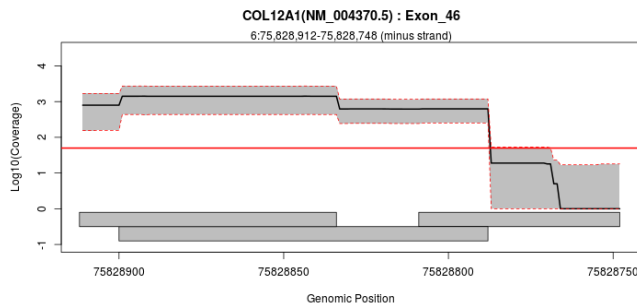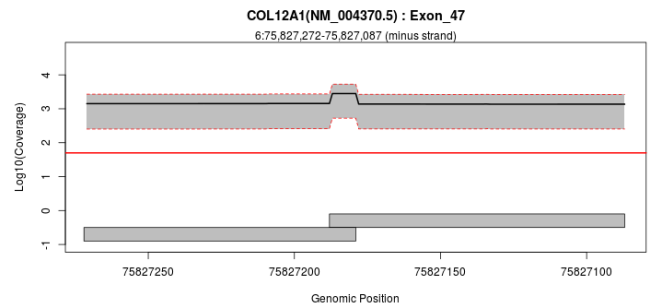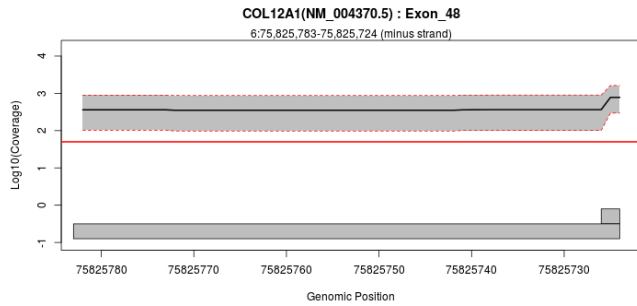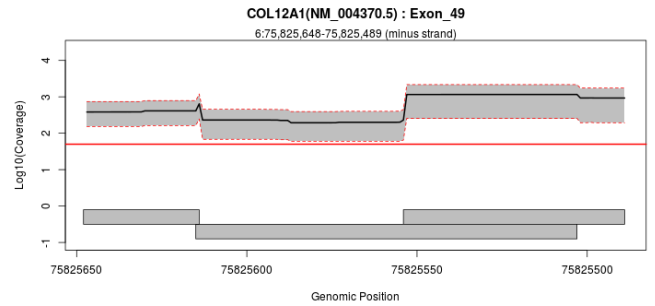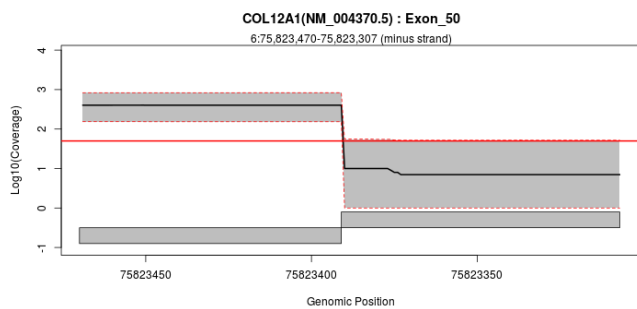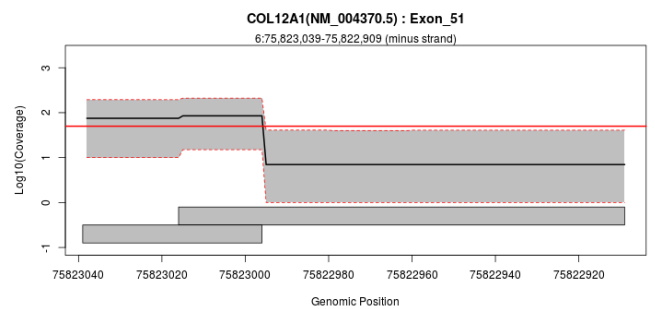

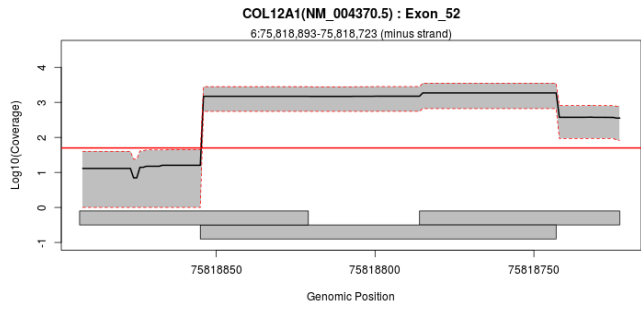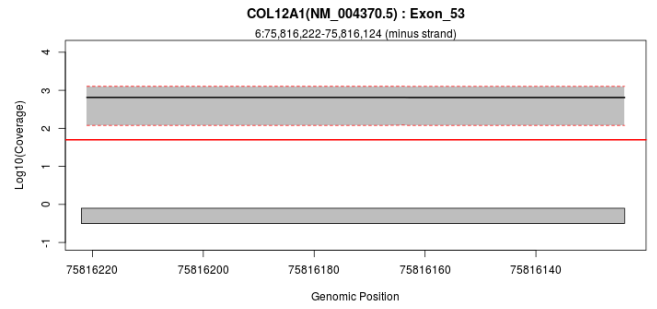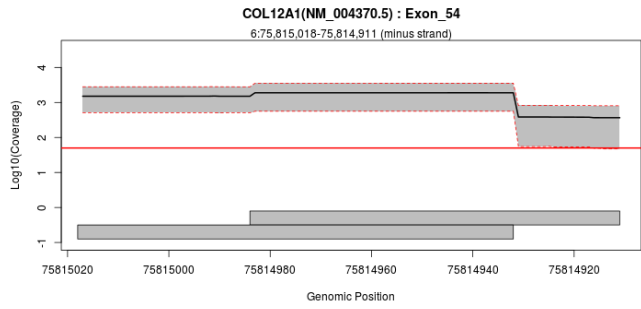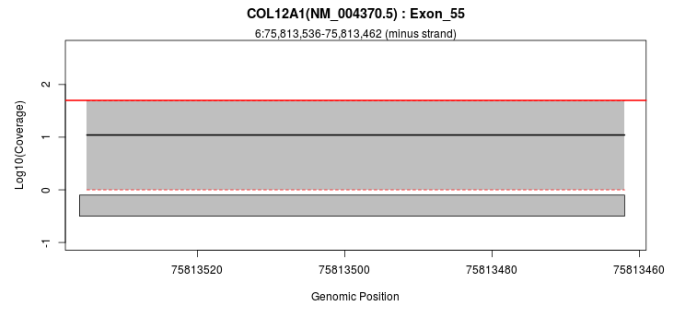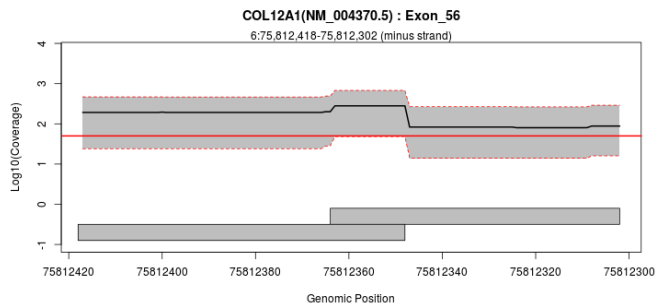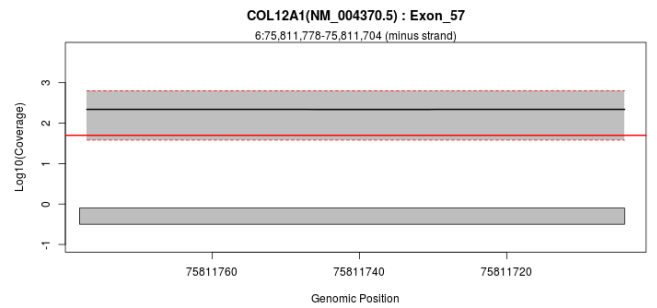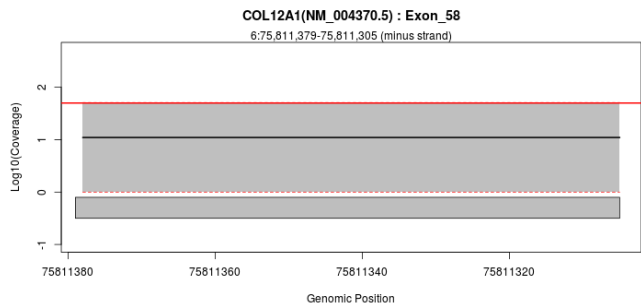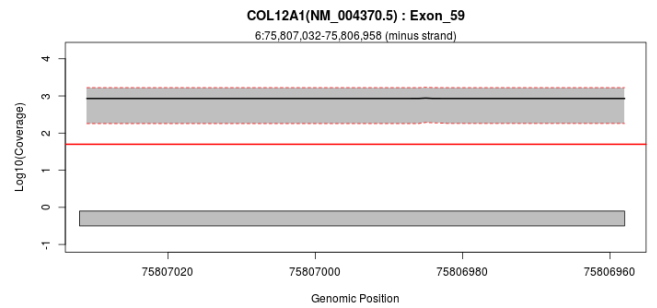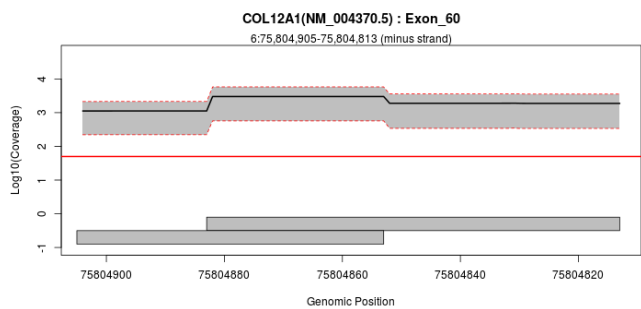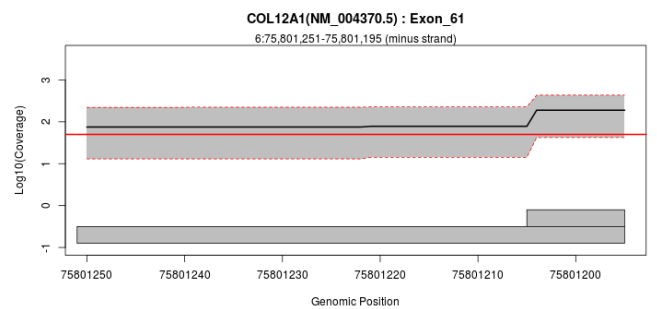

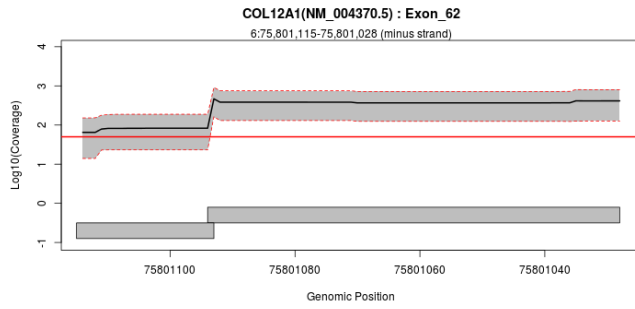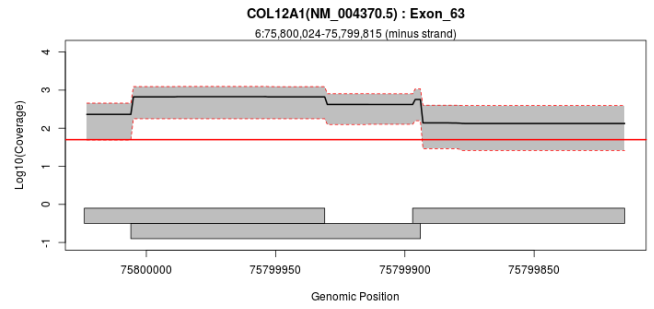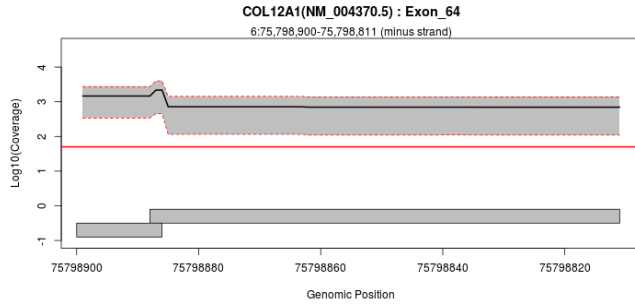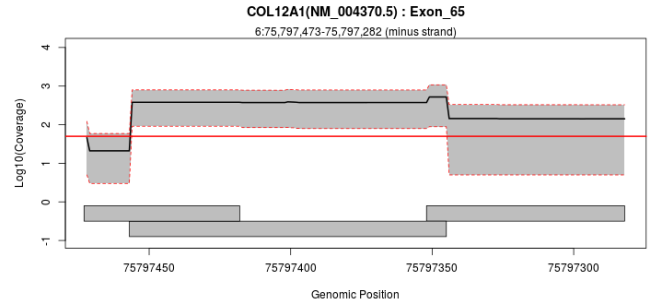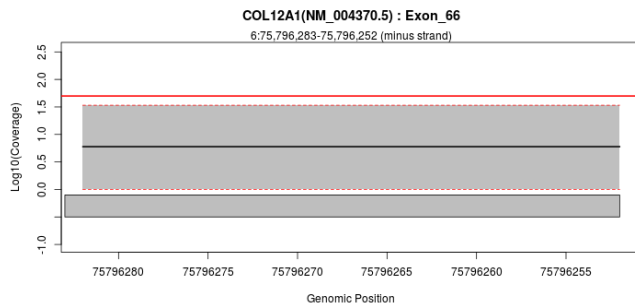

## Exon Overview: COL12A1 : NM\_080645.2

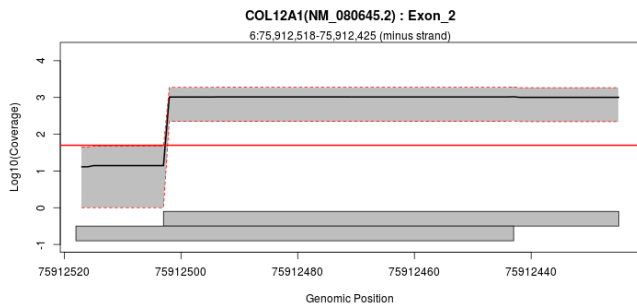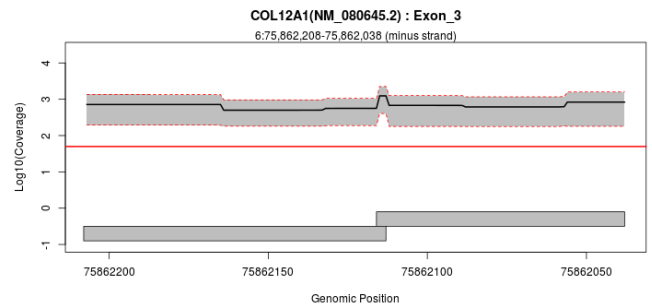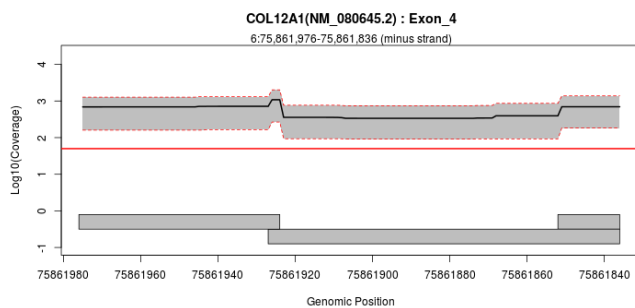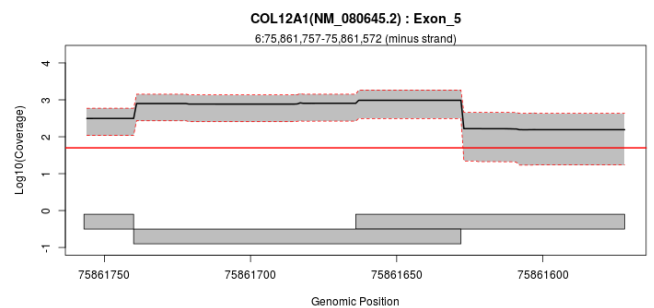

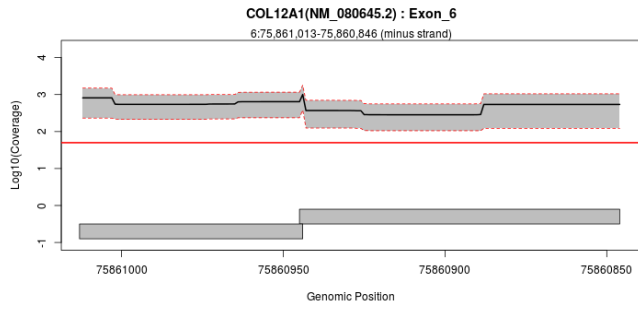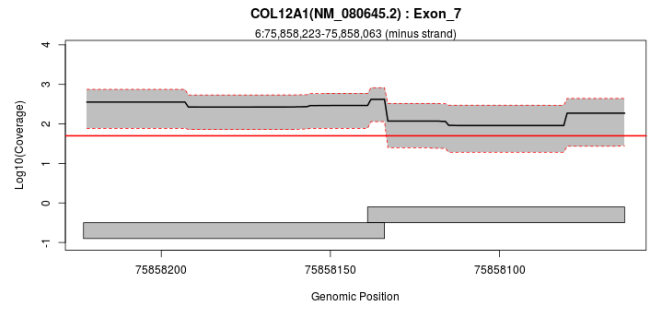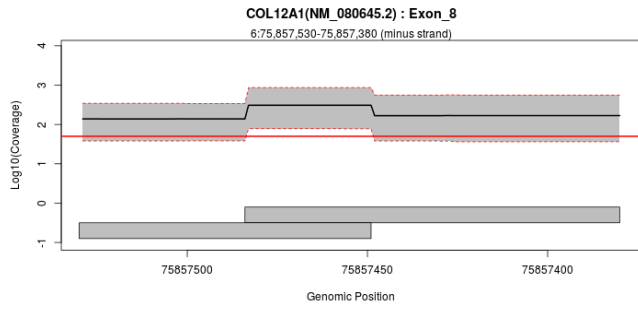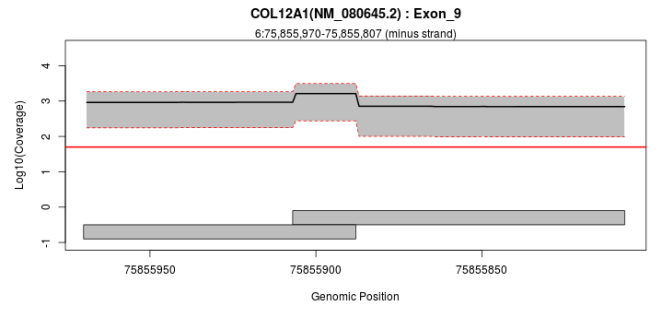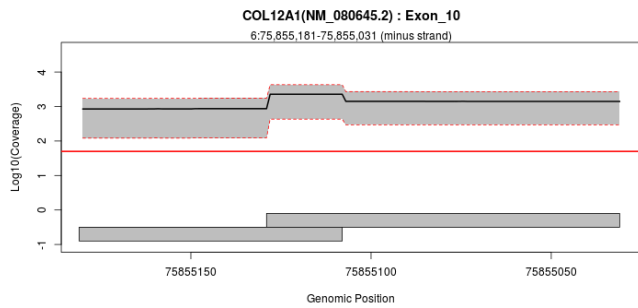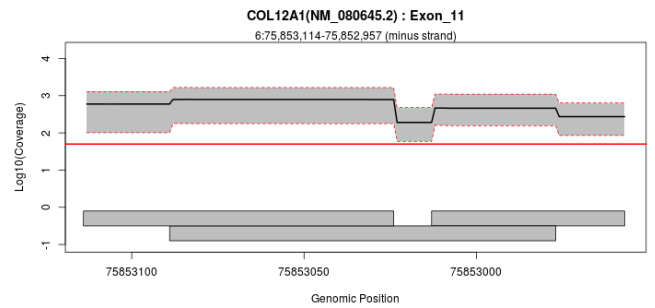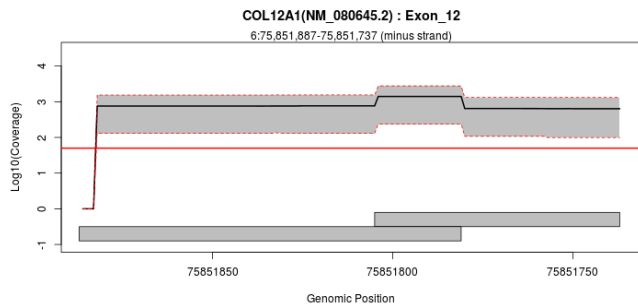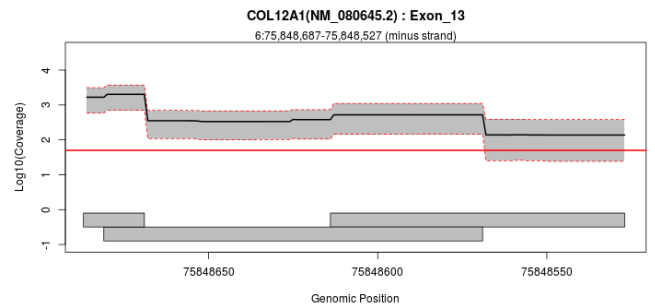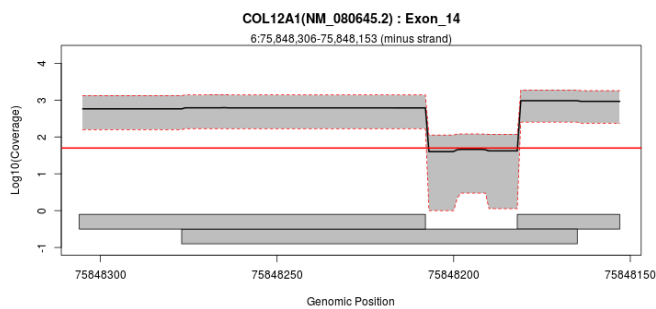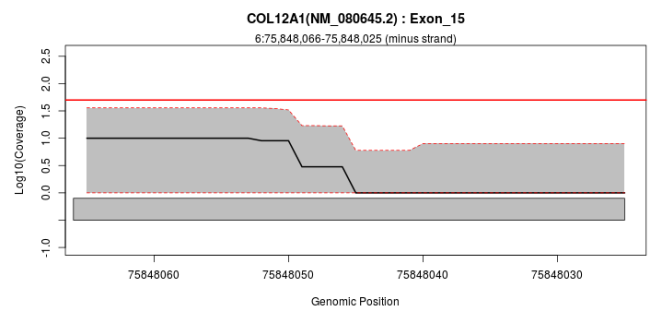



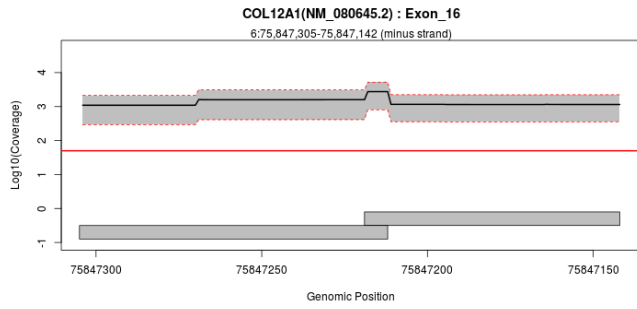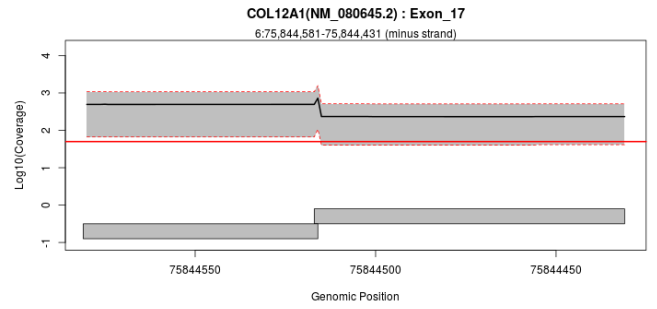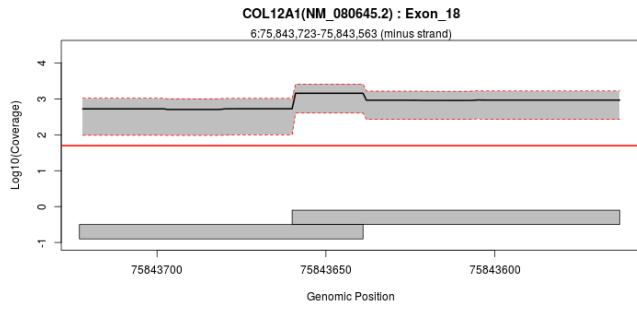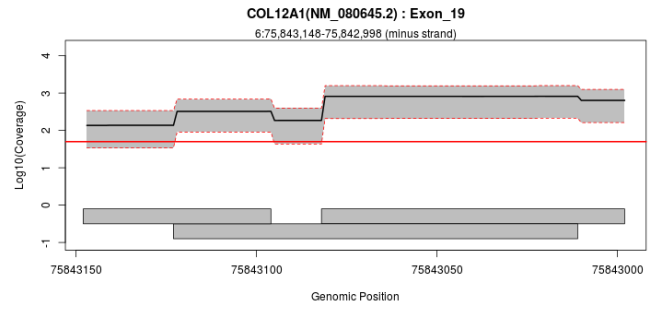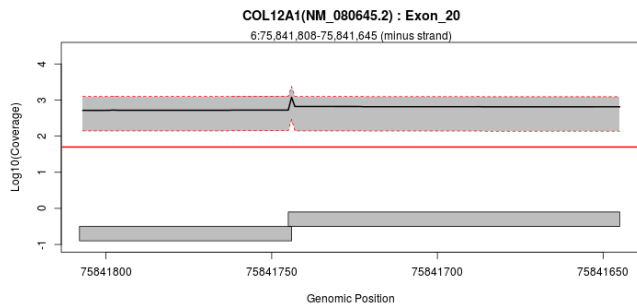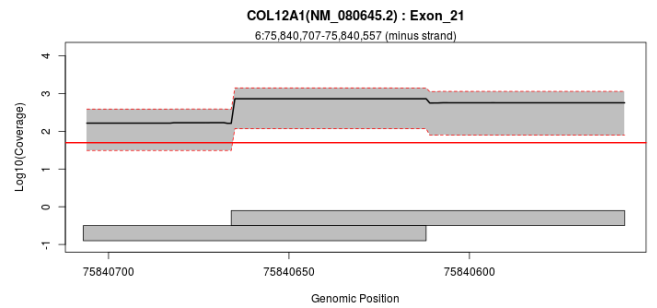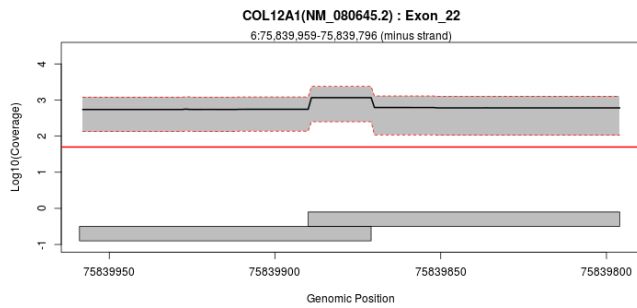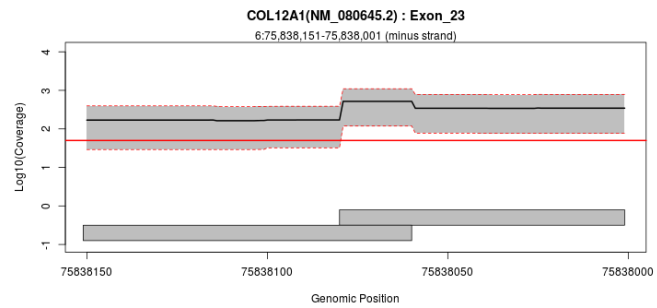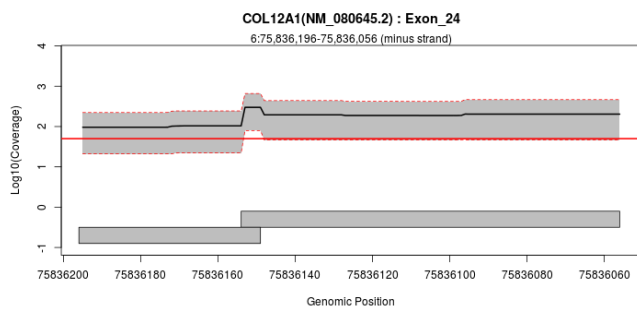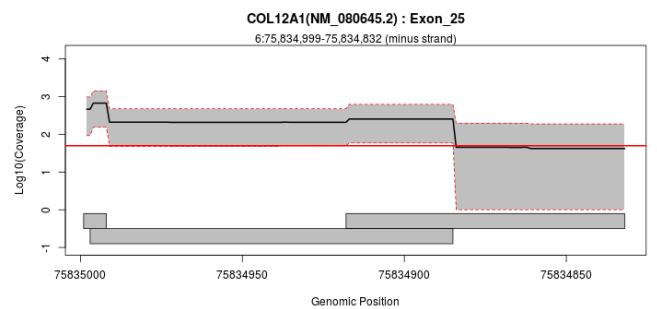

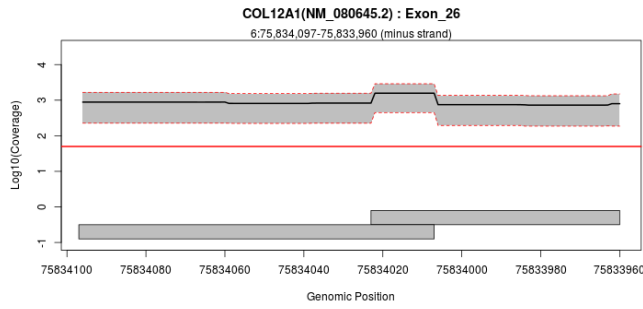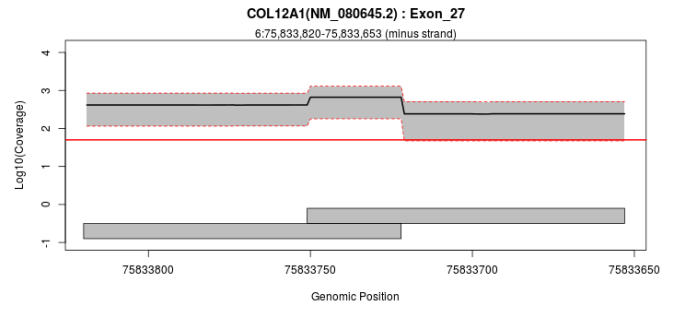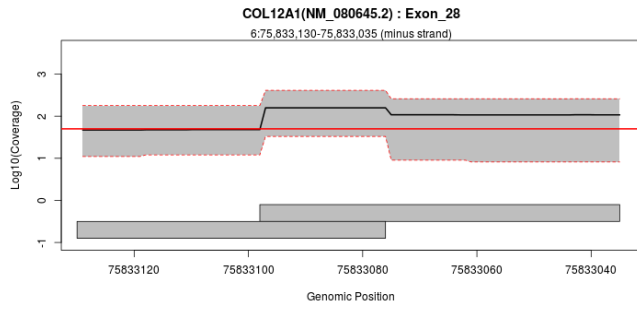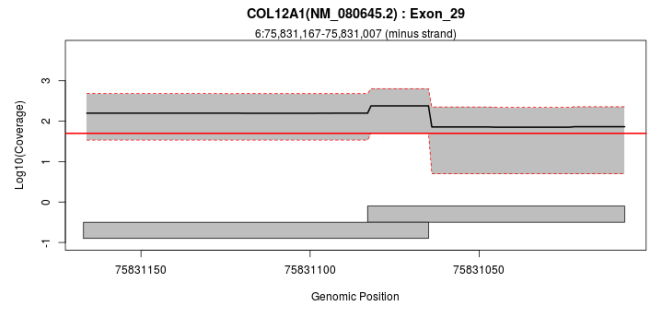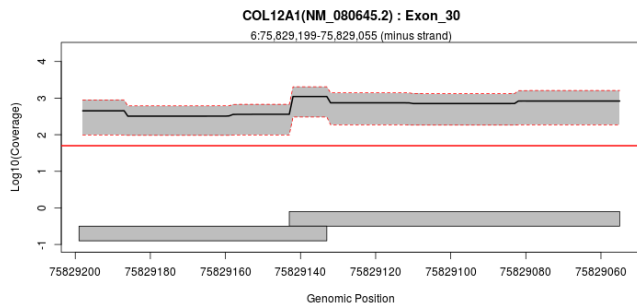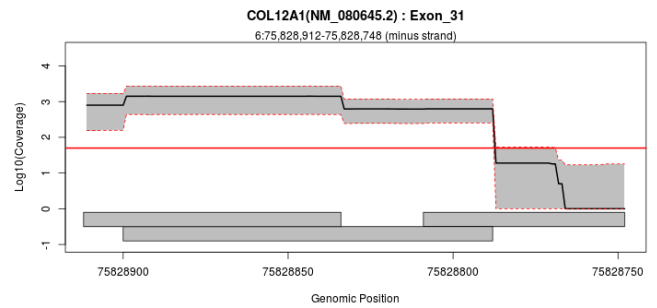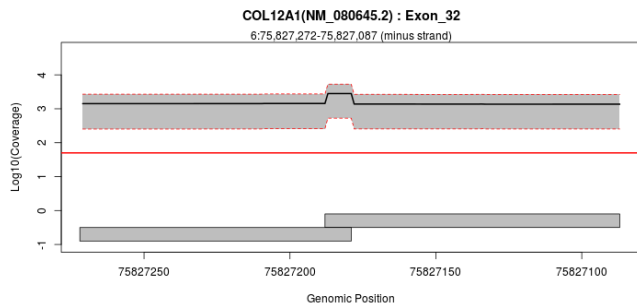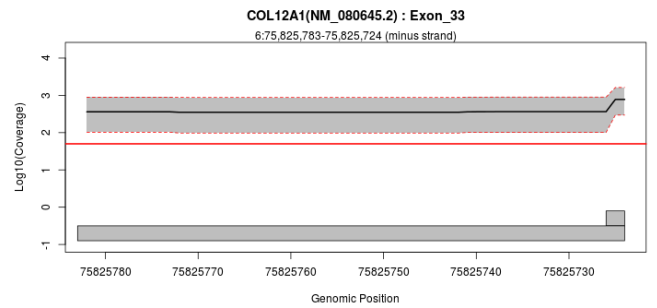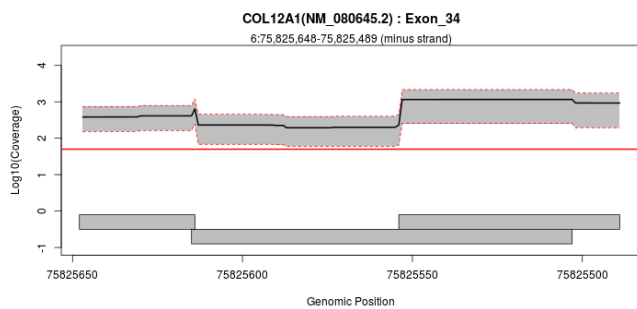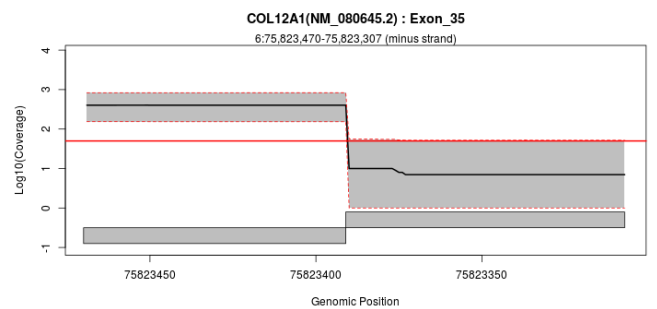

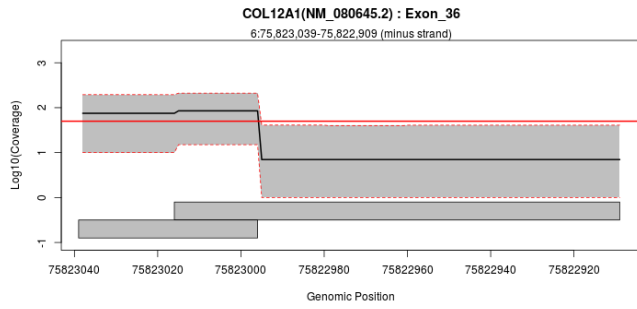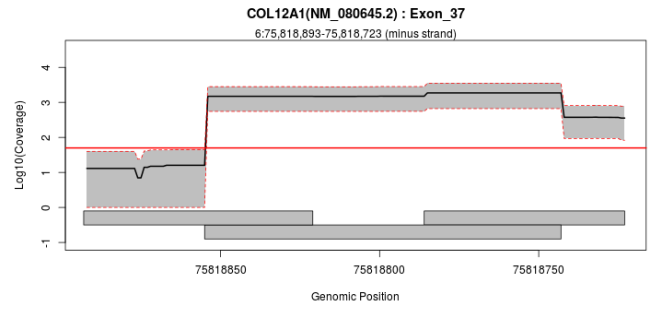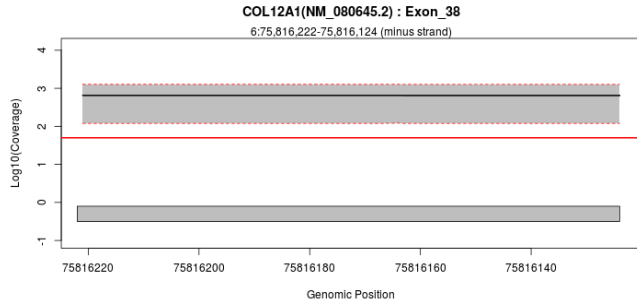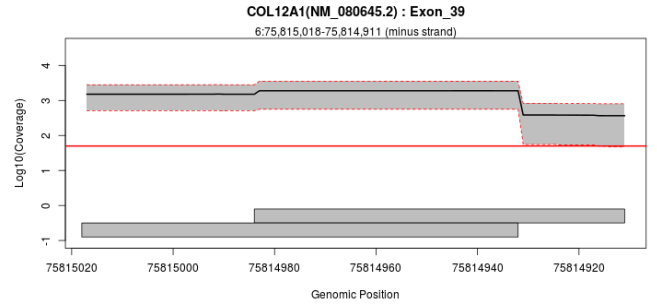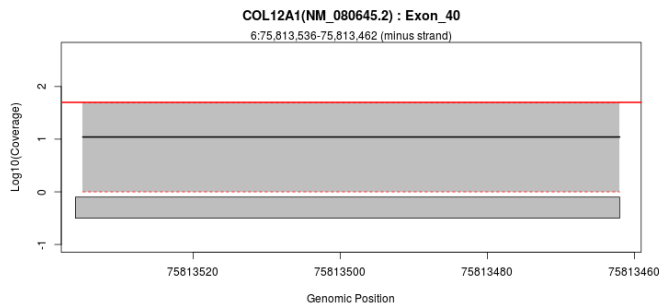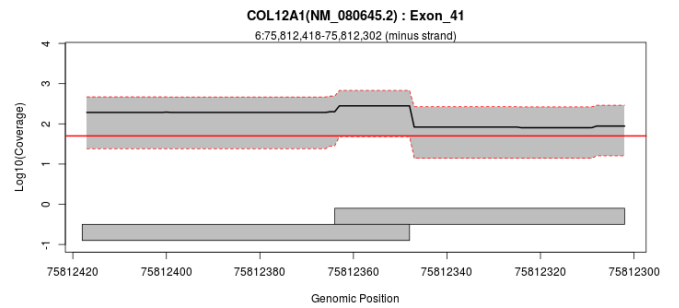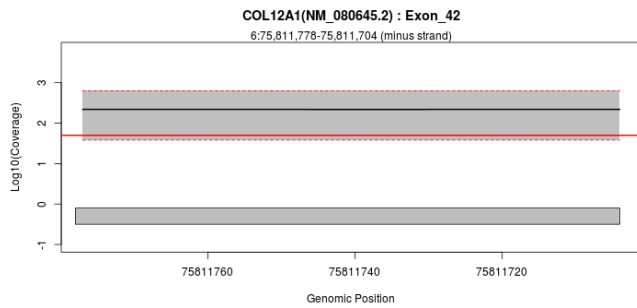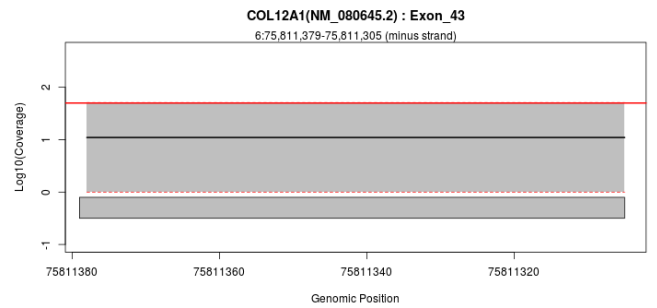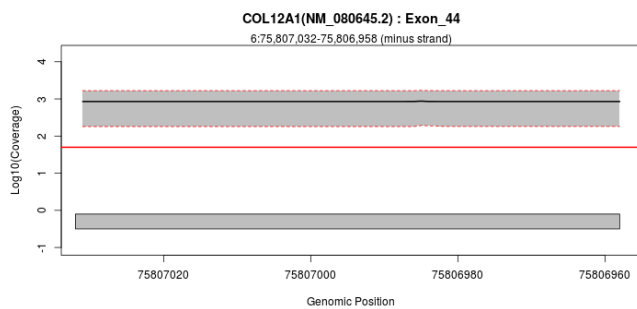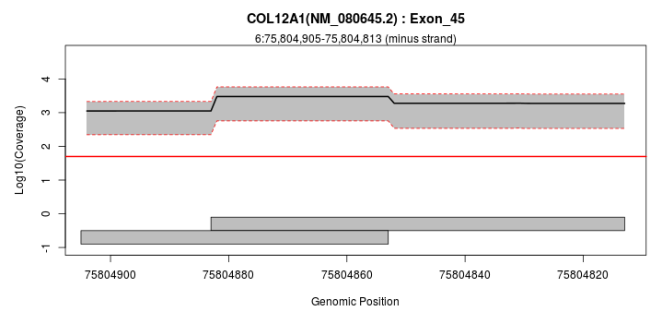

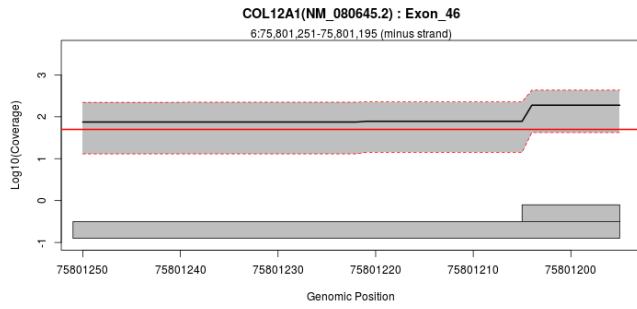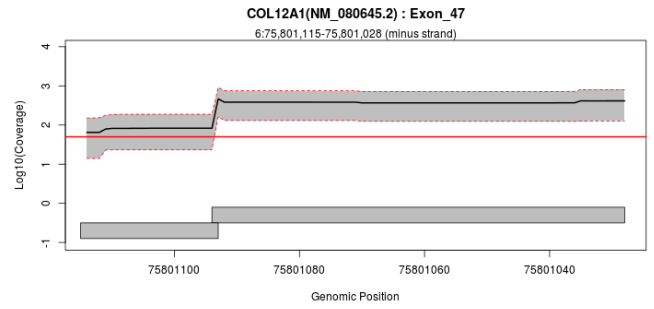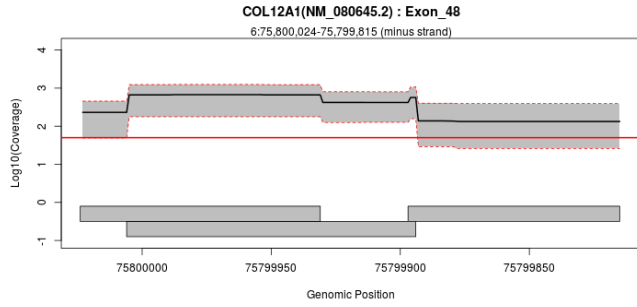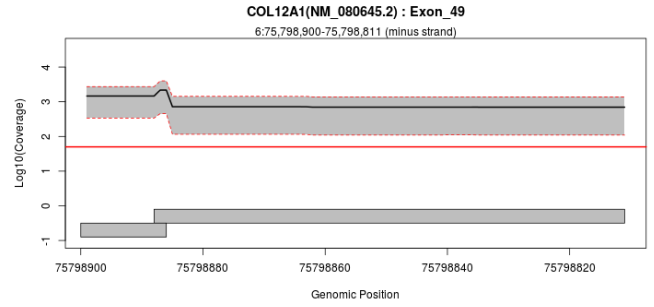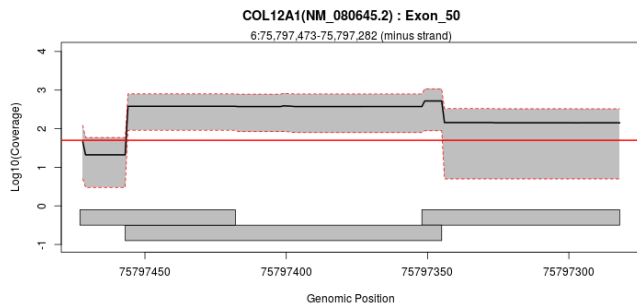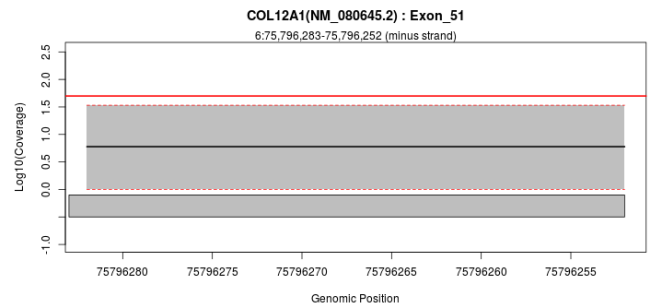

## Exon Overview: COL2A1 : NM\_001844.4

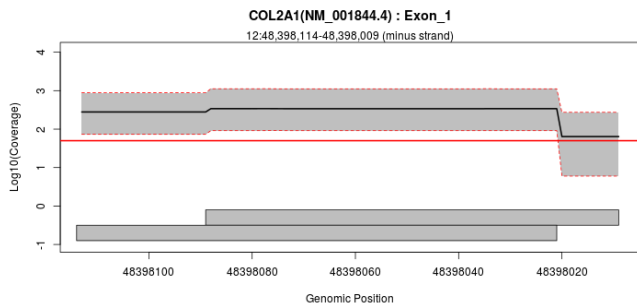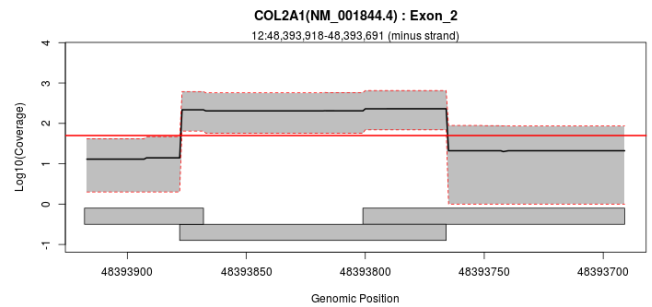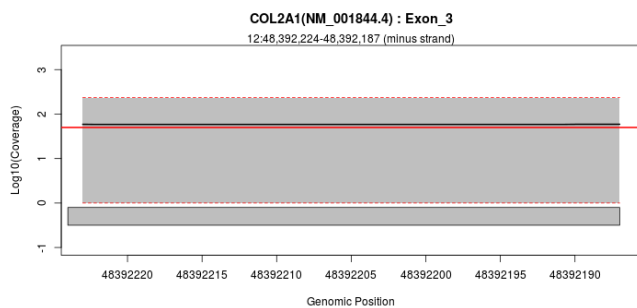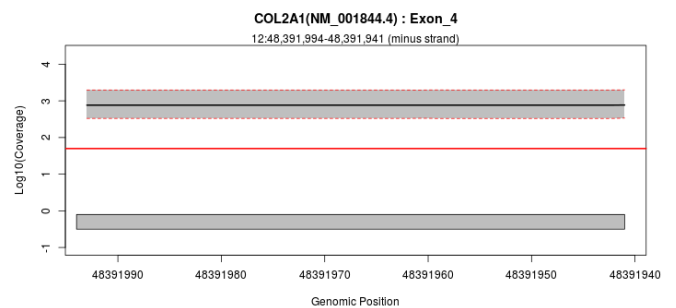

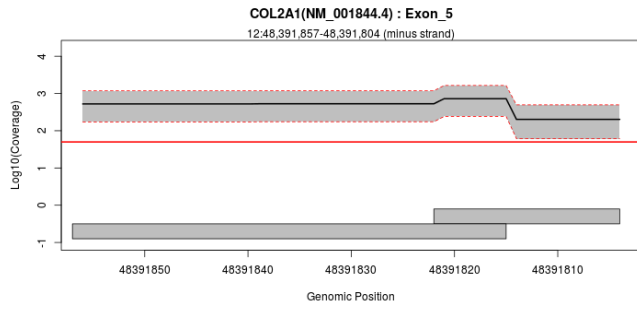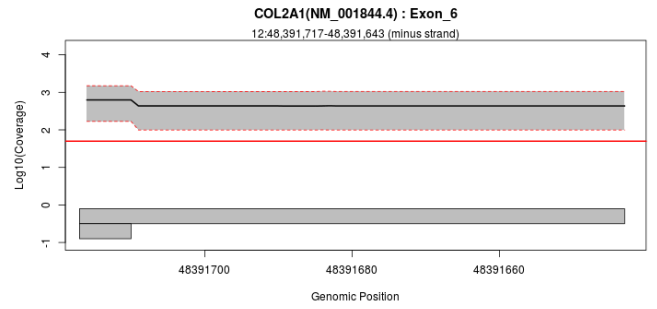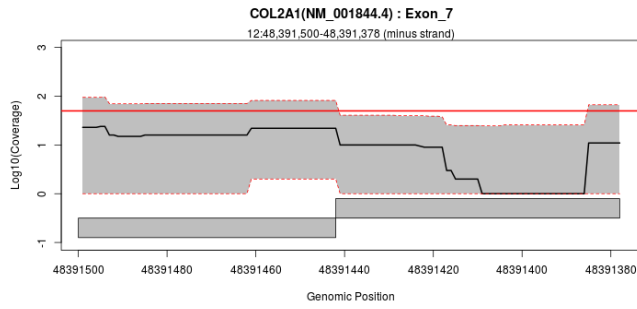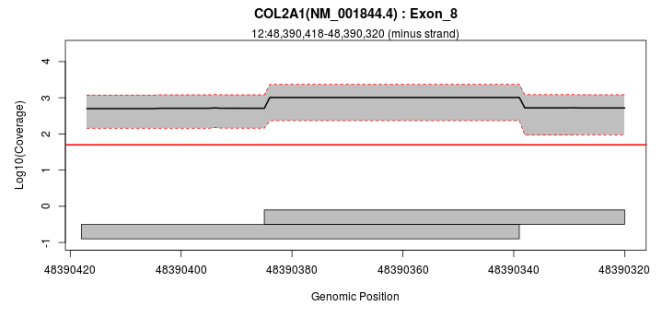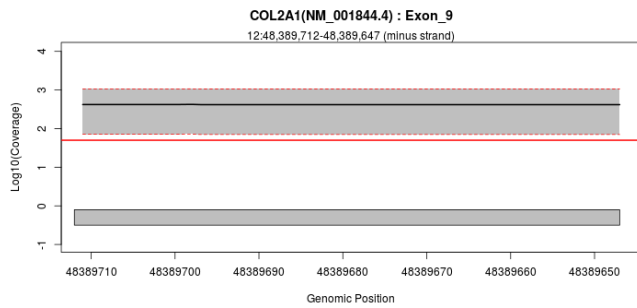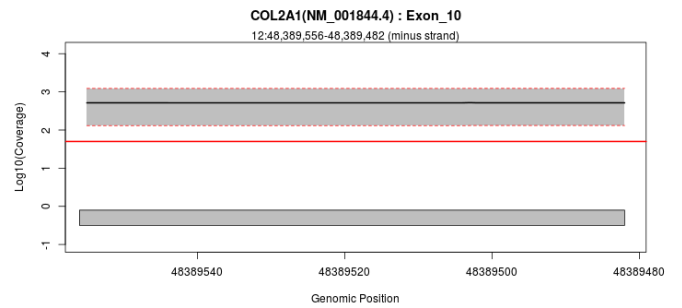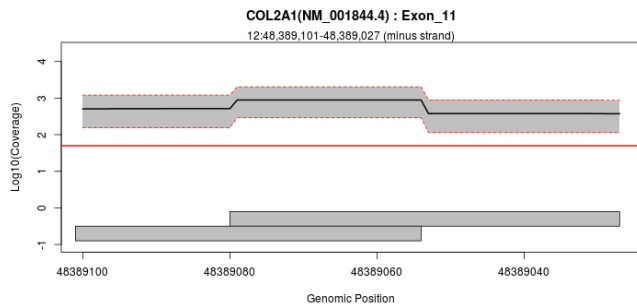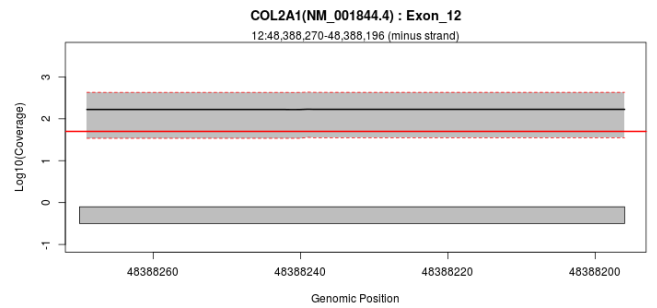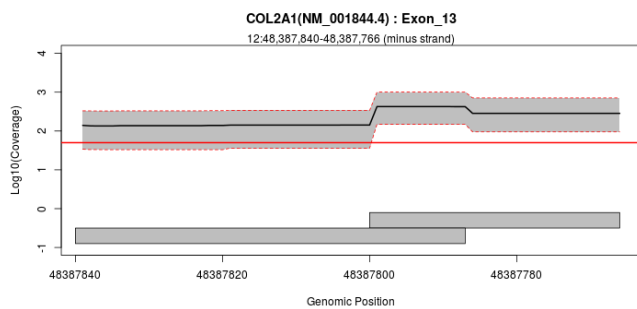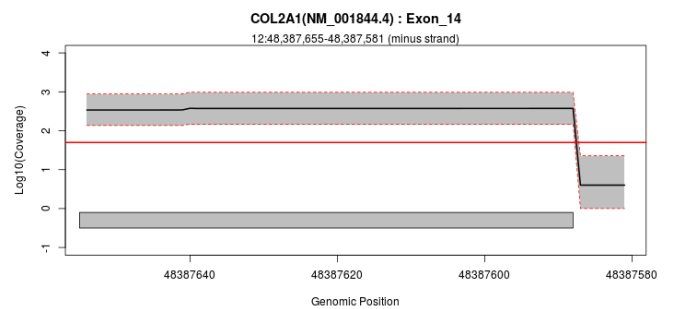

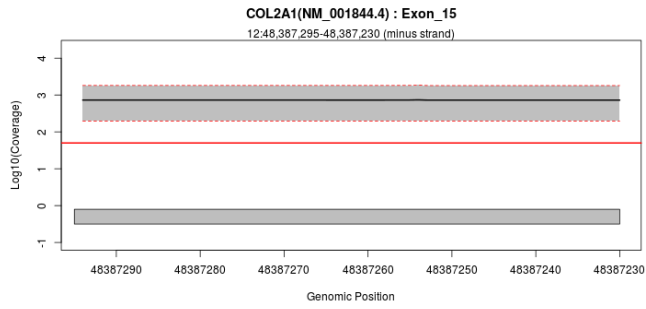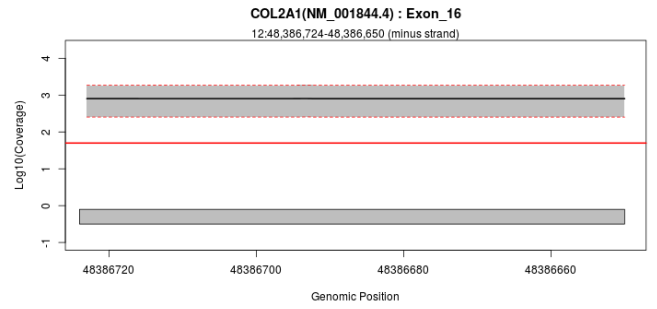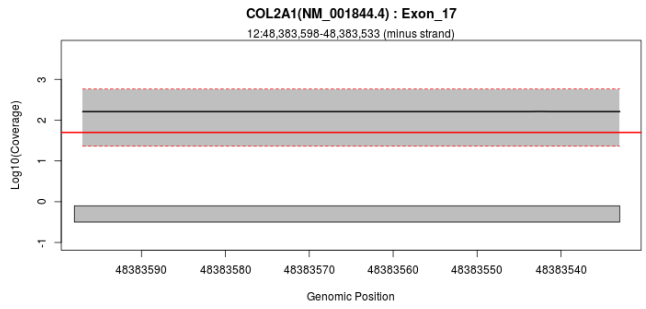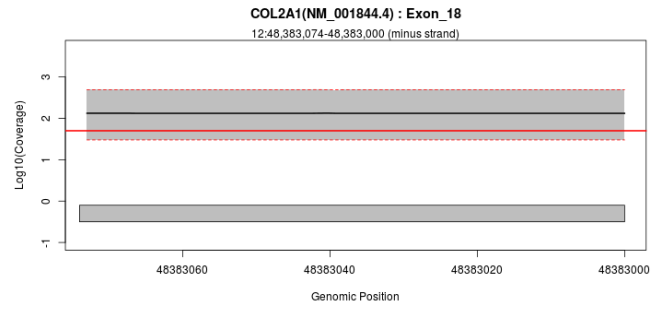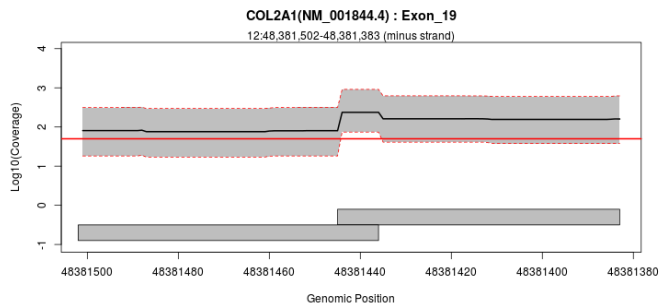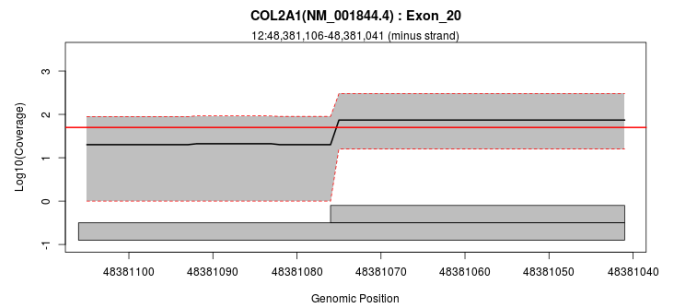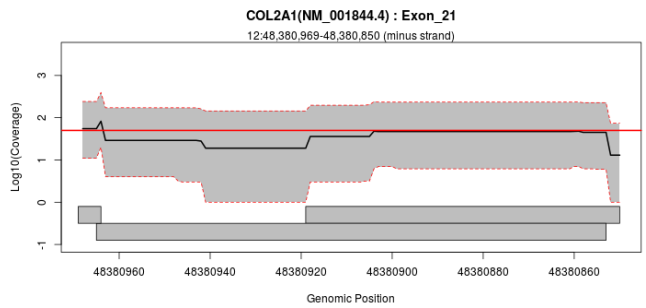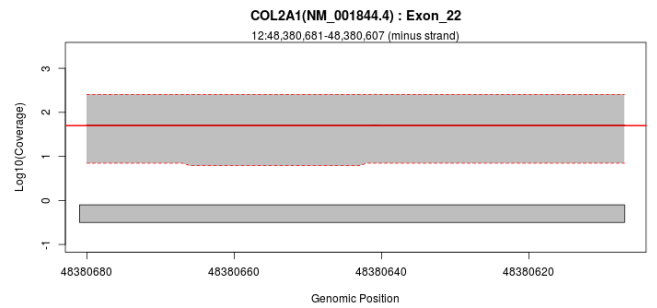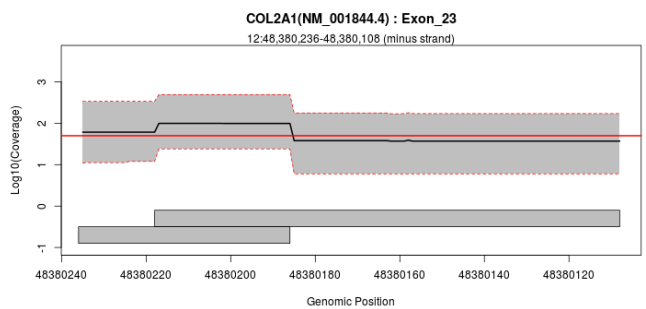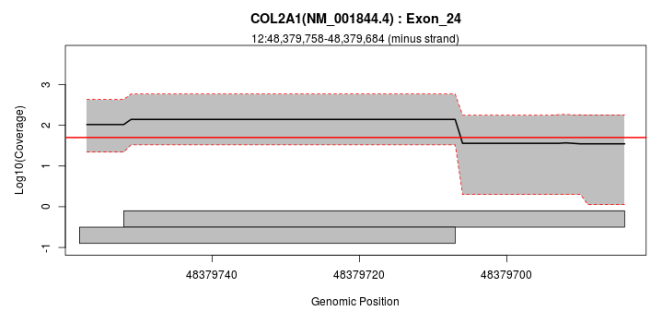

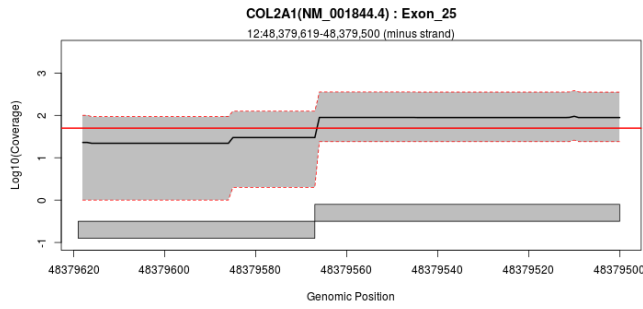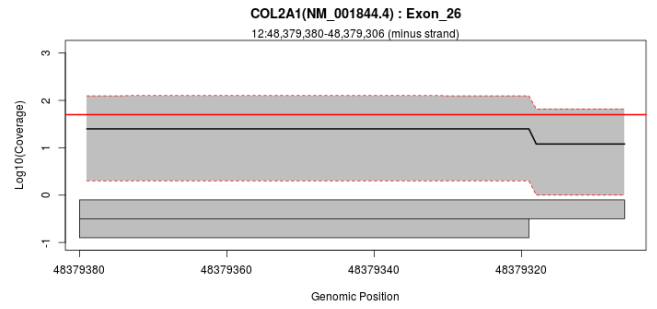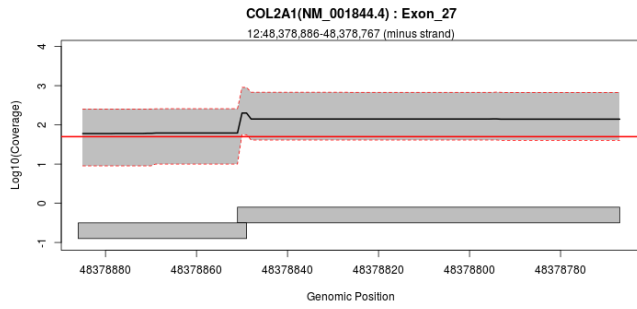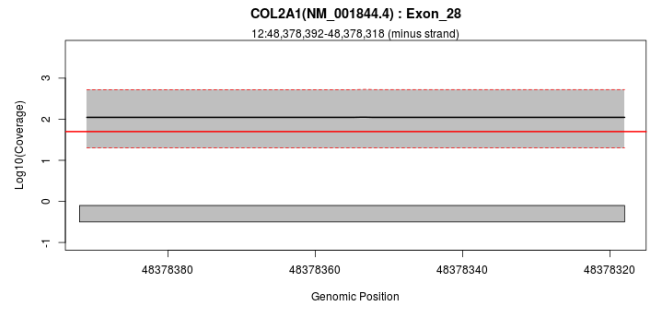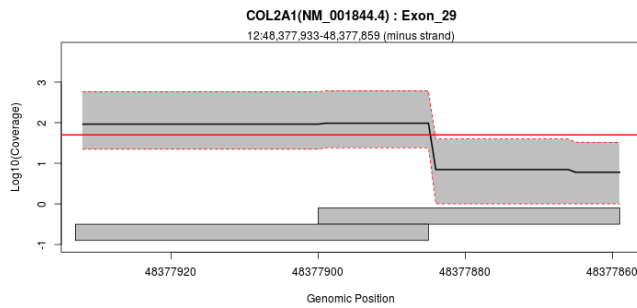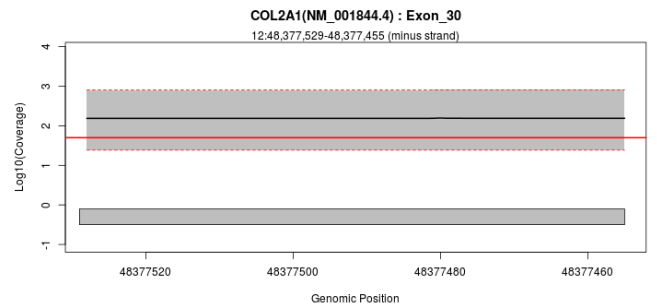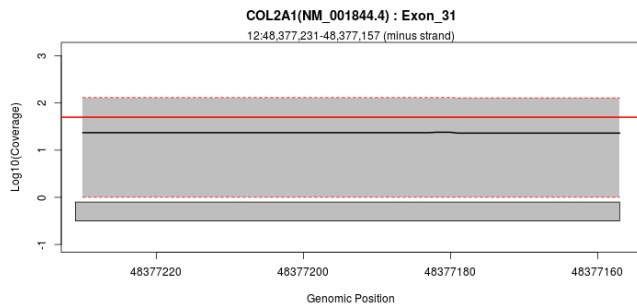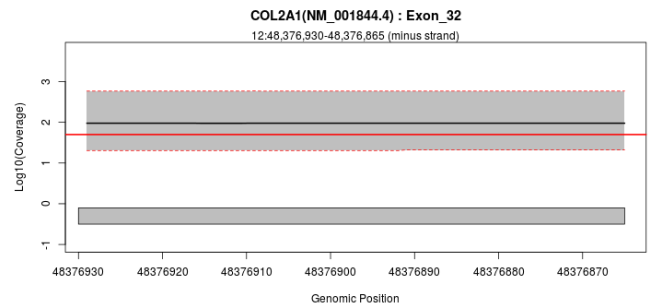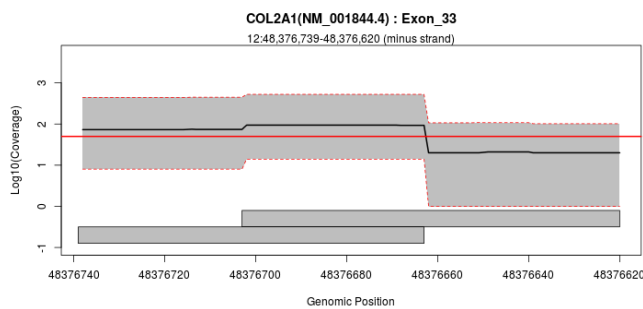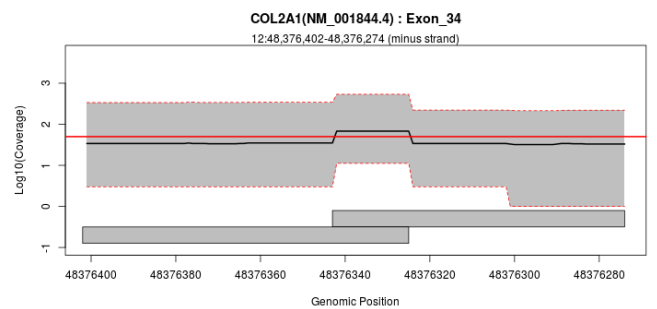

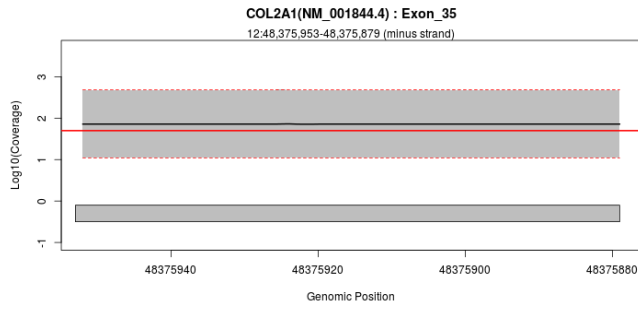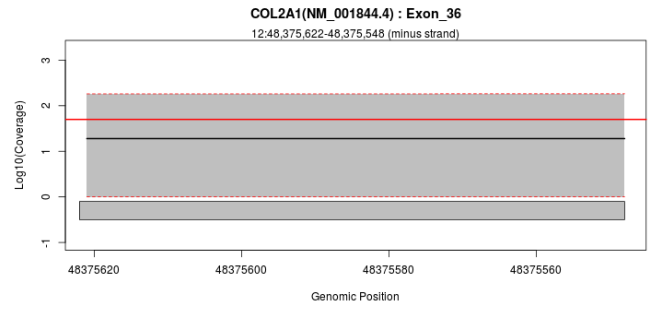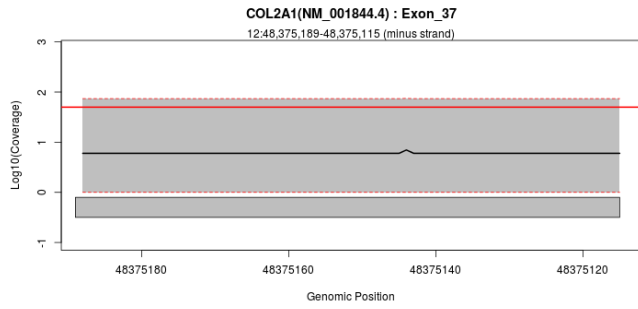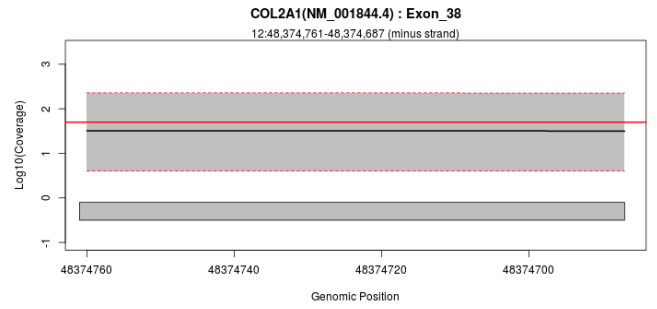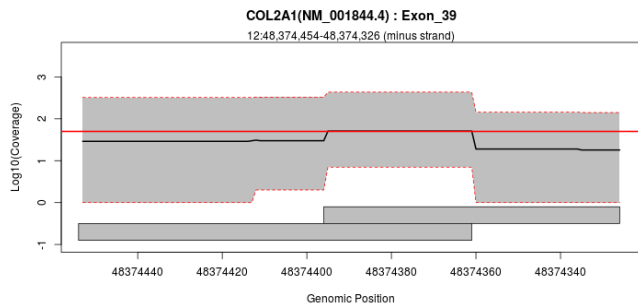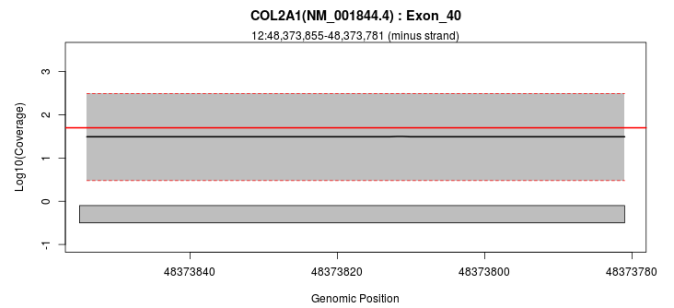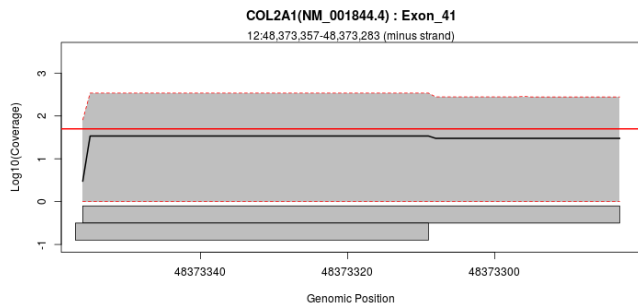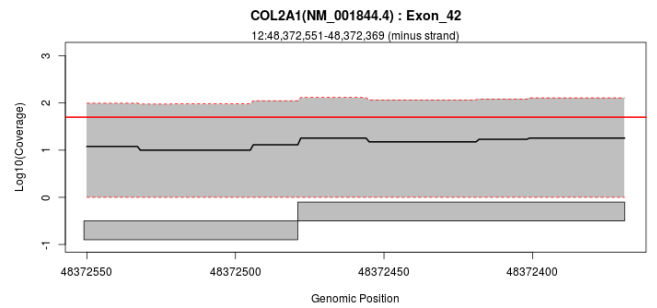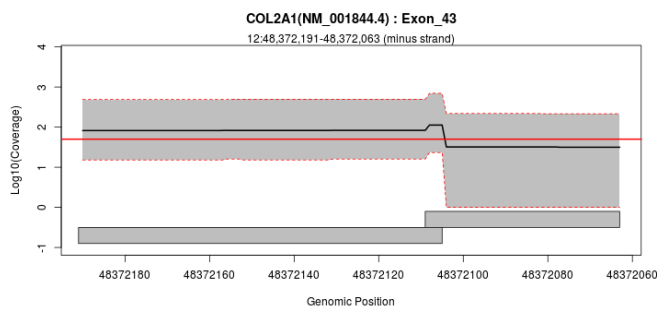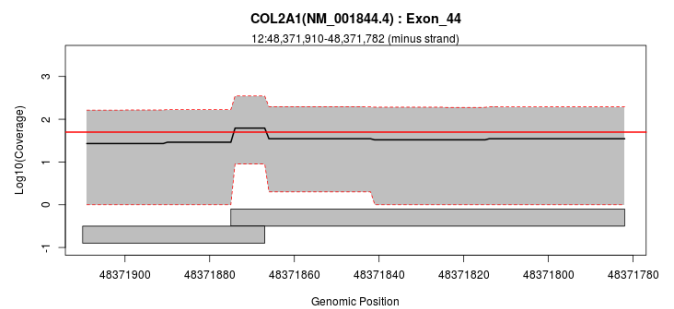



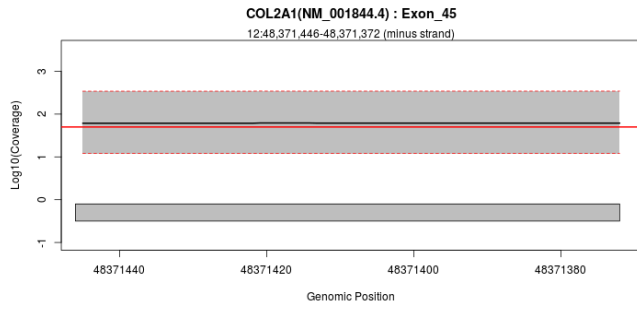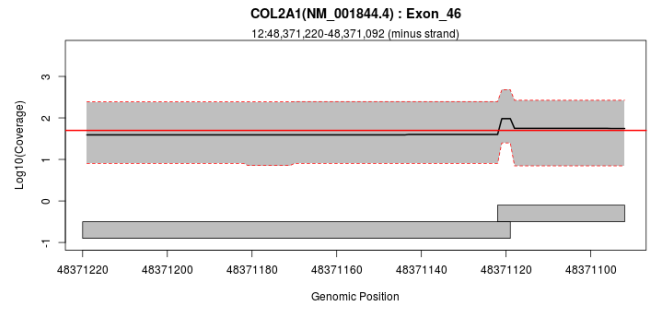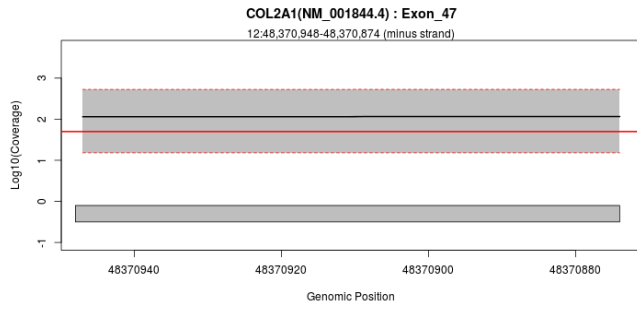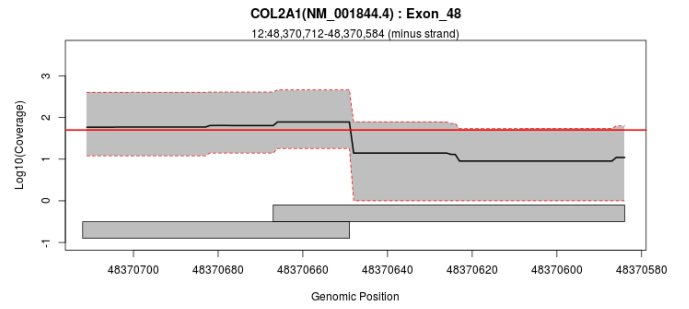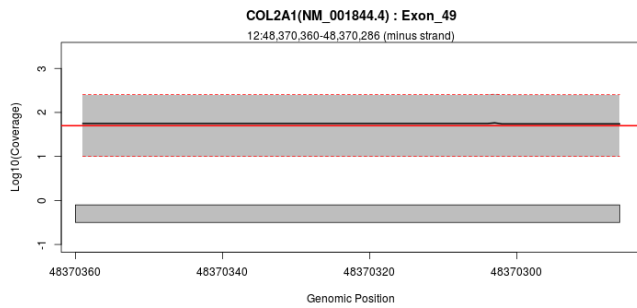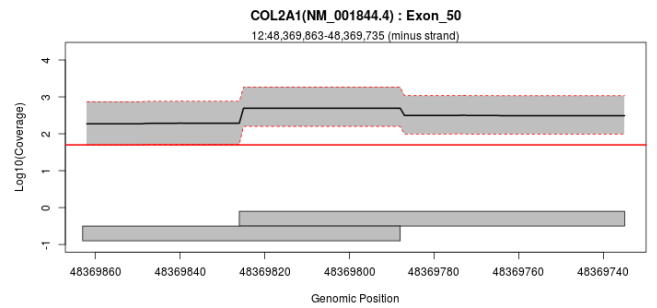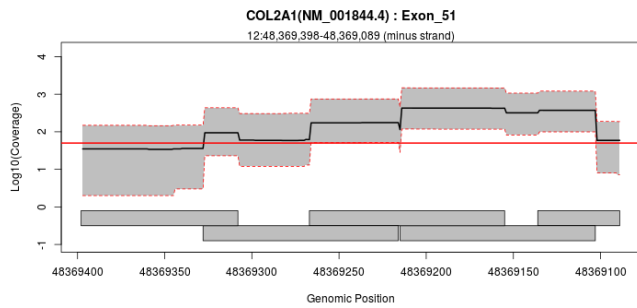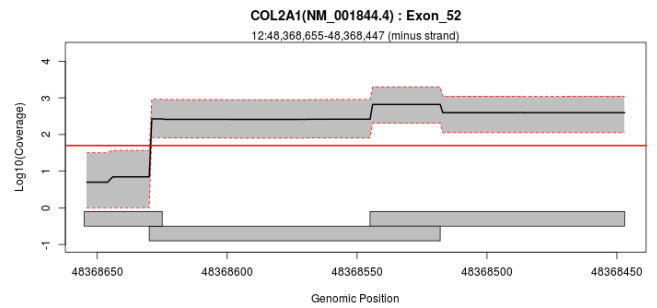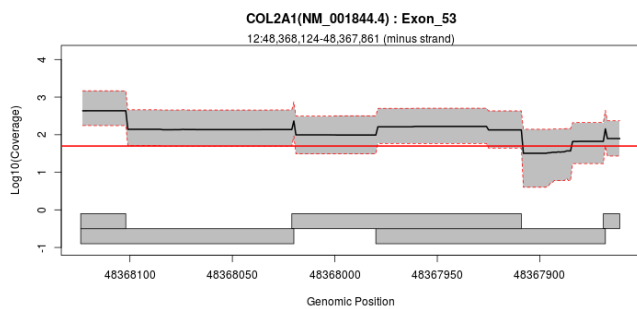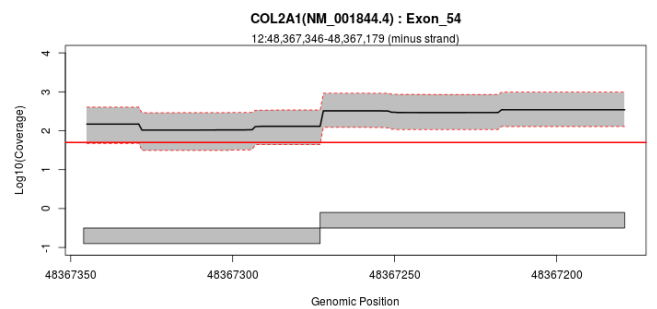

# Exon Overview: COL2A1 : NM\_033150.2

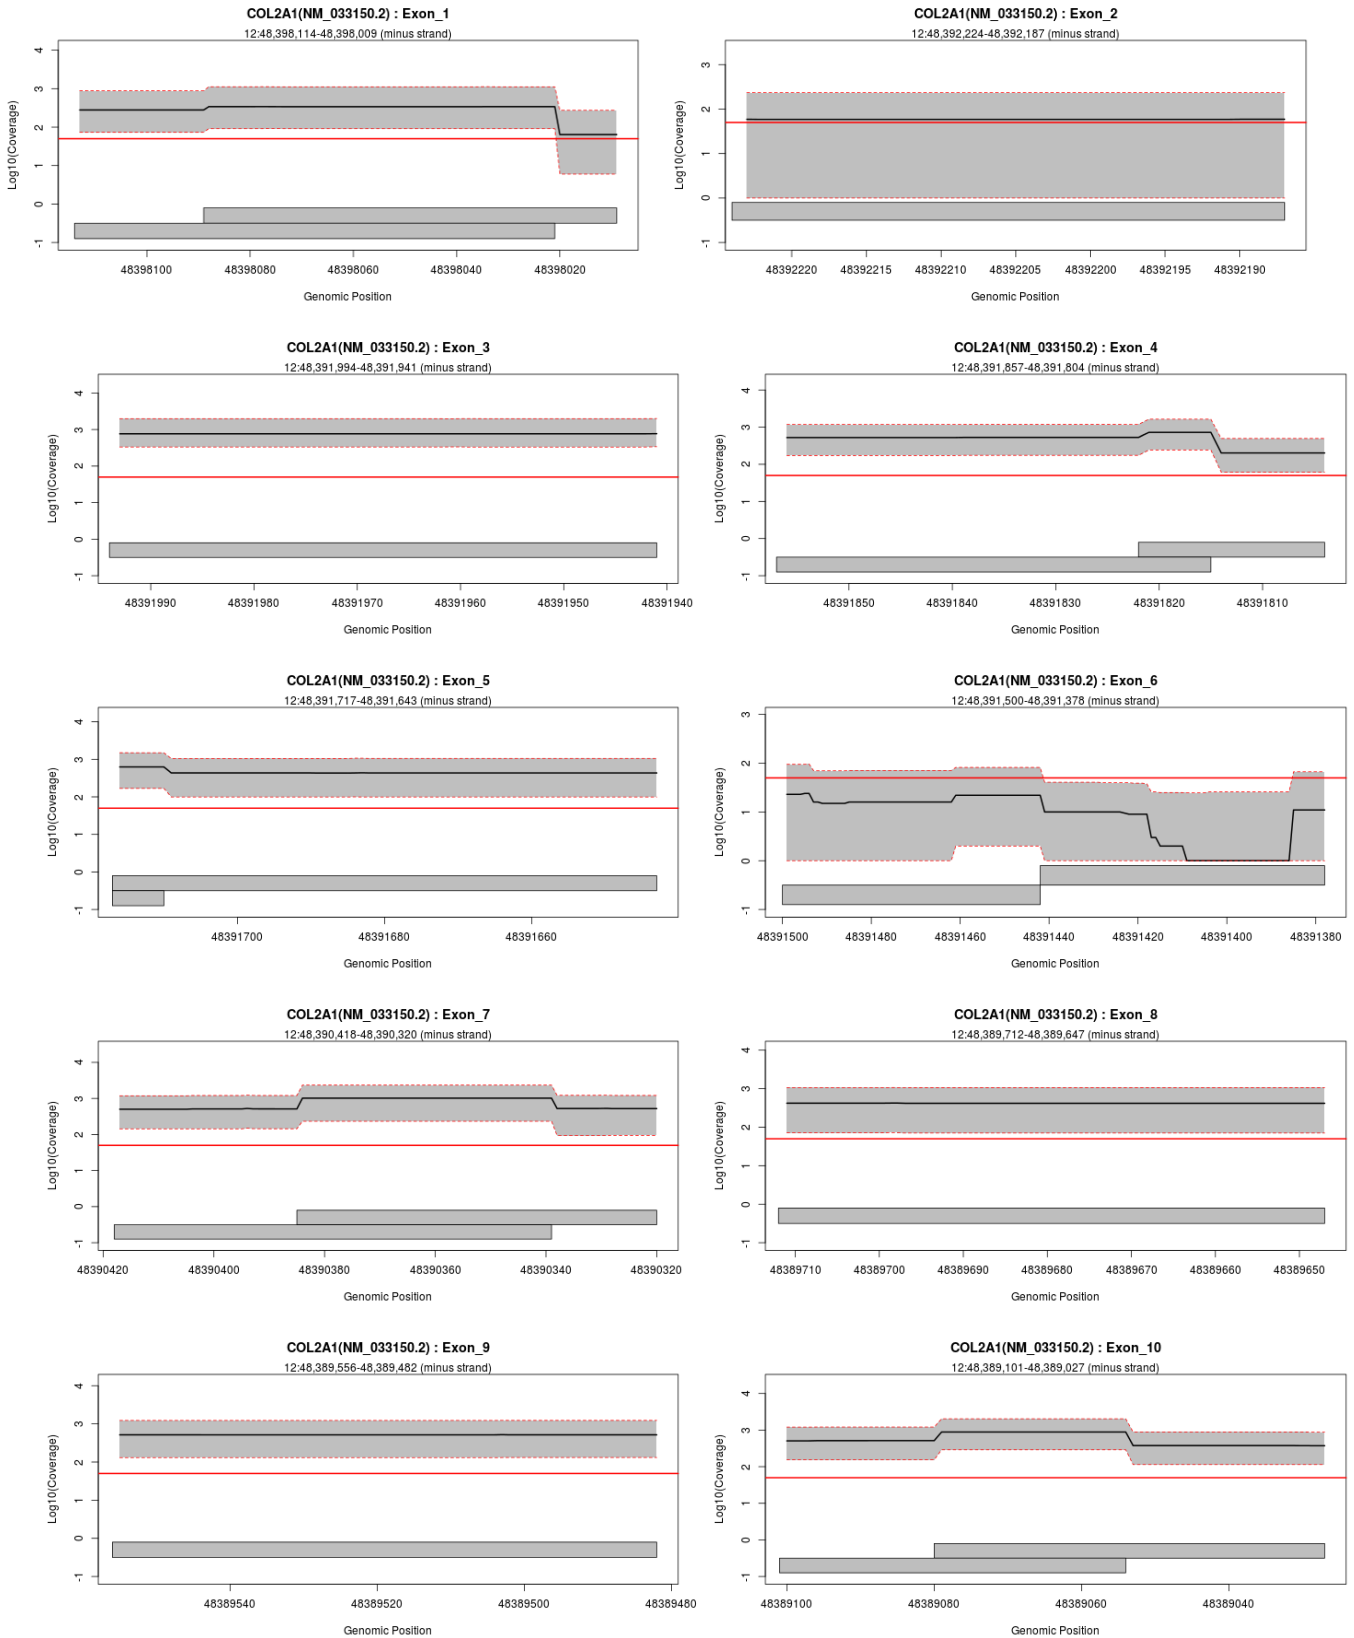

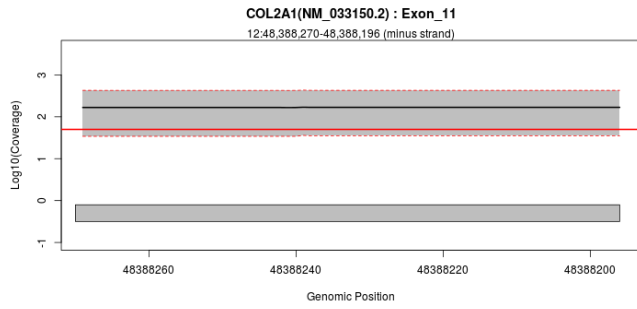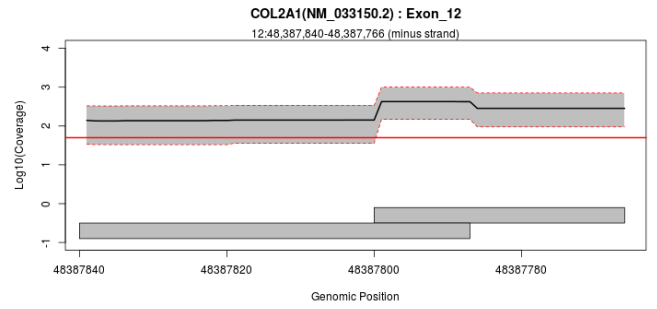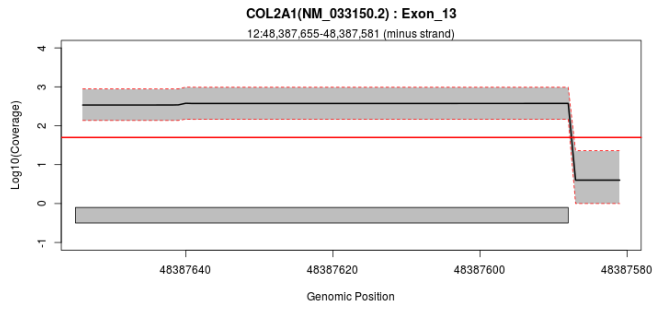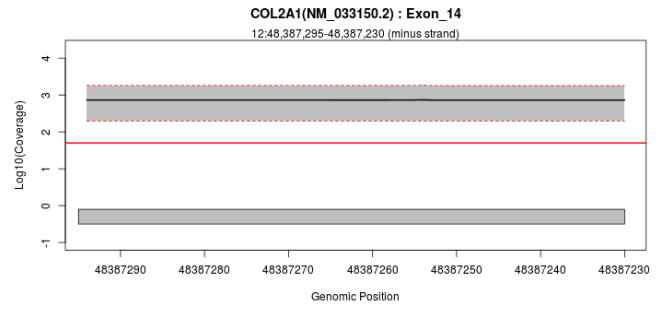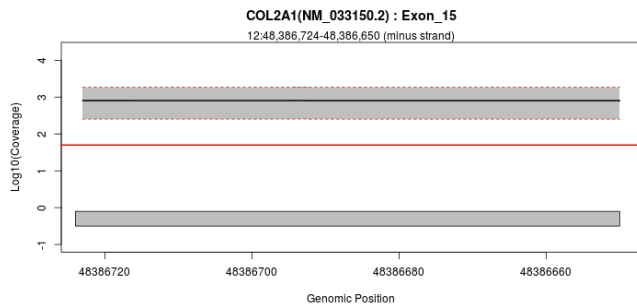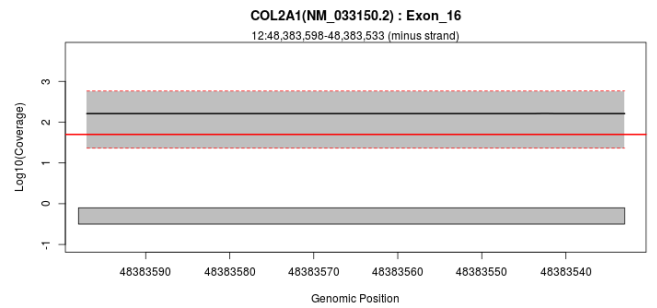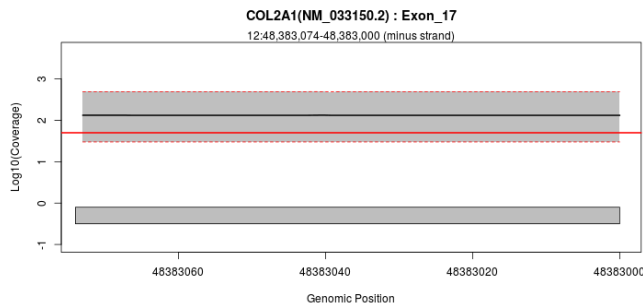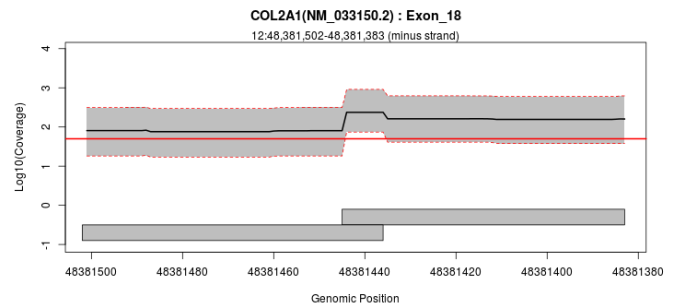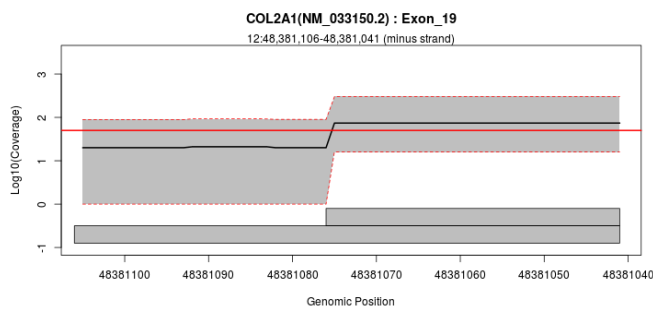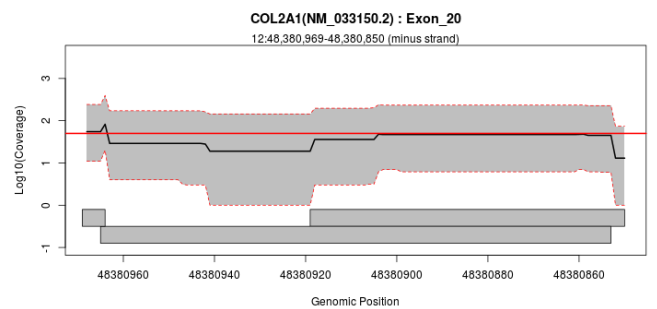

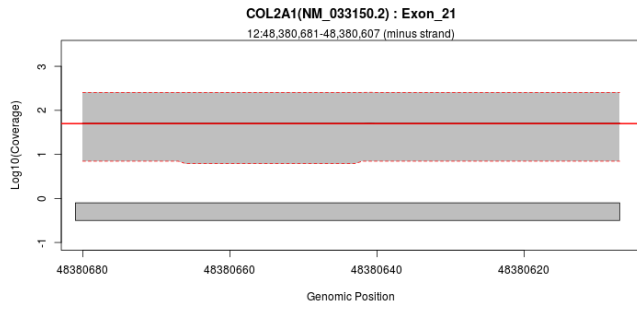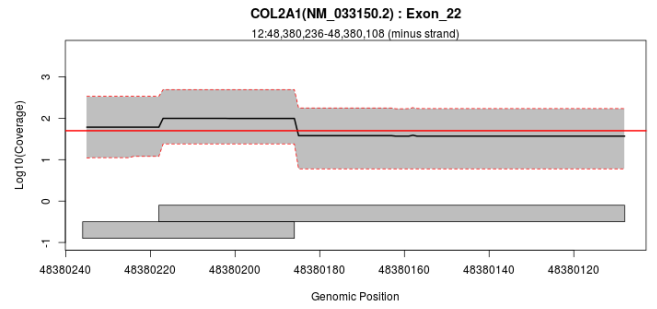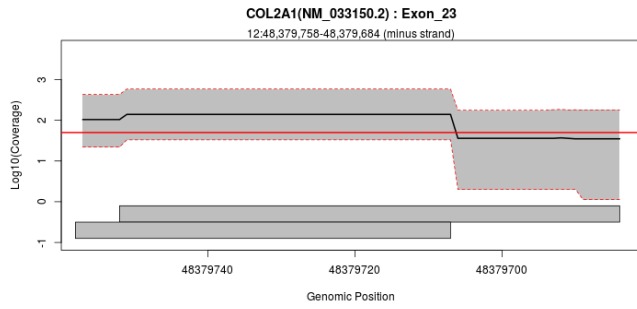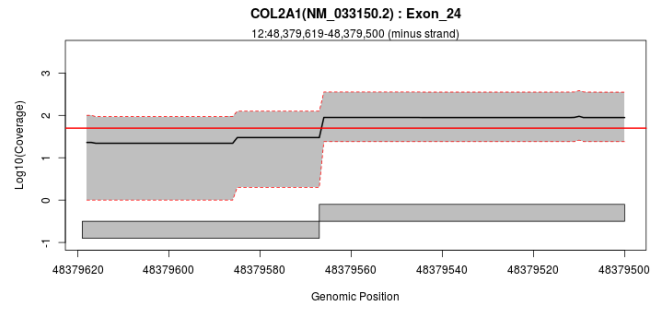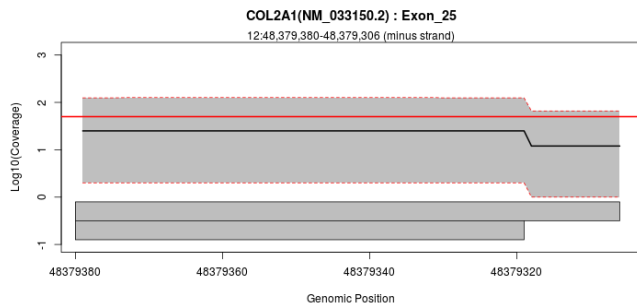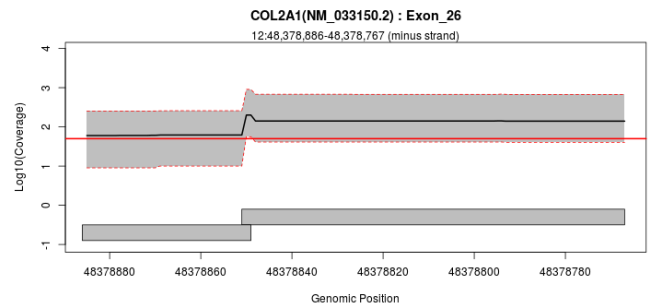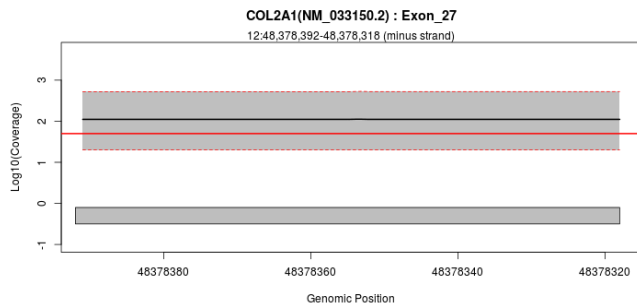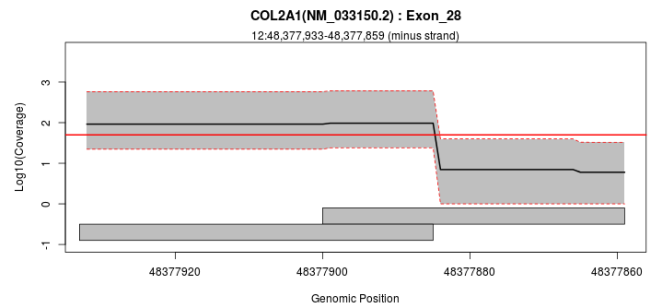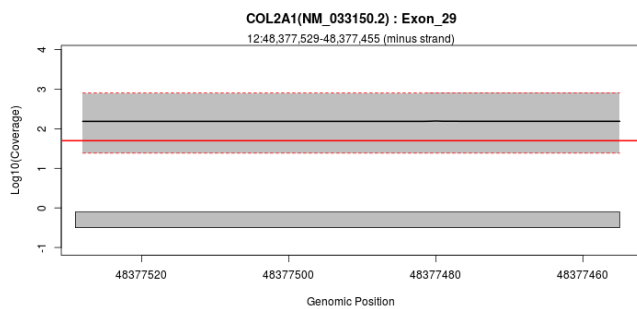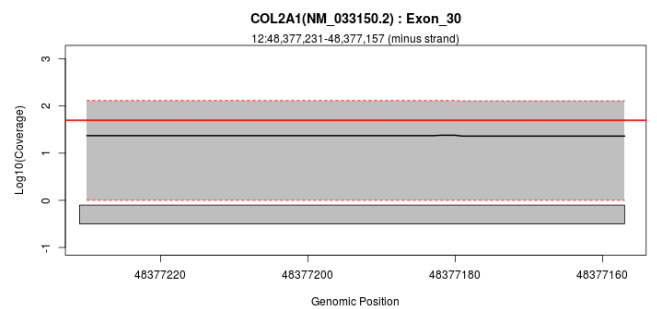

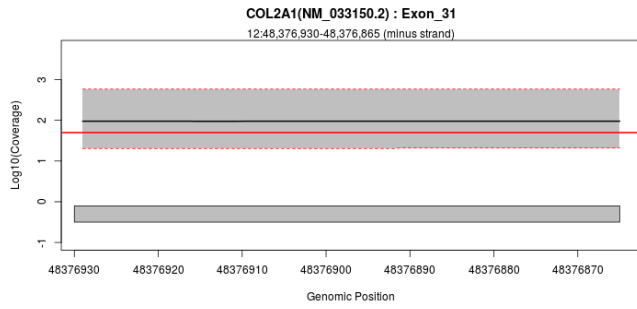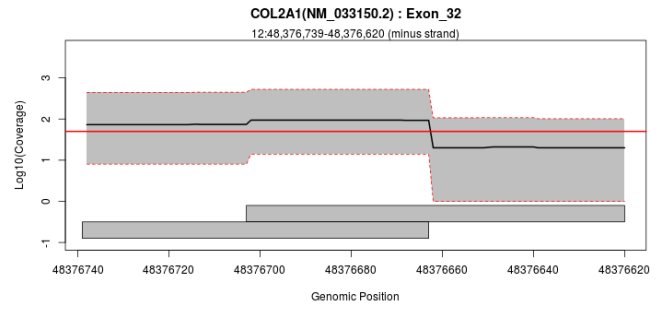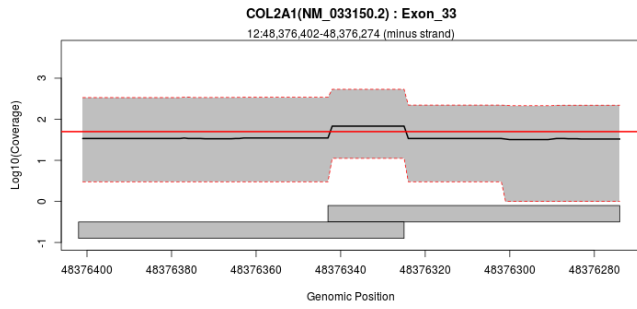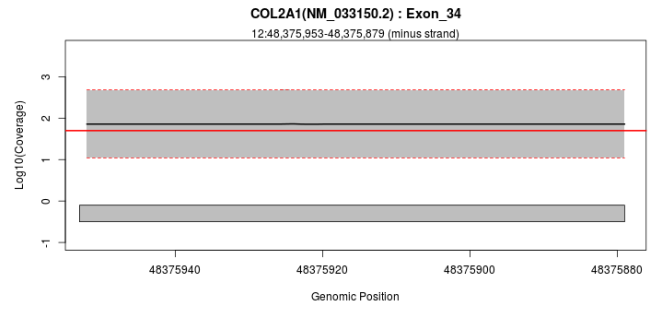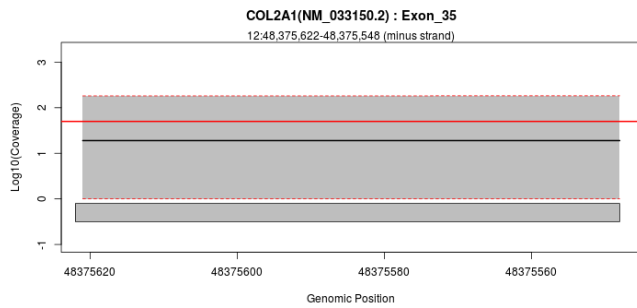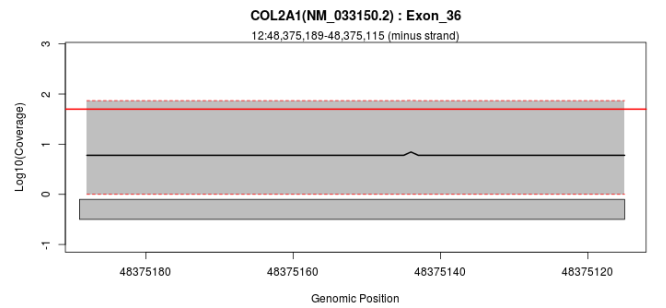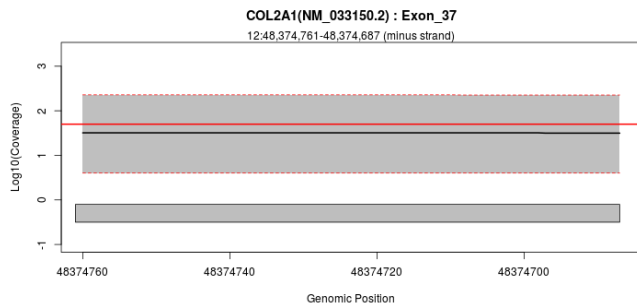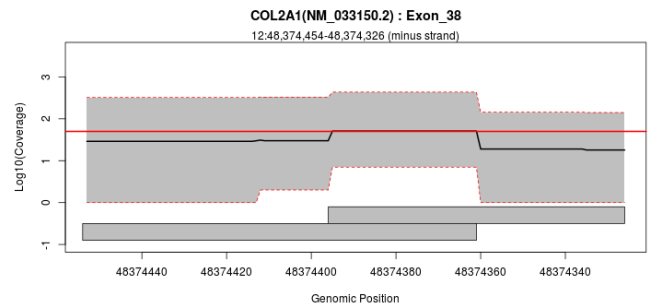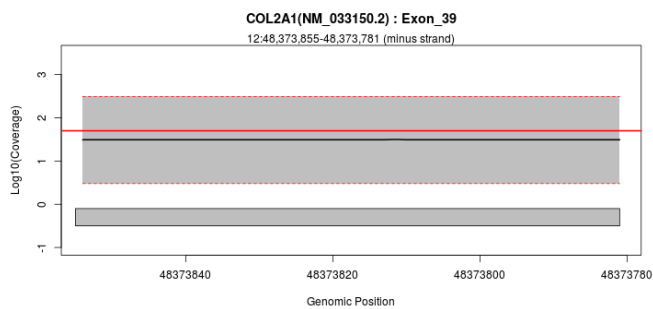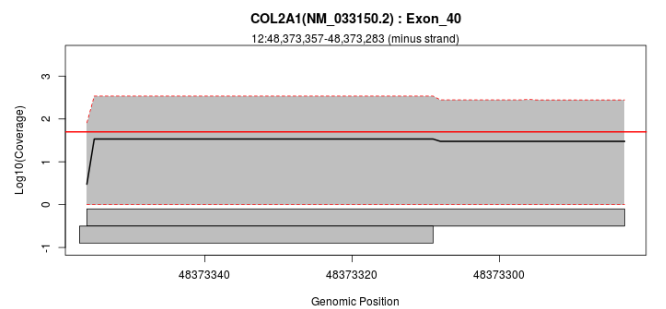

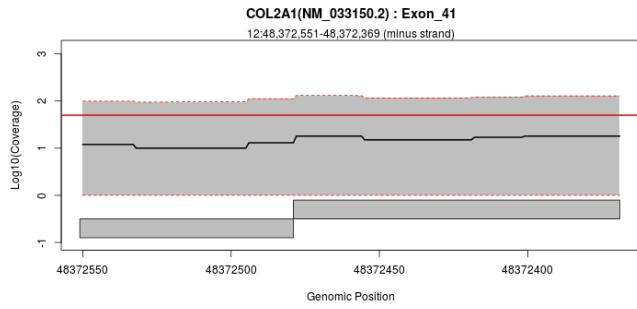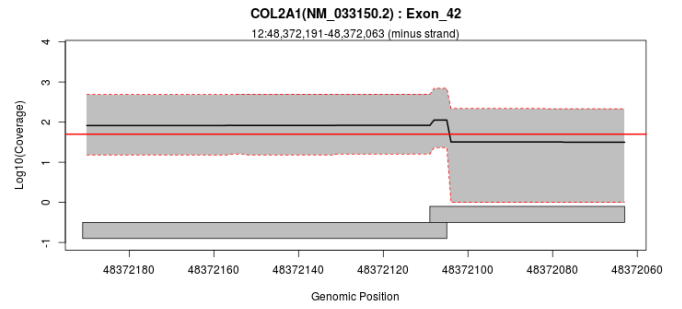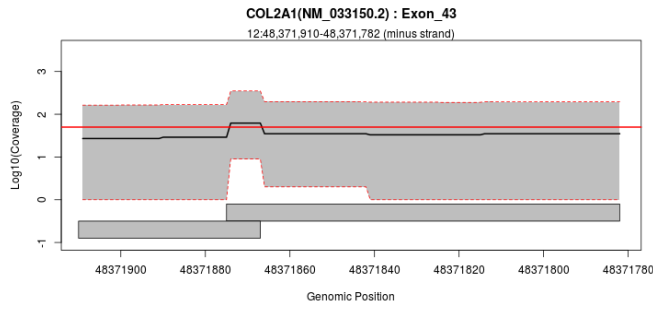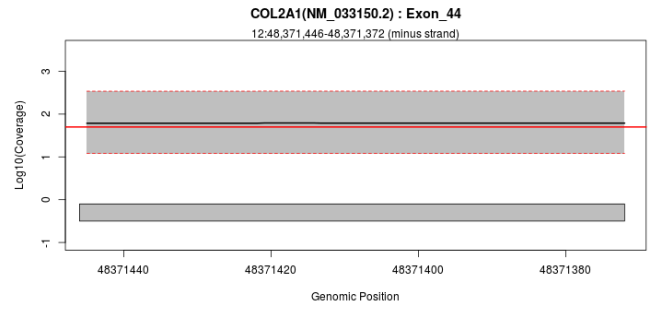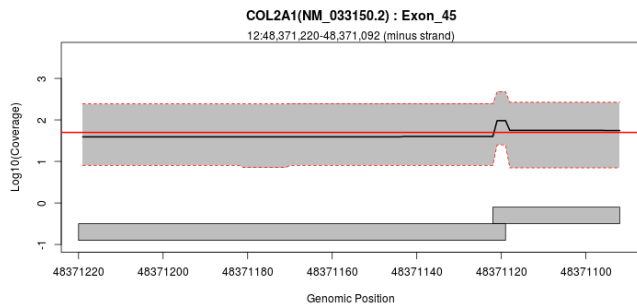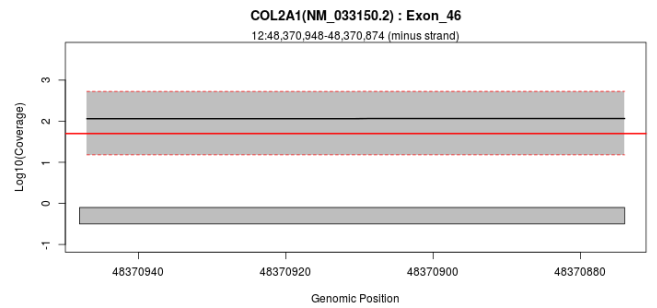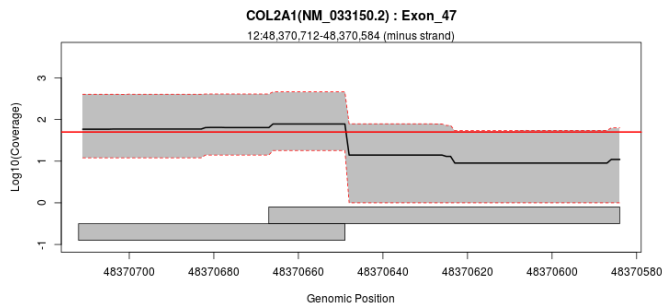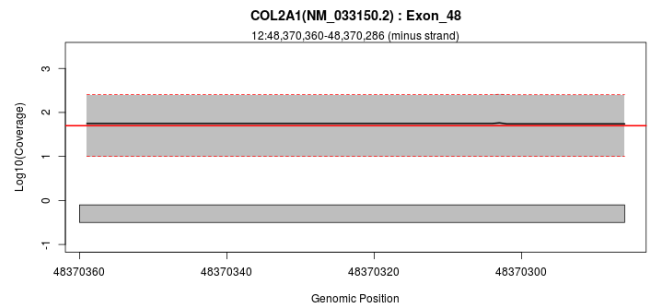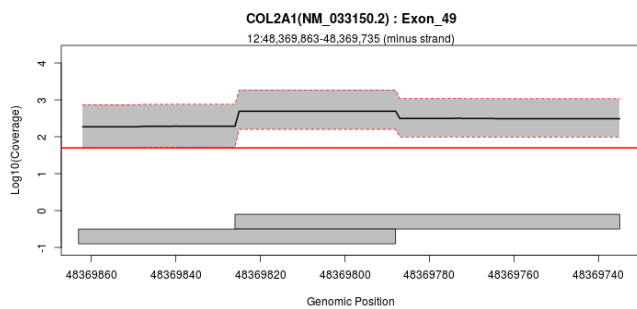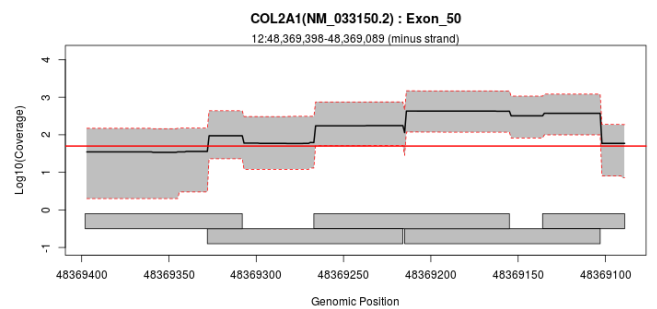

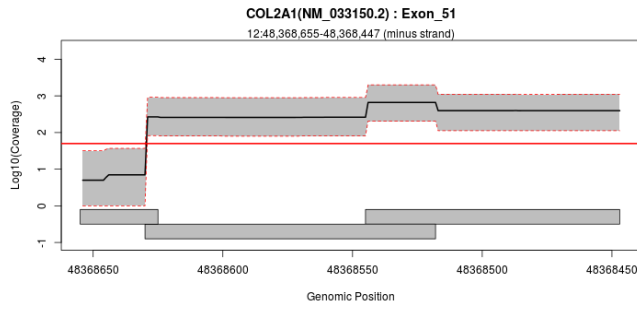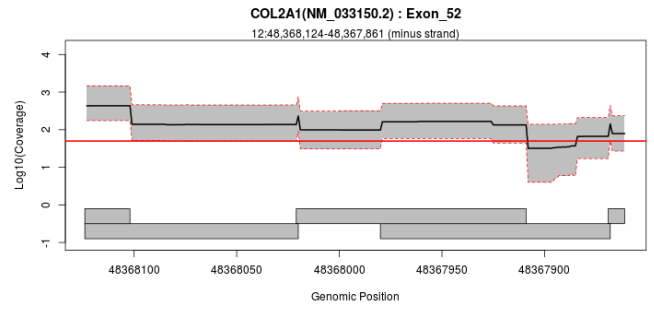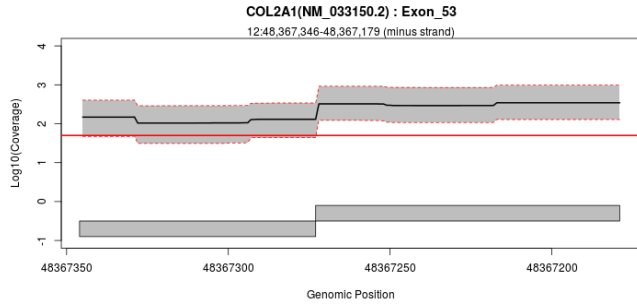

### Exon Overview: COL5A1 : NM\_000093.4

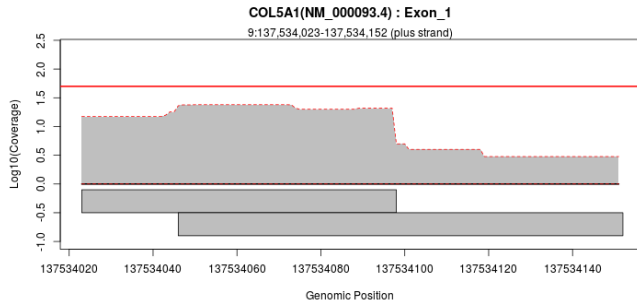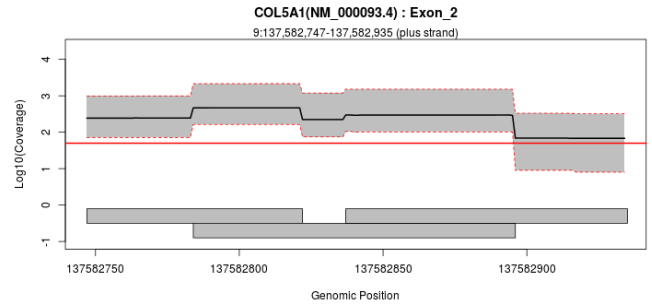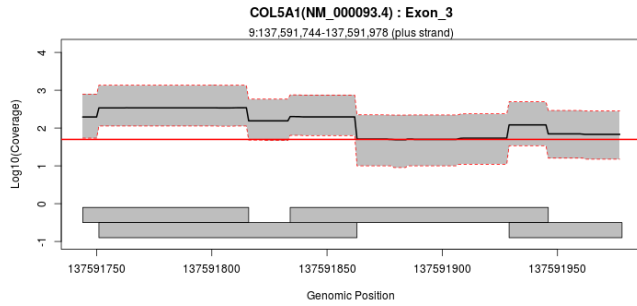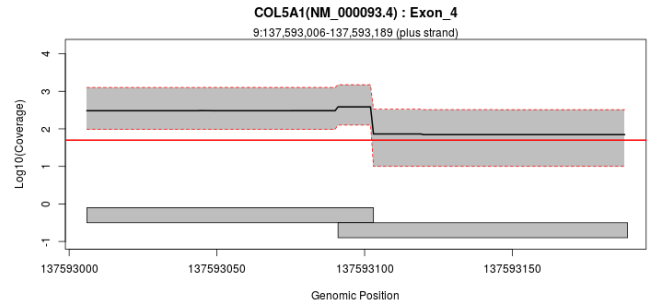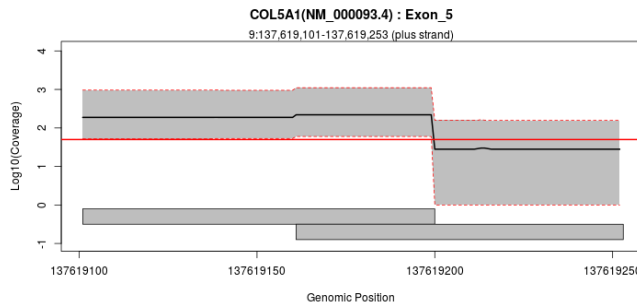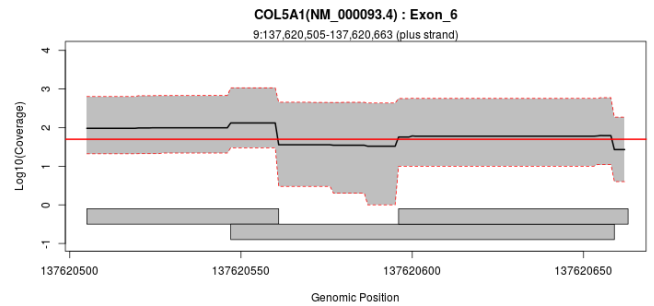

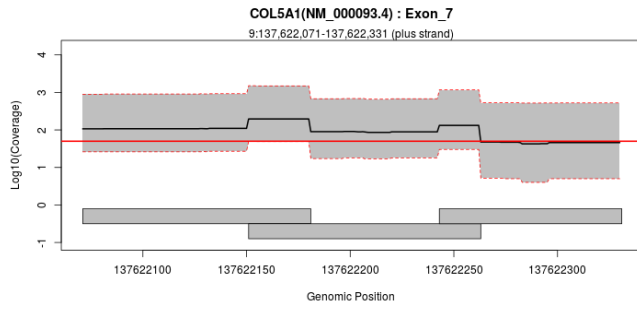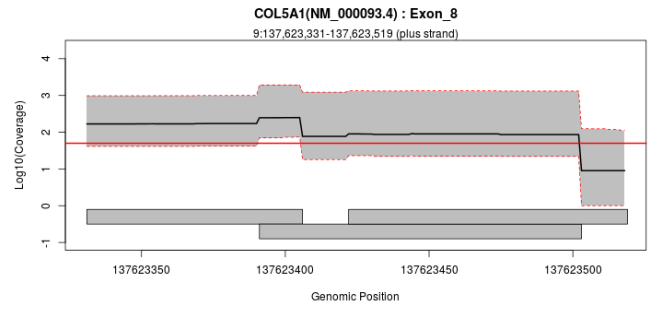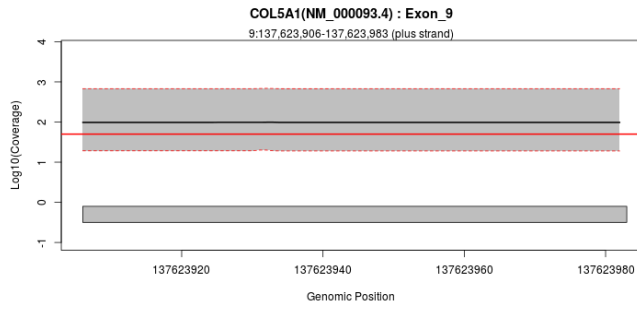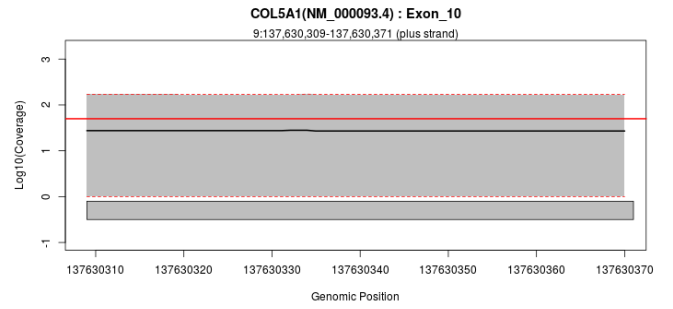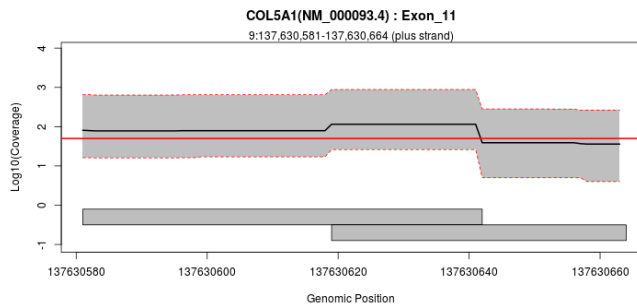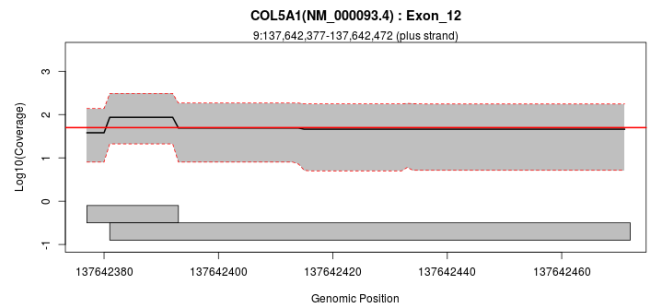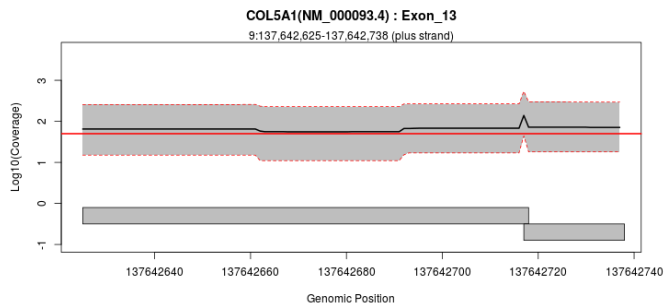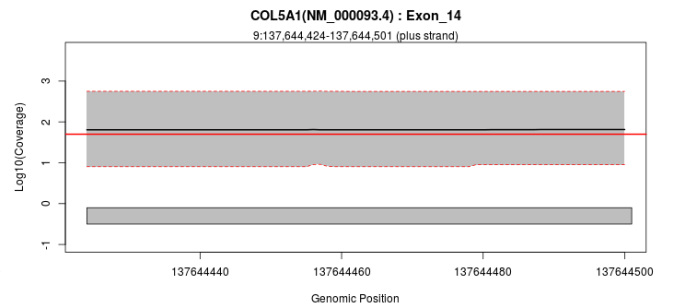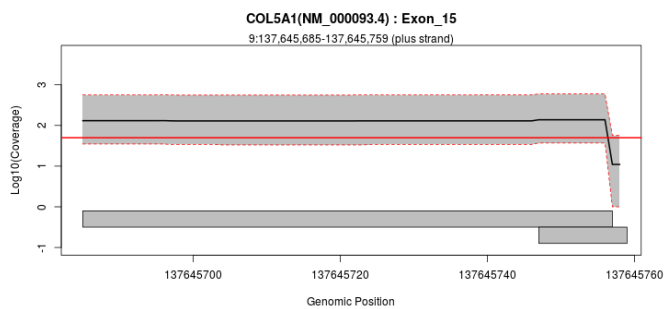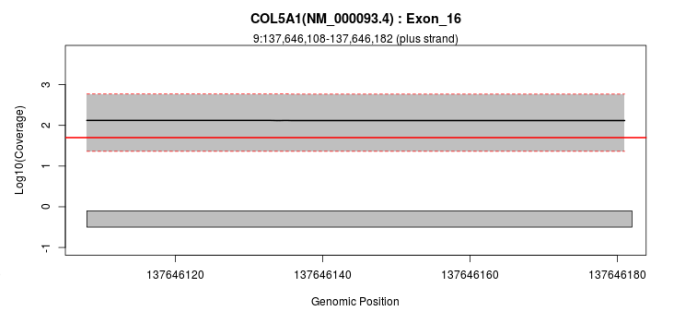



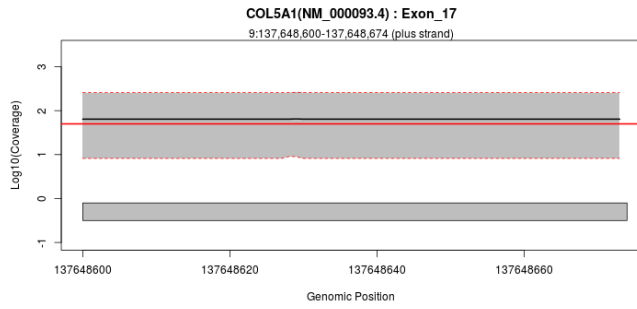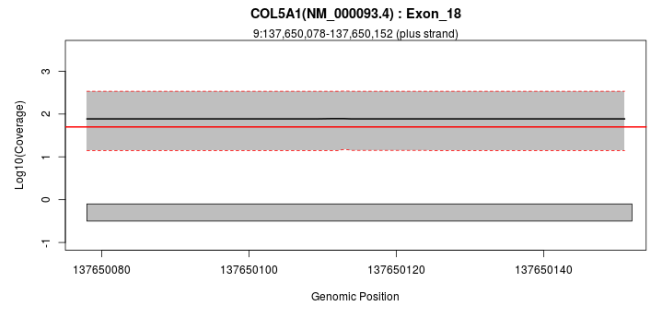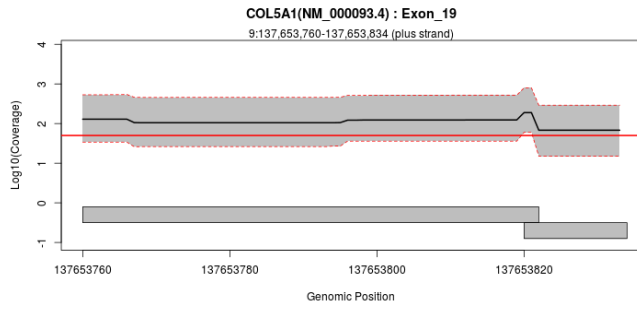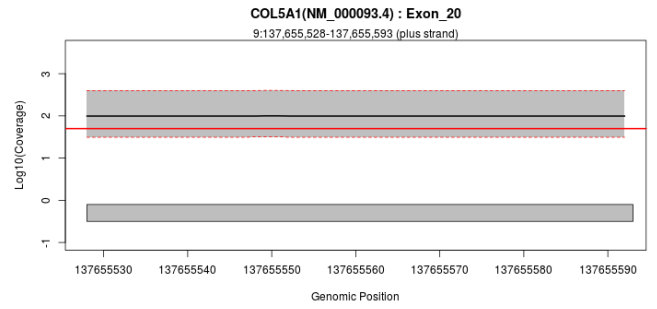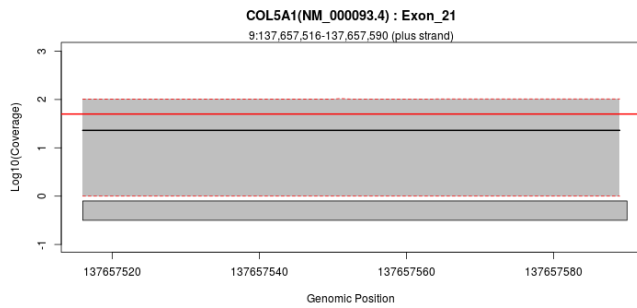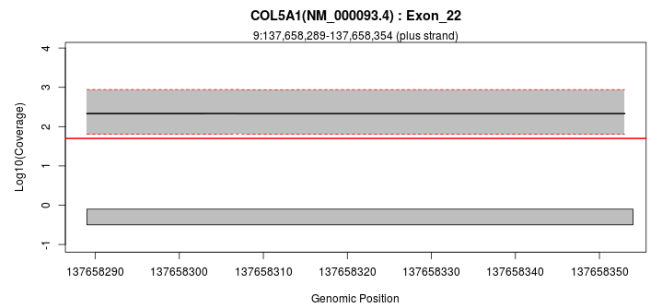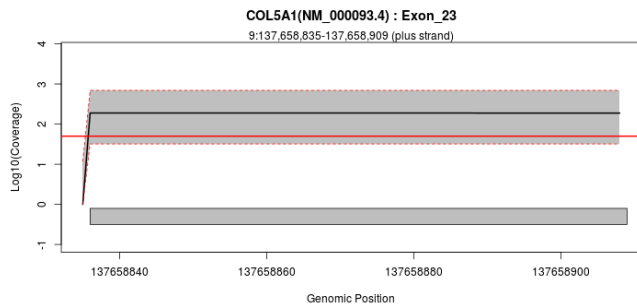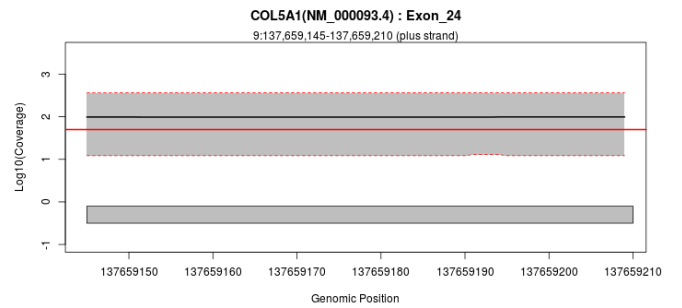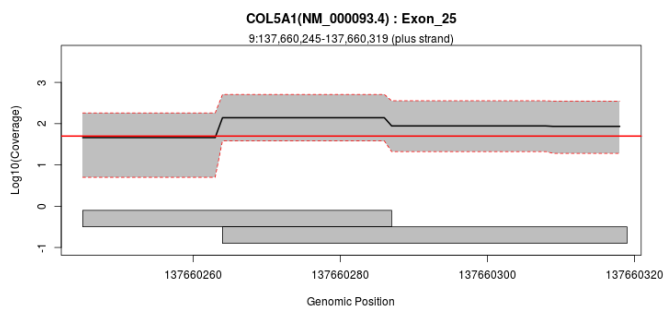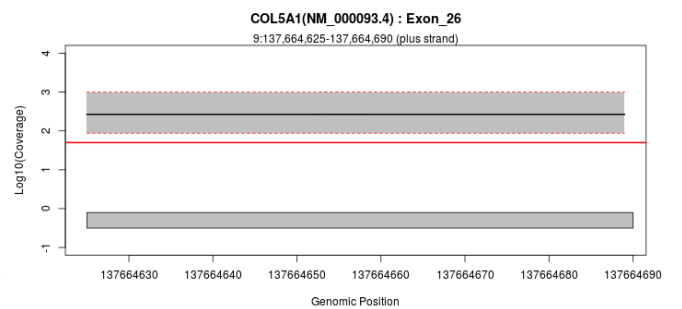

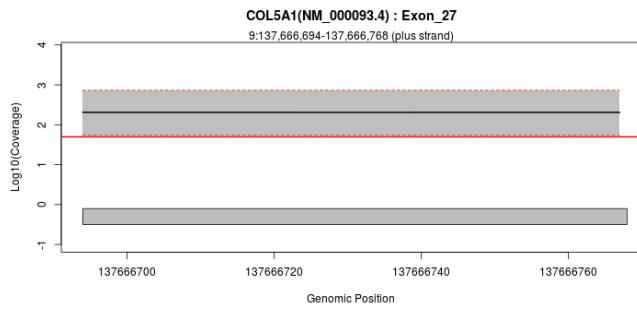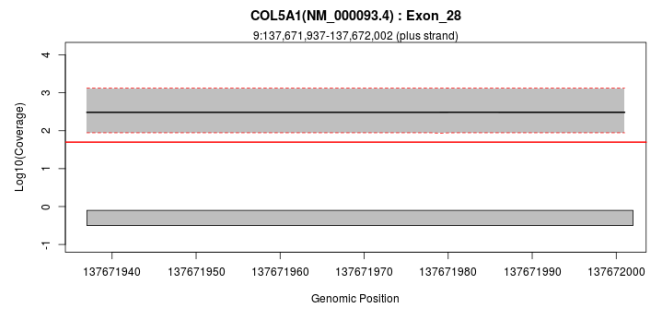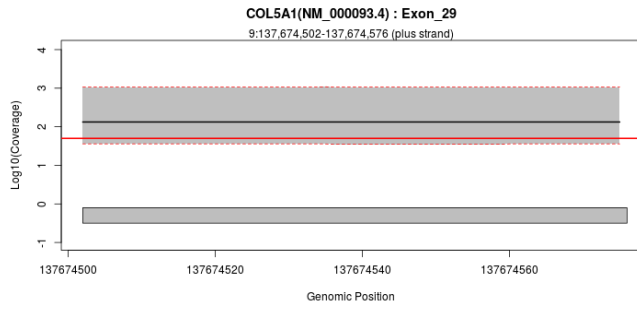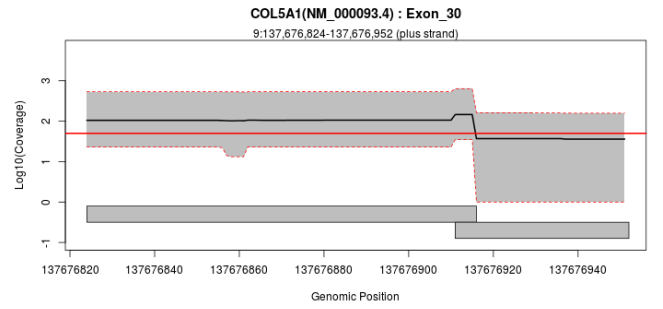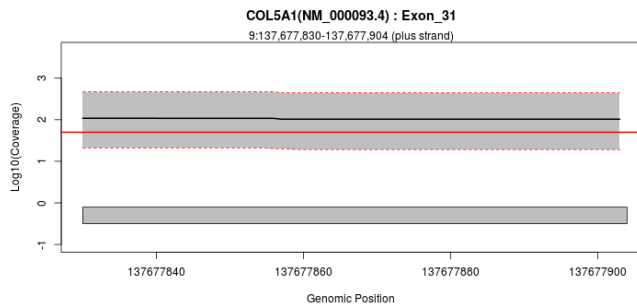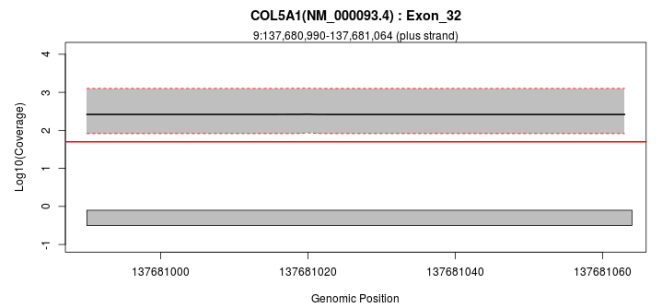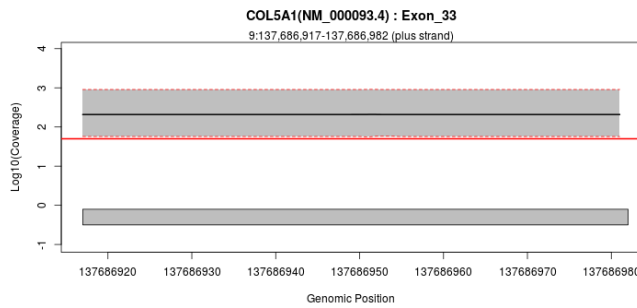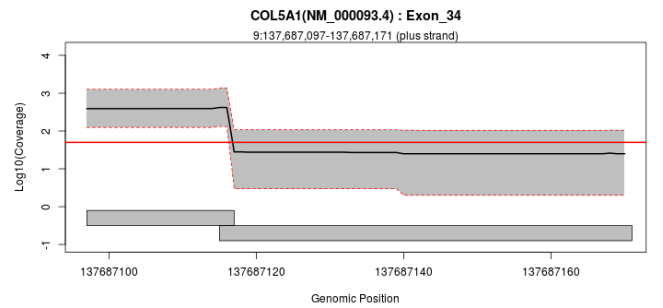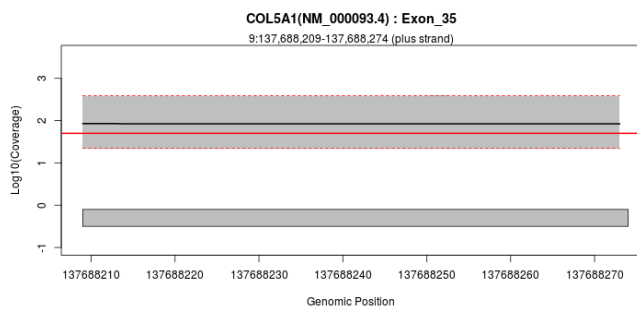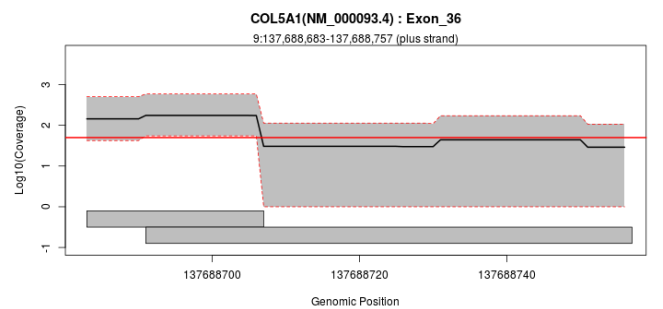

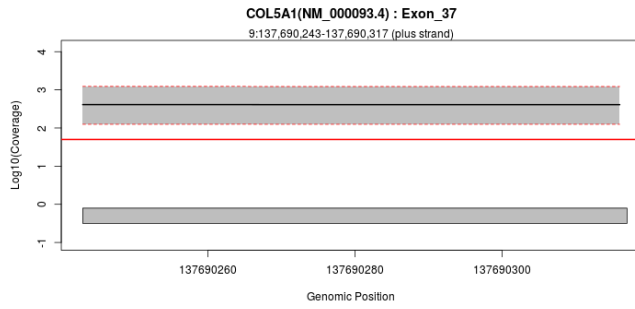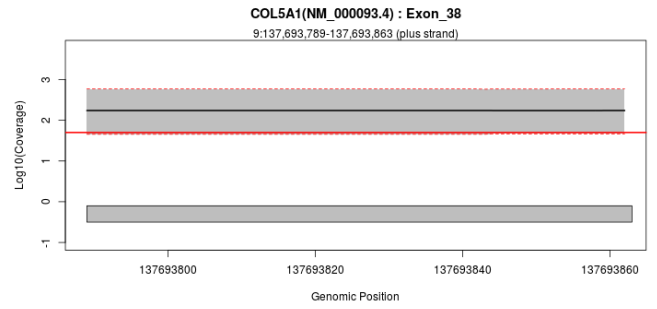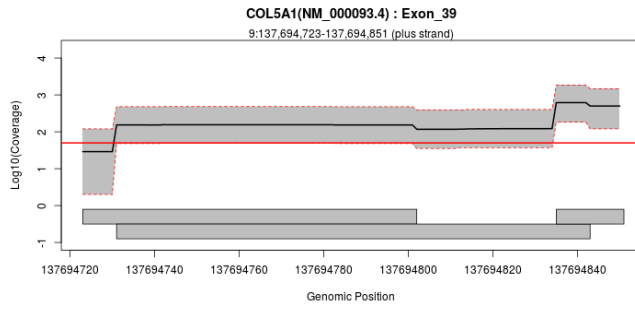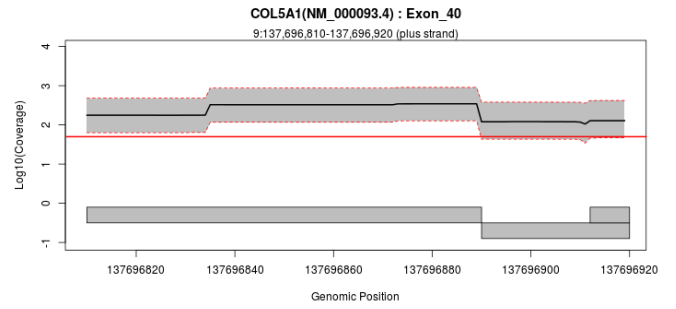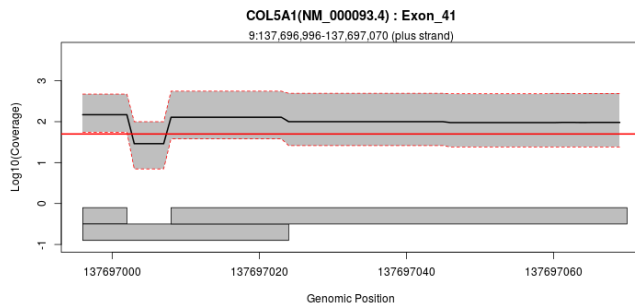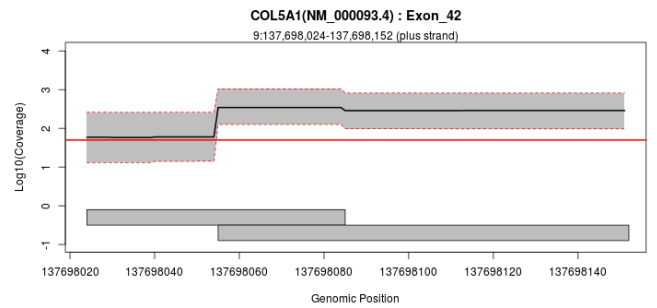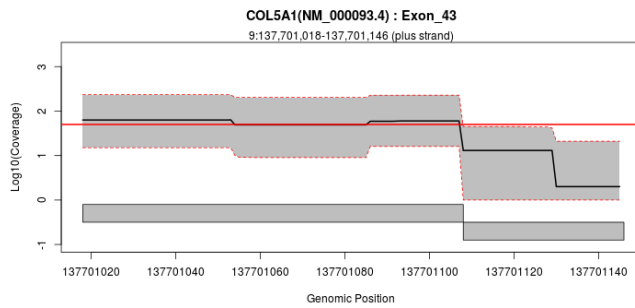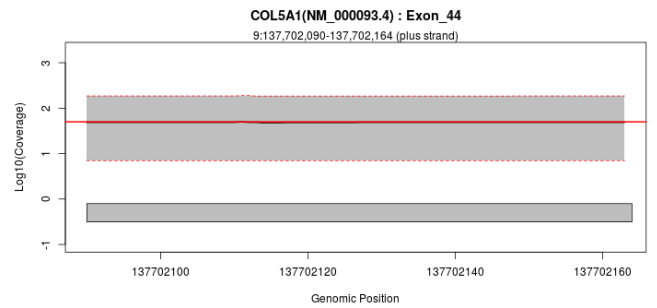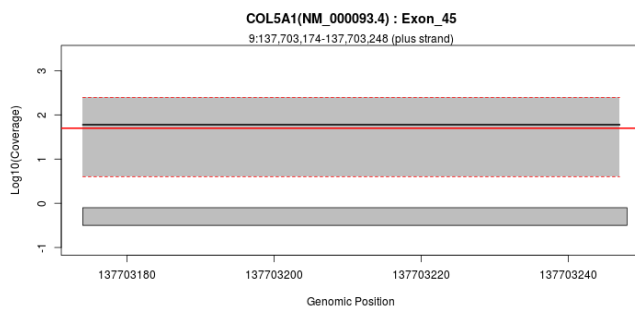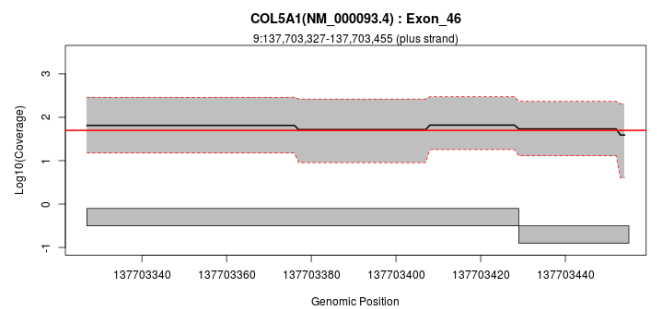

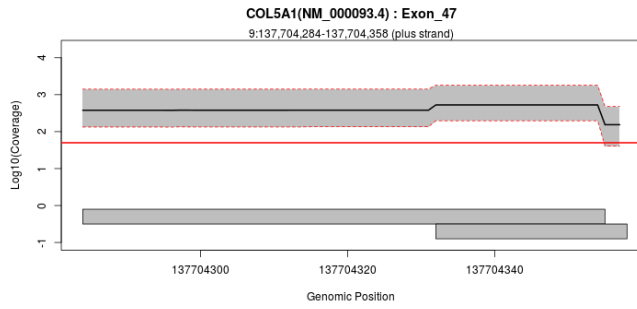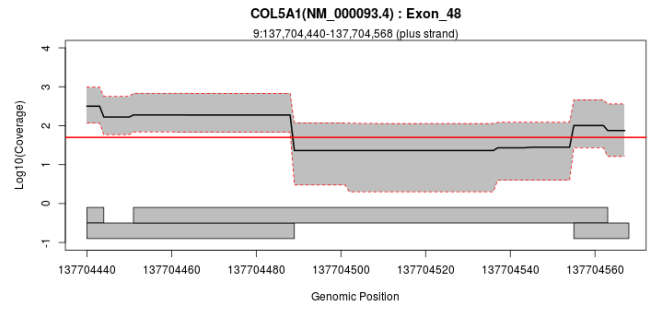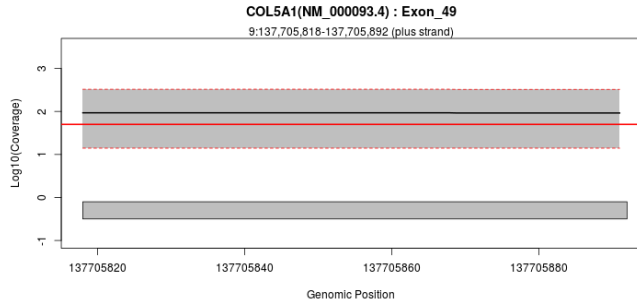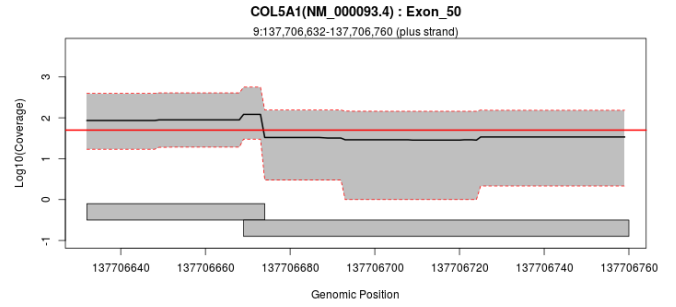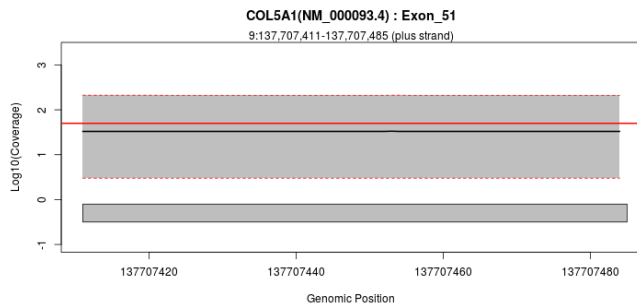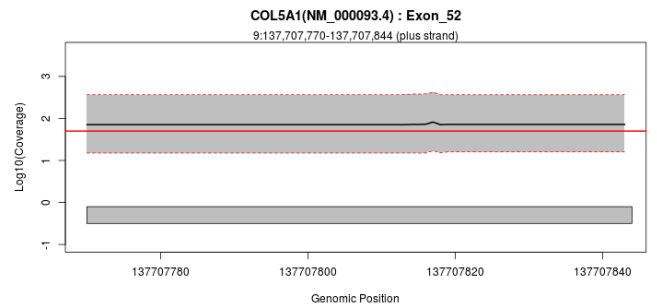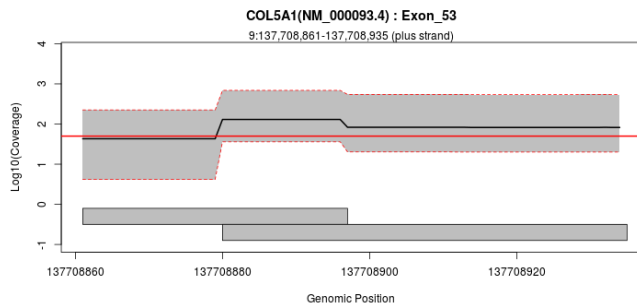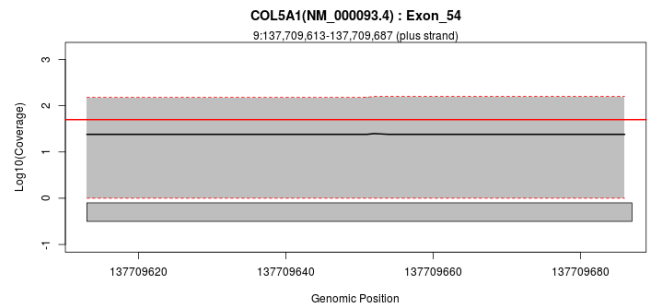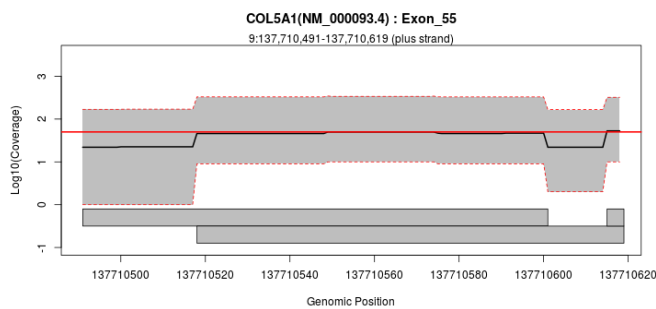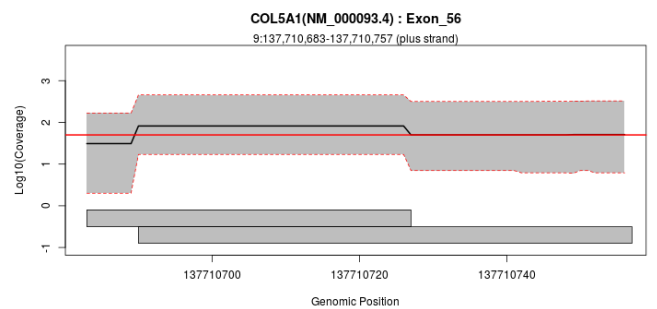

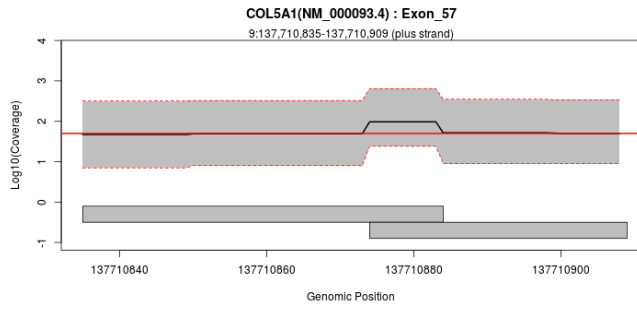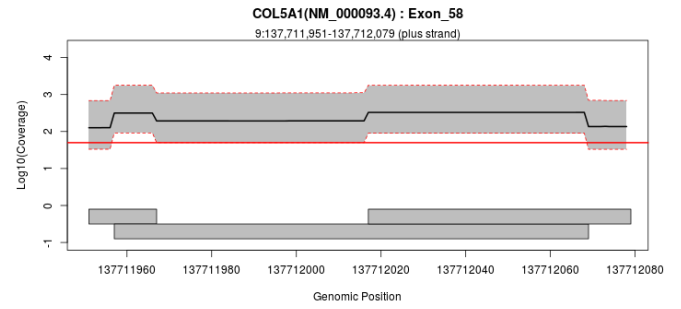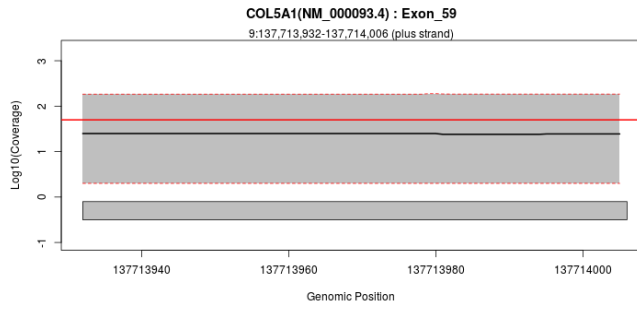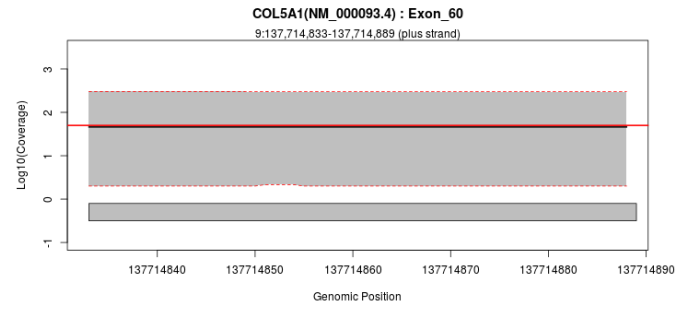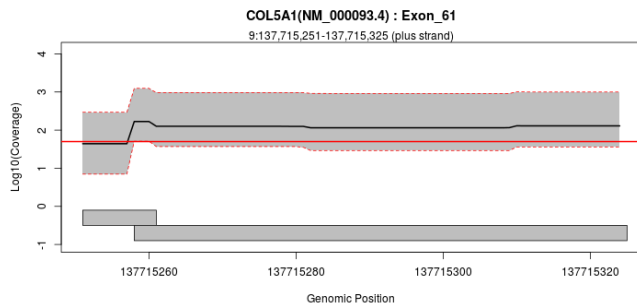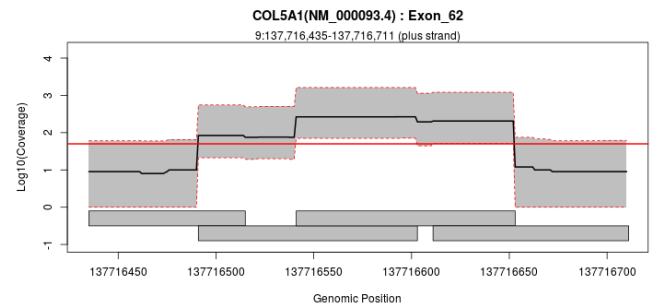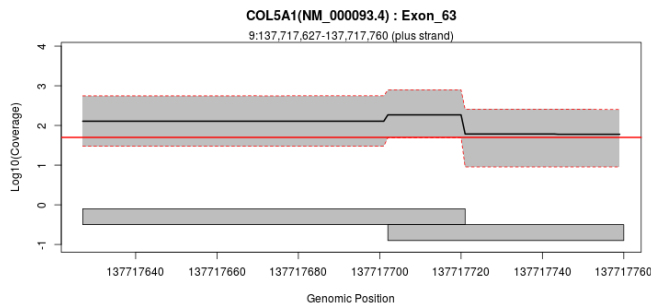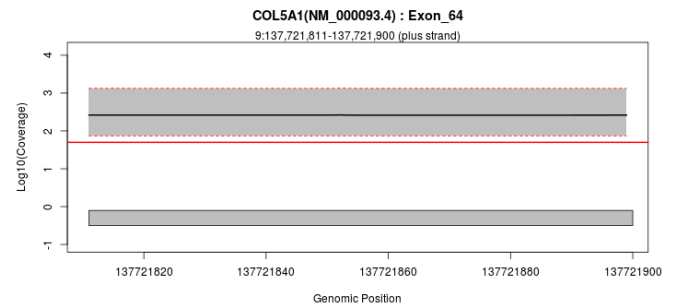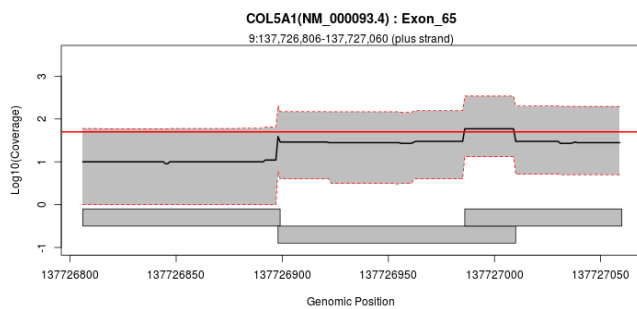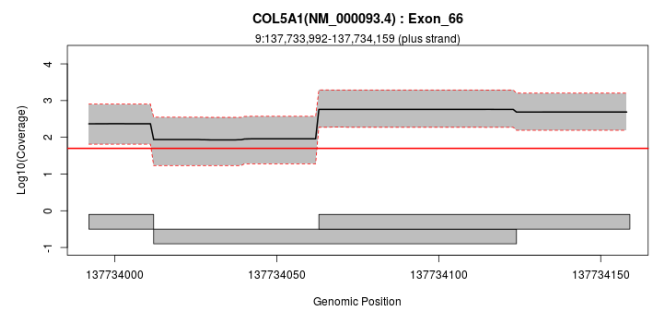

# Exon Overview: COL5A1 : NM\_001278074.1

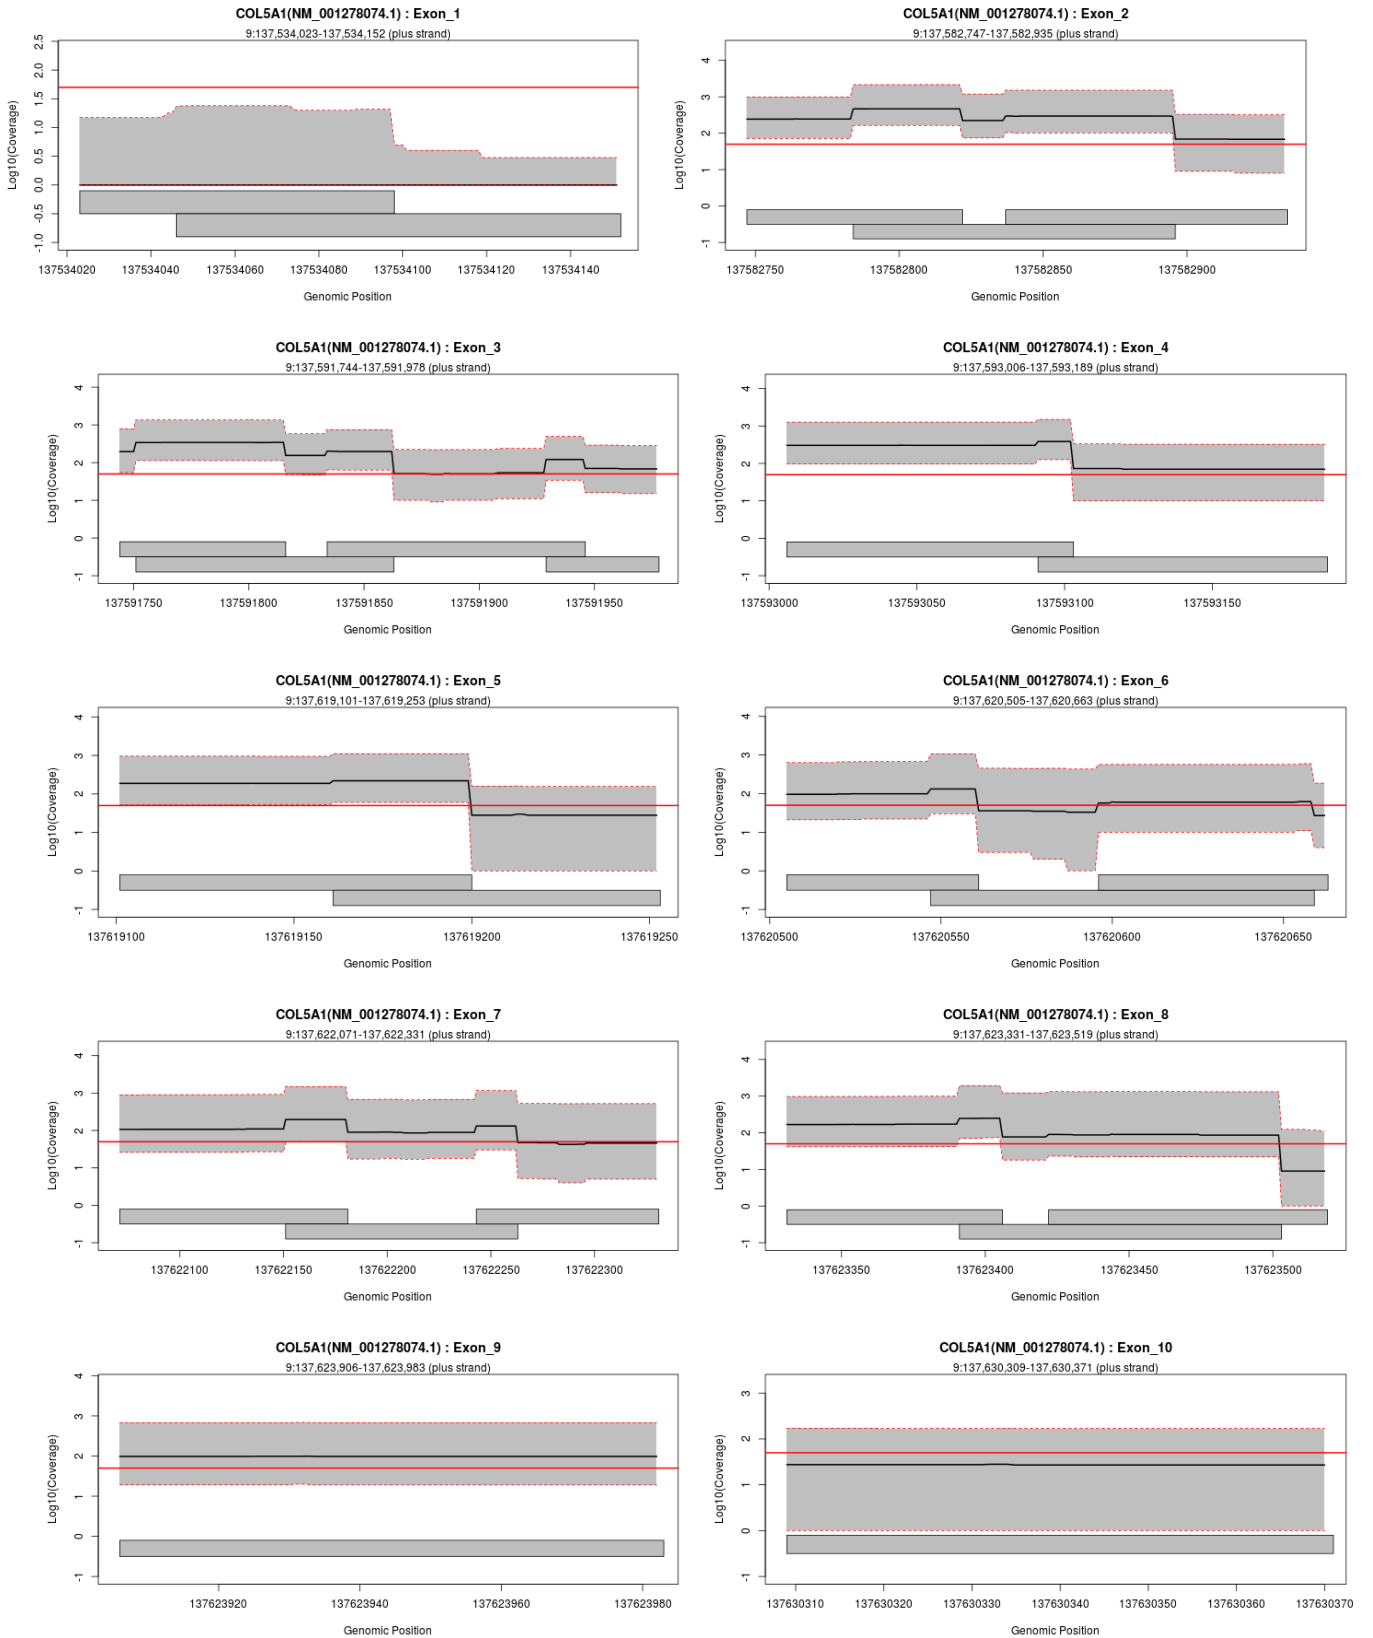

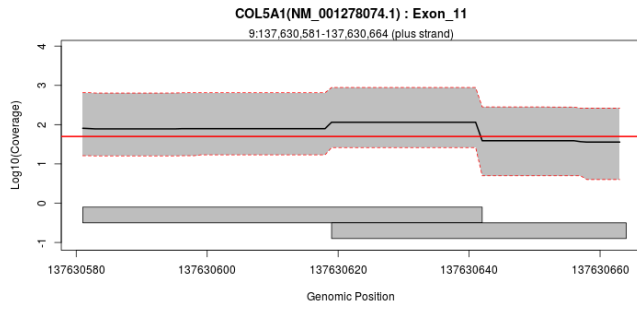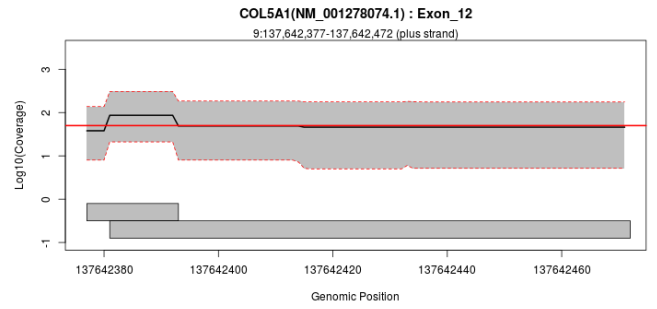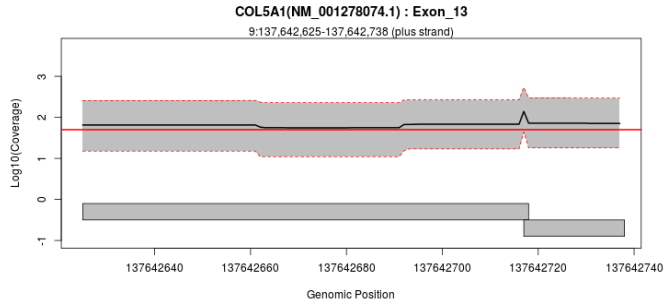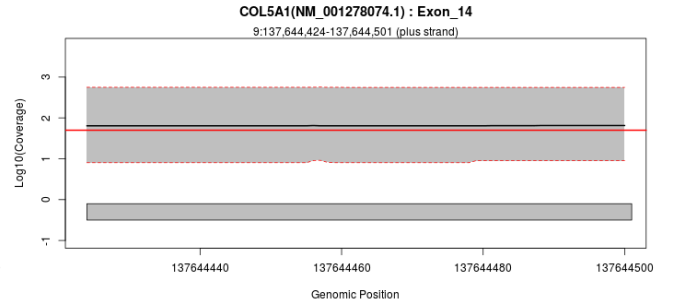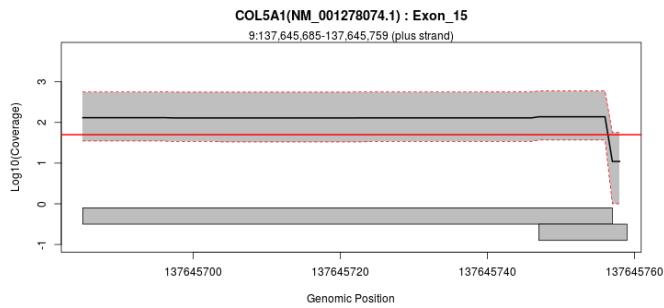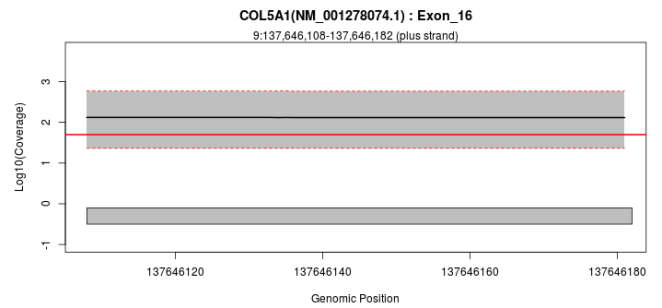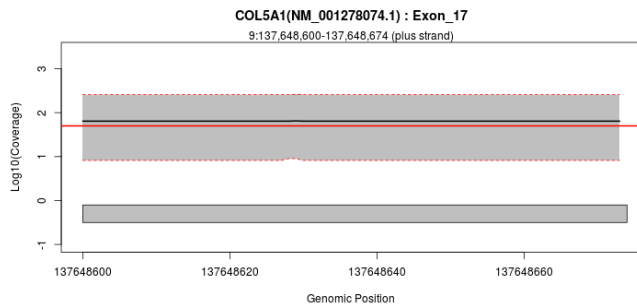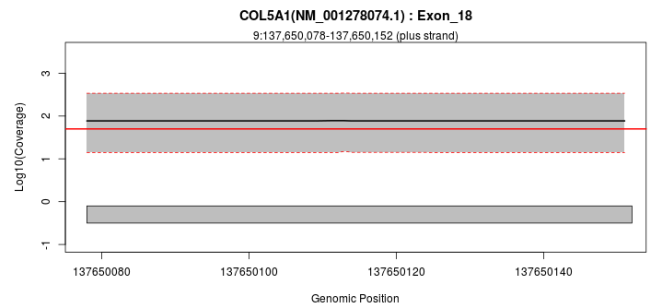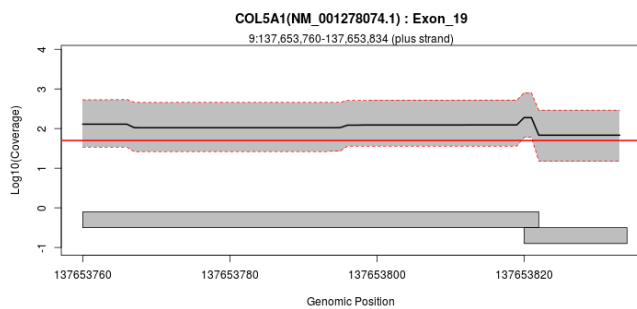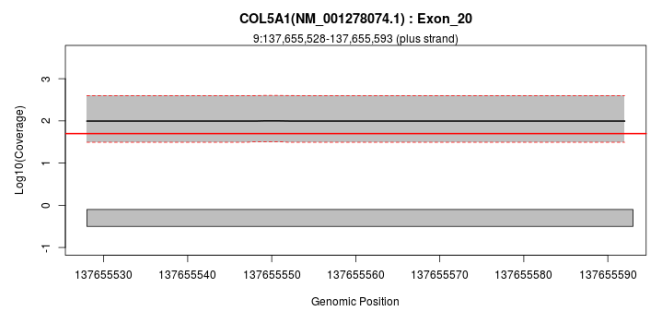

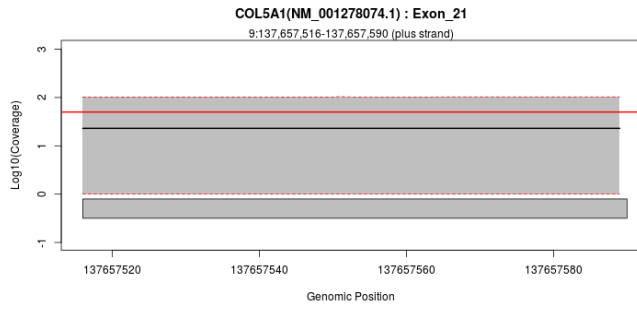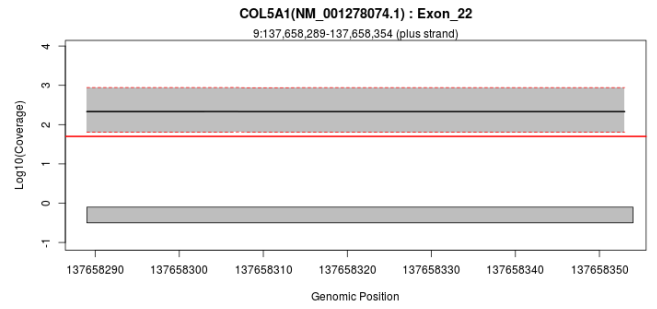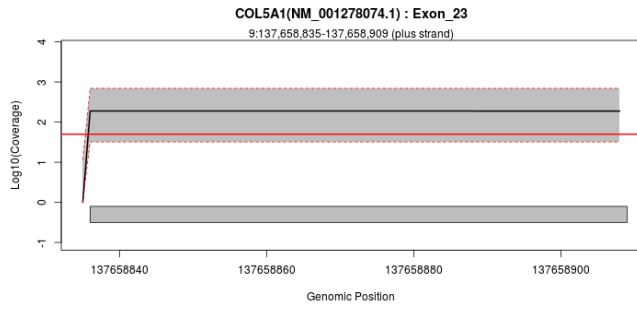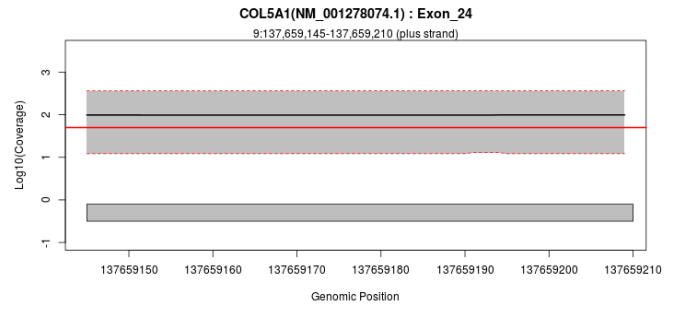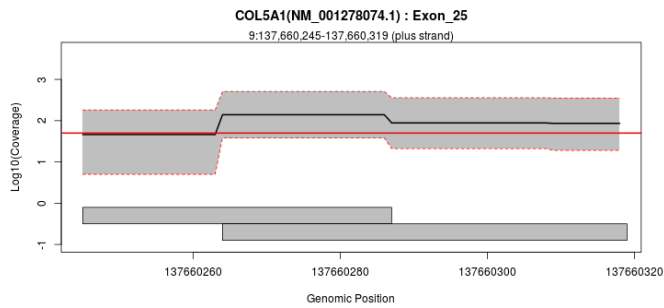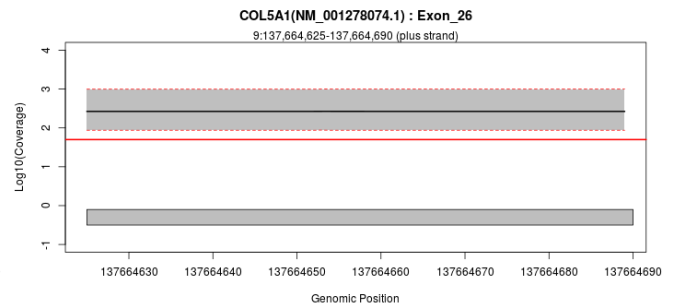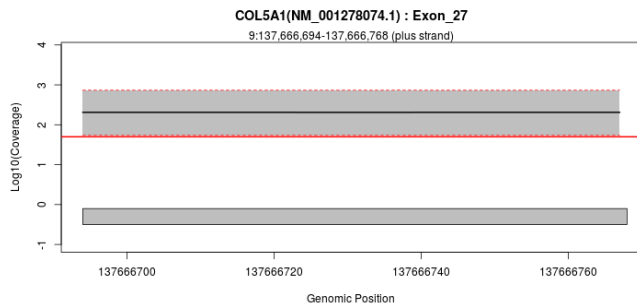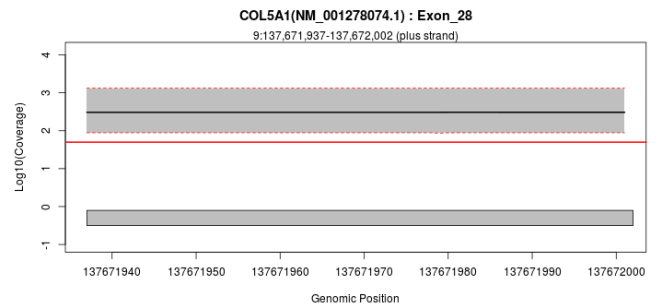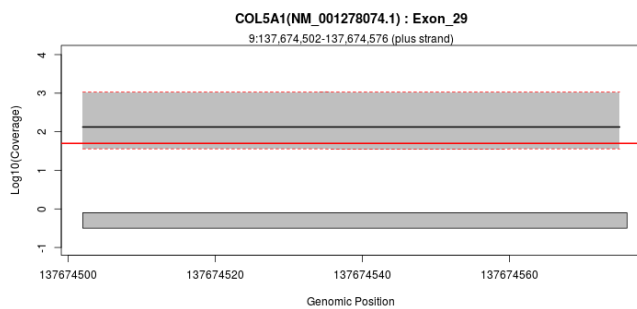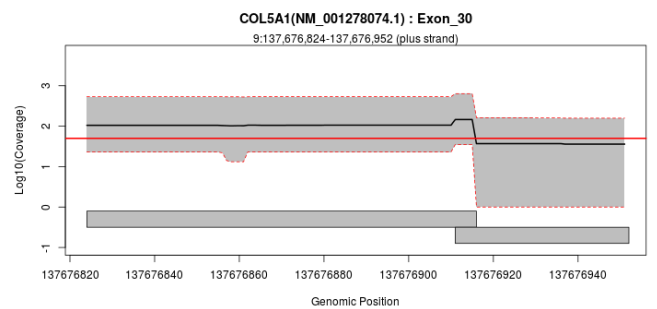



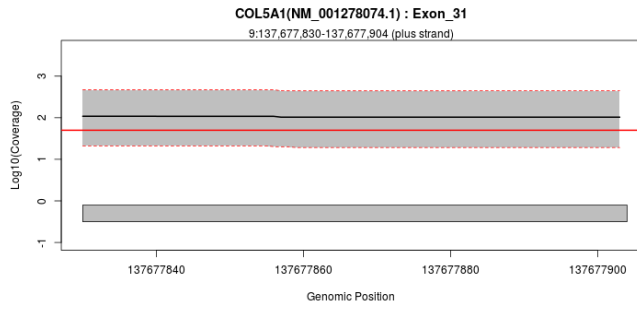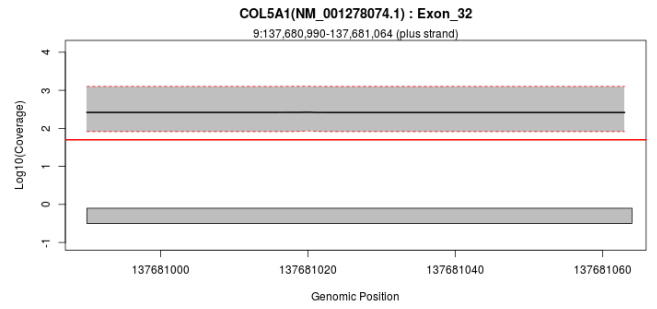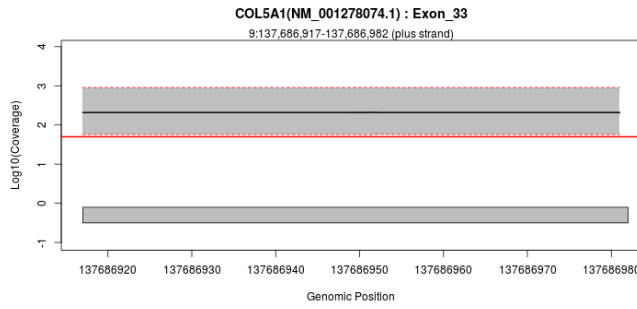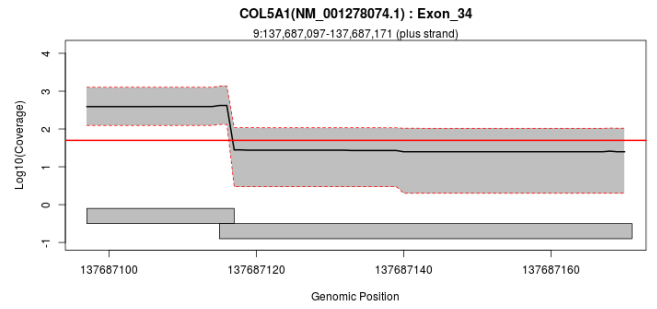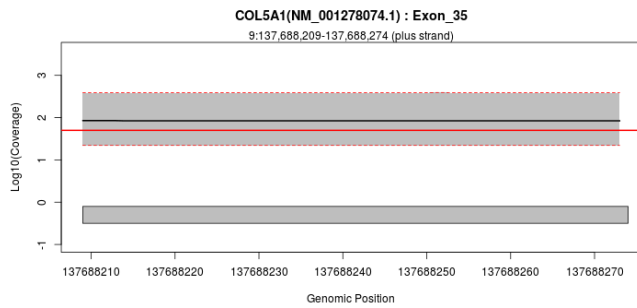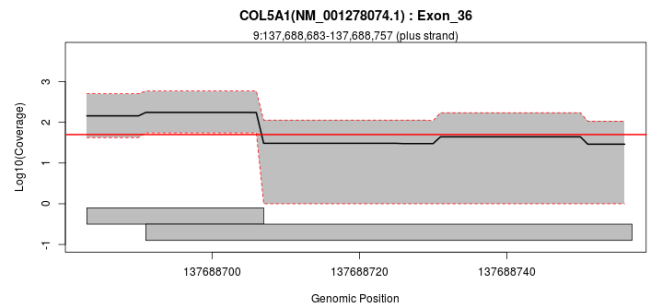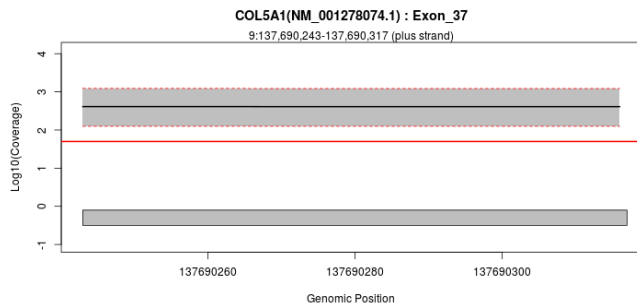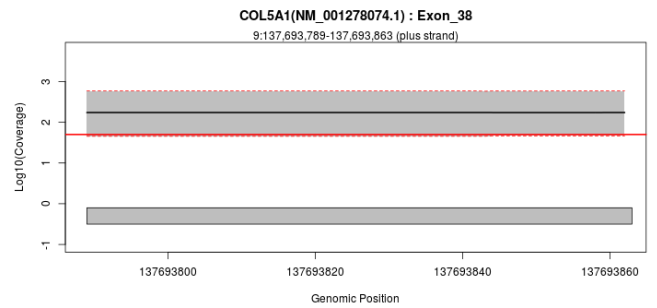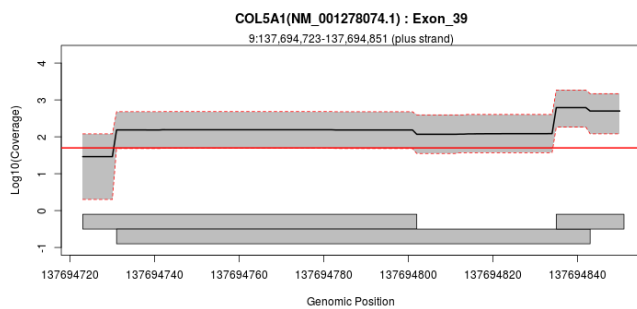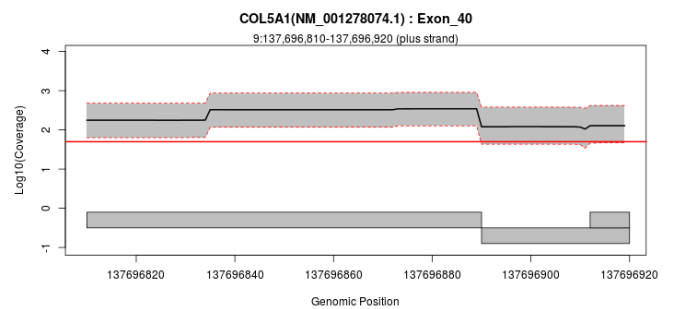

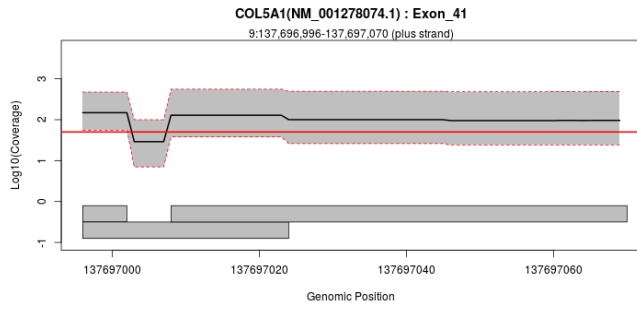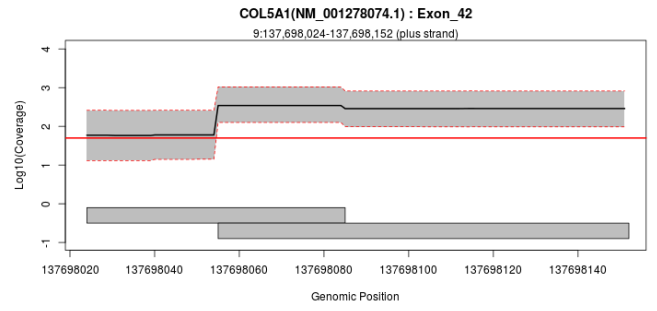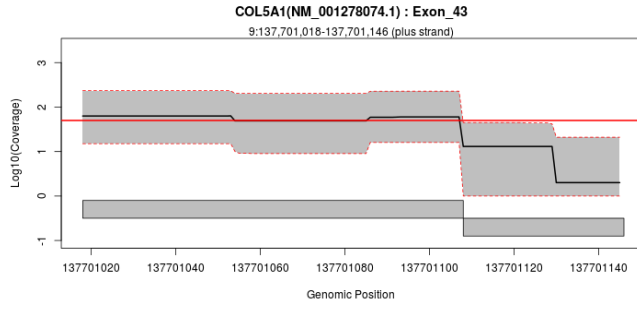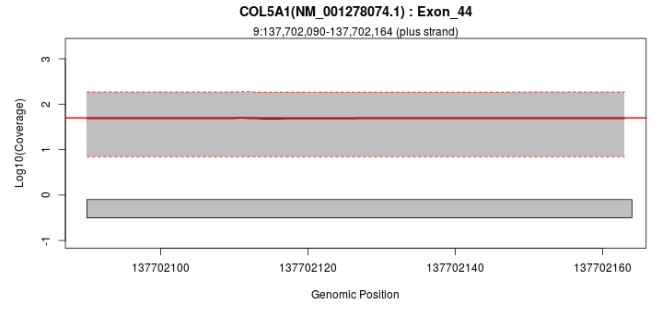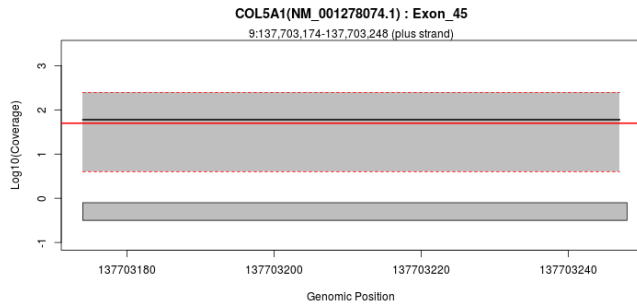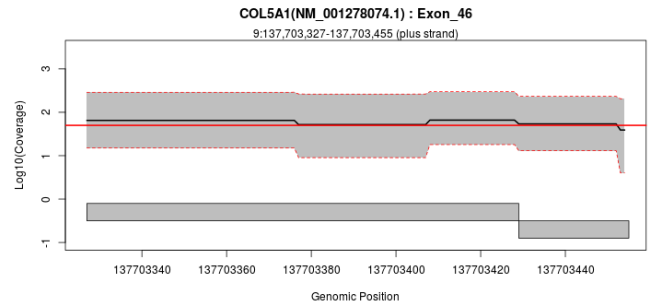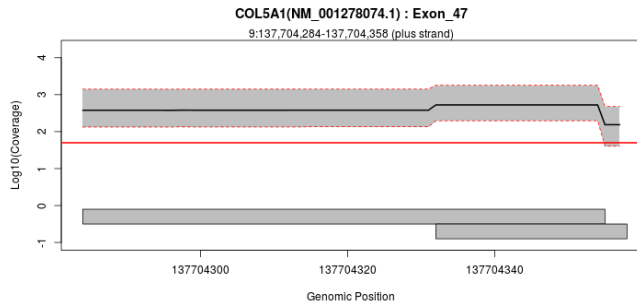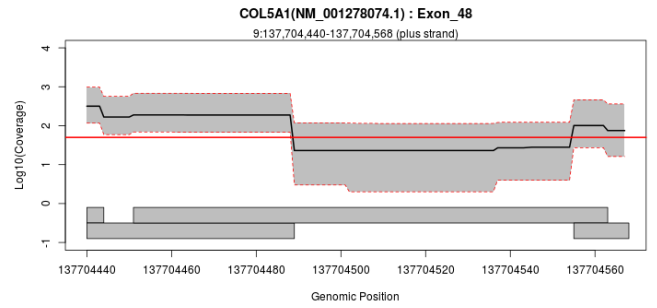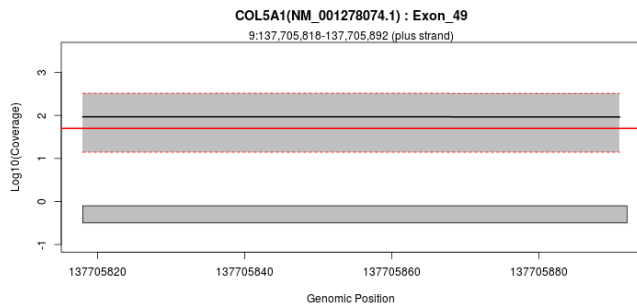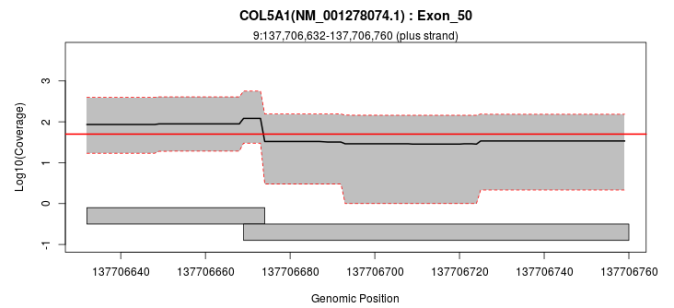

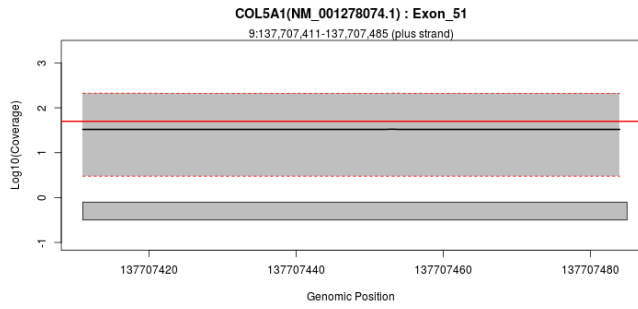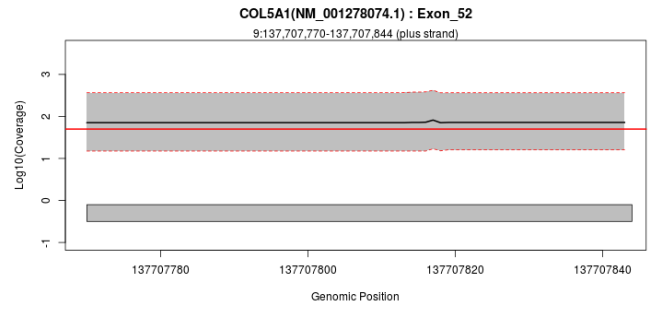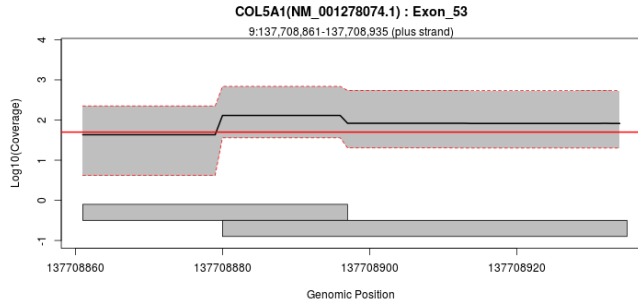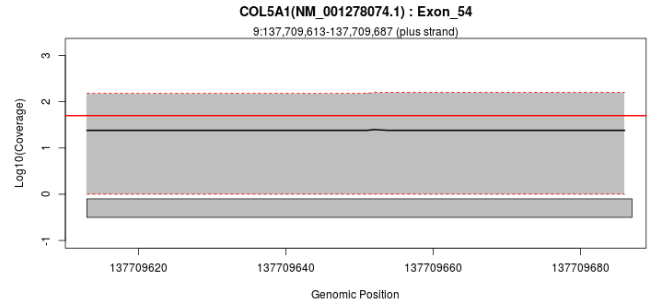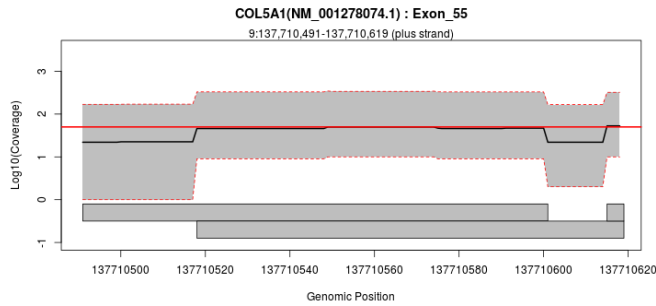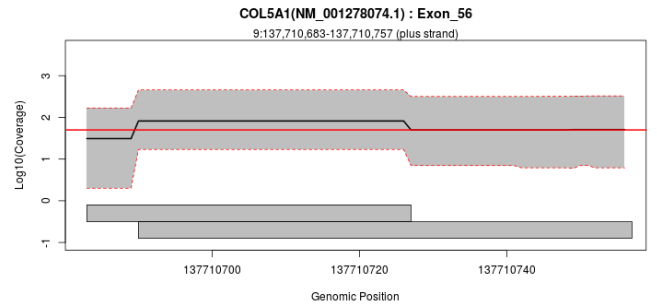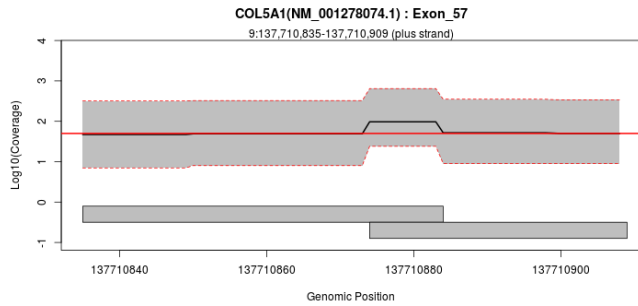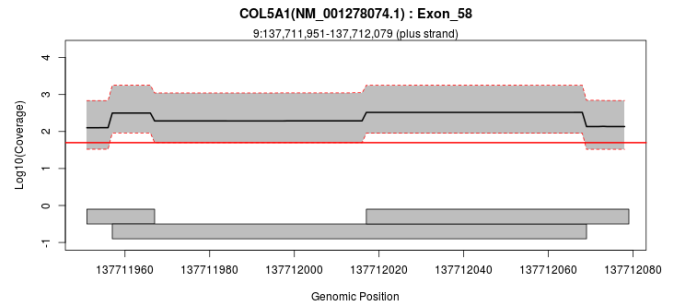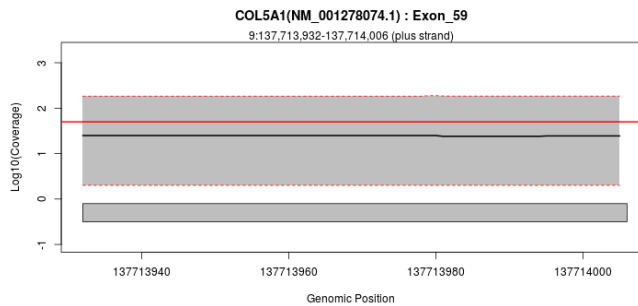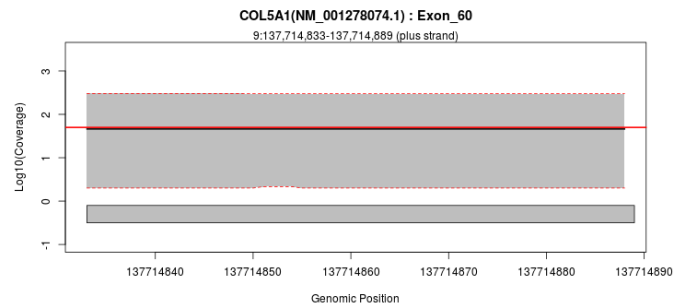

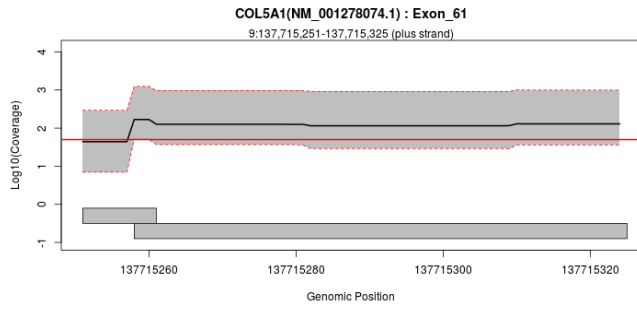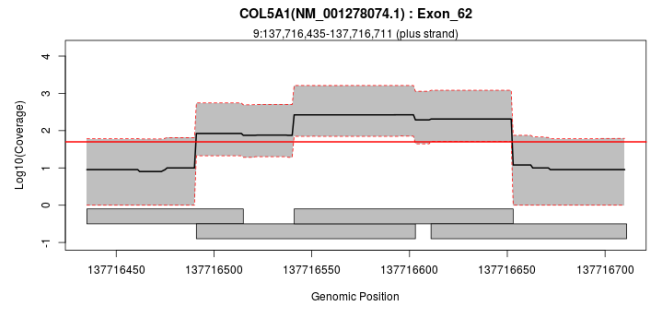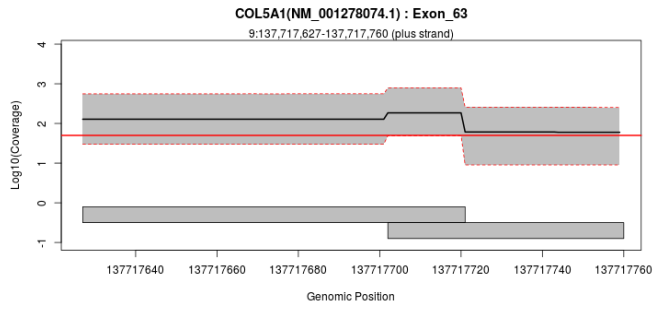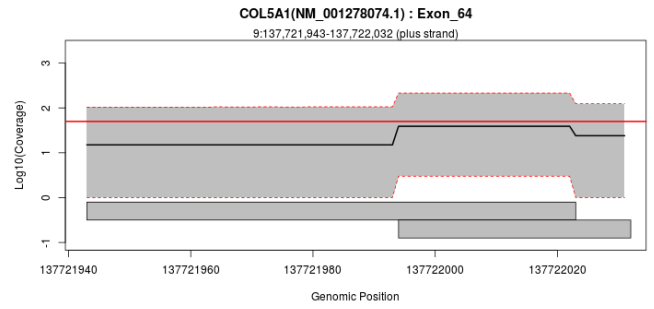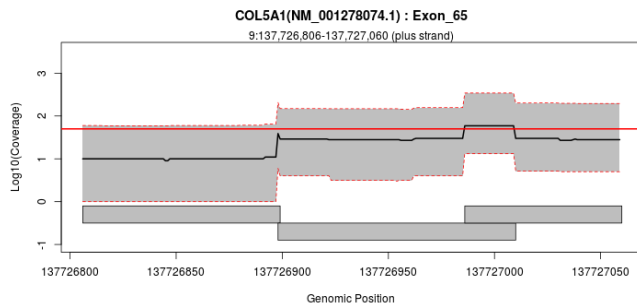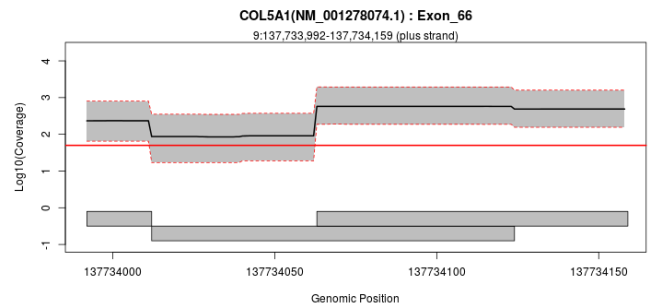

## Exon Overview: COL5A3 : NM\_015719.3

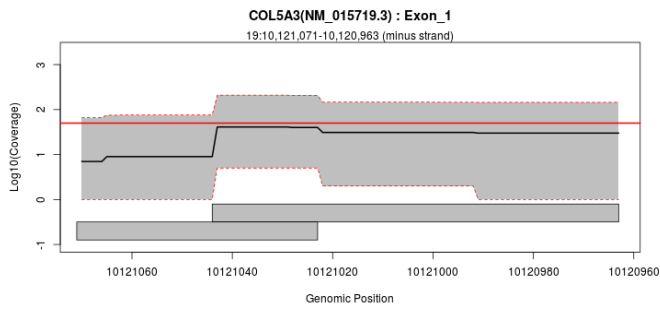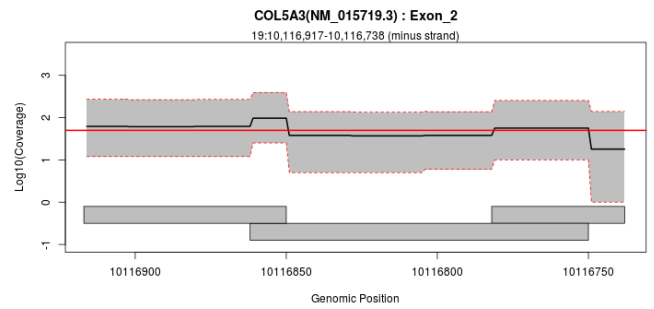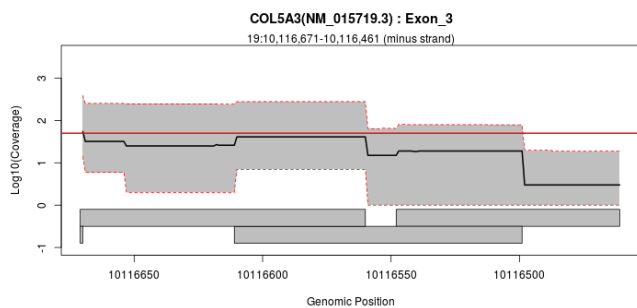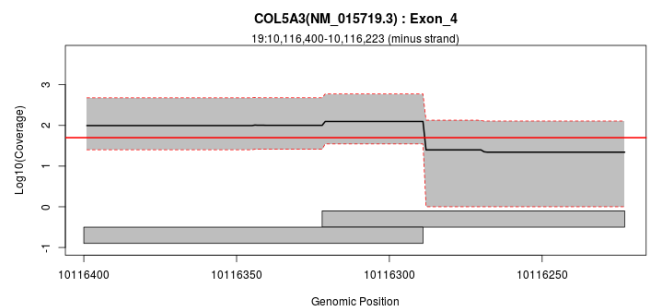

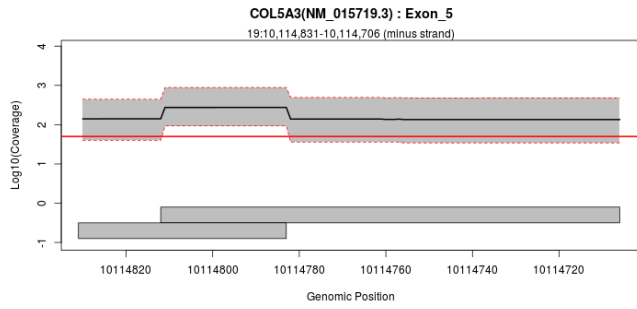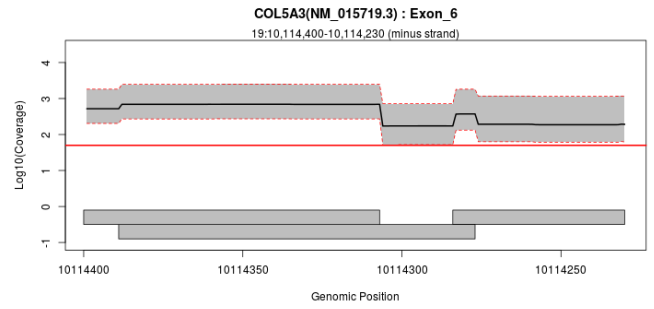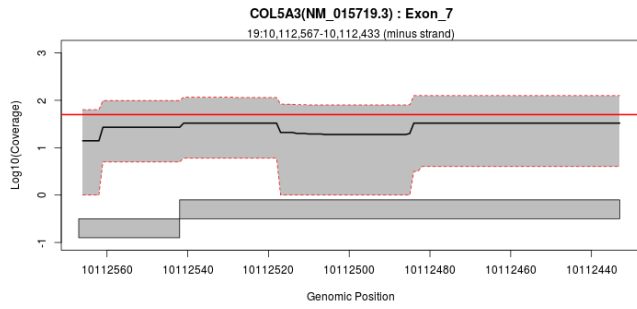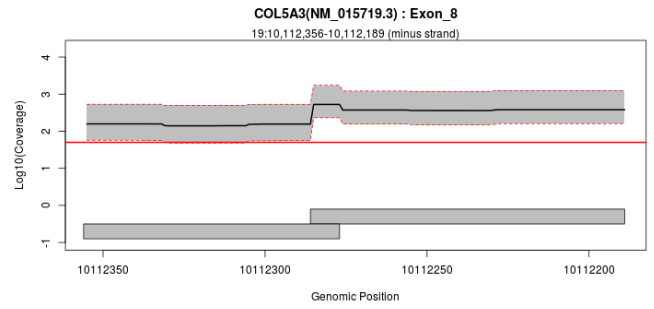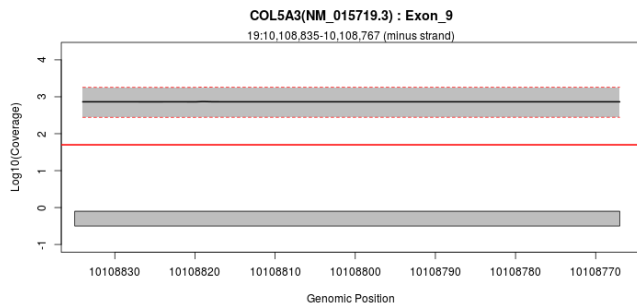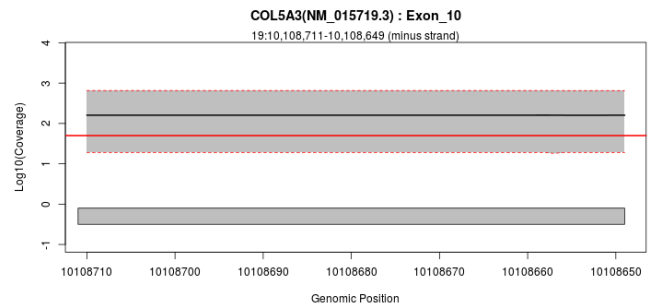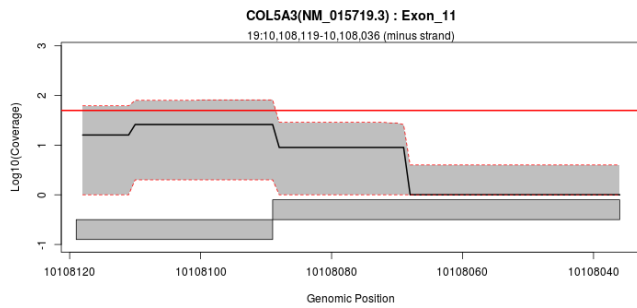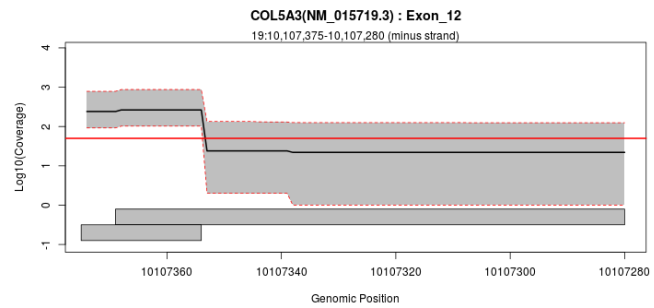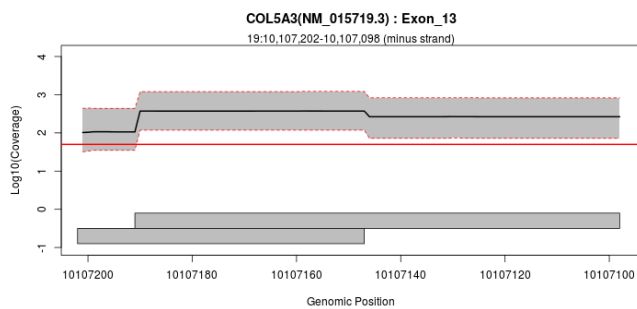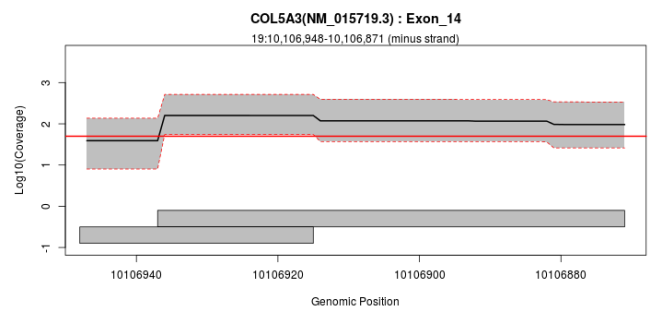

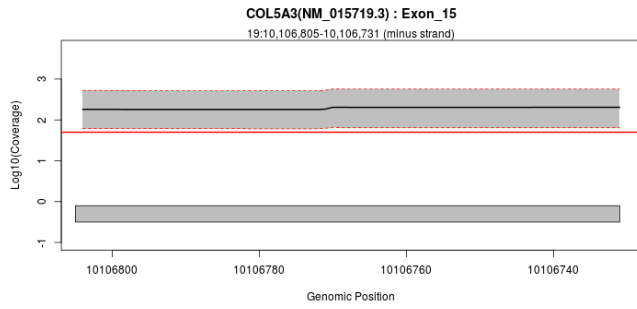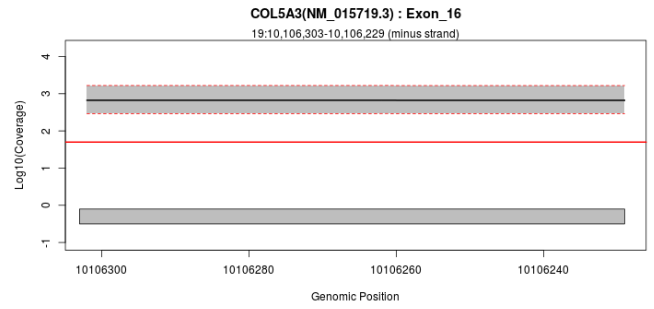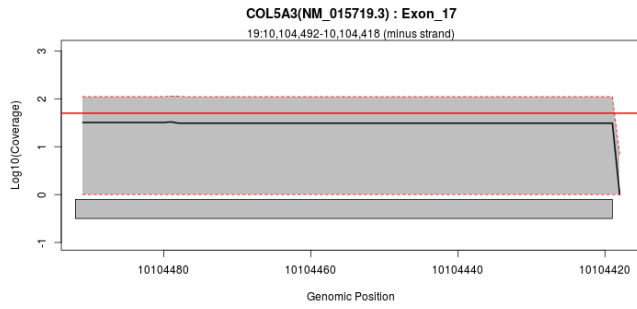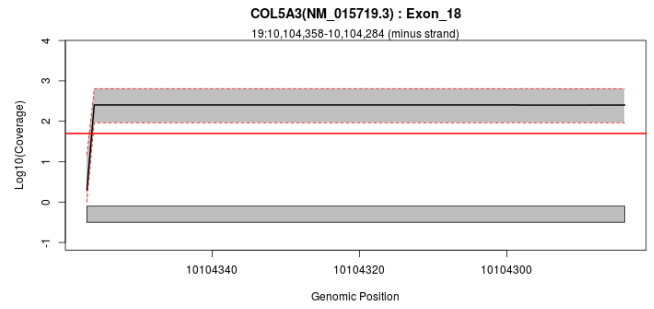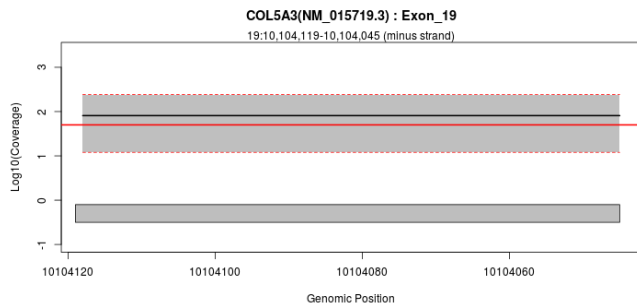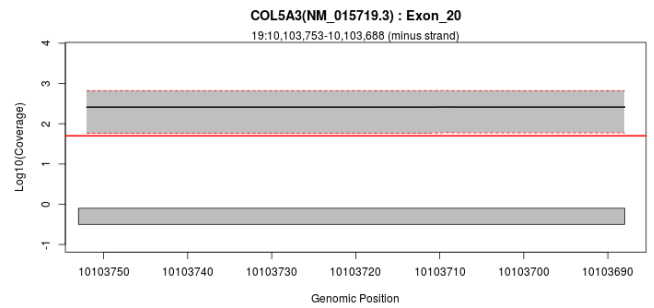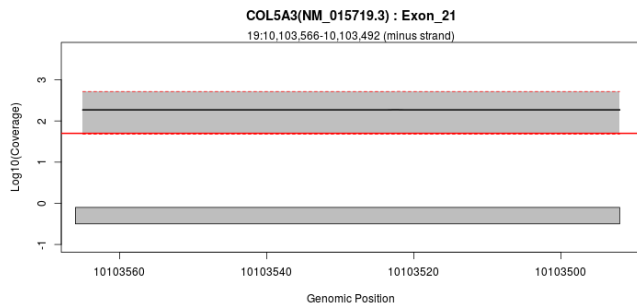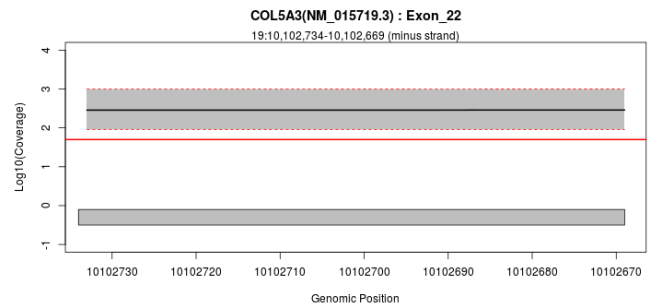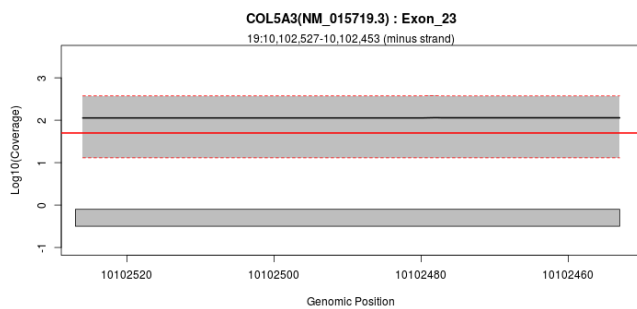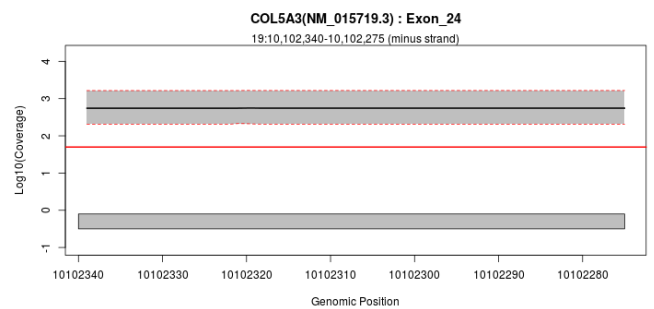

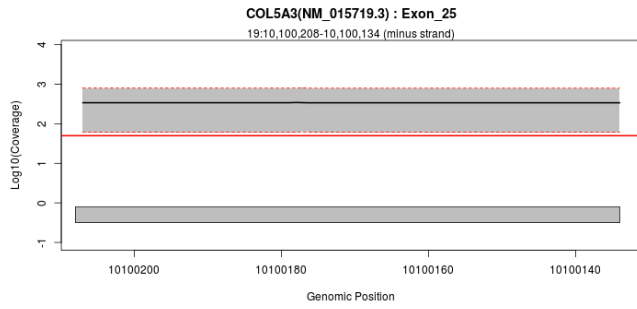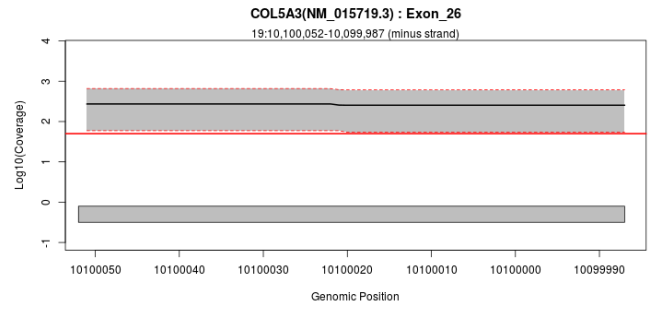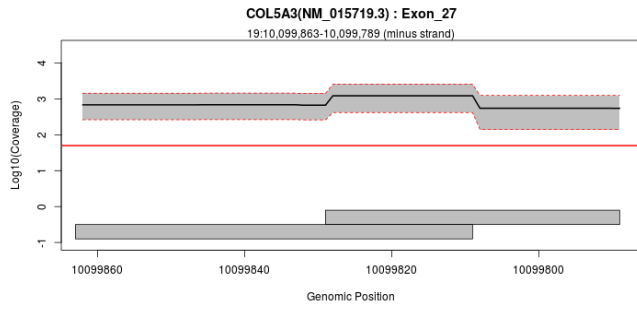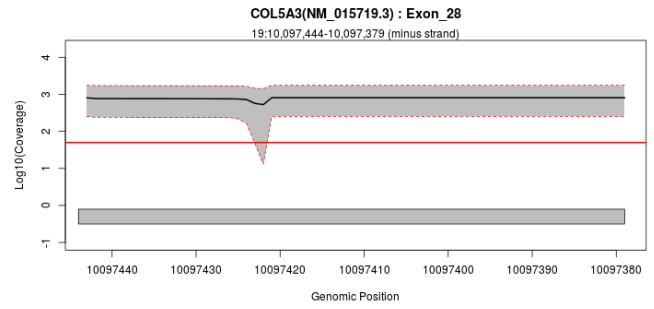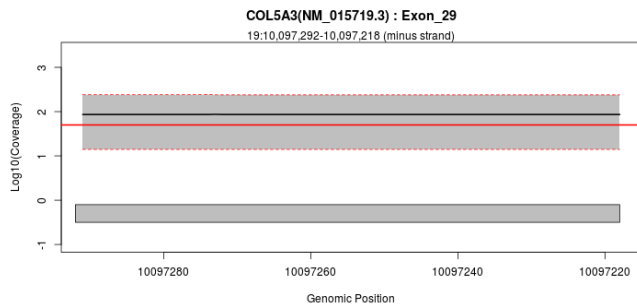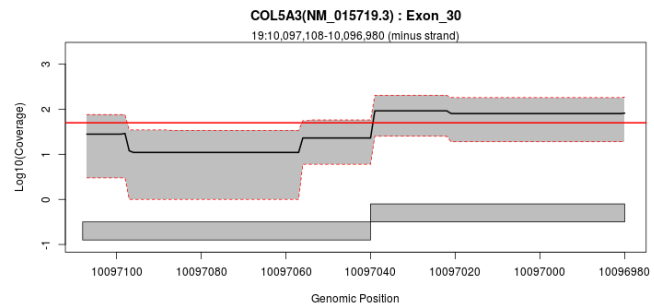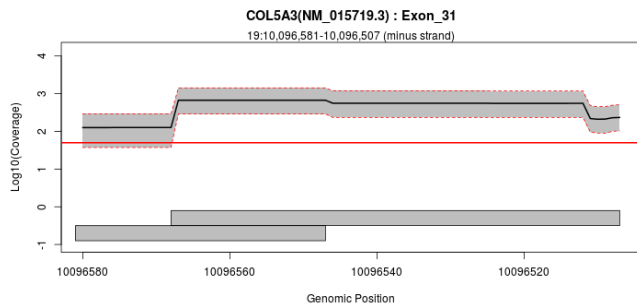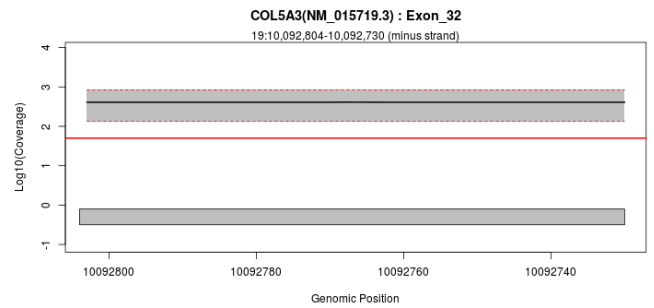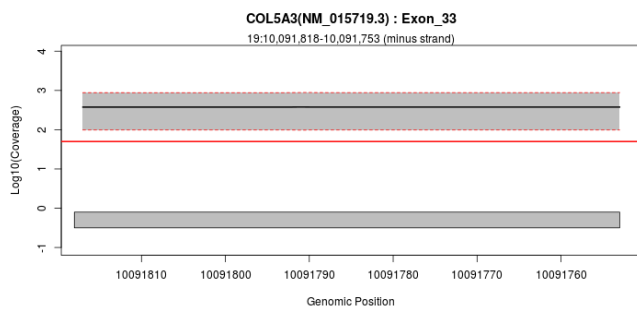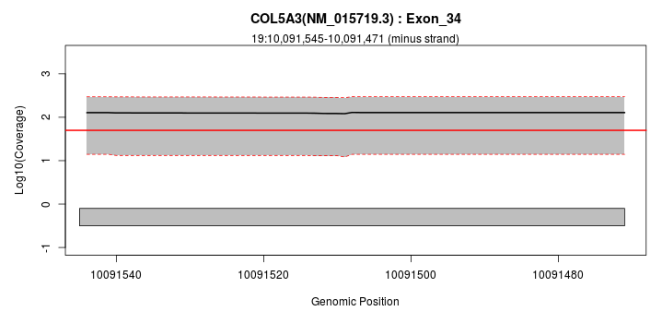

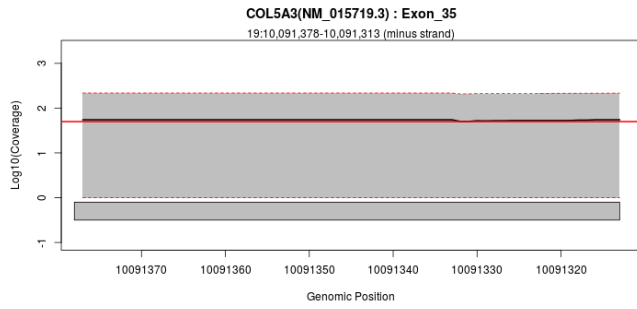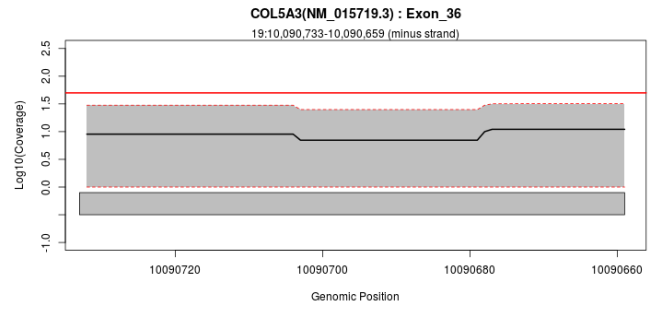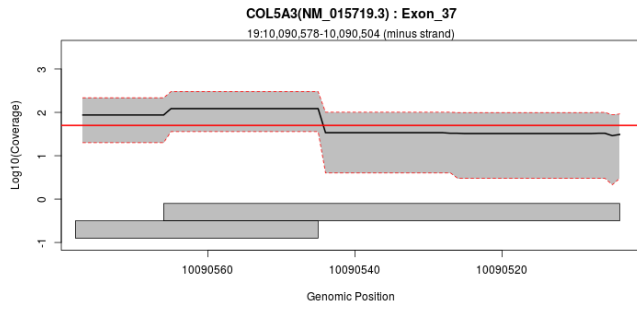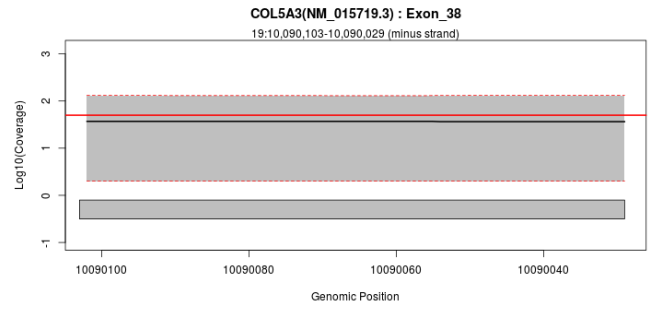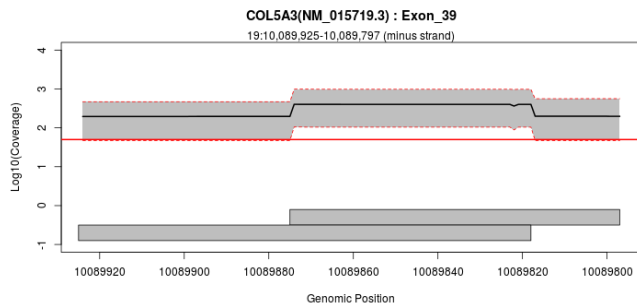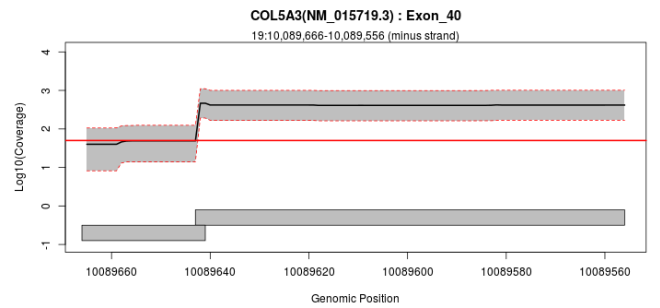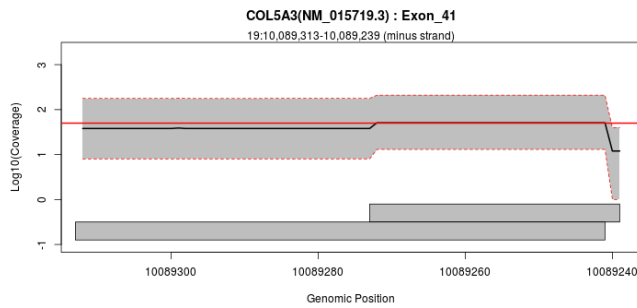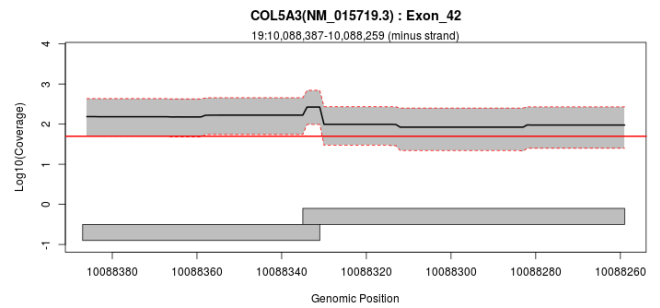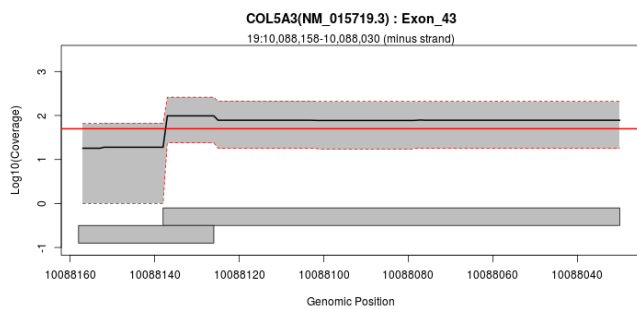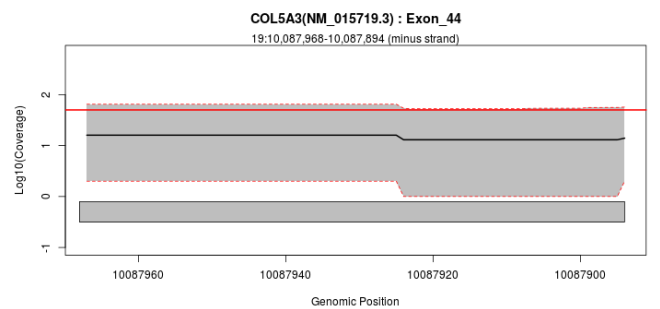



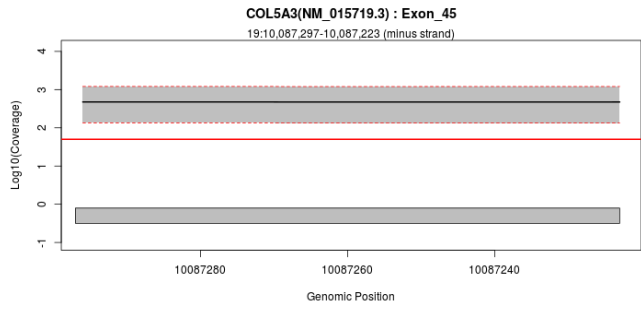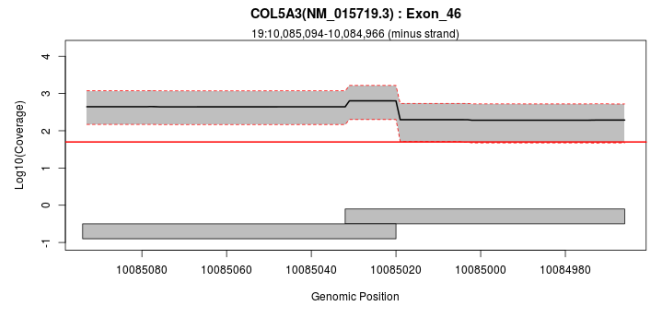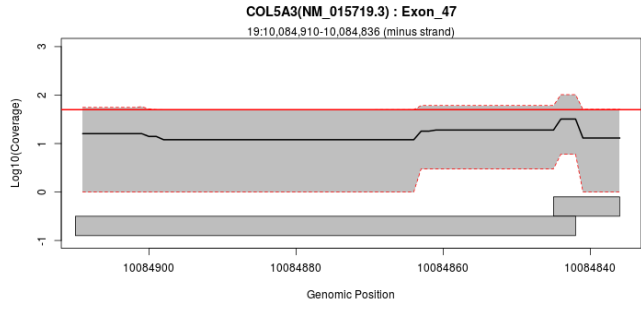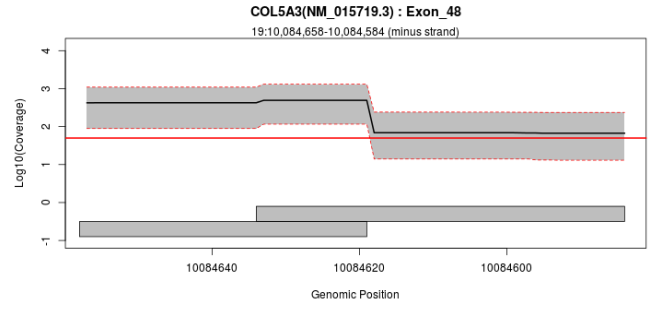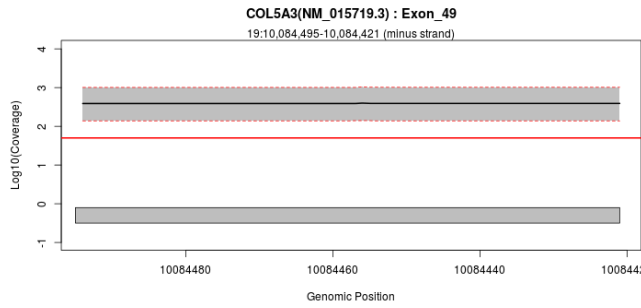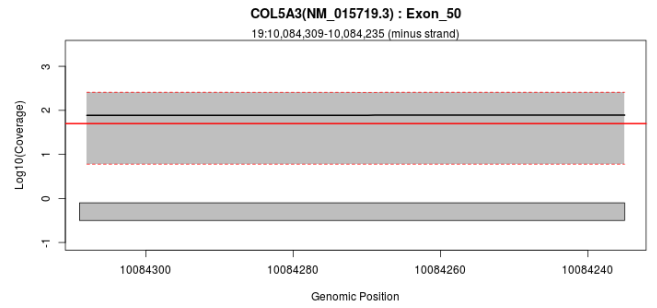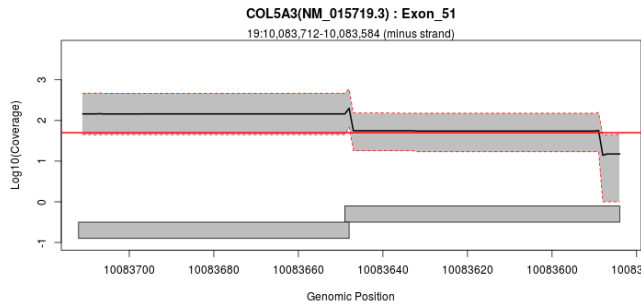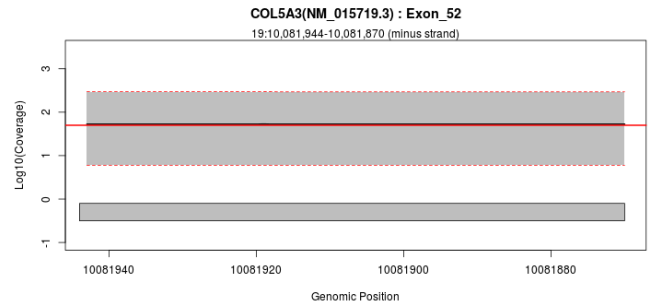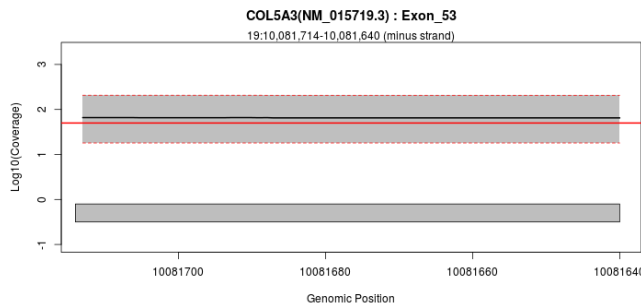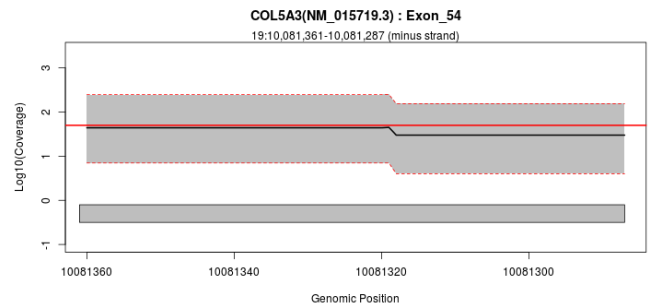

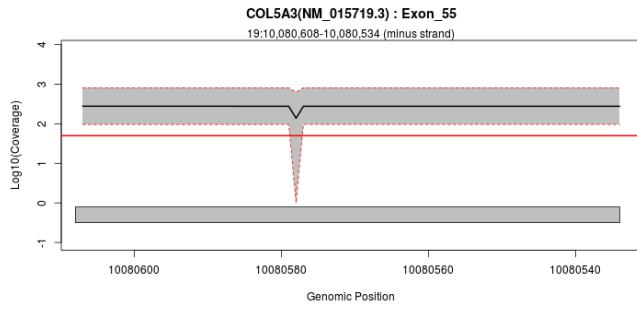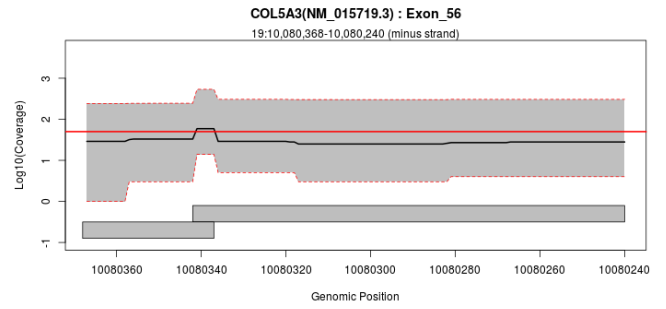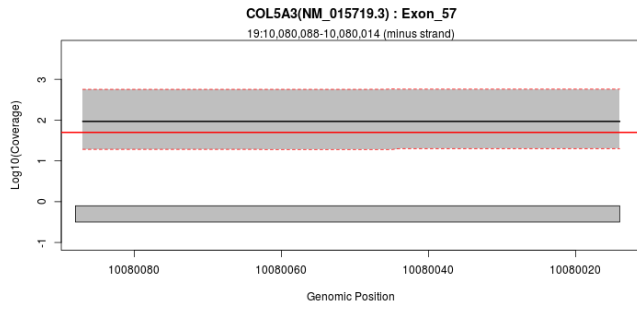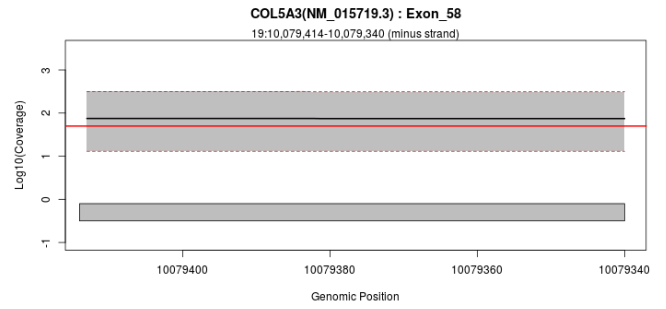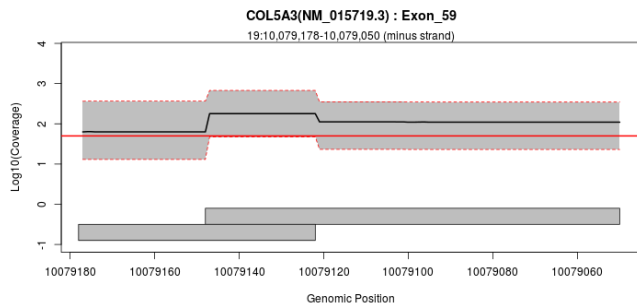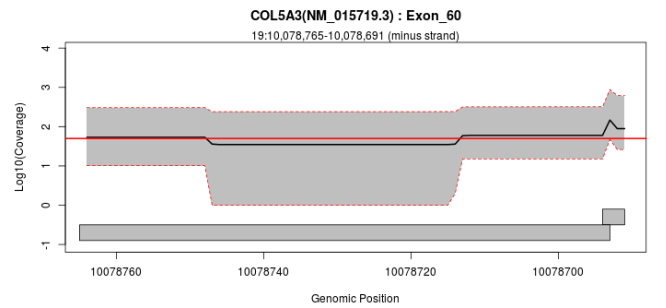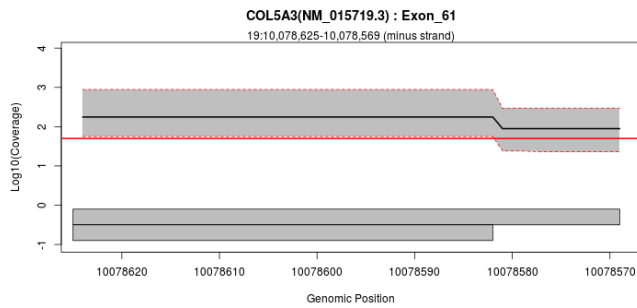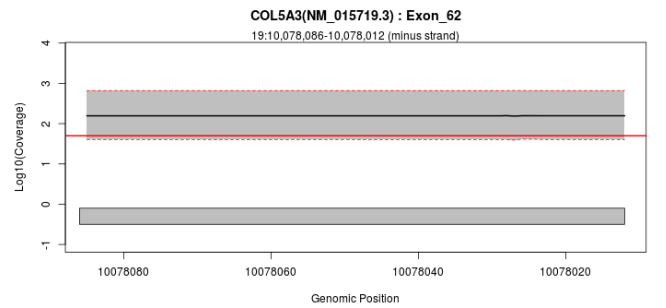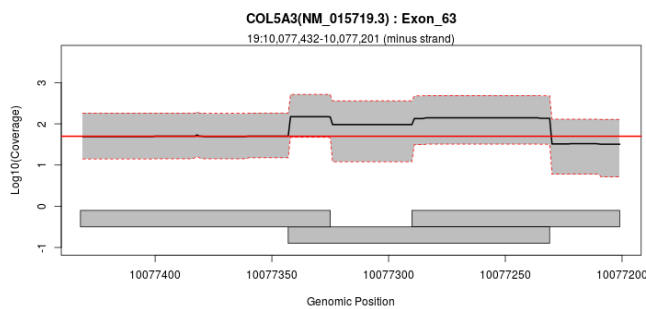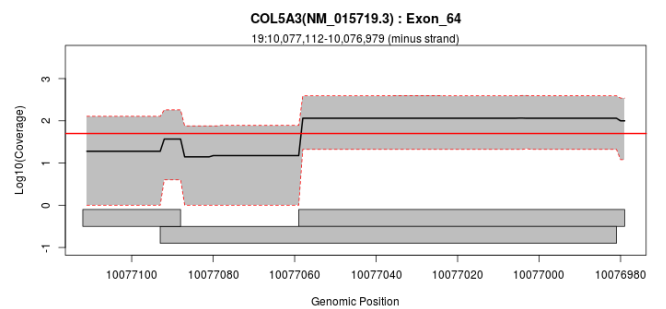

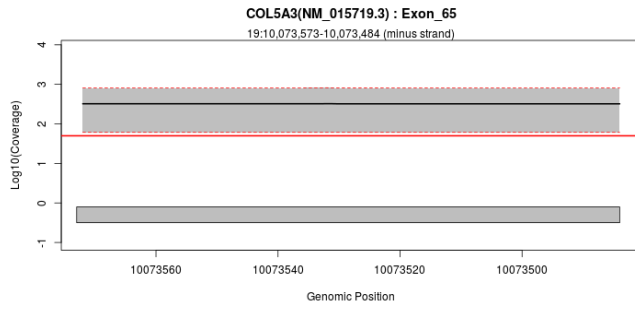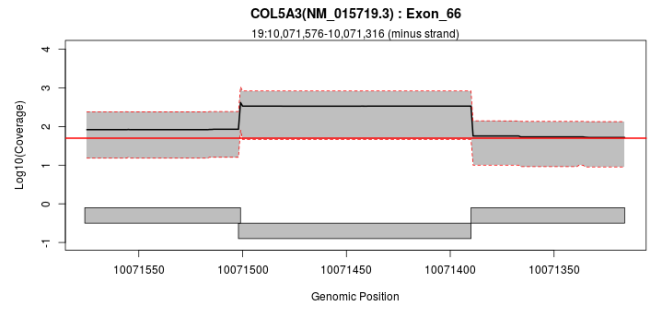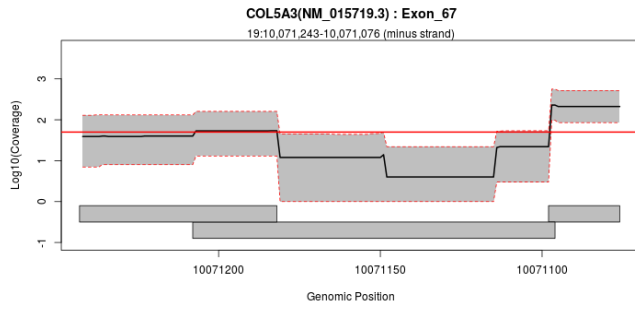

### Exon Overview: DCAF11 : NM\_001163484.1

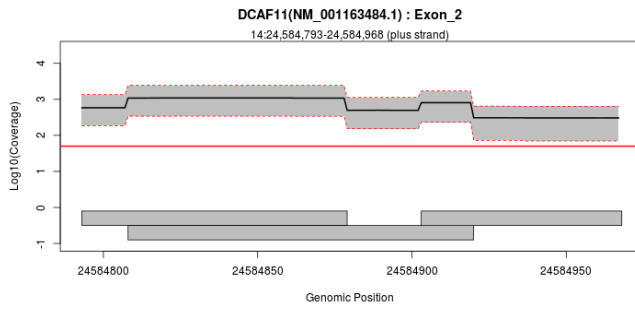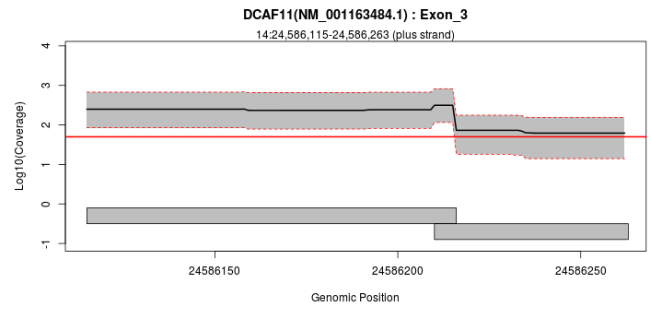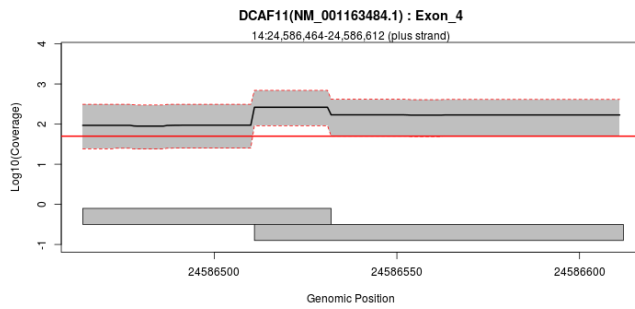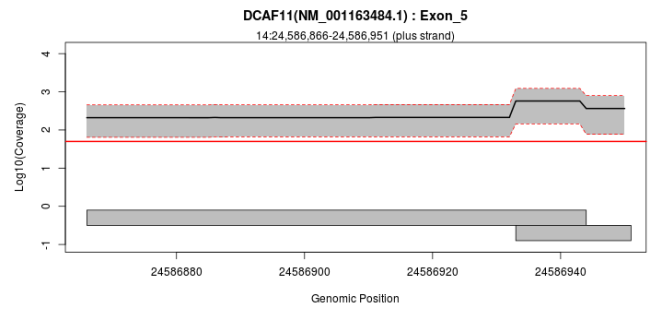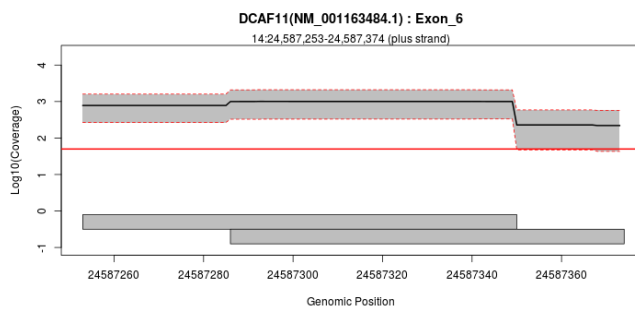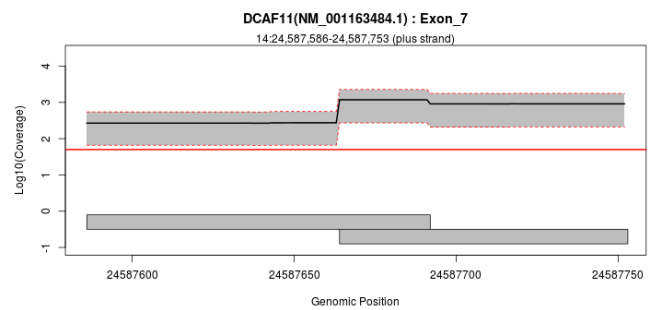

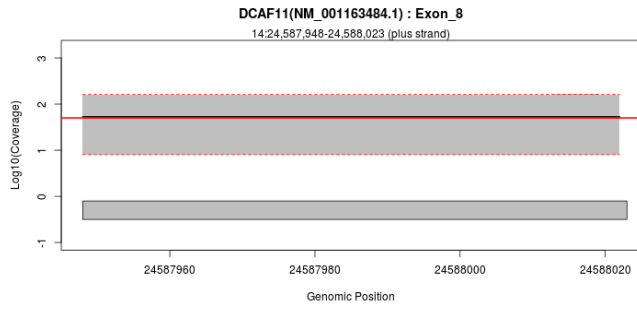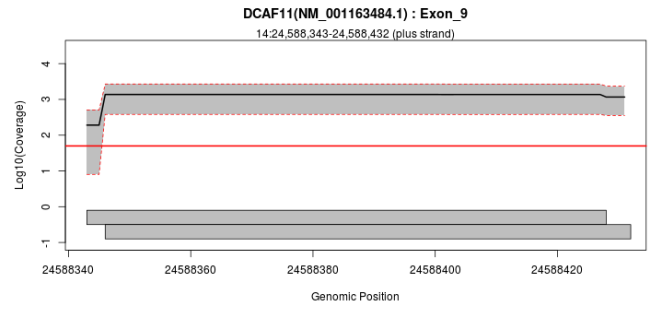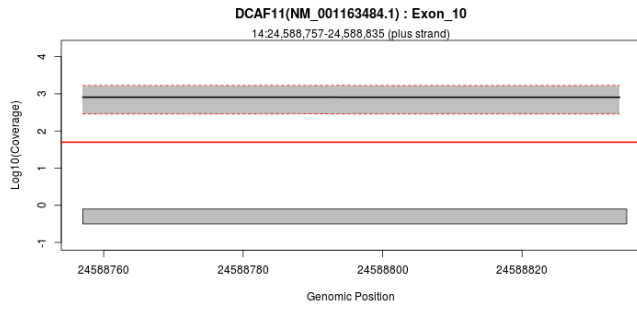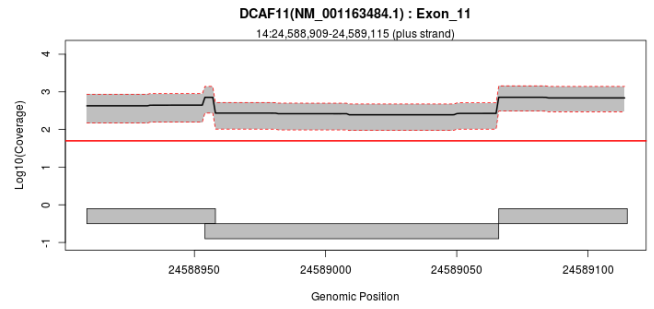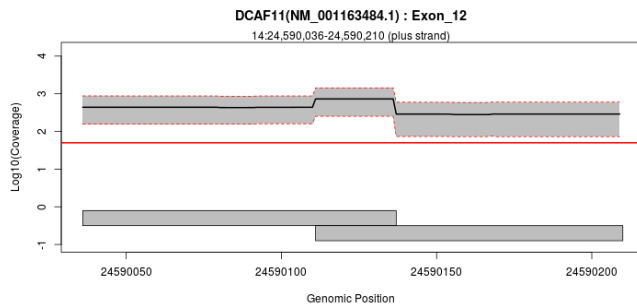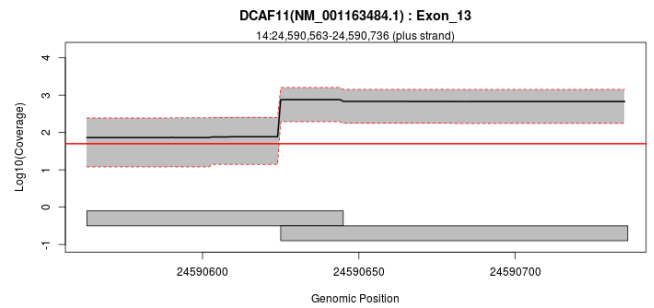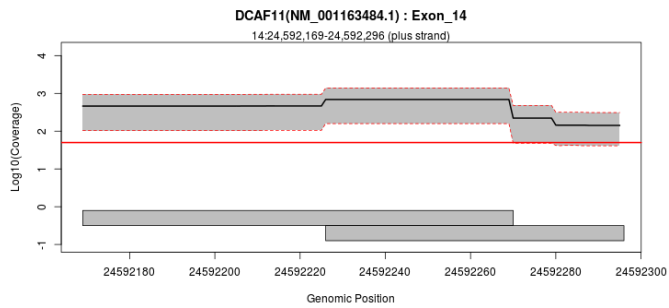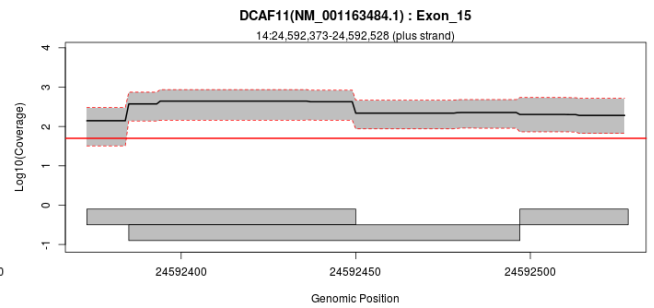

## Exon Overview: DCAF11 : NM\_025230.4

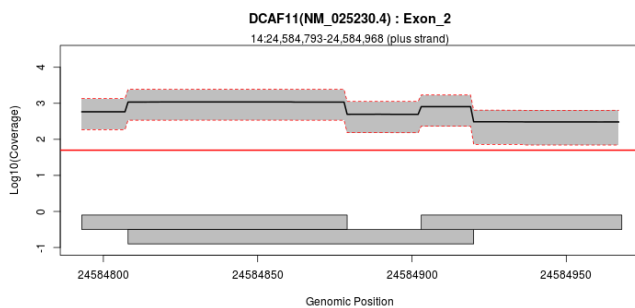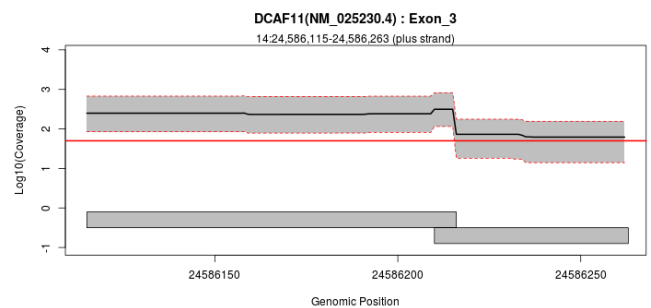

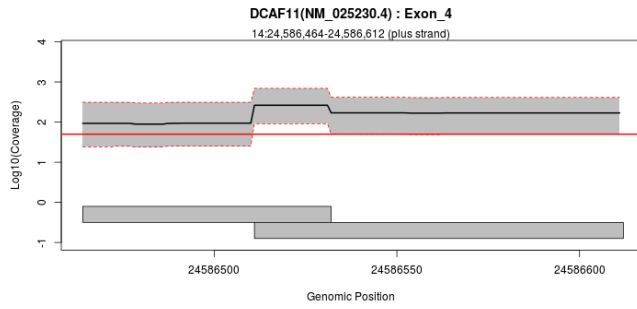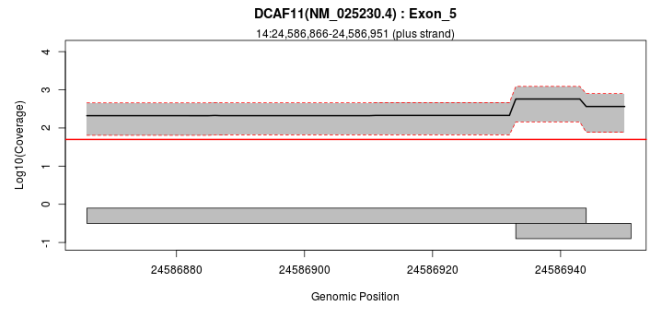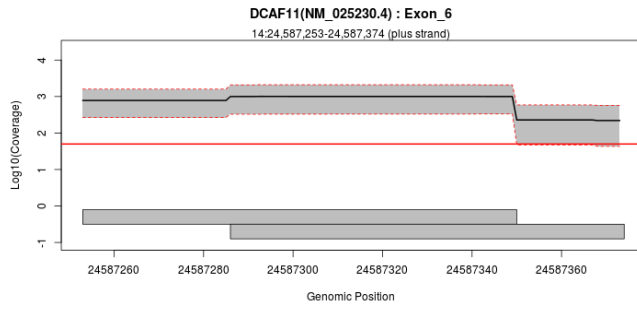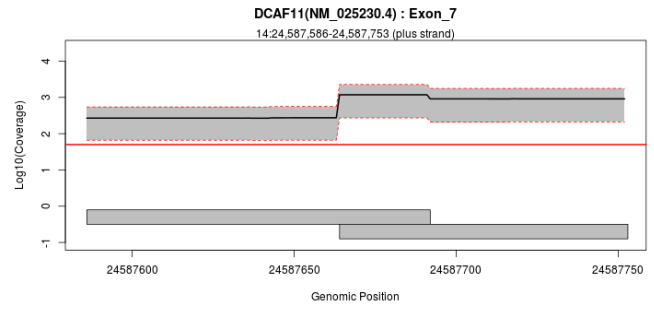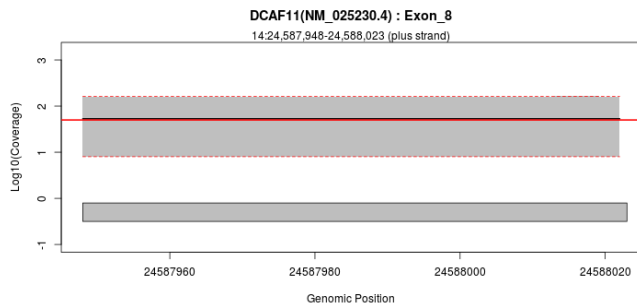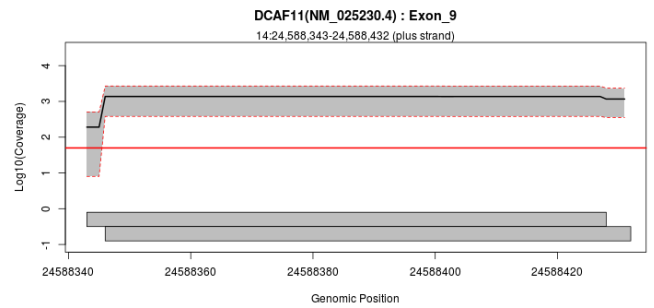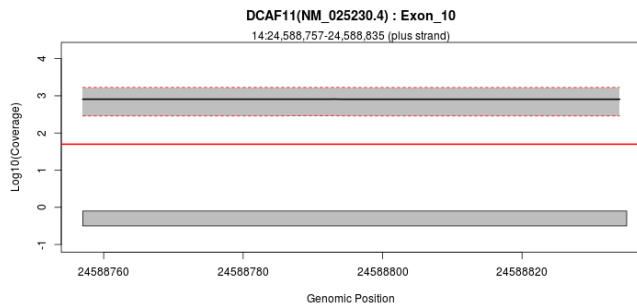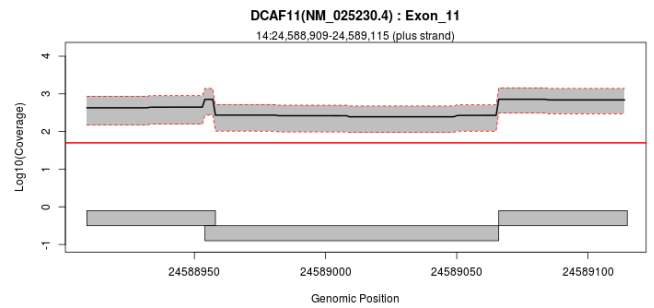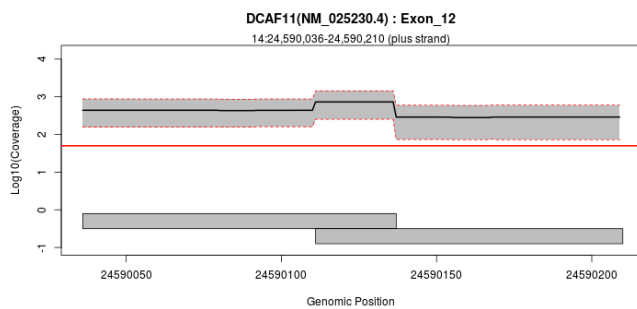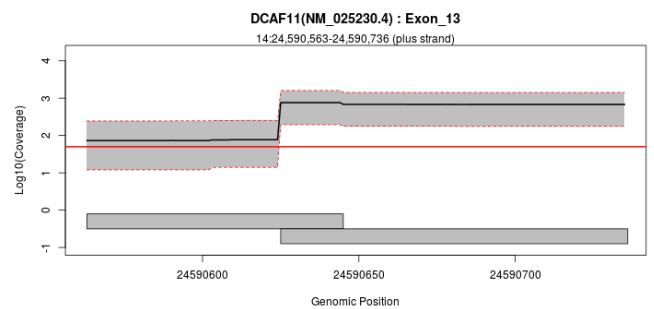

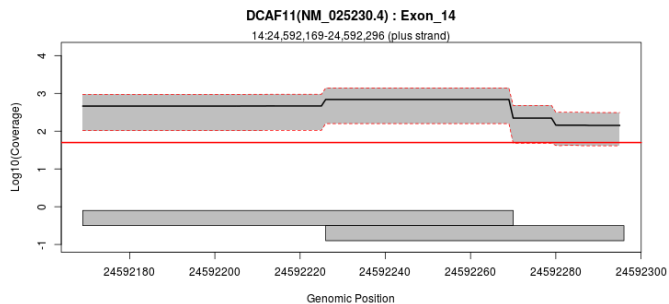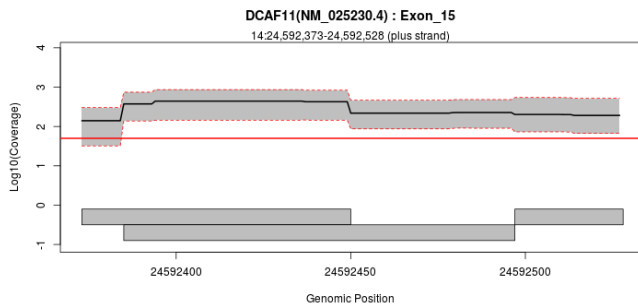

## Exon Overview: DCAF11 : NM\_181357.2

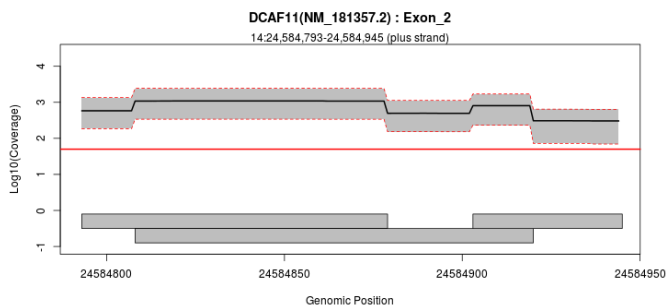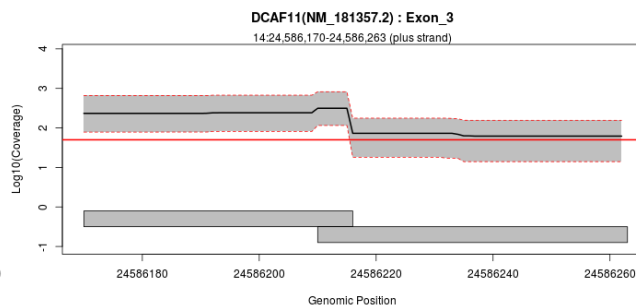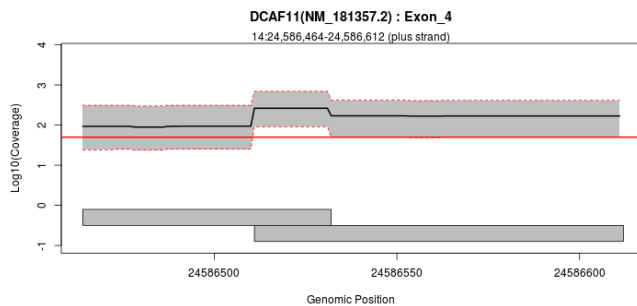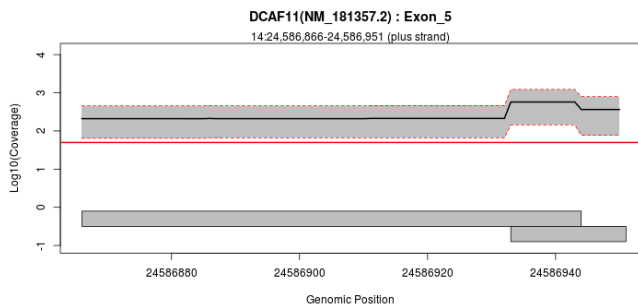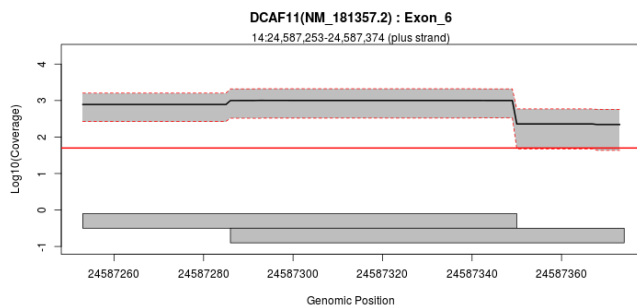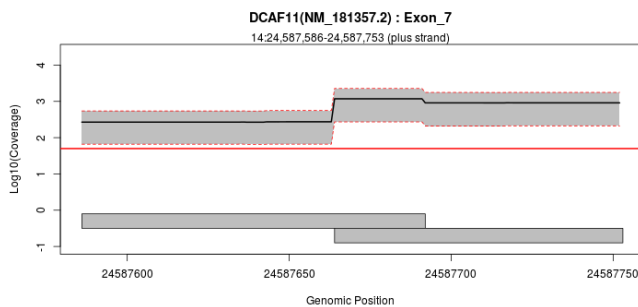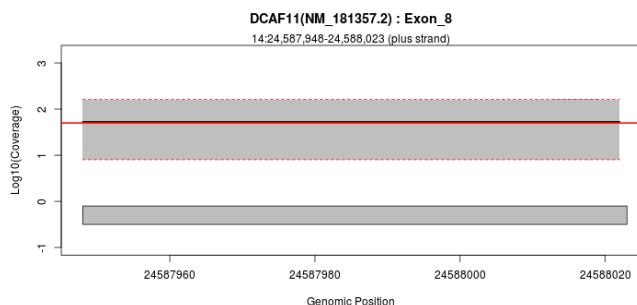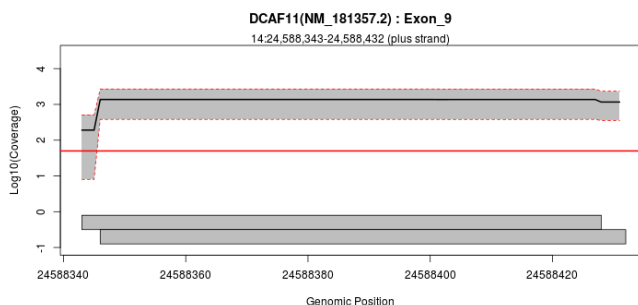

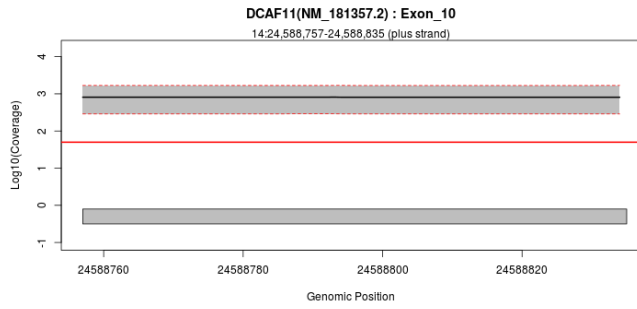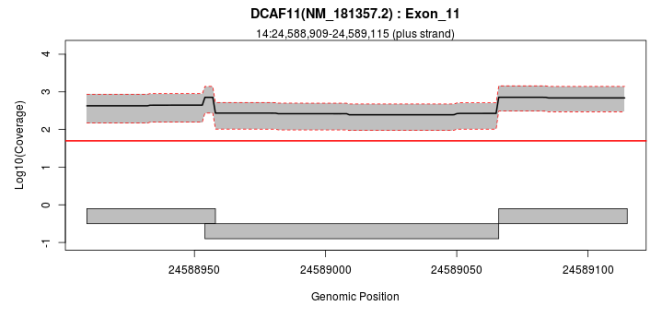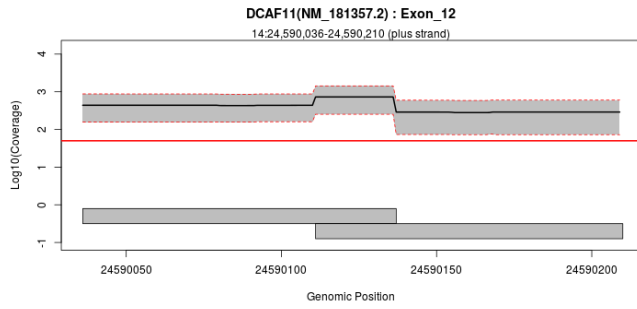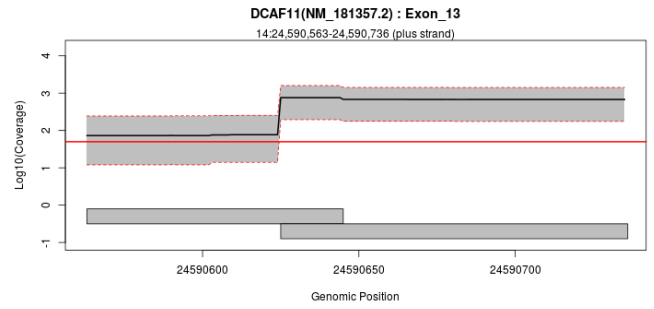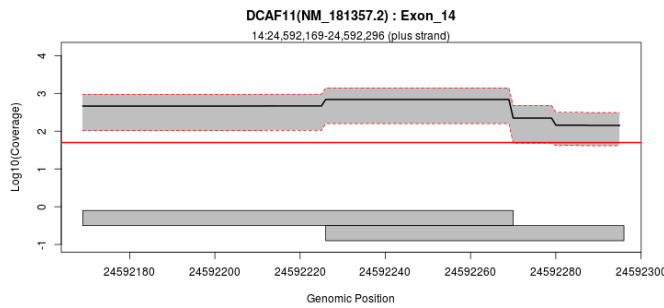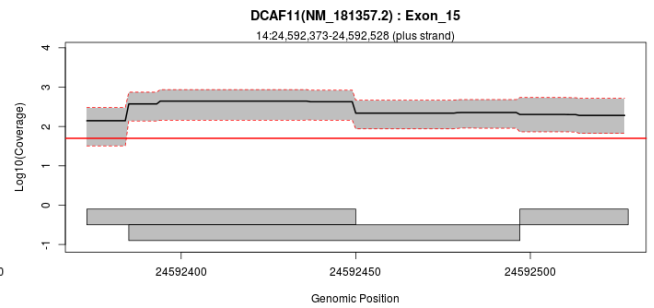

## Exon Overview: DOCK1 : NM\_001290223.1

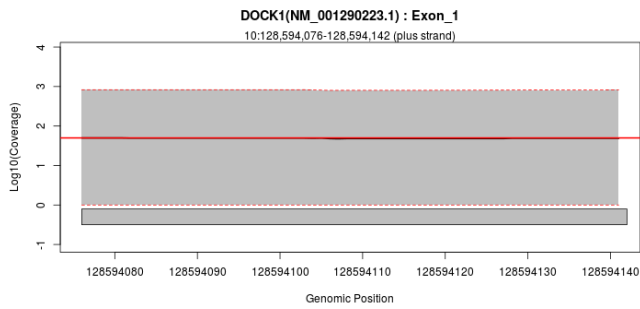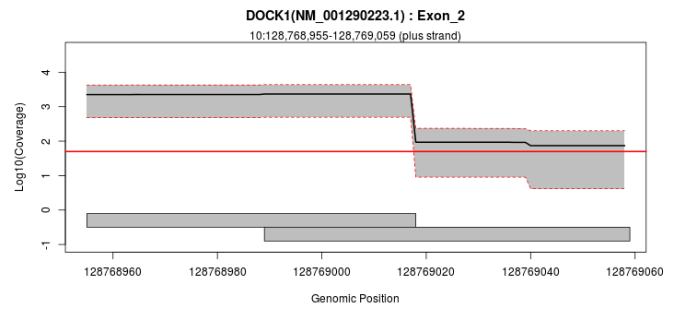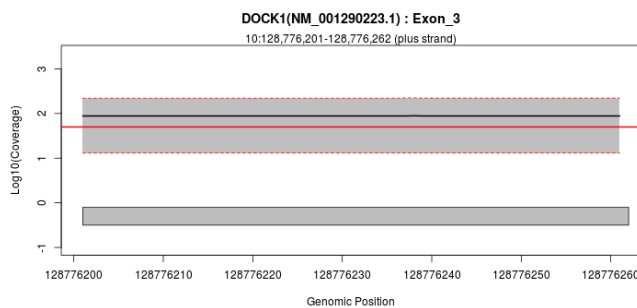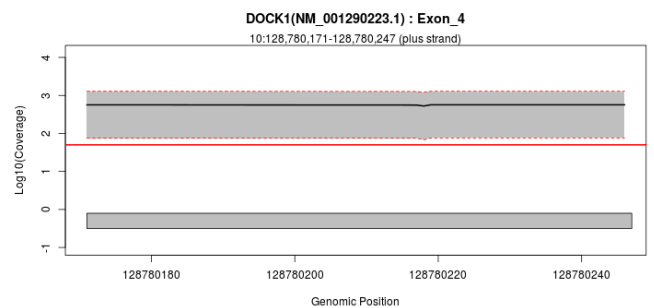

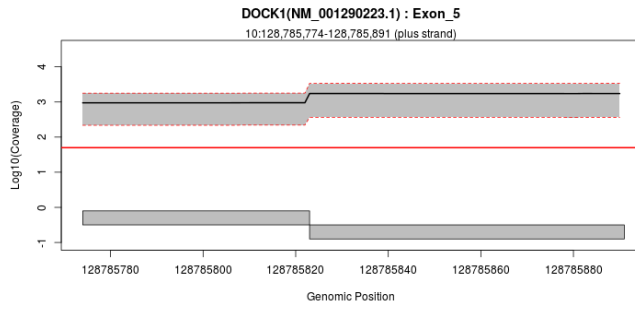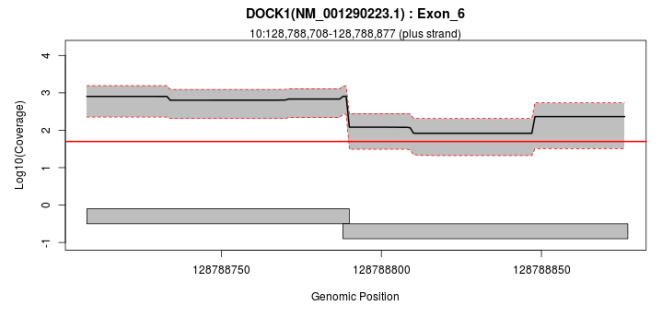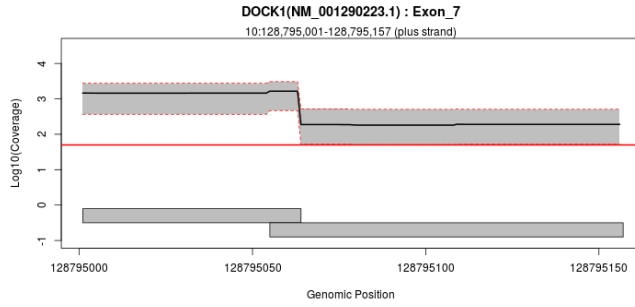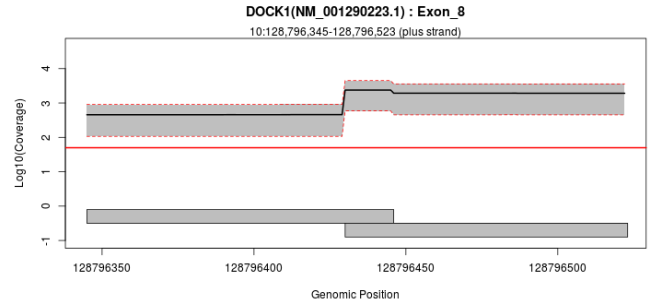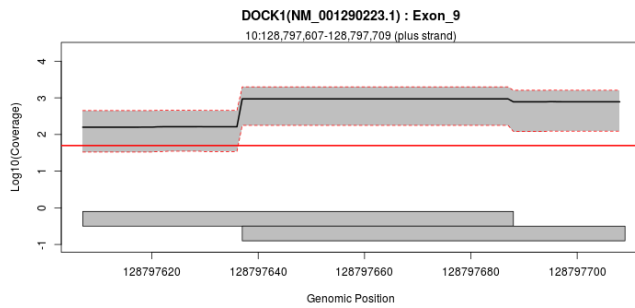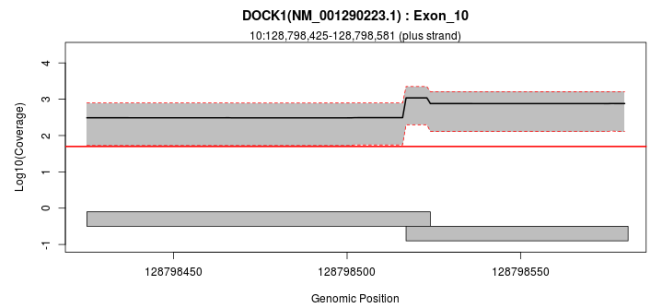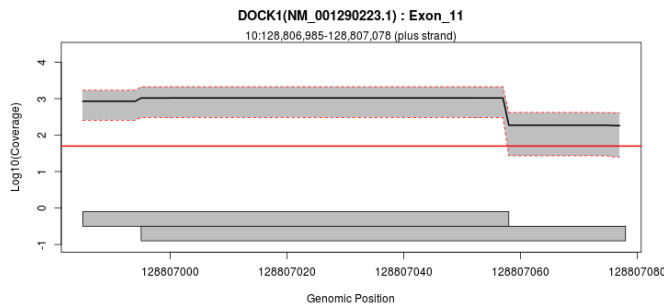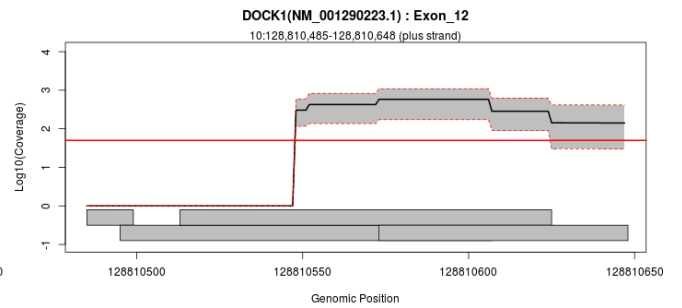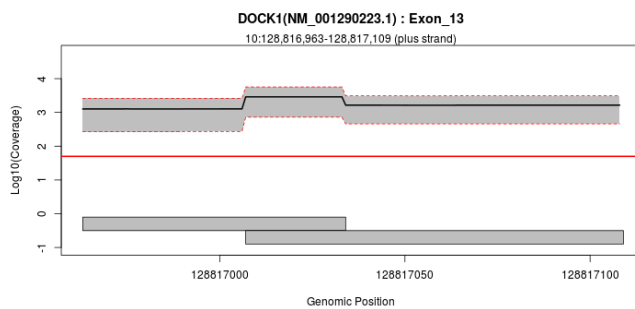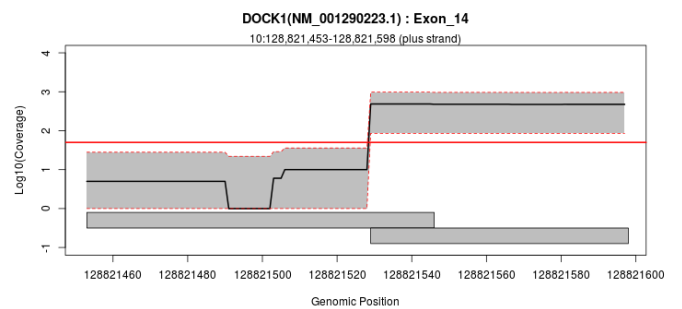



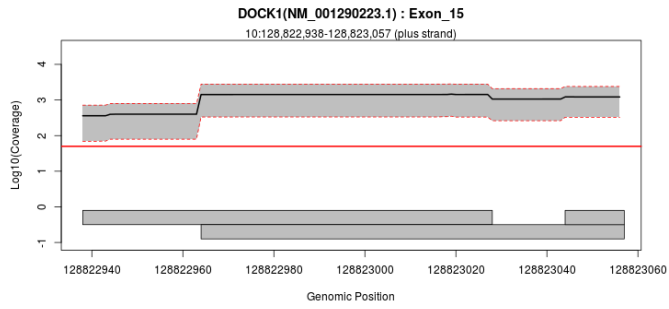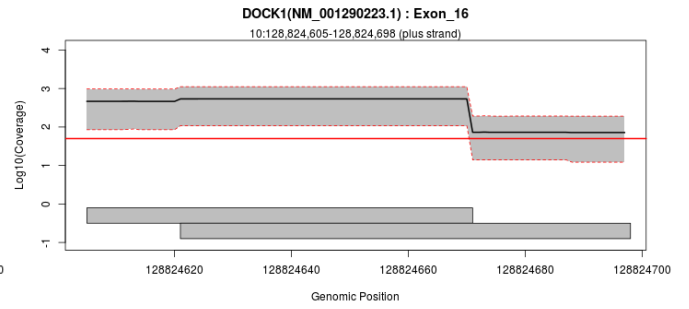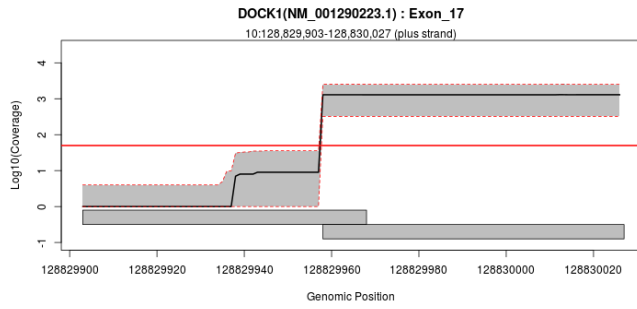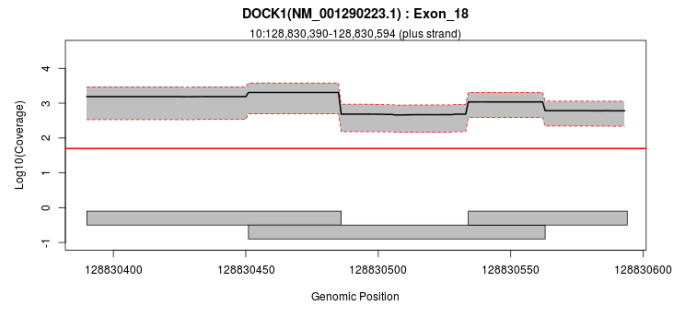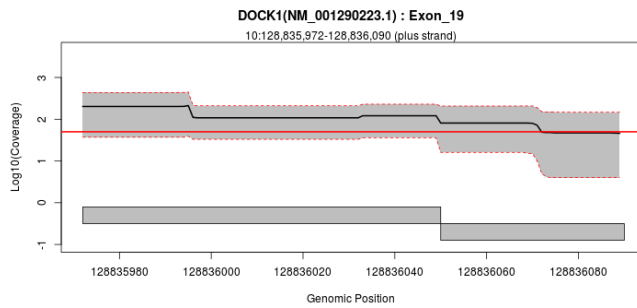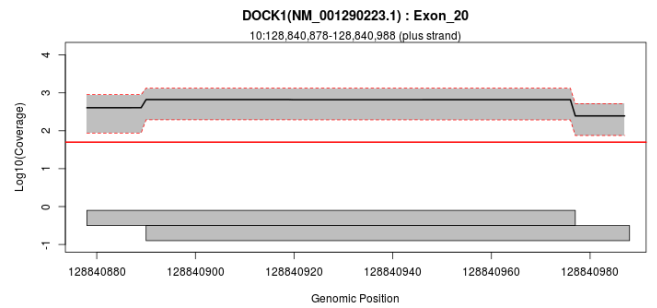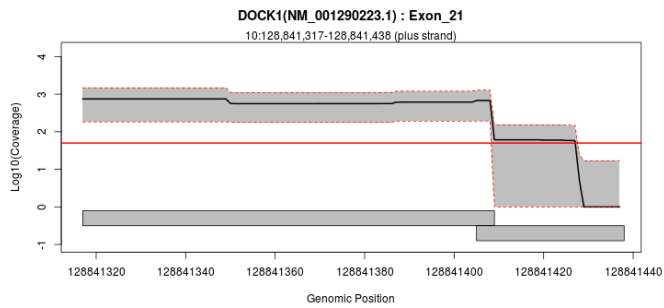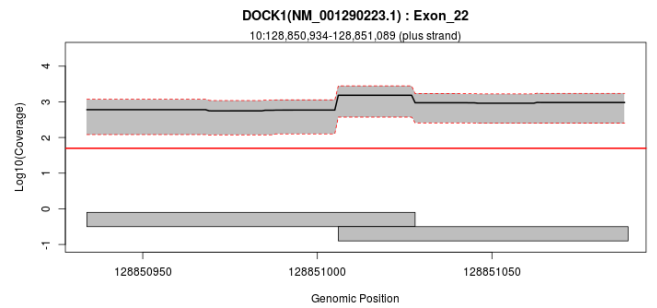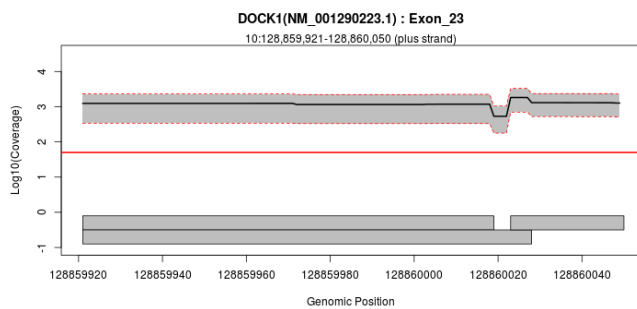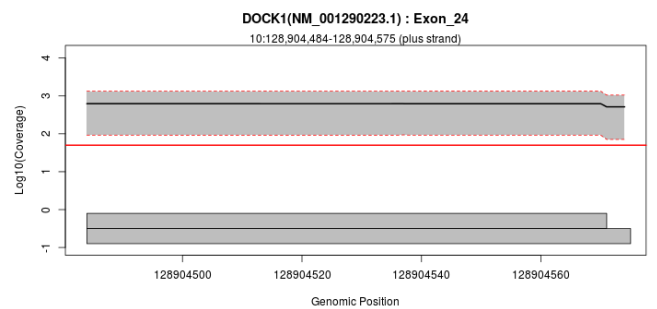

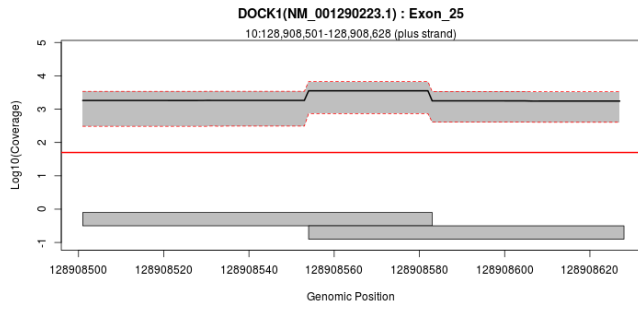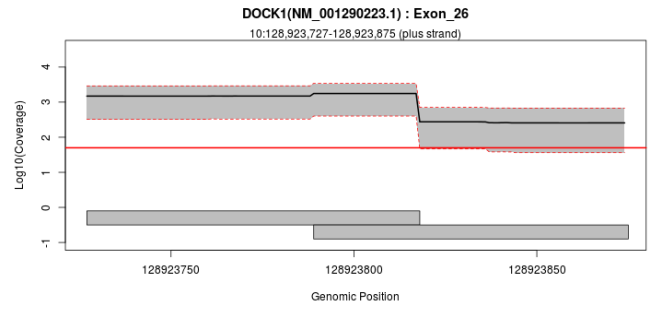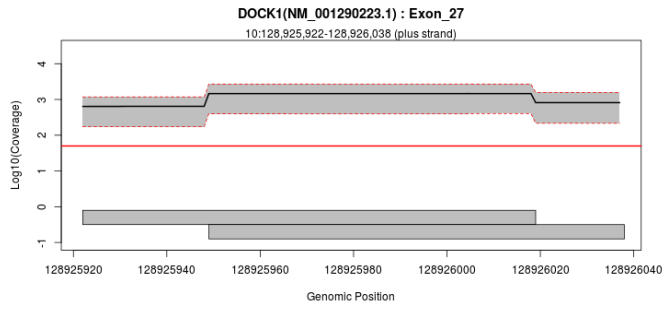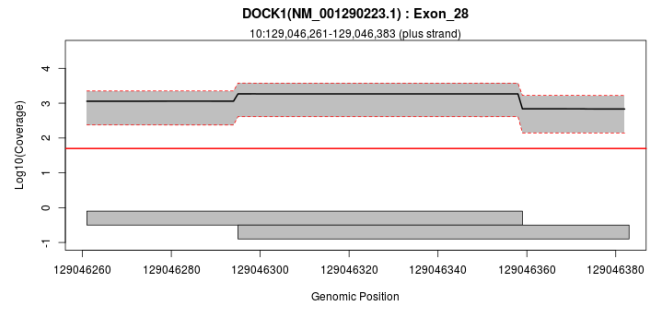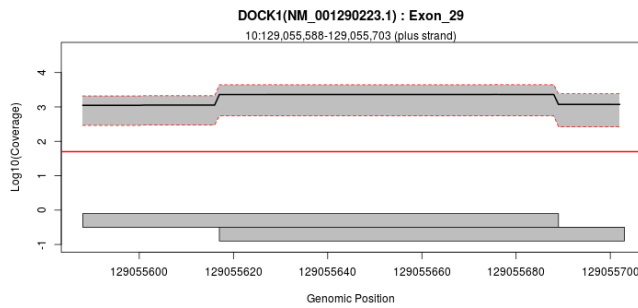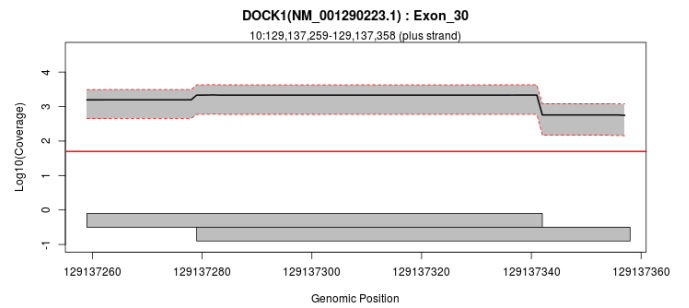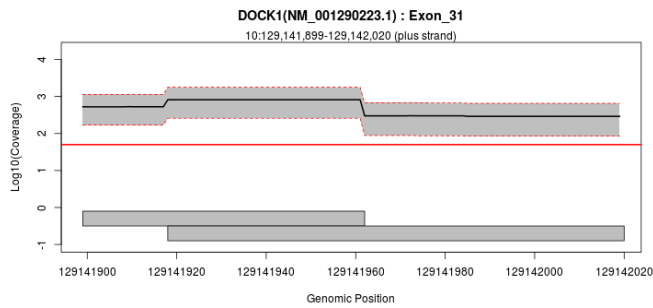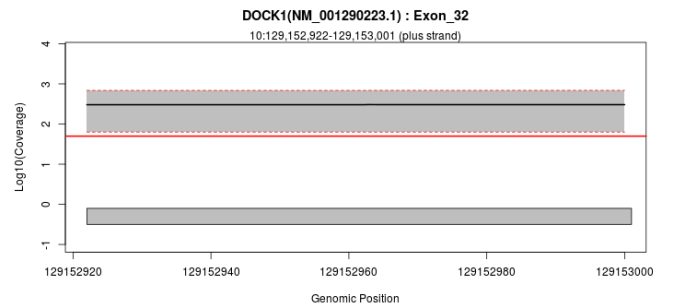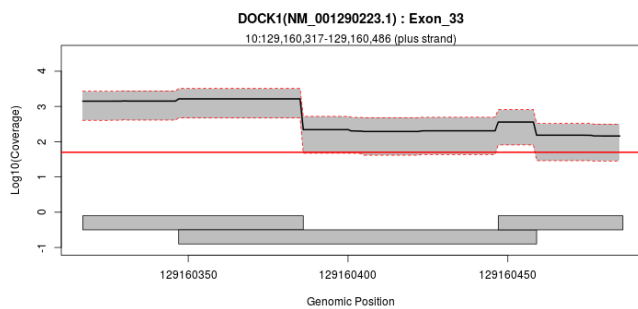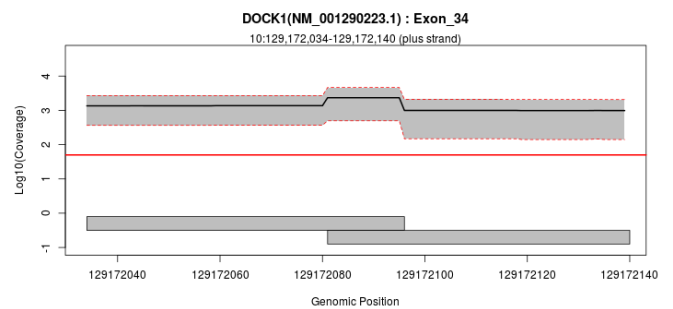

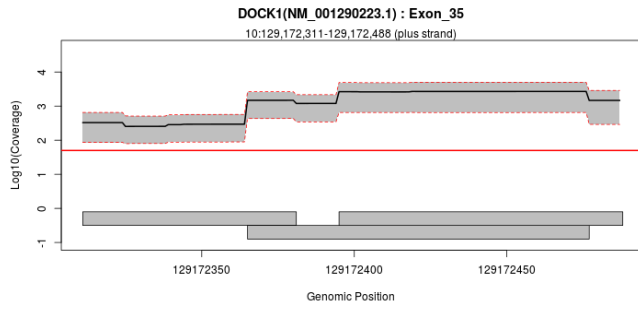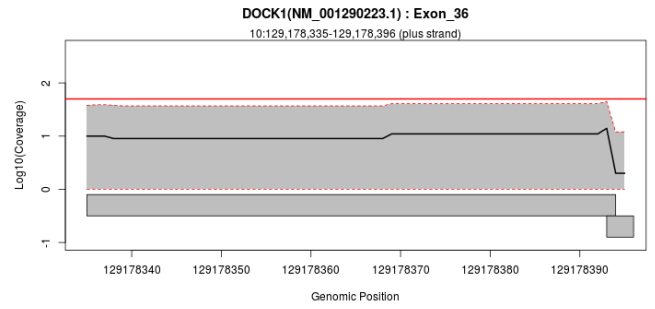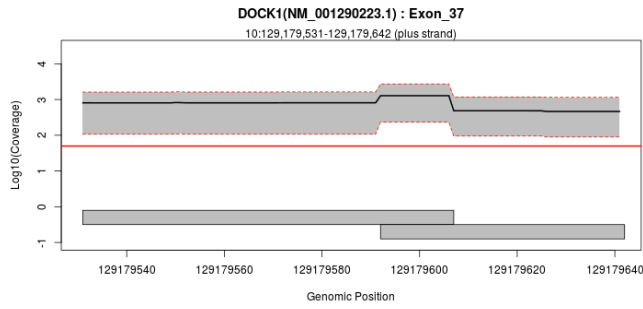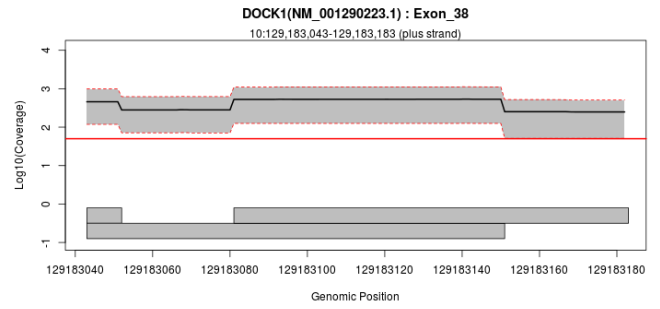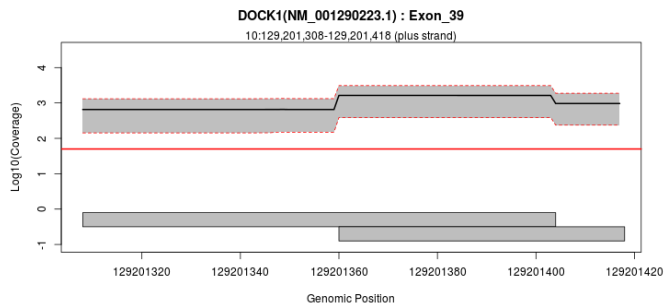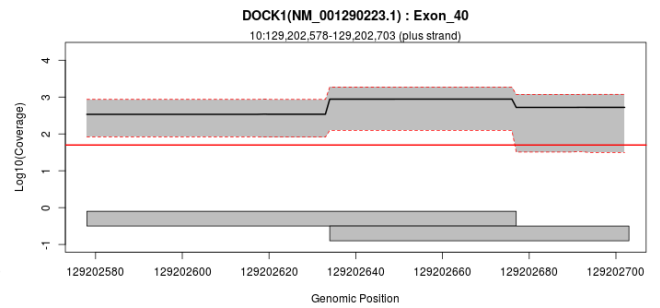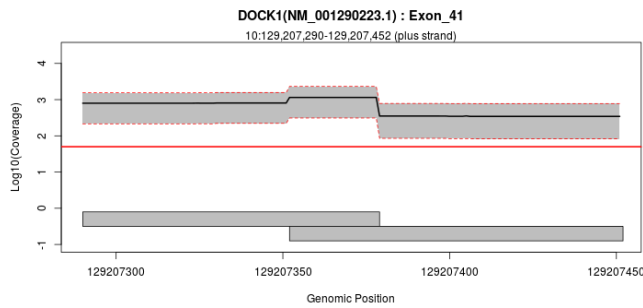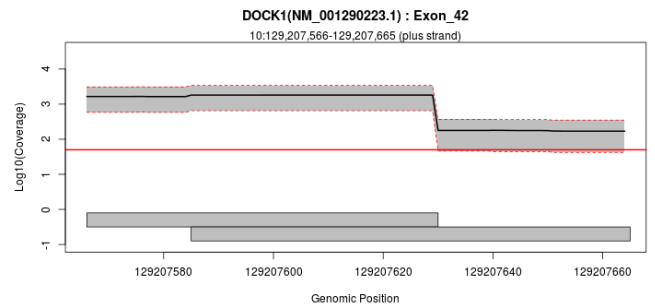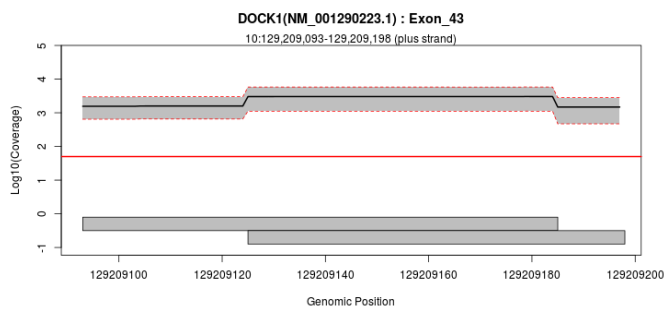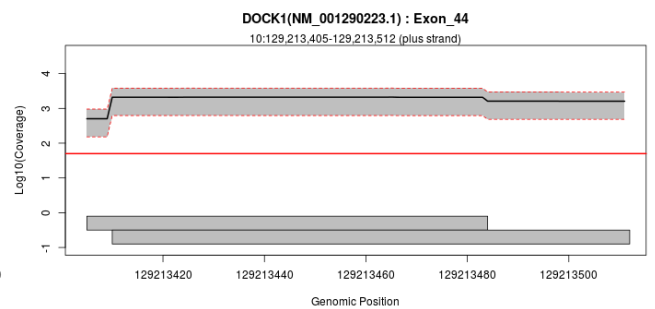

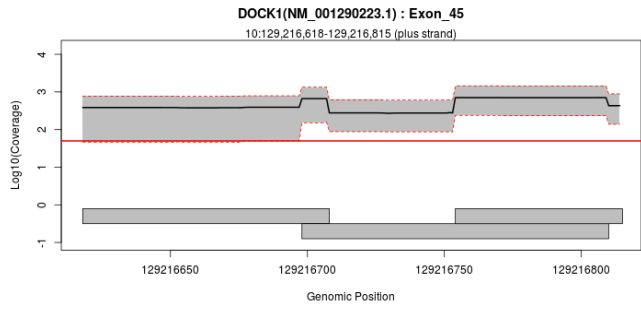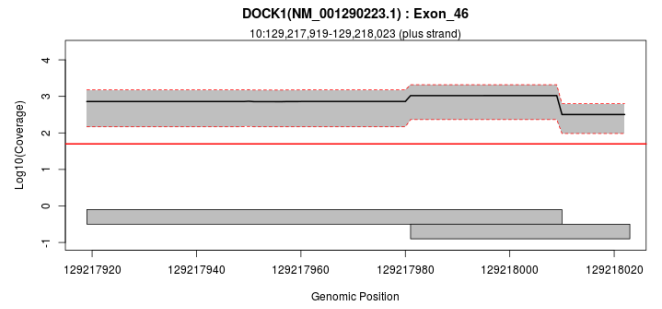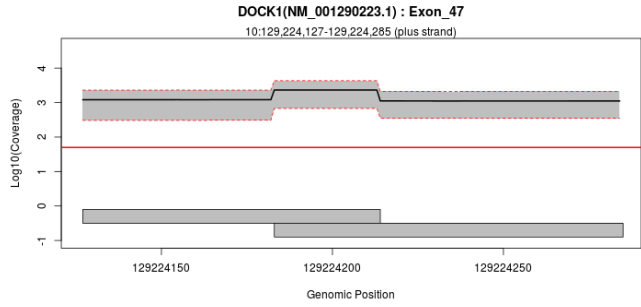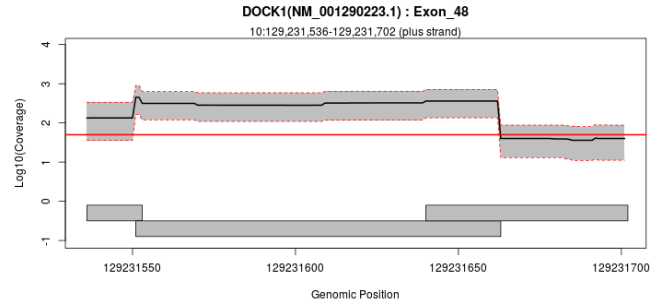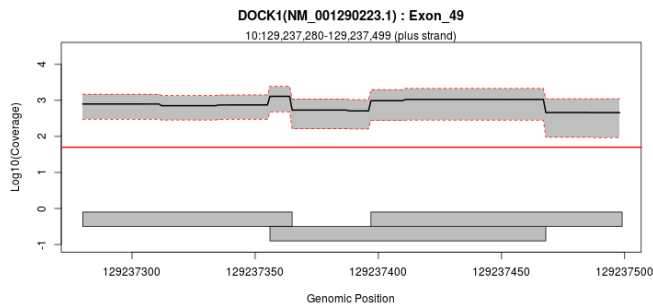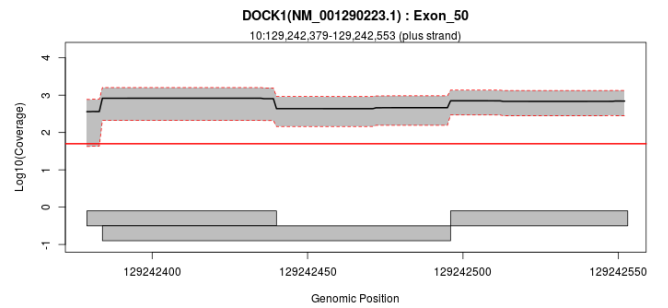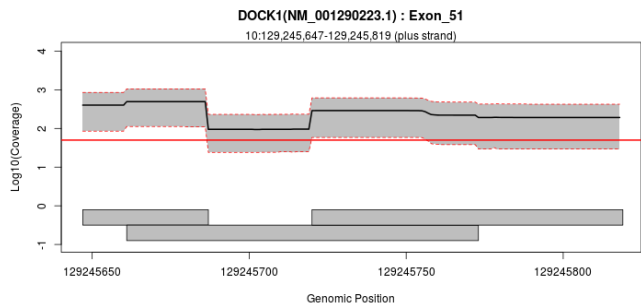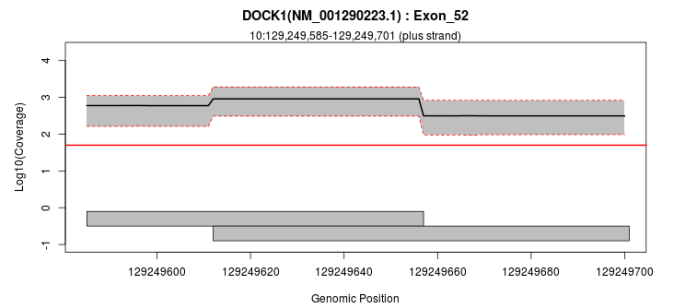

## Exon Overview: DOCK1 : NM\_001380.4

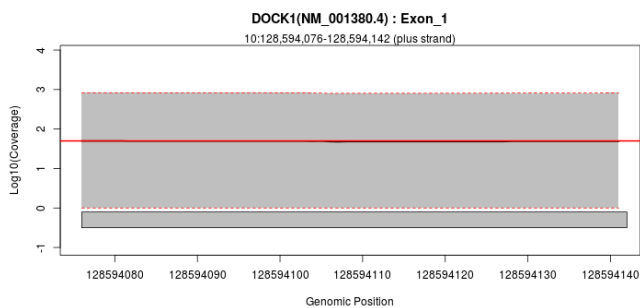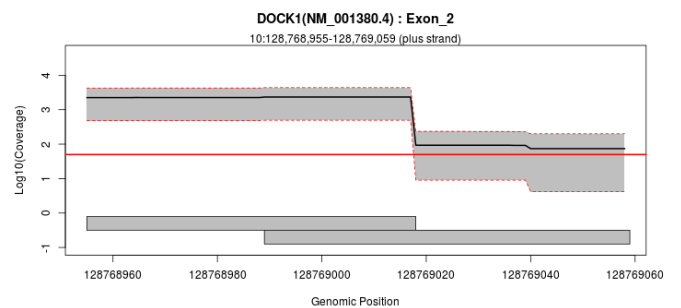

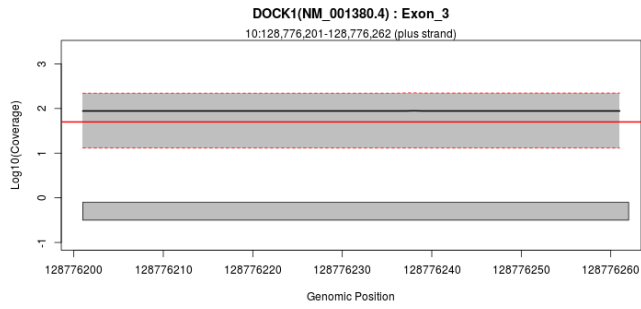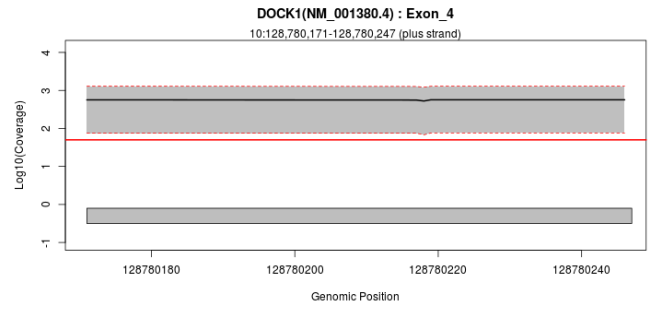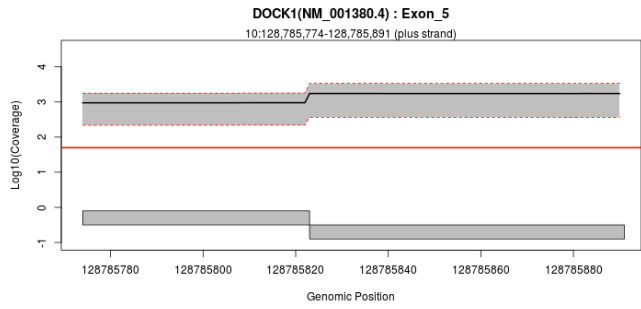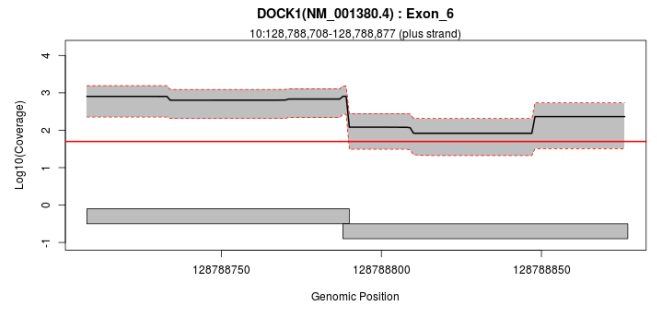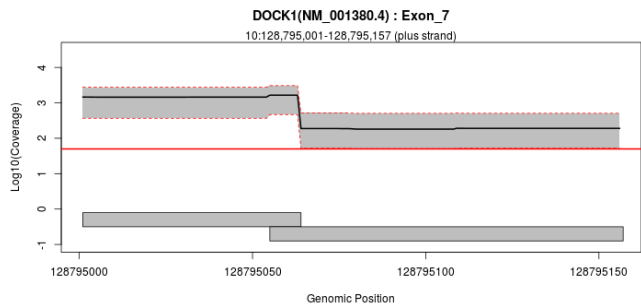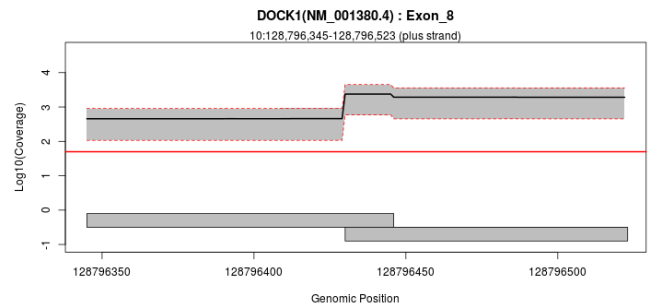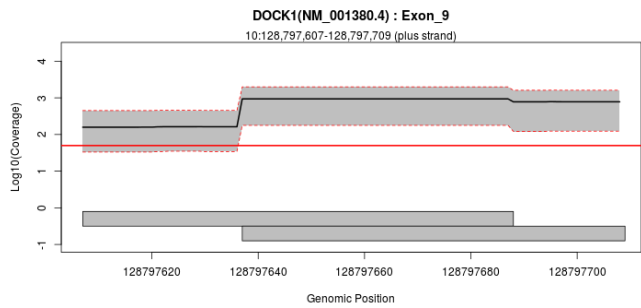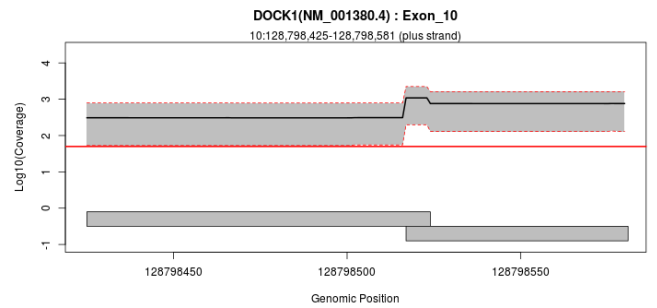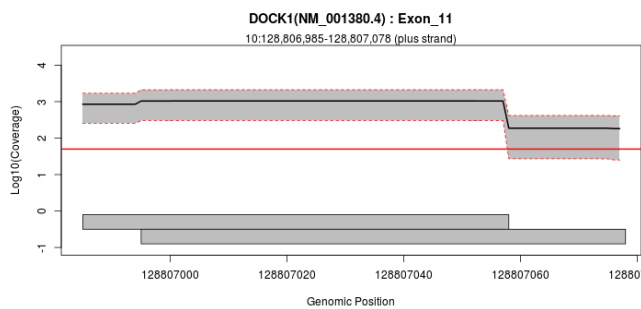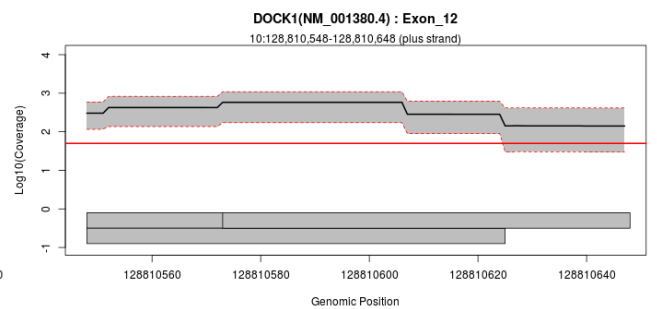

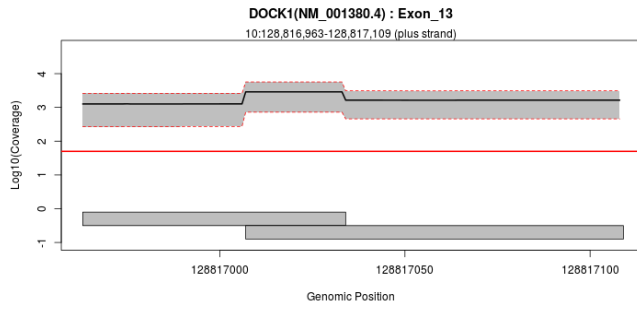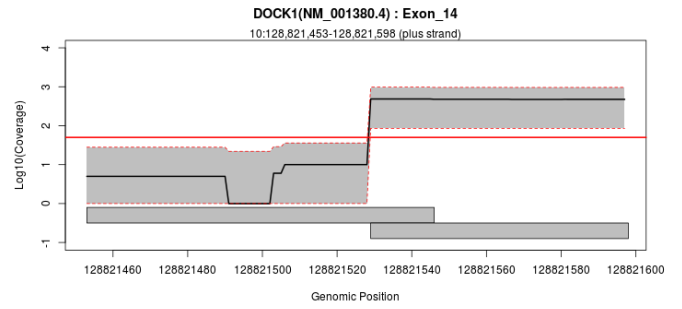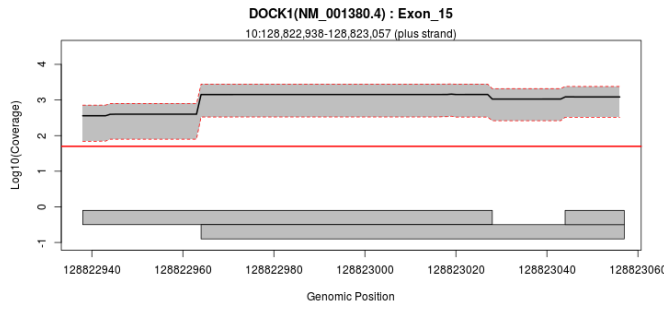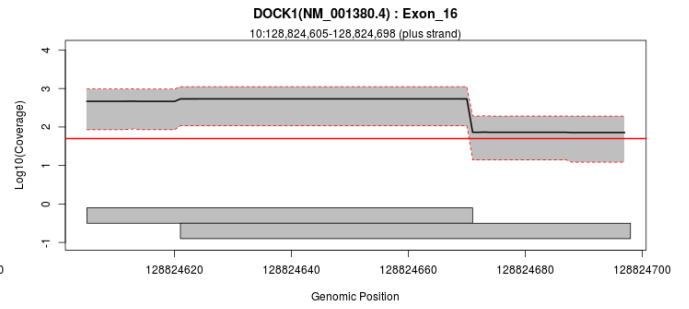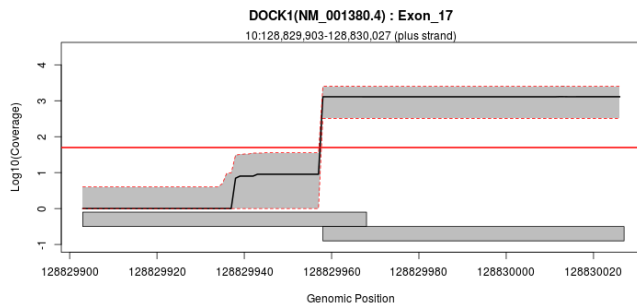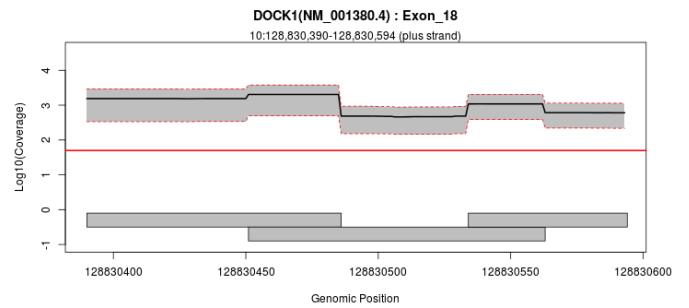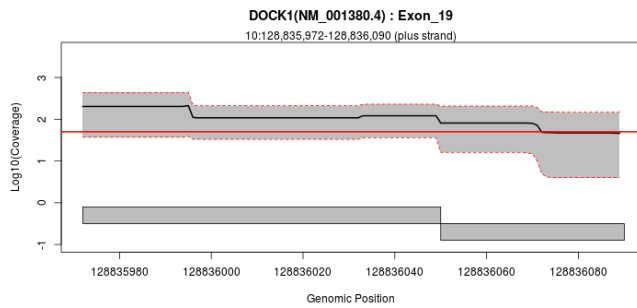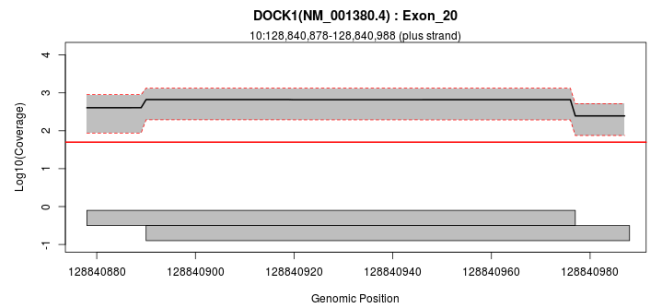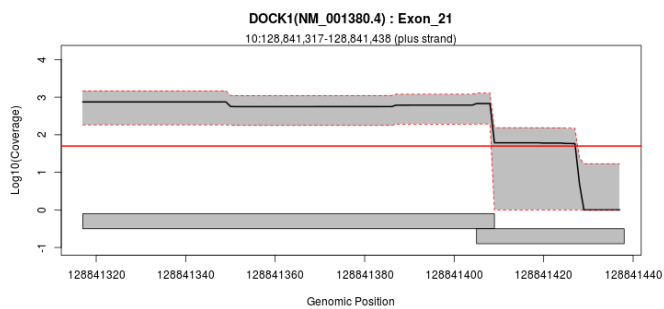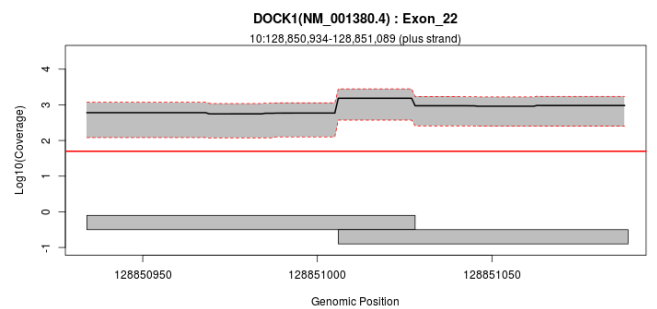

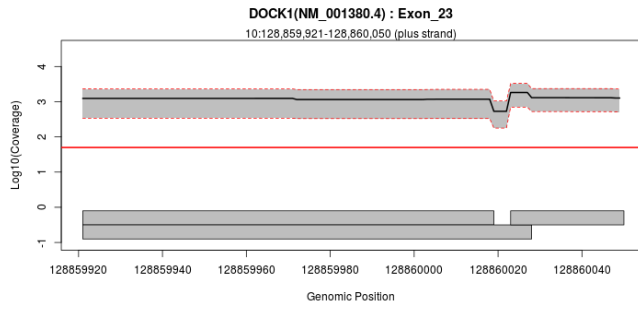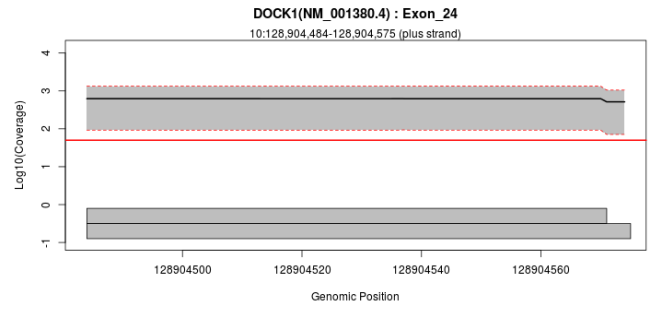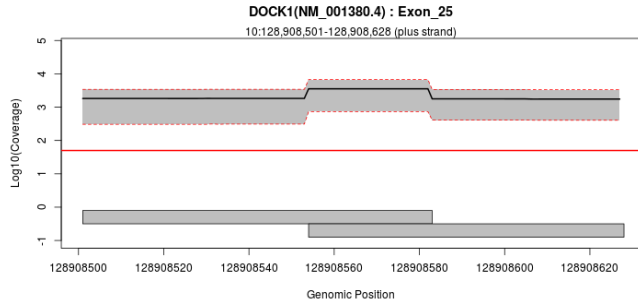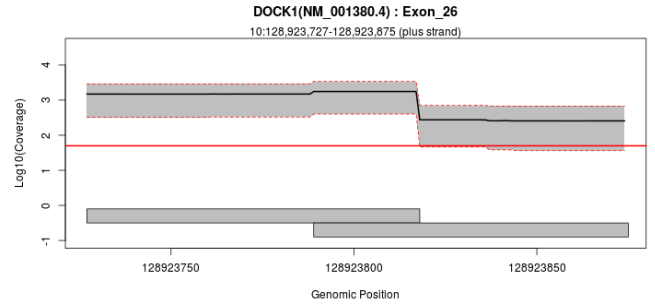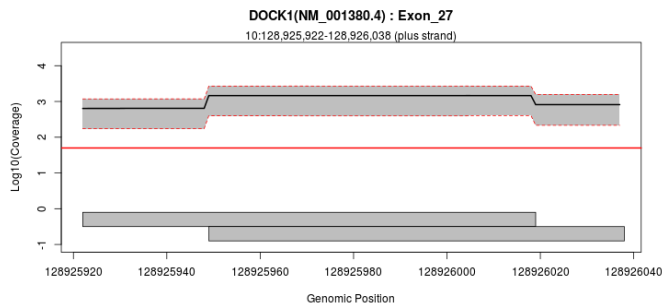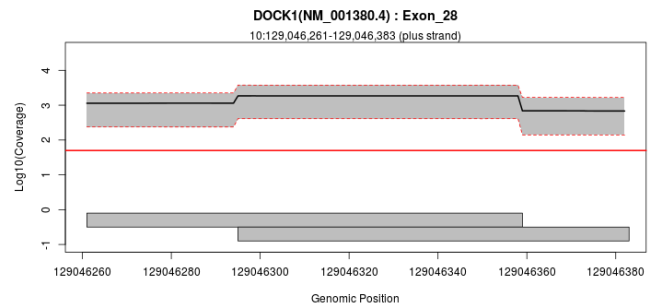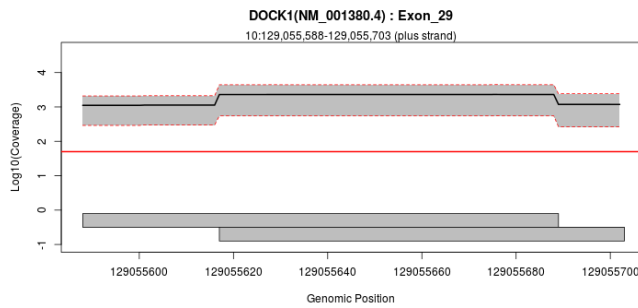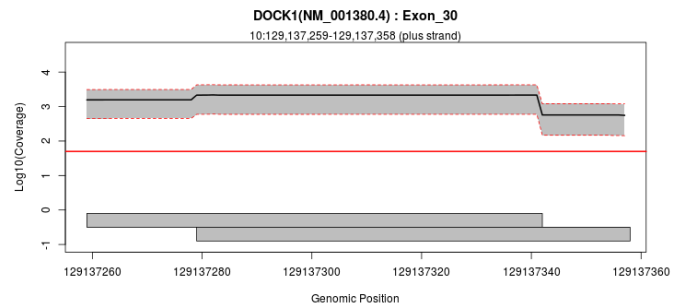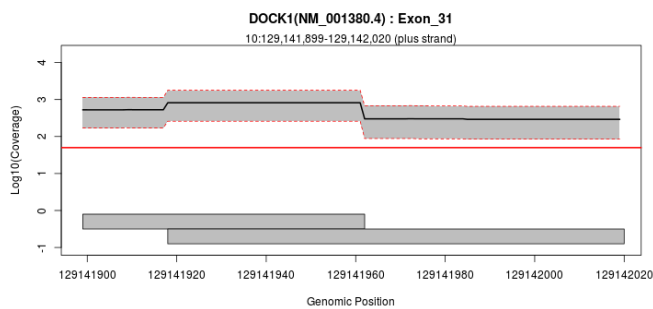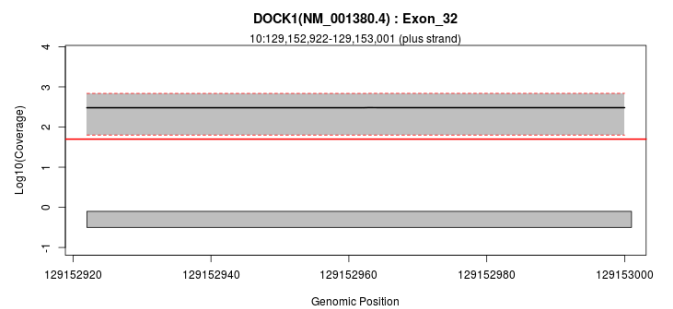

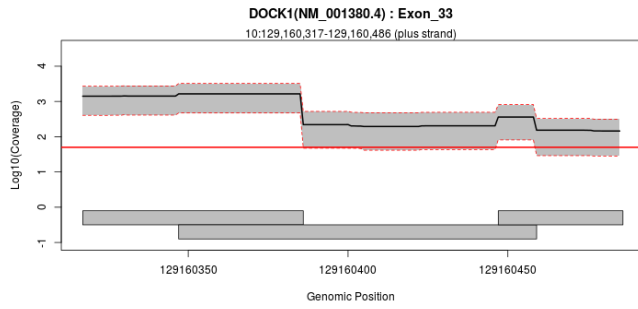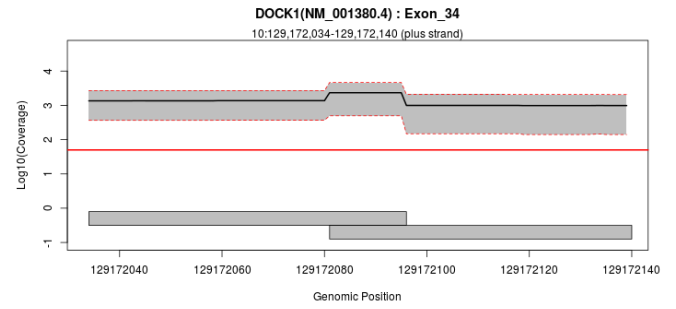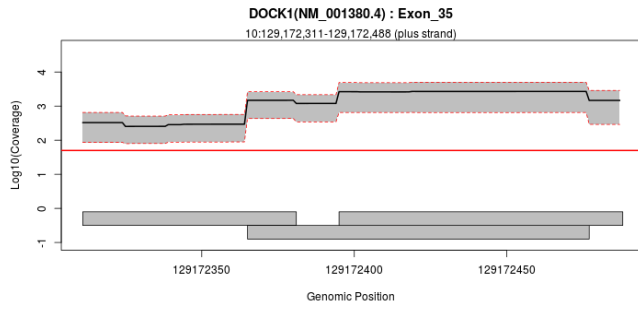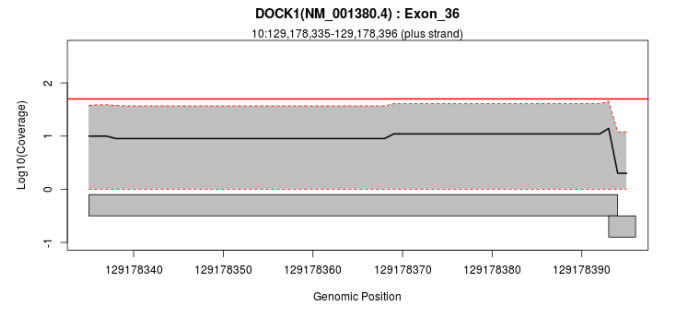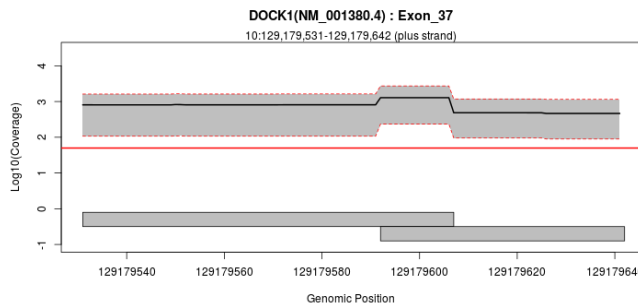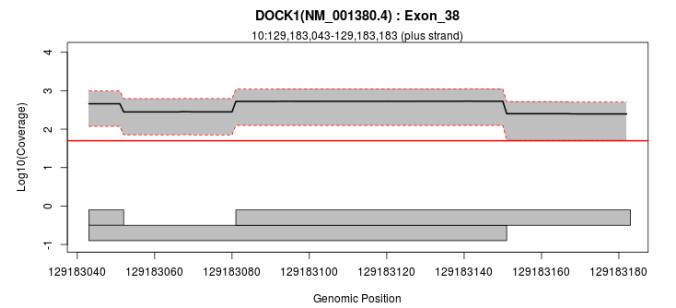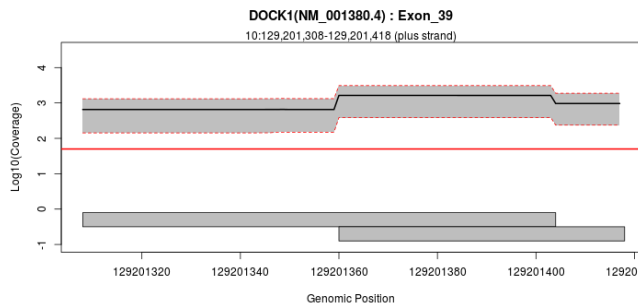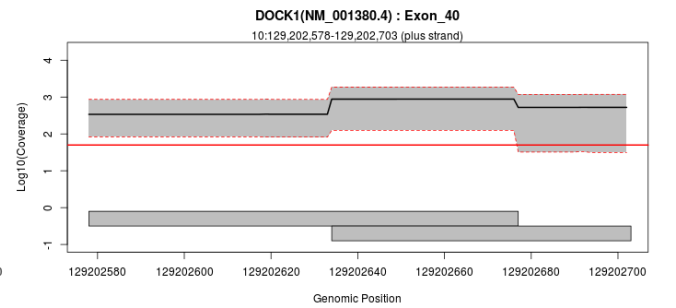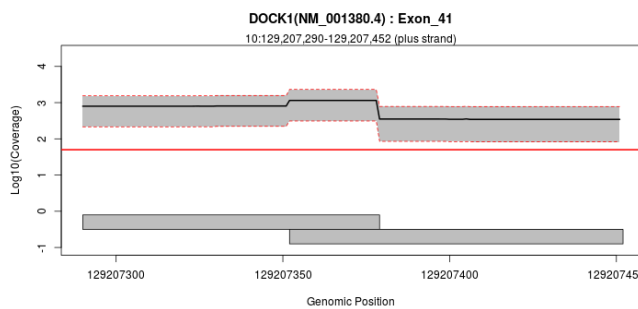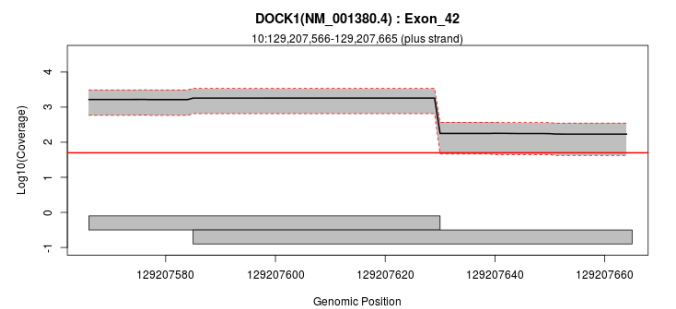



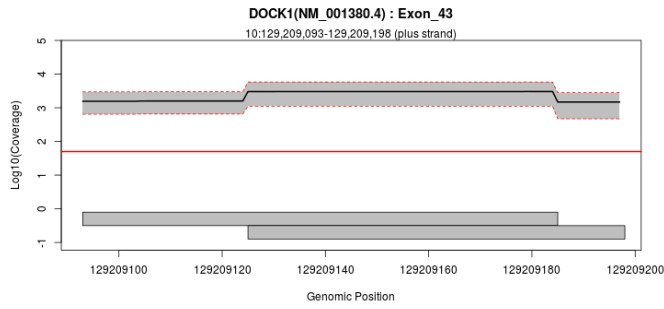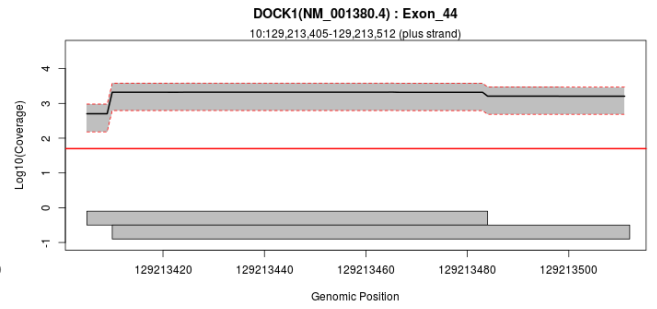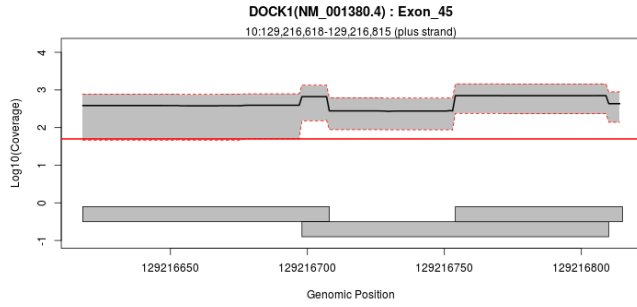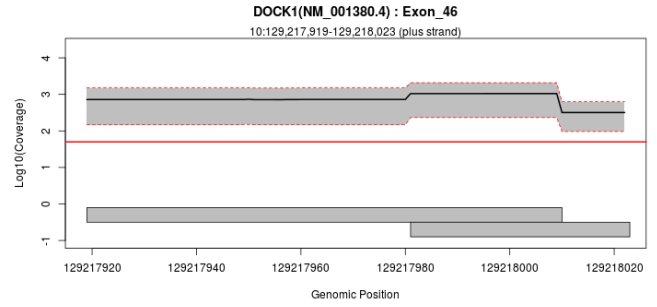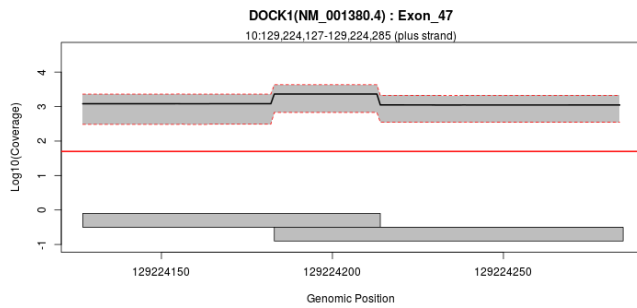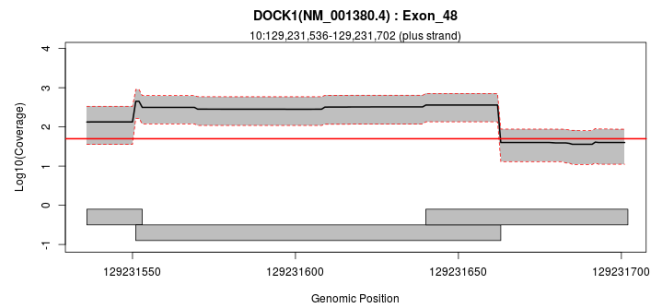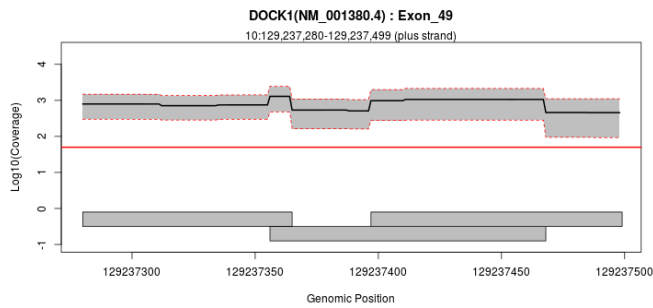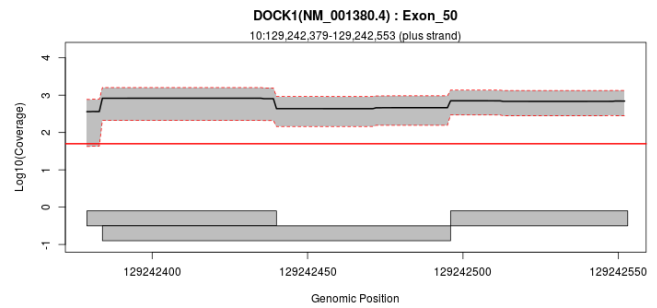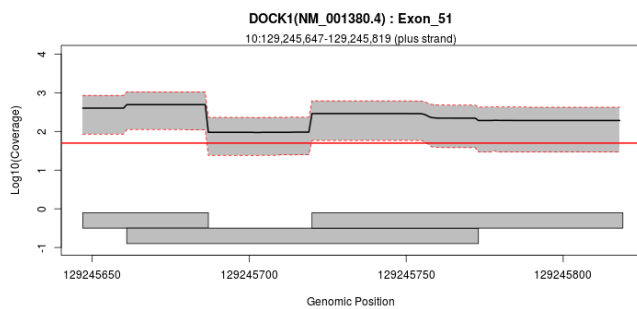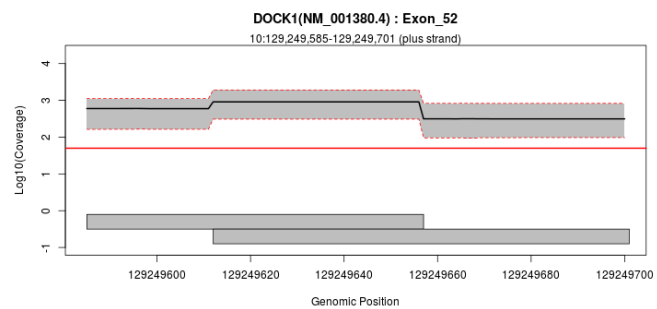

# Exon Overview: DOCK9 : NM\_001130048.1

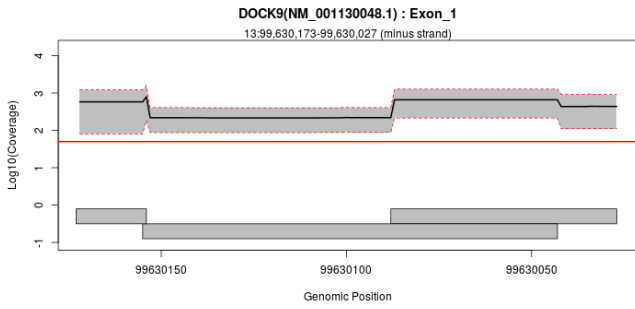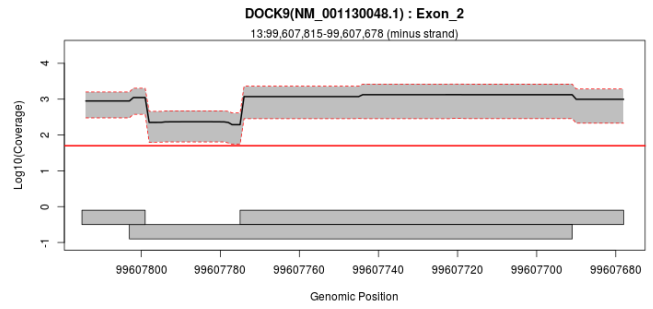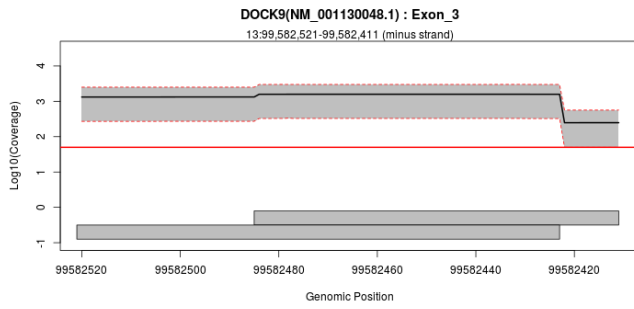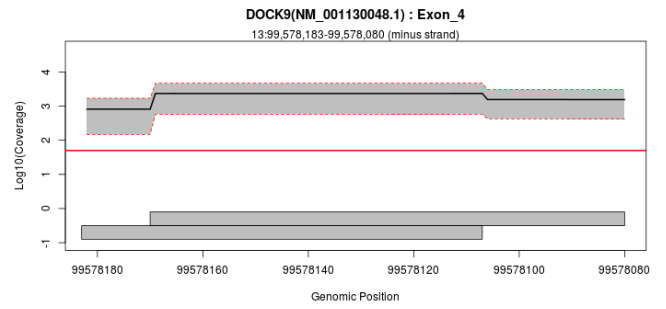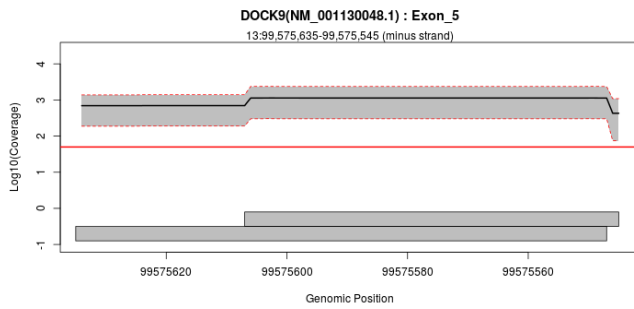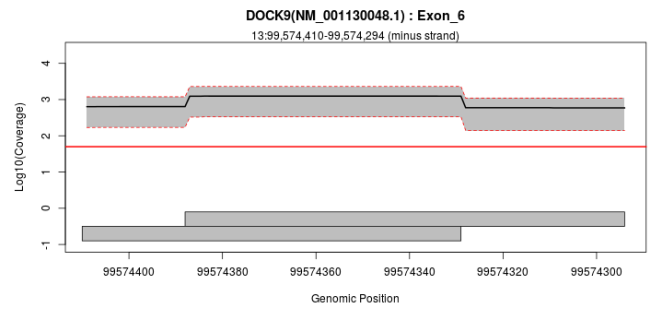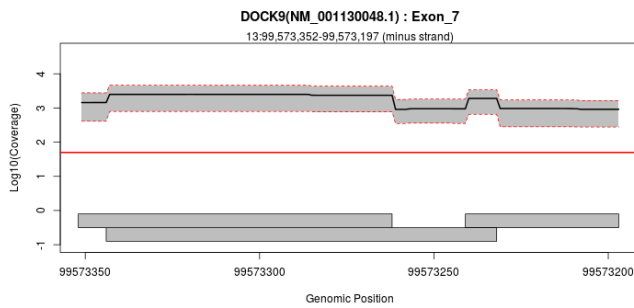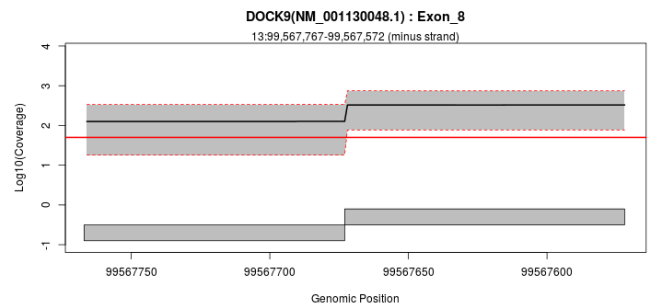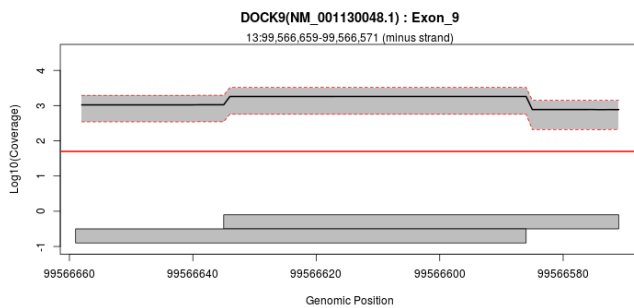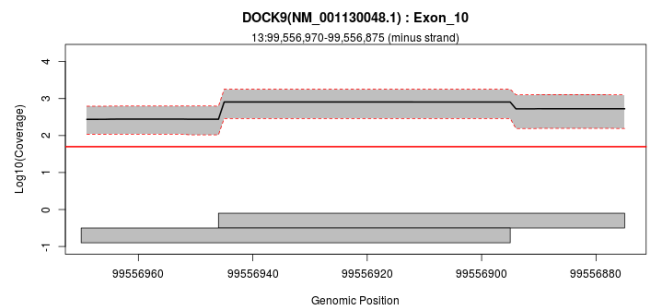

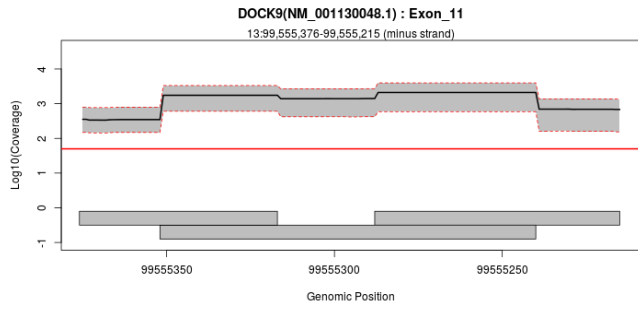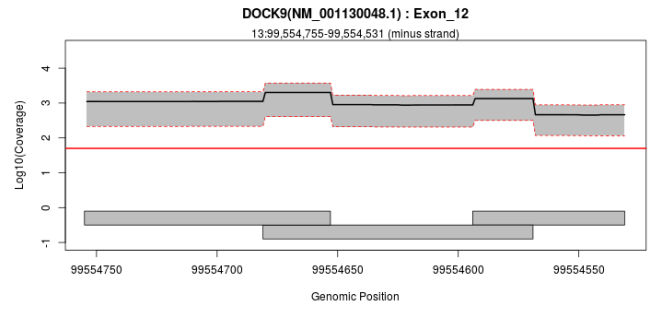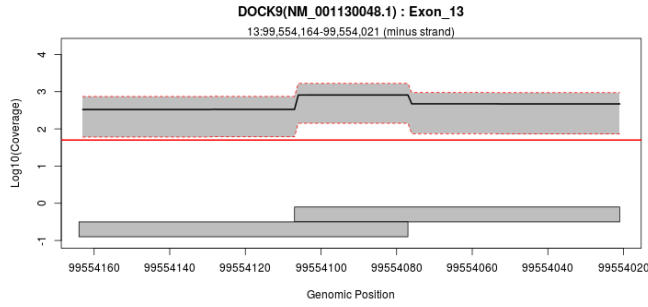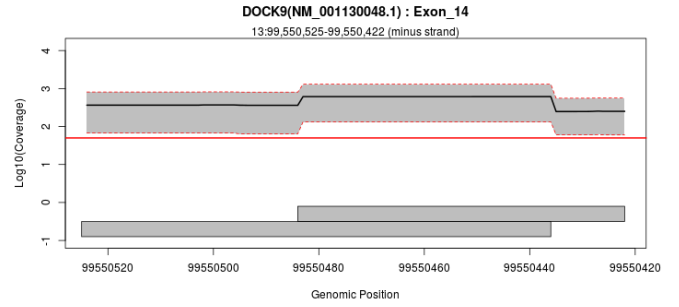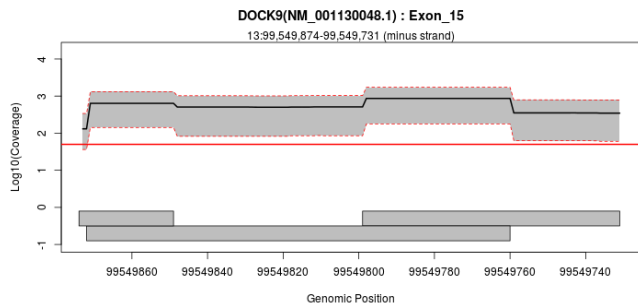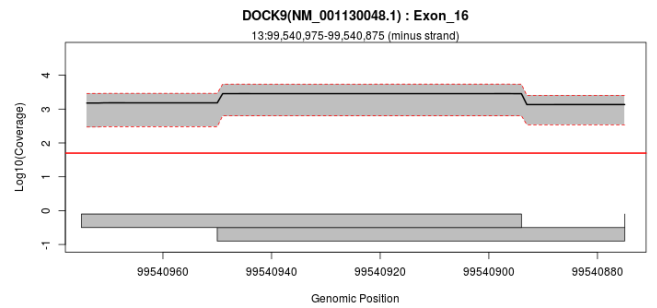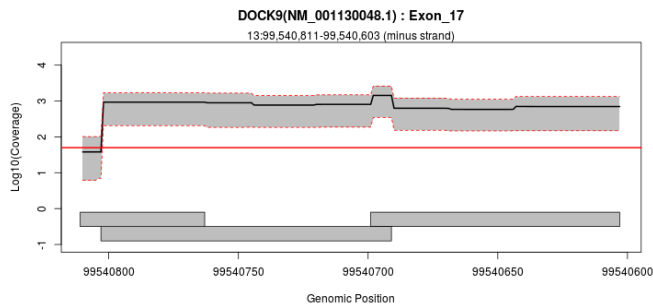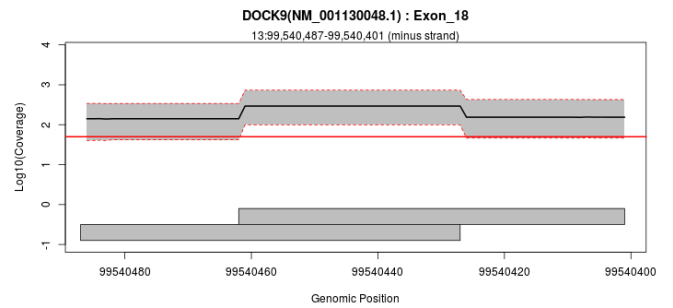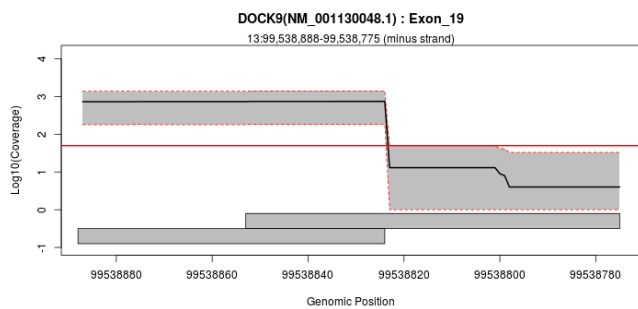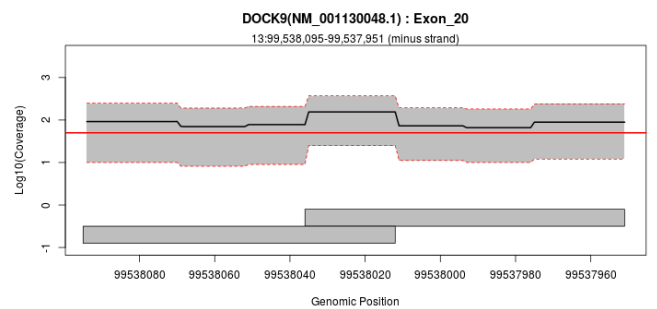

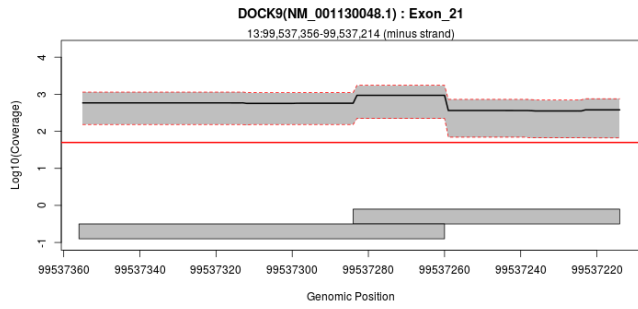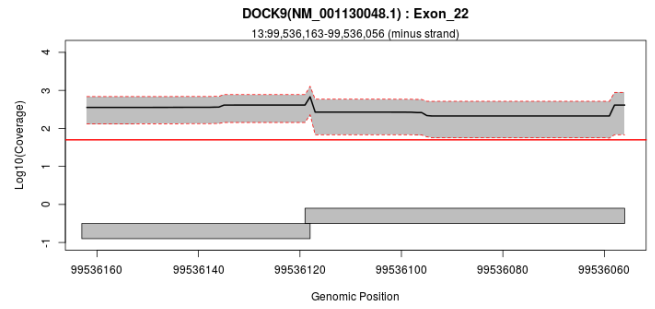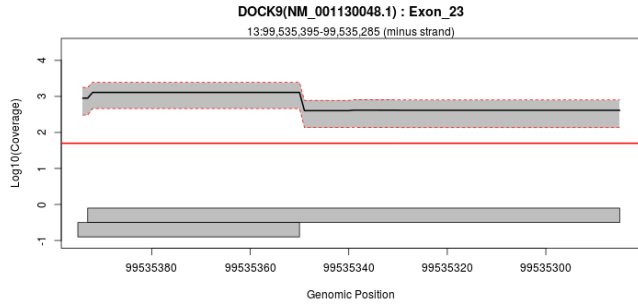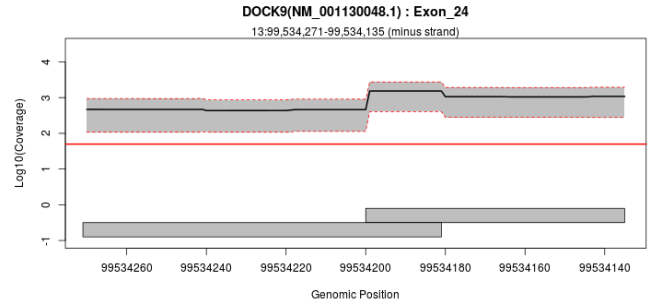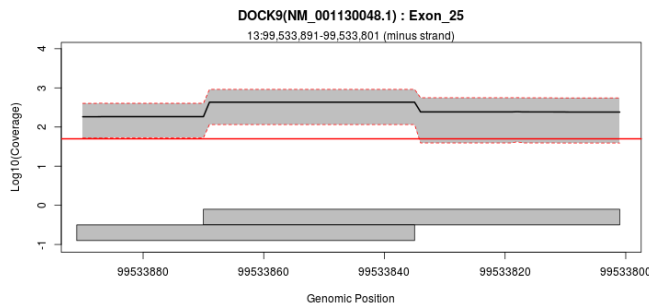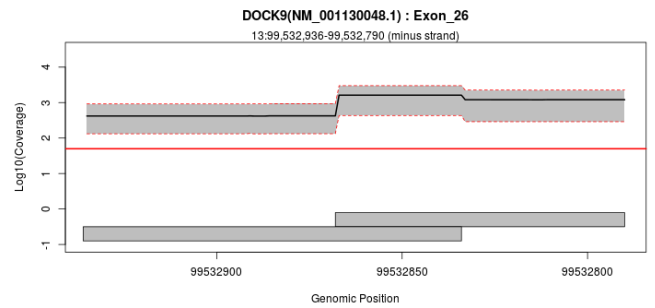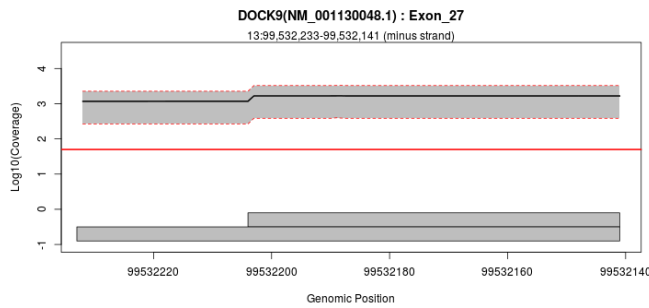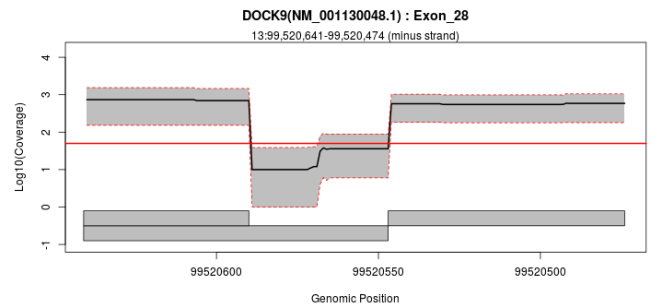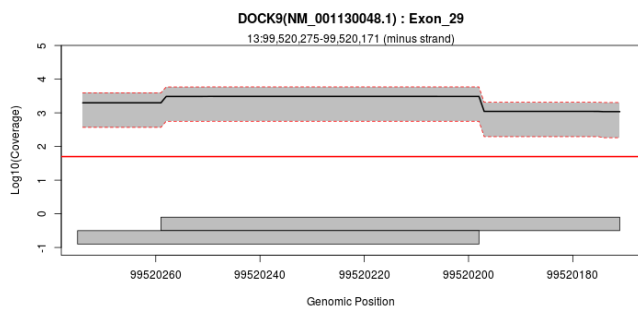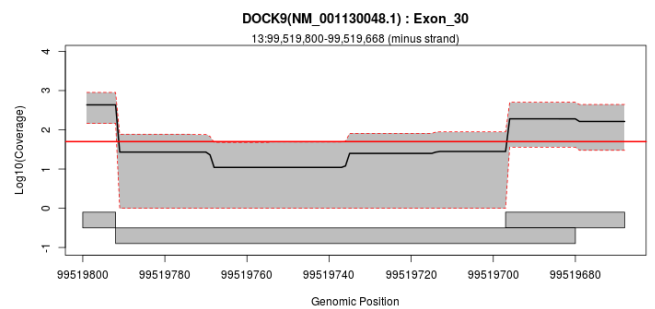

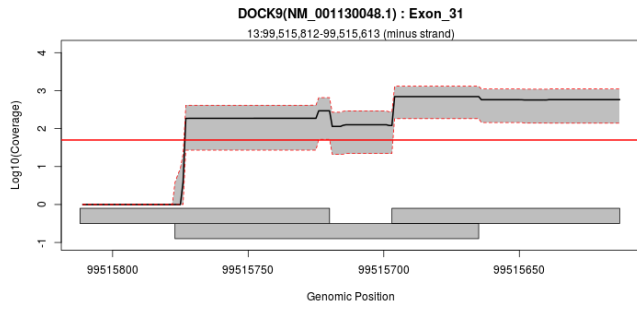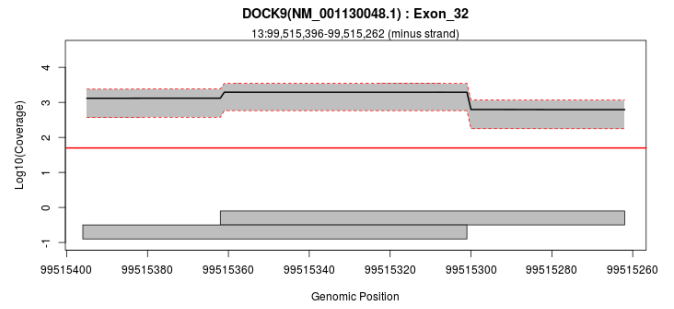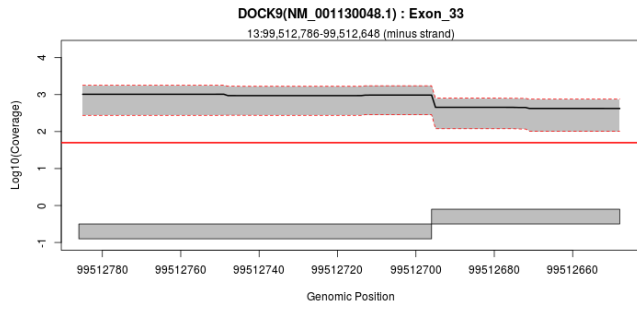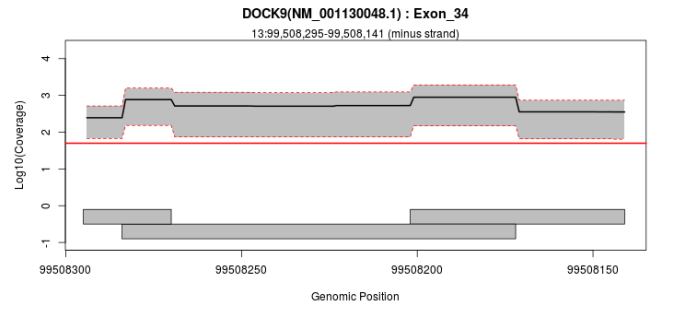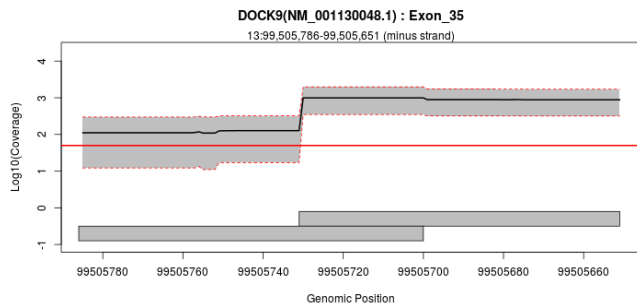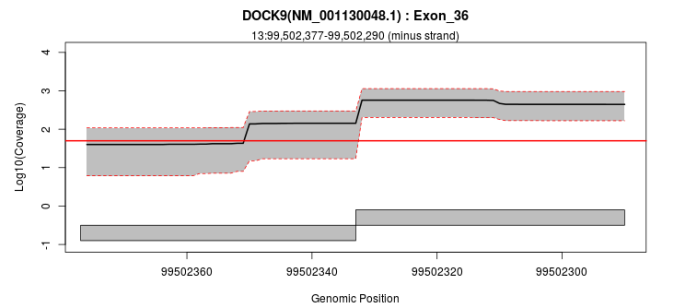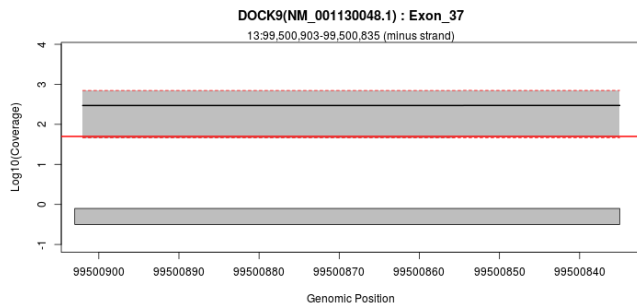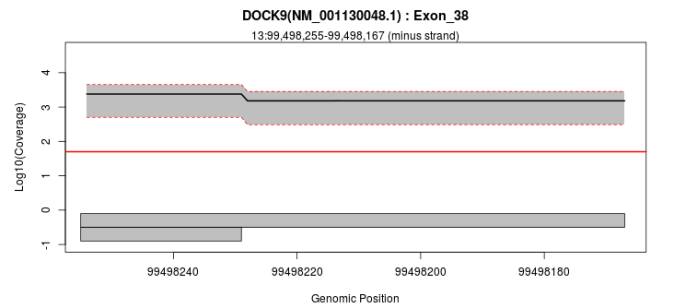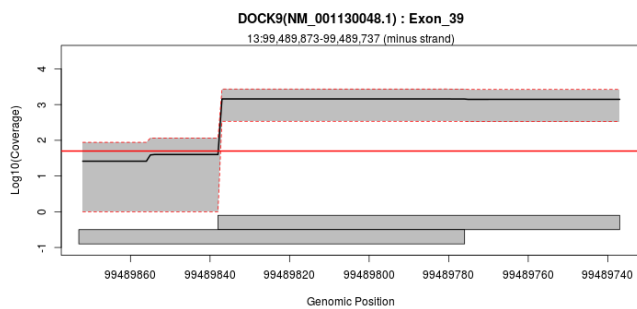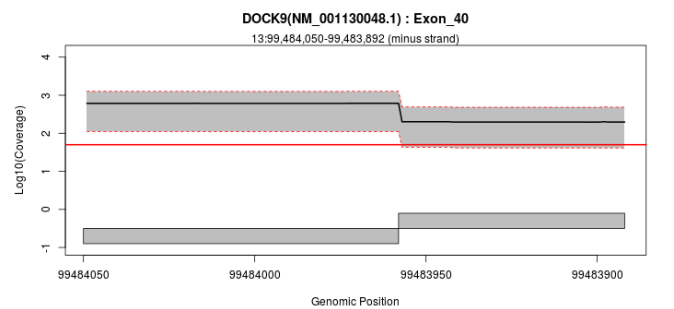

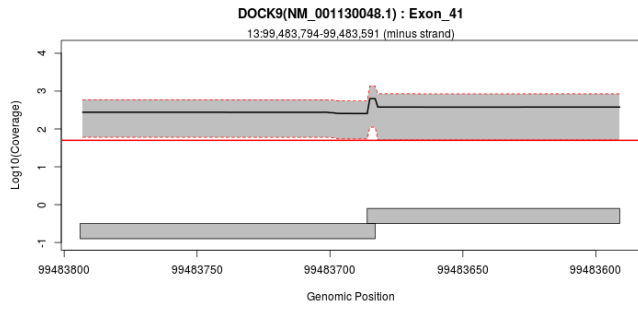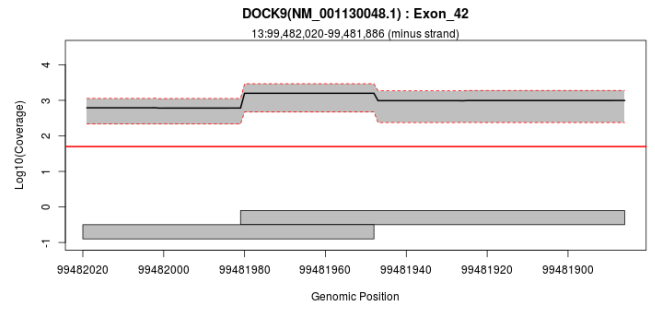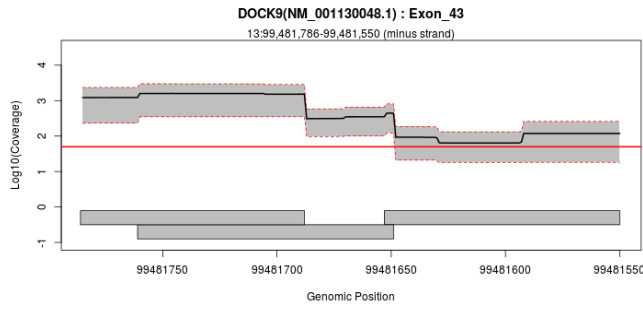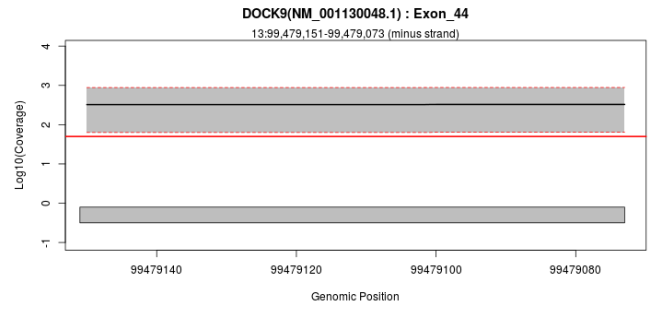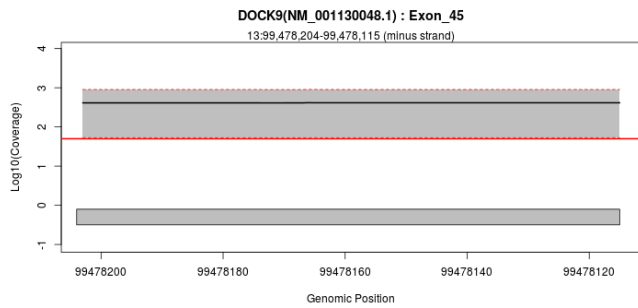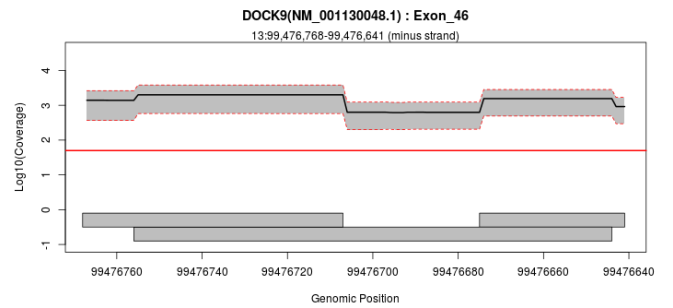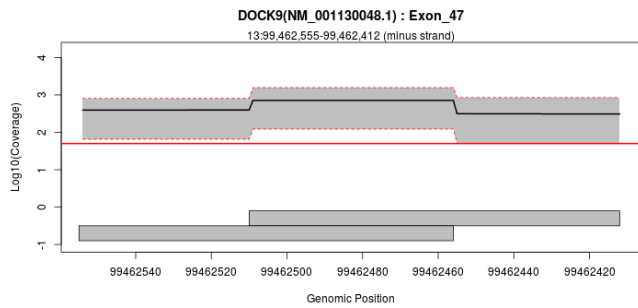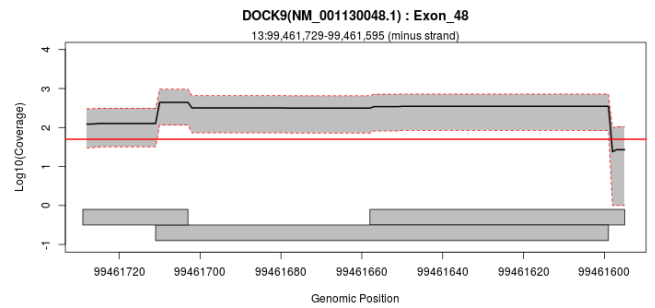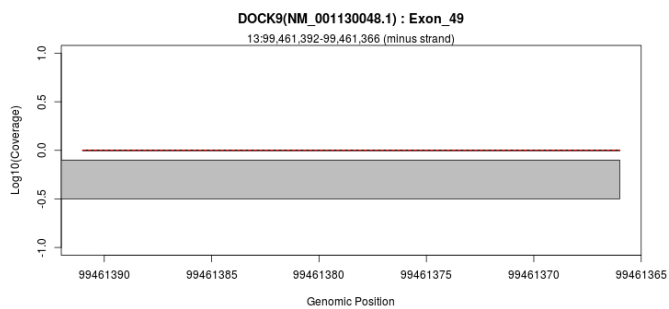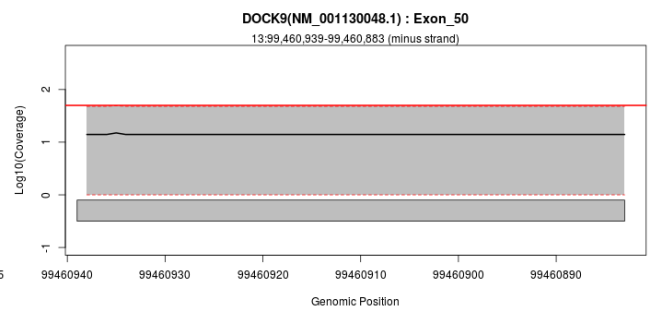

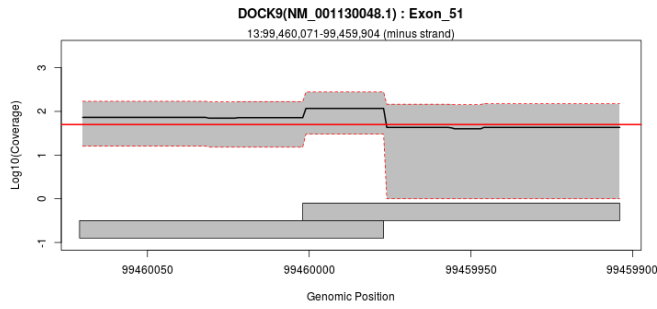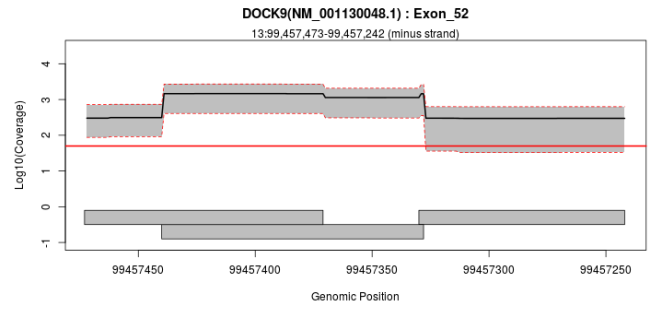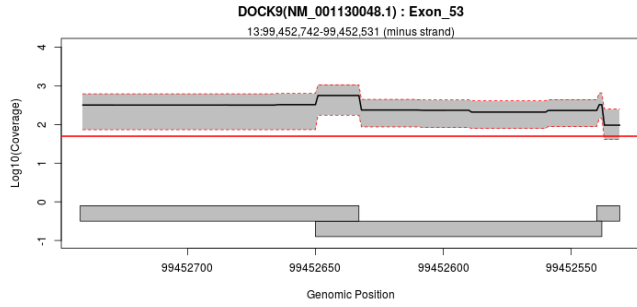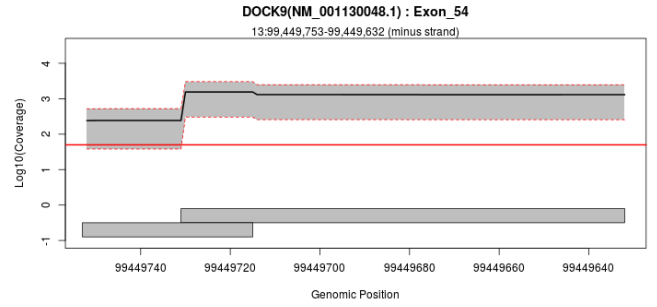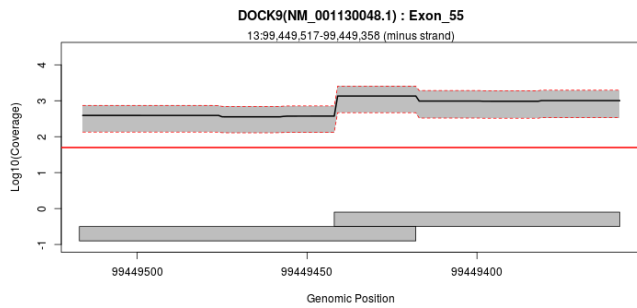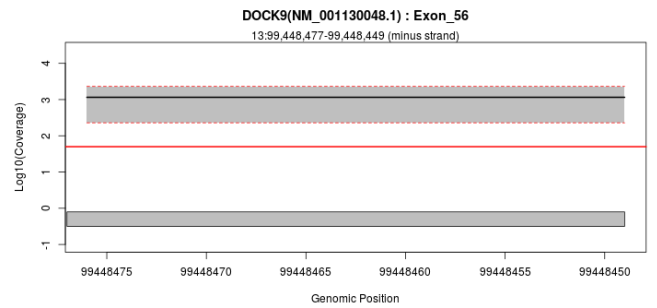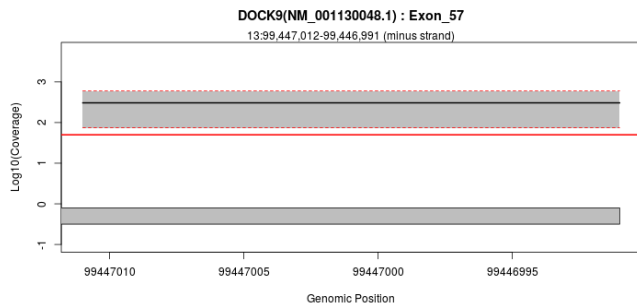

## Exon Overview: DOCK9 : NM\_001130049.1

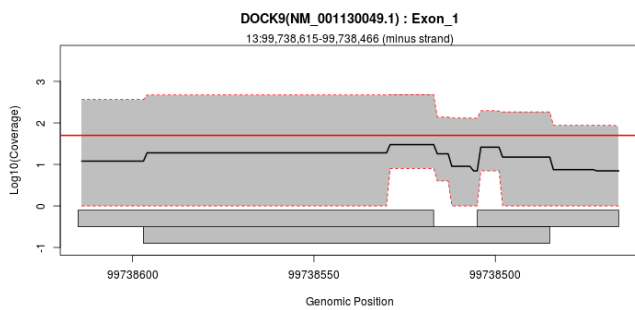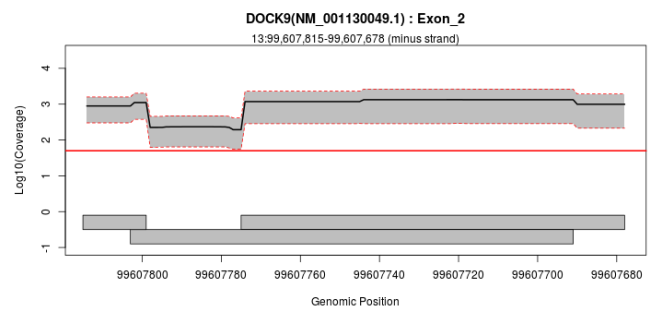

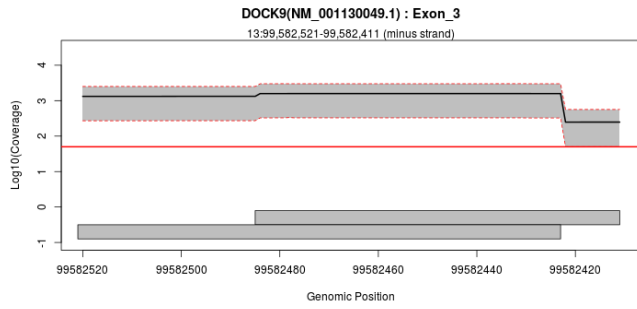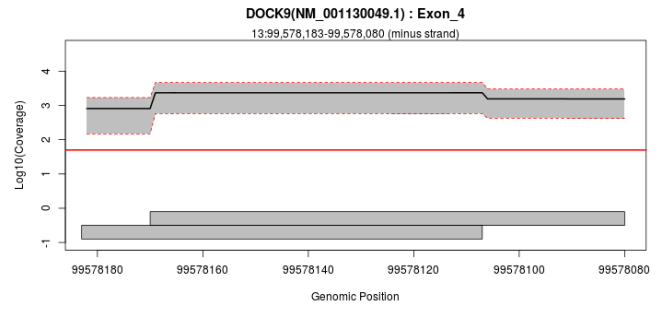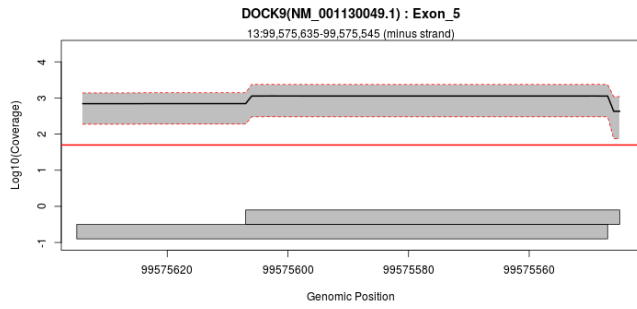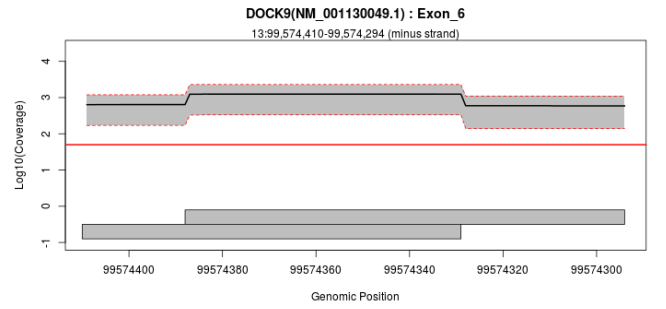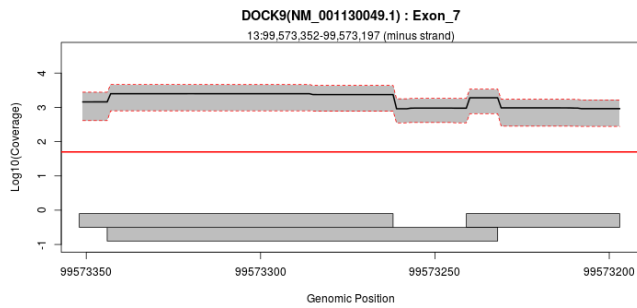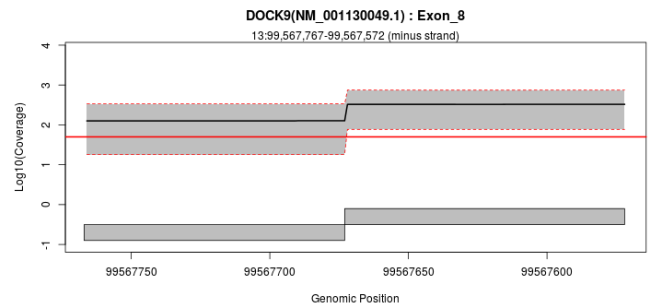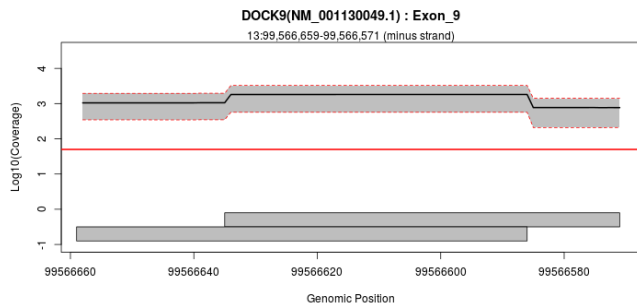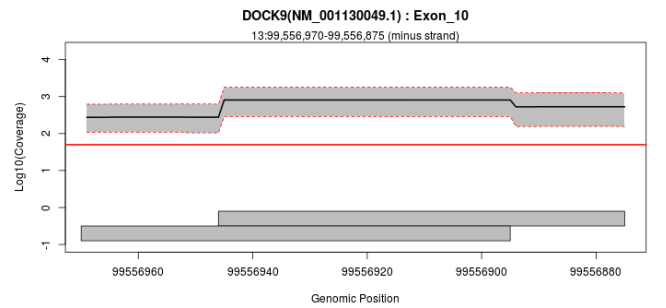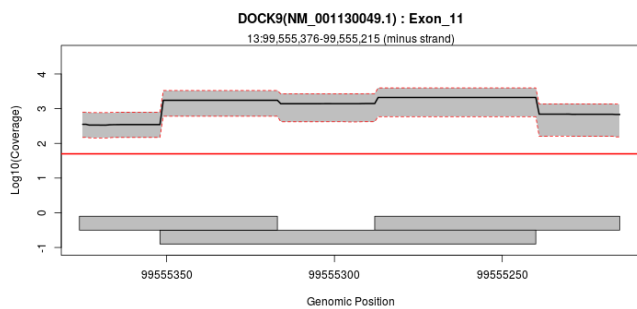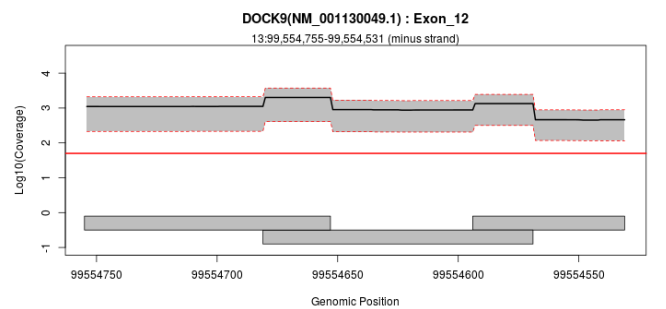



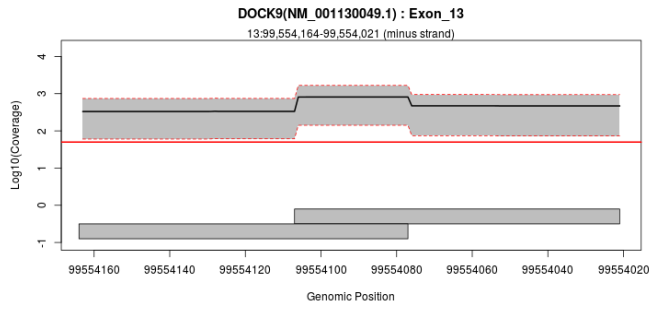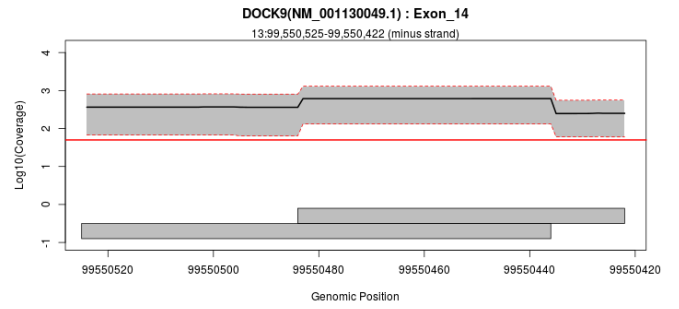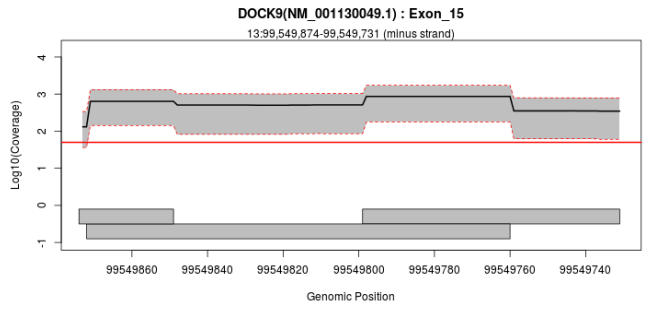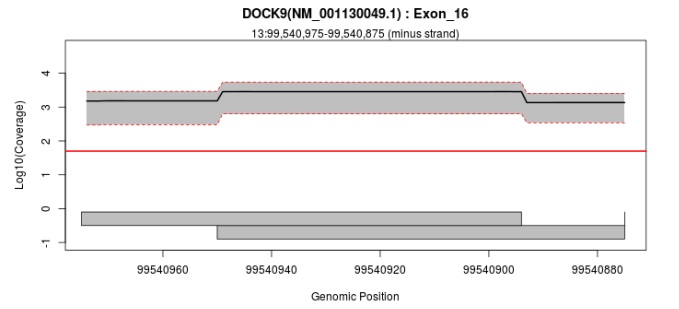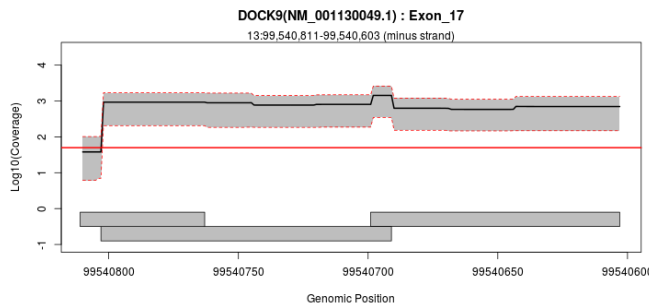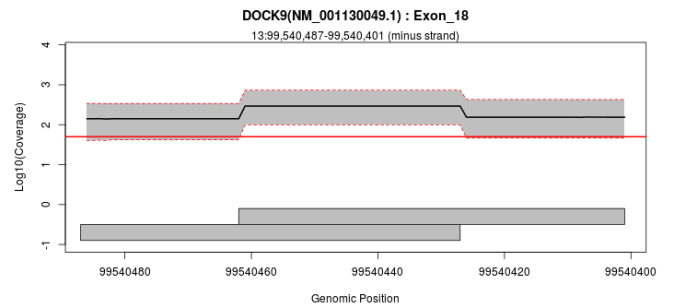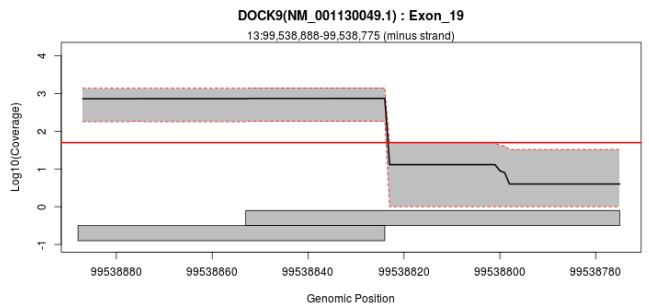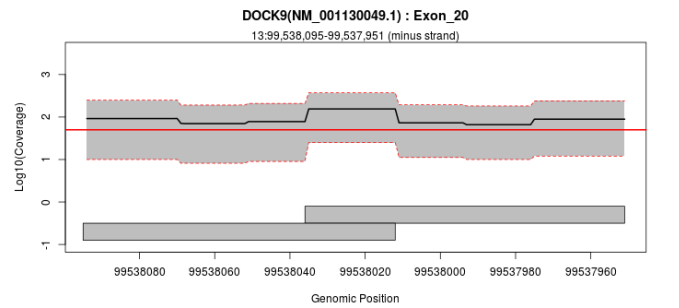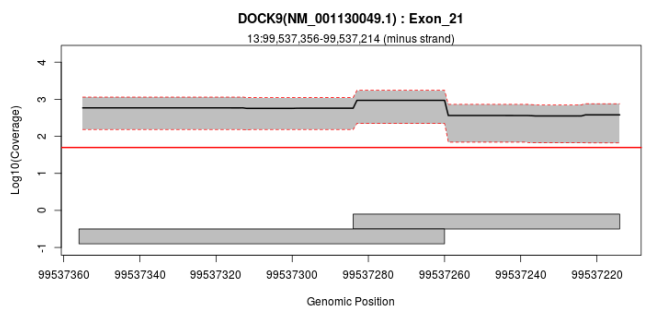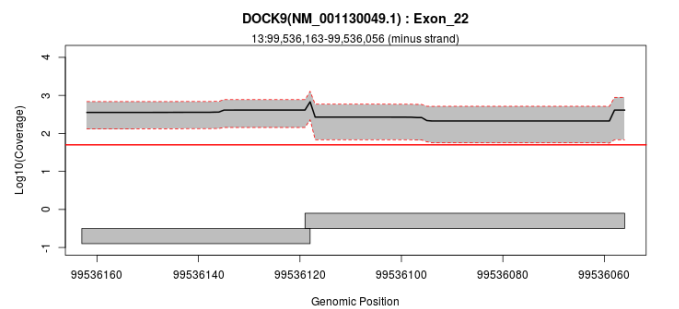

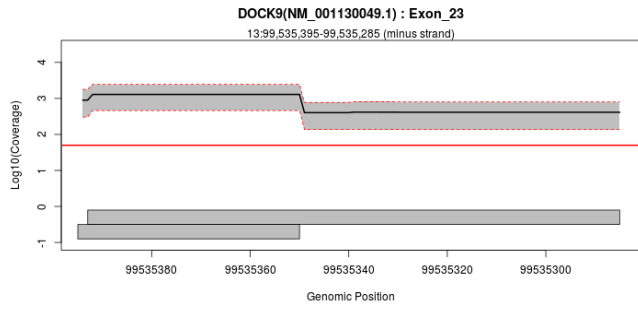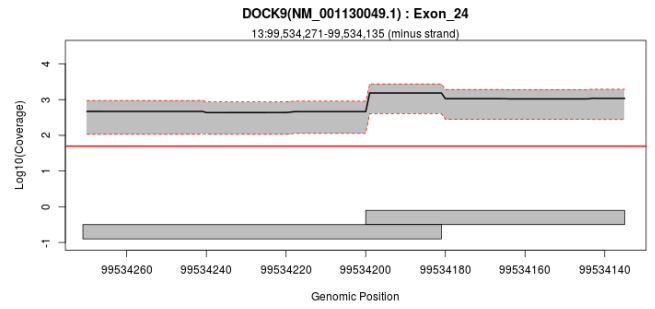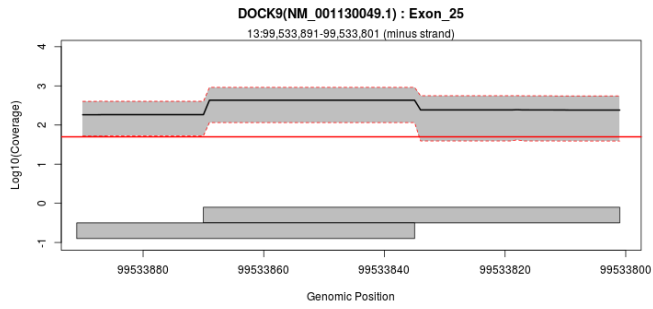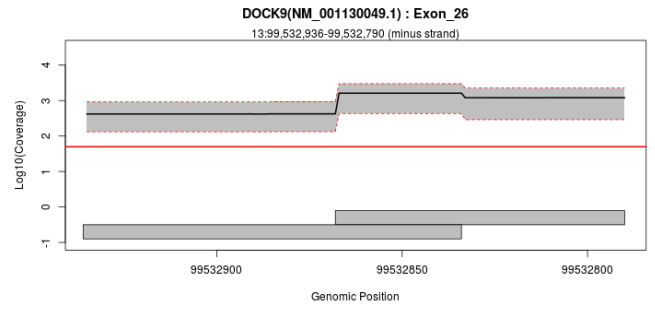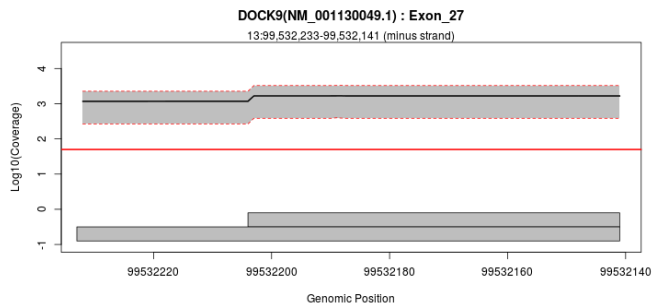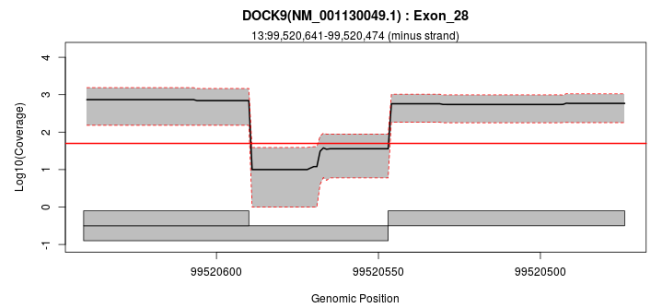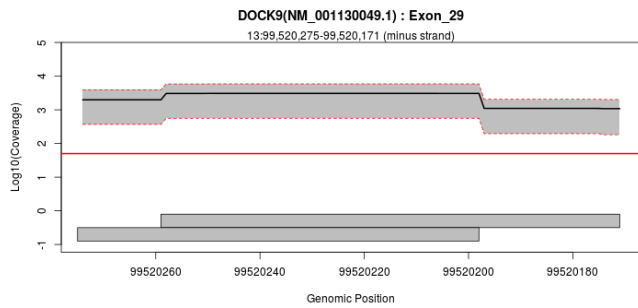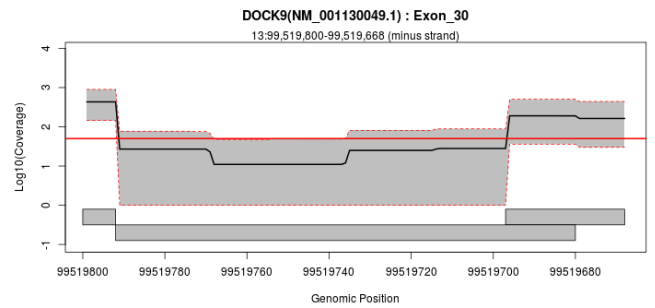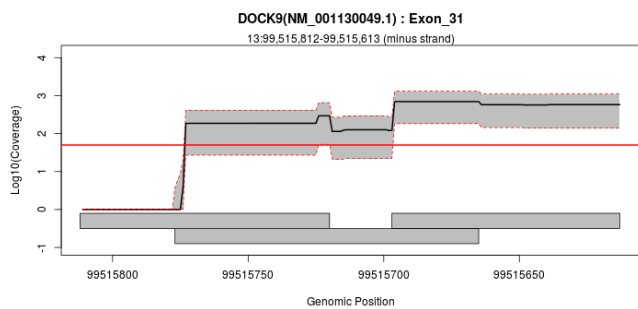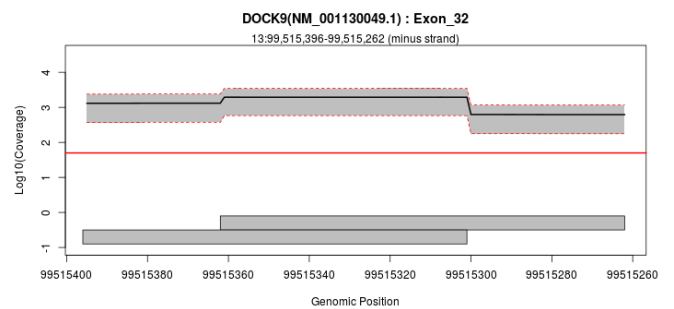

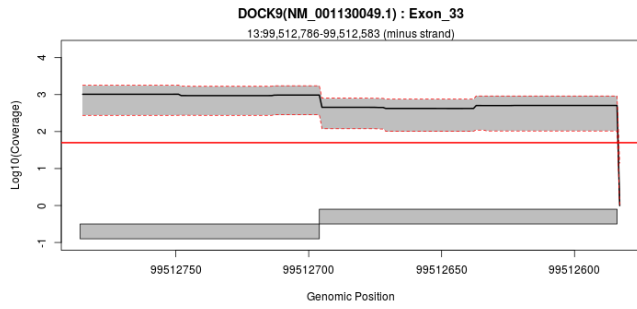

## Exon Overview: DOCK9 : NM\_001130050.1

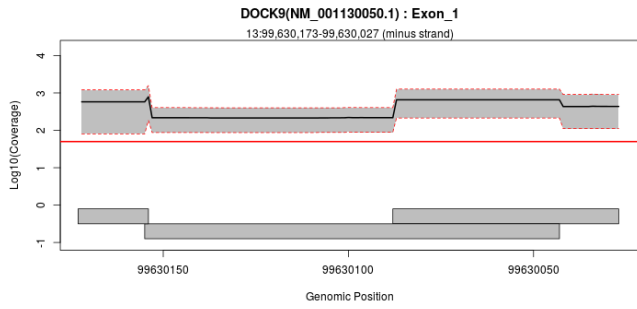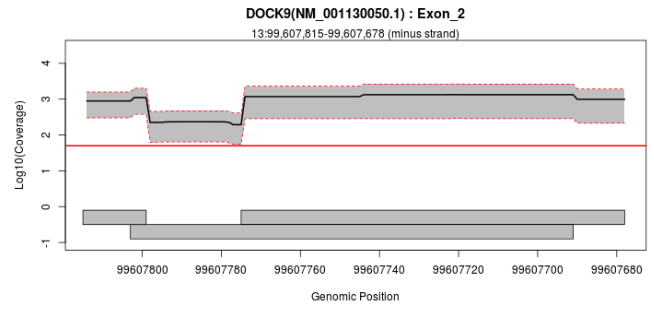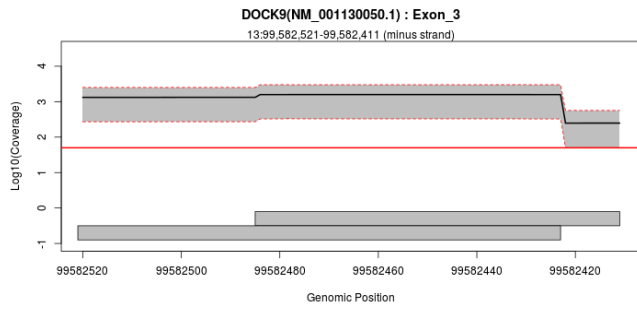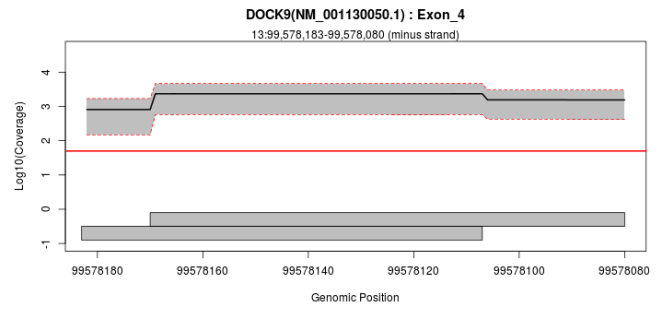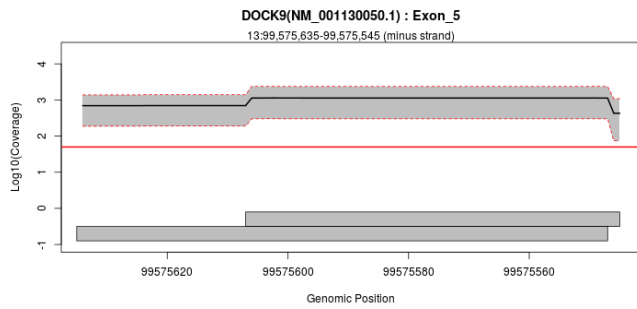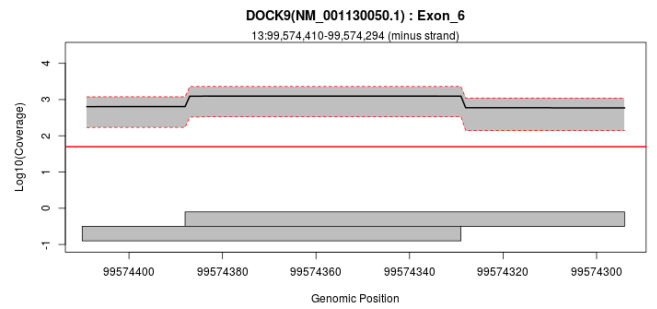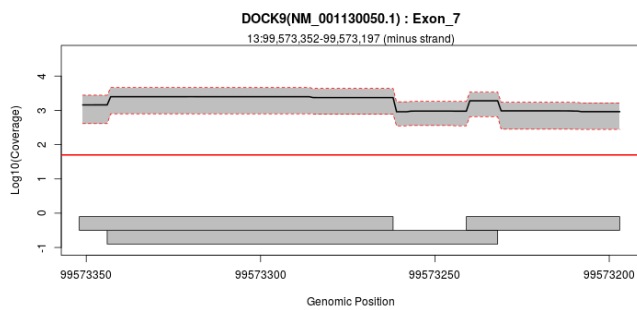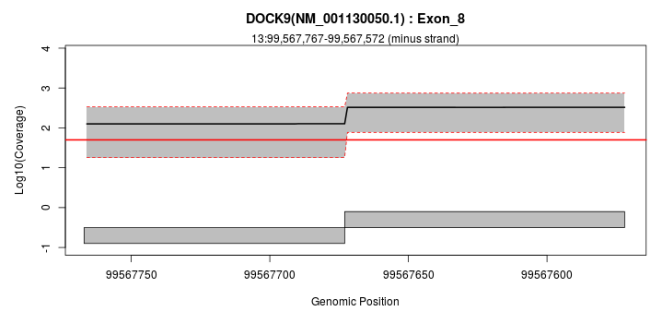

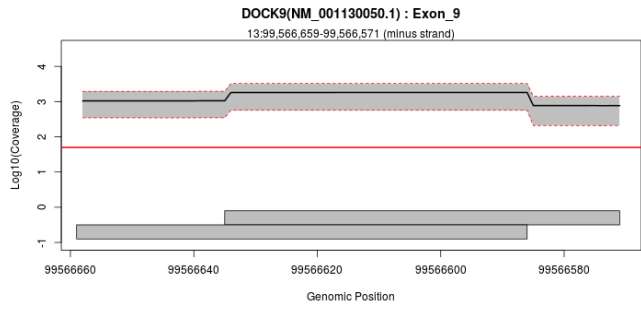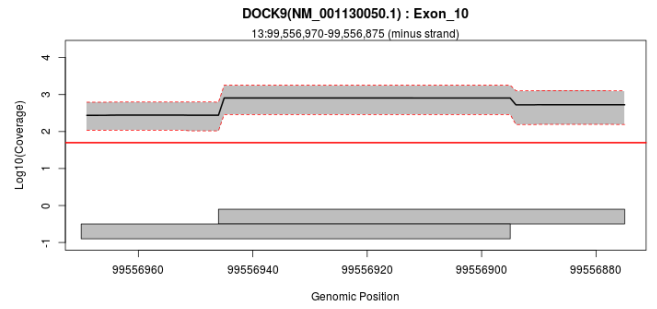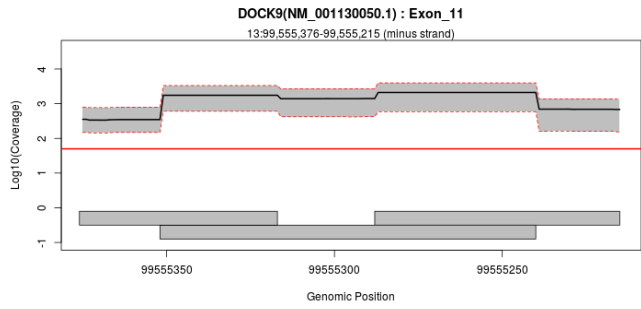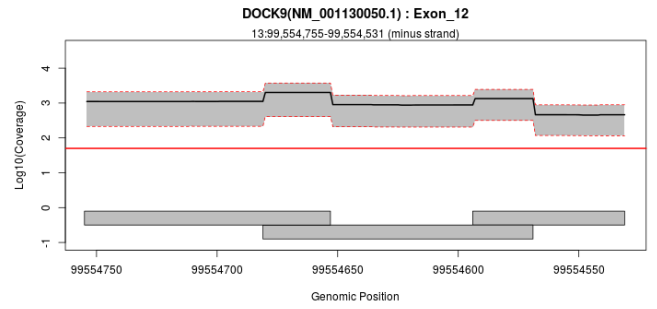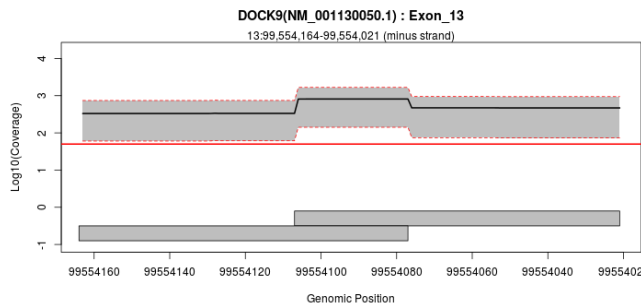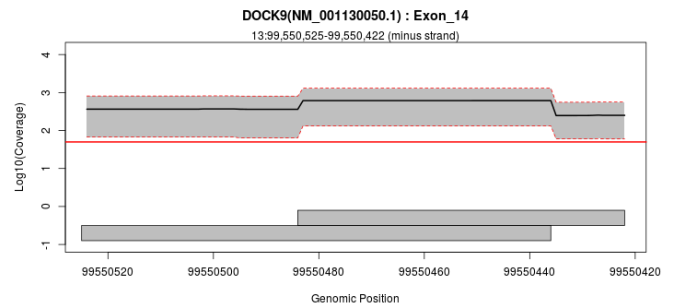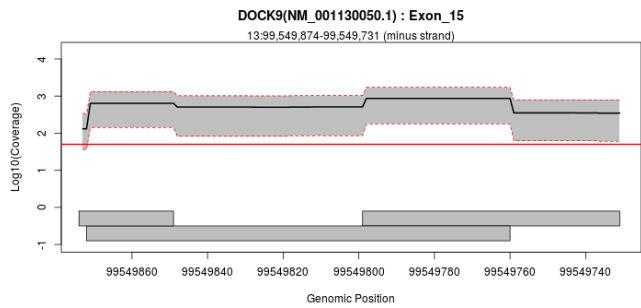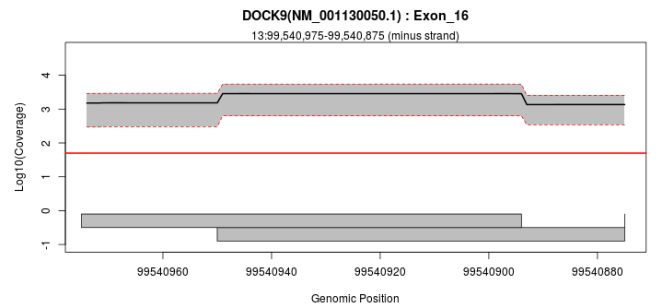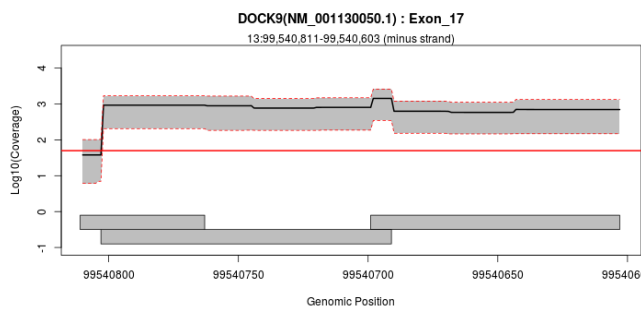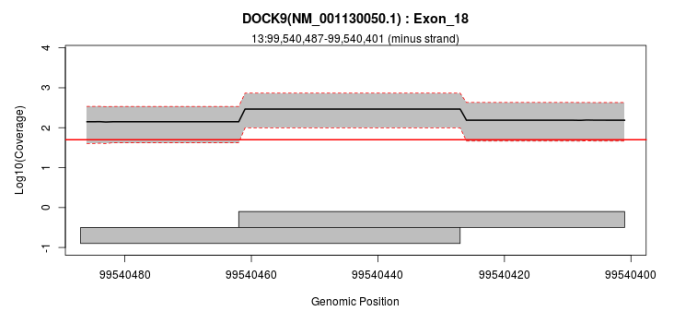

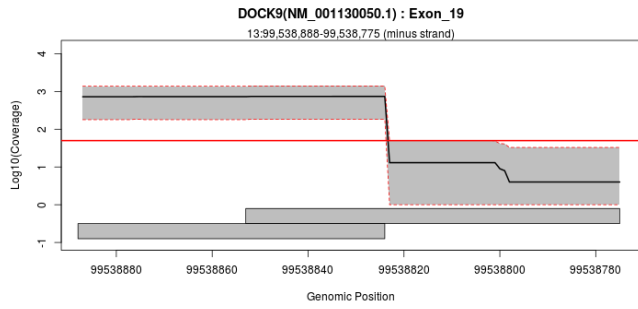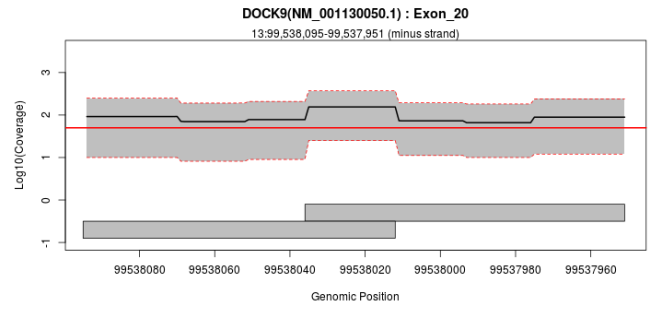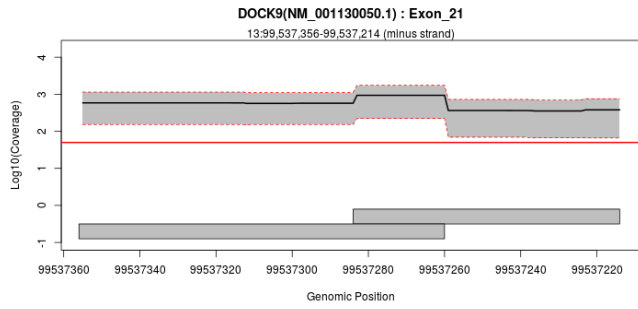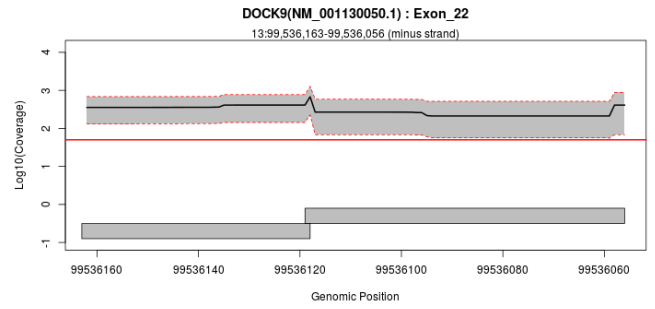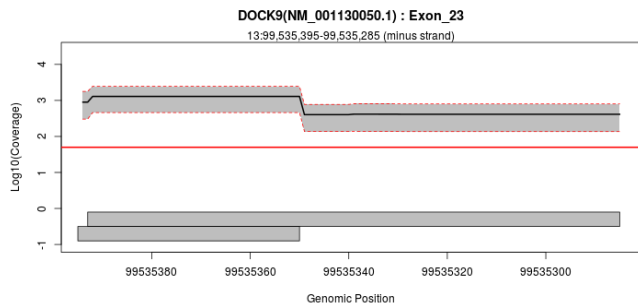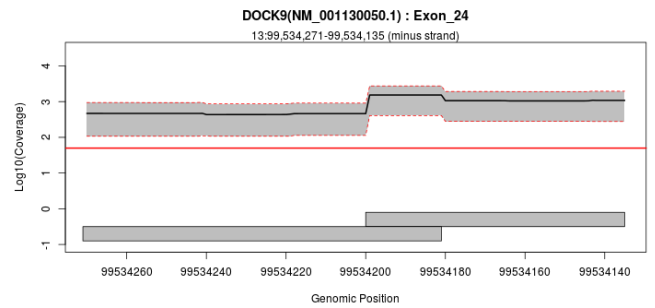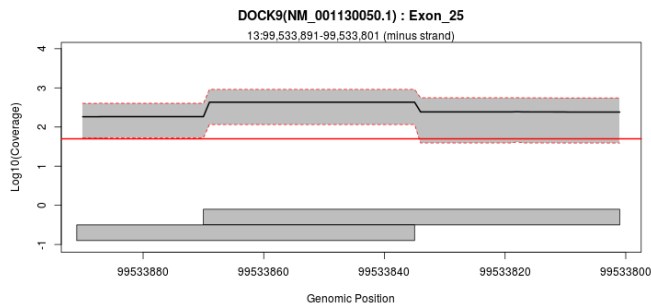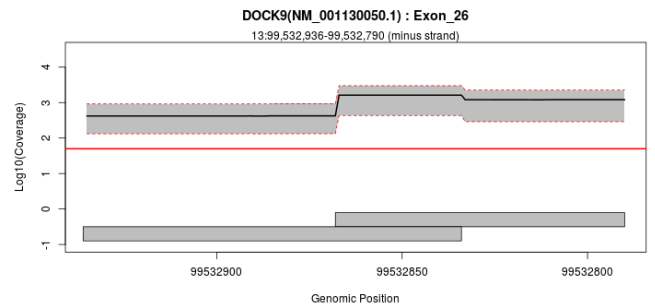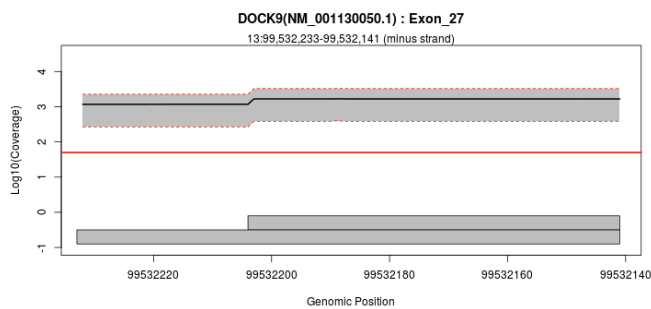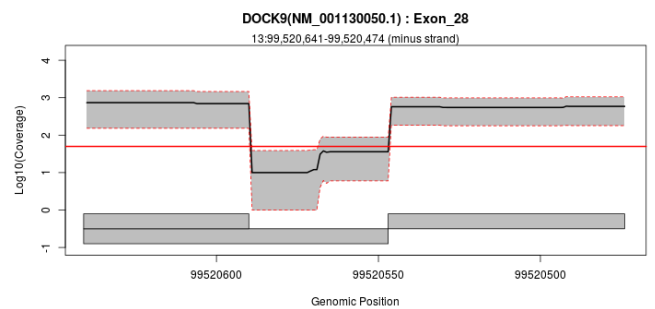

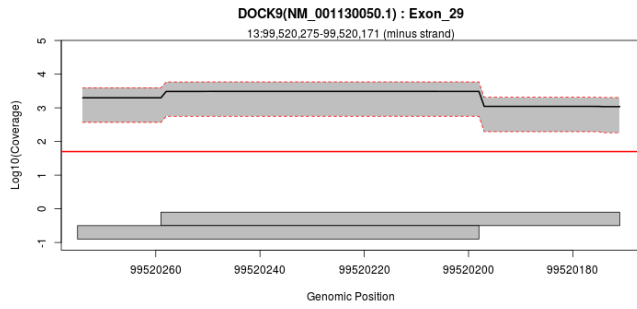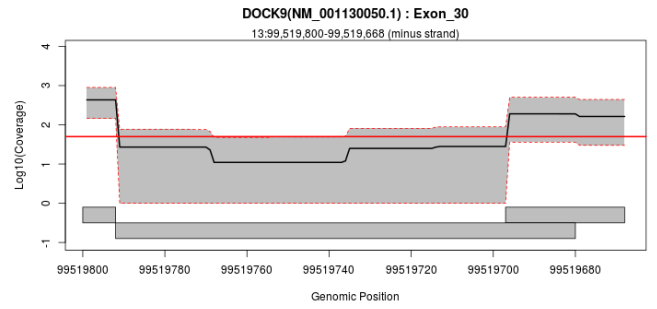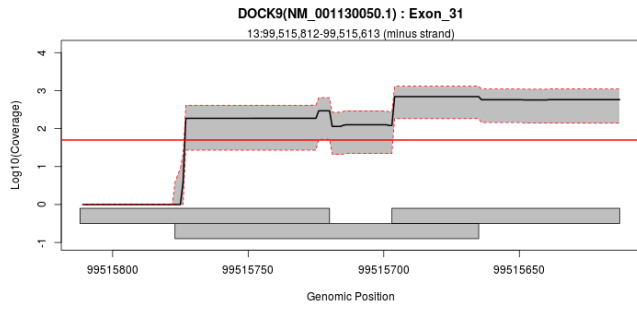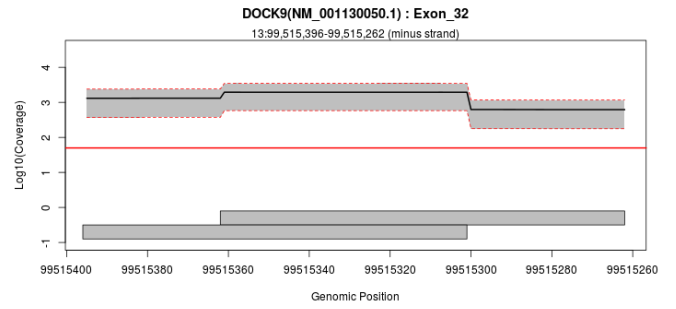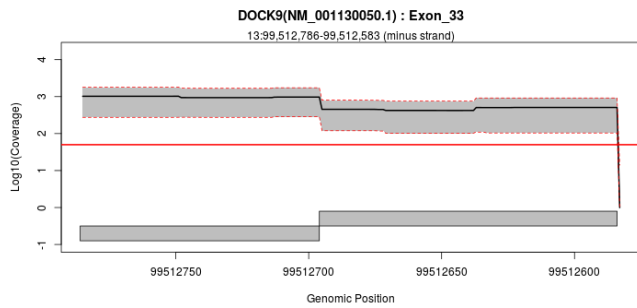

## Exon Overview: DOCK9 : NM\_001318849.1

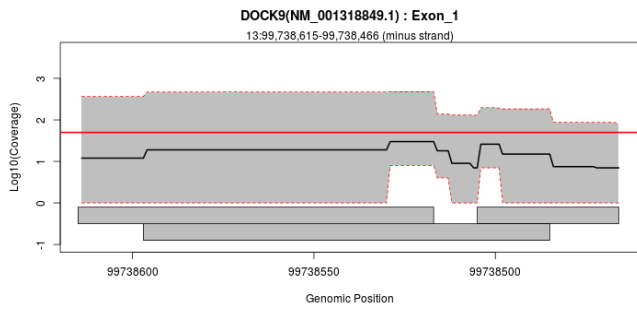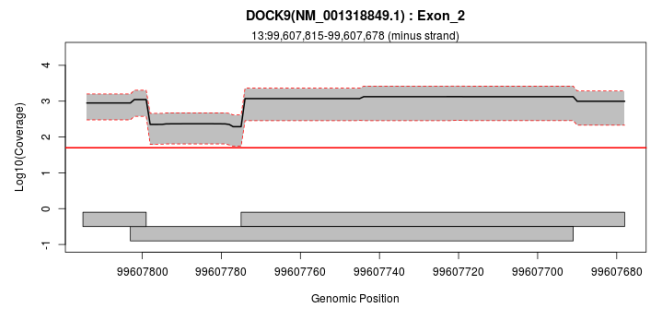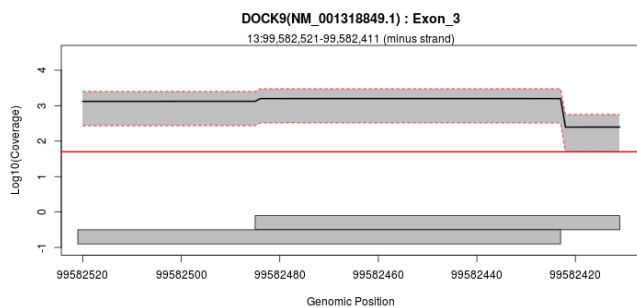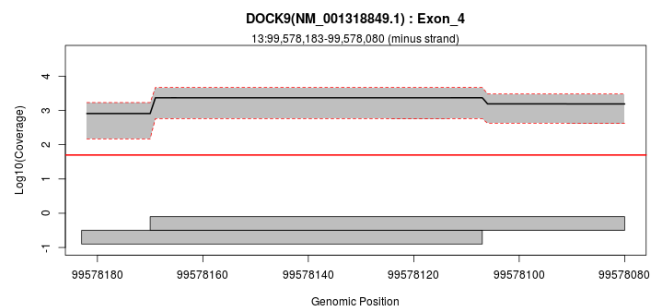

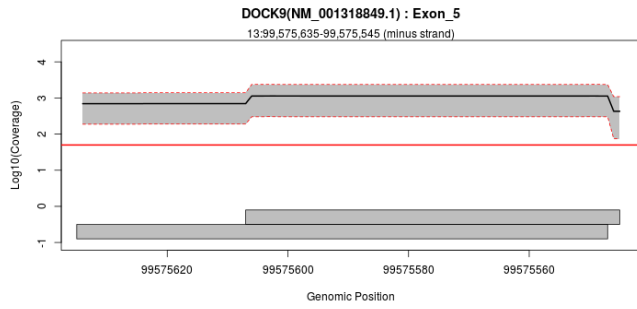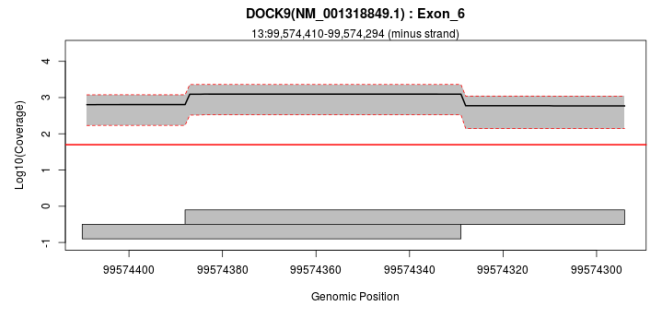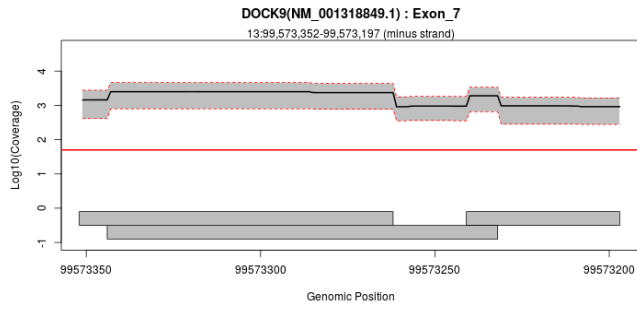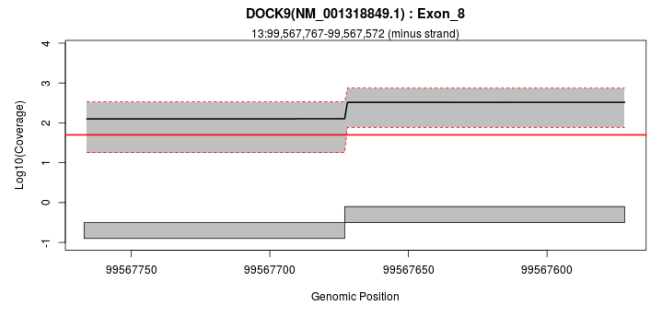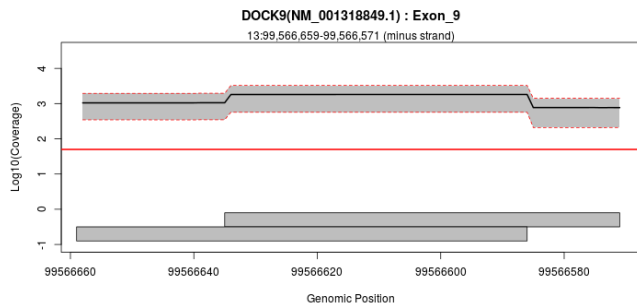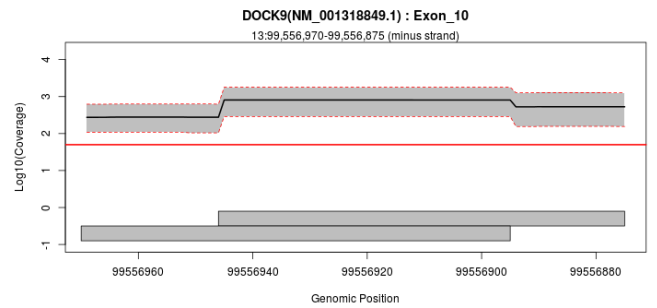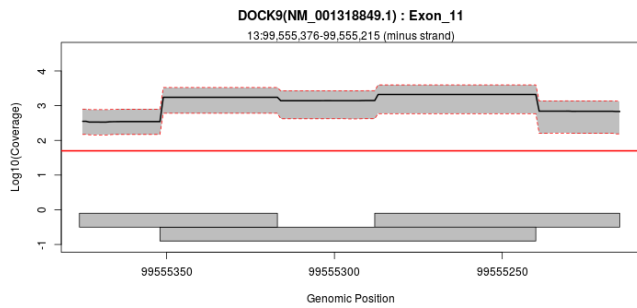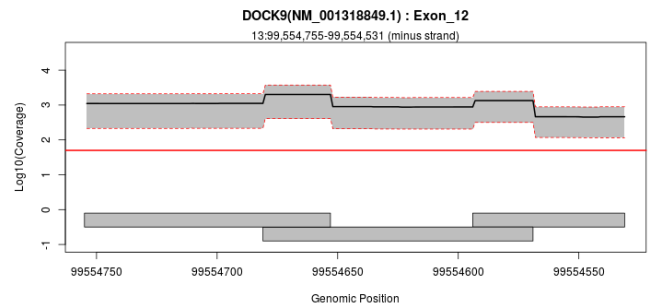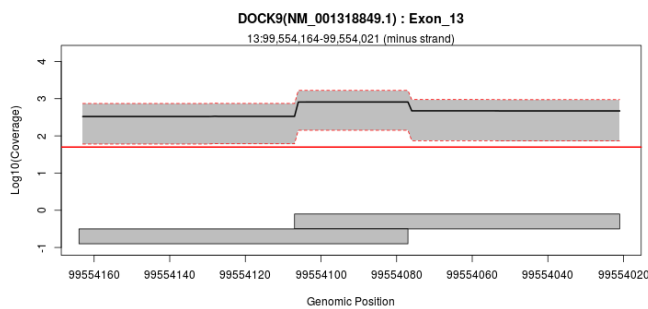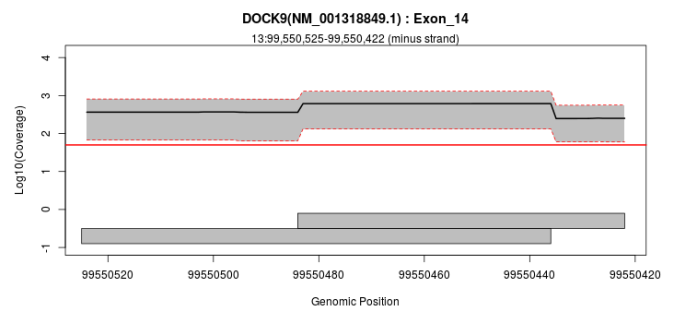

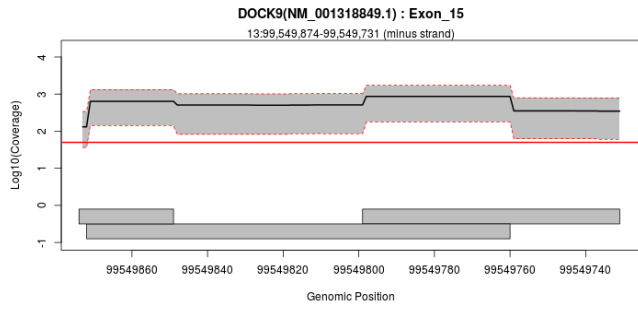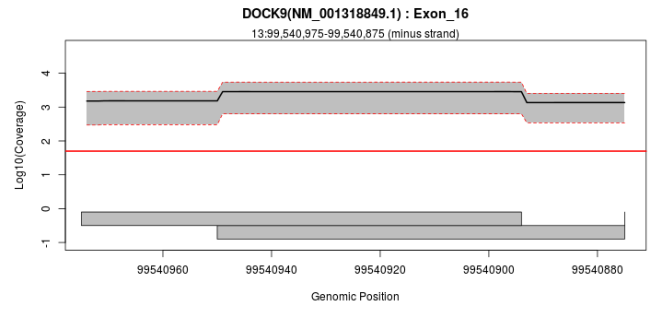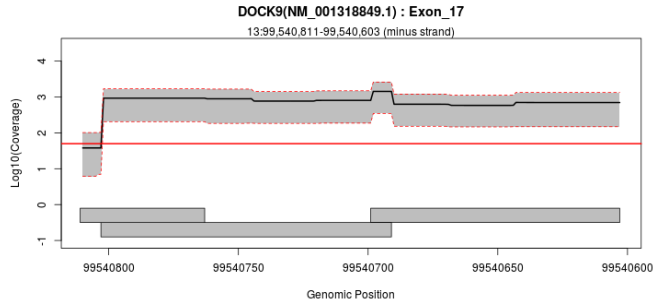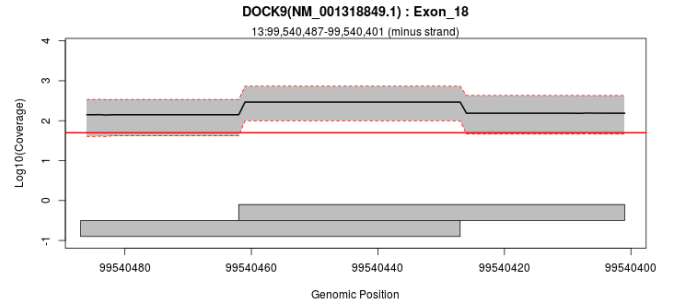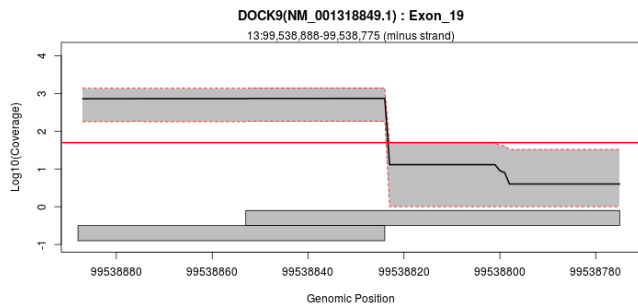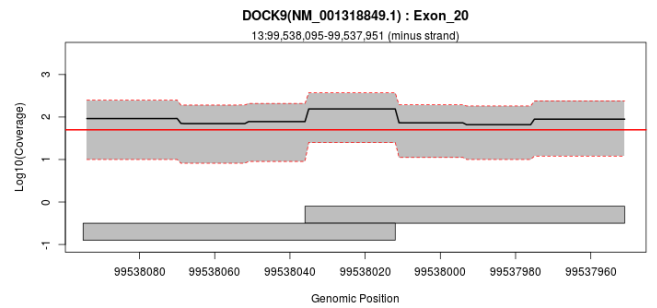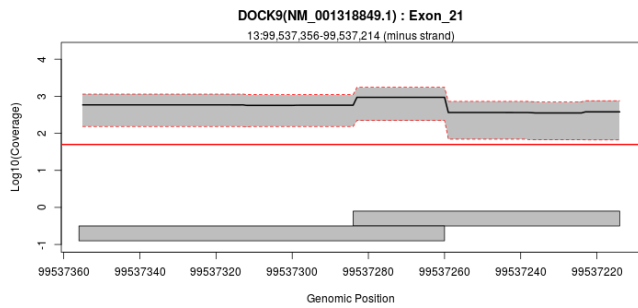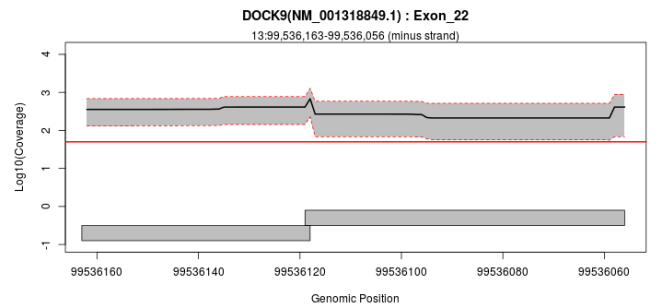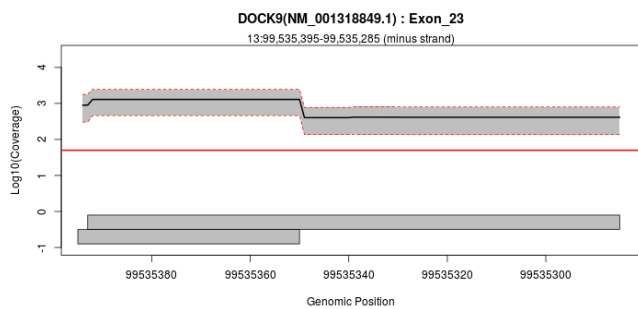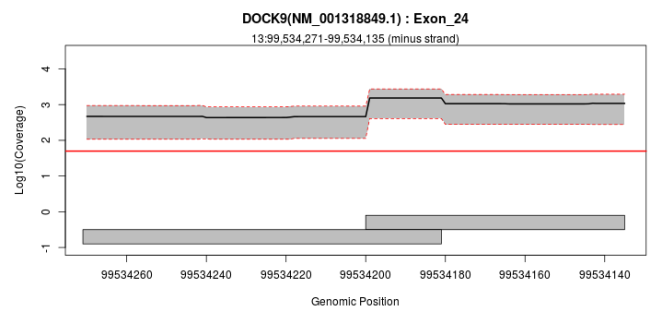



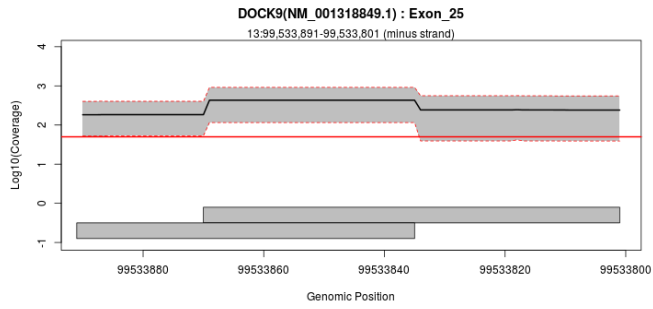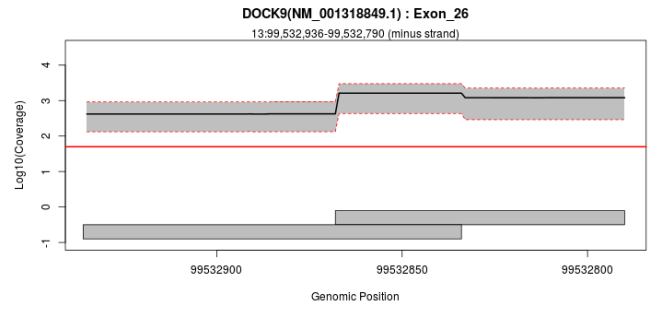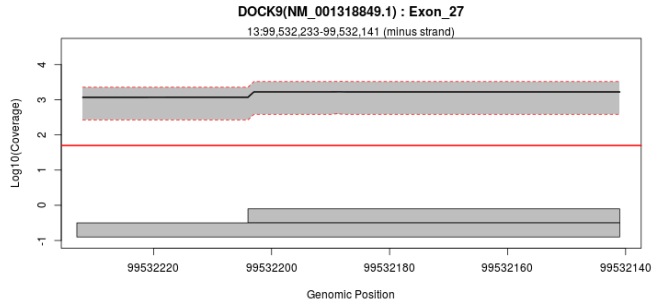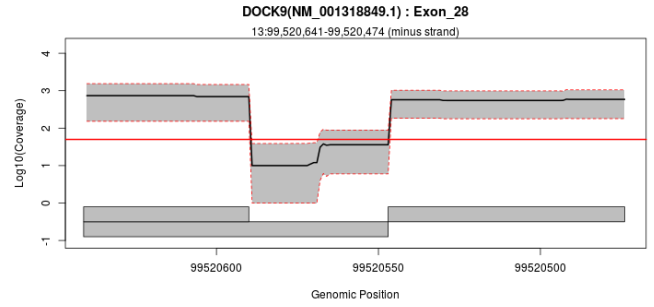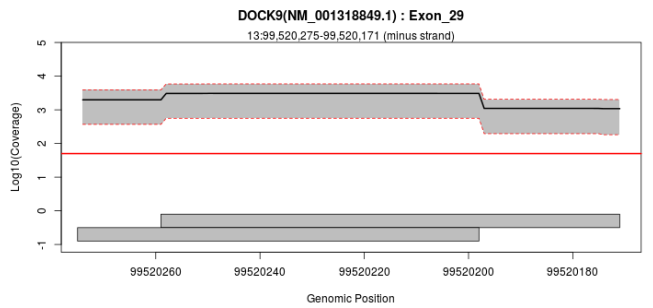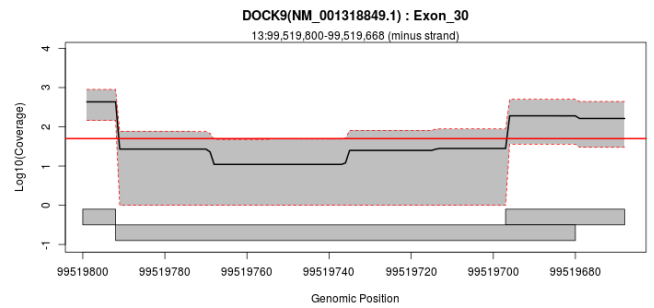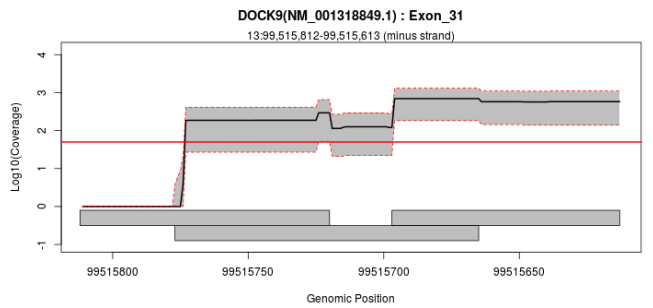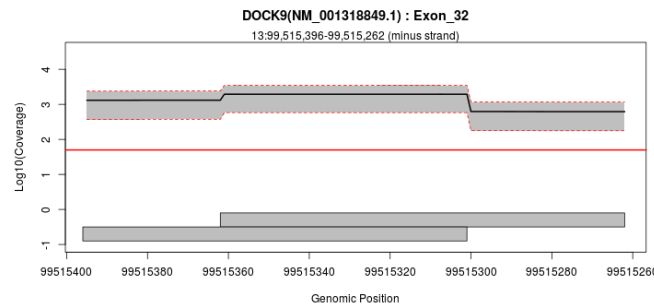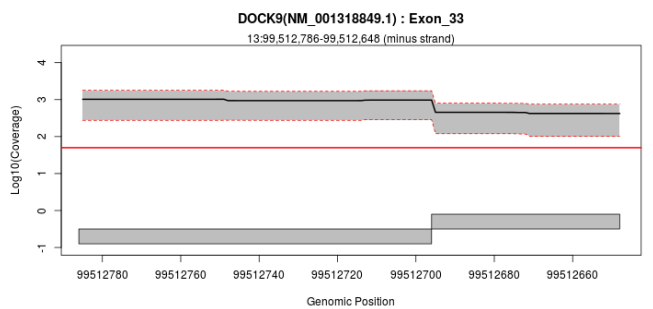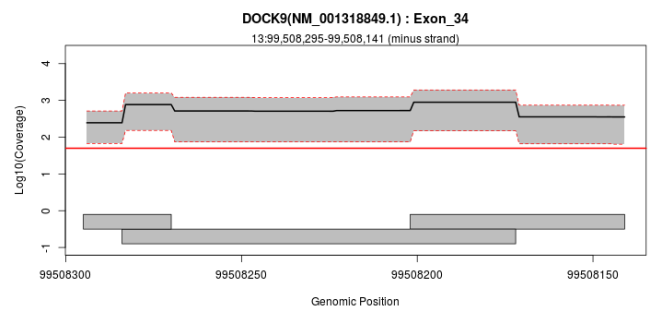

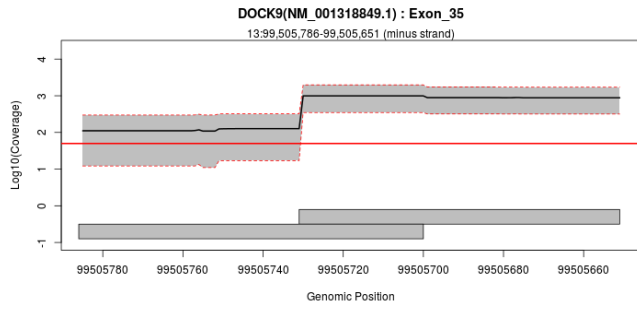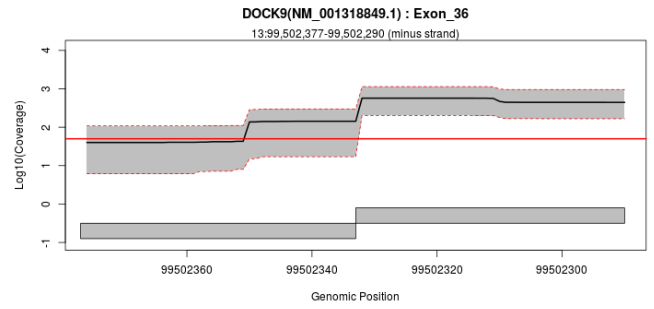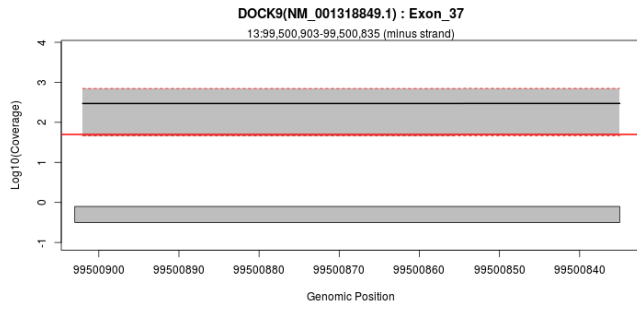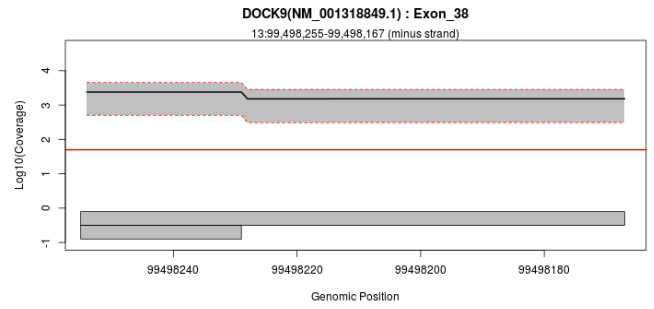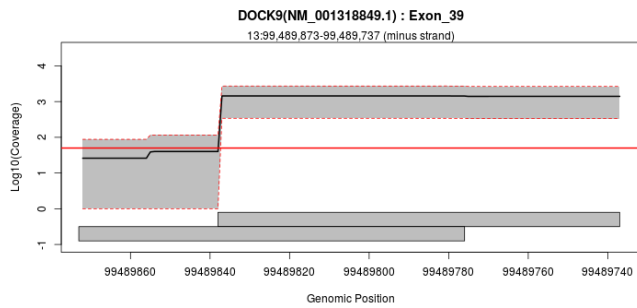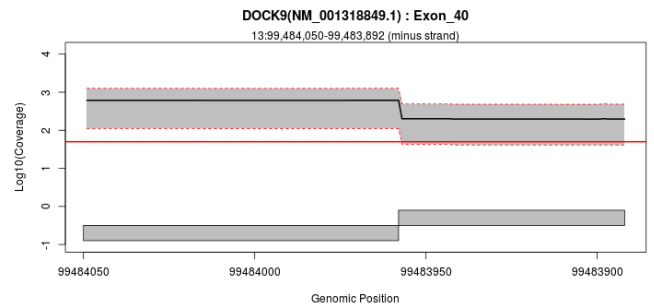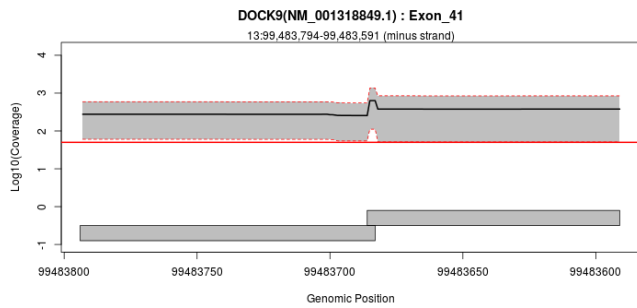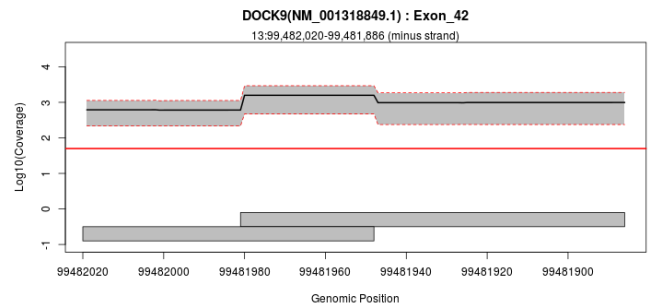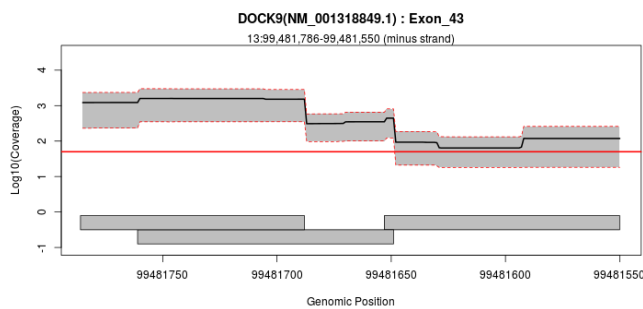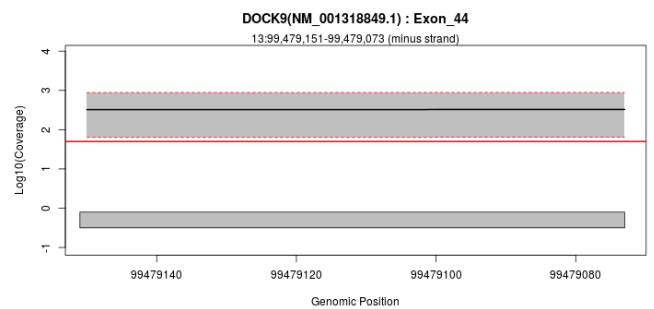

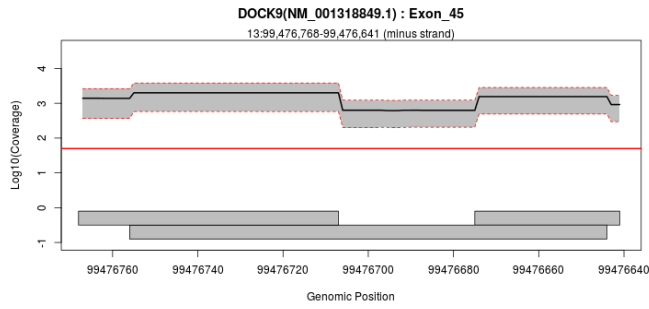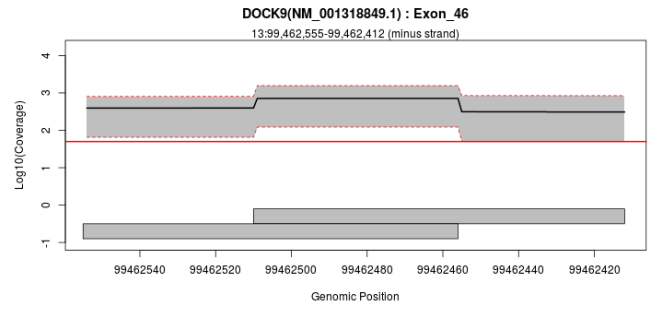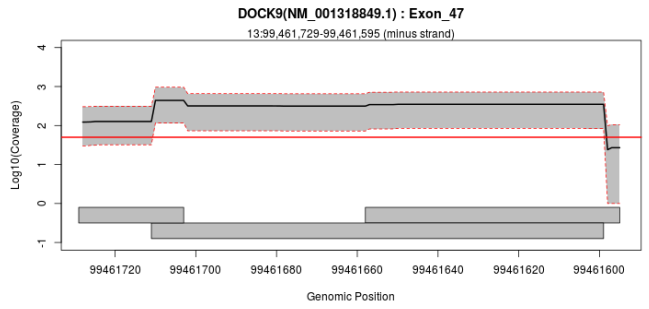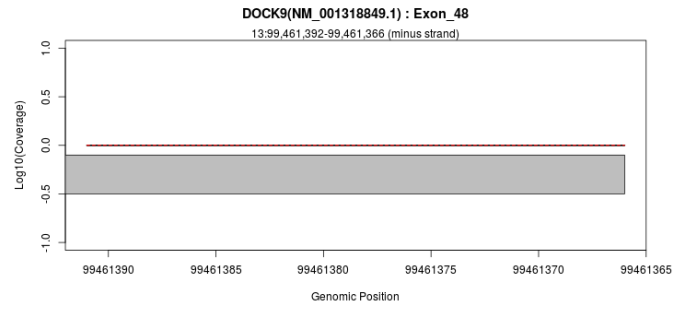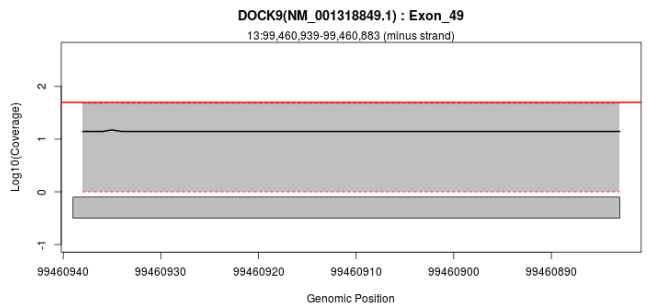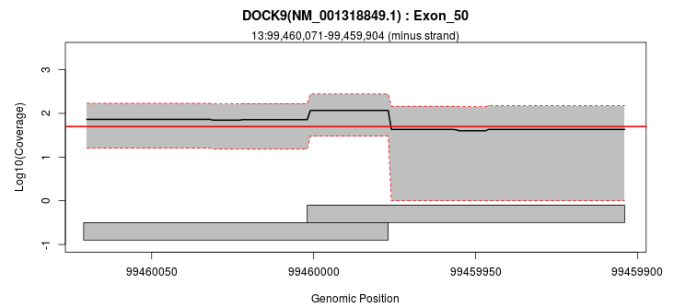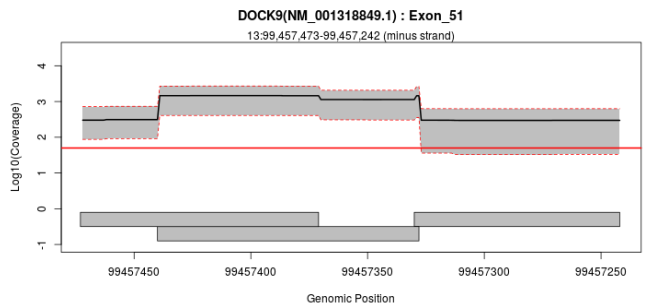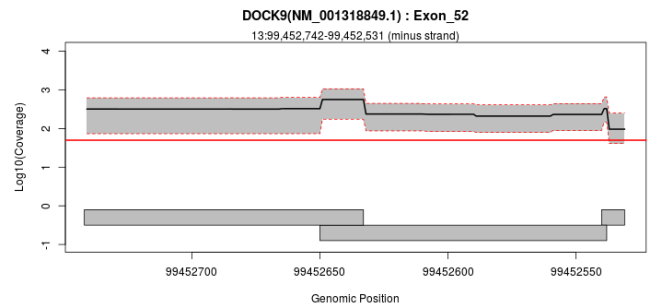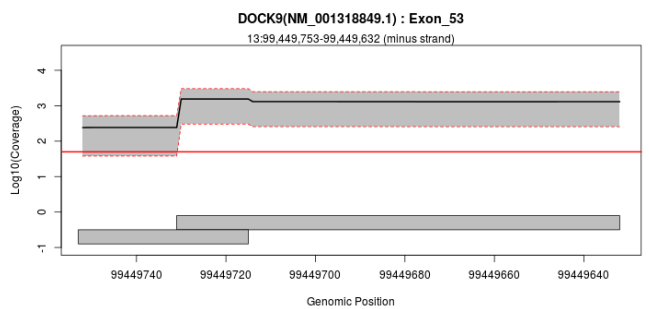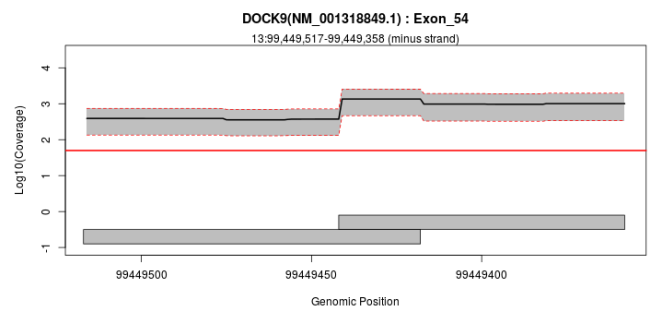

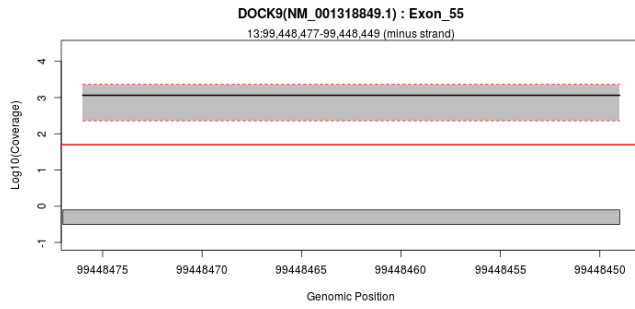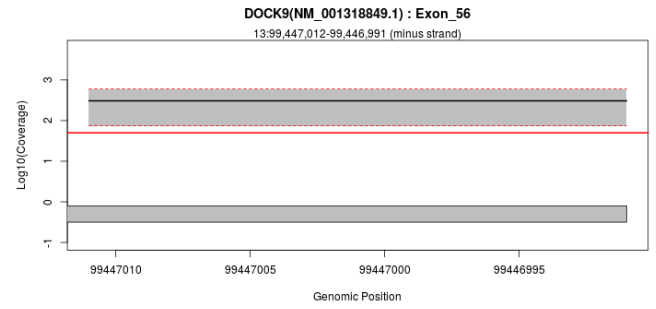

## Exon Overview: DOCK9 : NM\_015296.2

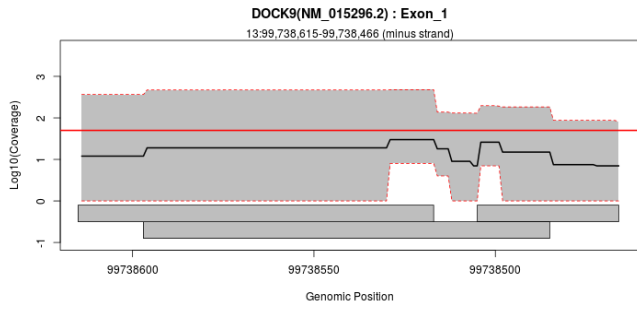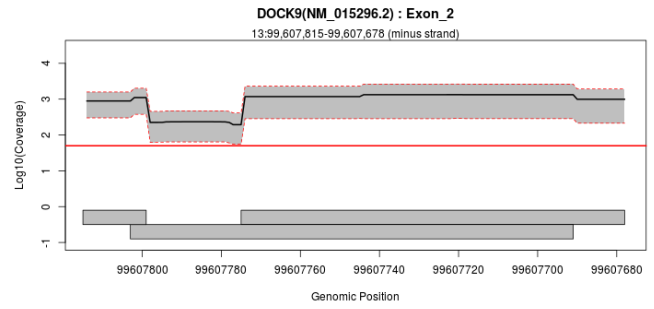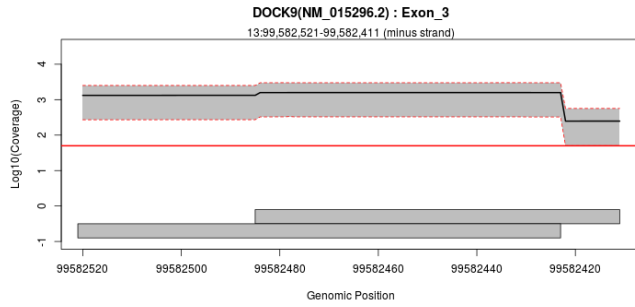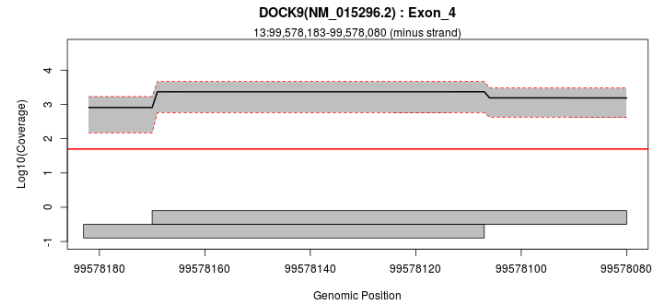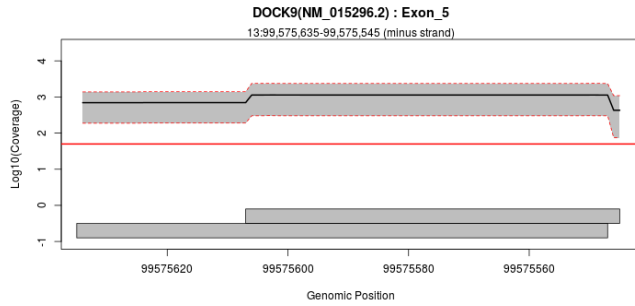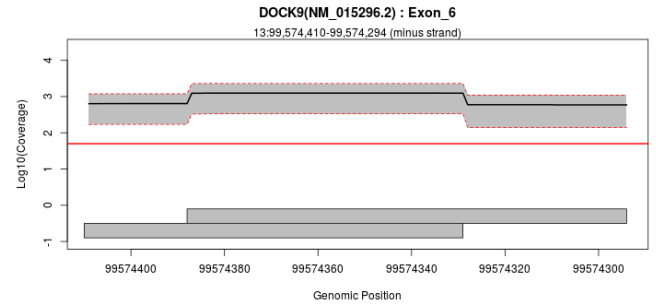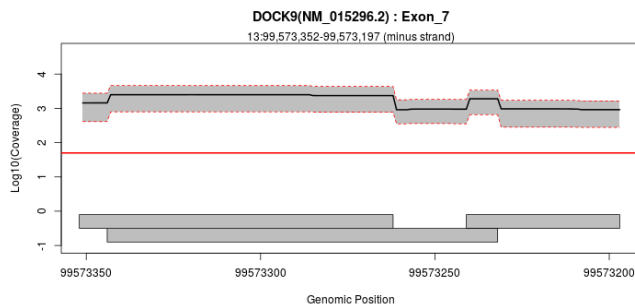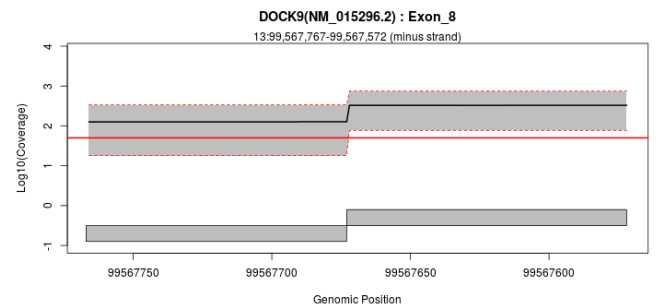

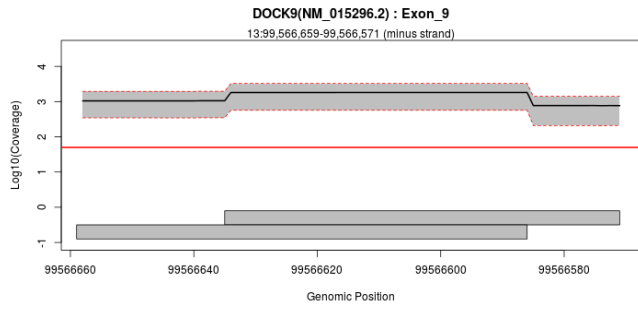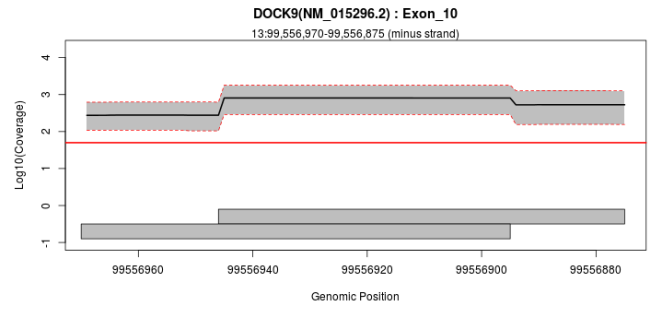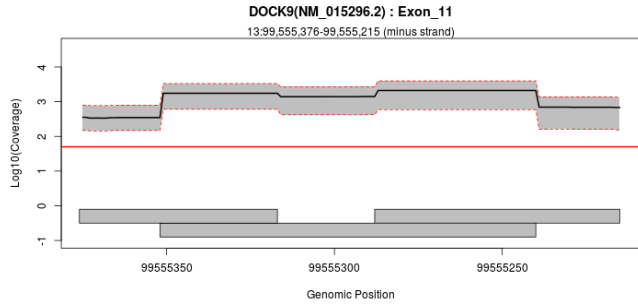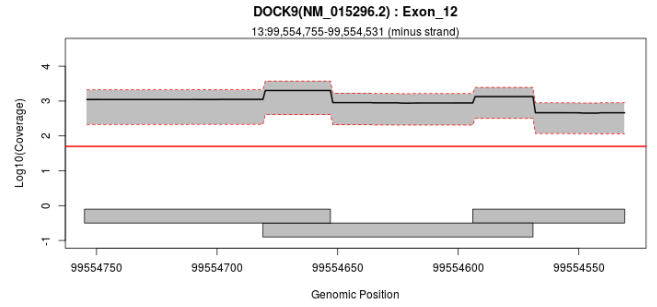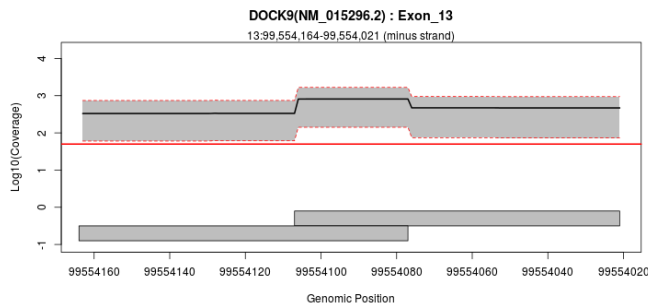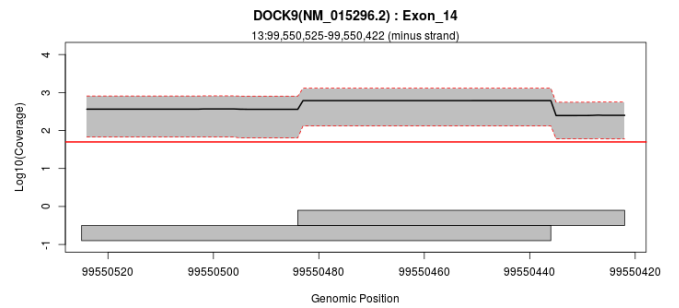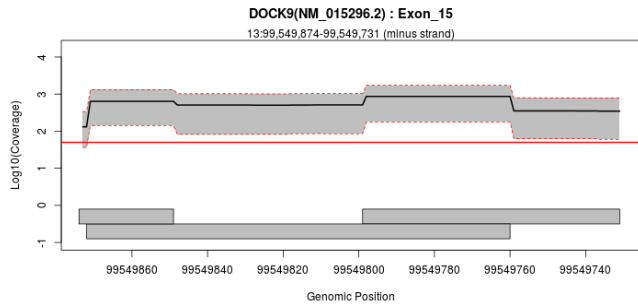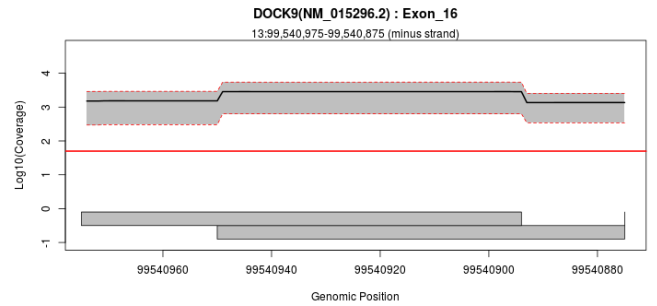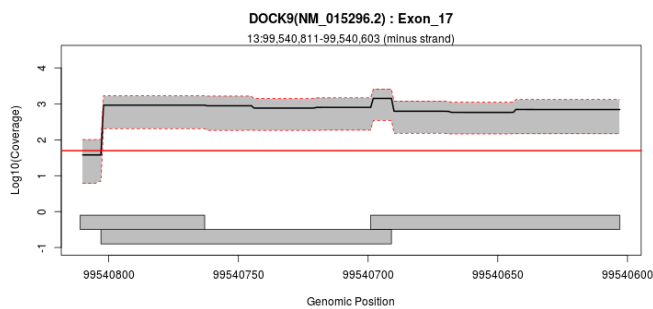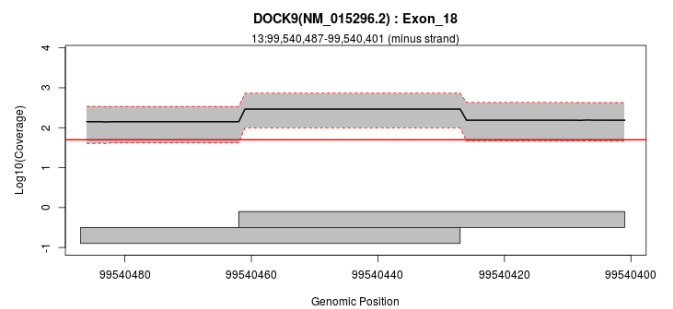

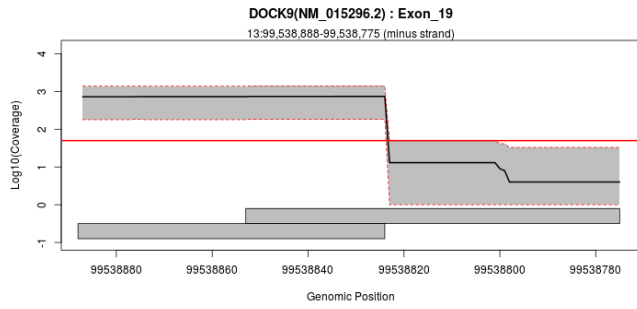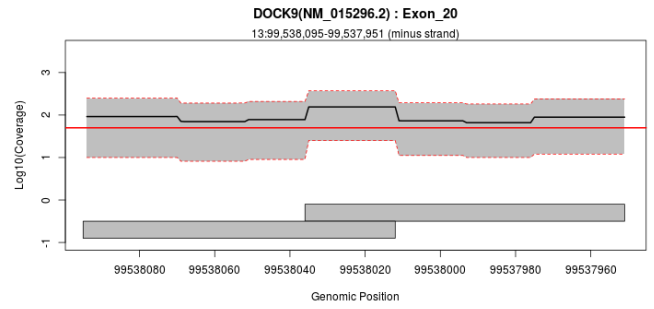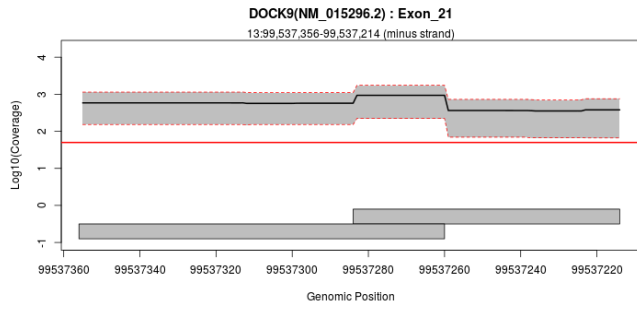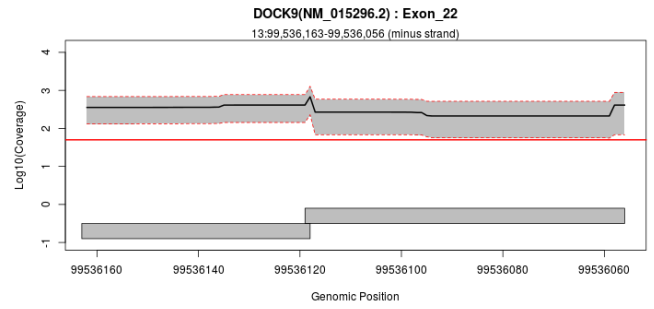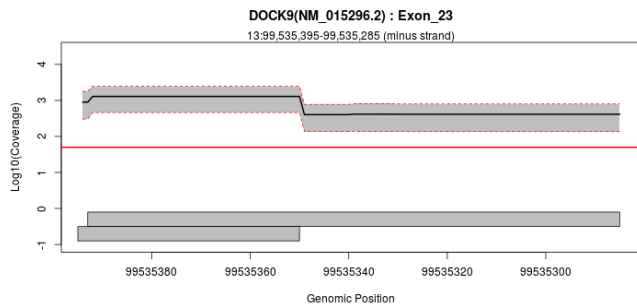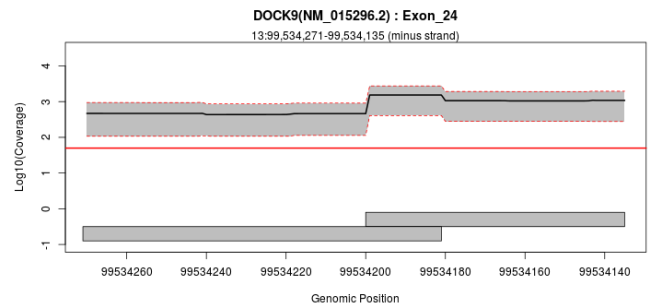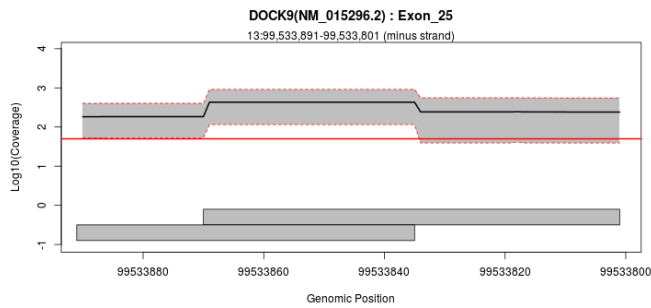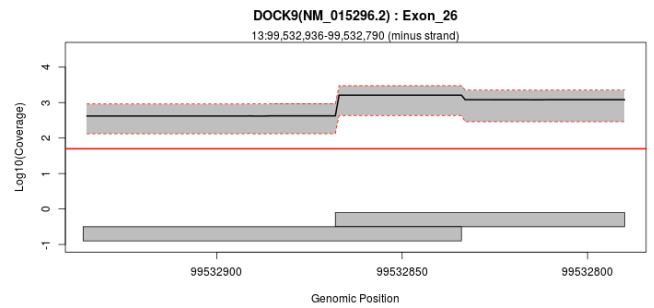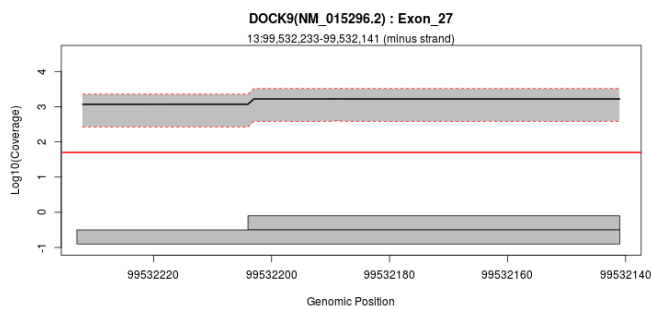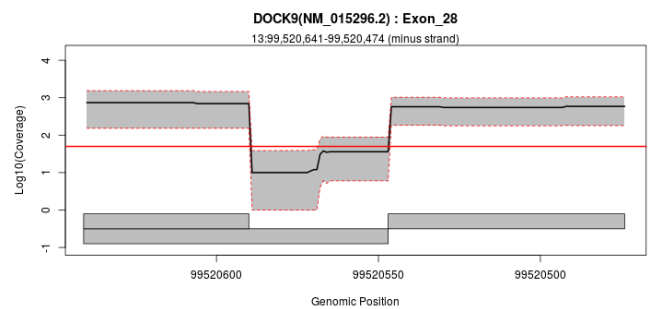

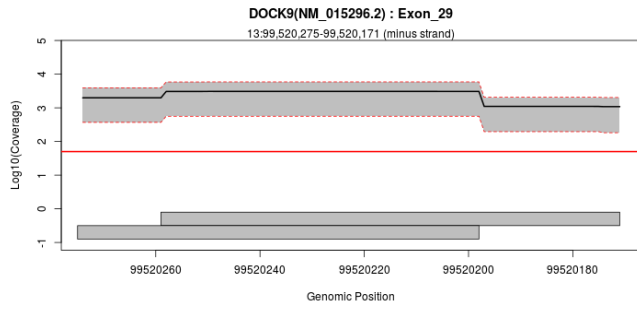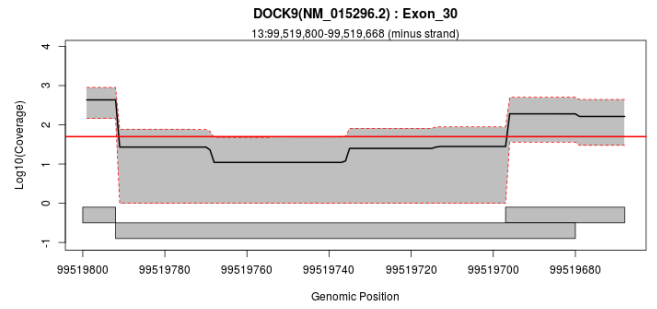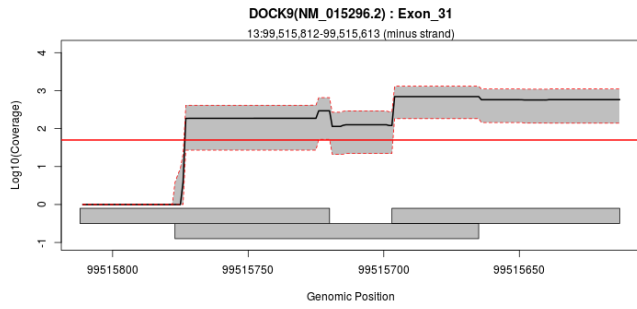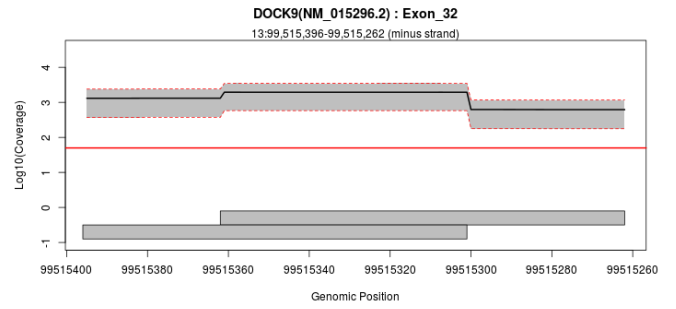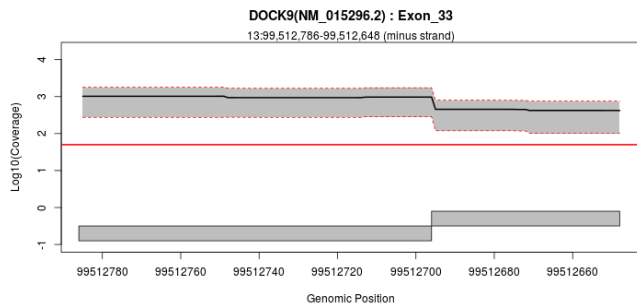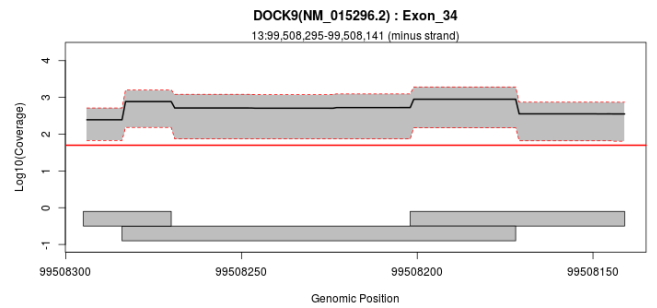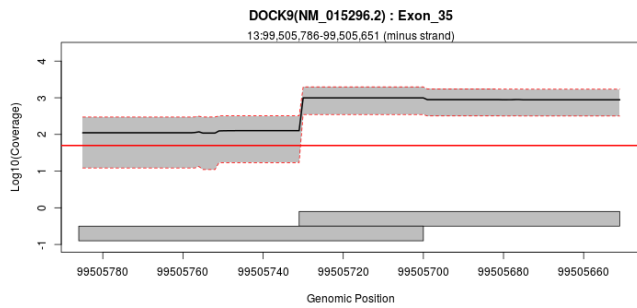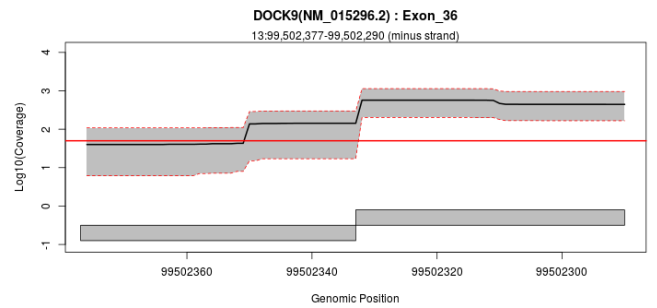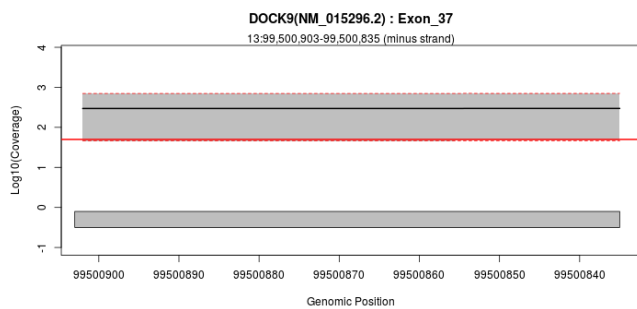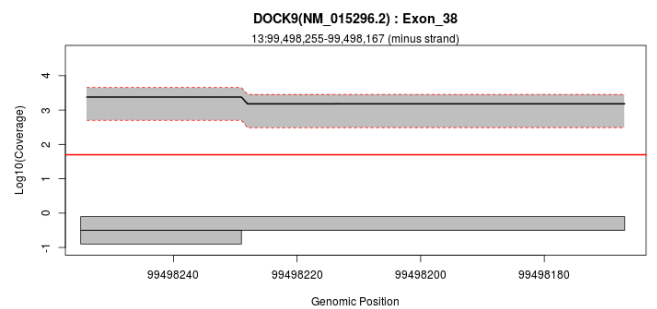

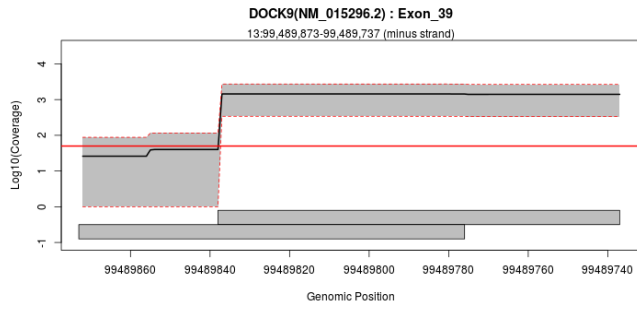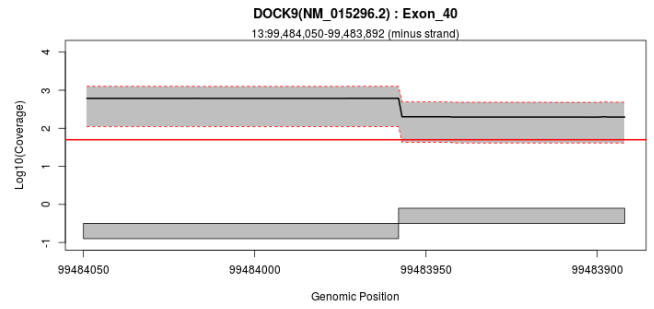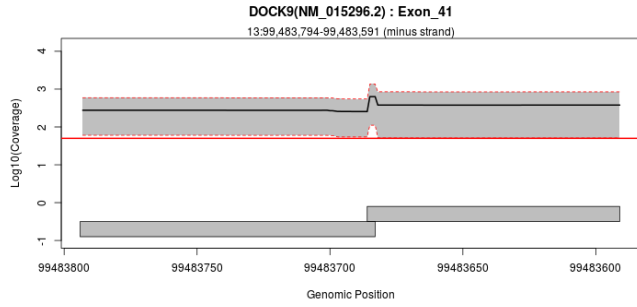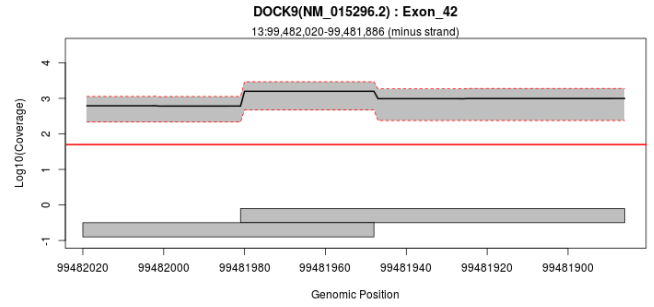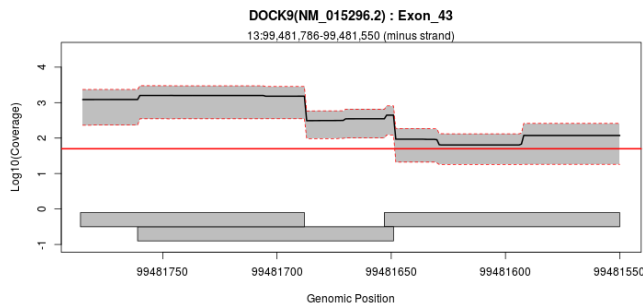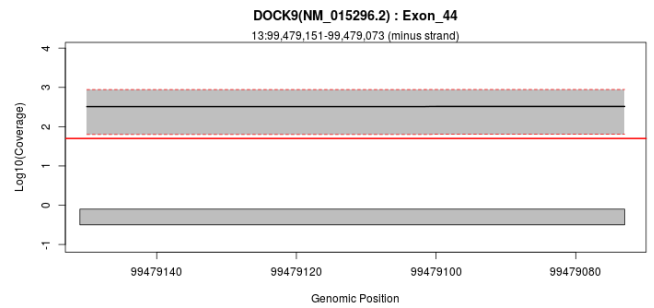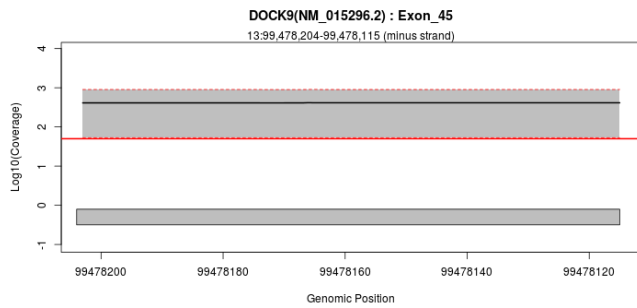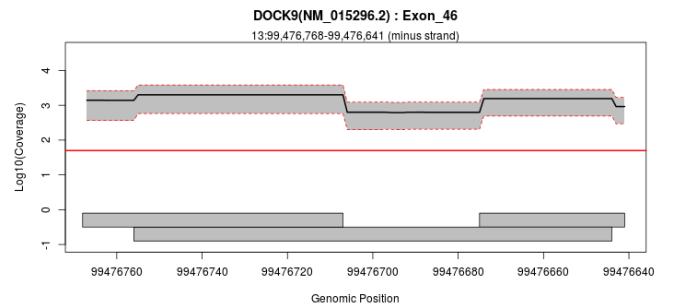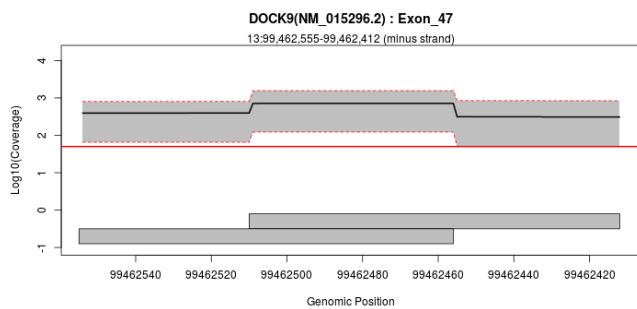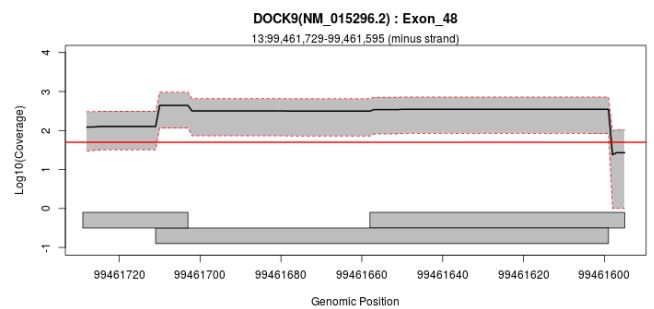



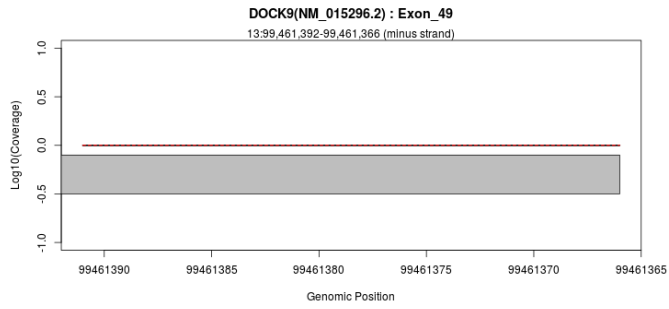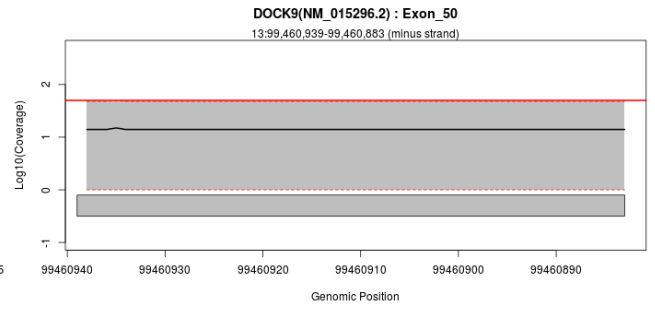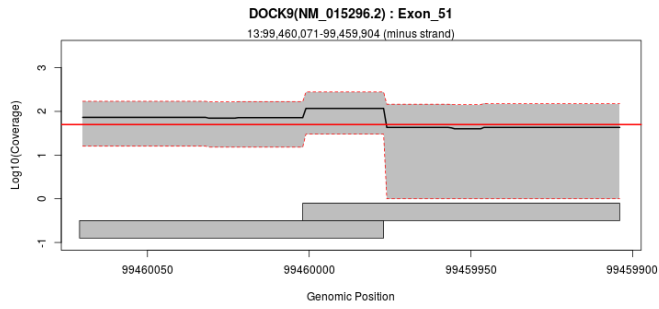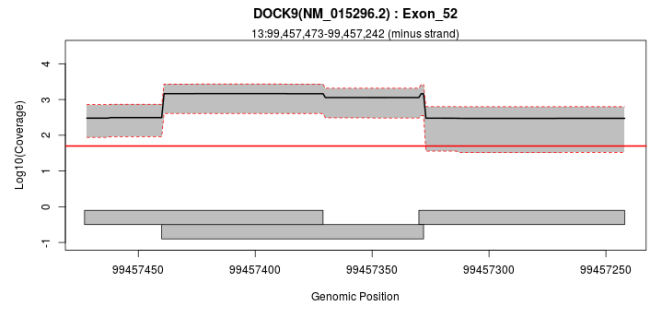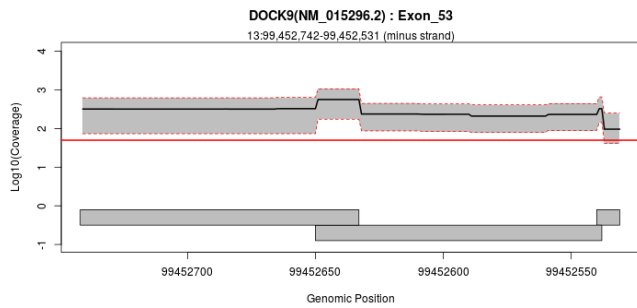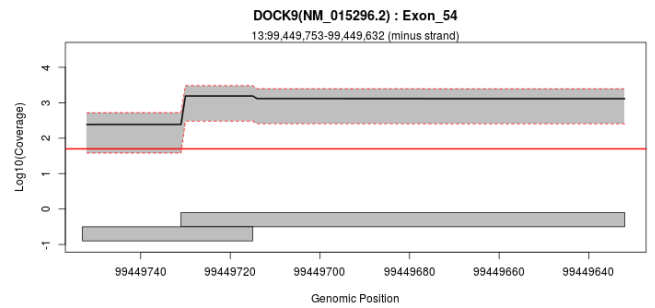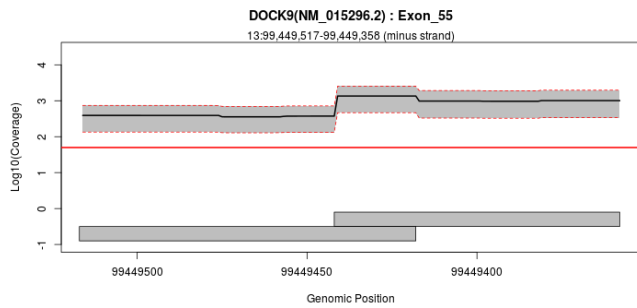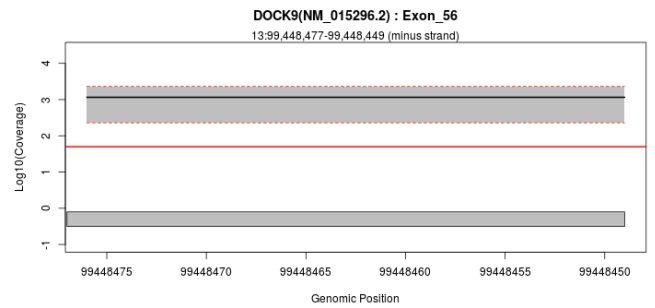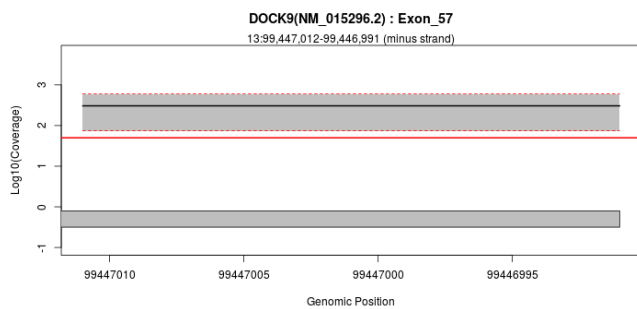

## Exon Overview: EPPK1 : NM\_031308.3

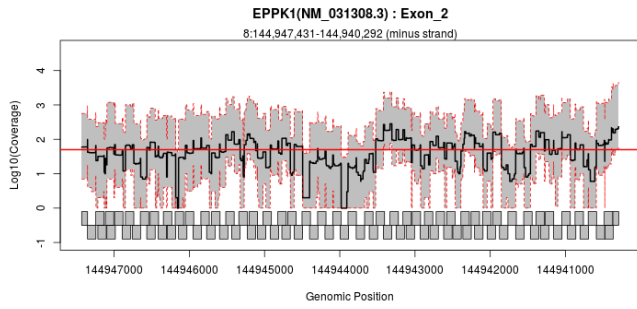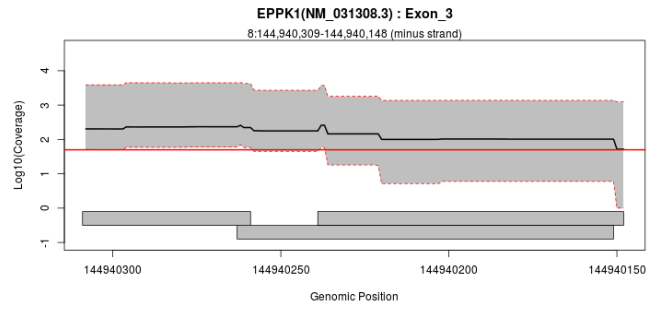

## Exon Overview: FASLG : NM\_000639.2

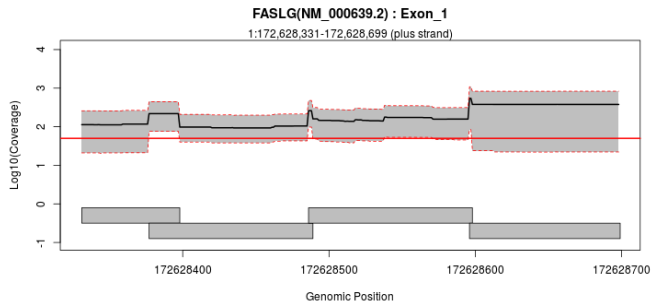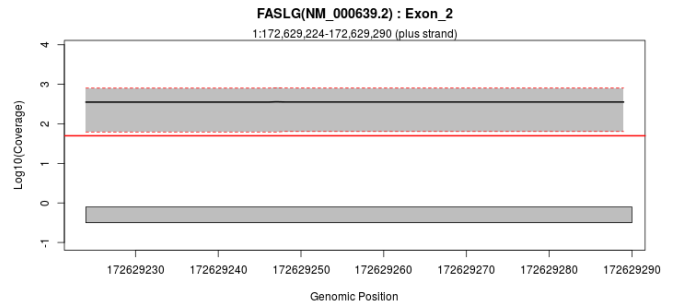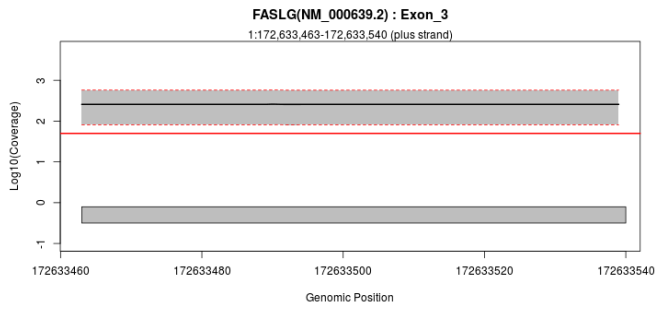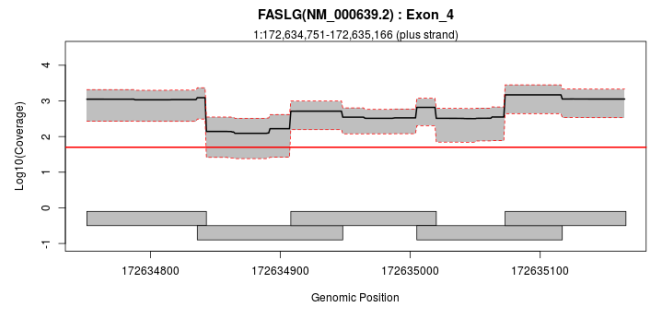

## Exon Overview: FASLG : NM\_001302746.1

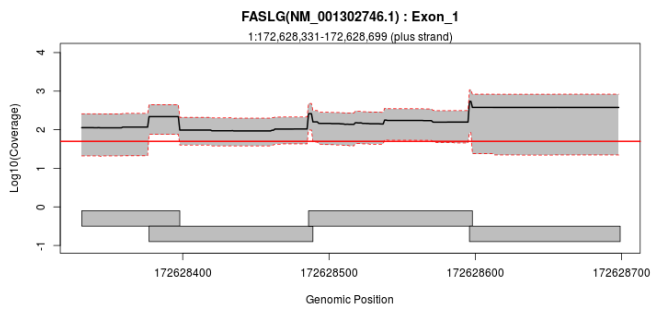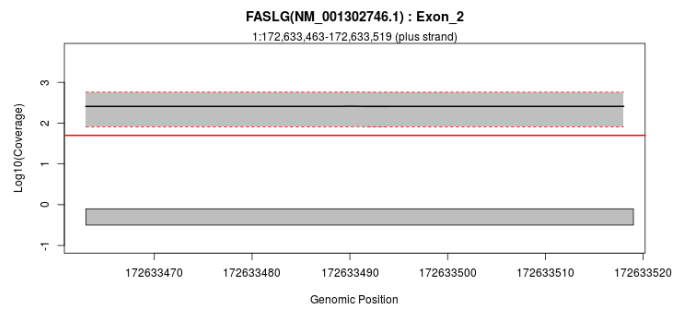

# Exon Overview: FNDC3B : NM\_001135095.1

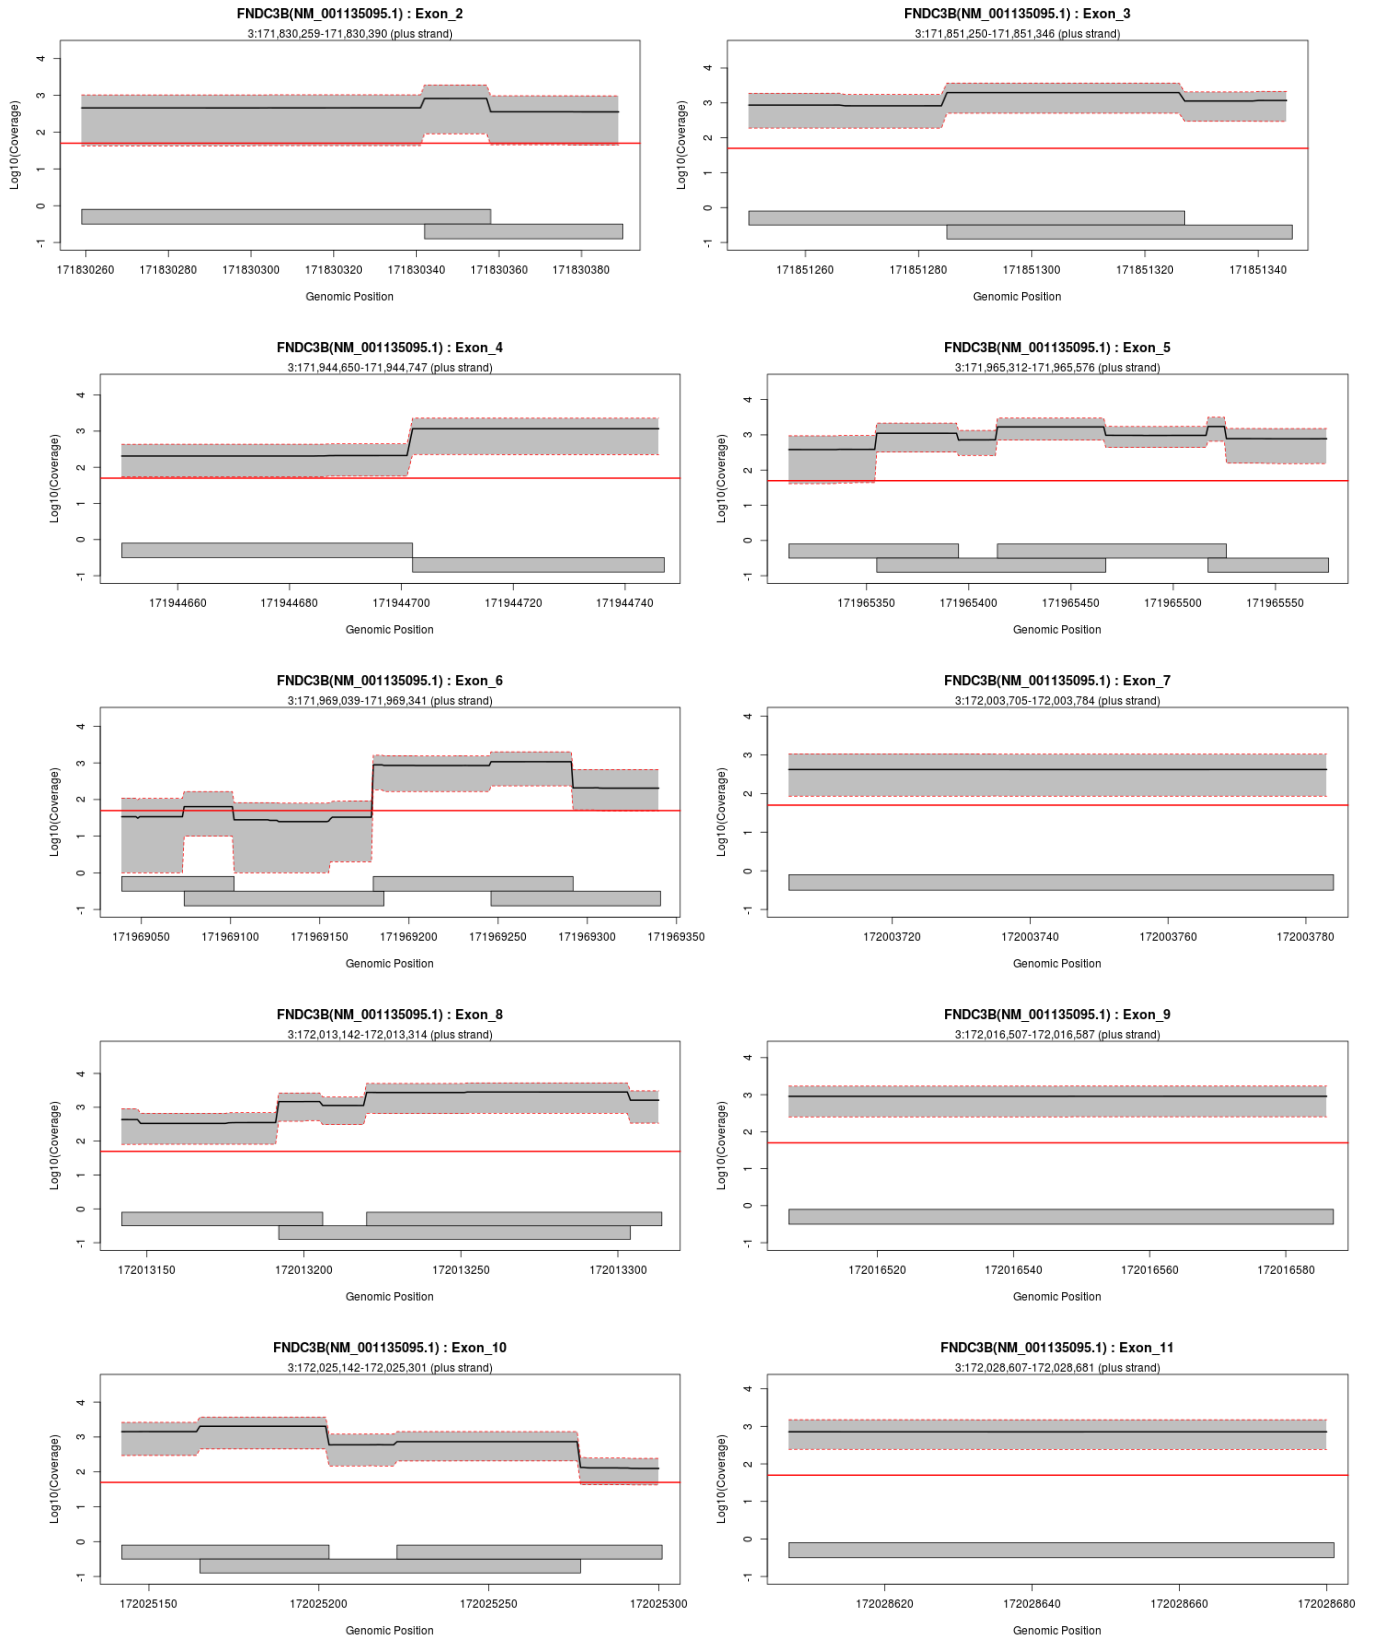

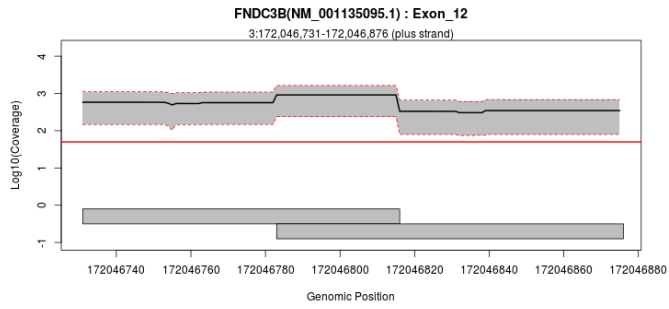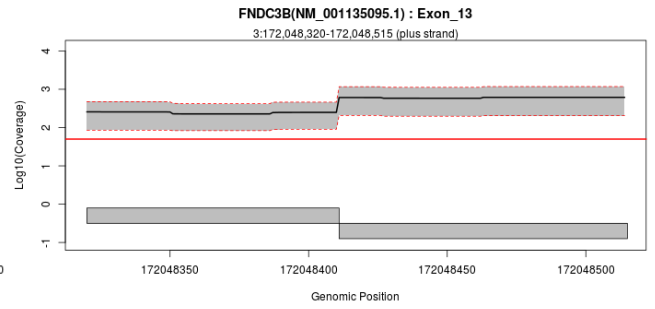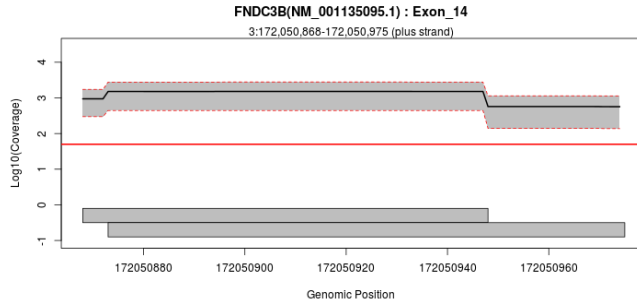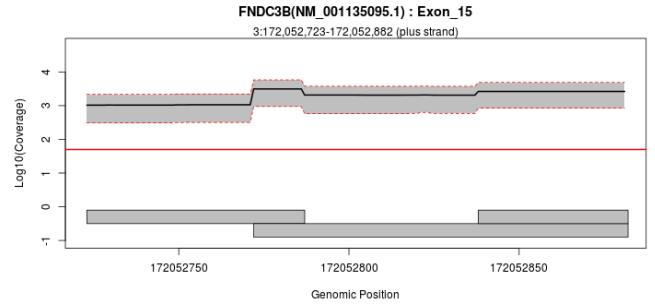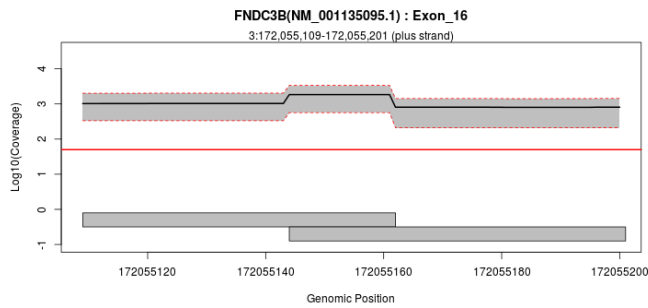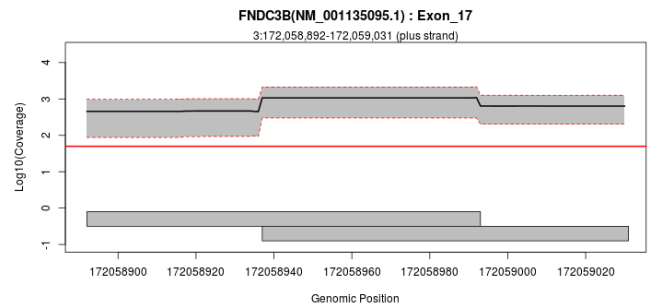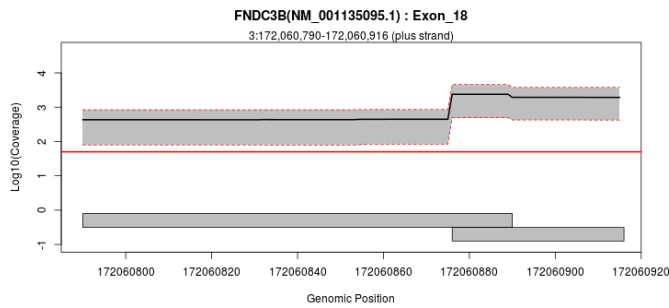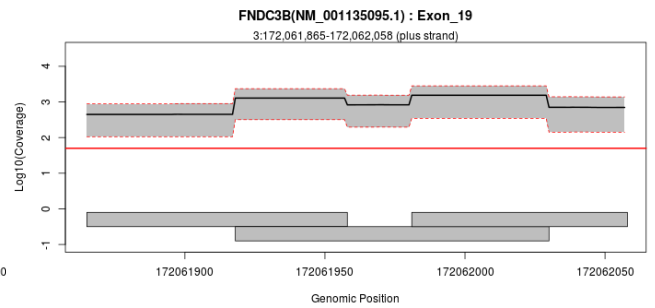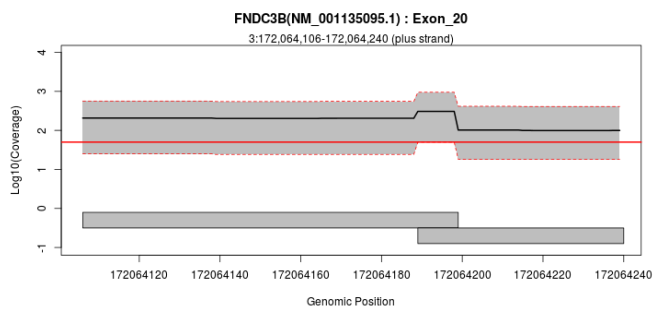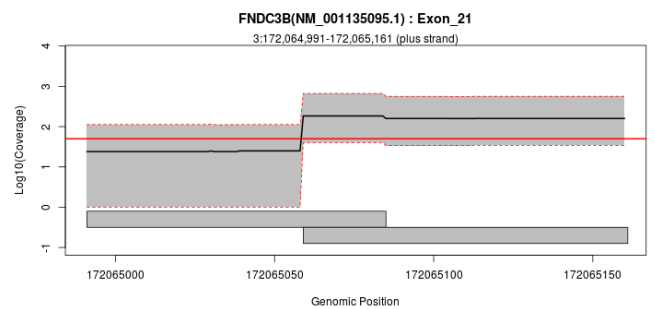

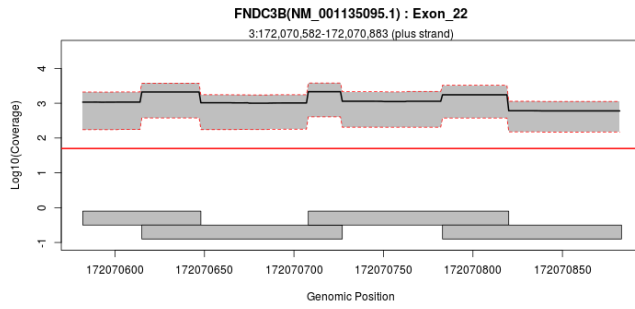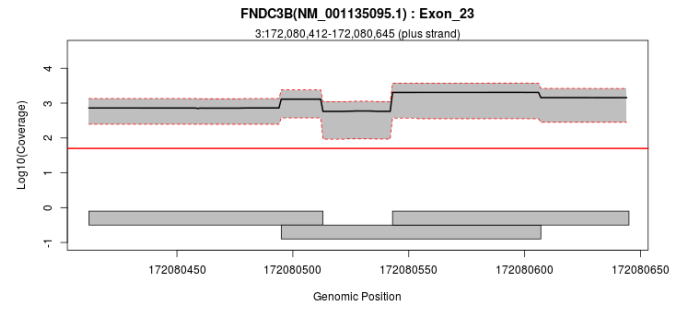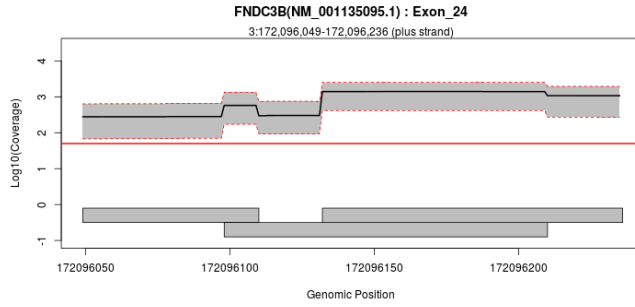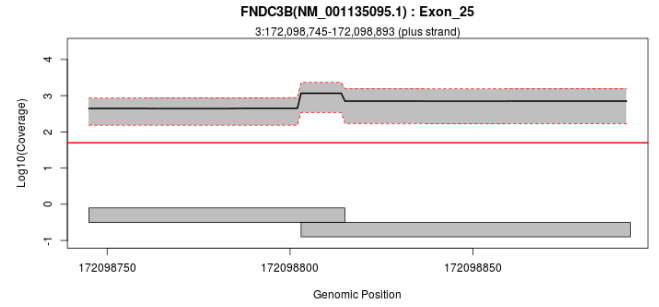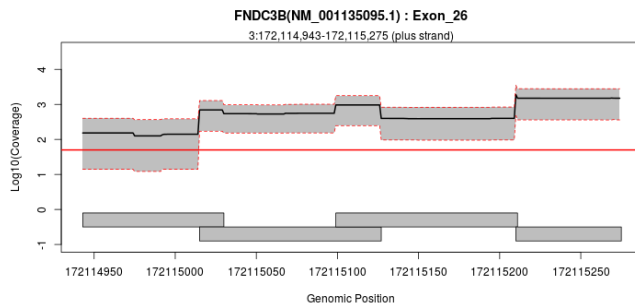

## Exon Overview: FNDC3B : NM\_022763.3

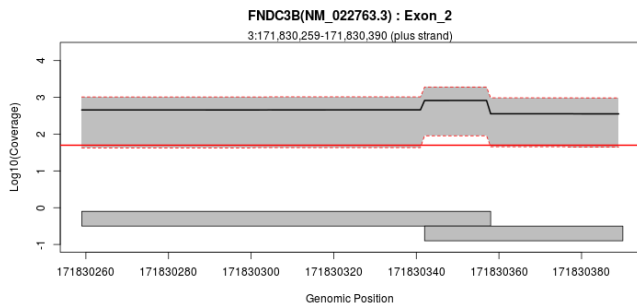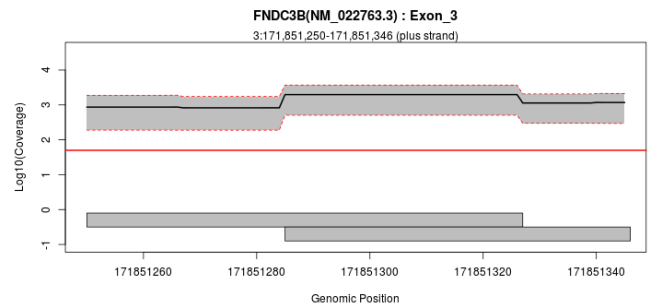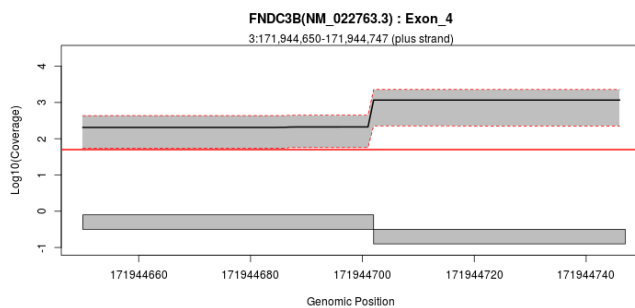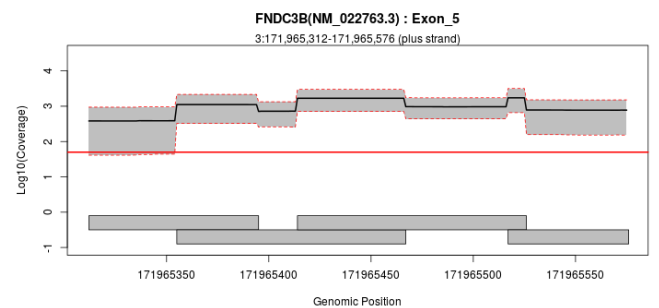

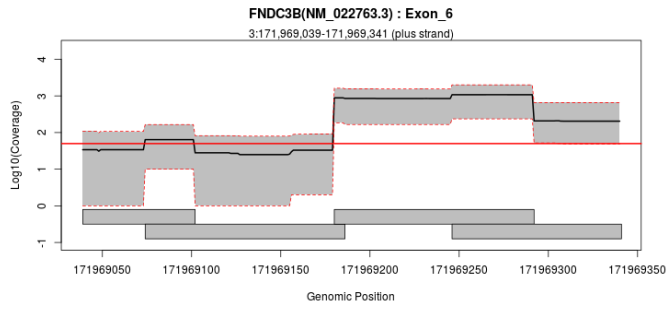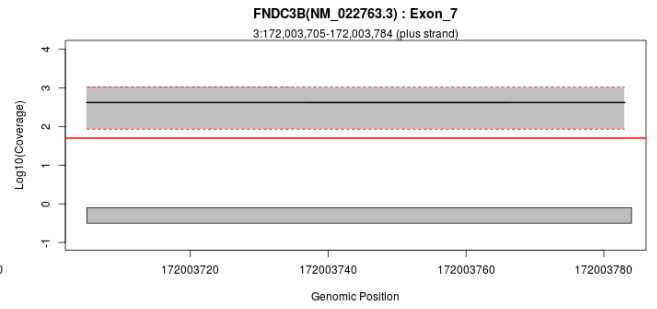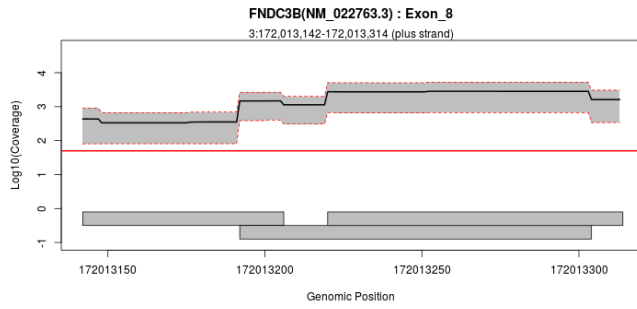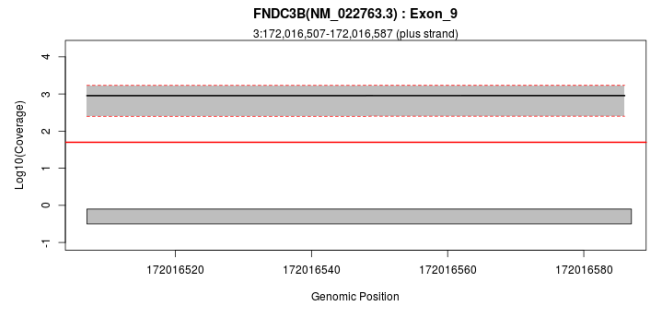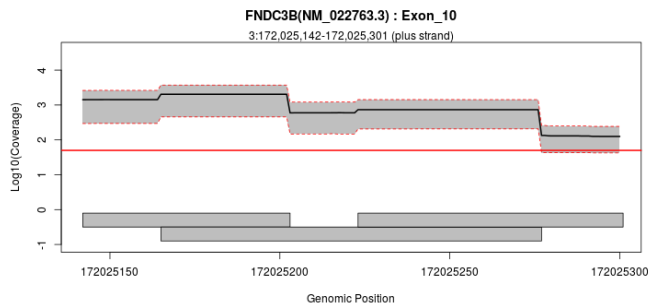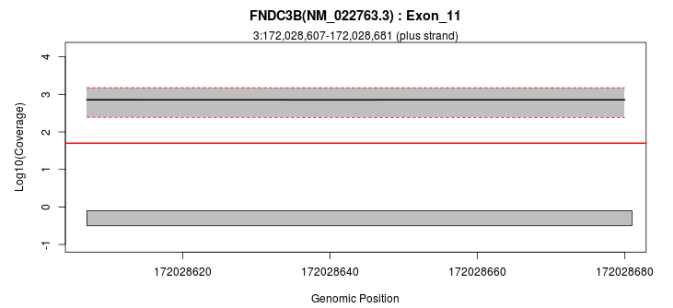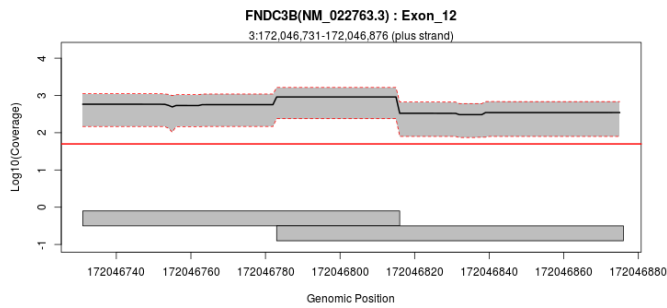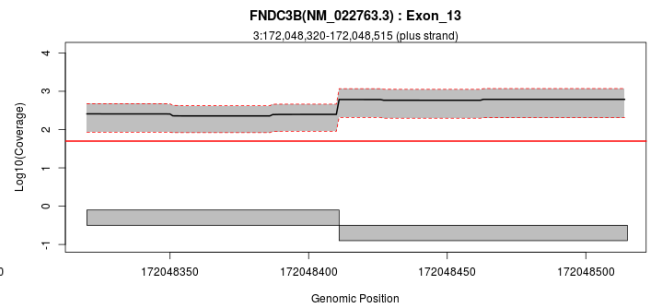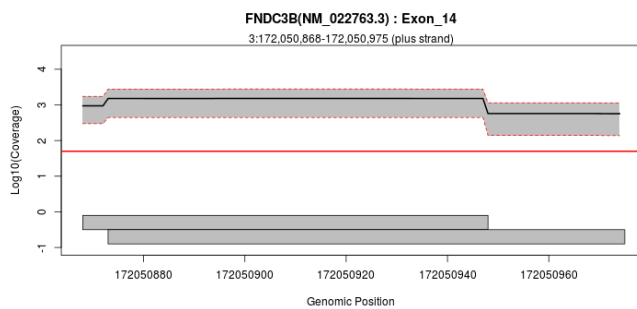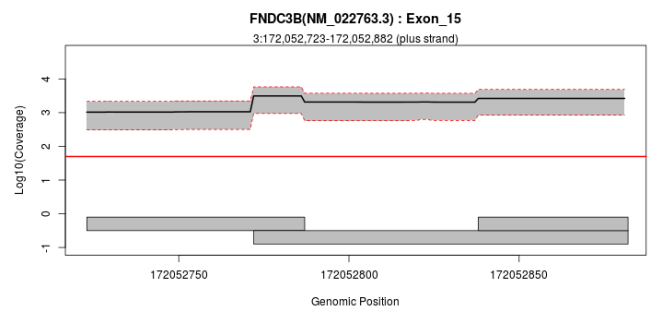

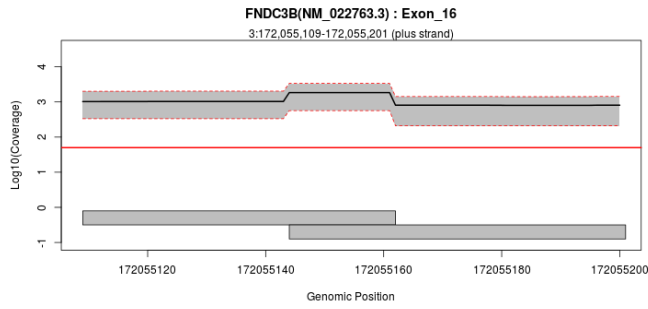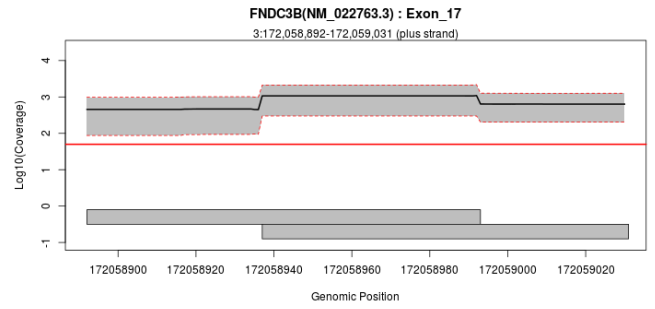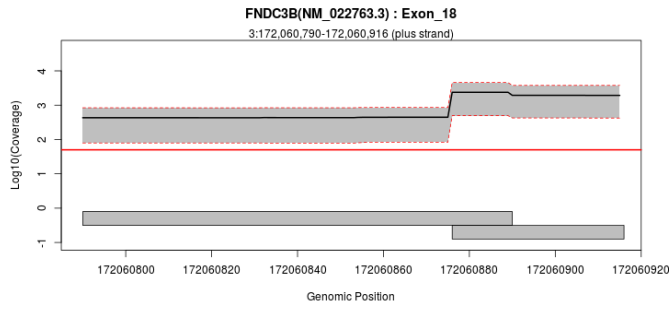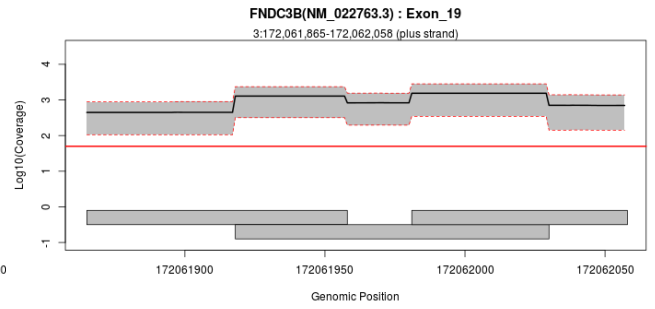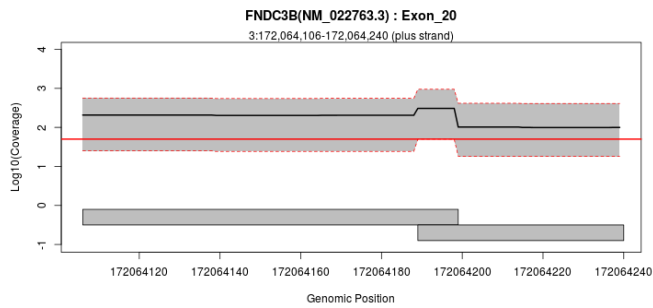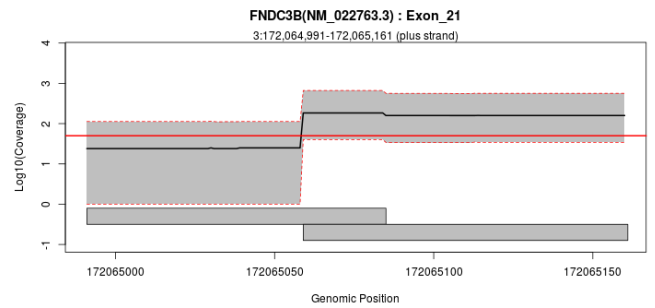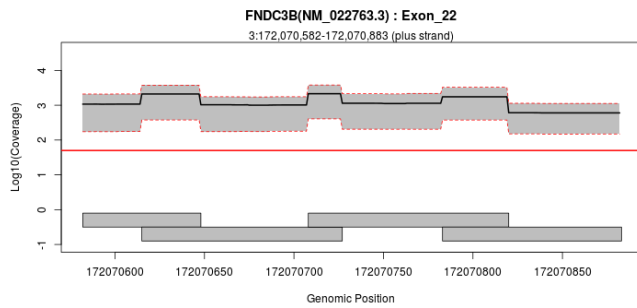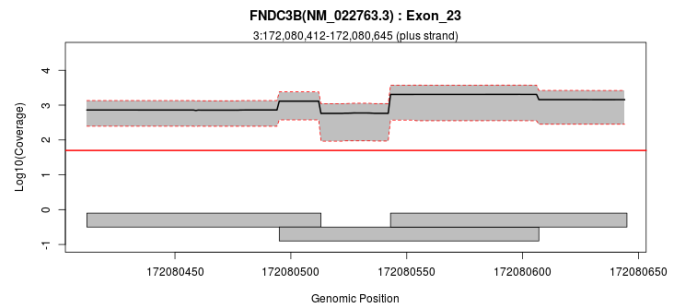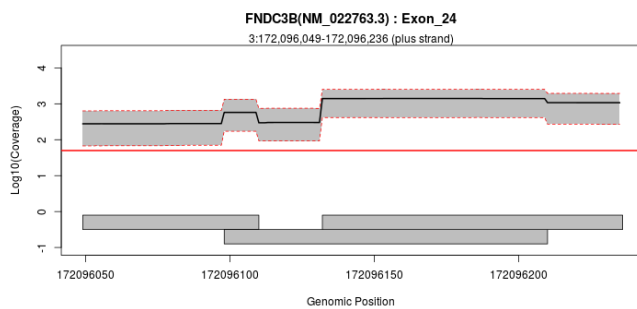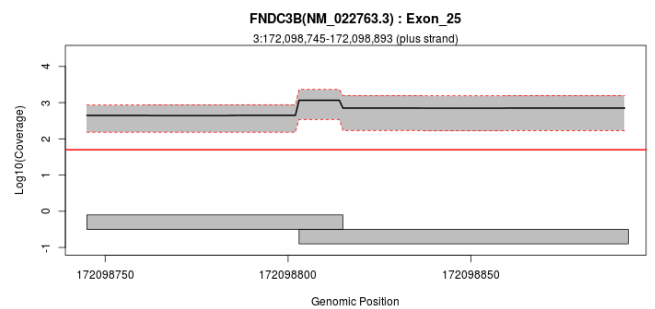

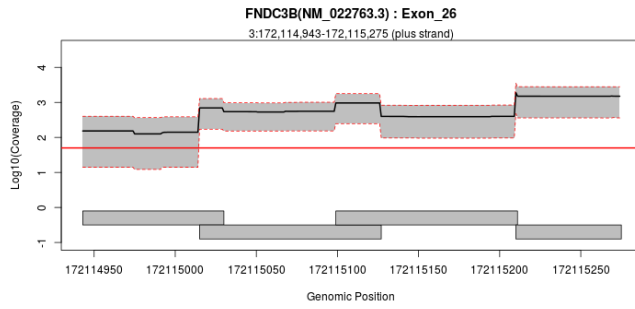

## Exon Overview: FOXO1 : NM\_002015.3

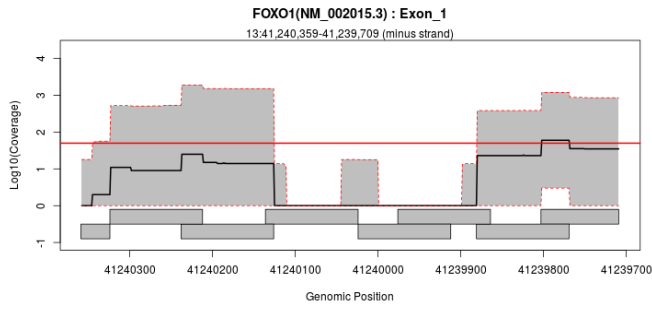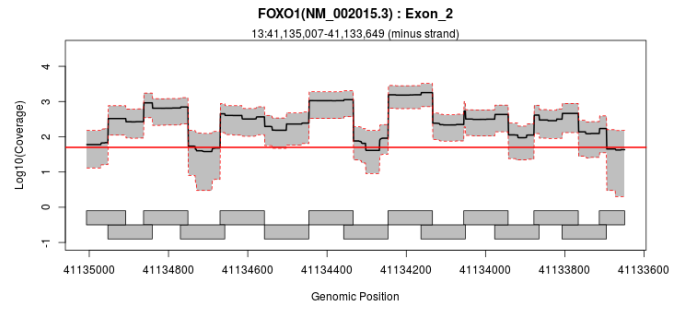

## Exon Overview: HLA-G : NM\_002127.5

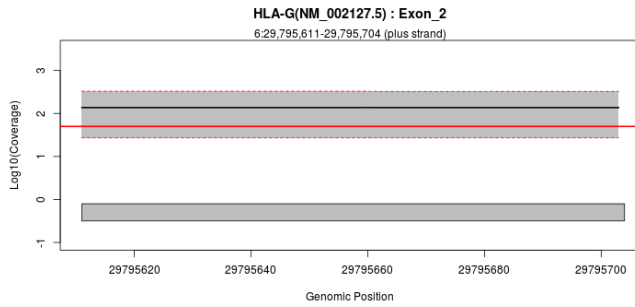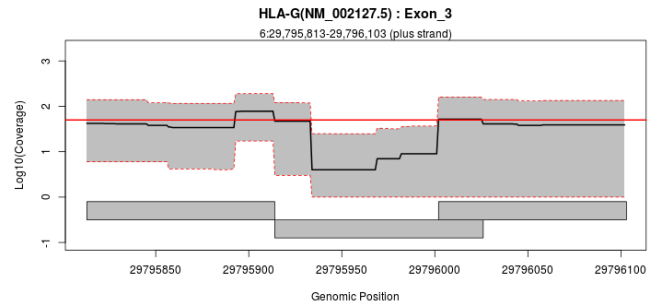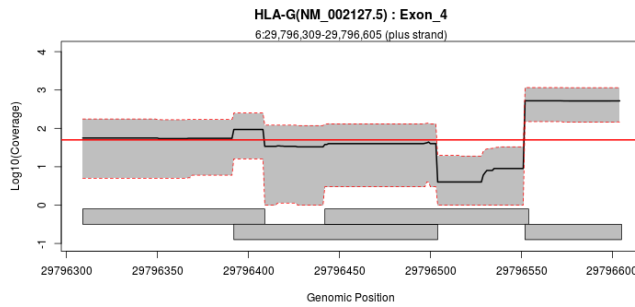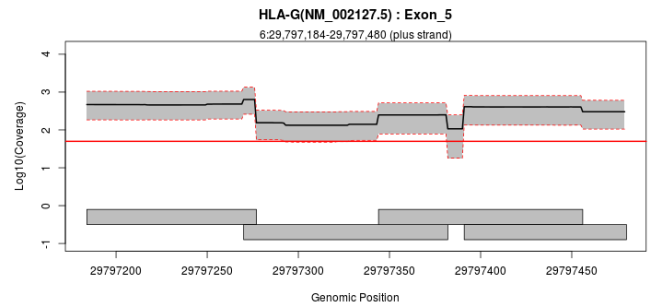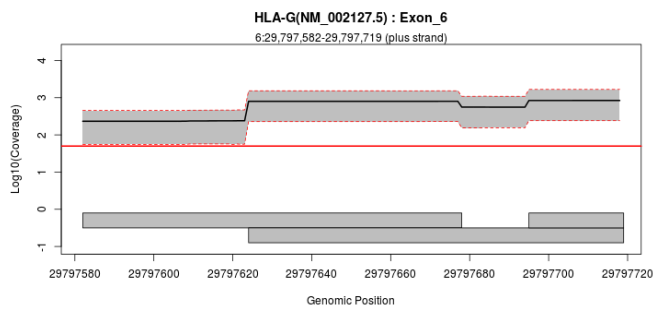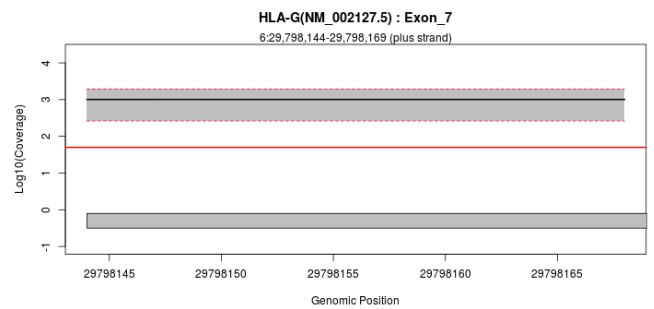



## Exon Overview: IL1RN : NM\_000577.4

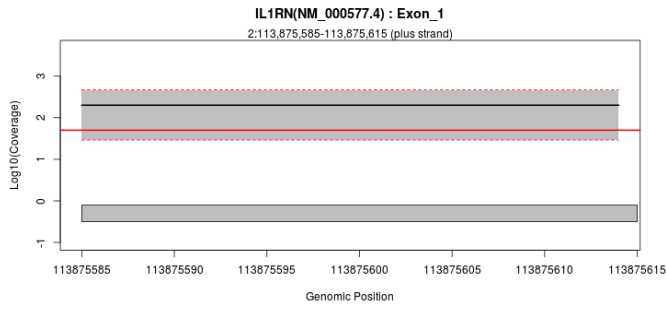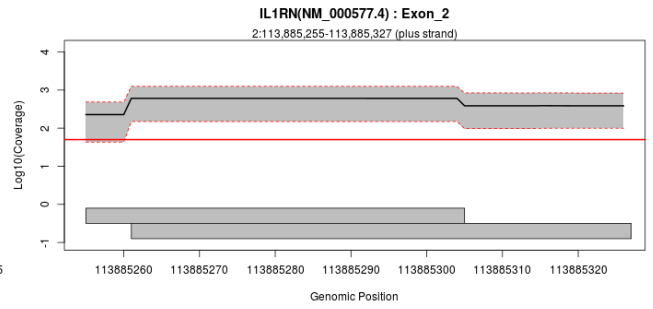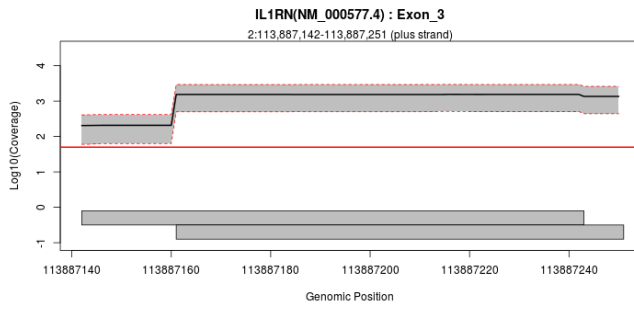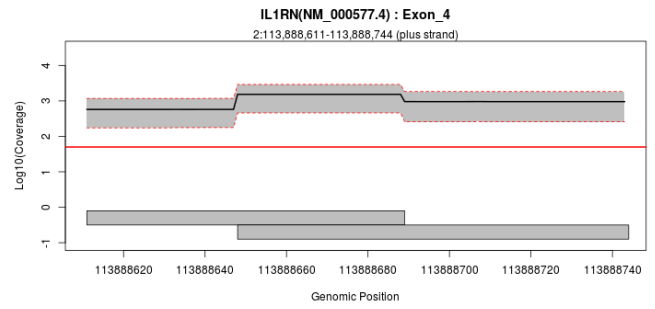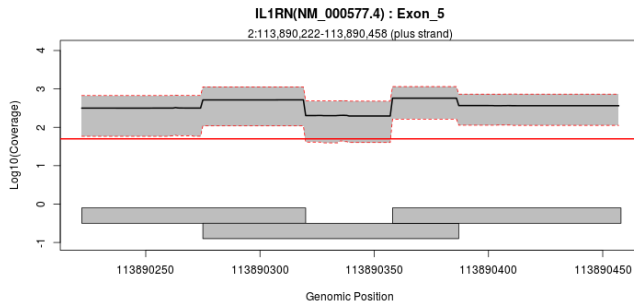

## Exon Overview: IL1RN : NM\_001318914.1

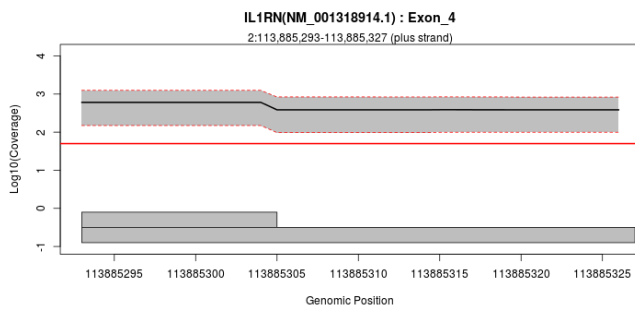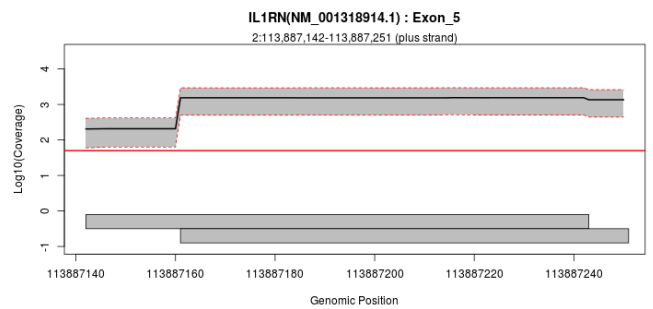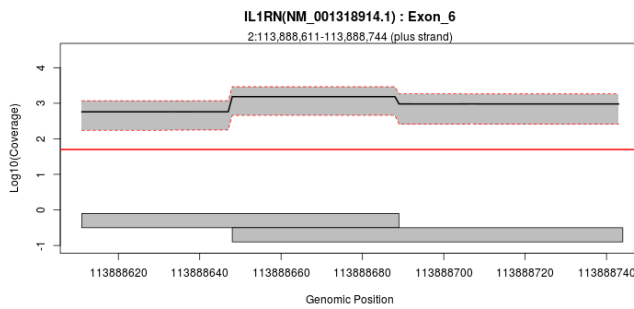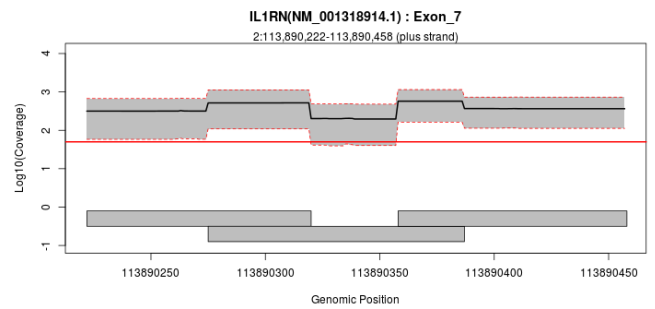

## Exon Overview: IL1RN : NM\_173841.2

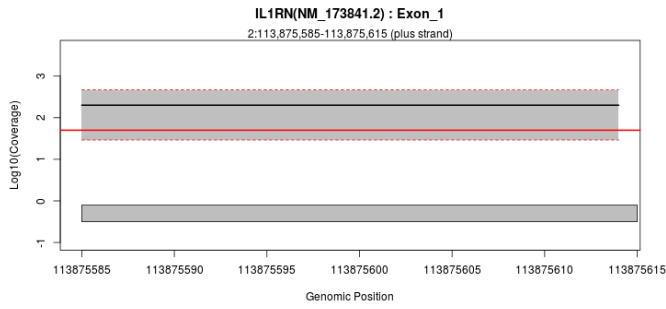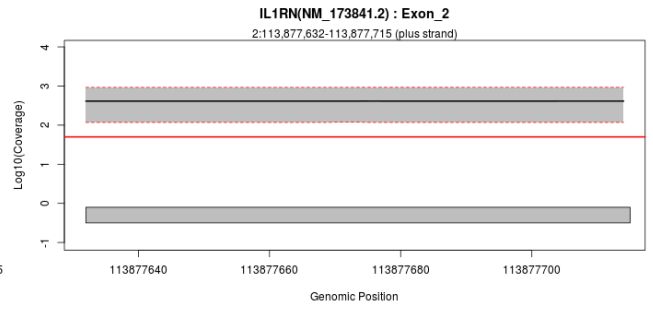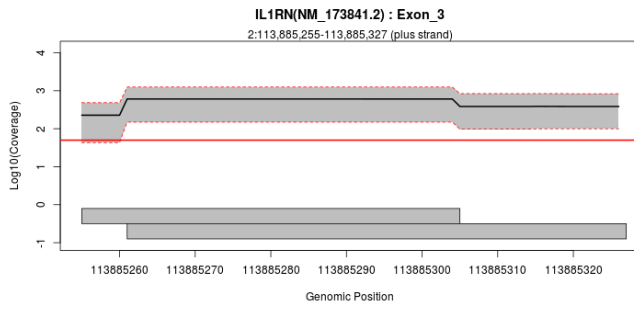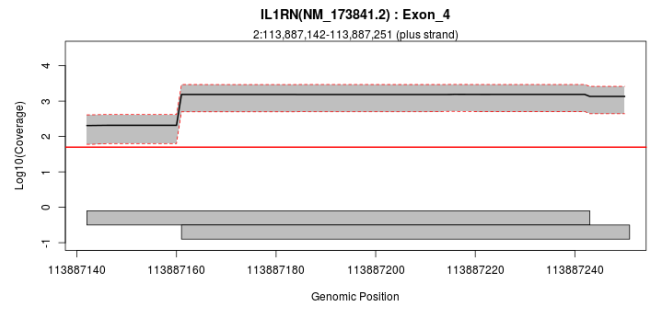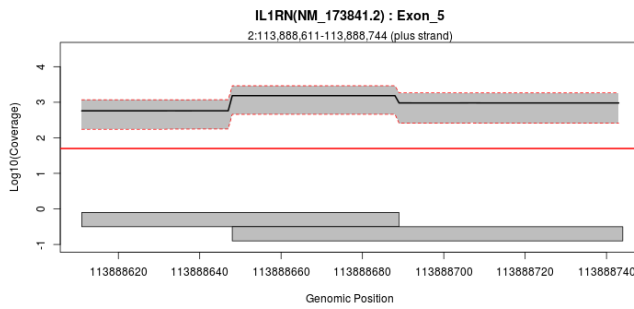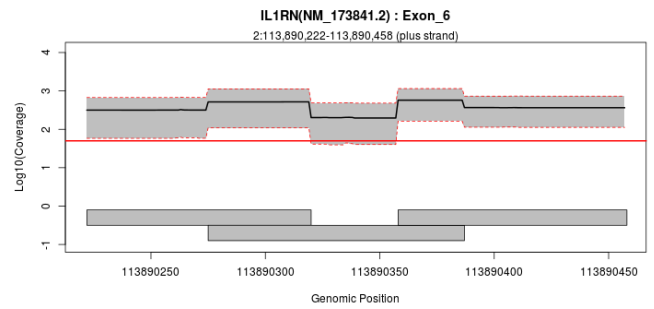

## Exon Overview: IL1RN : NM\_173842.2

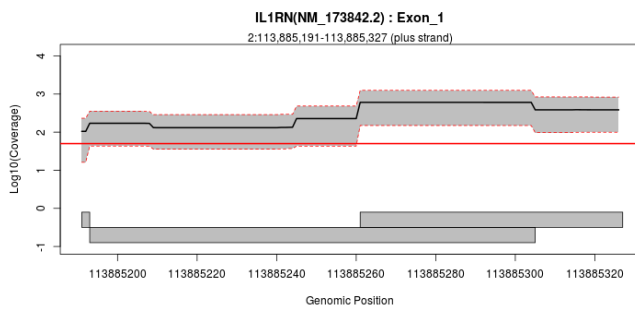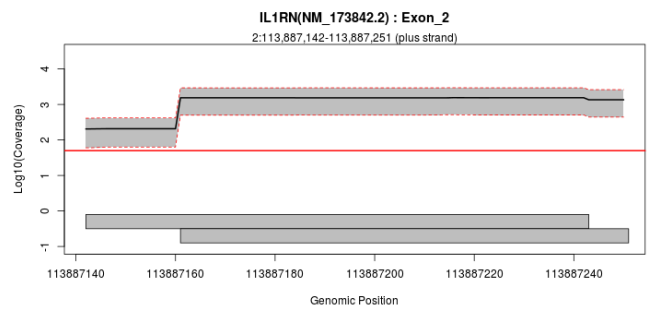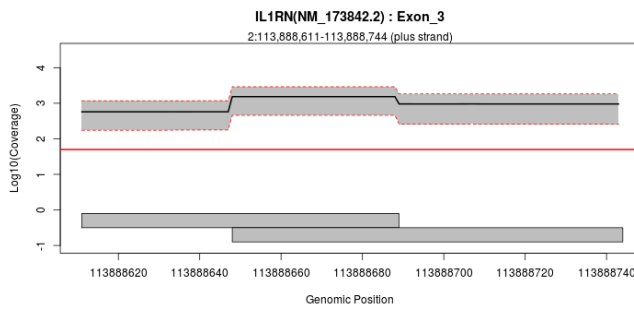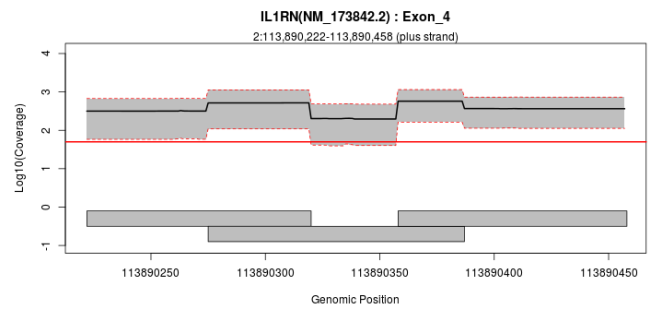

## Exon Overview: IL1RN : NM\_173843.2

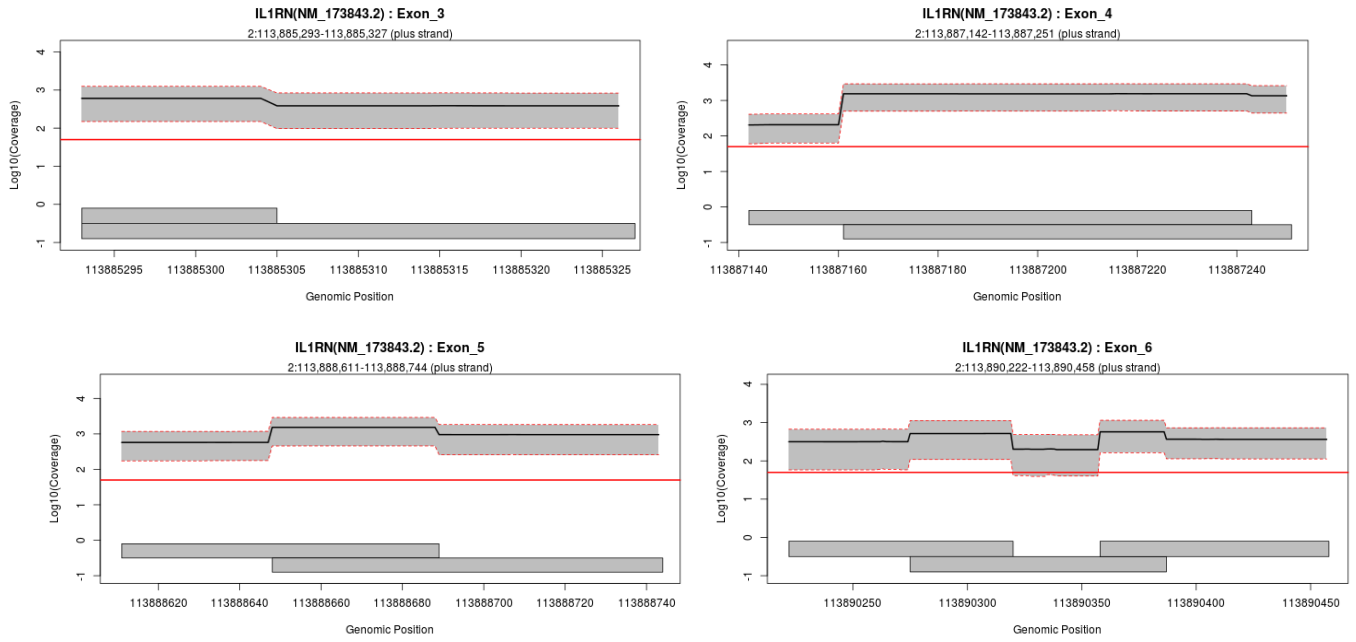

## Exon Overview: LAMC3 : NM\_006059.3

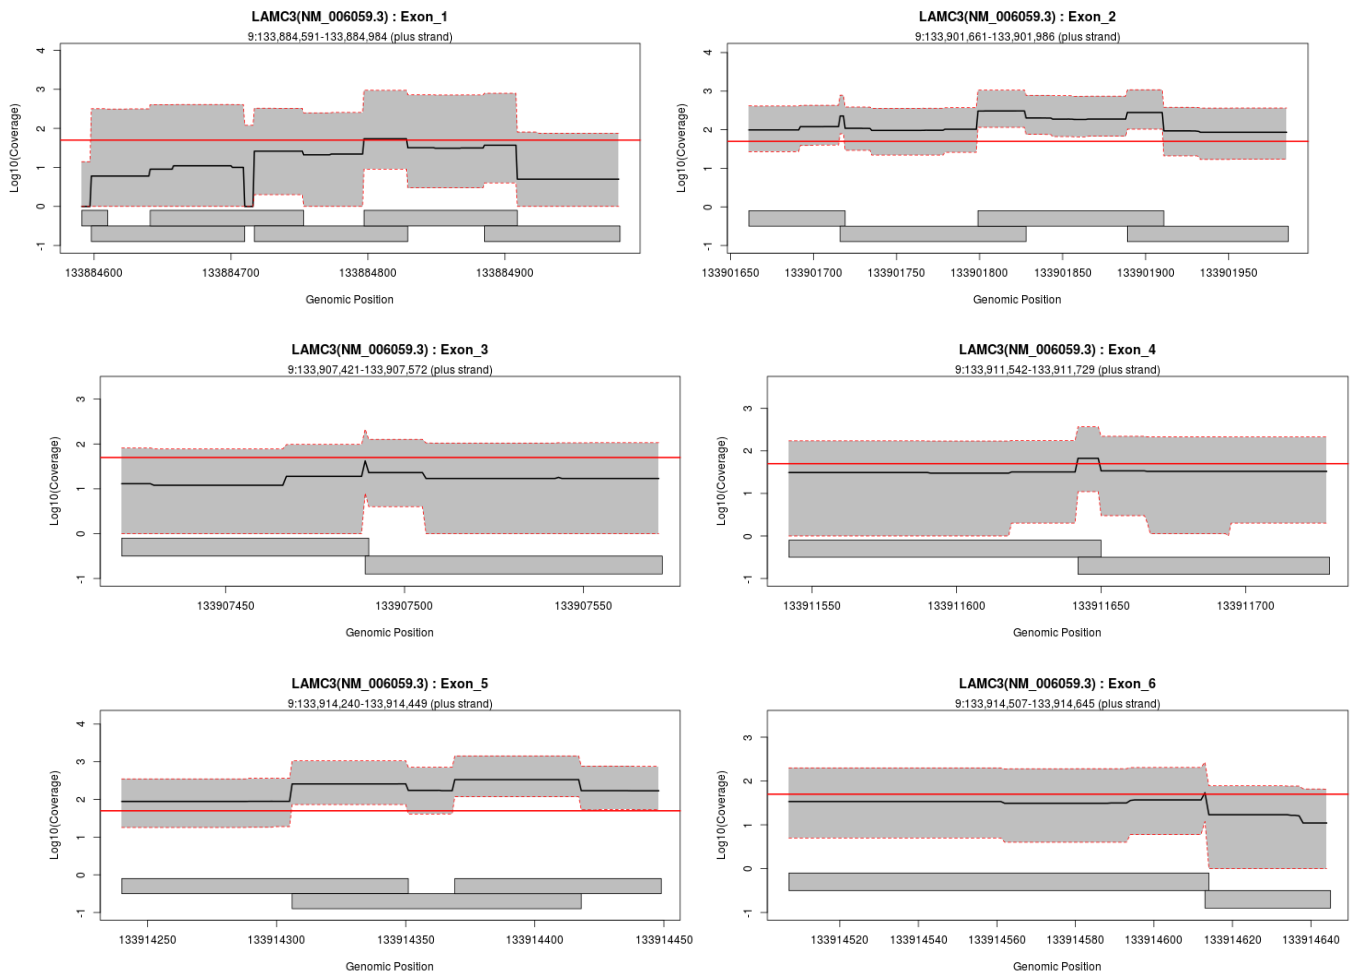

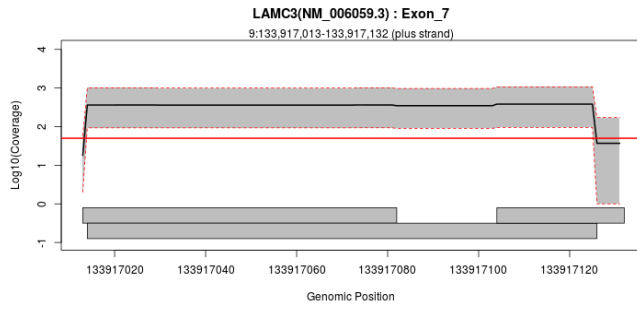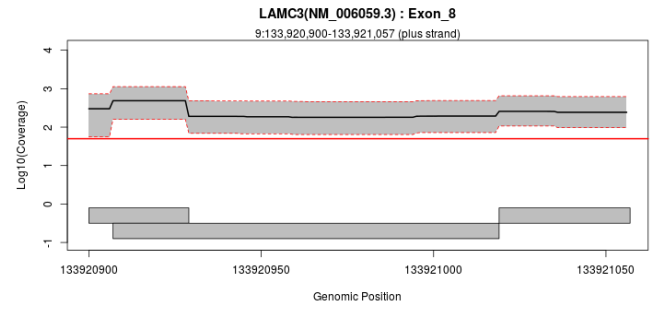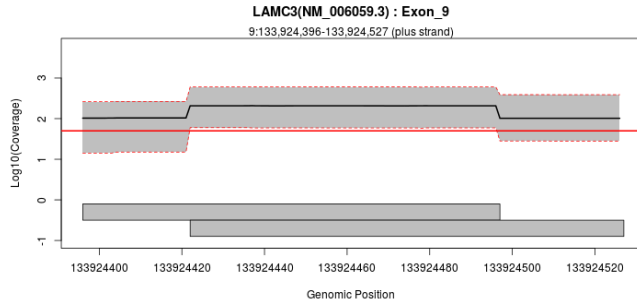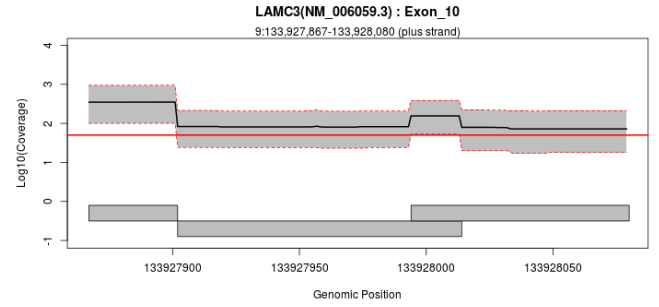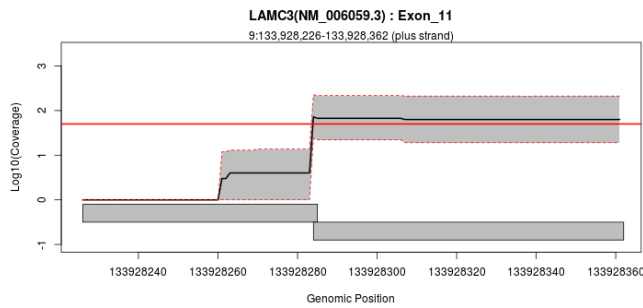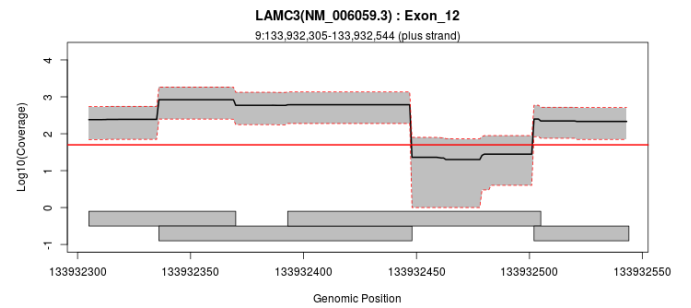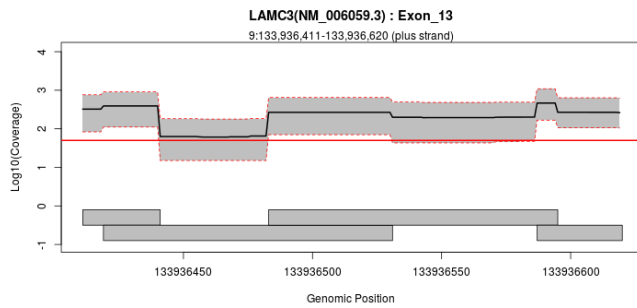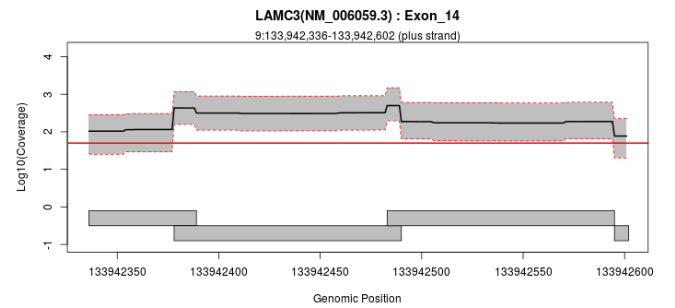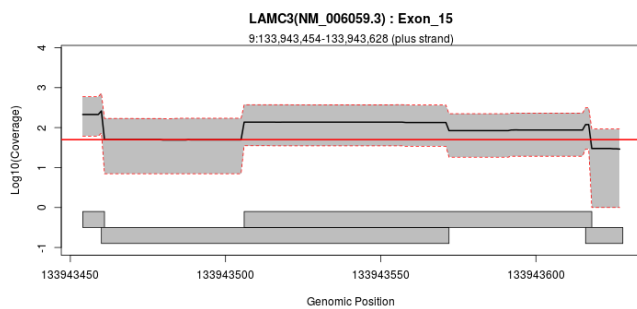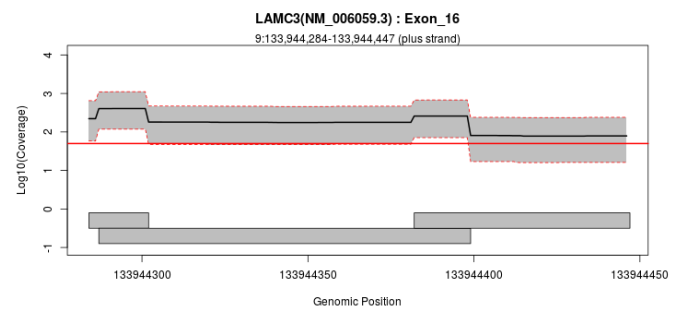

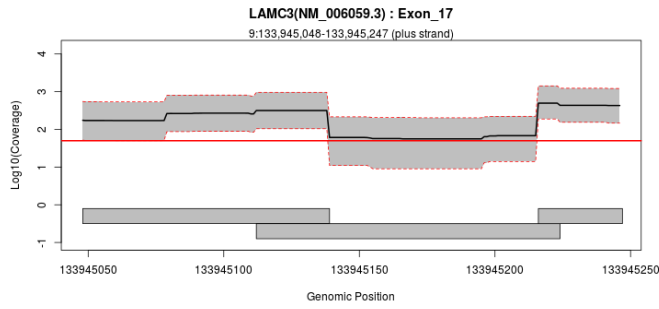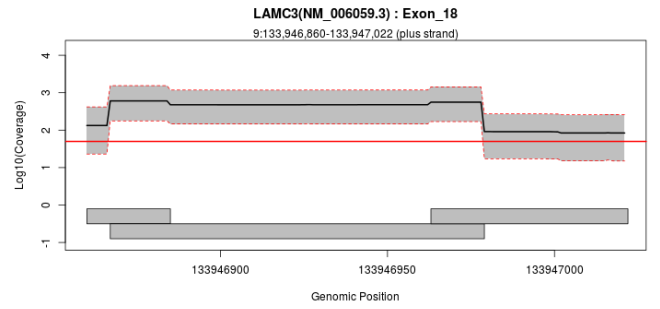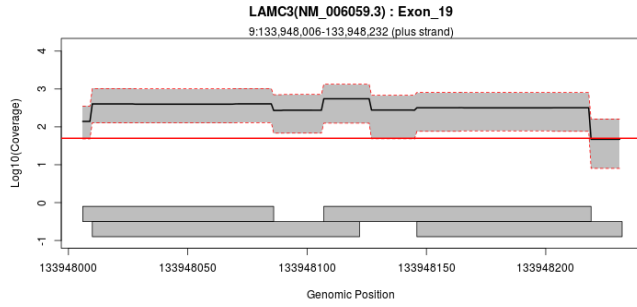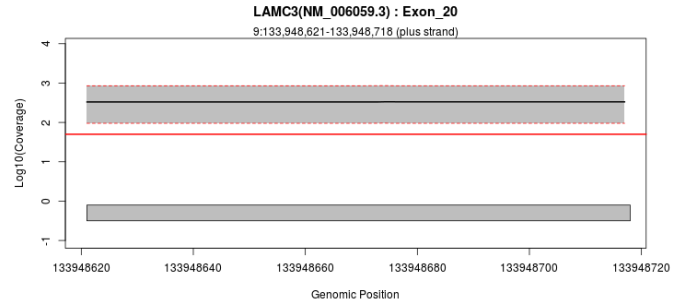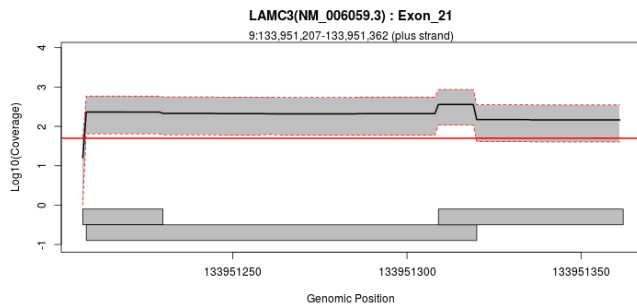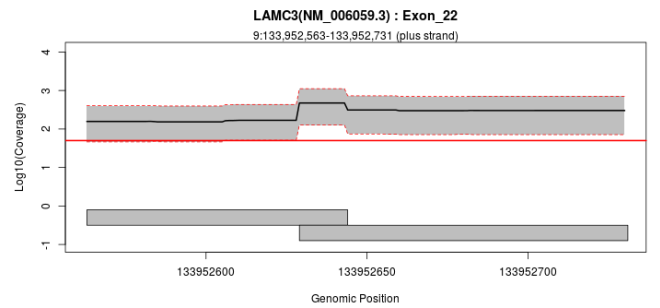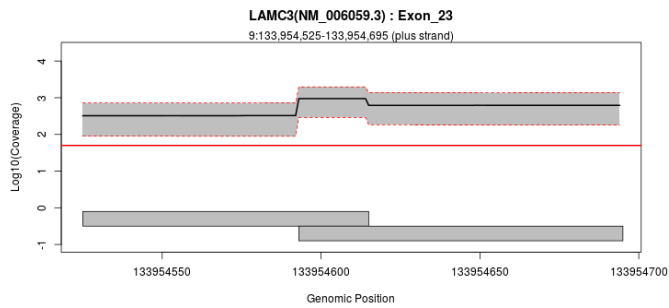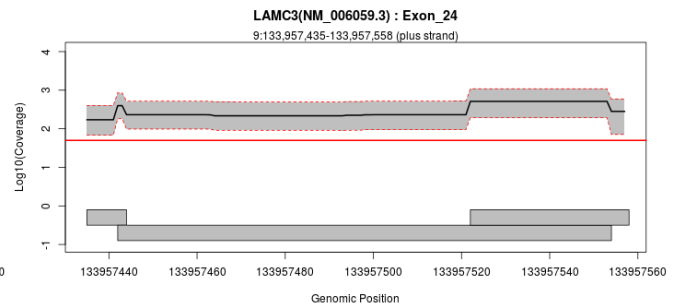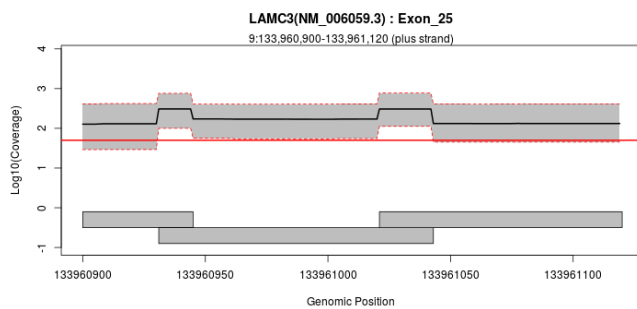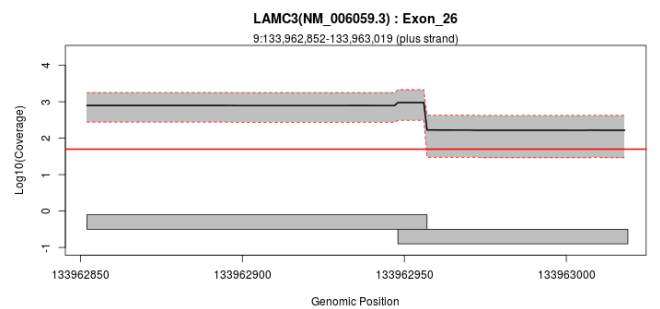

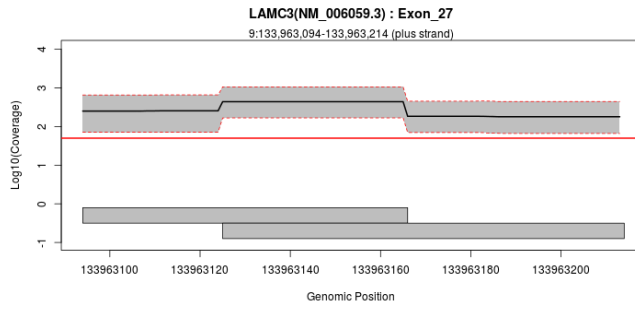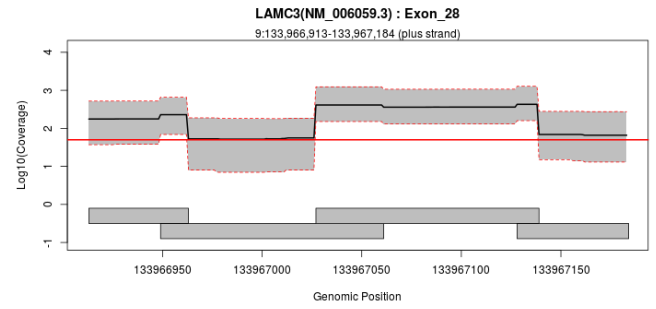

## Exon Overview: LCA5 : NM\_001122769.2

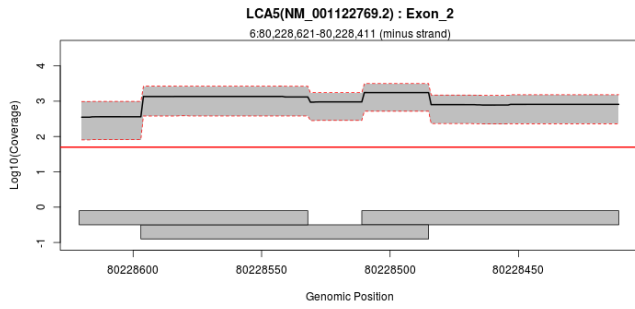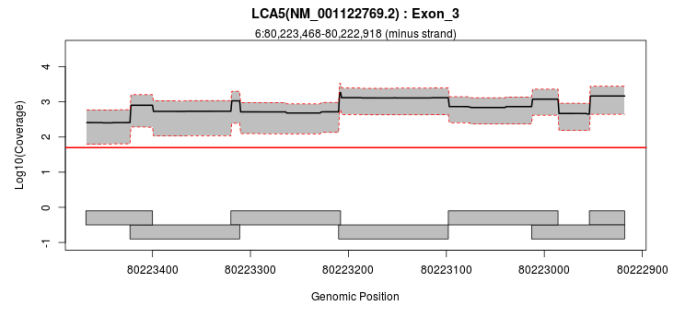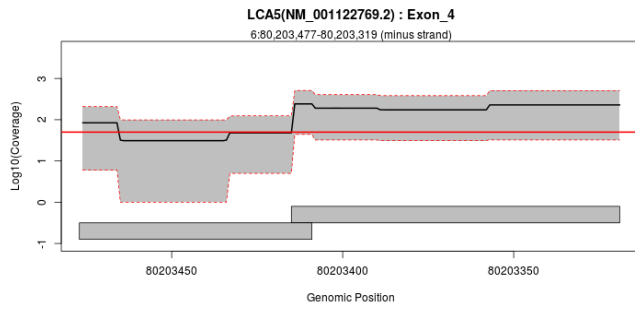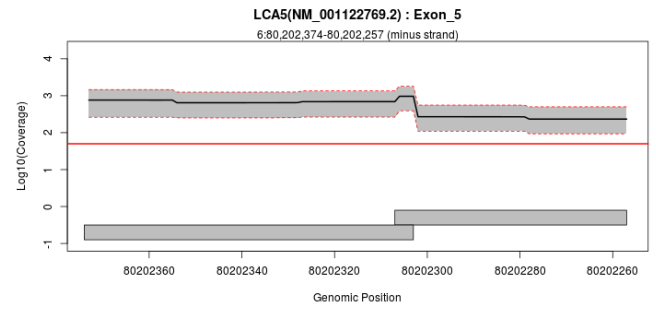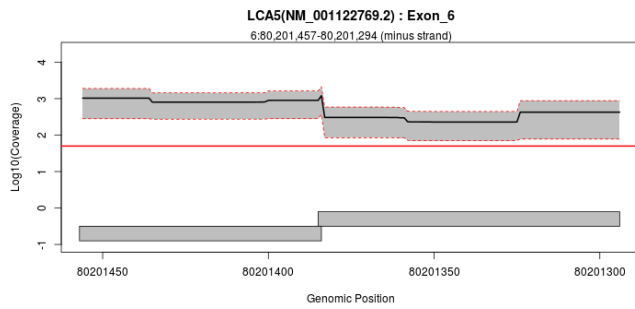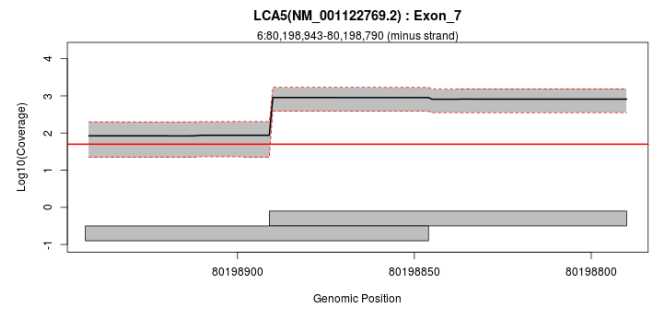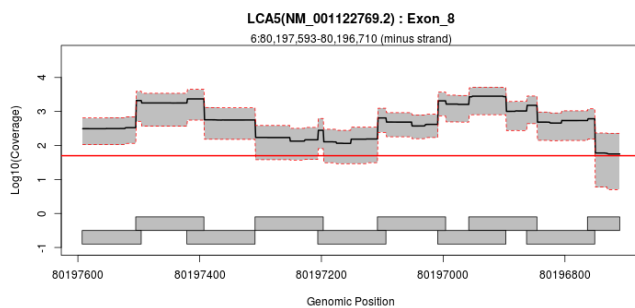

## Exon Overview: LCA5 : NM\_181714.3

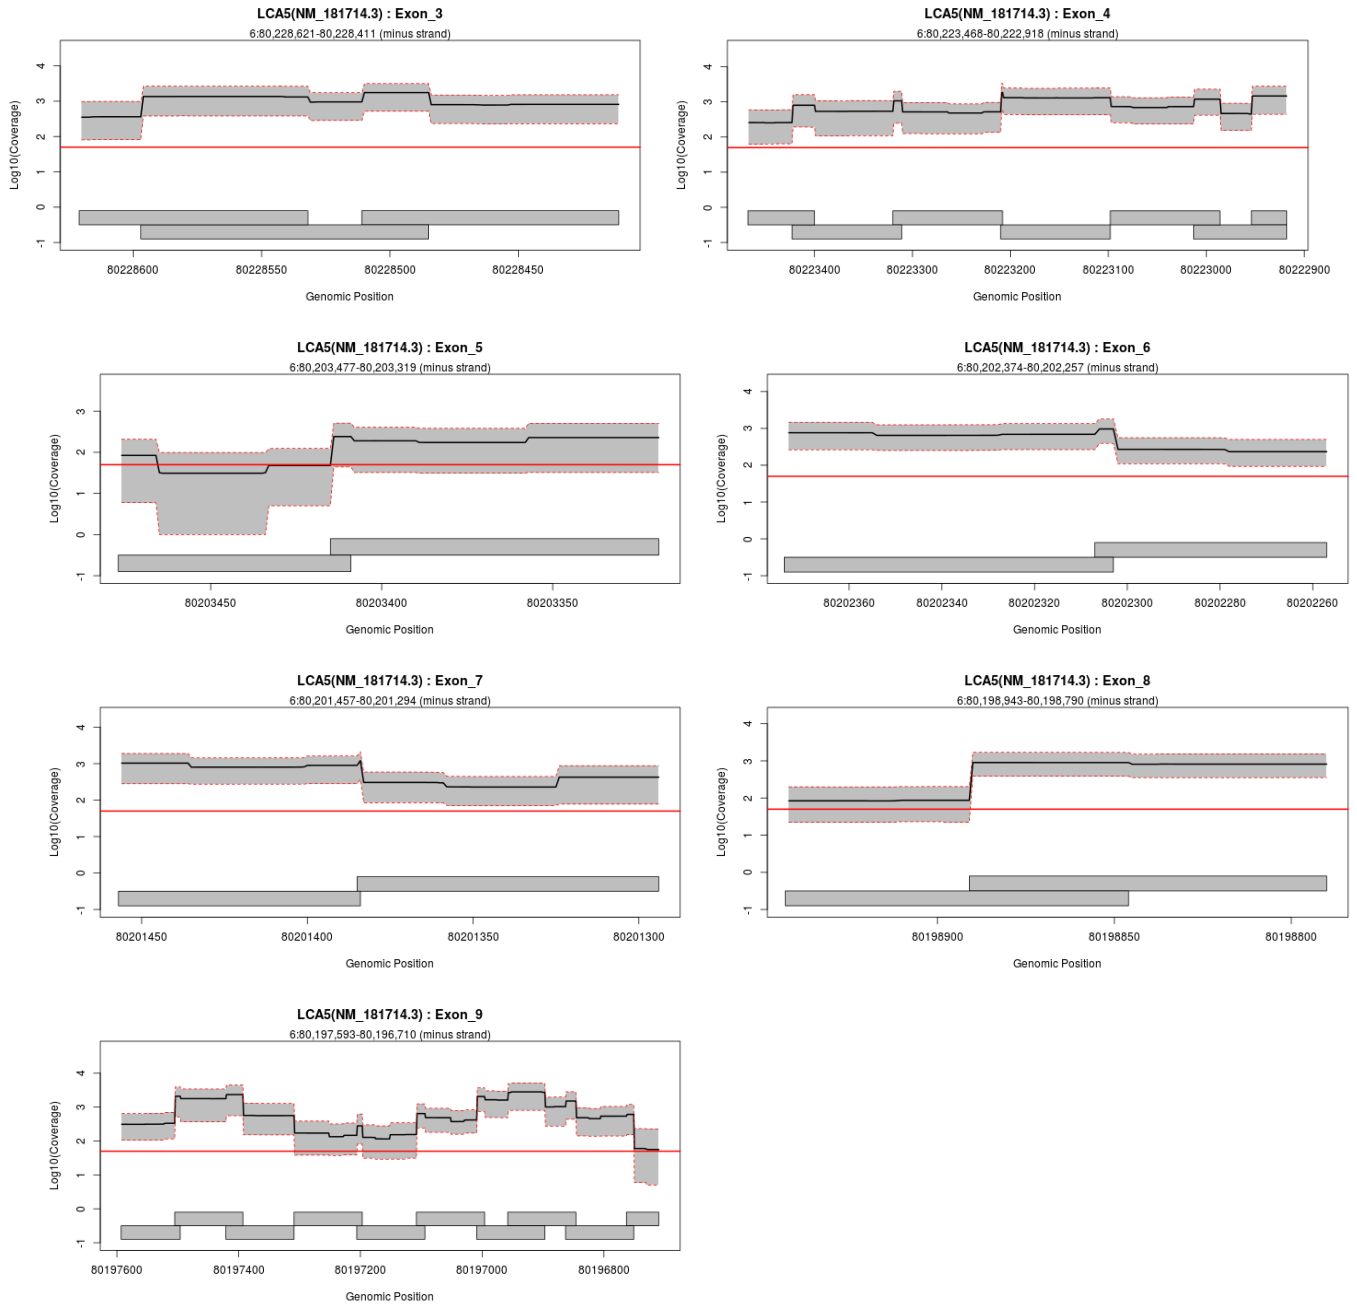

## Exon Overview: LOX : NM\_001178102.2

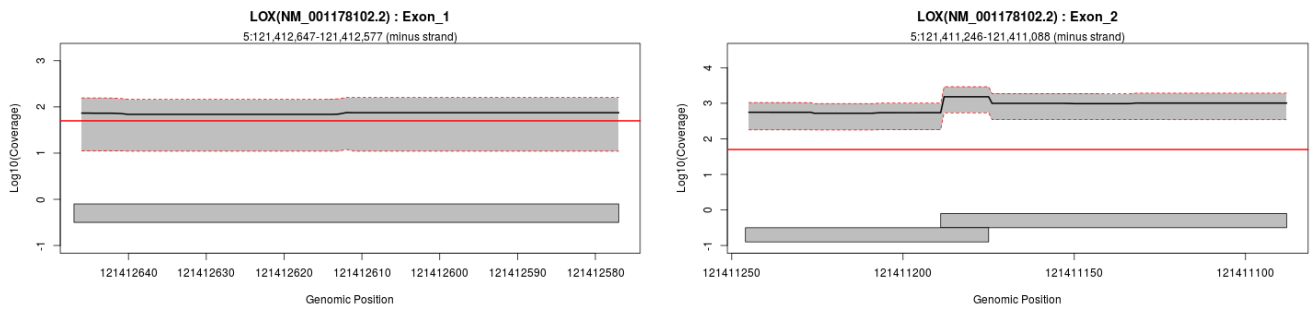

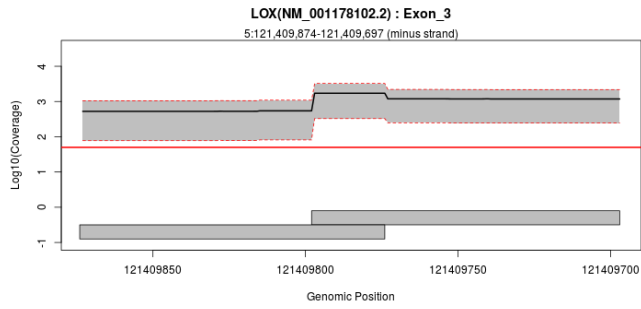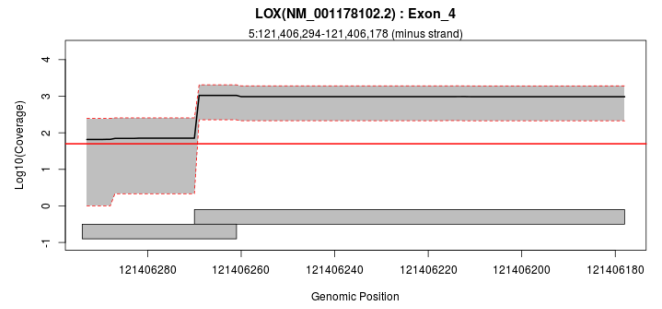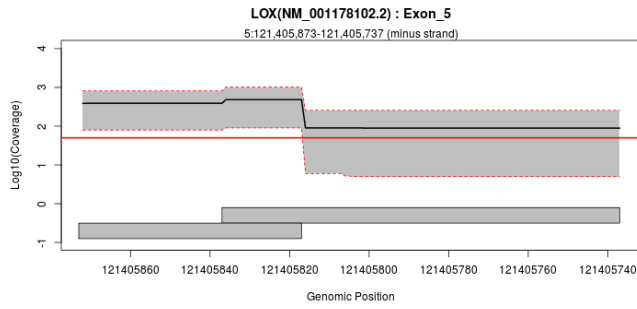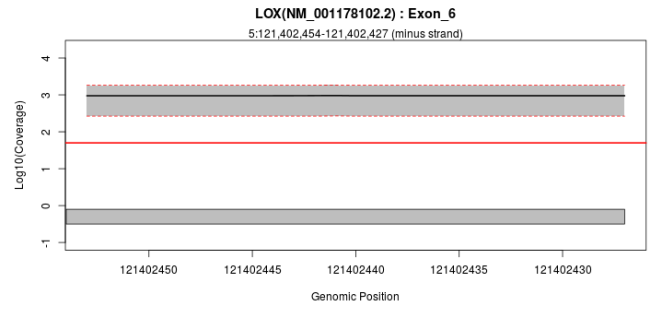

### Exon Overview: LOX : NM\_001317073.1

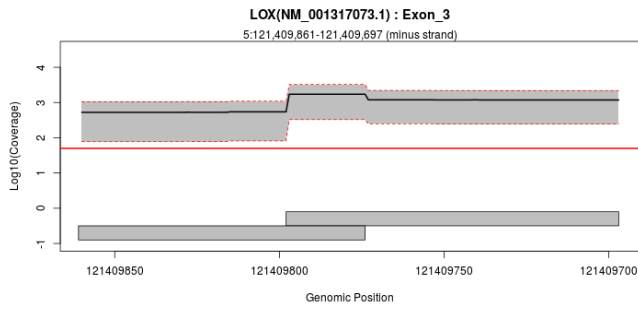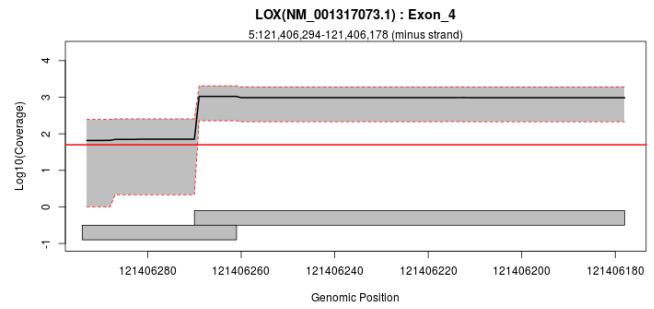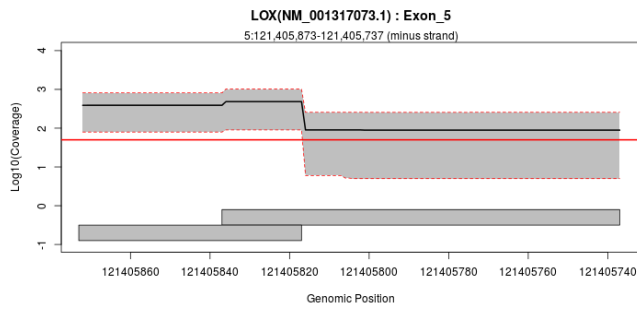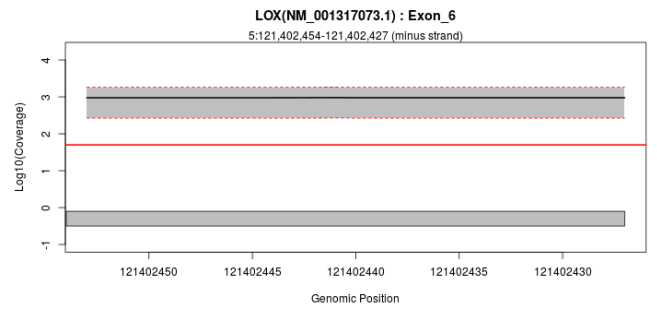

### Exon Overview: LOX : NM\_002317.6

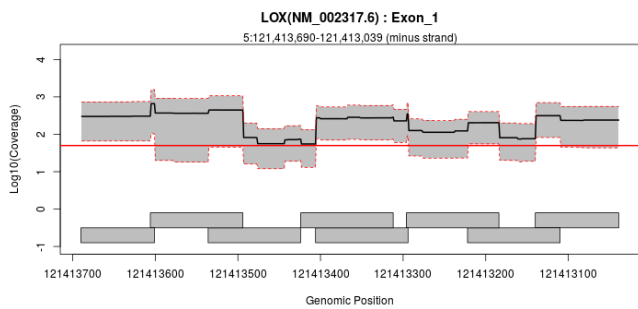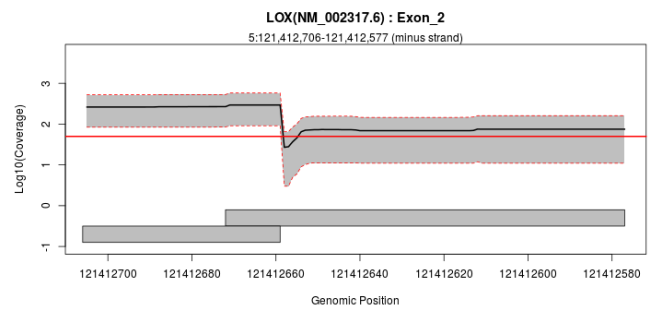



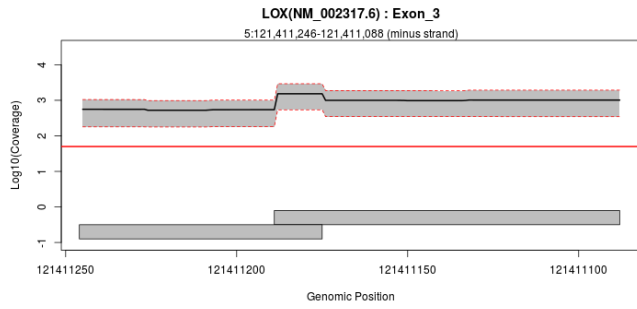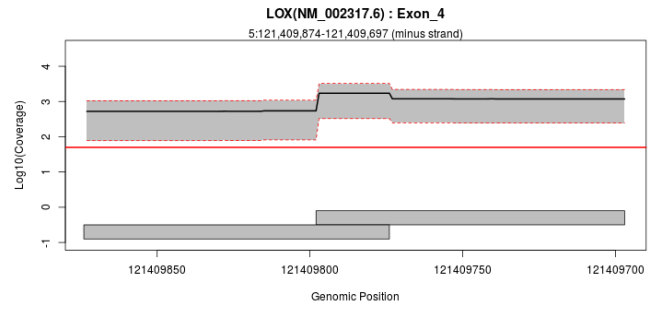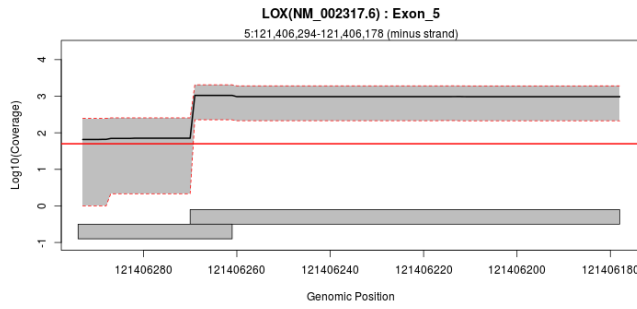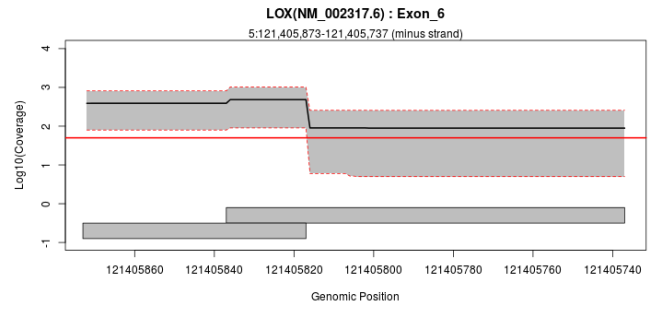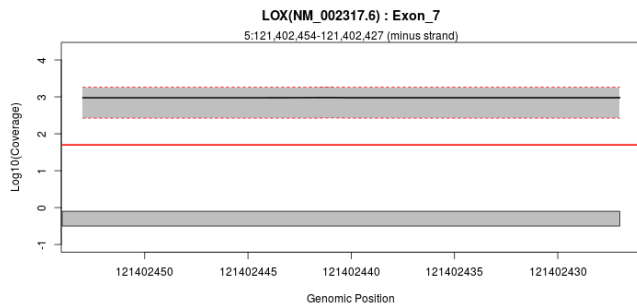

## Exon Overview: LOXHD1 : NM\_001145472.2

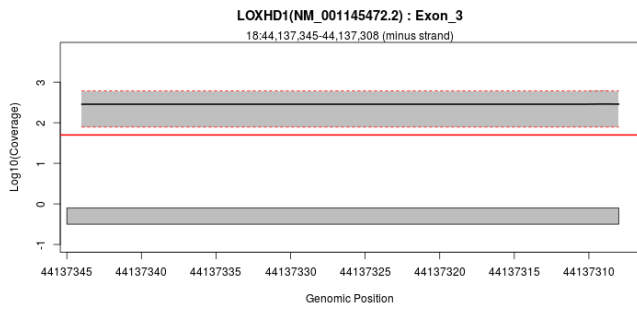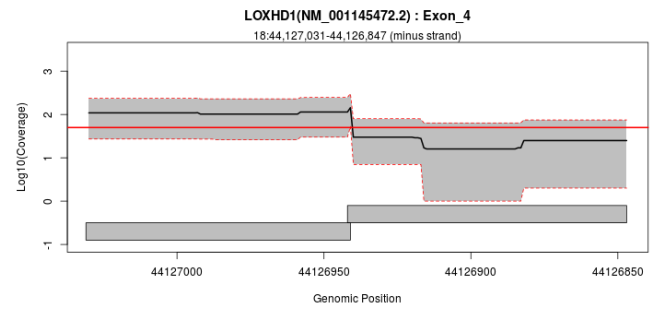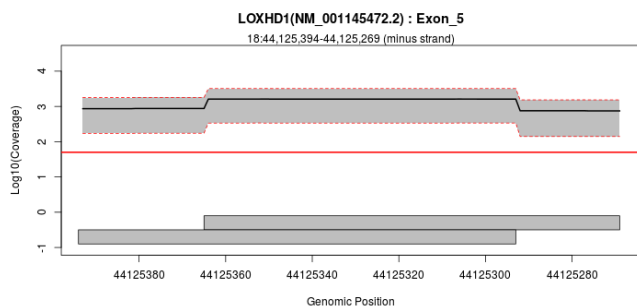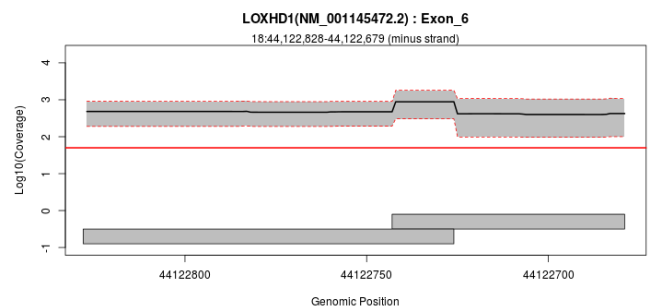

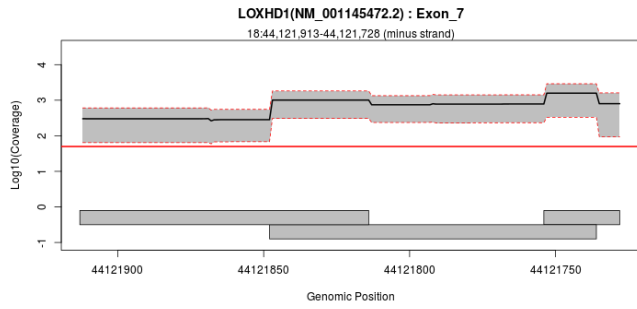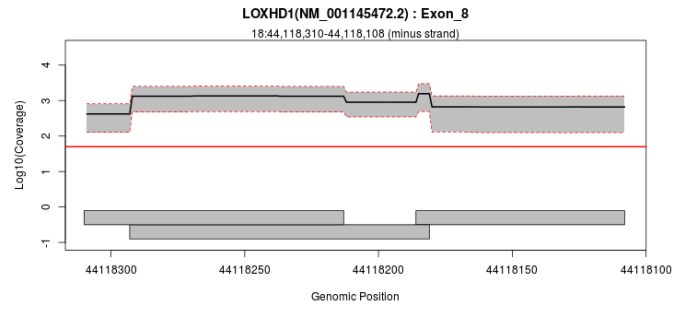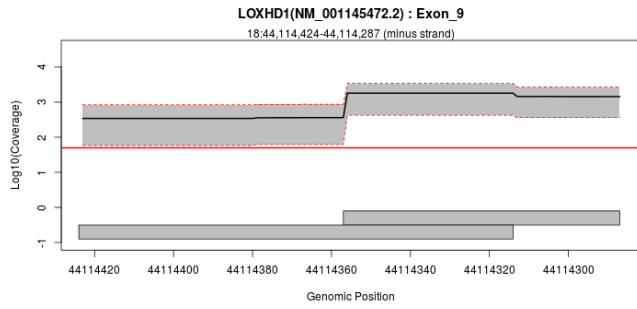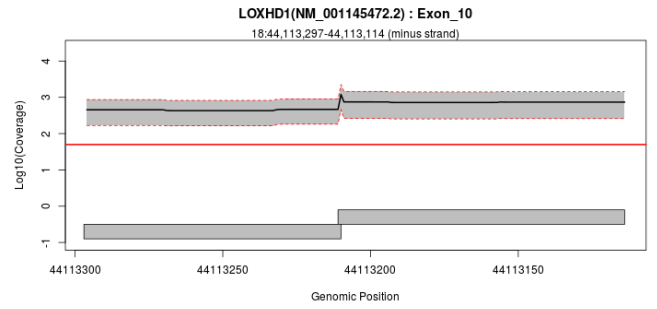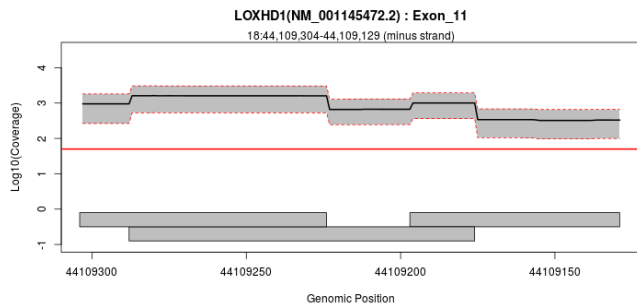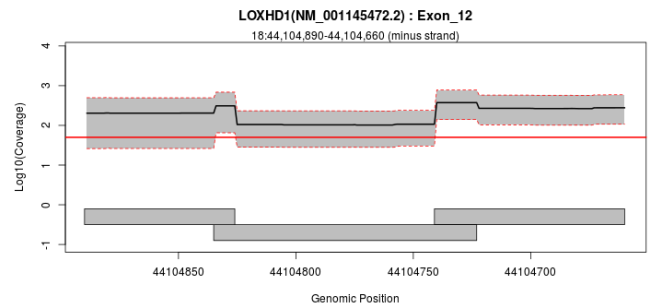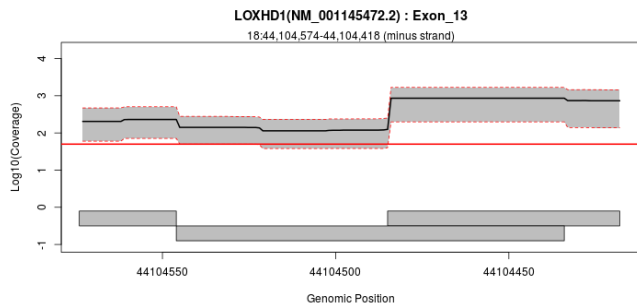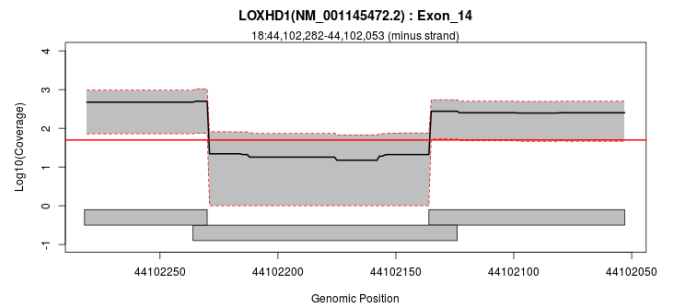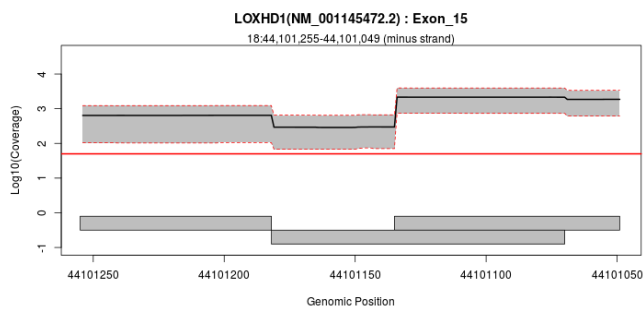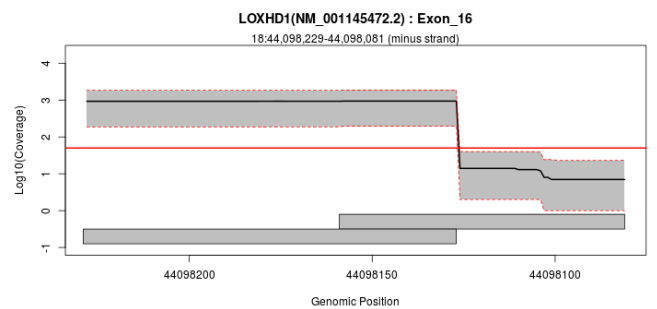

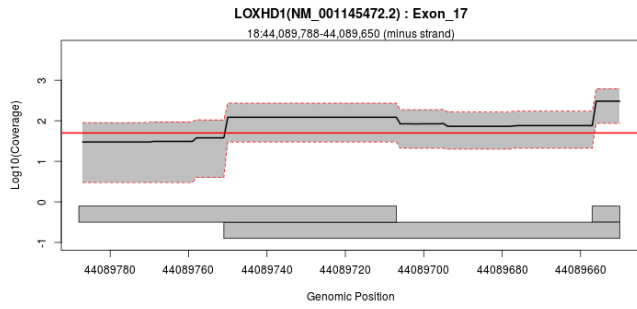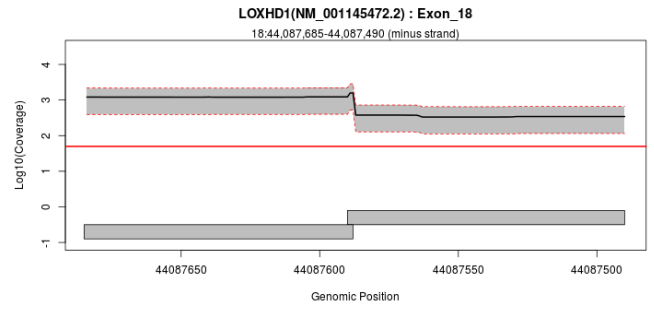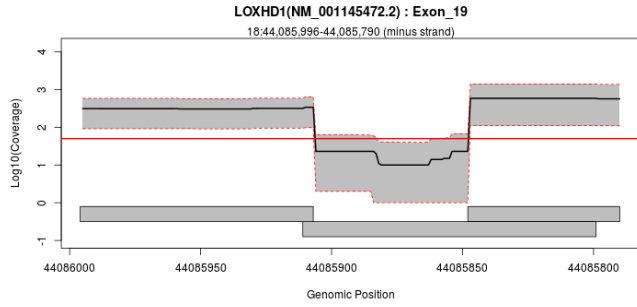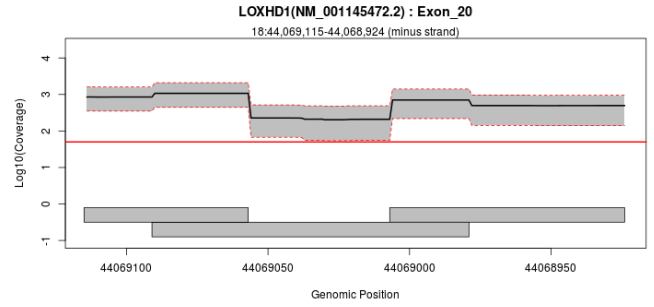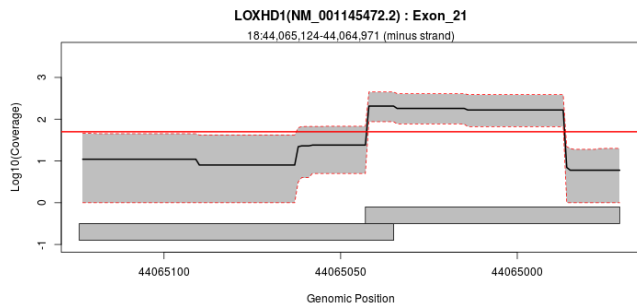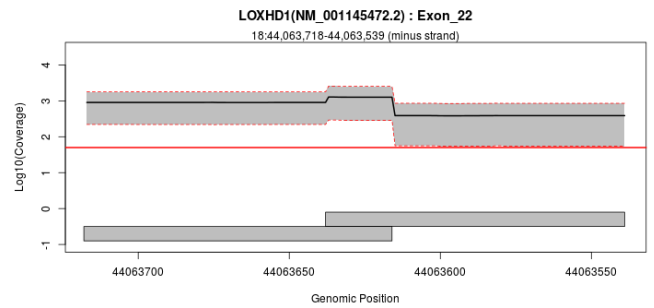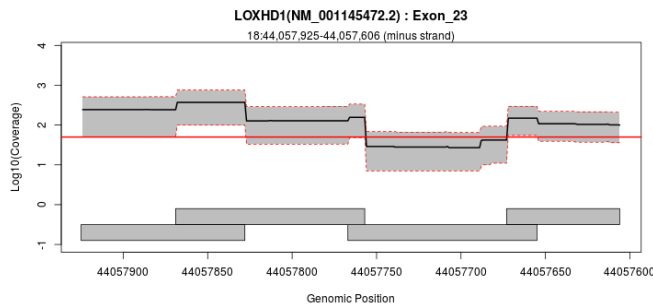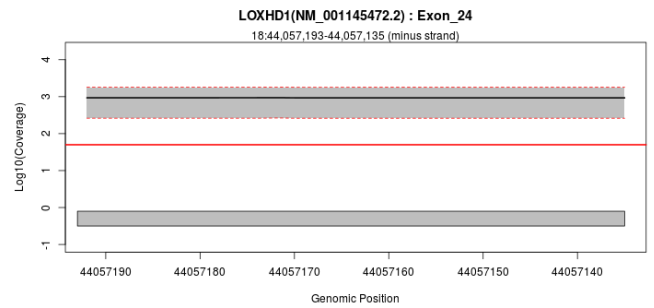

## Exon Overview: LOXHD1 : NM\_001145473.2

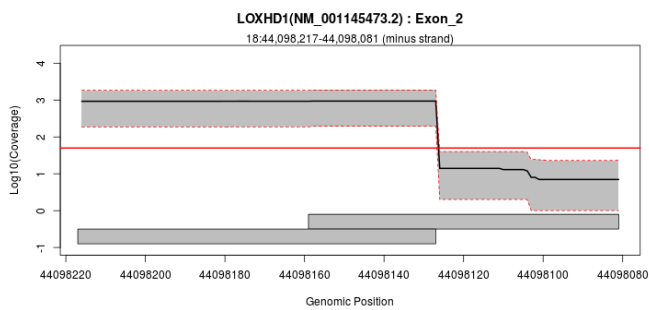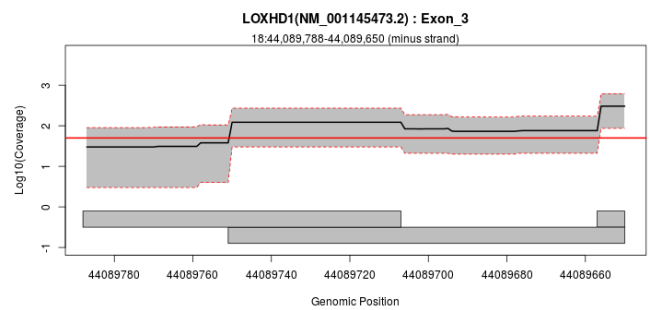

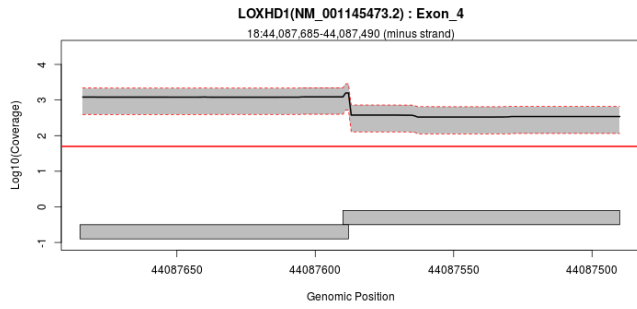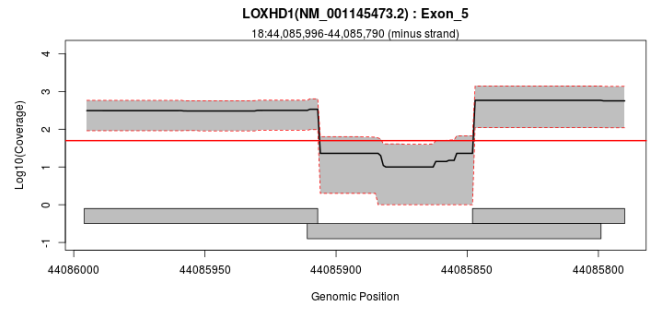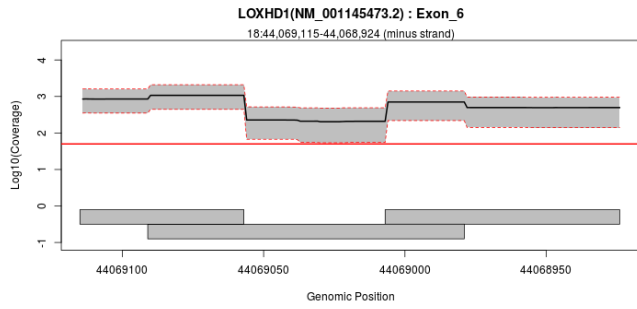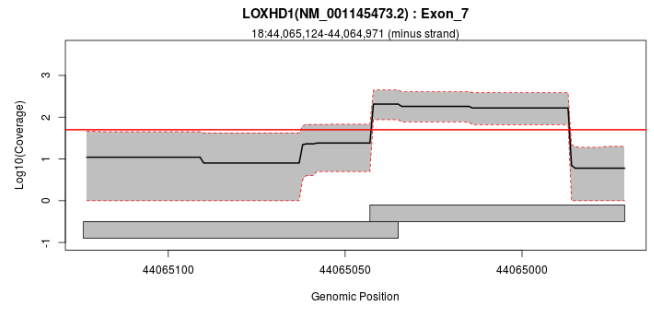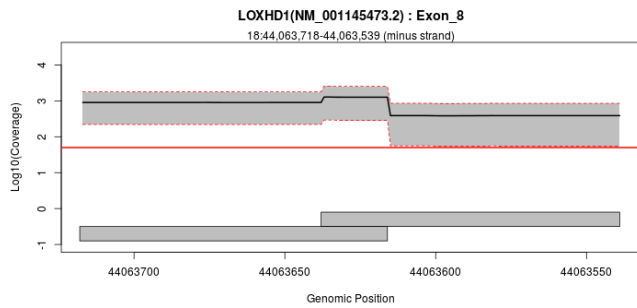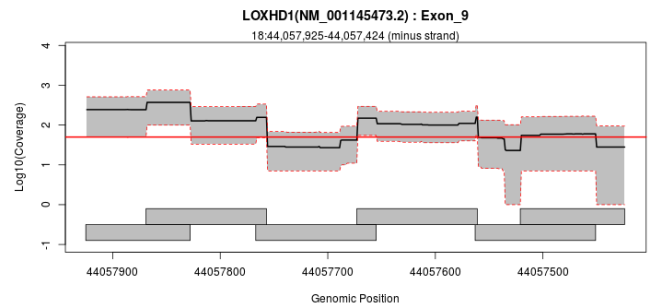

## Exon Overview: LOXHD1 : NM\_001173129.1

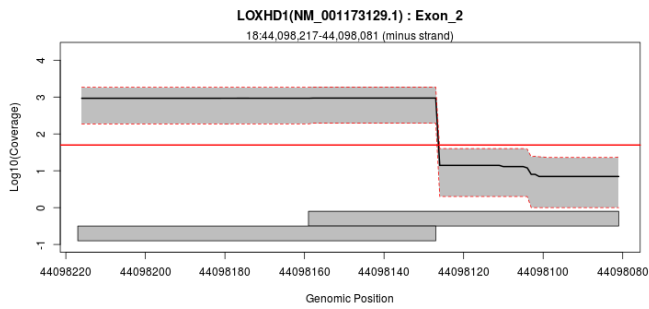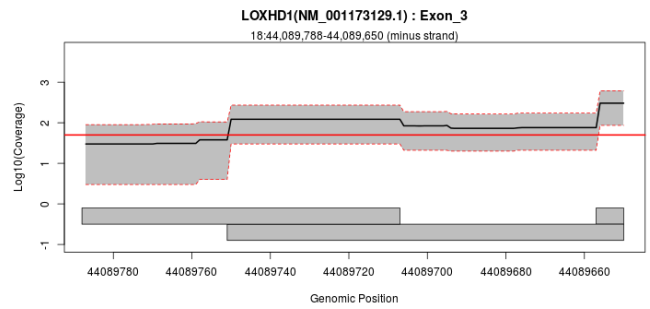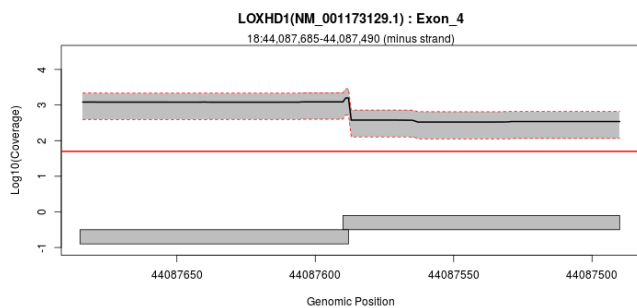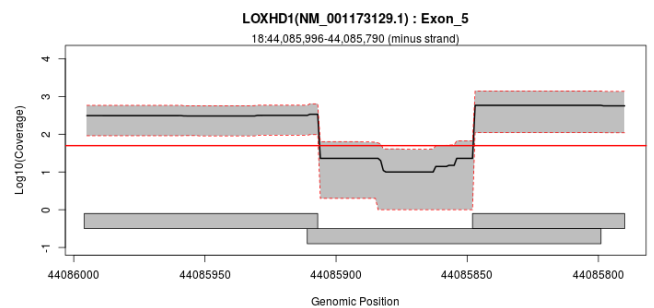

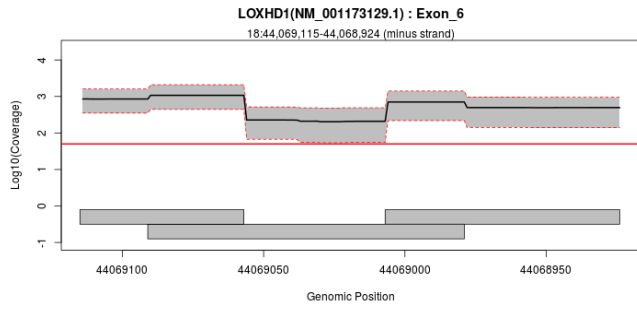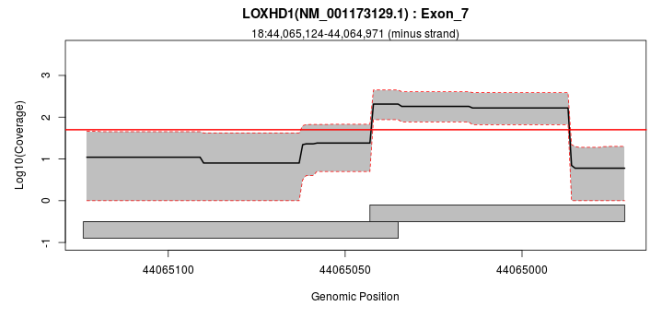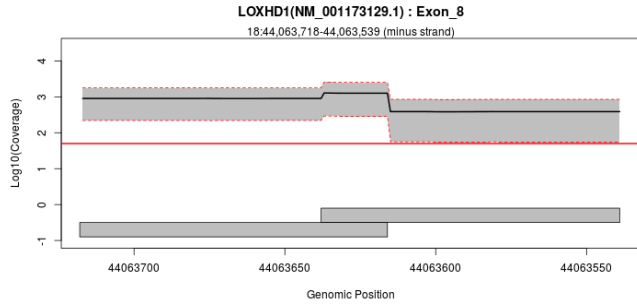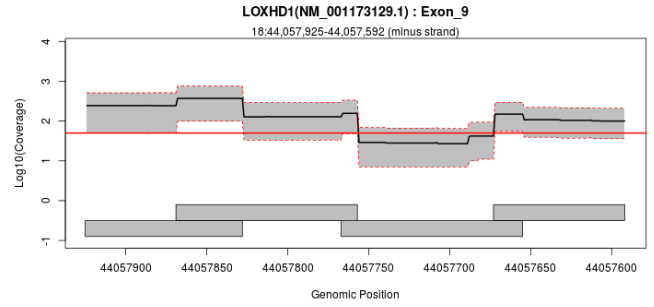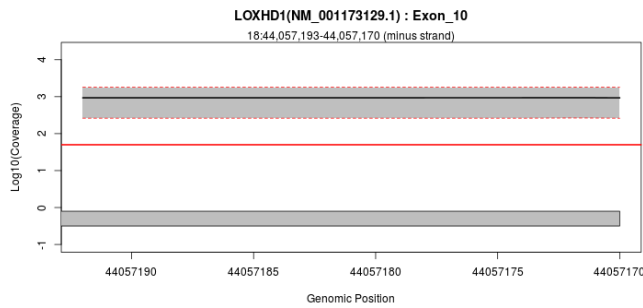

## Exon Overview: LOXHD1 : NM\_001308013.1

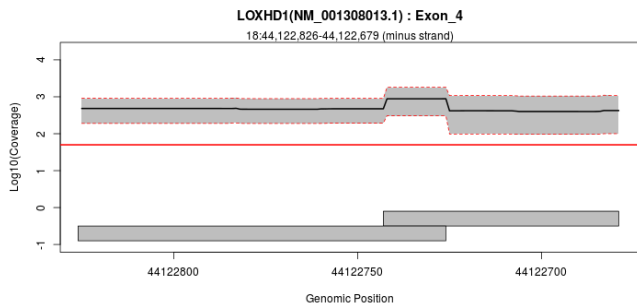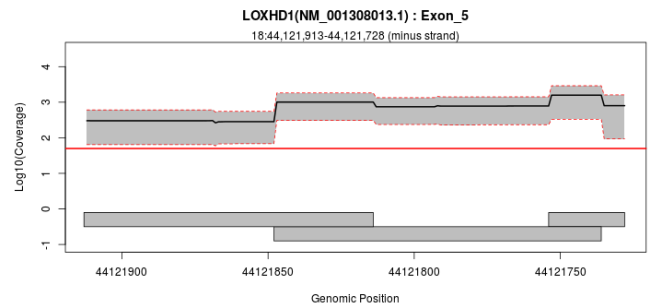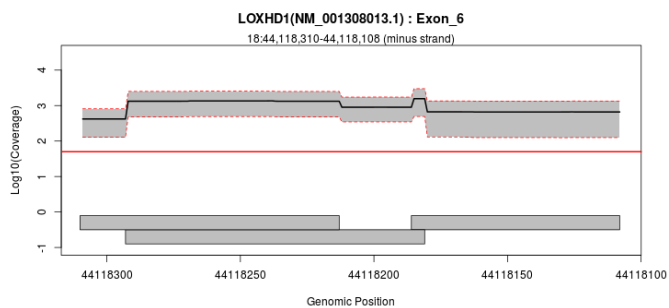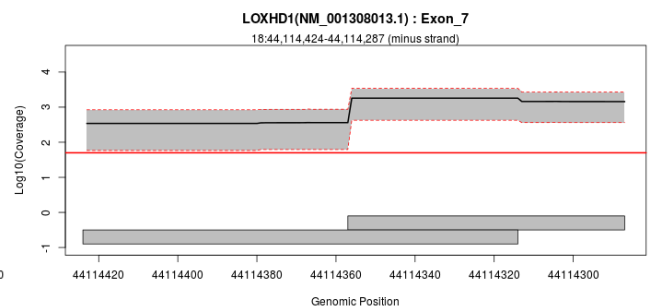

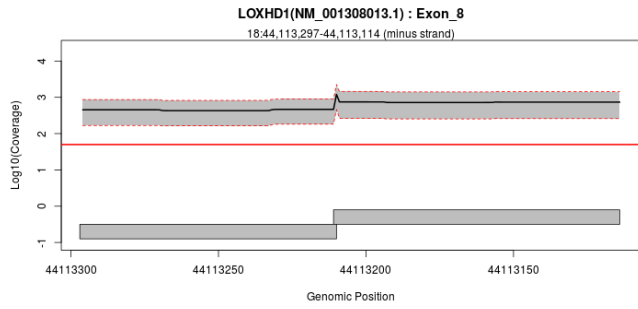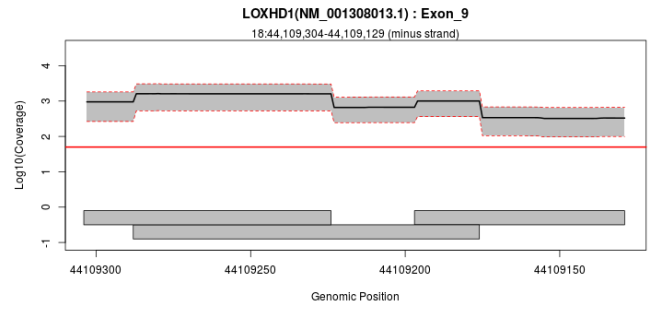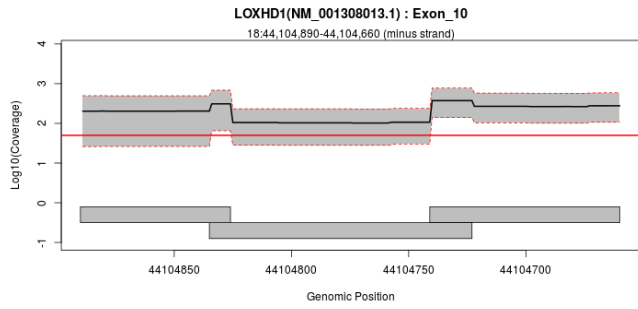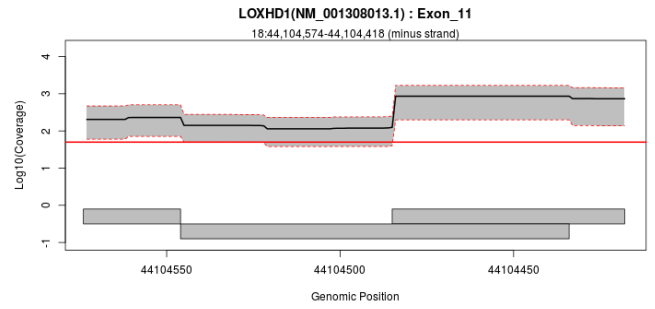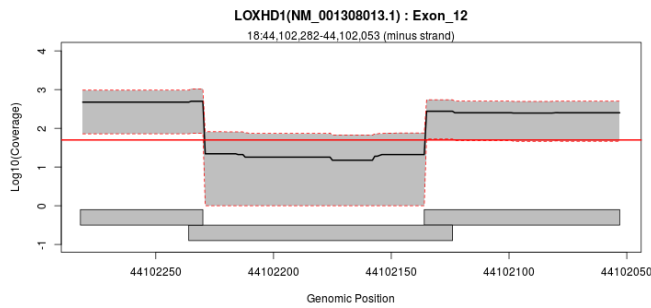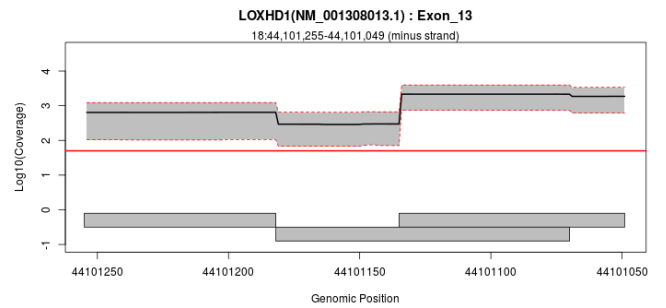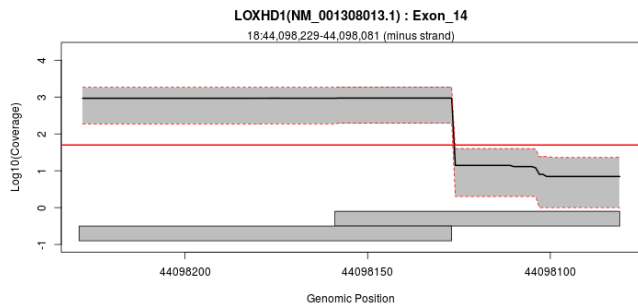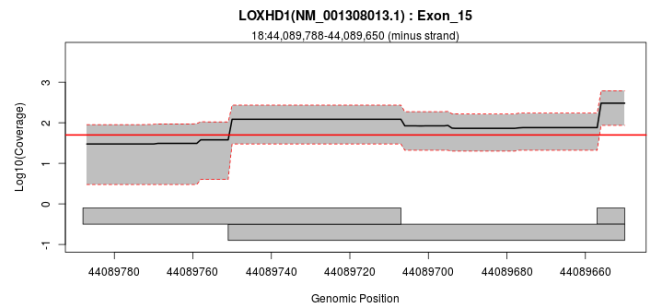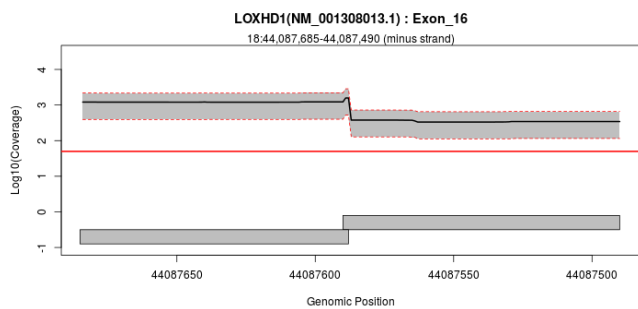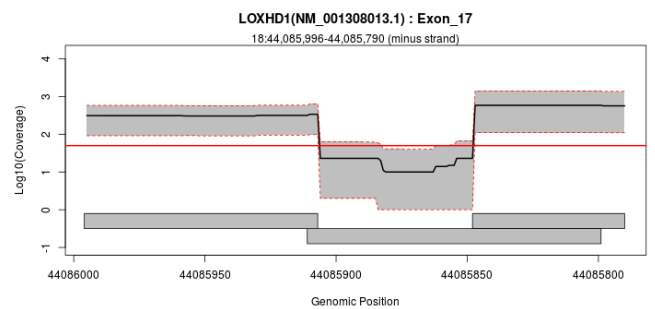

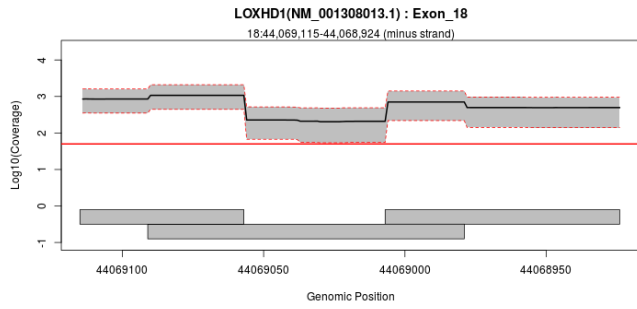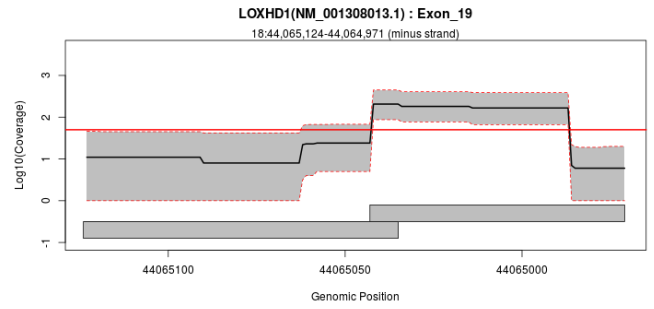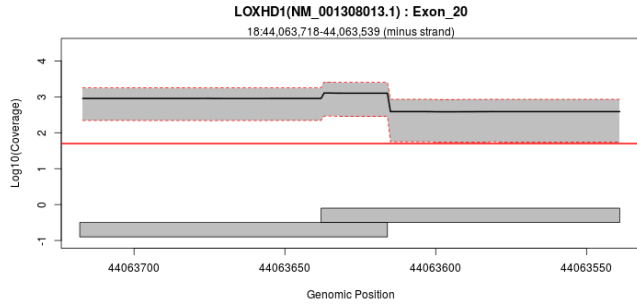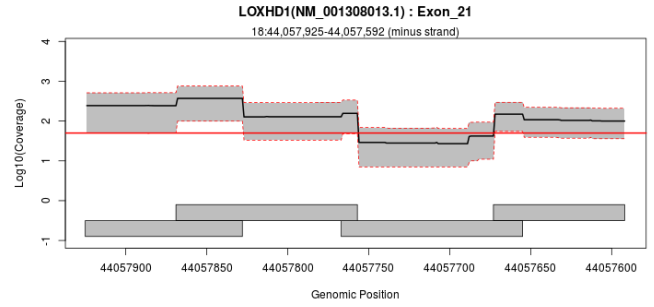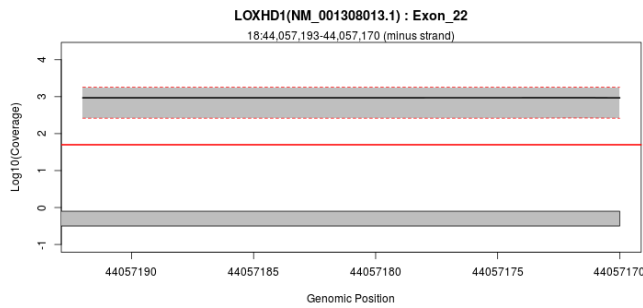

## Exon Overview: LOXHD1 : NM\_144612.6

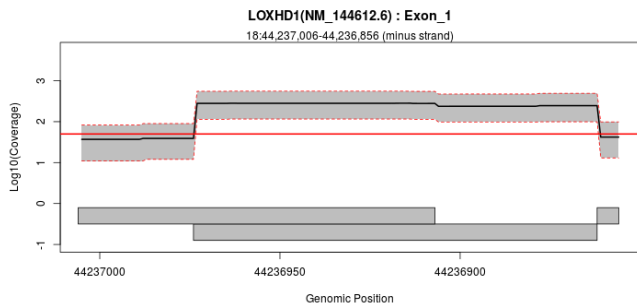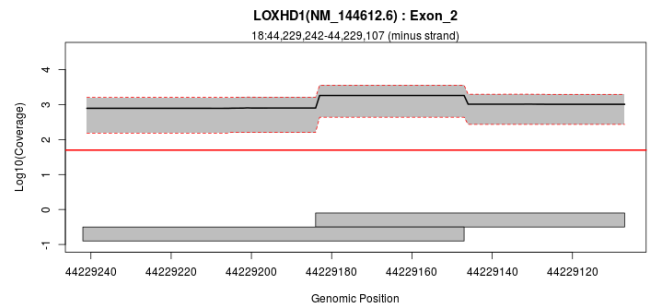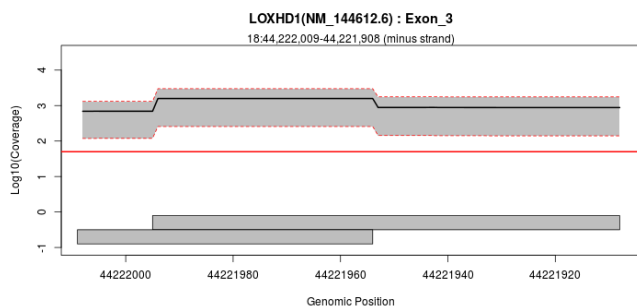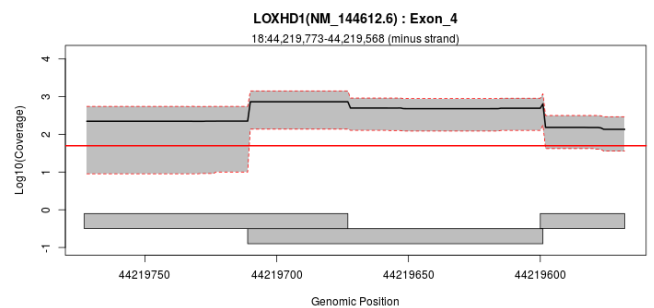

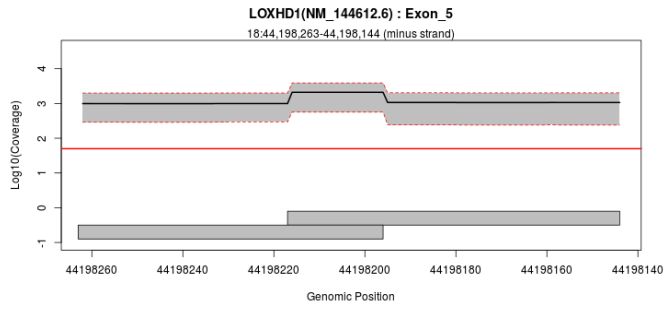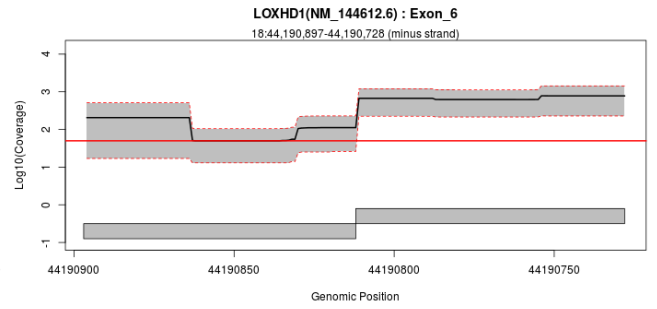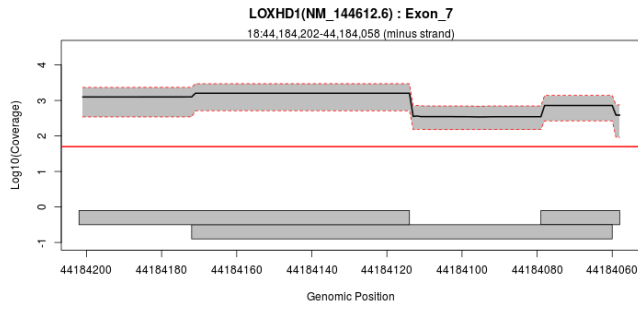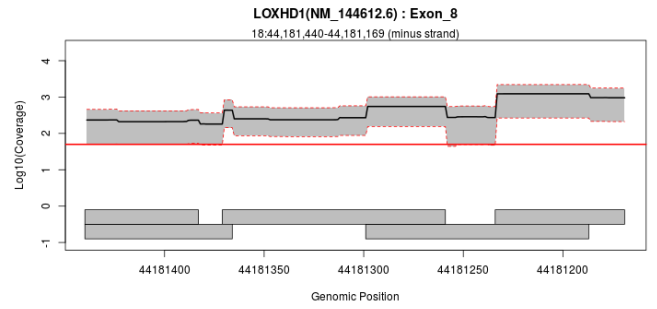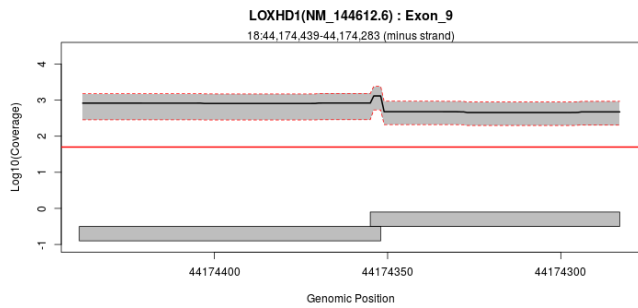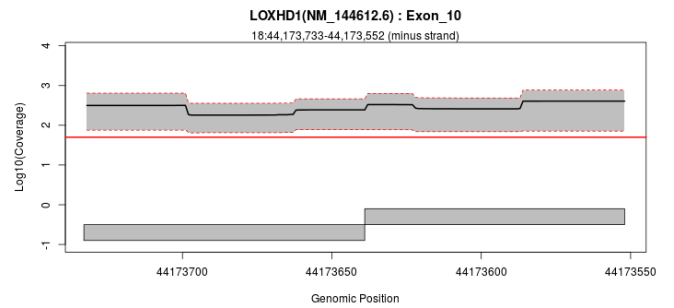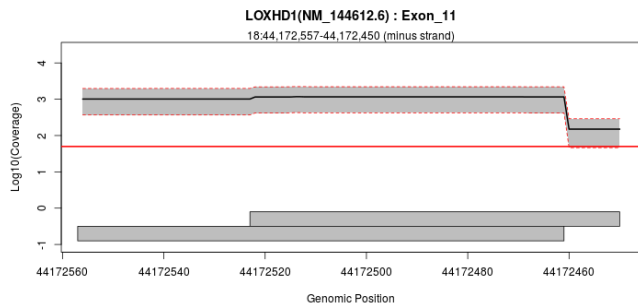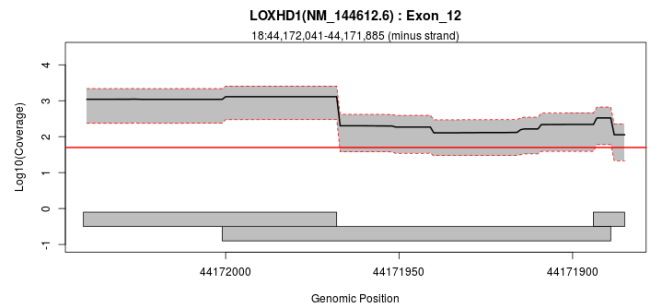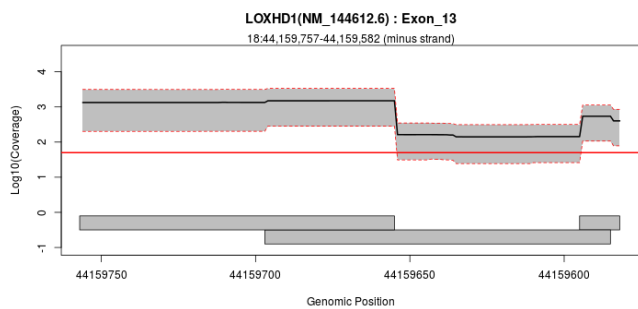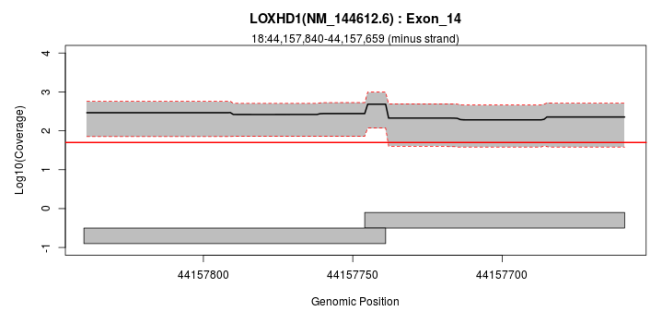



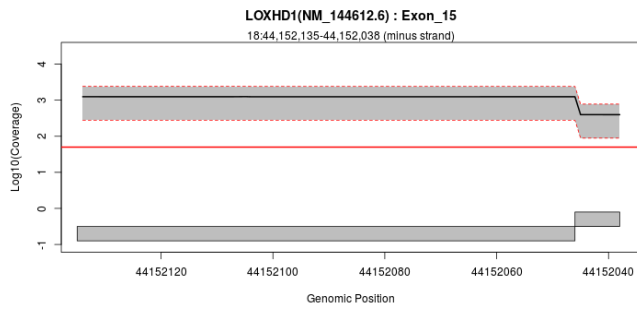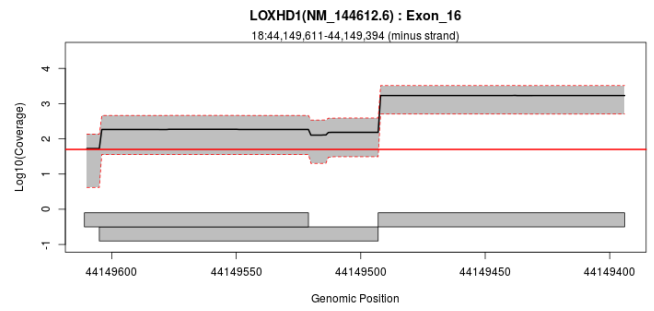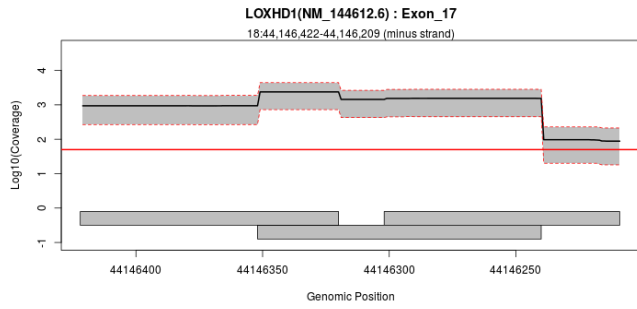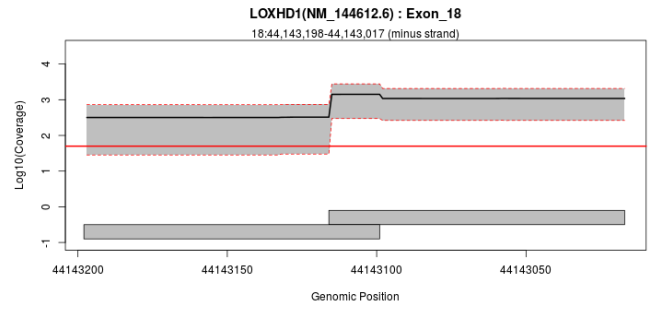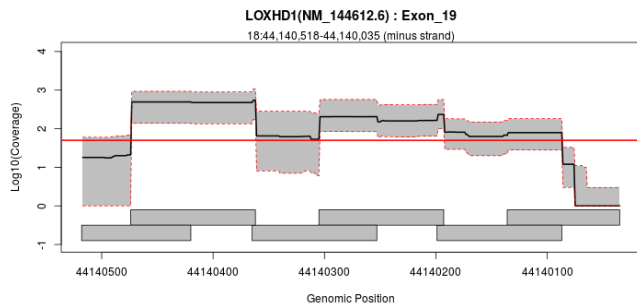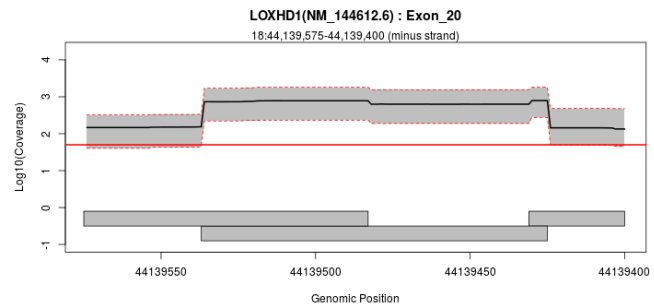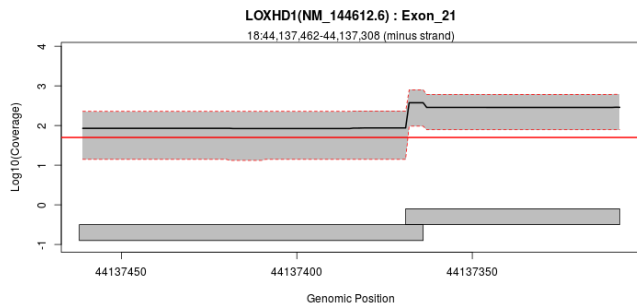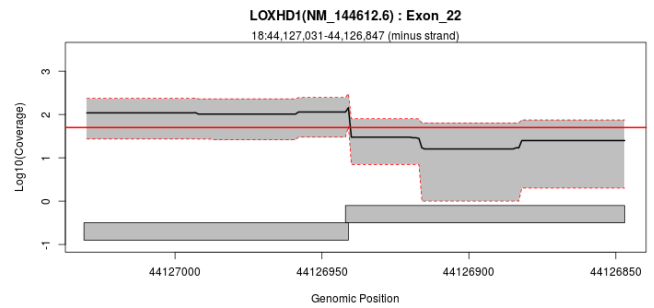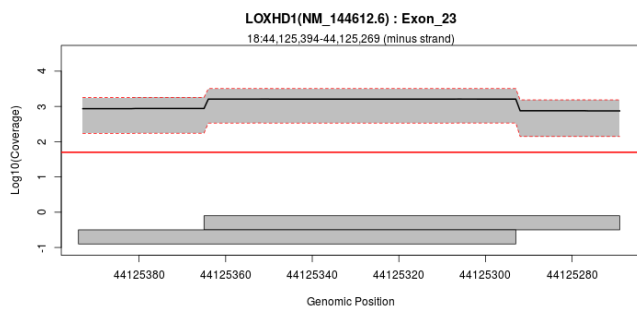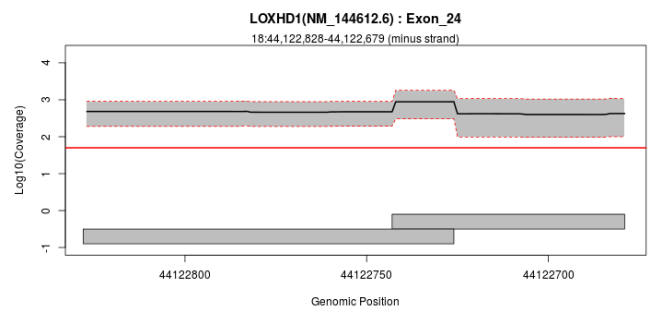

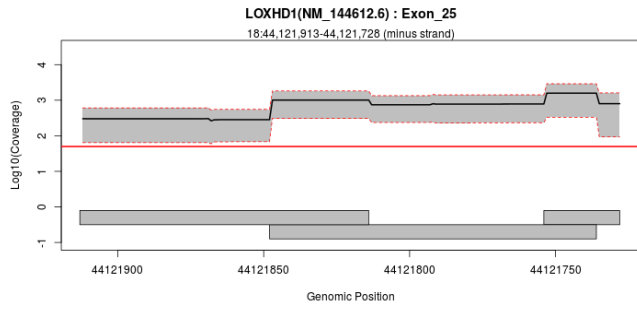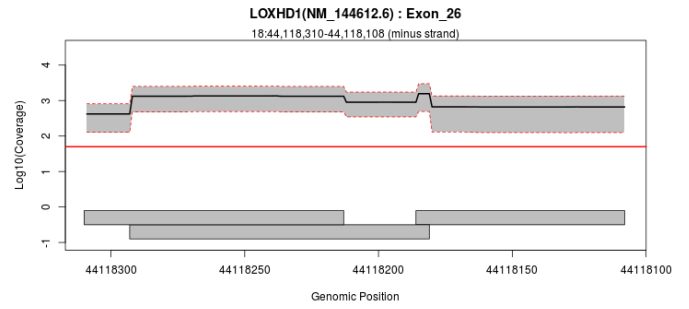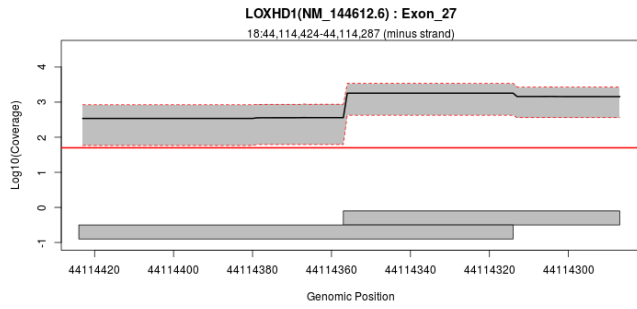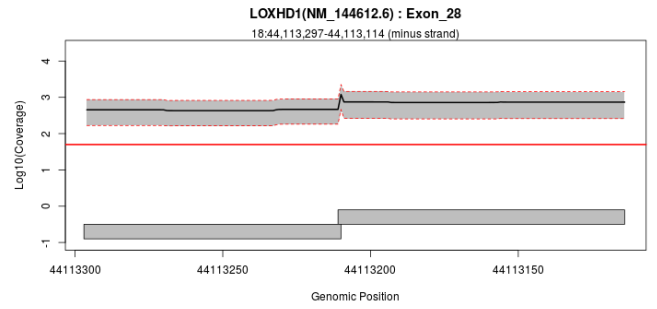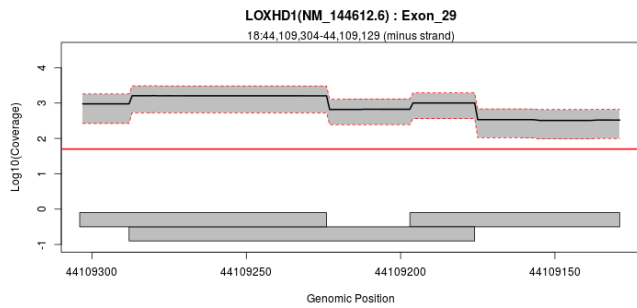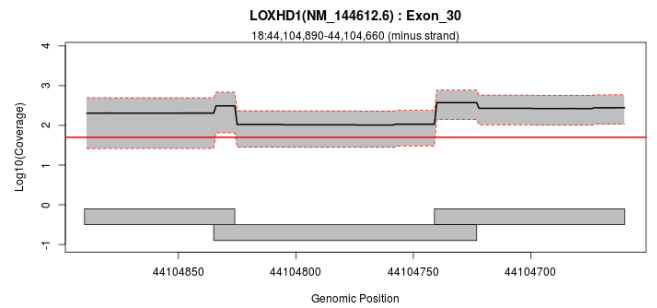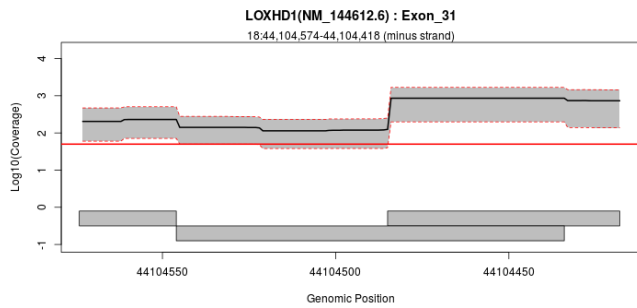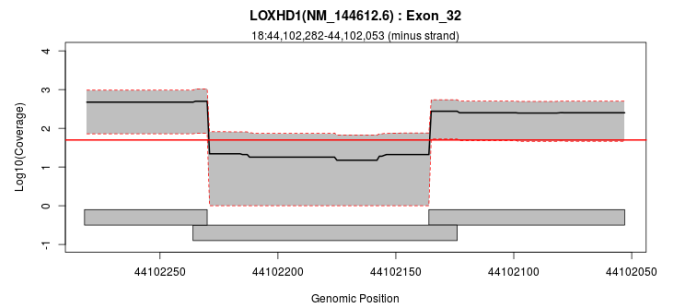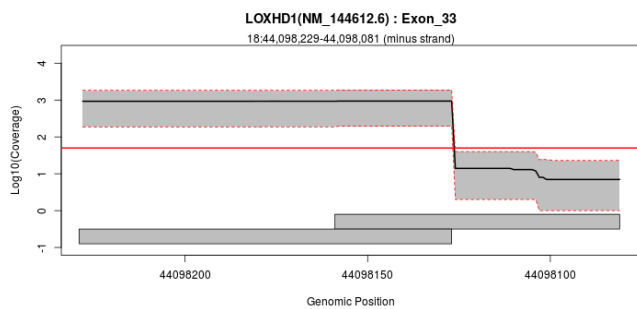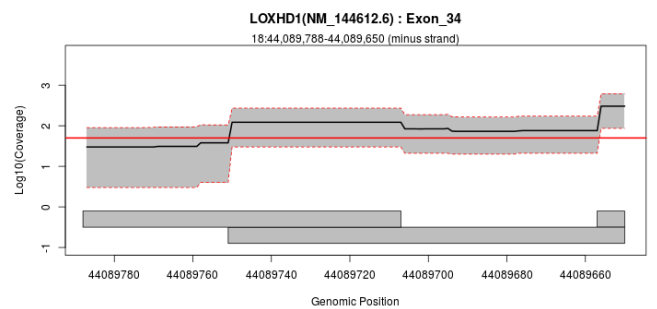

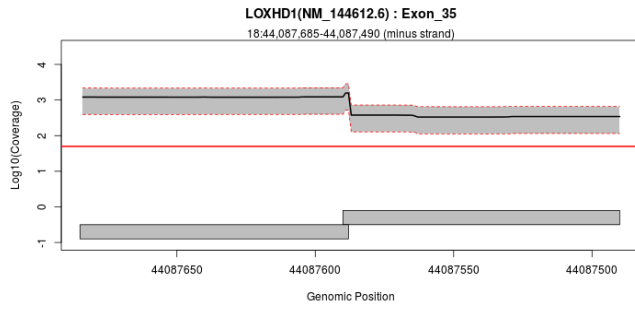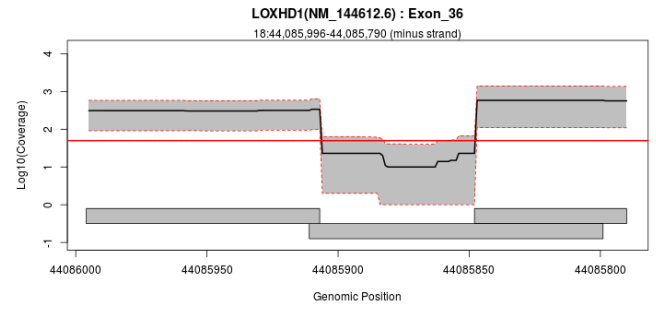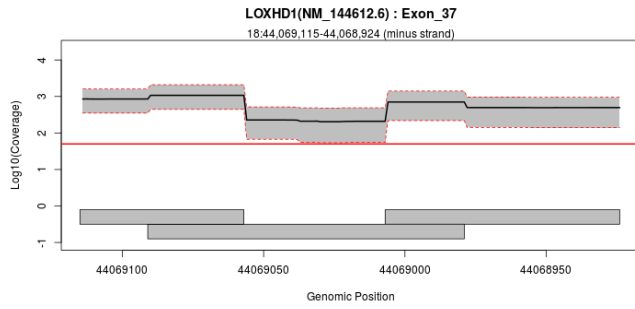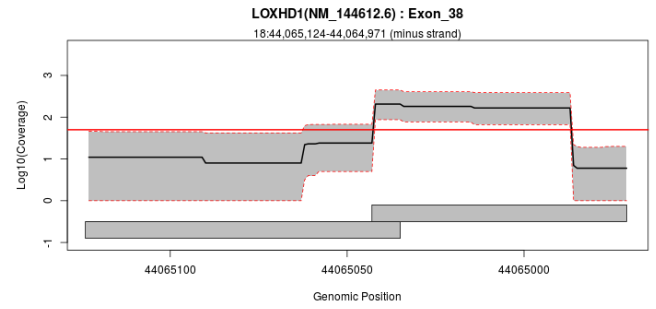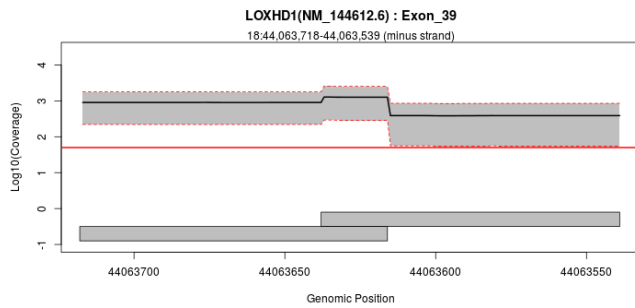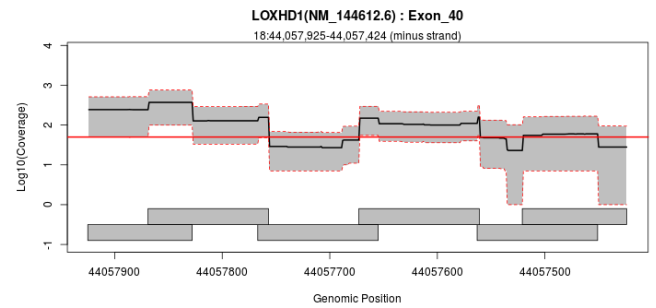

### Exon Overview: MIR184.nc : NR\_029705.1

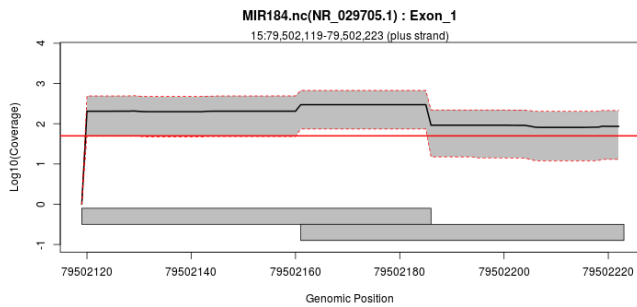

### Exon Overview: MMP9 : NM\_004994.2

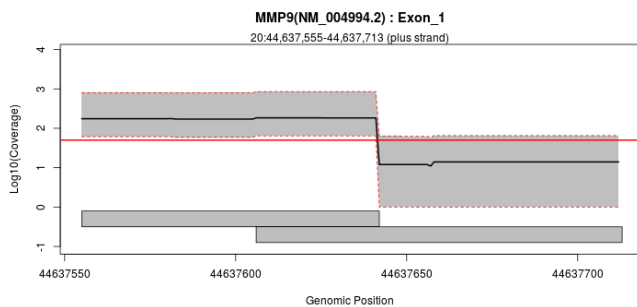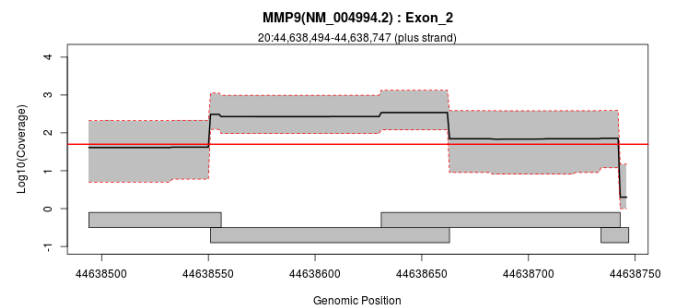

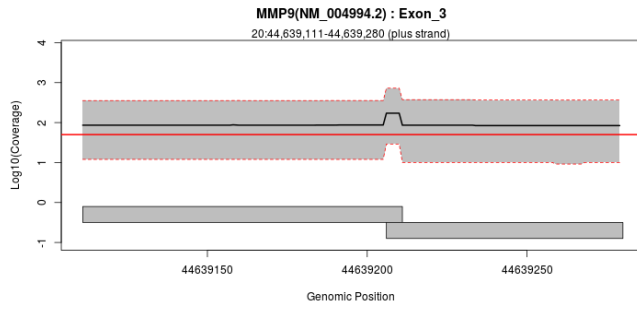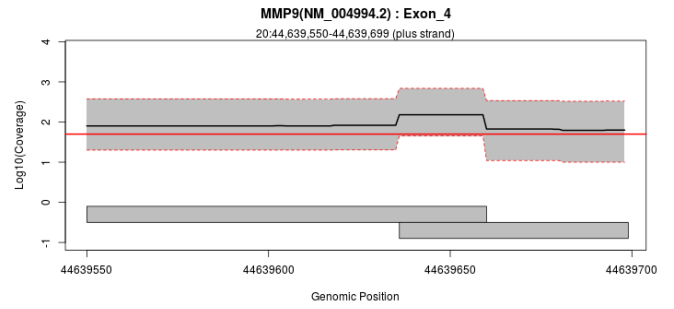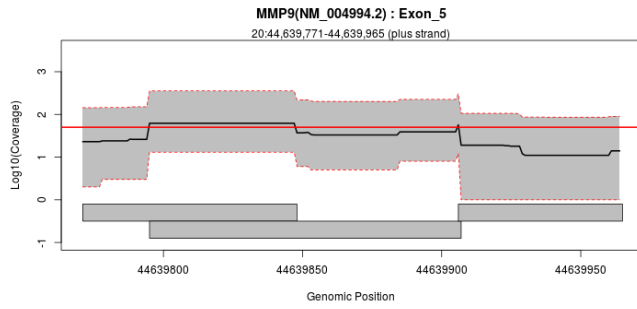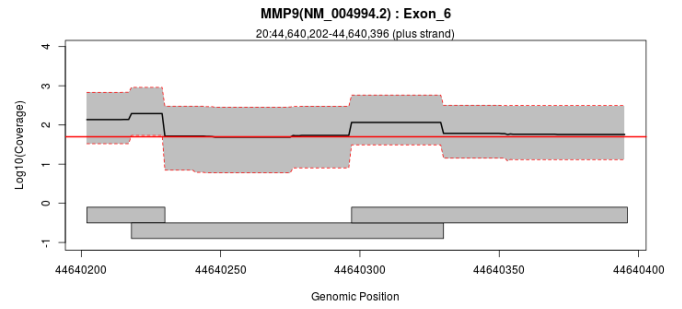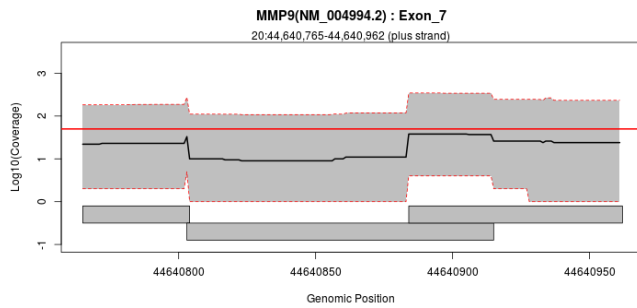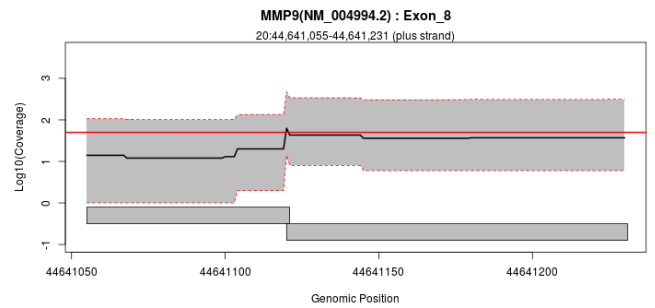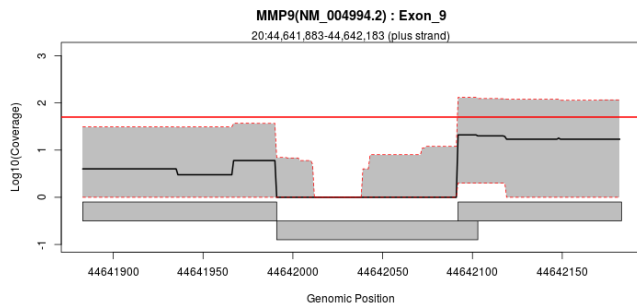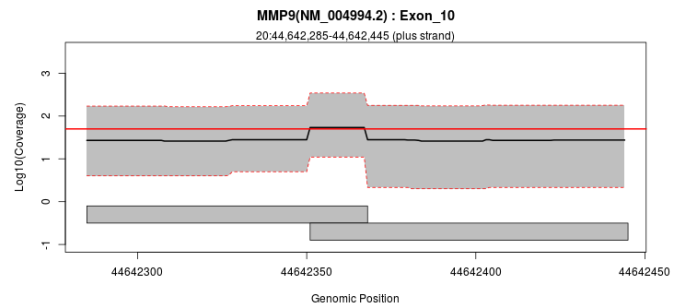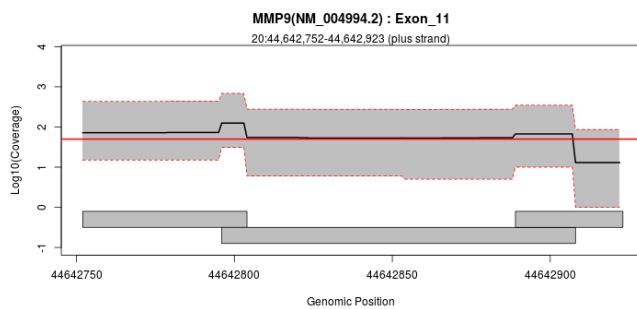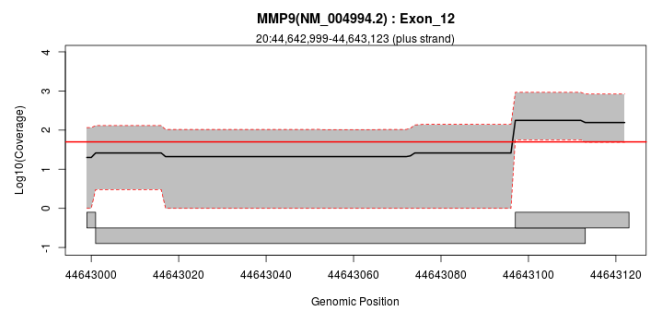

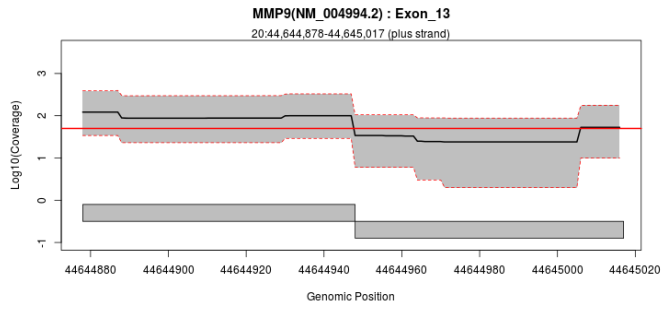

## Exon Overview: NLRP1 : NM\_001033053.2

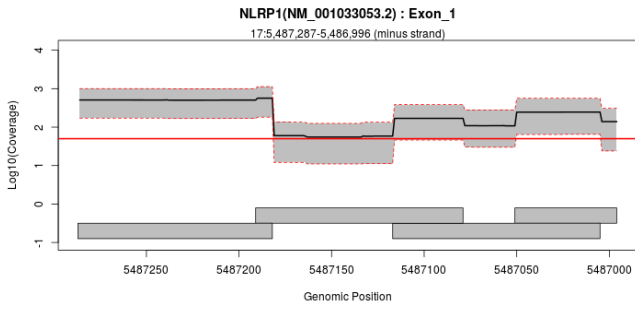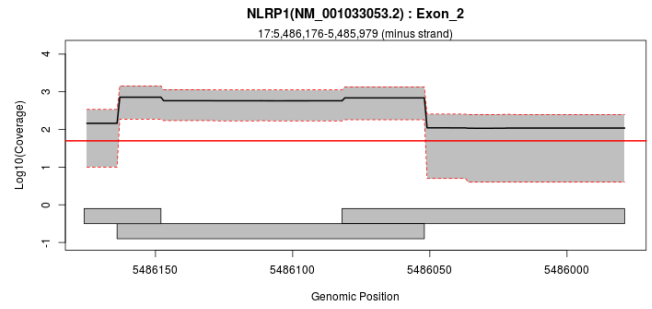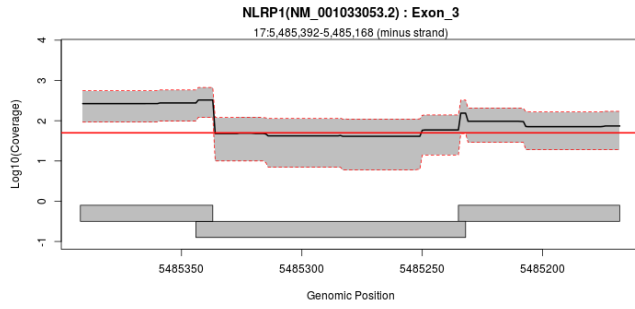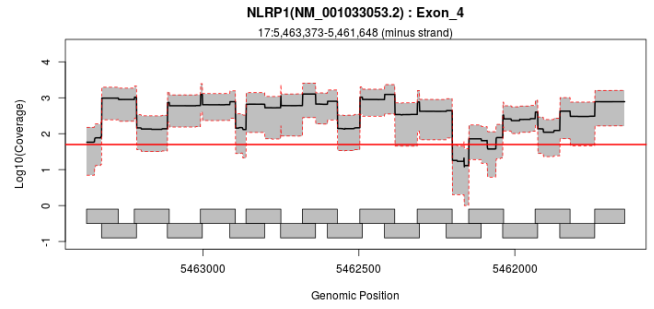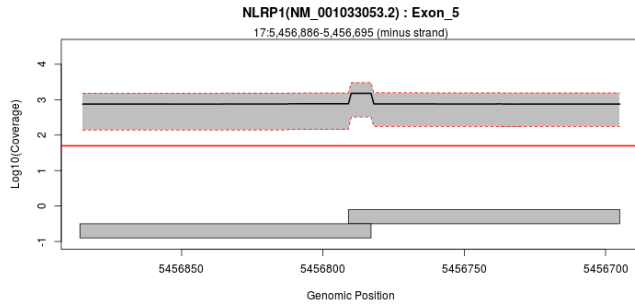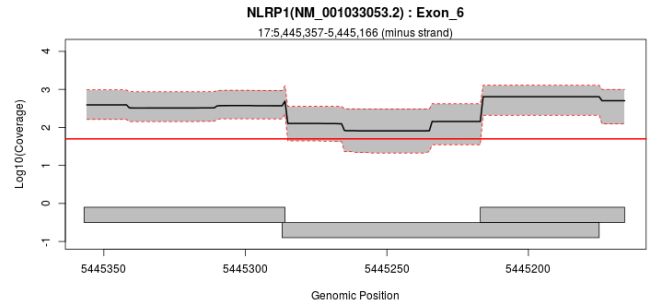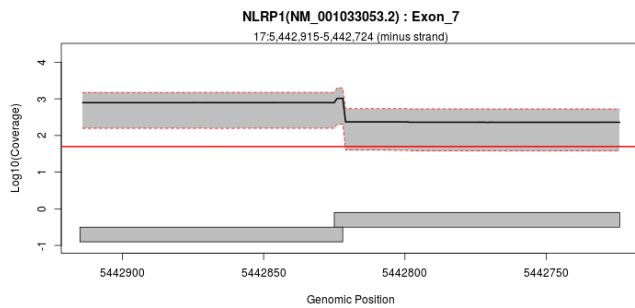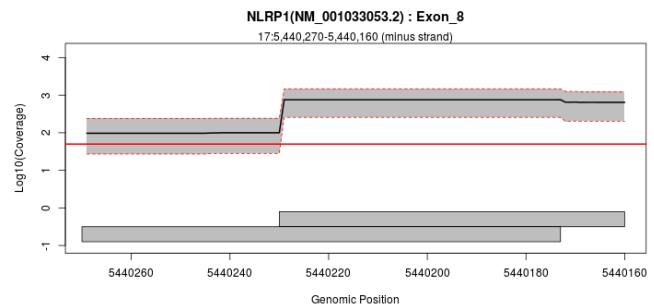

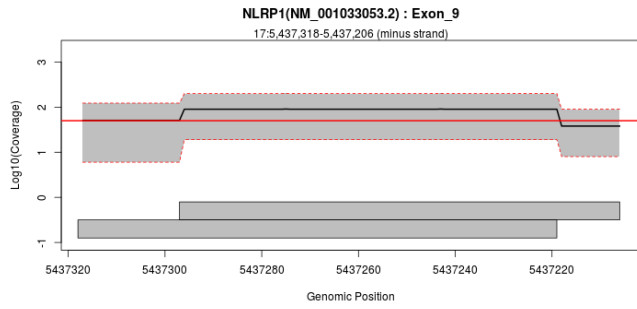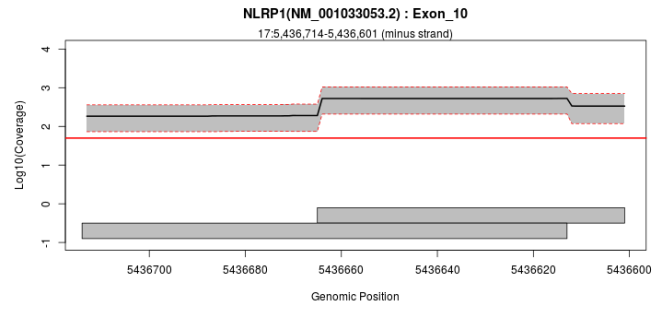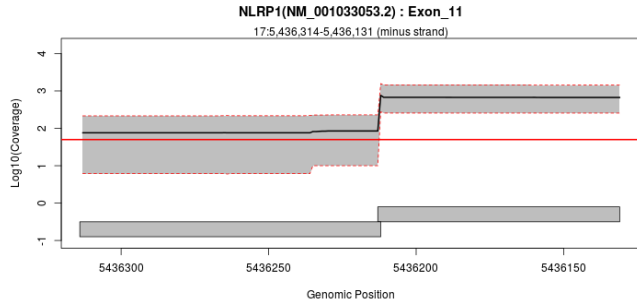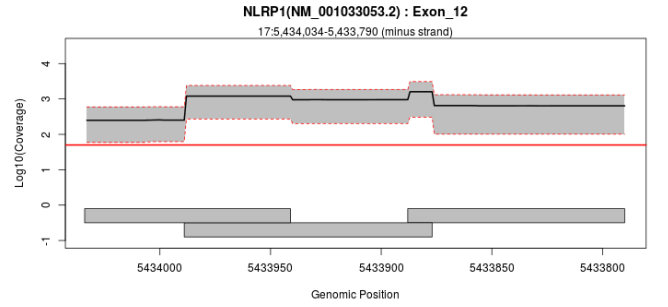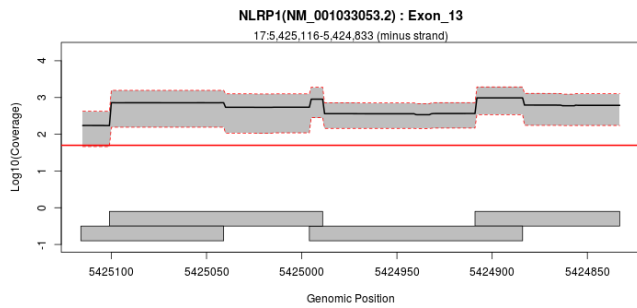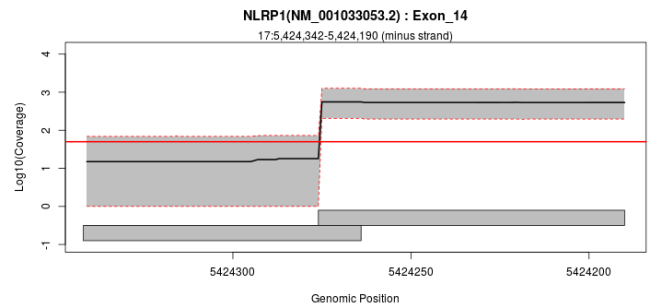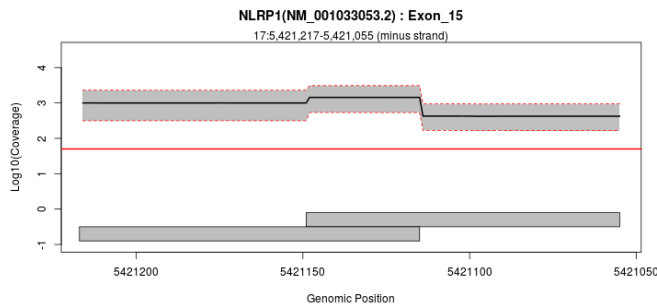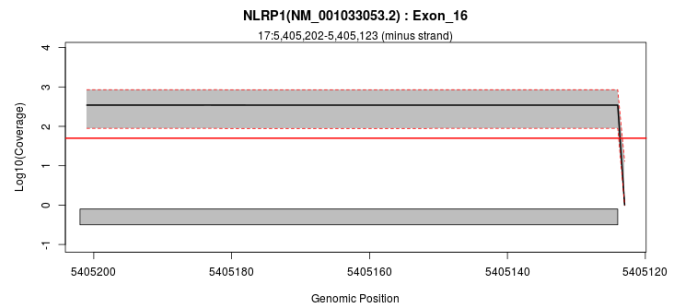

## Exon Overview: NLRP1 : NM\_014922.4

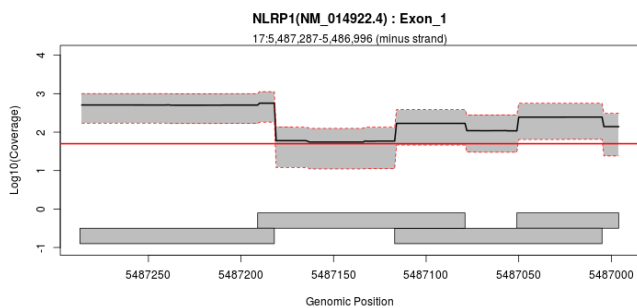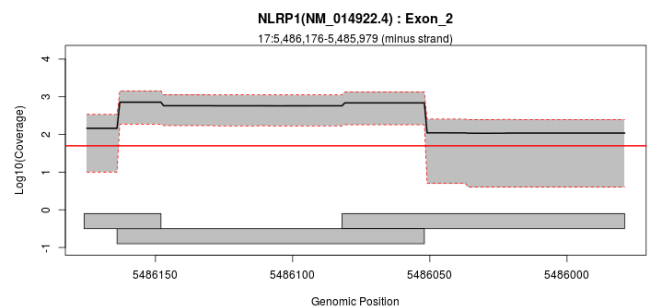

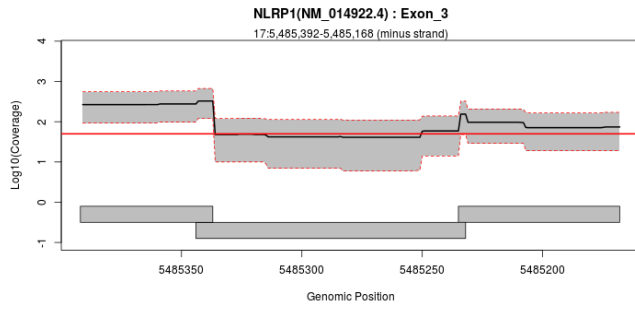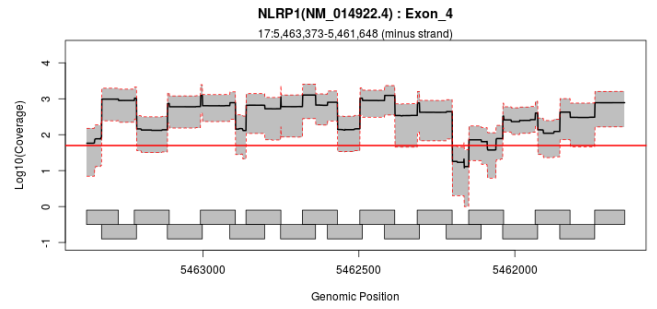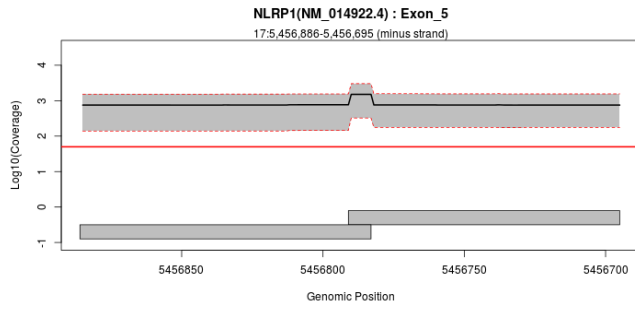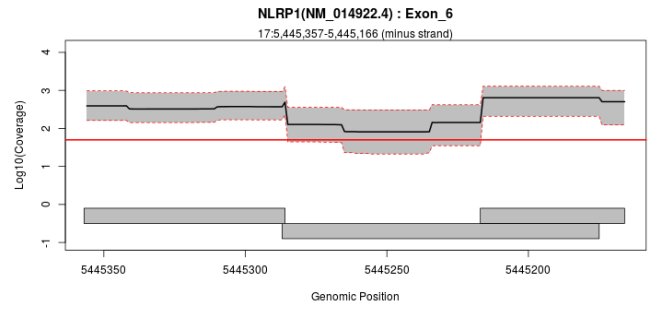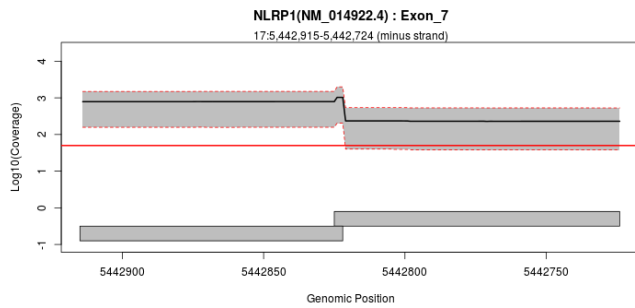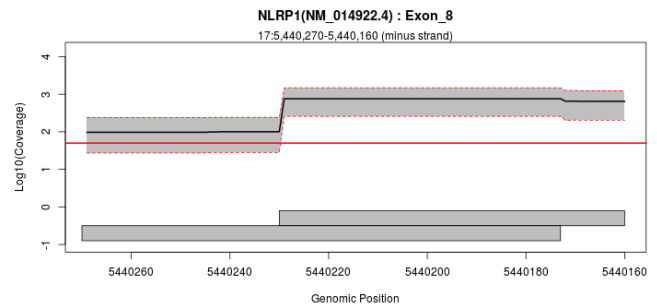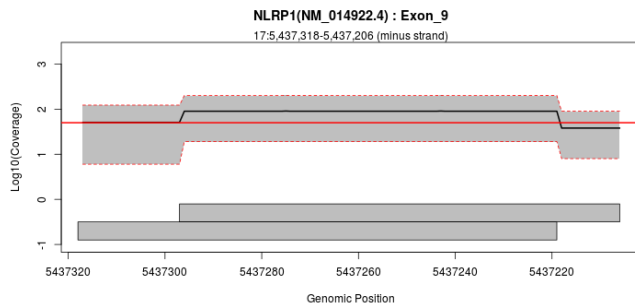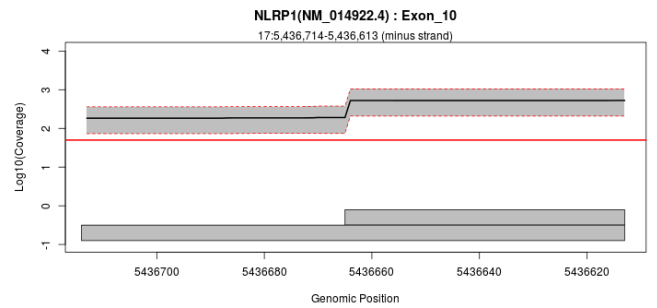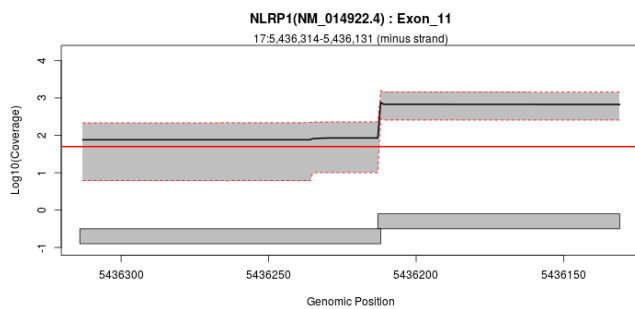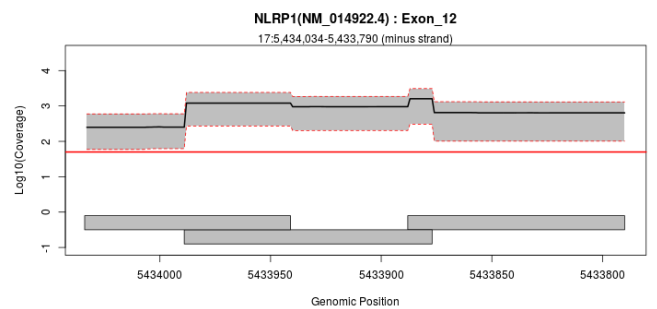

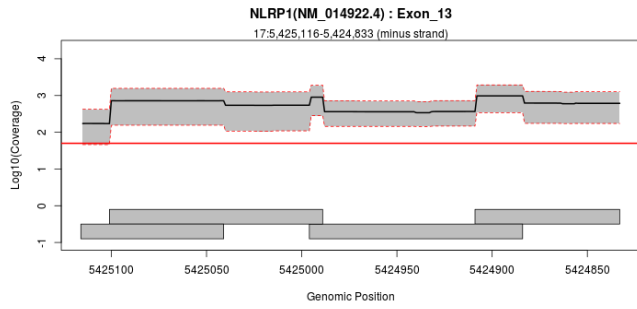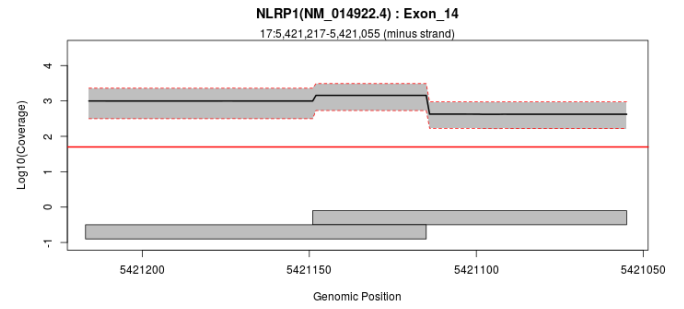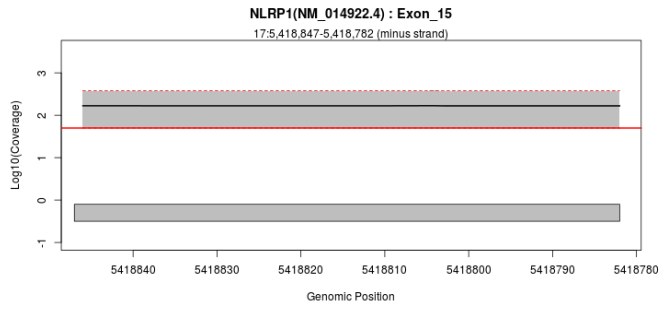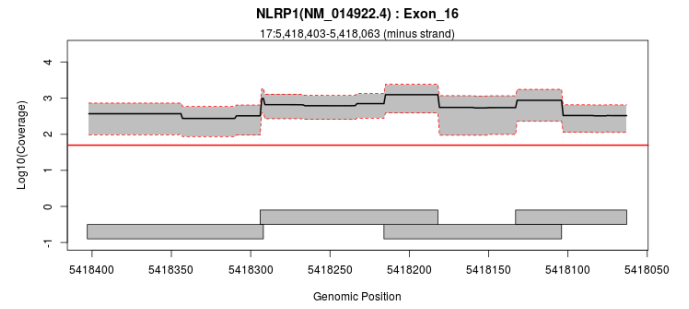

### Exon Overview: NLRP1 : NM\_033004.3

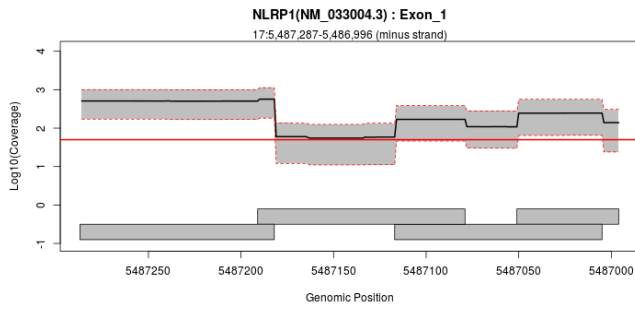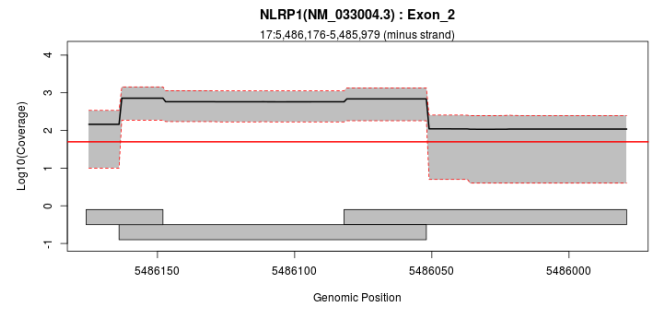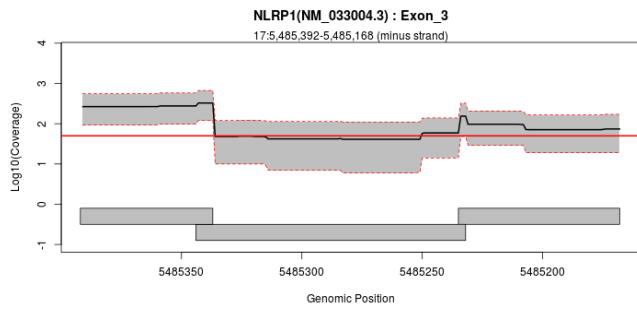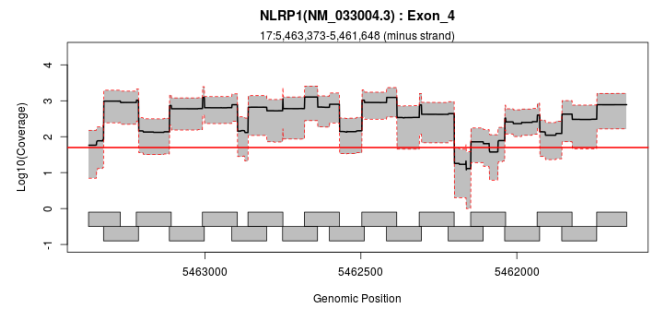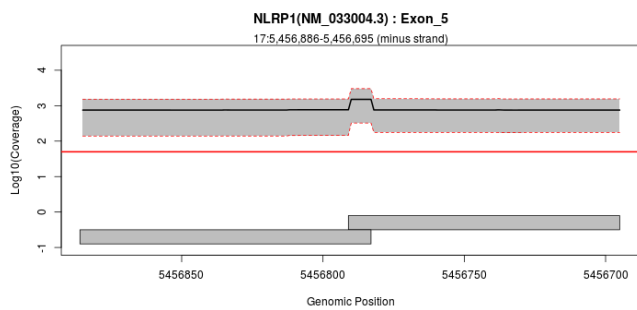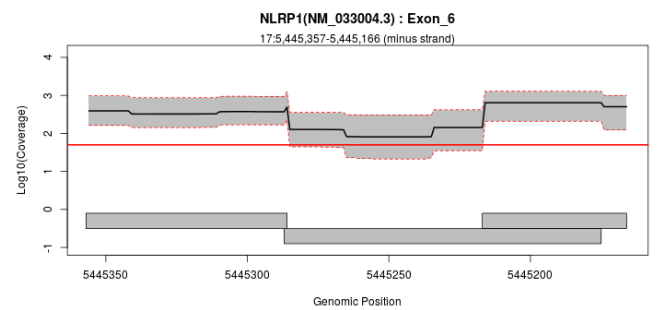



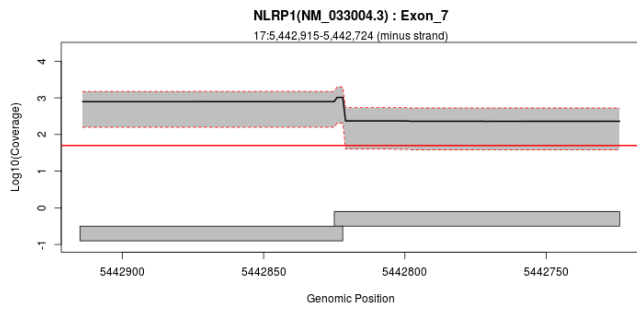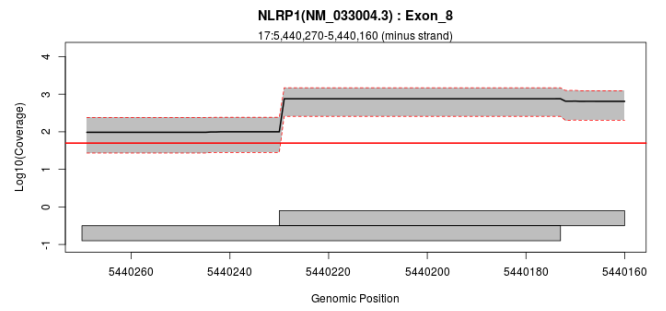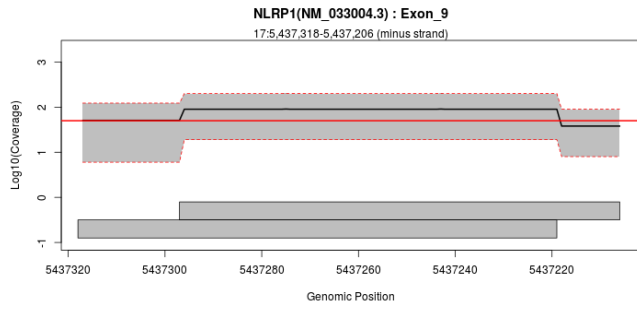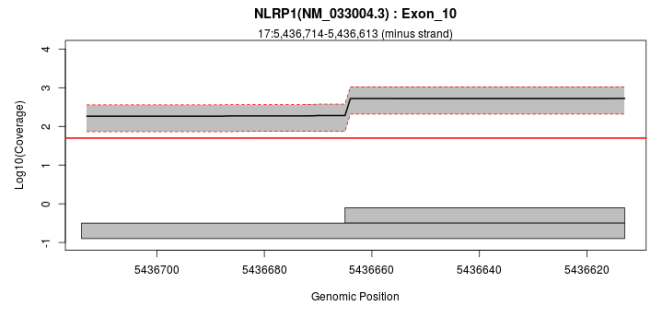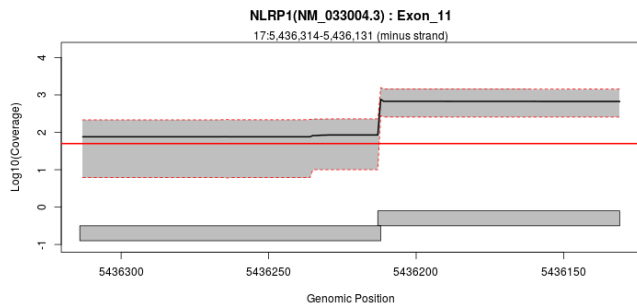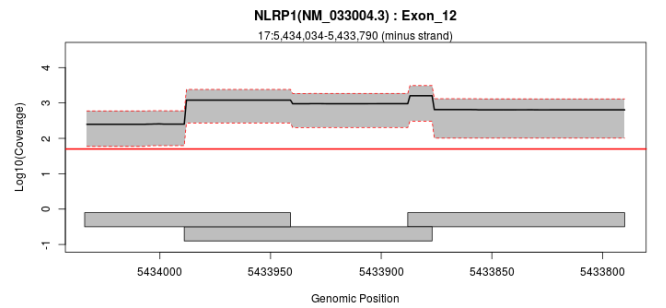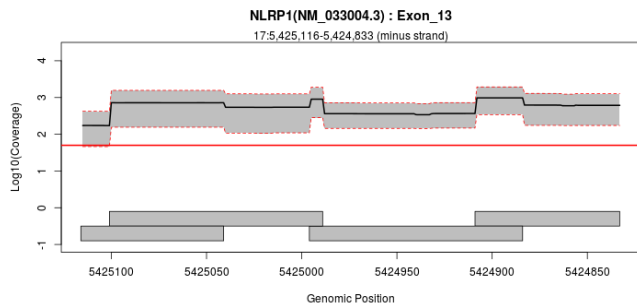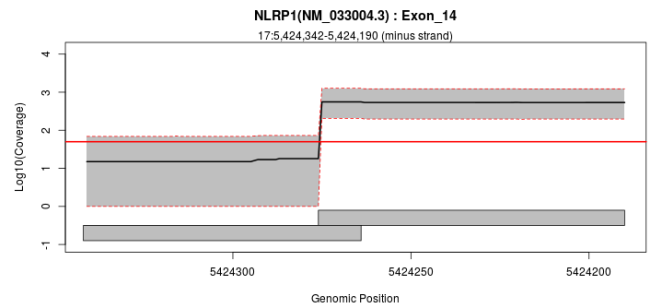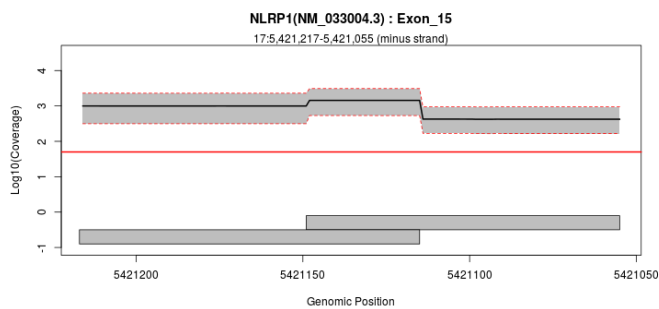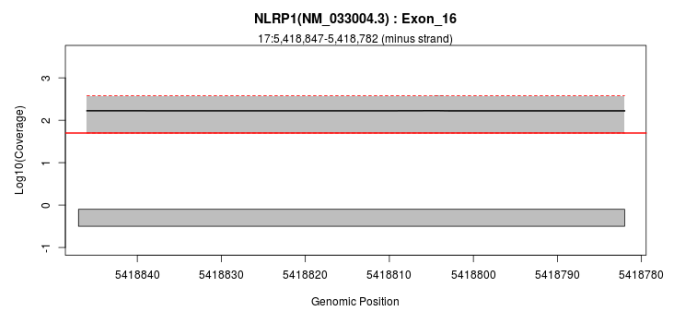

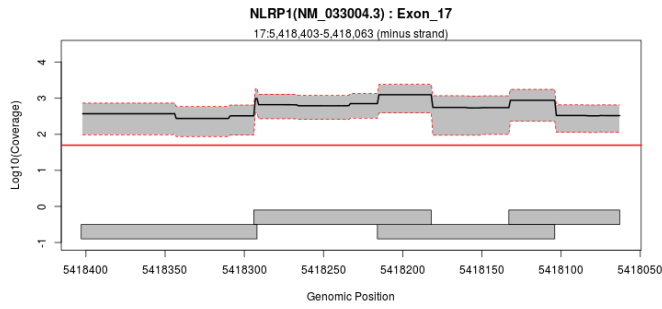

## Exon Overview: NLRP1 : NM\_033006.3

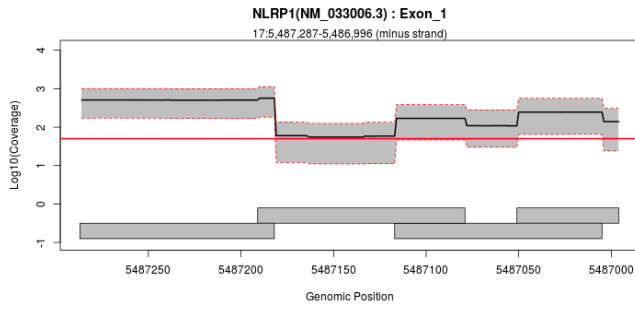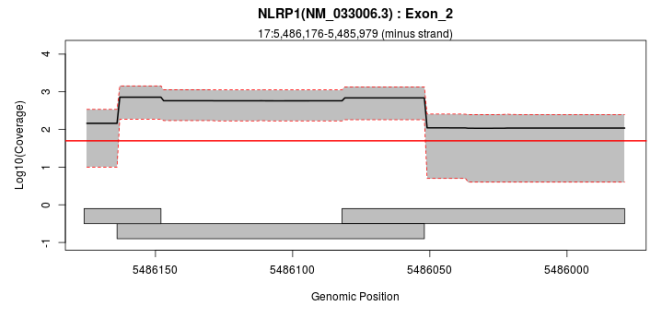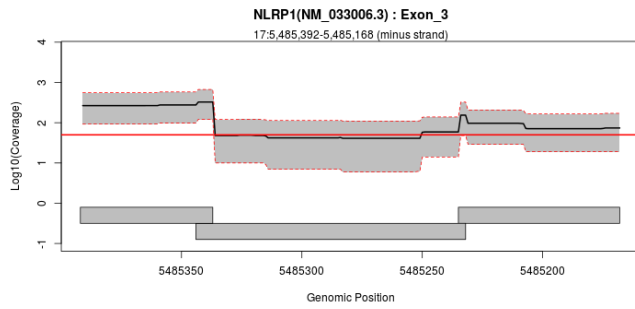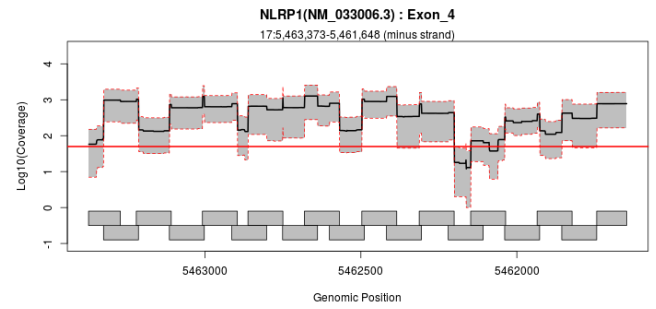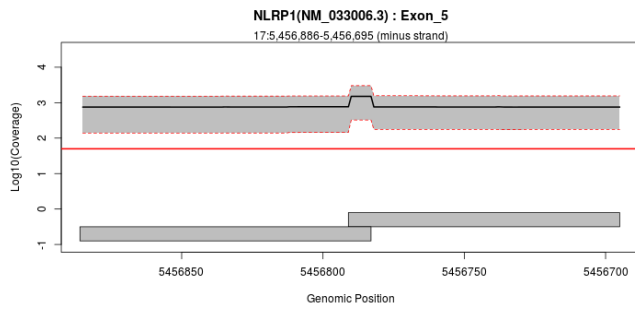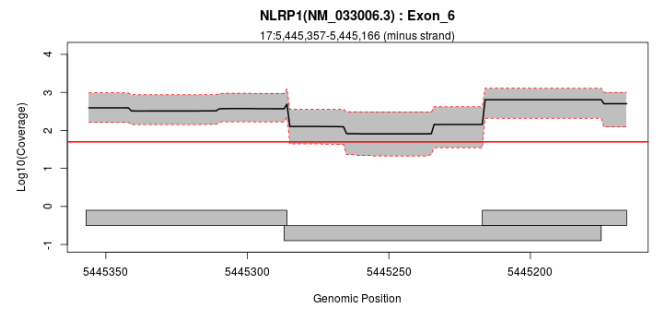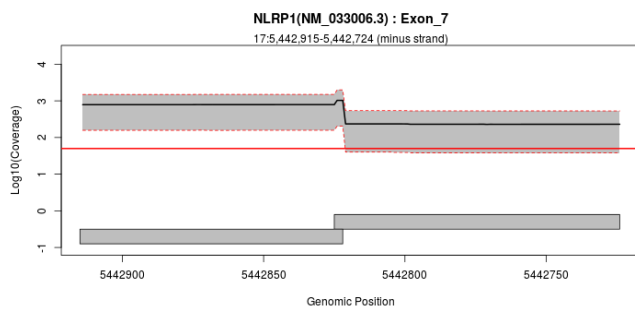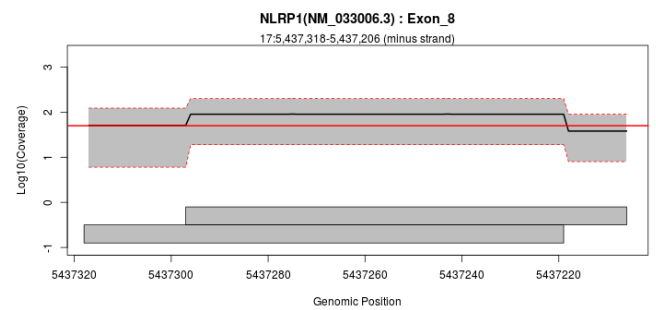

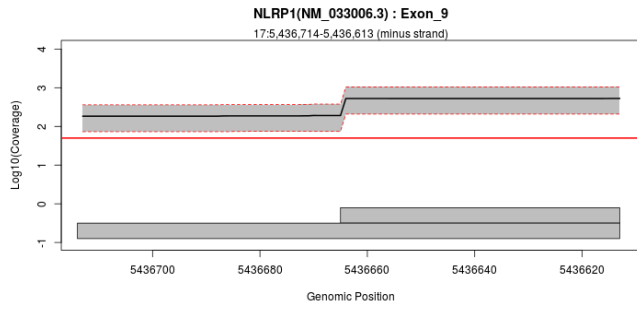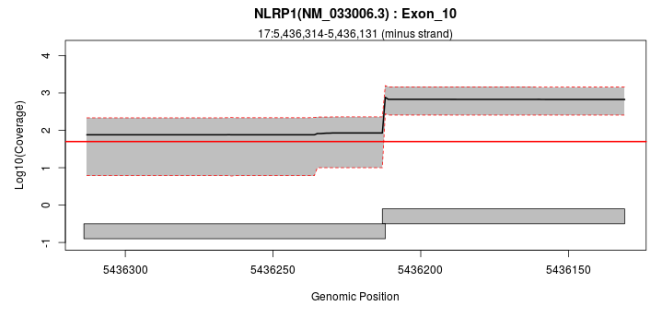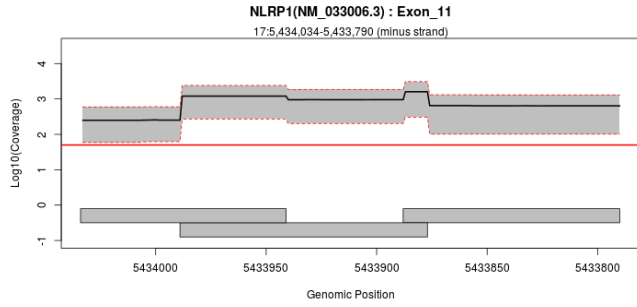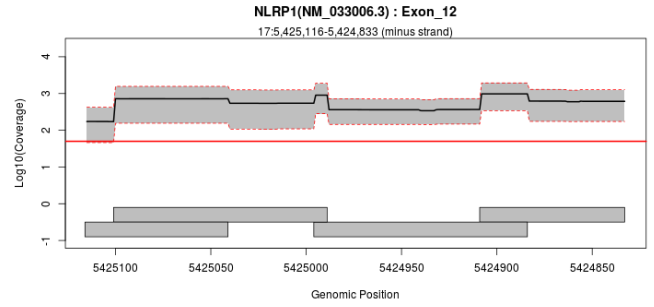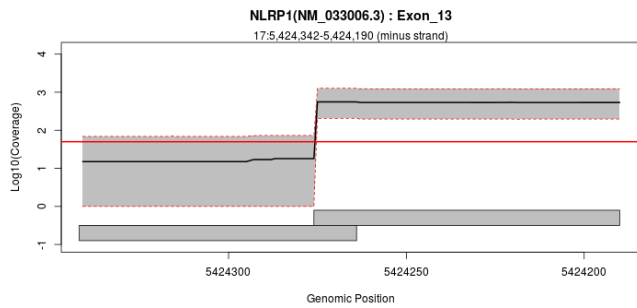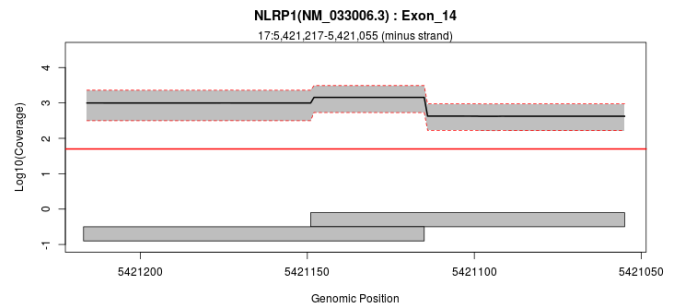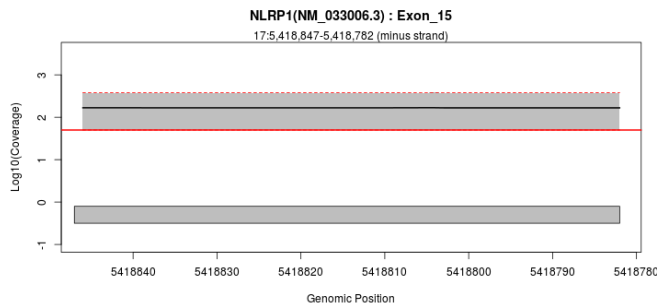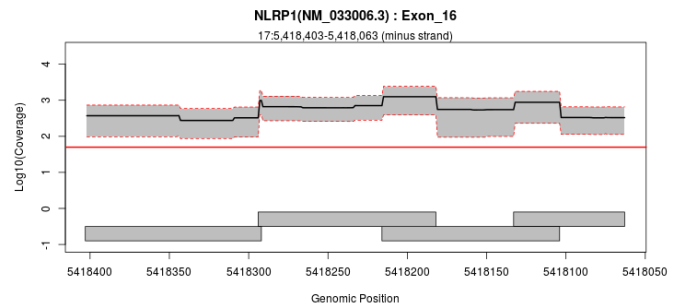

## Exon Overview: NLRP1 : NM\_033007.3

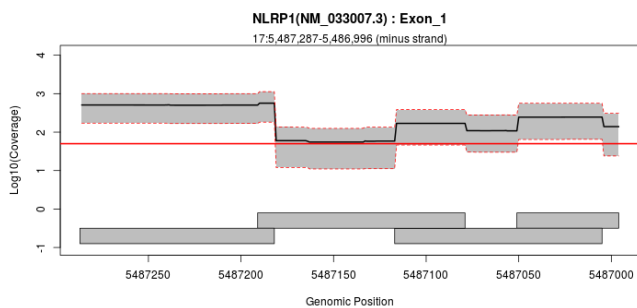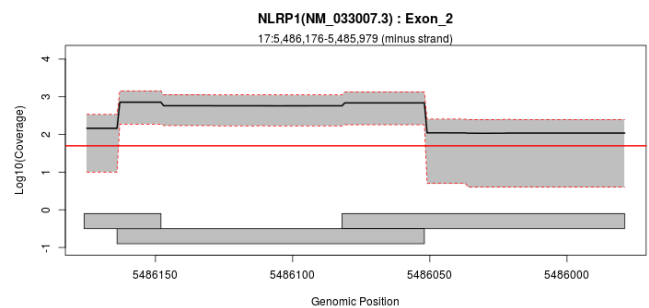

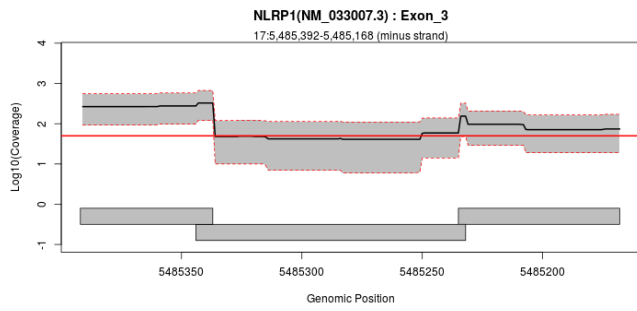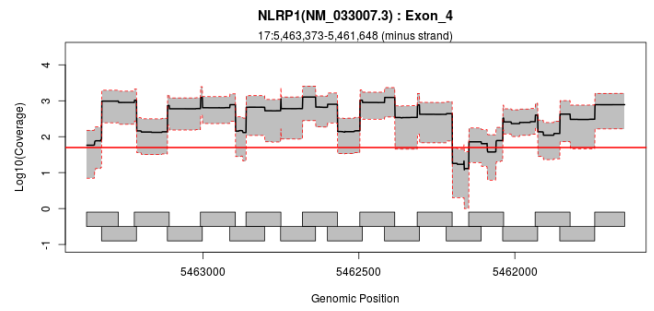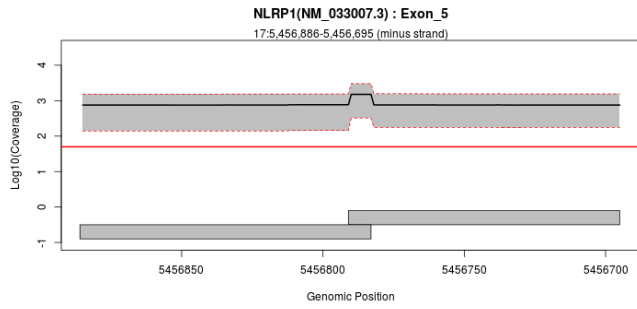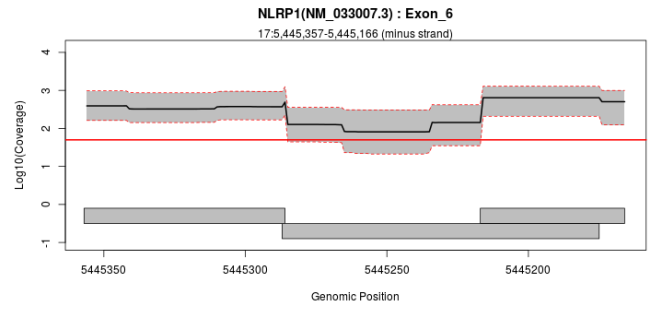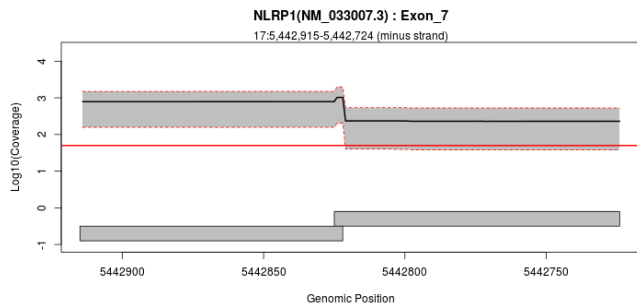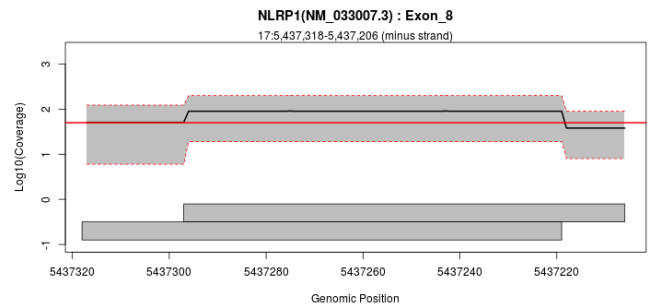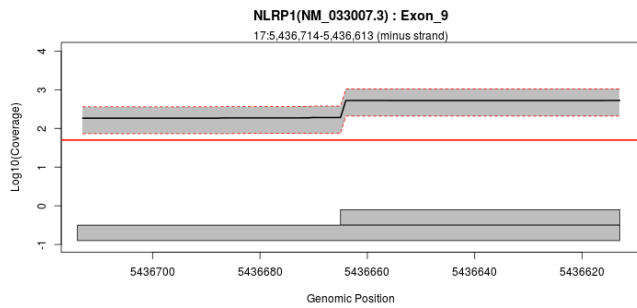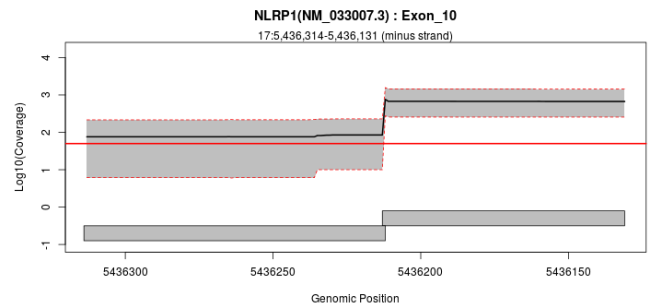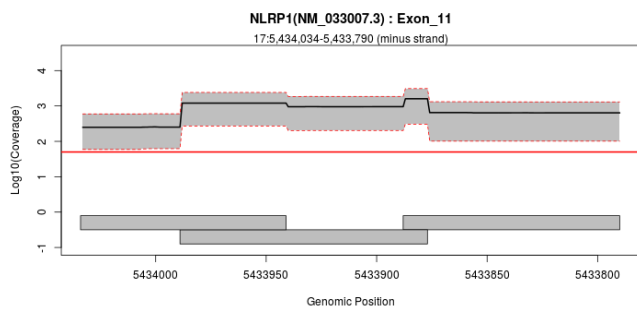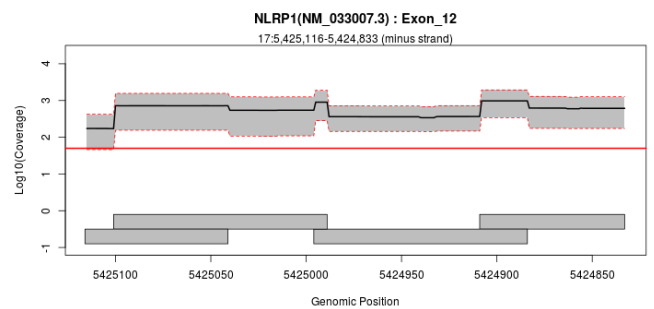

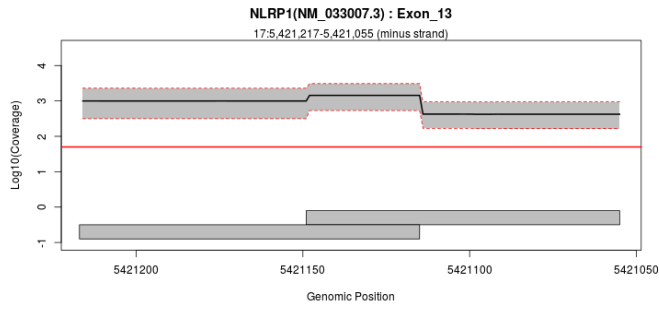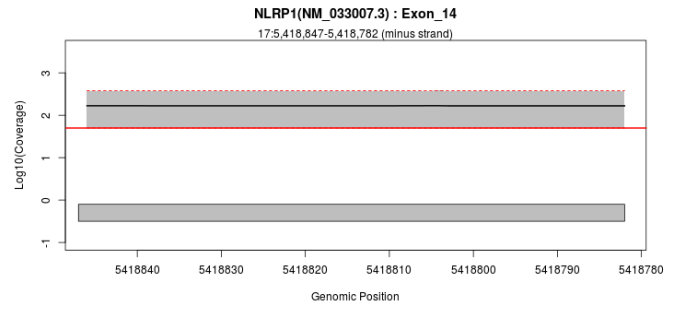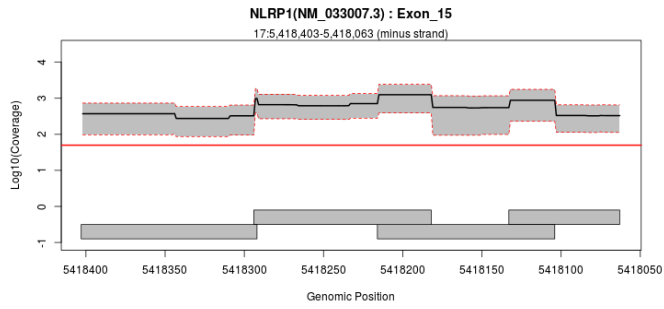

## Exon Overview: P3H4 : NM\_006455.2

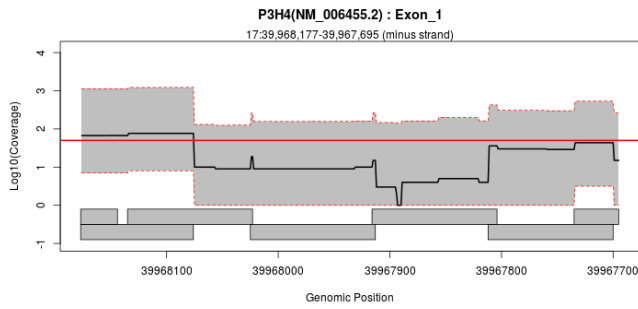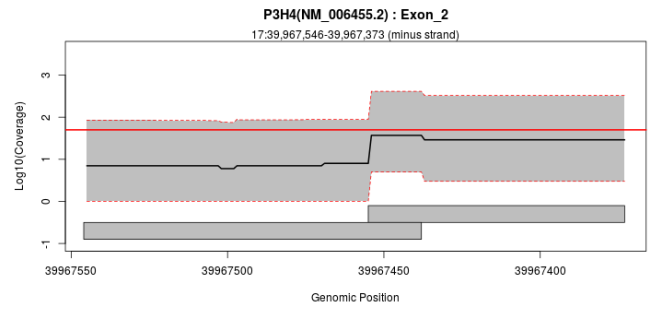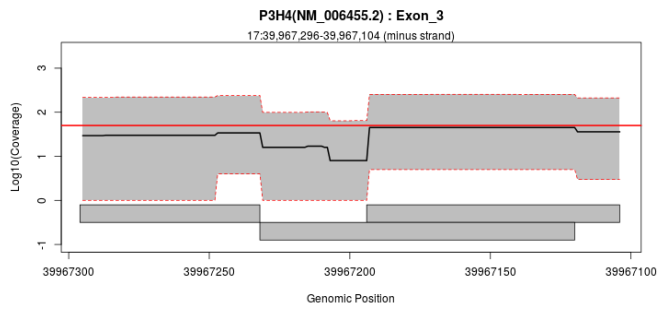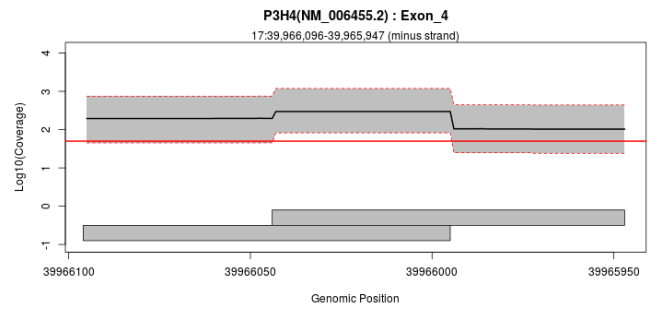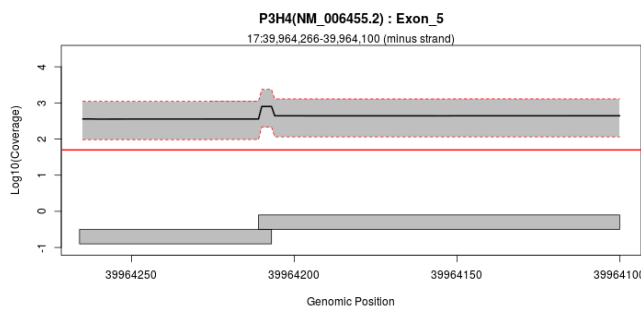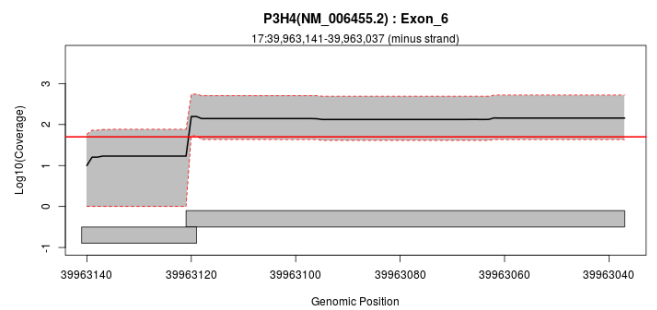

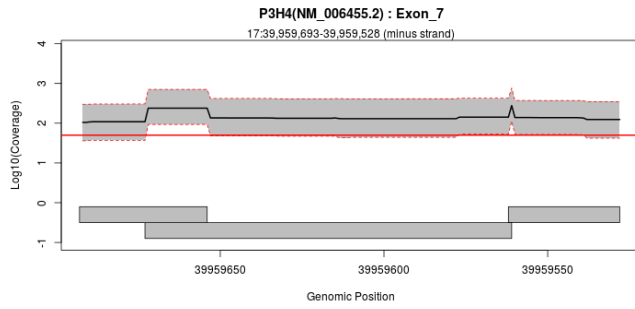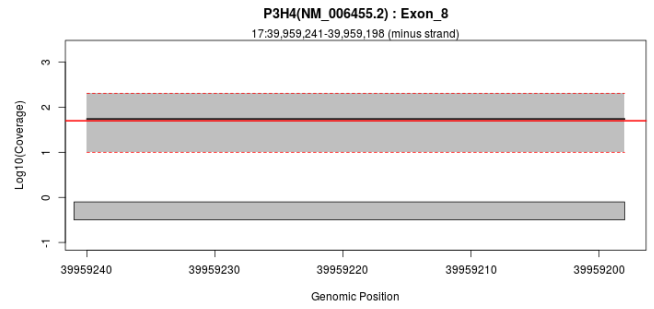

## Exon Overview: PARP1 : NM\_001618.3

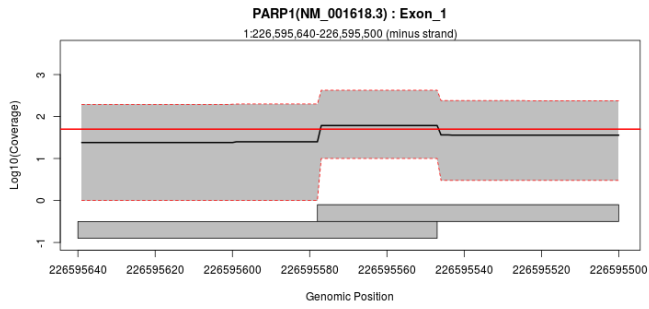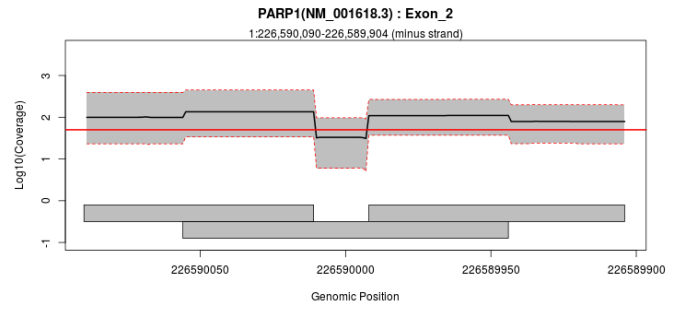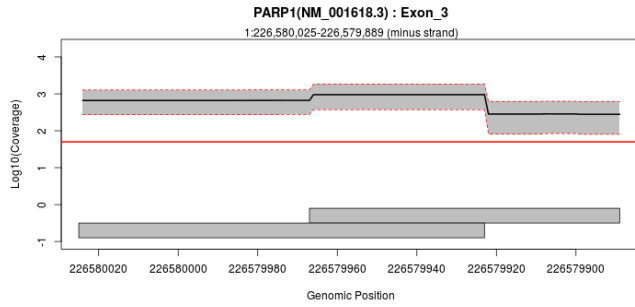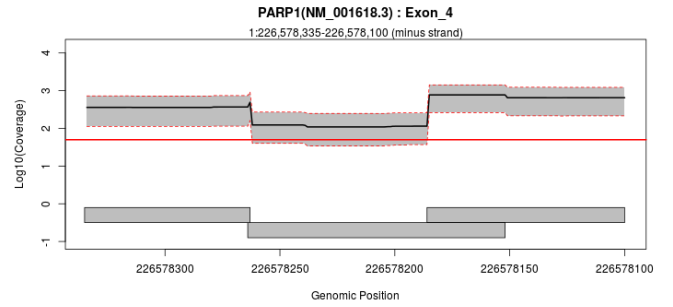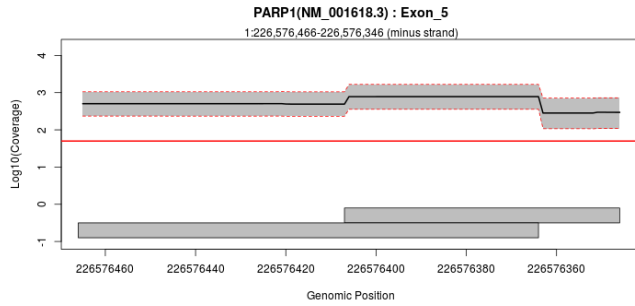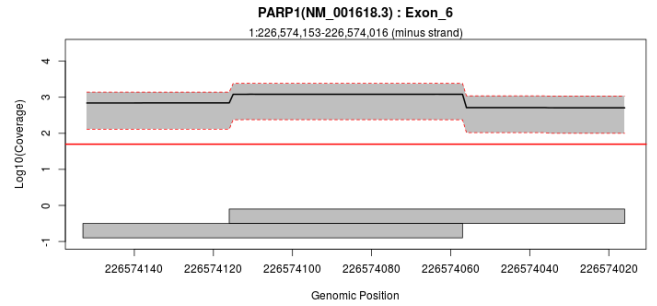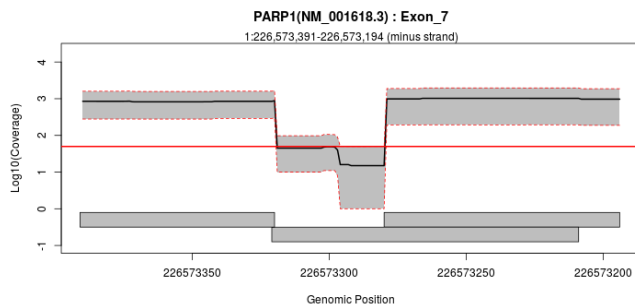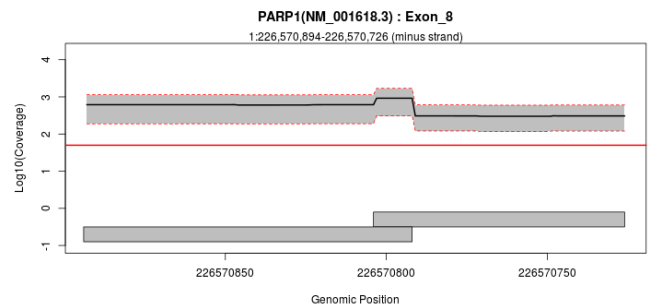

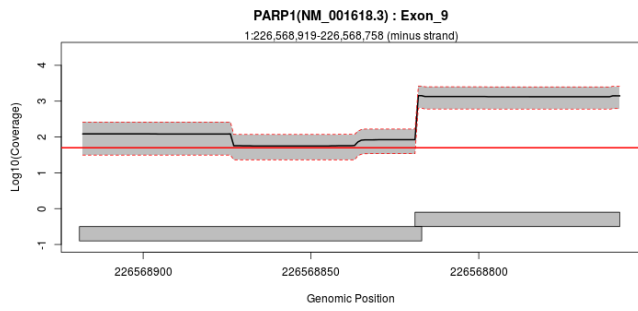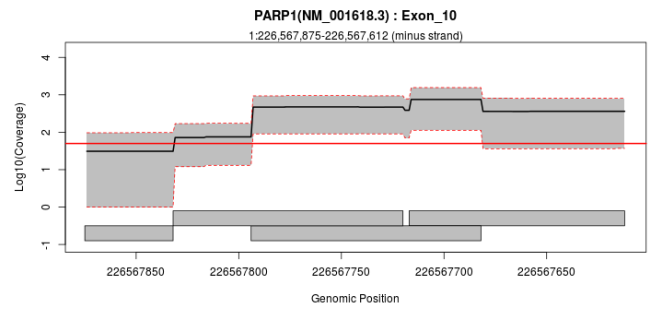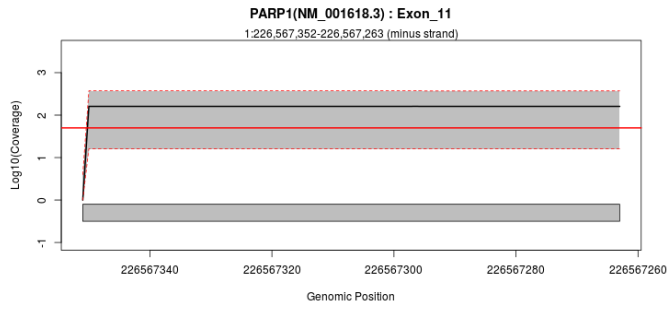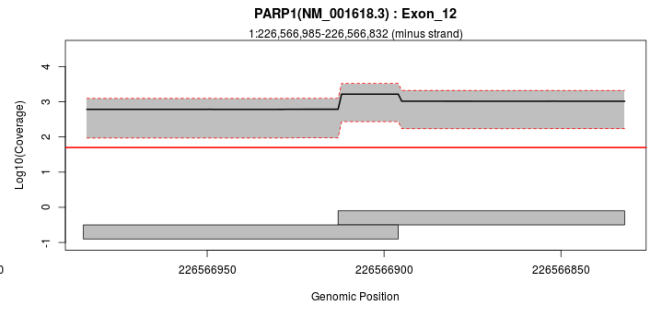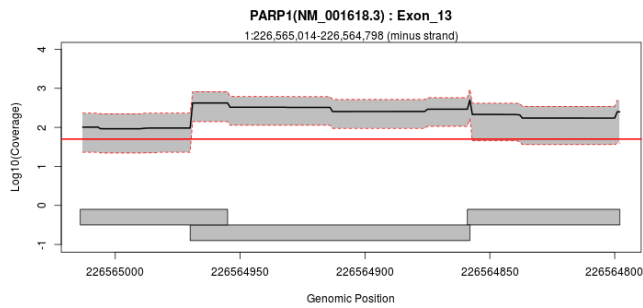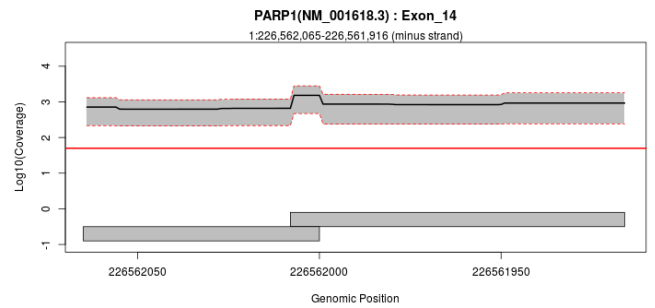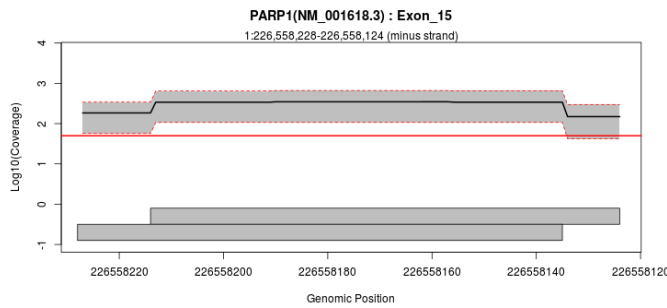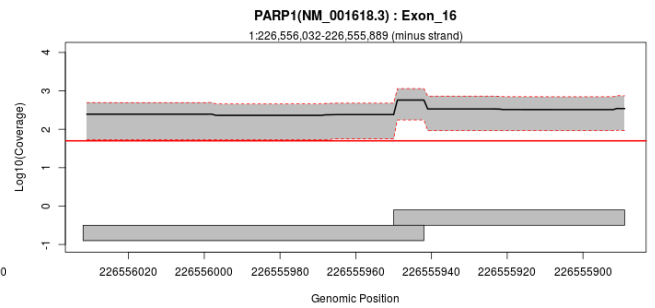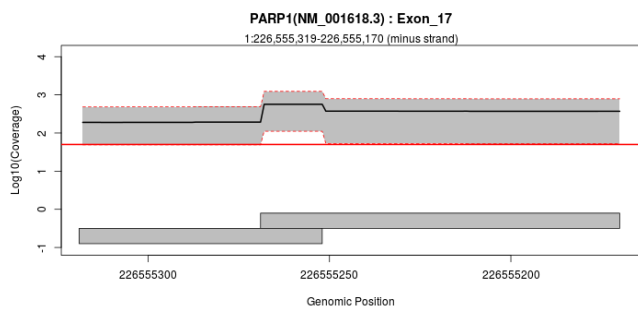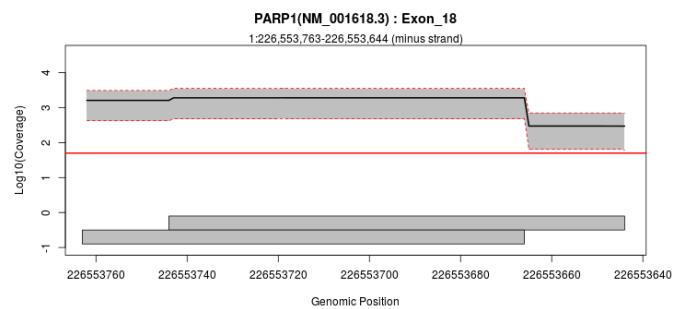

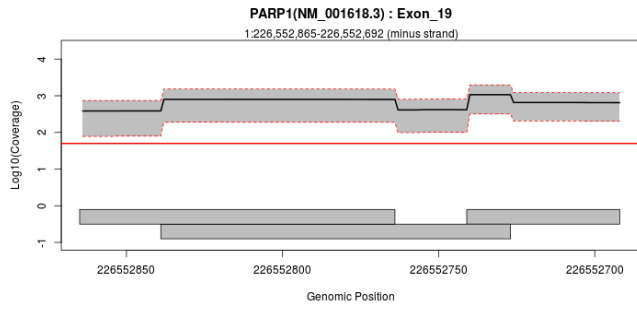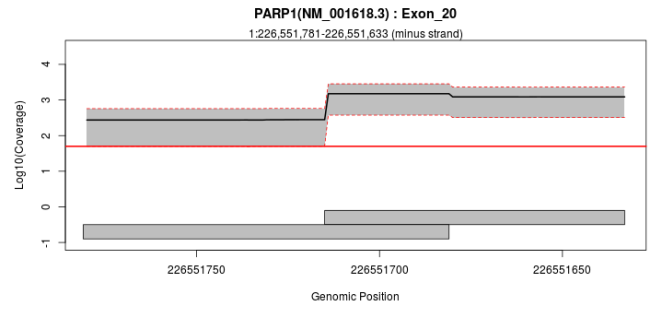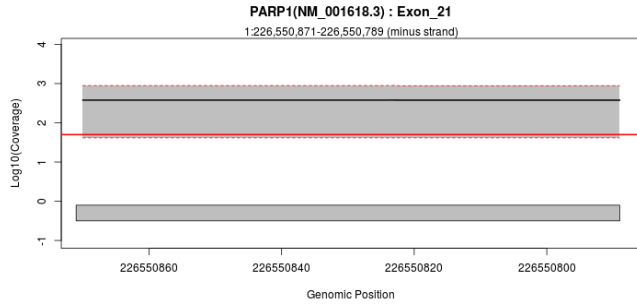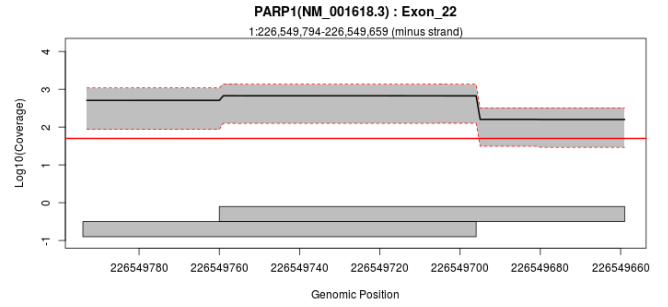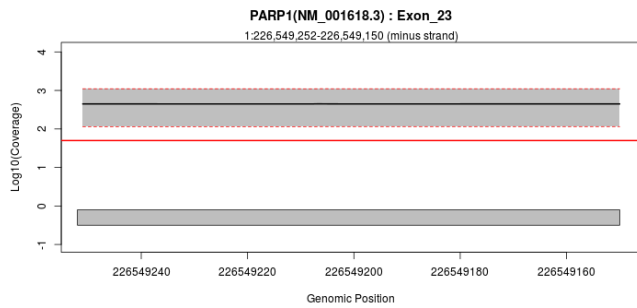

## Exon Overview: PARP2 : NM\_001042618.1

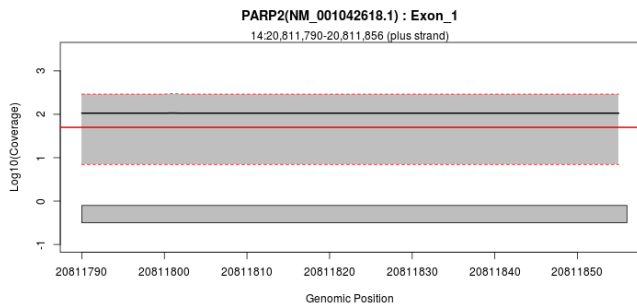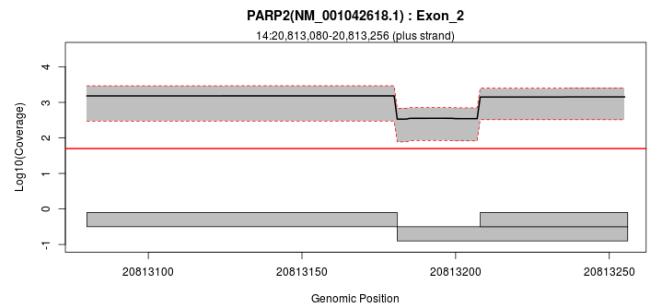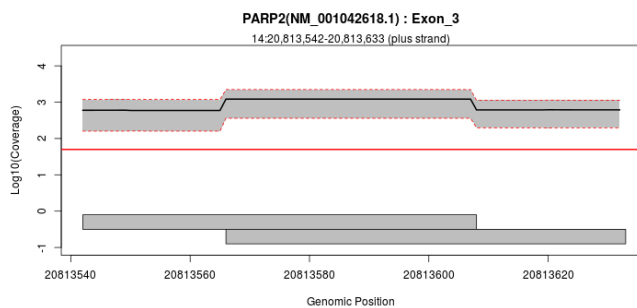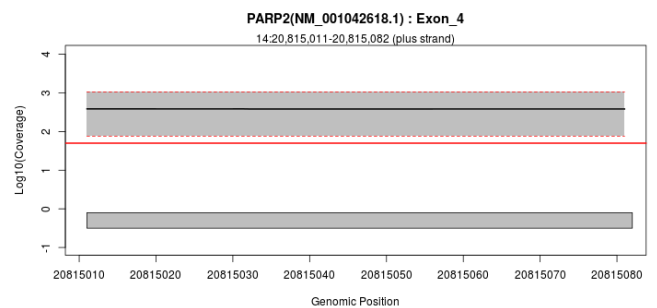



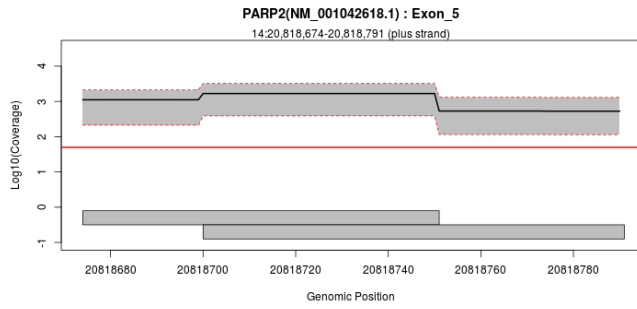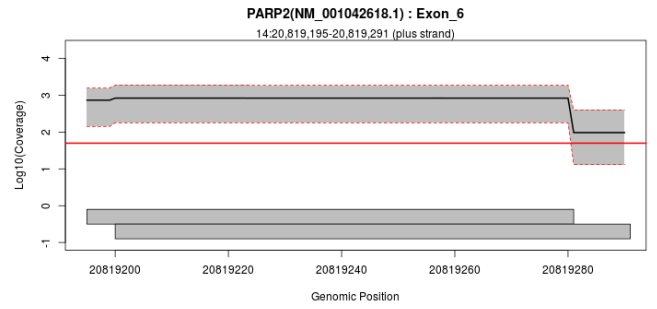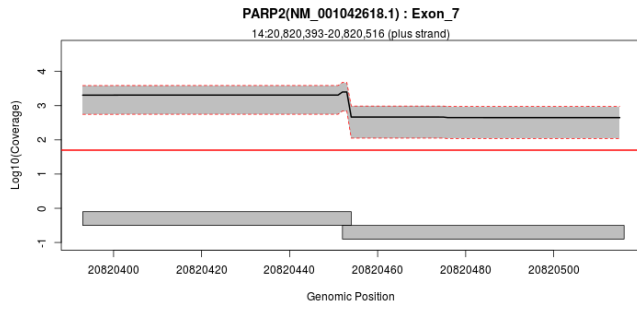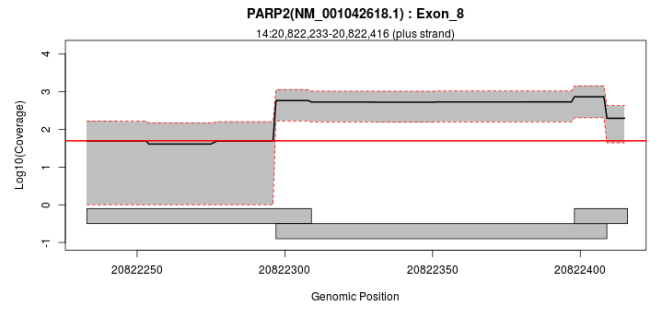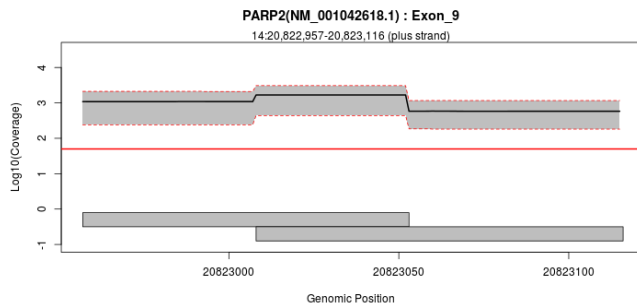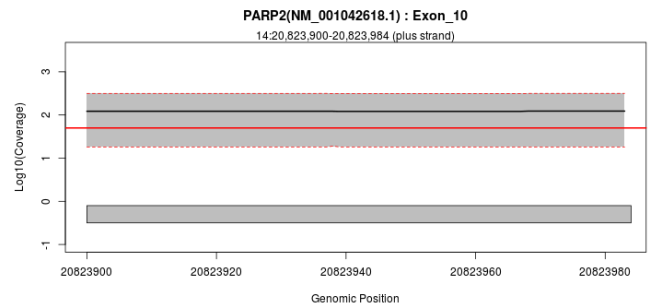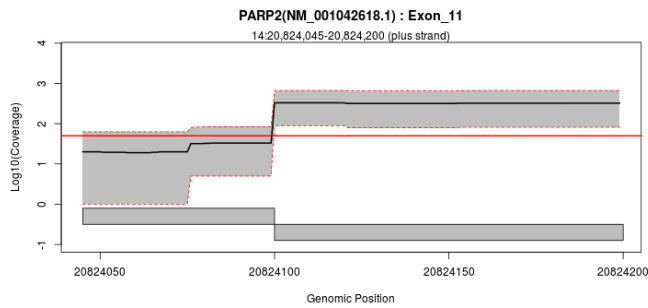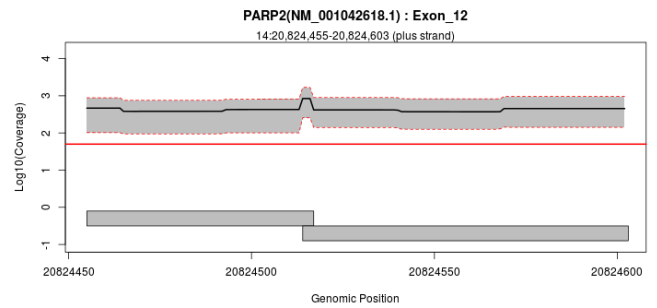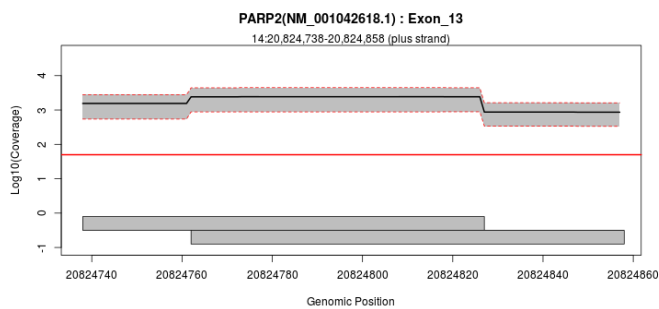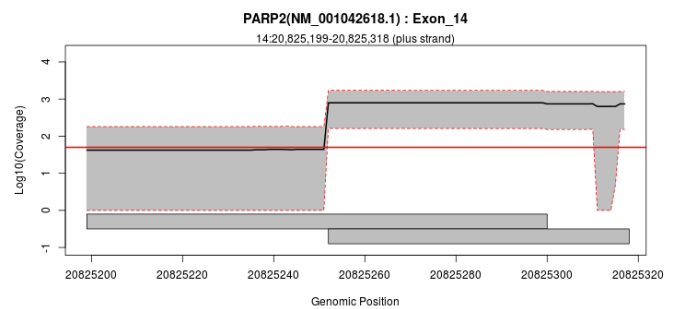

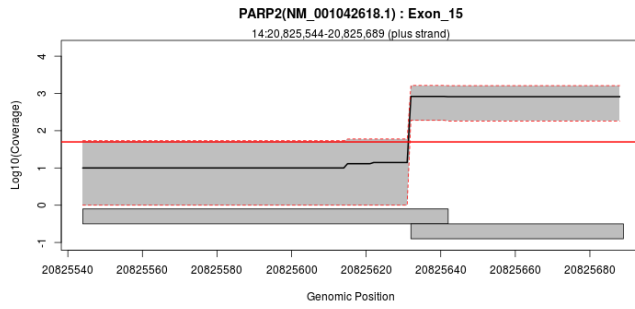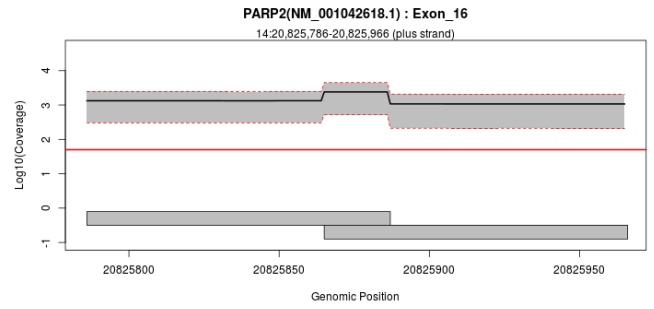

## Exon Overview: PARP2 : NM\_005484.3

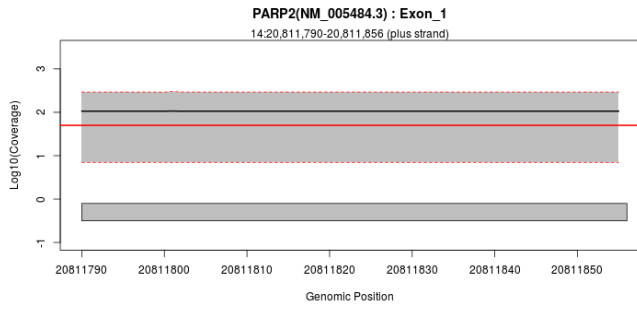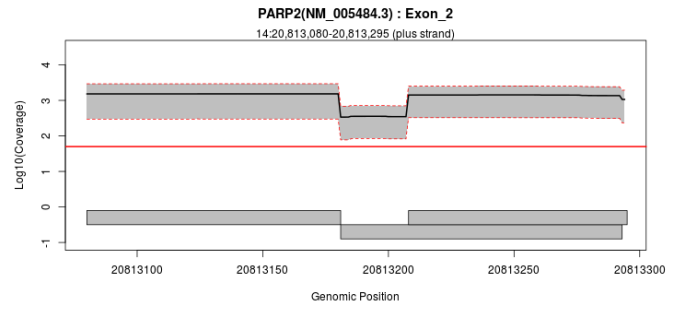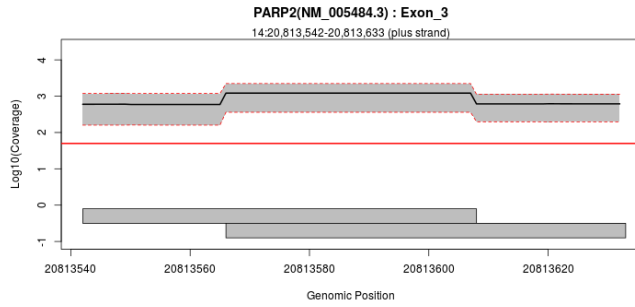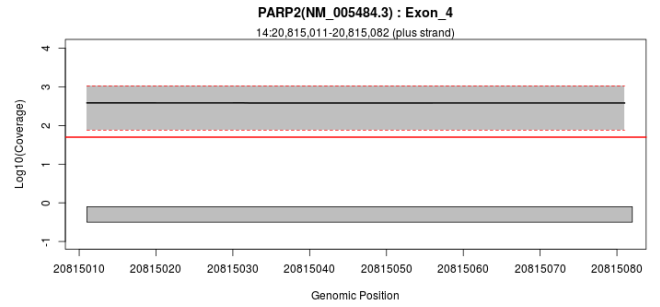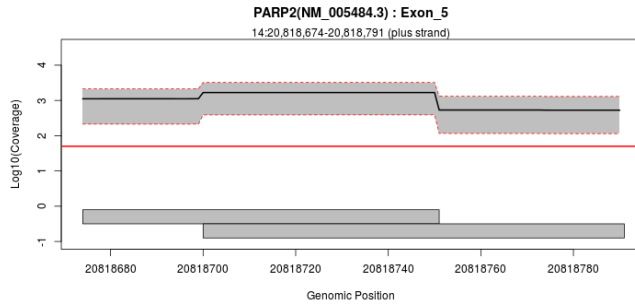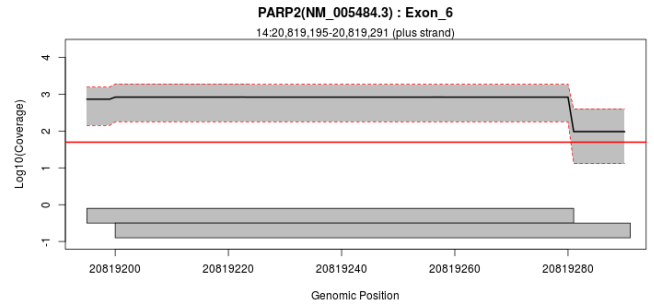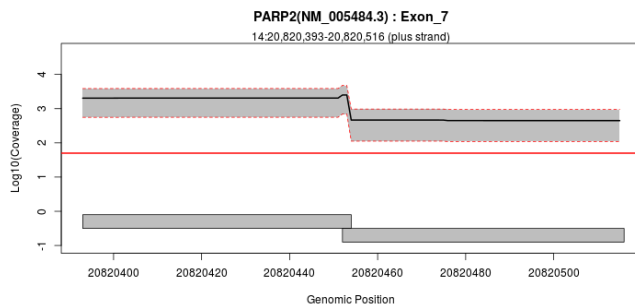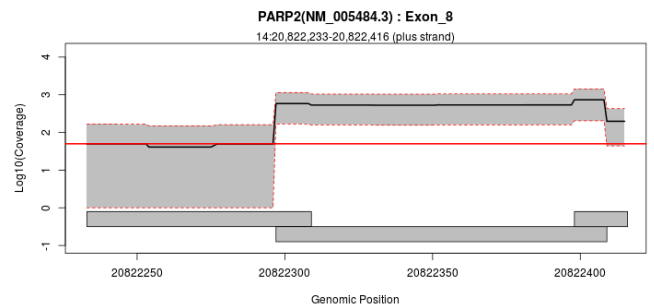

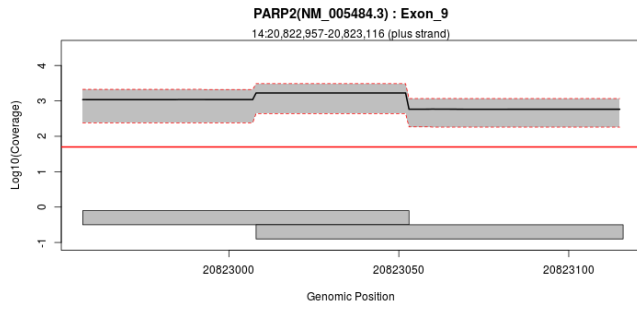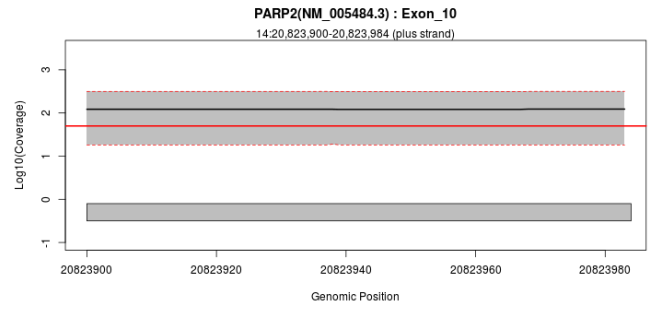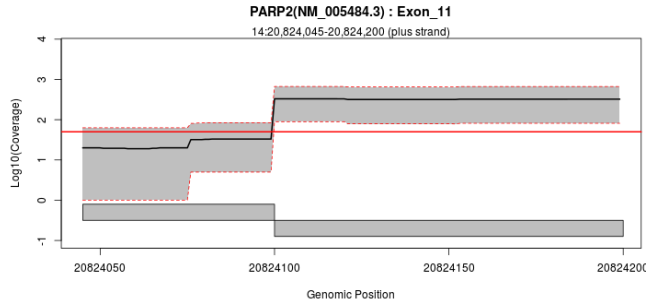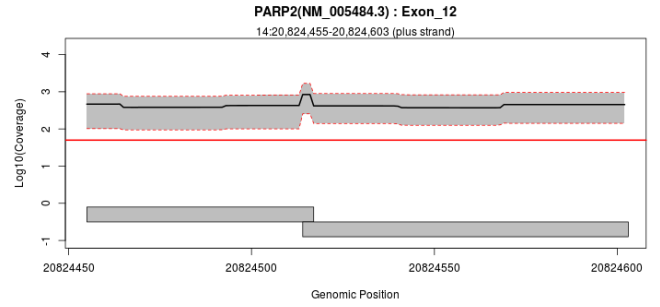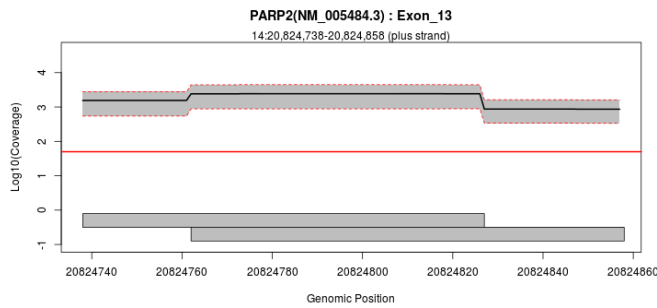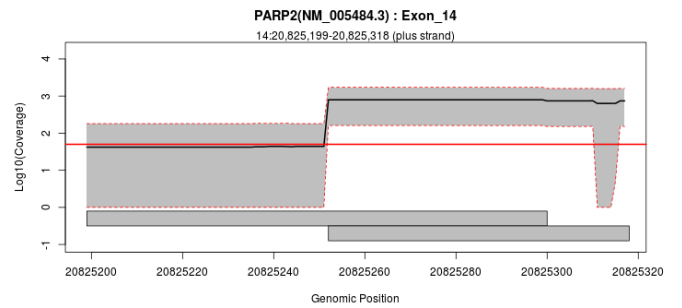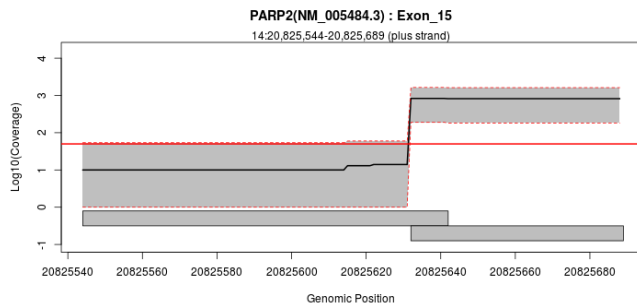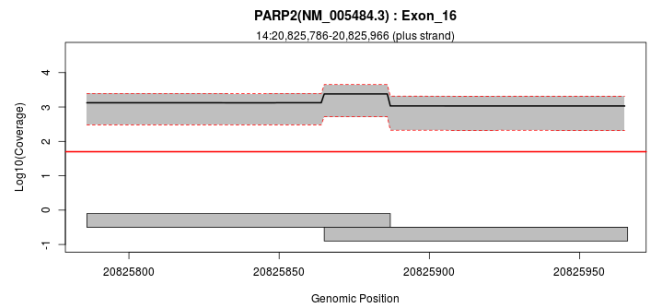

## Exon Overview: PRPH2 : NM\_000322.4

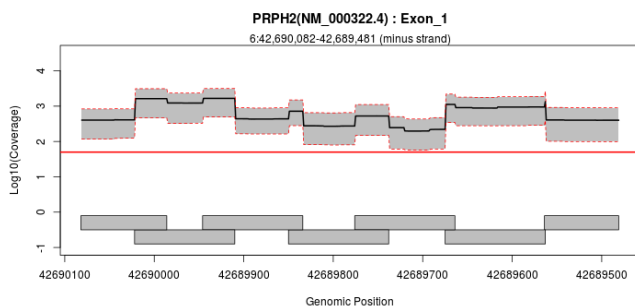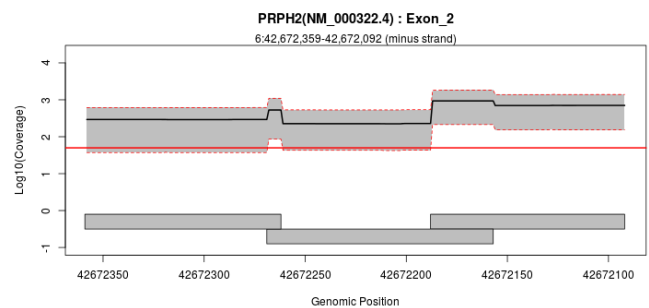

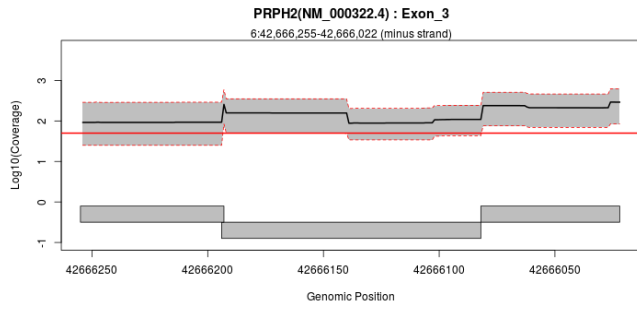

## Exon Overview: RDH13 : NM\_001145971.1

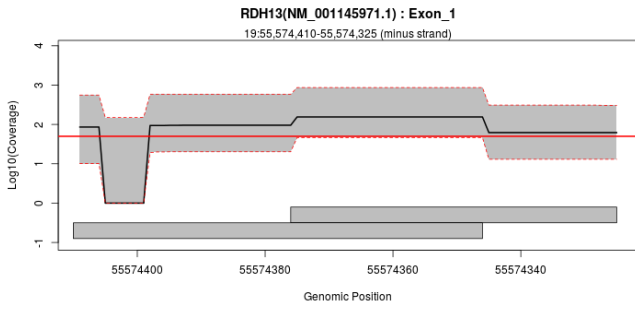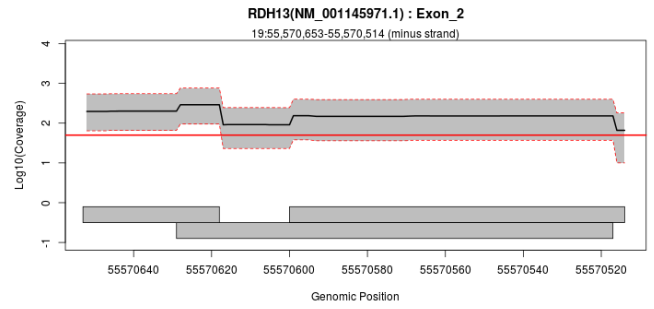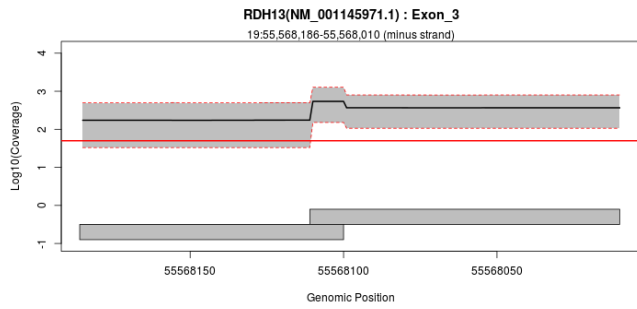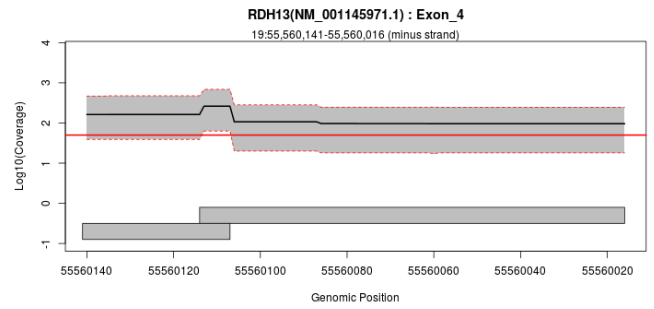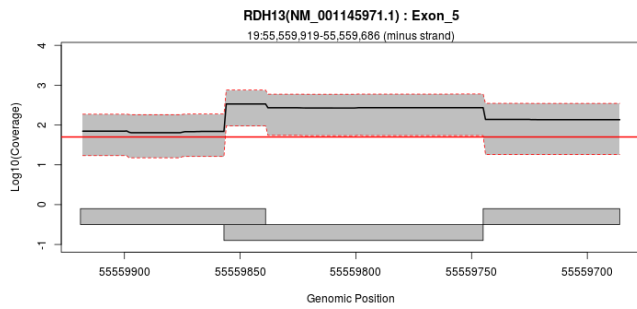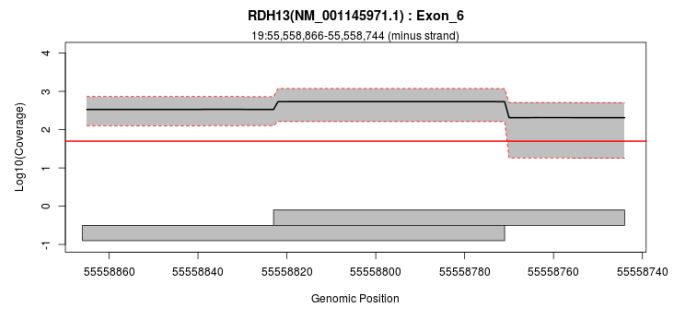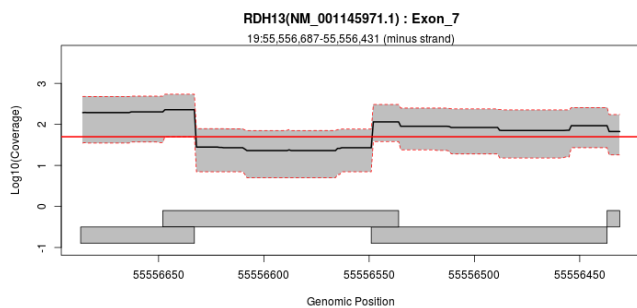

## Exon Overview: RDH13 : NM\_138412.3

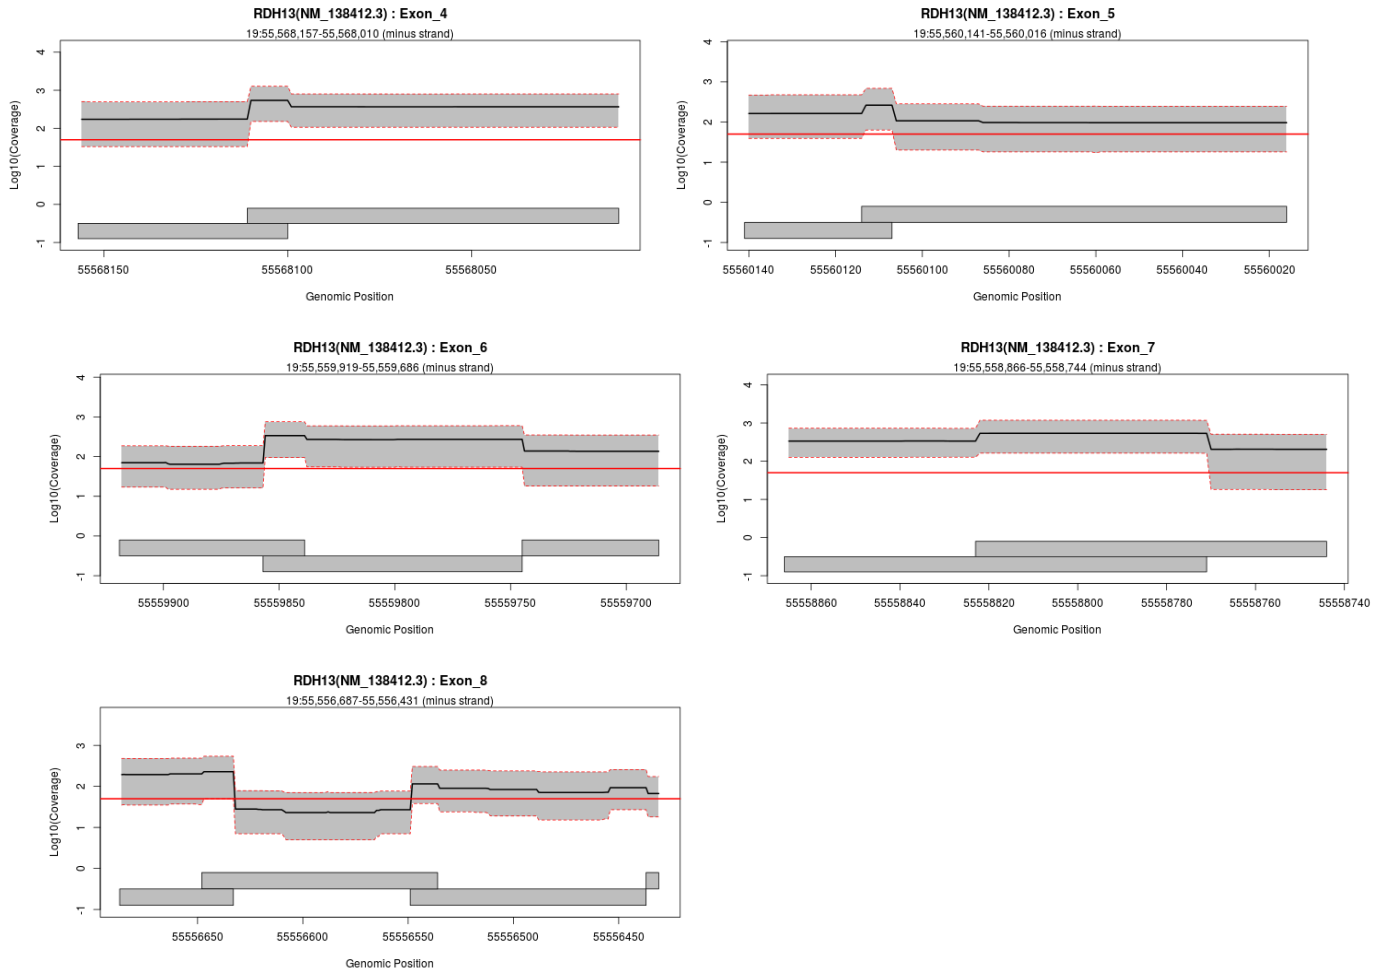

## Exon Overview: SLC4A11 : NM\_001174089.1

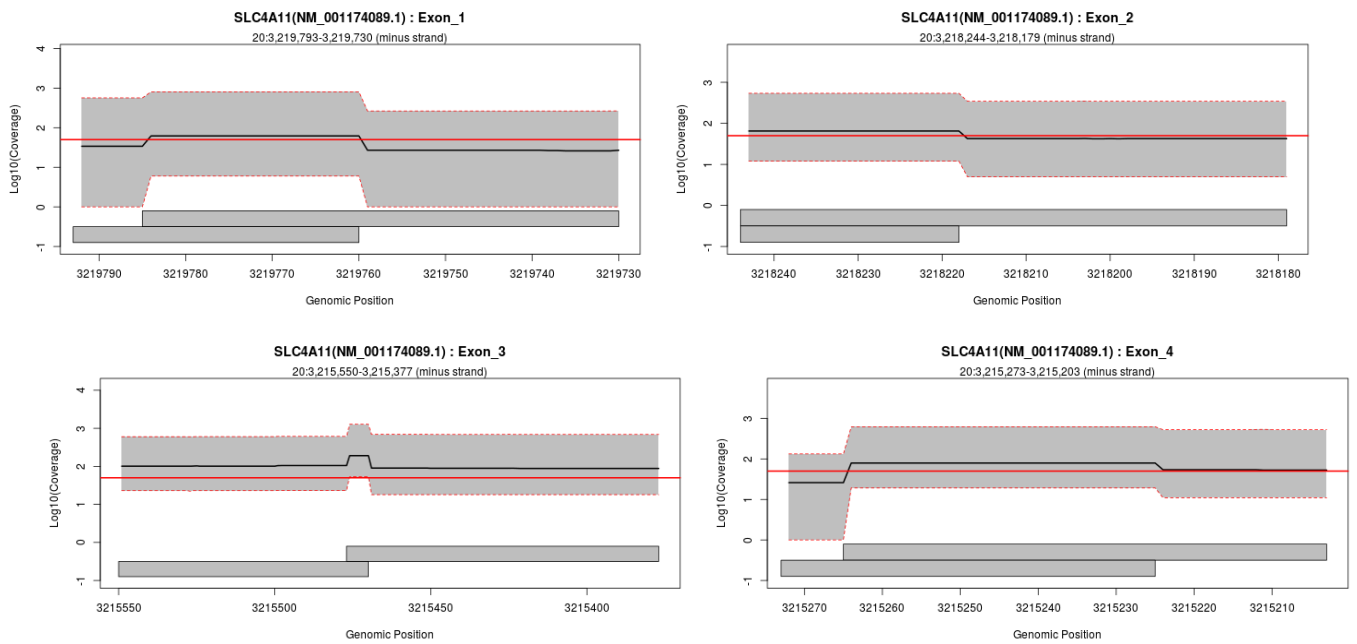

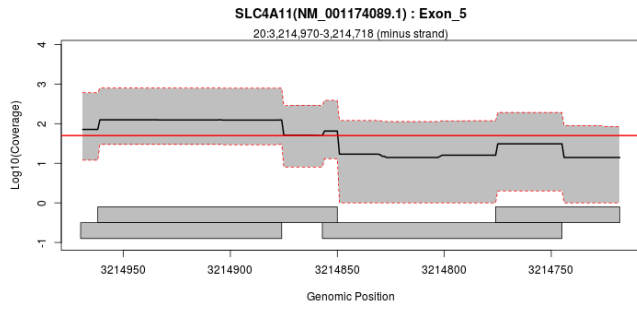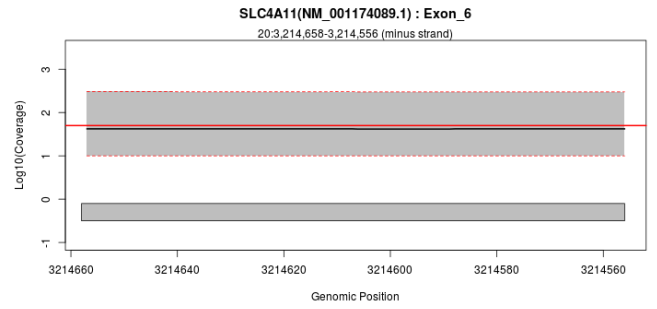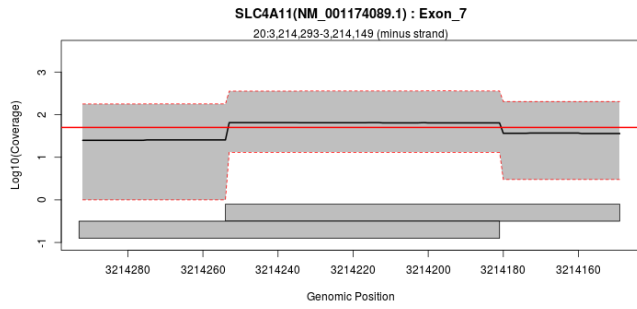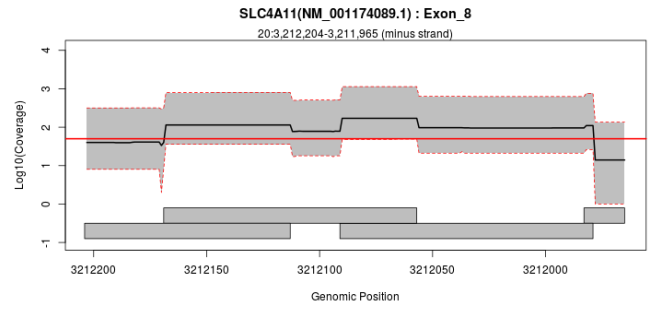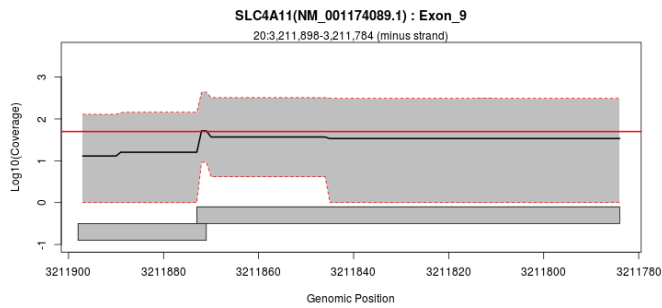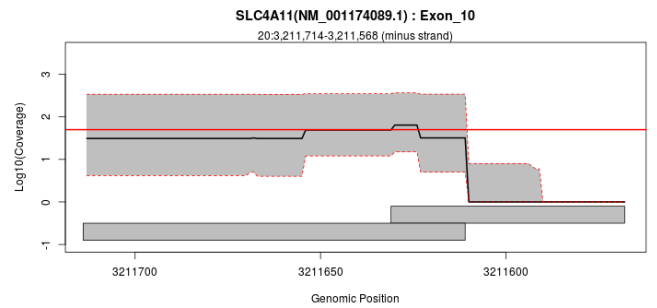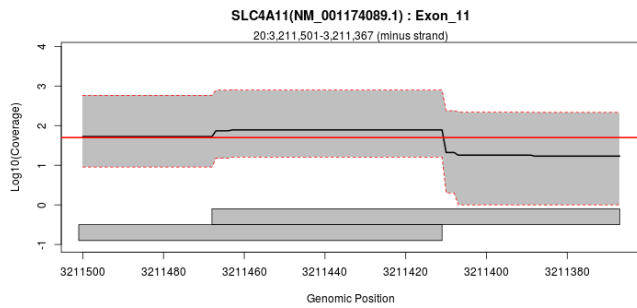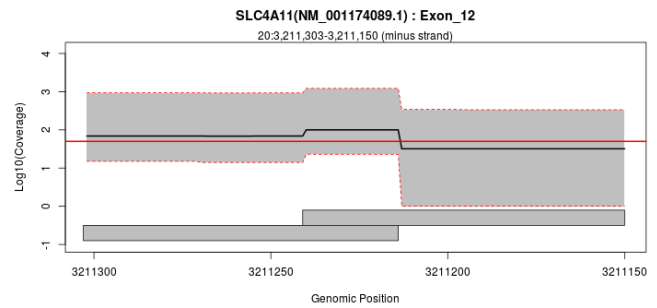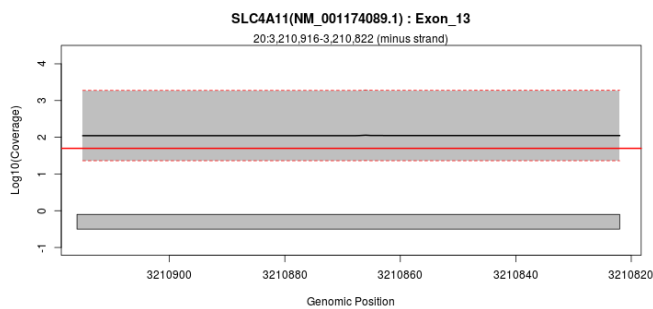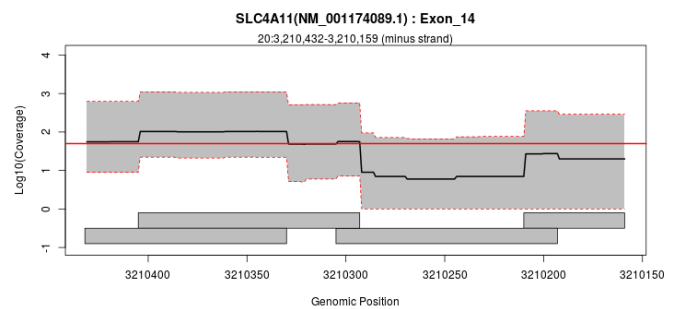

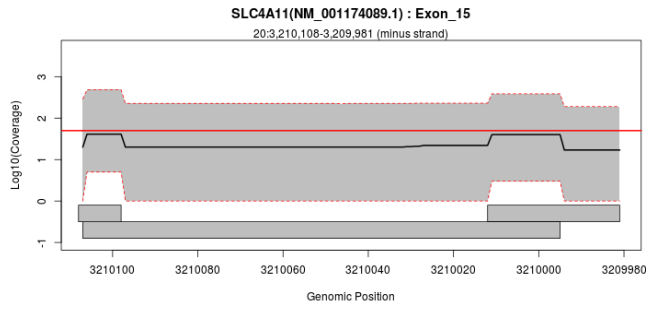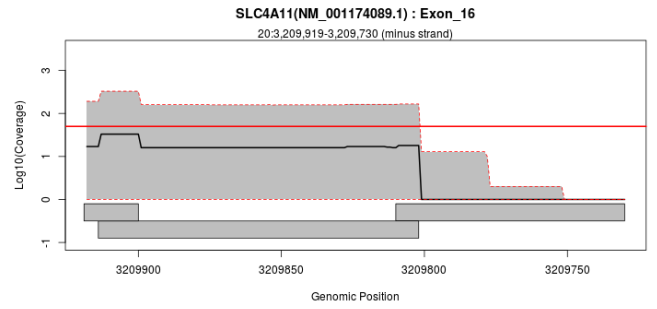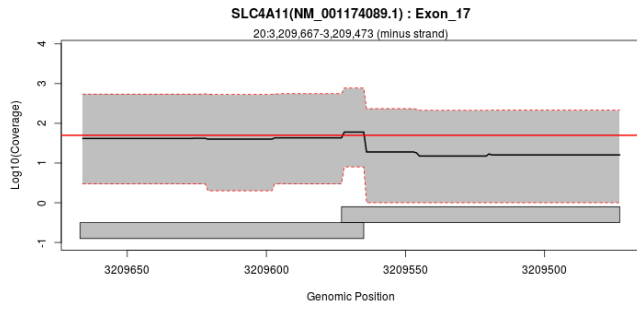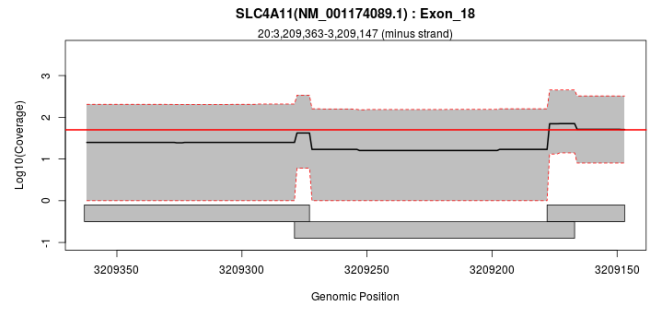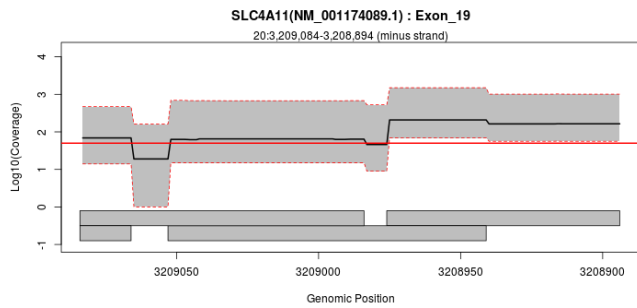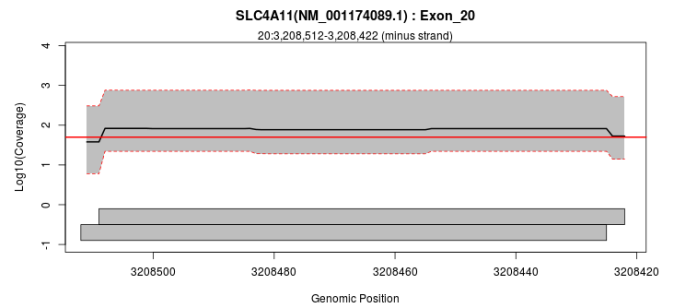

## Exon Overview: SLC4A11 : NM\_001174090.1

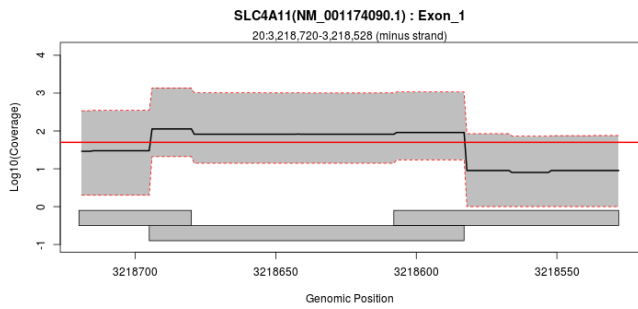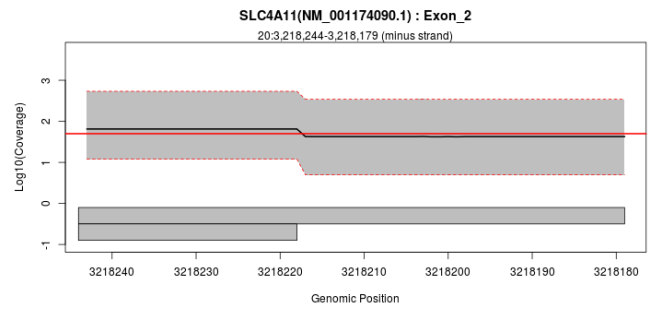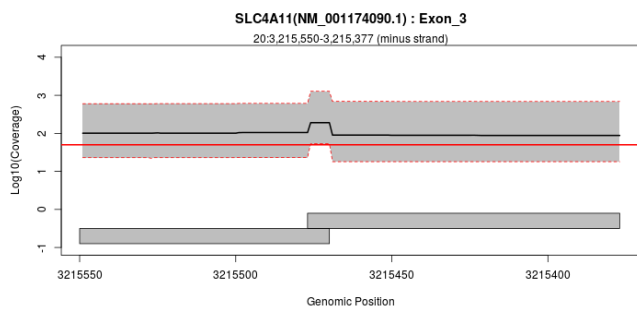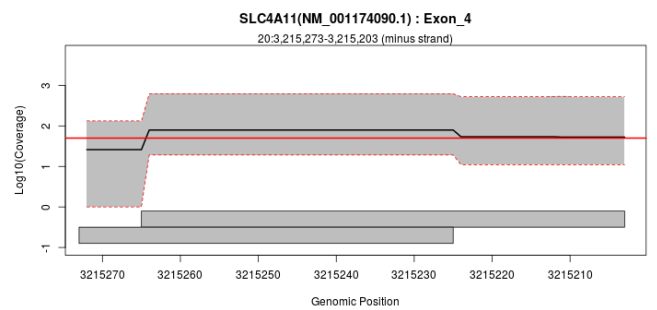

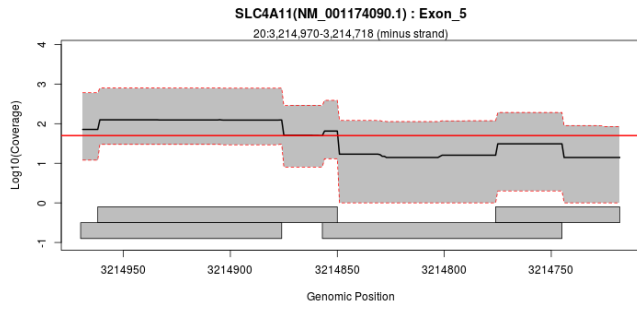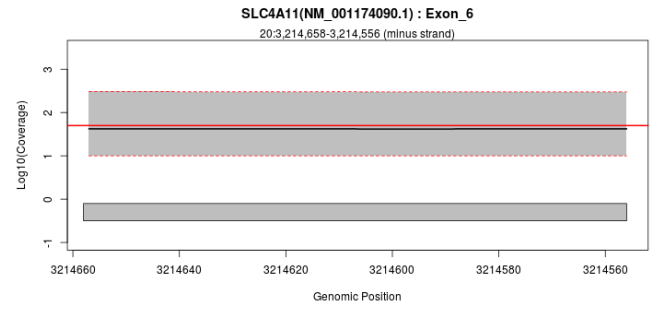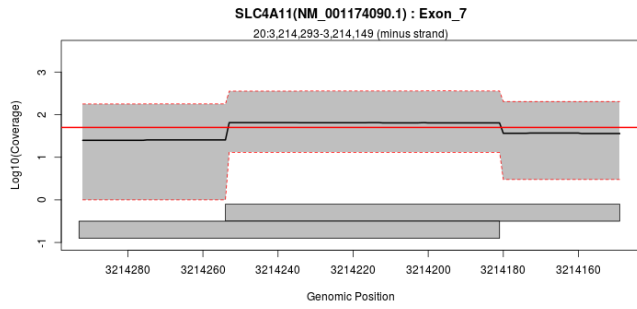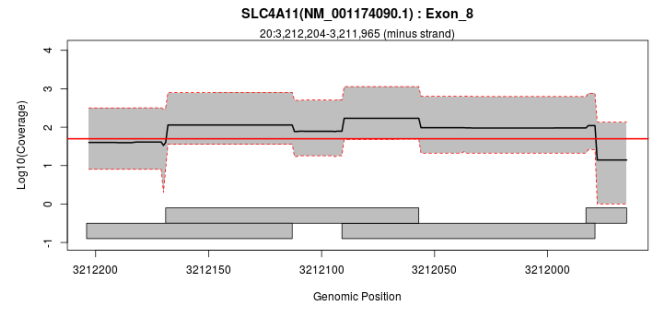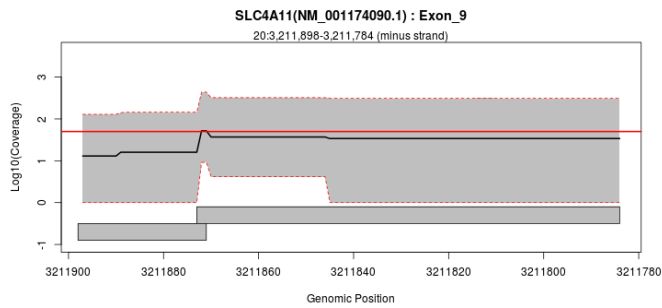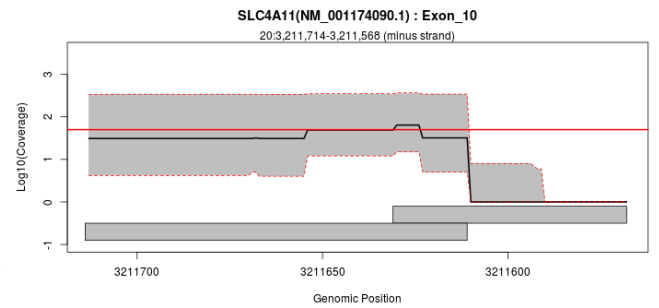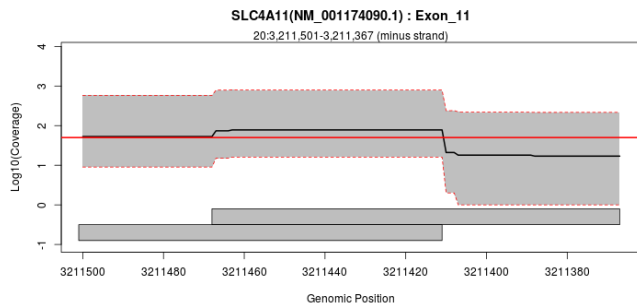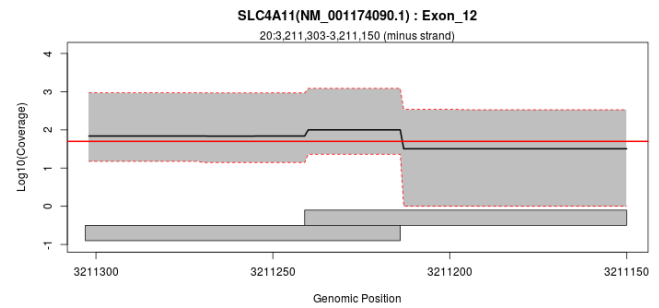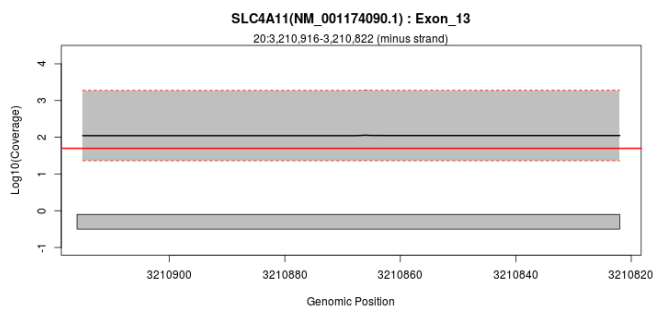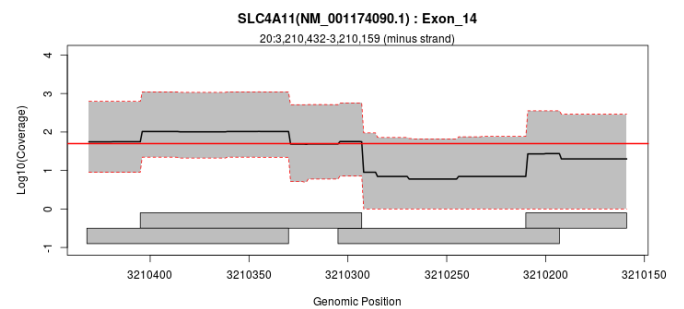



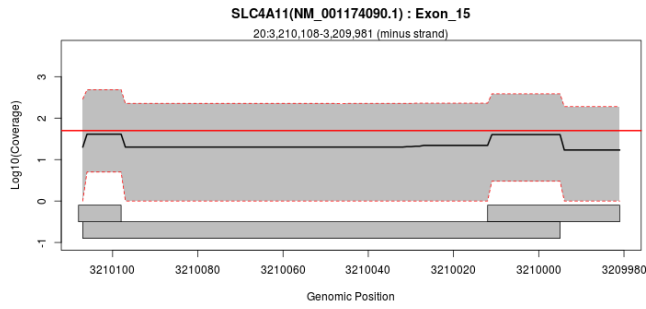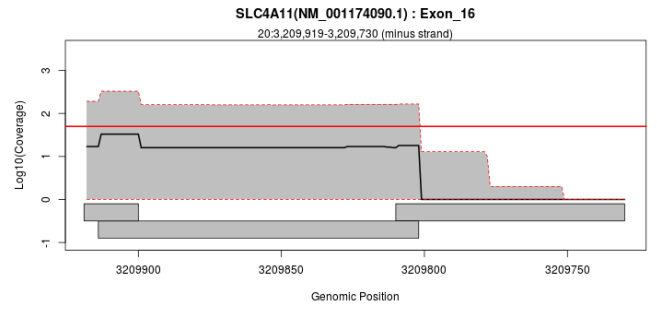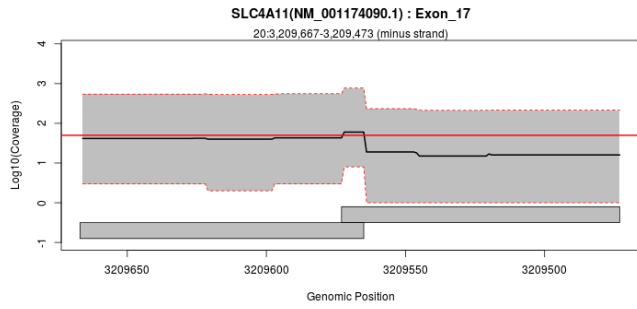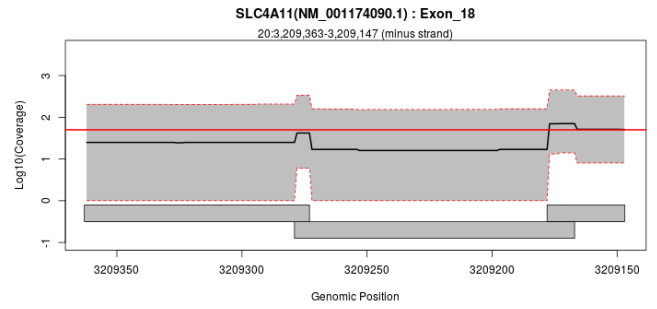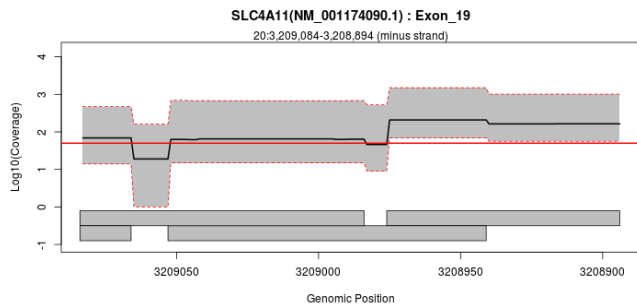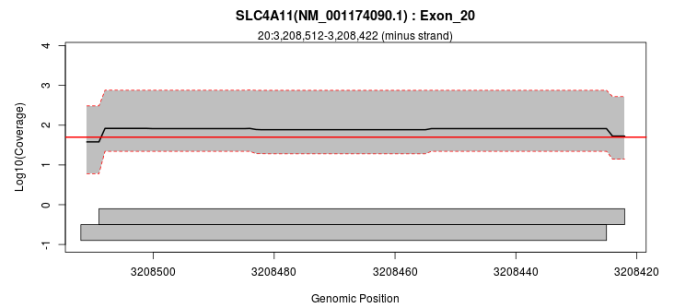

## Exon Overview: SLC4A11 : NM\_032034.3

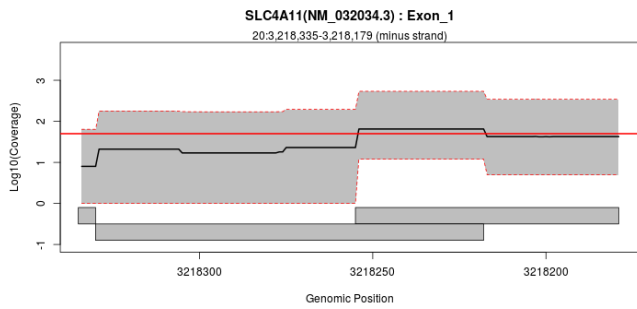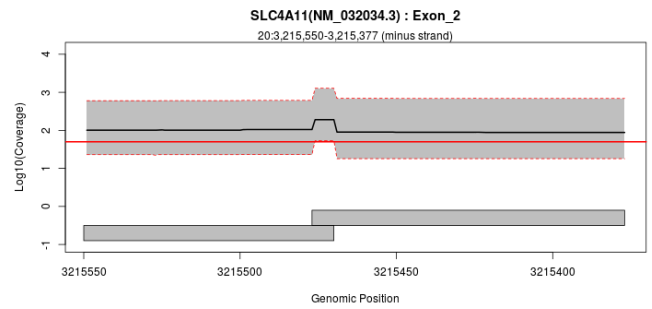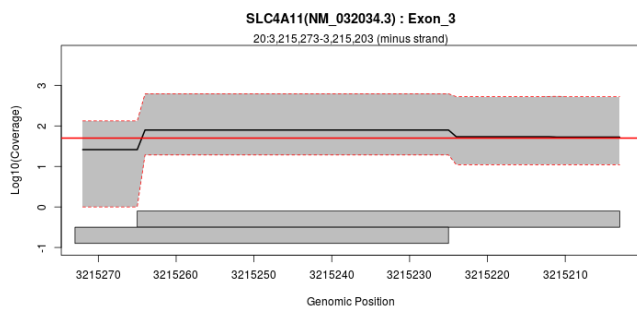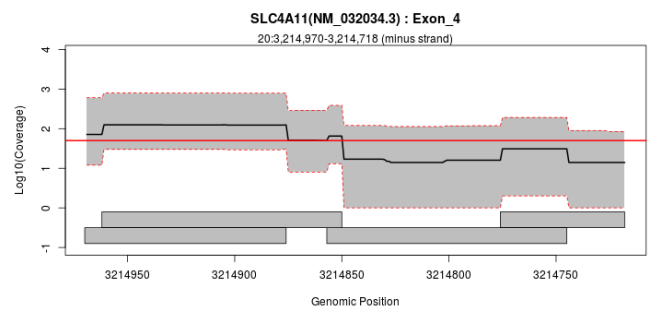

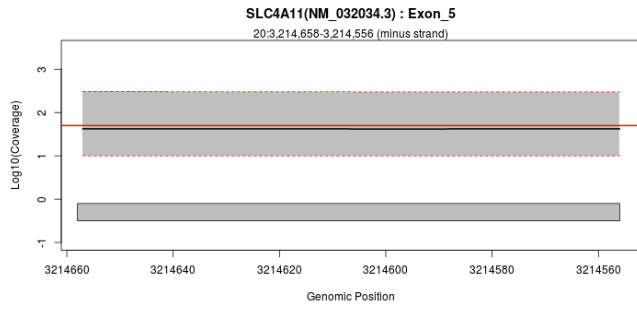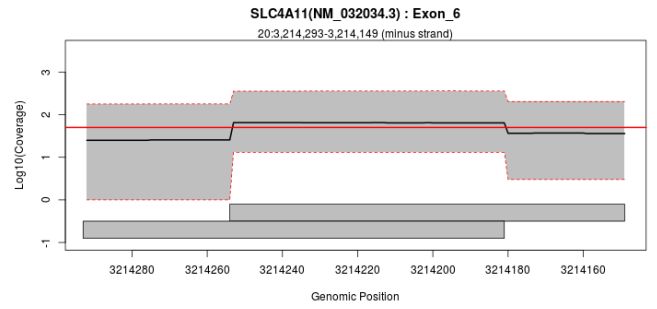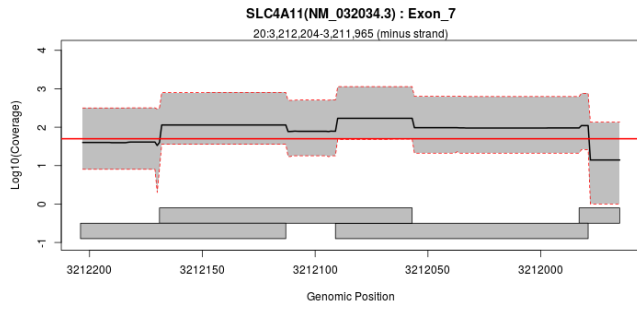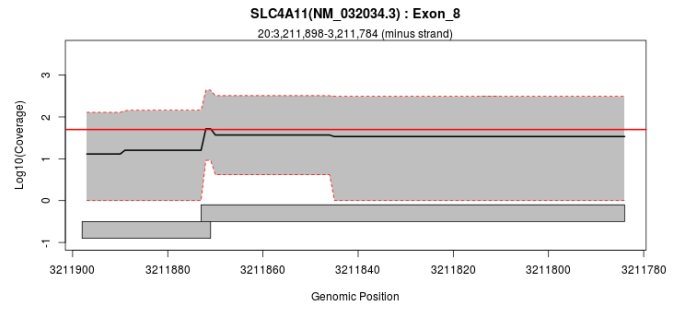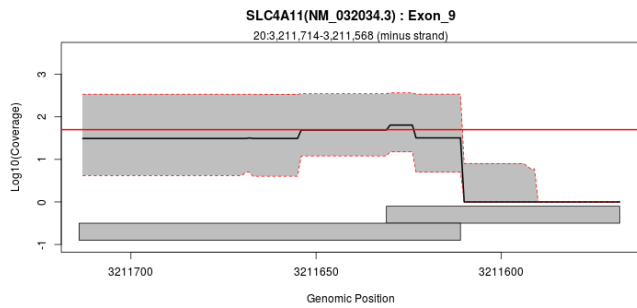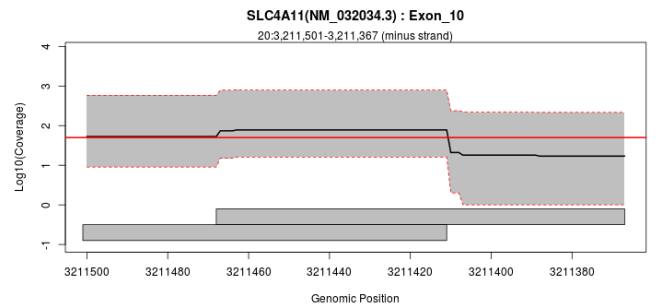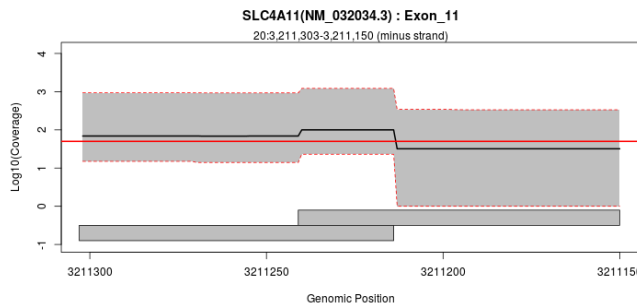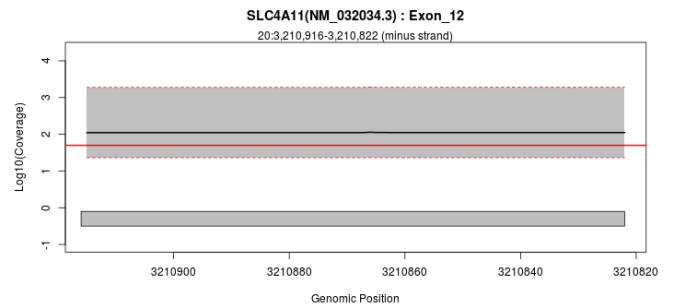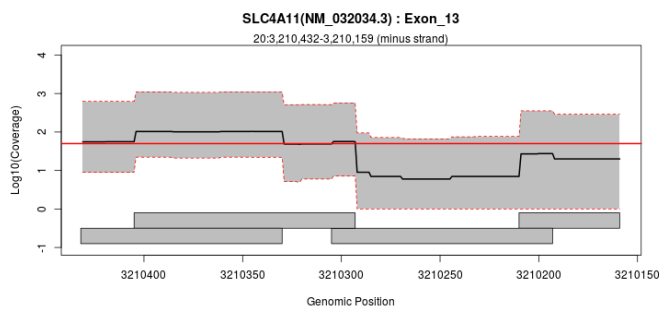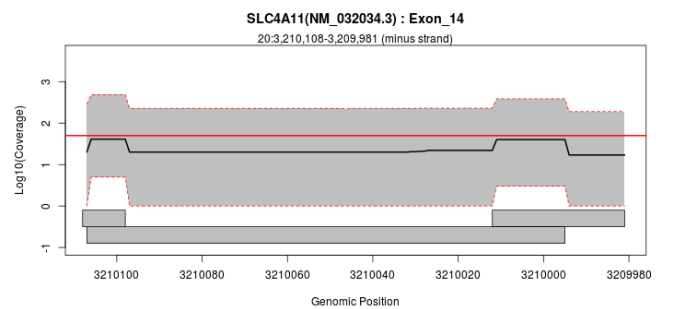

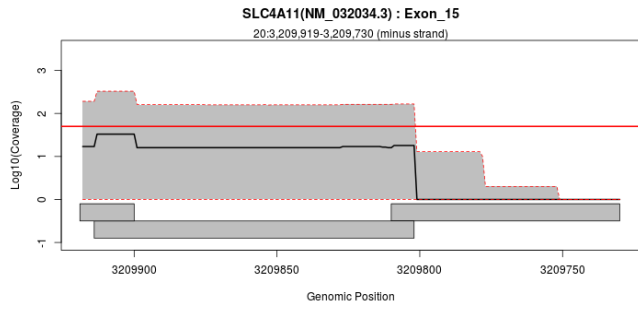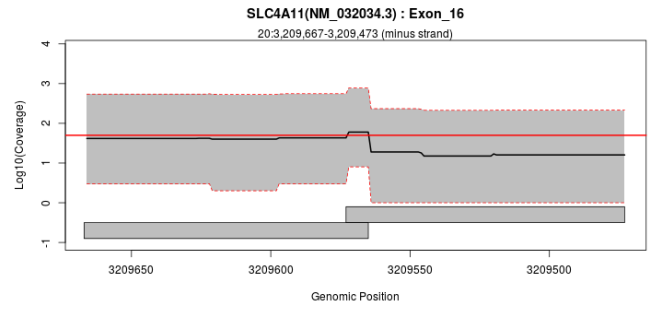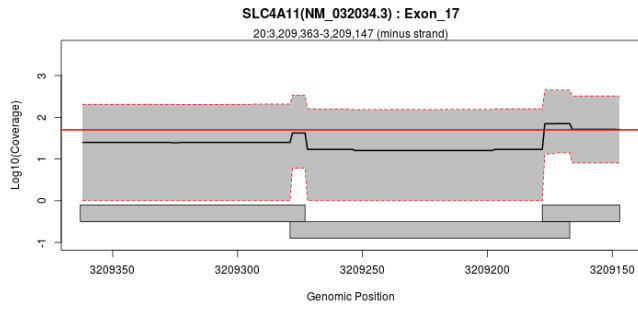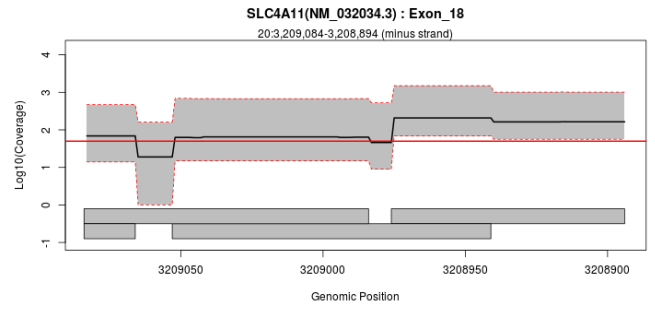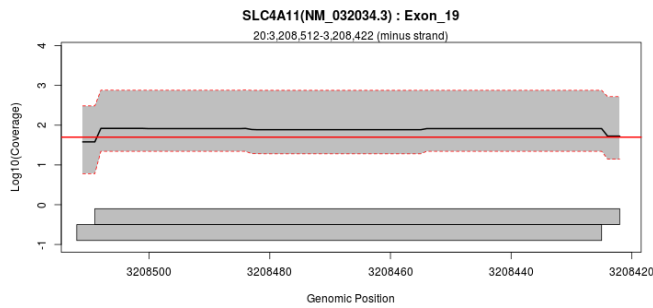

## Exon Overview: SOD1 : NM\_000454.4

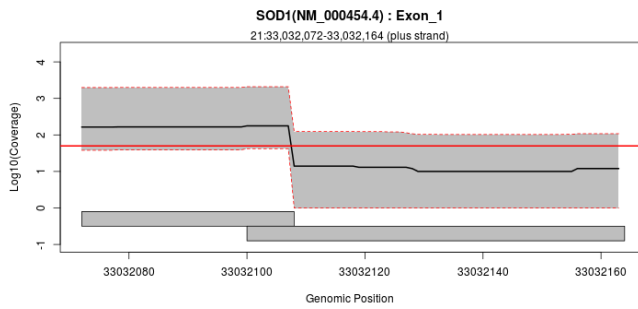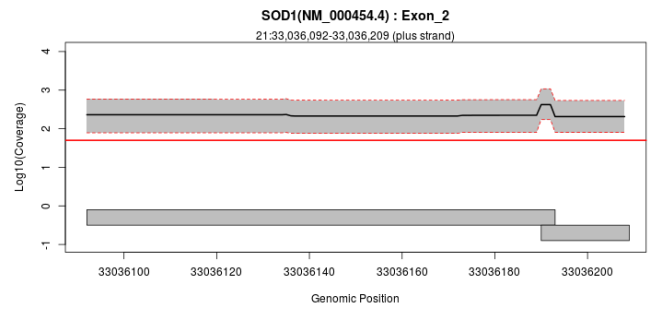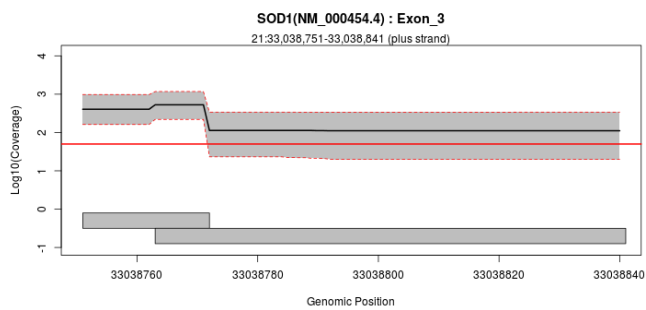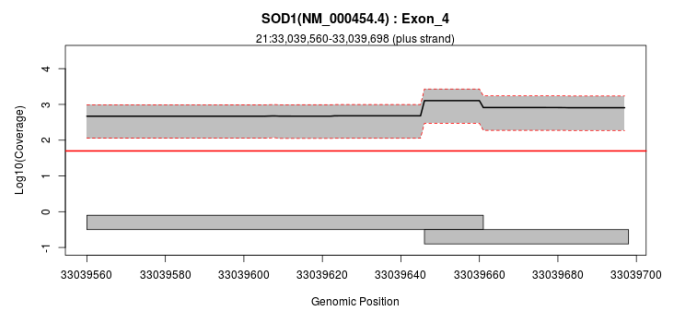

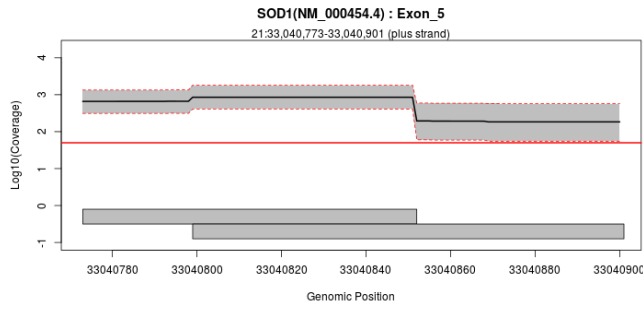

## Exon Overview: TF : NM\_001063.3

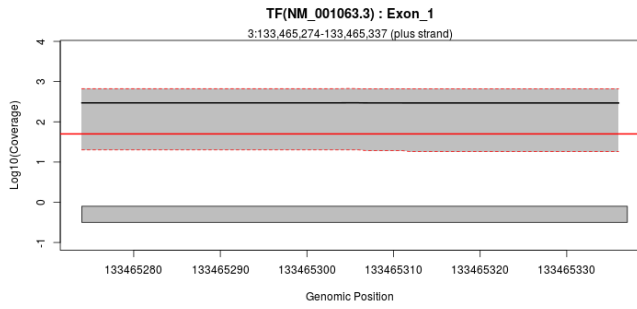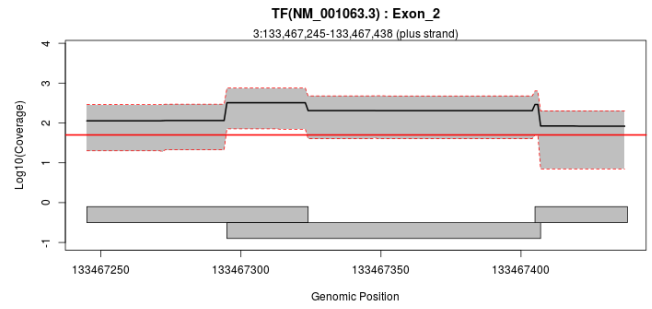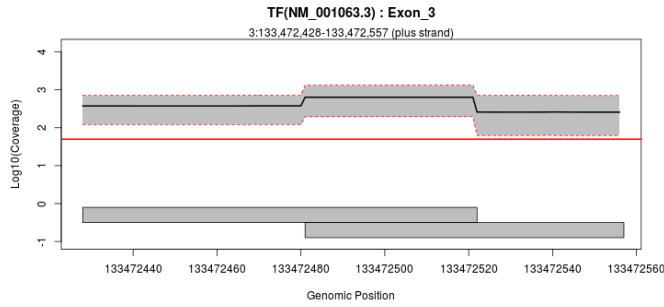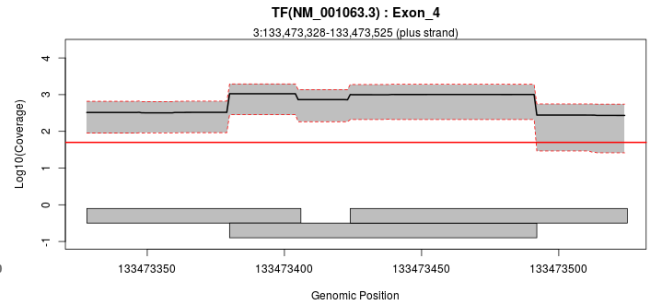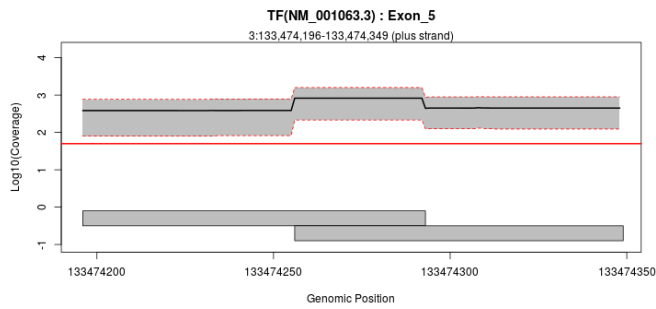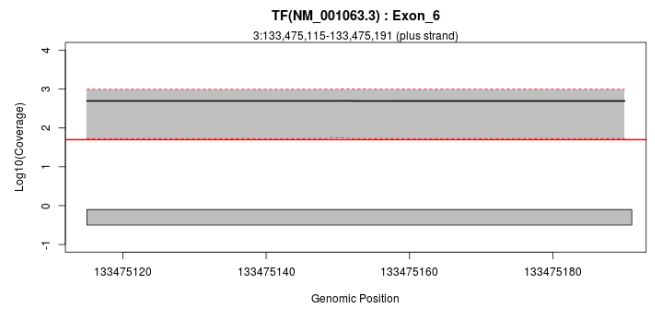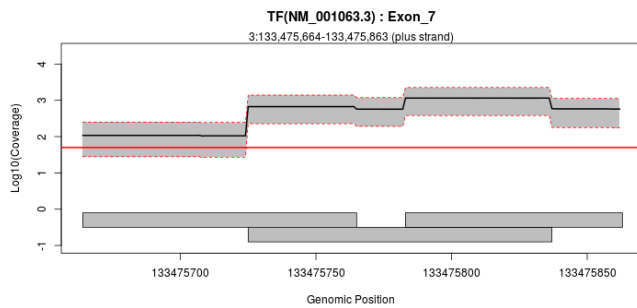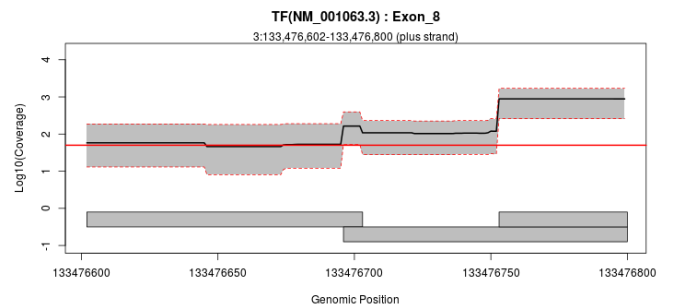

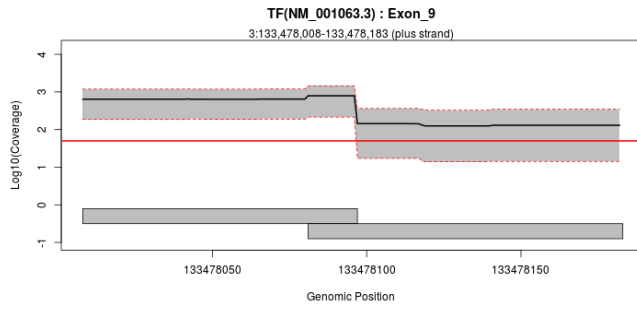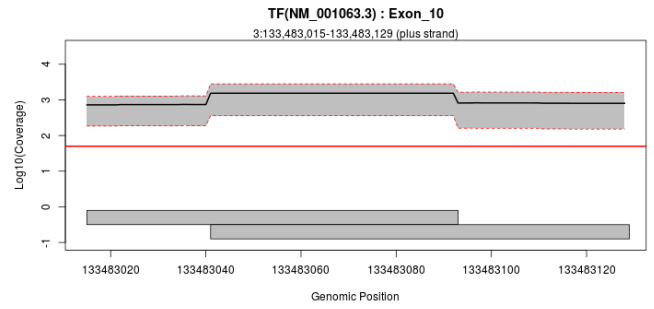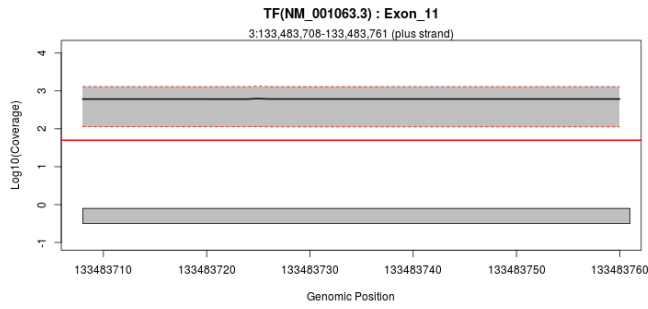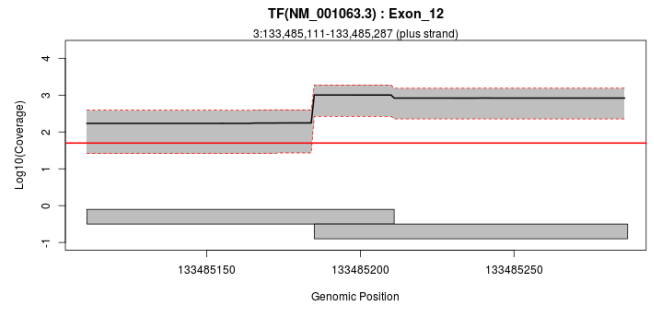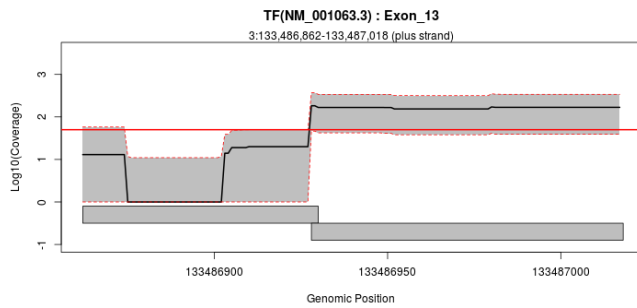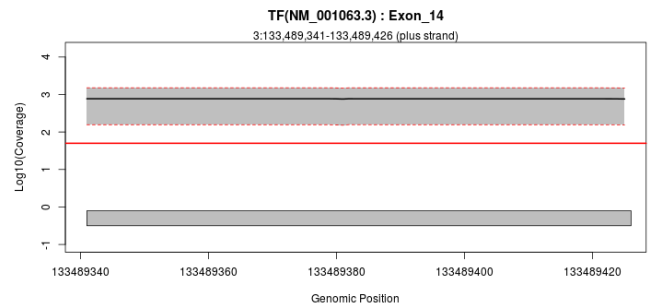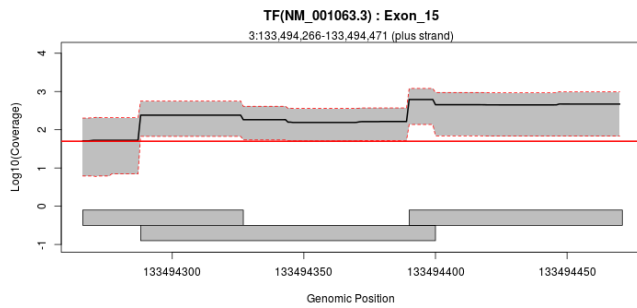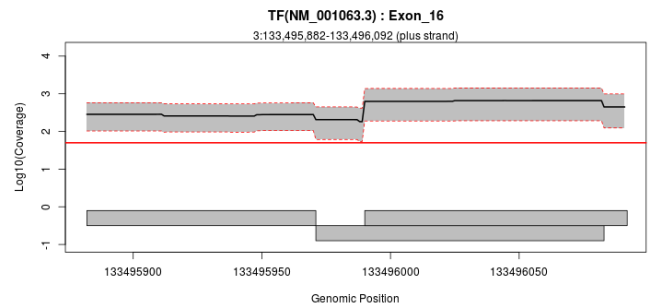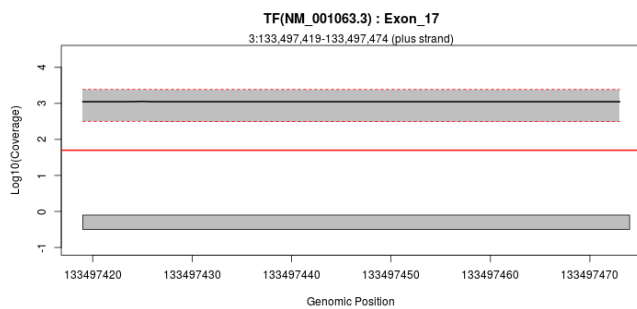

# Exon Overview: TGFBI : NM\_000358.2

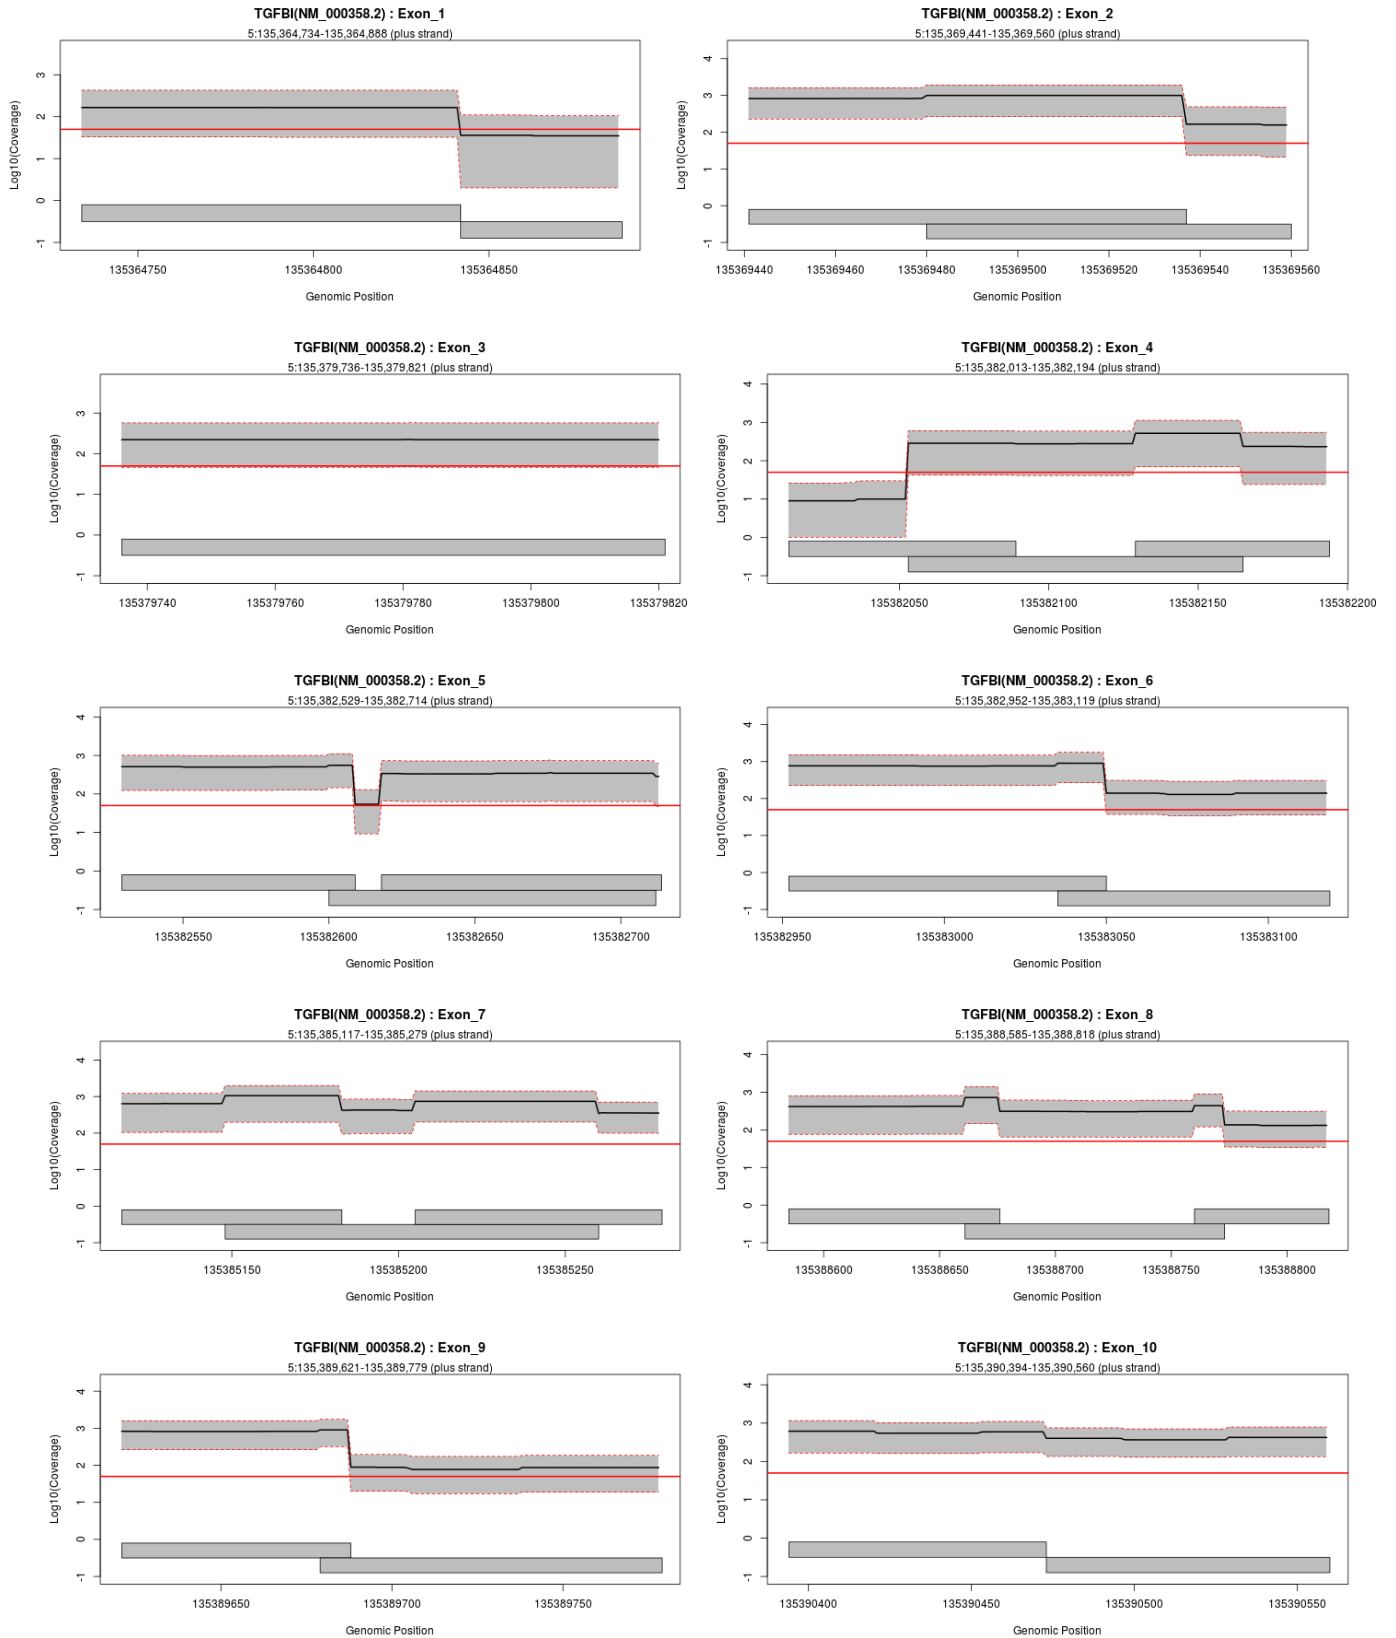

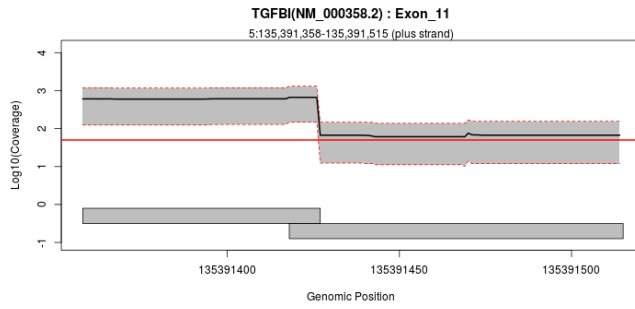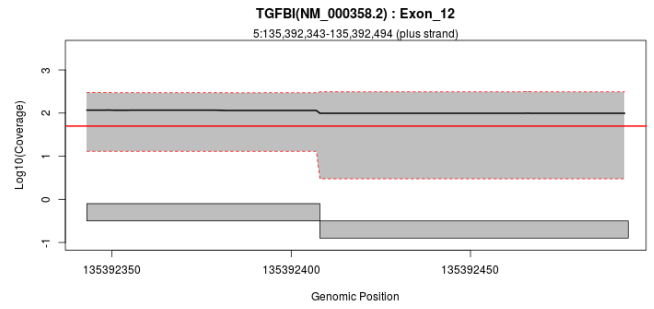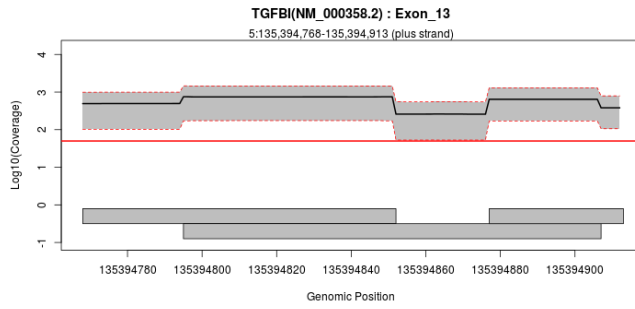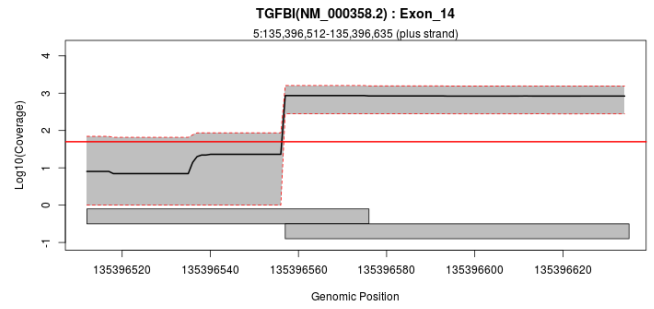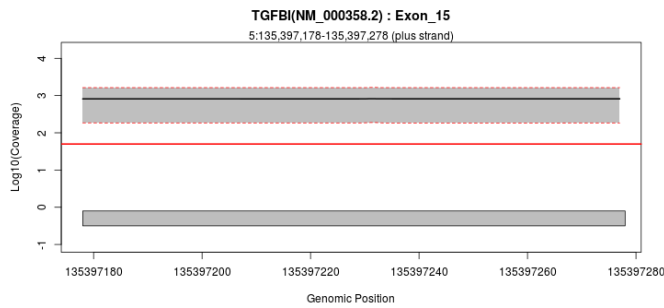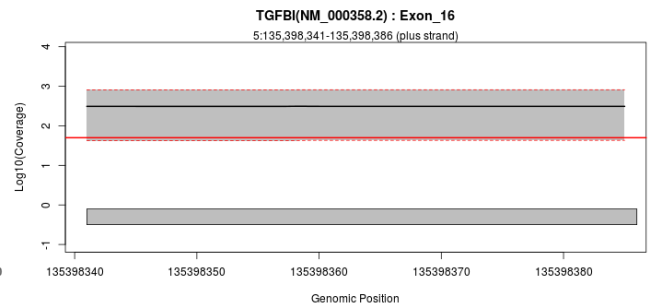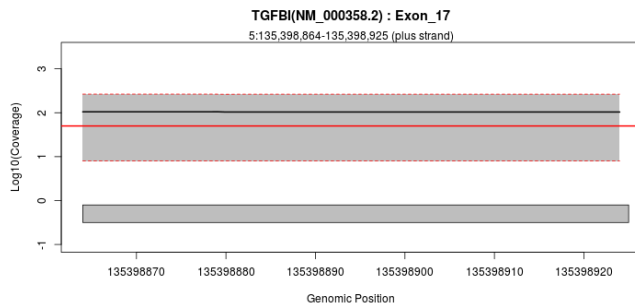

## Exon Overview: TNXB : NM\_019105.6

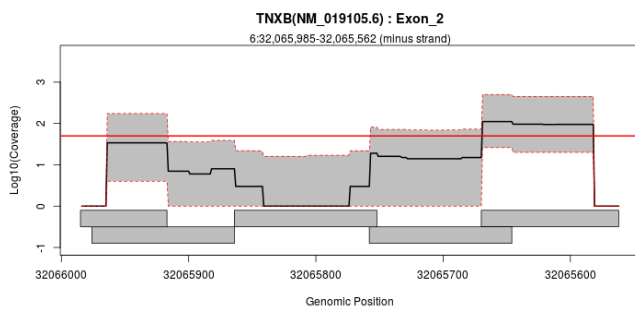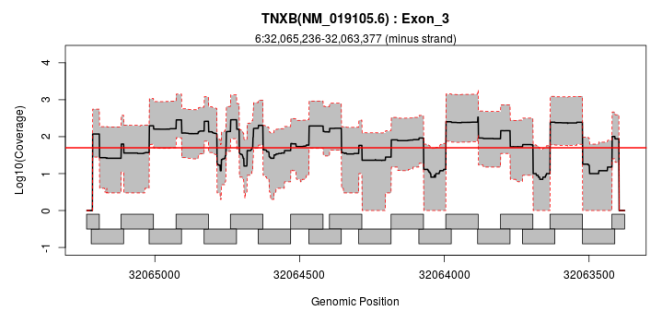

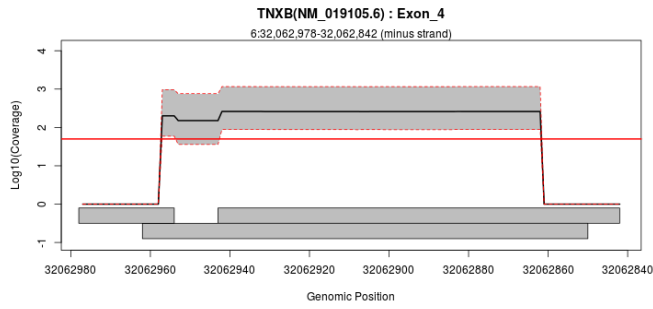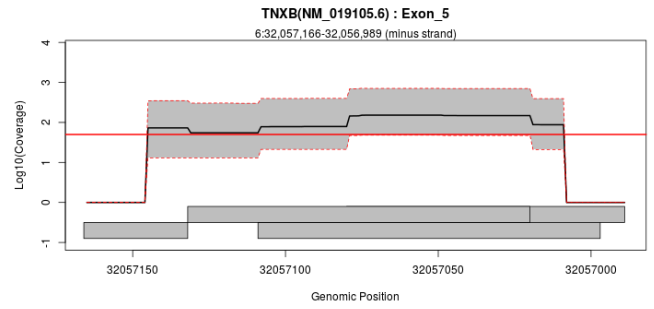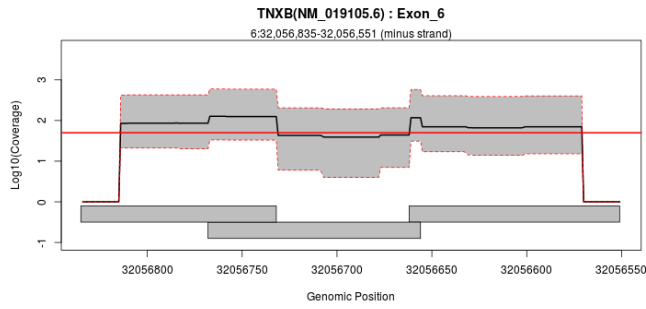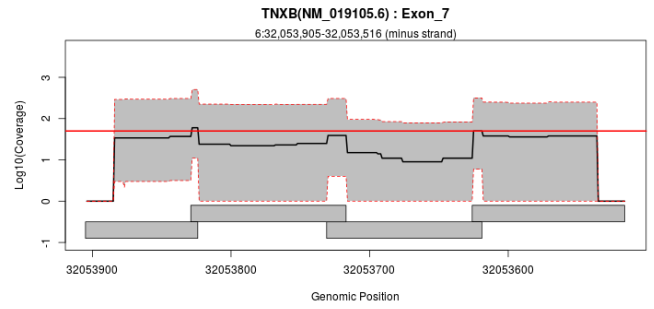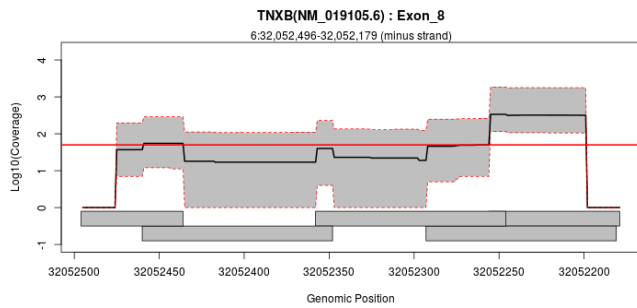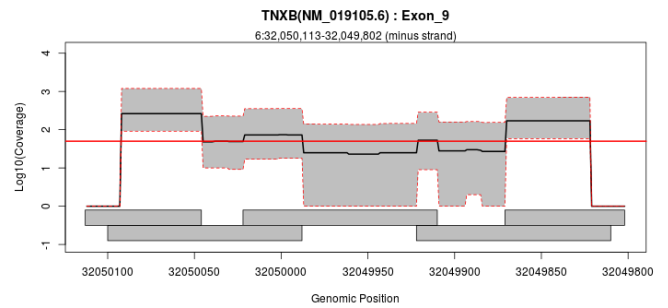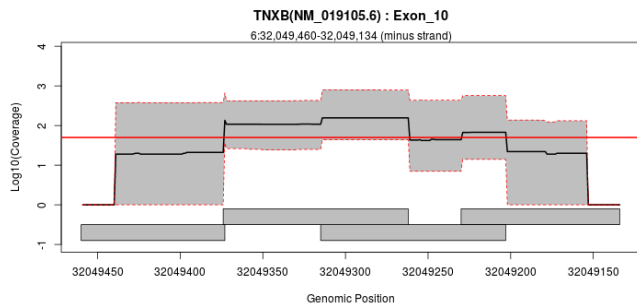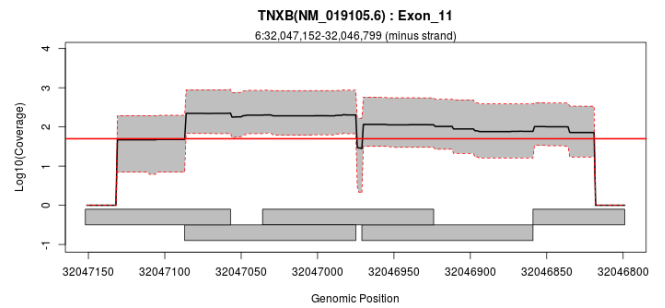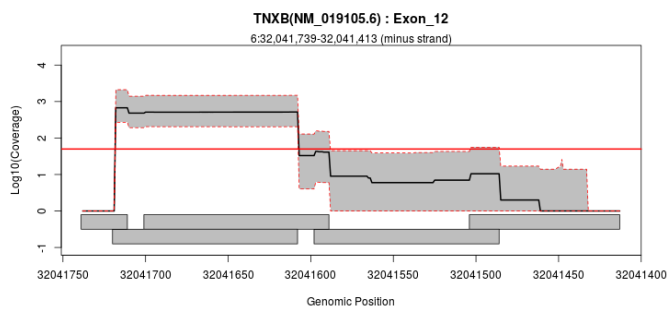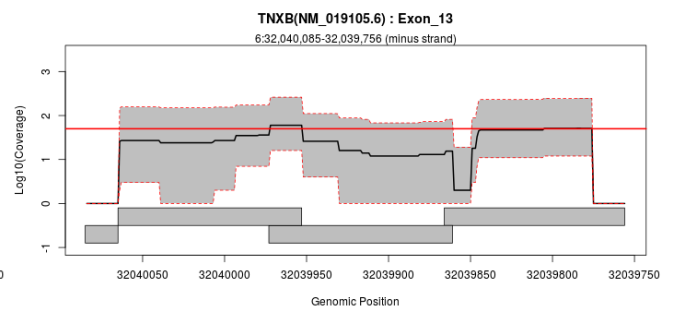



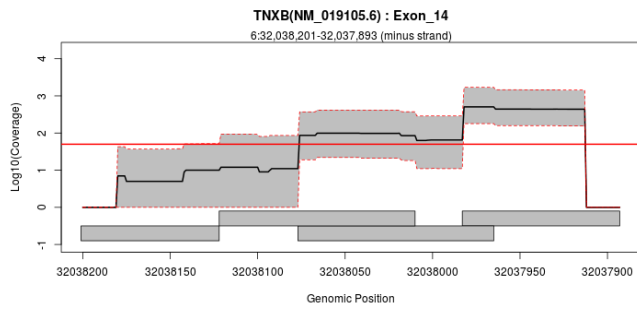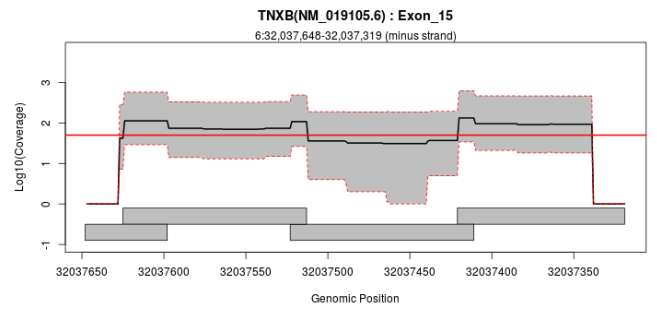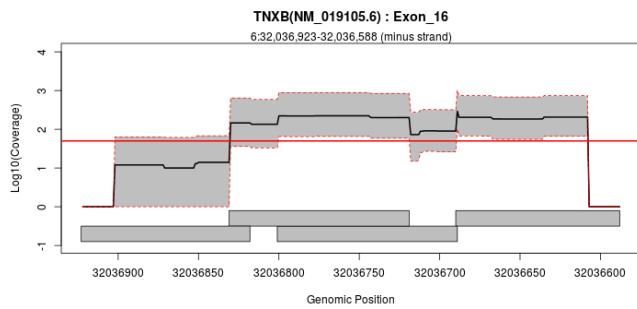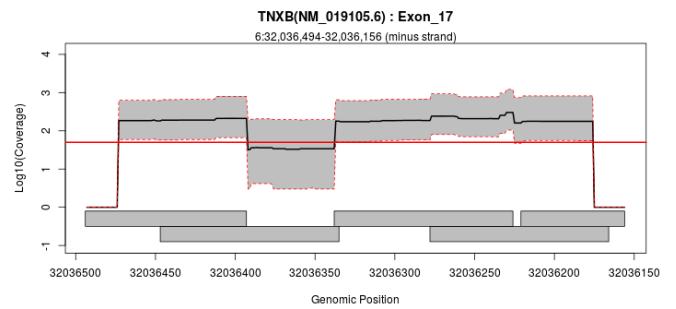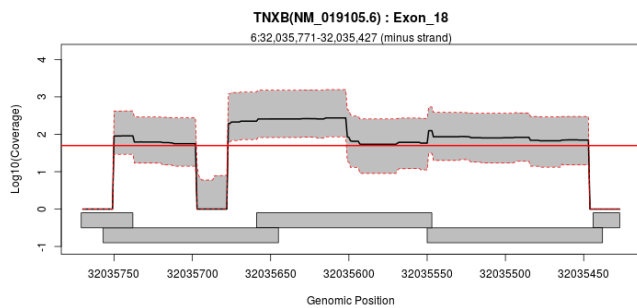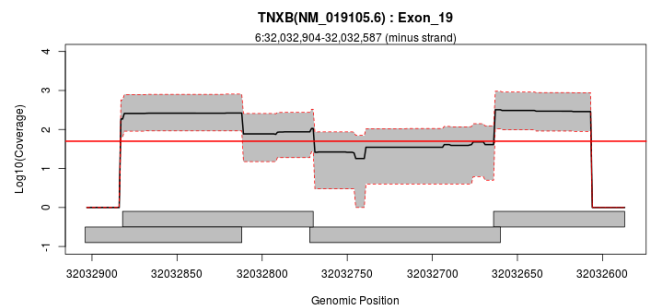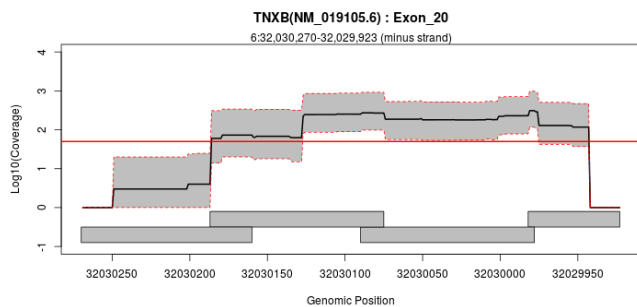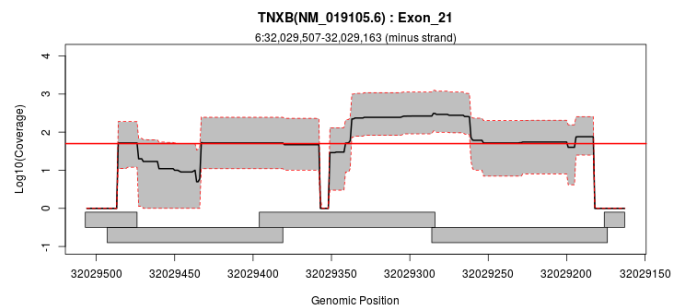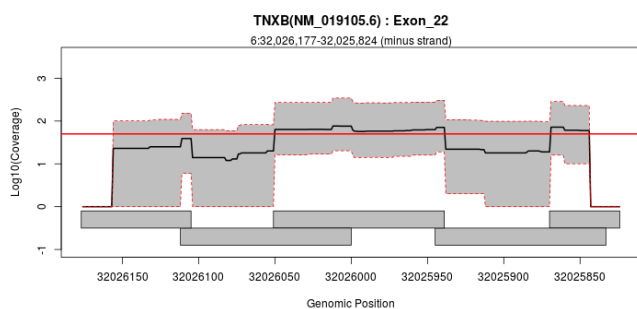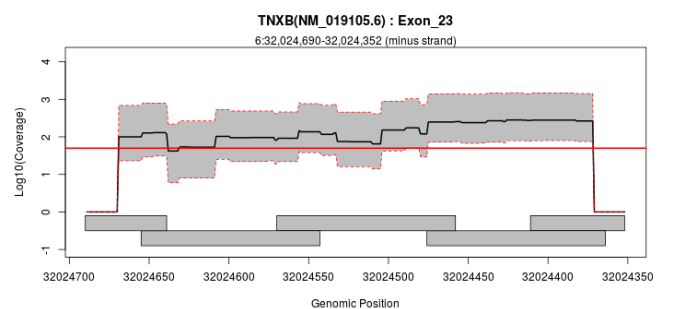

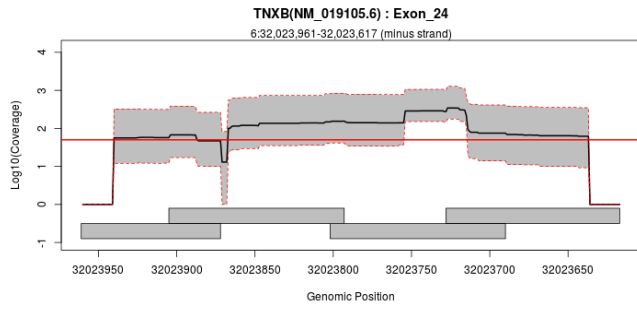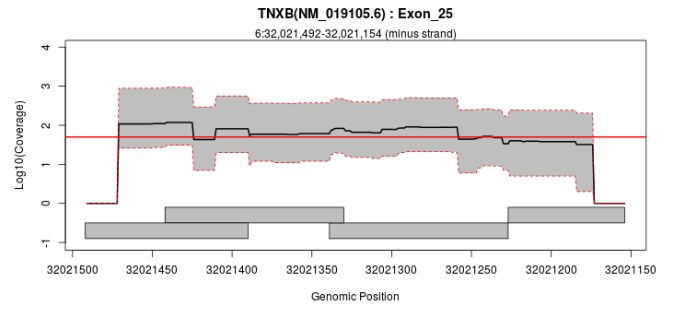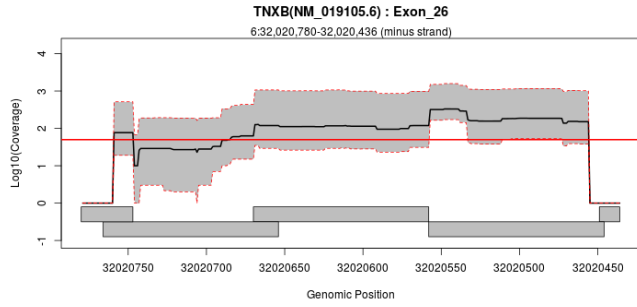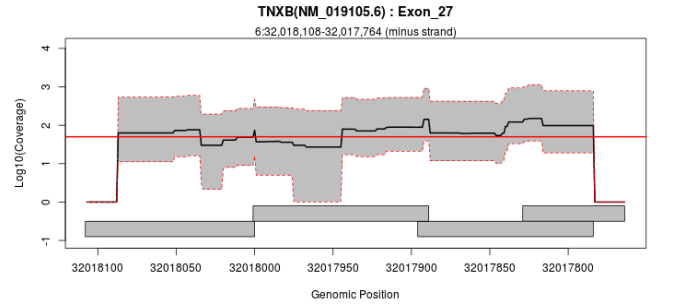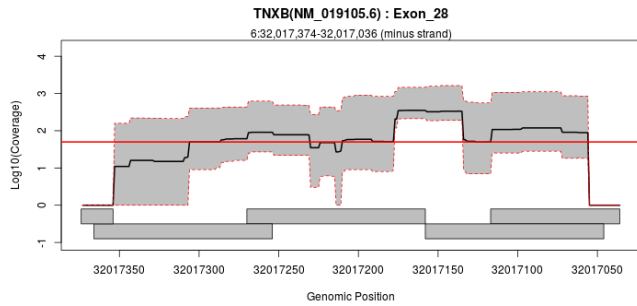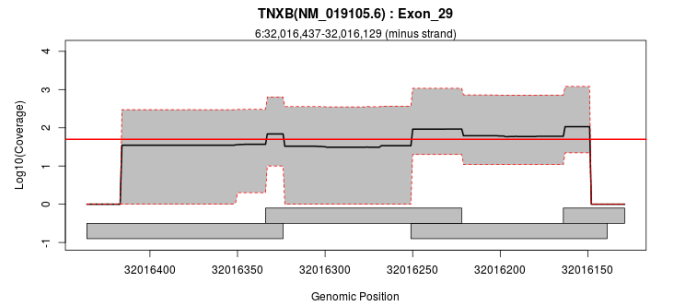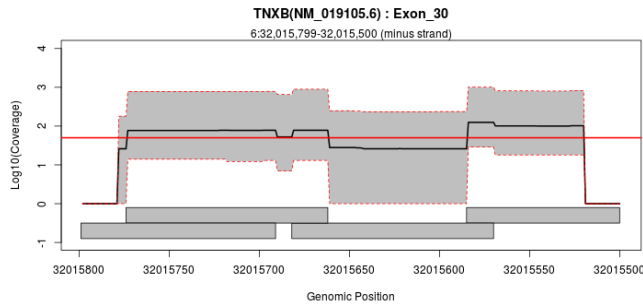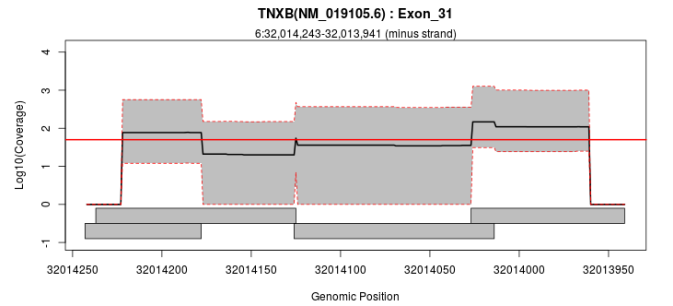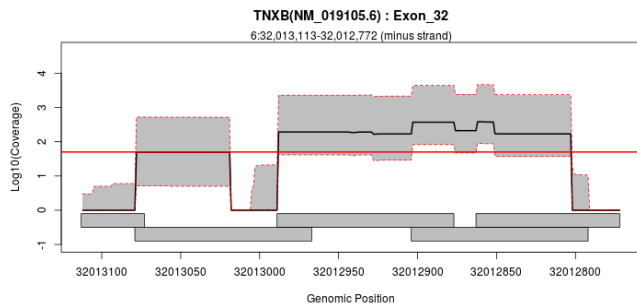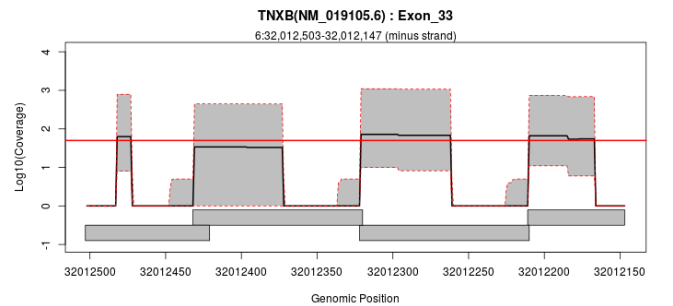

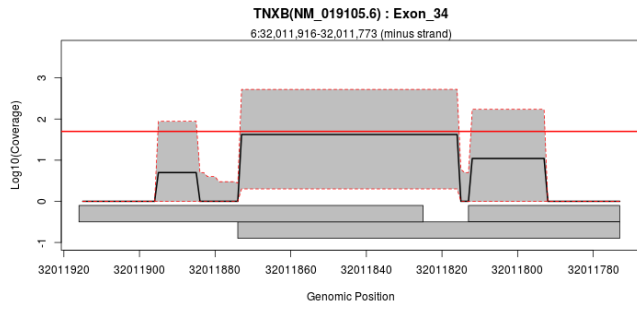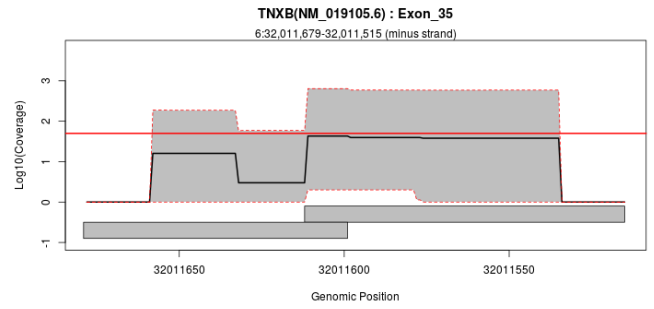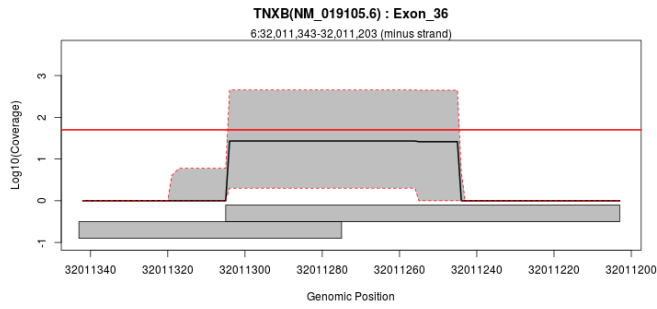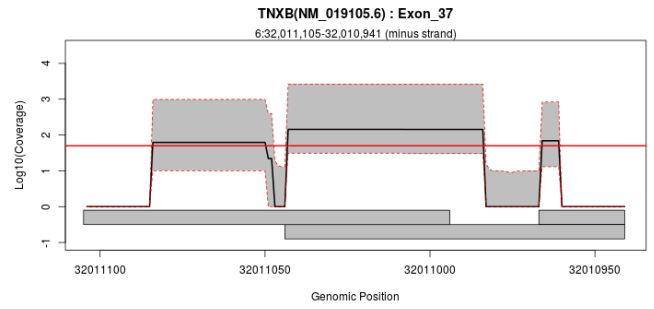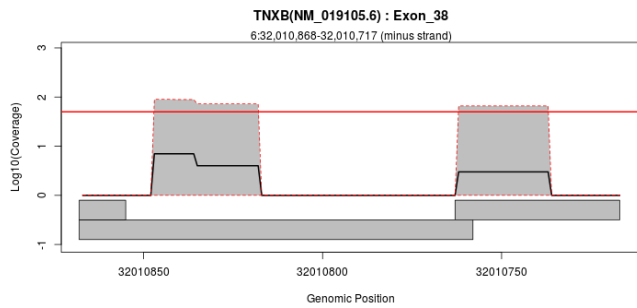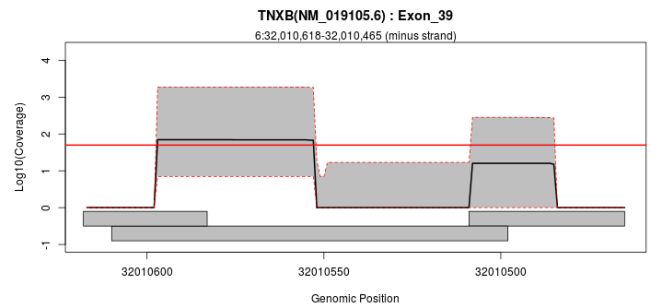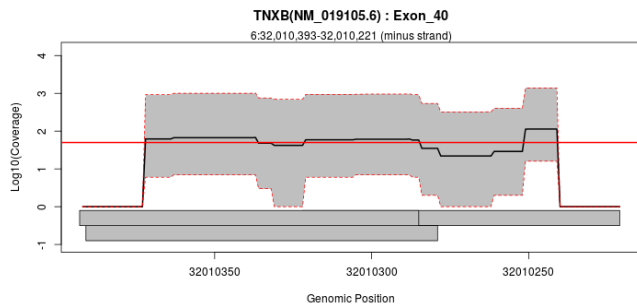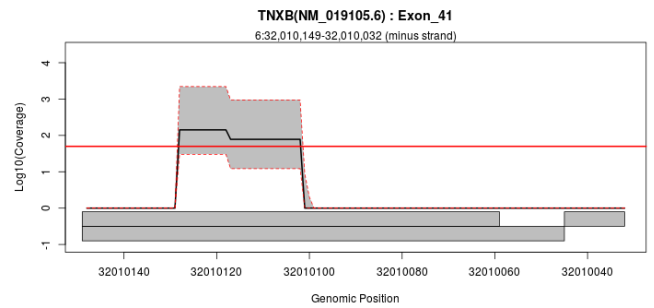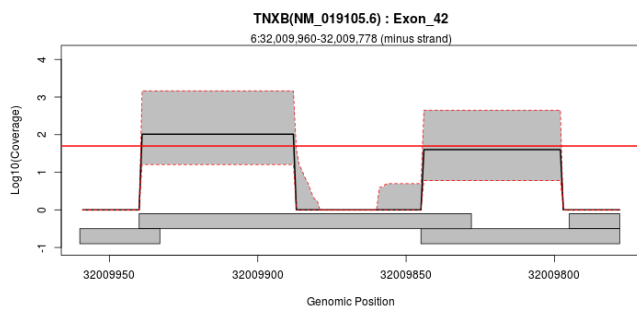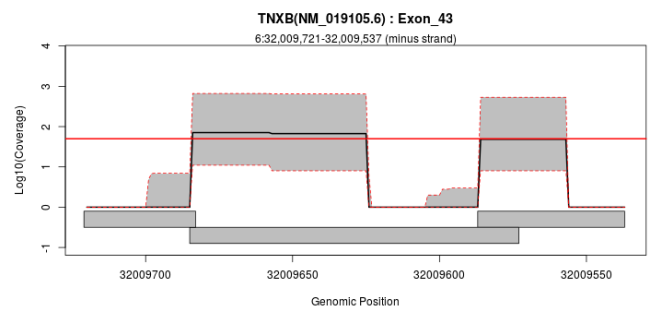

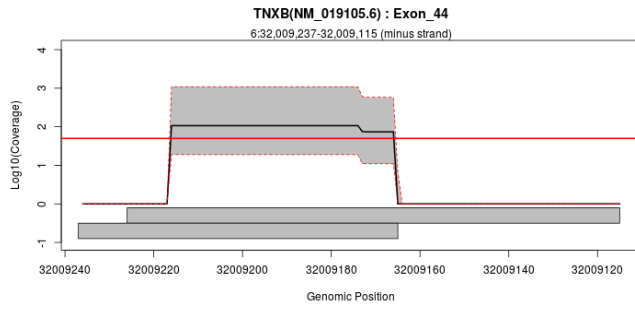

## Exon Overview: TNXB : NM\_032470.3

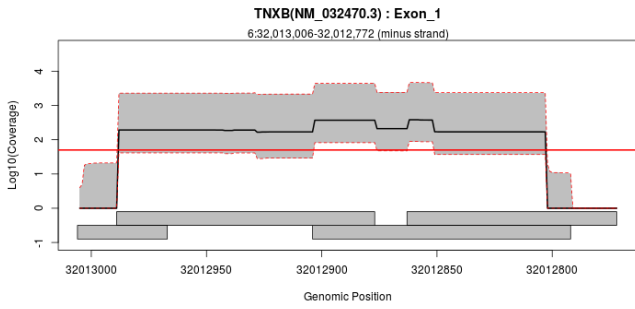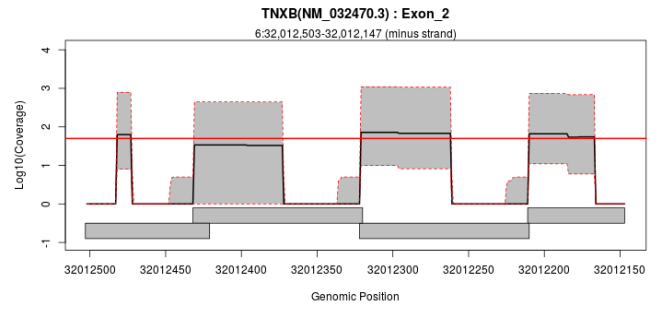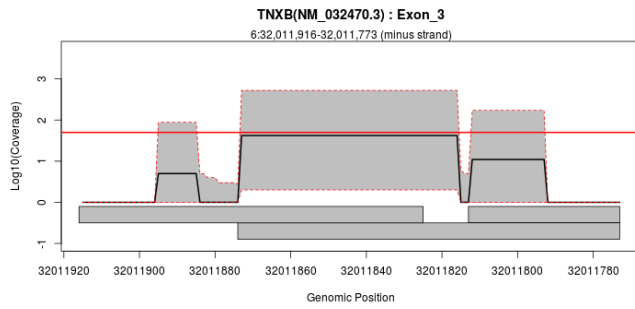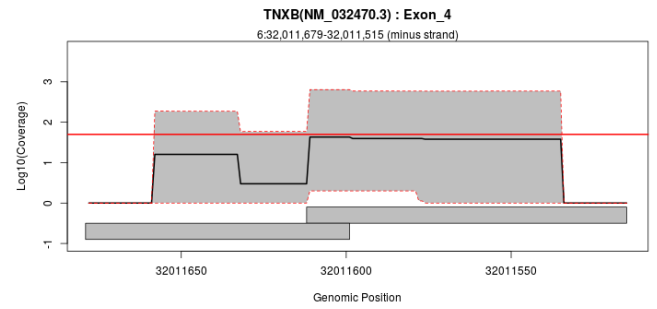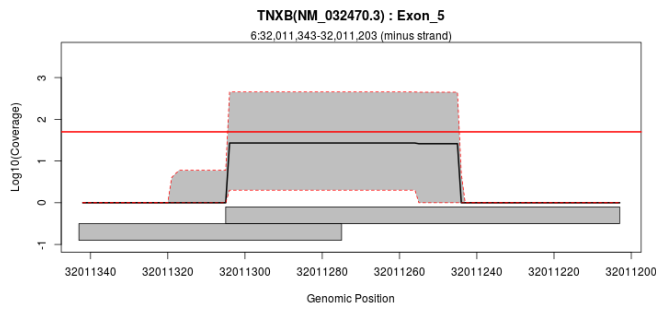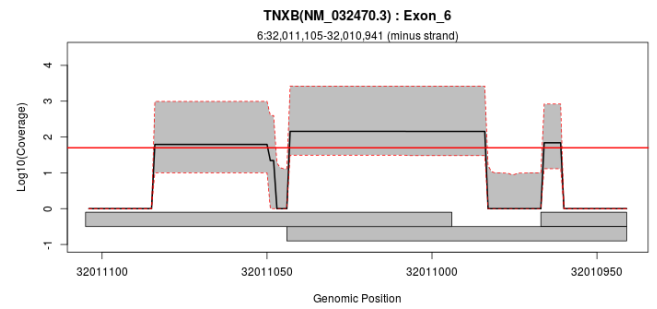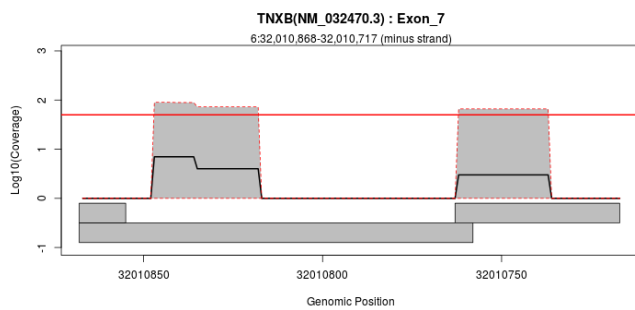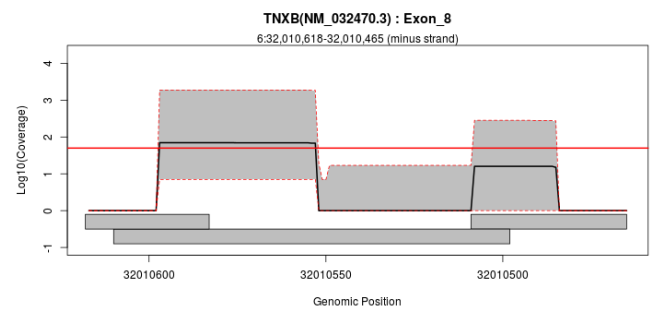

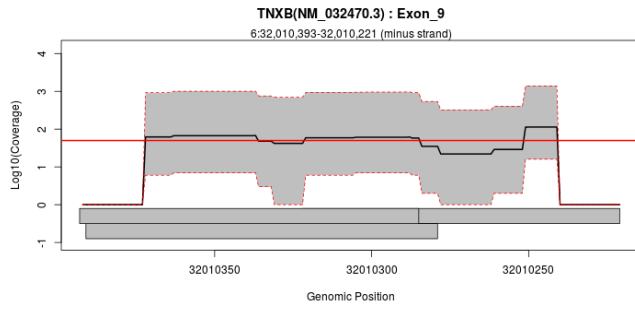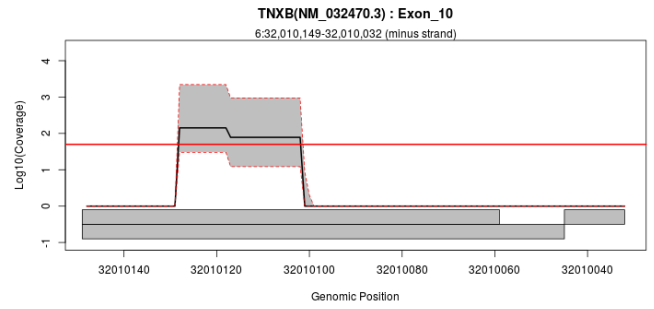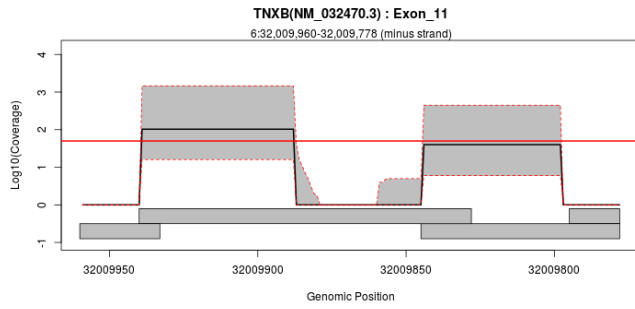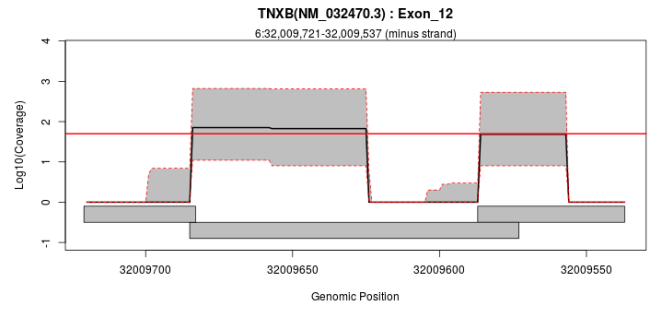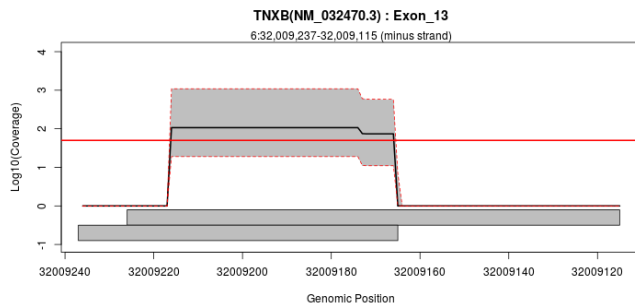

## Exon Overview: VSX1 : NM\_001256271.1

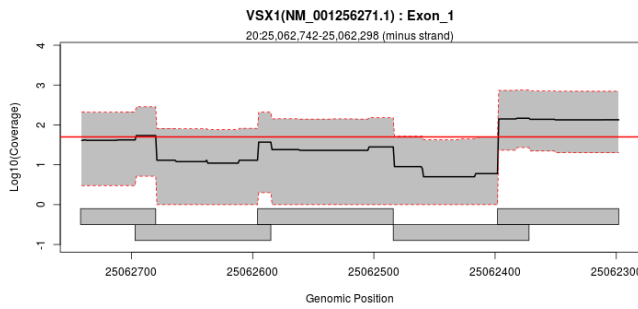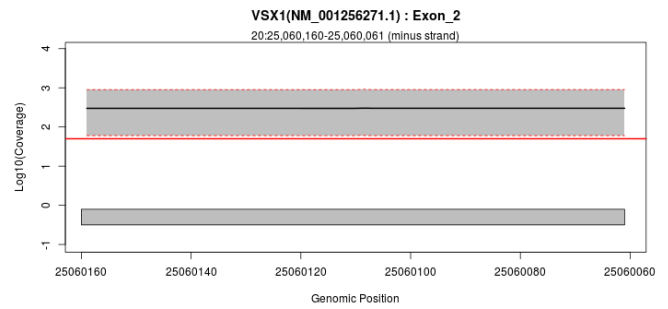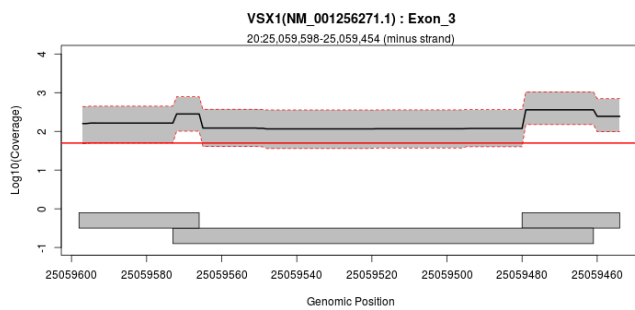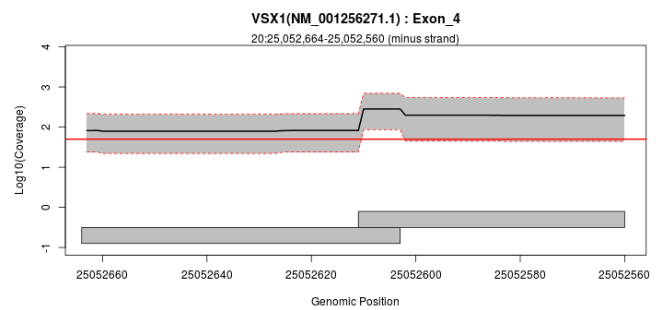

## Exon Overview: VSX1 : NM\_001256272.1

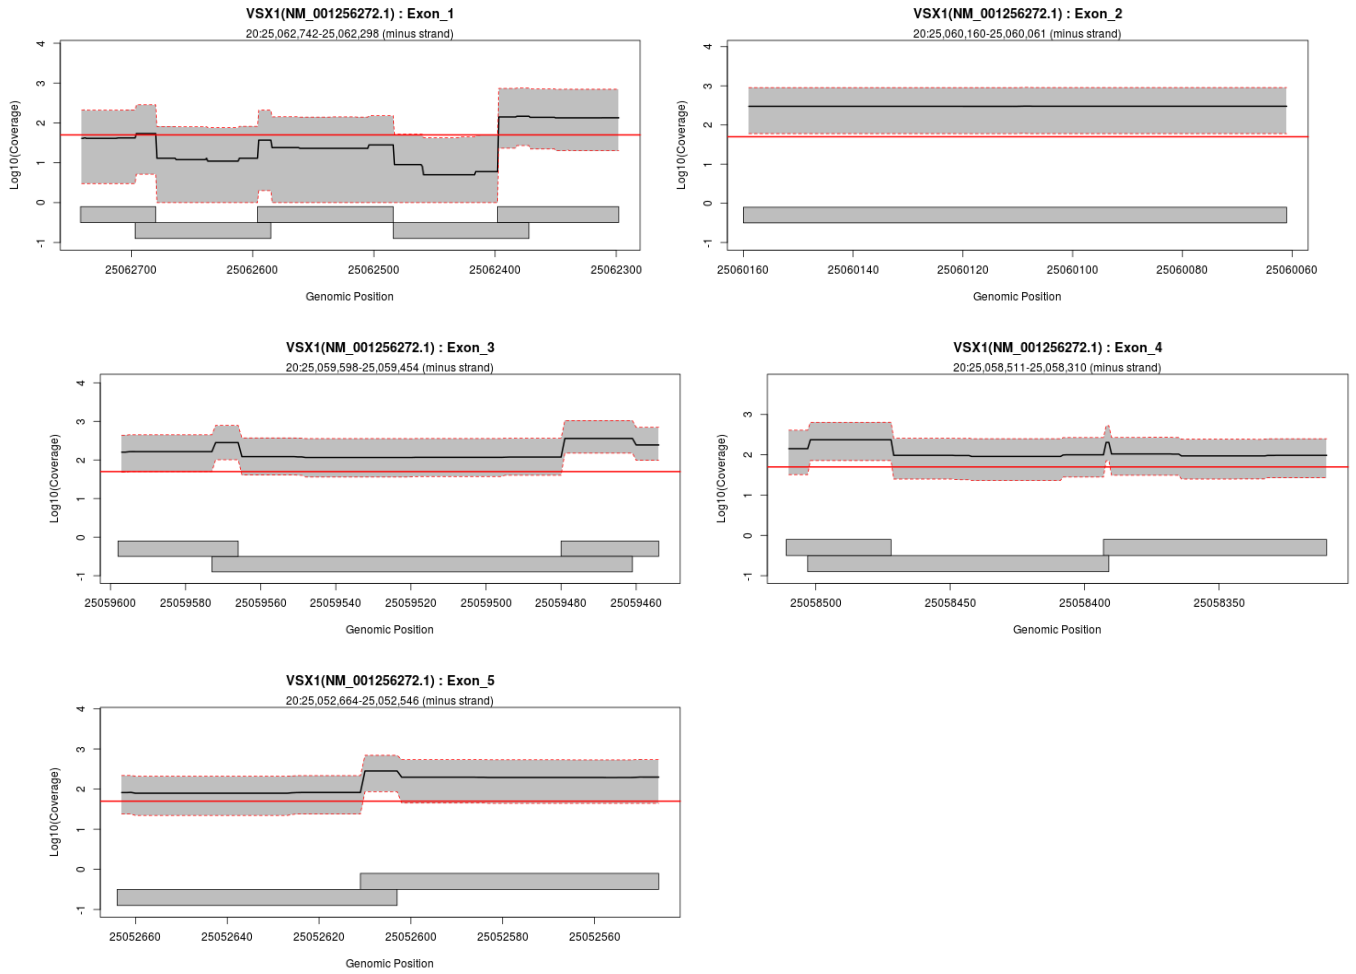

## Exon Overview: VSX1 : NM\_014588.5

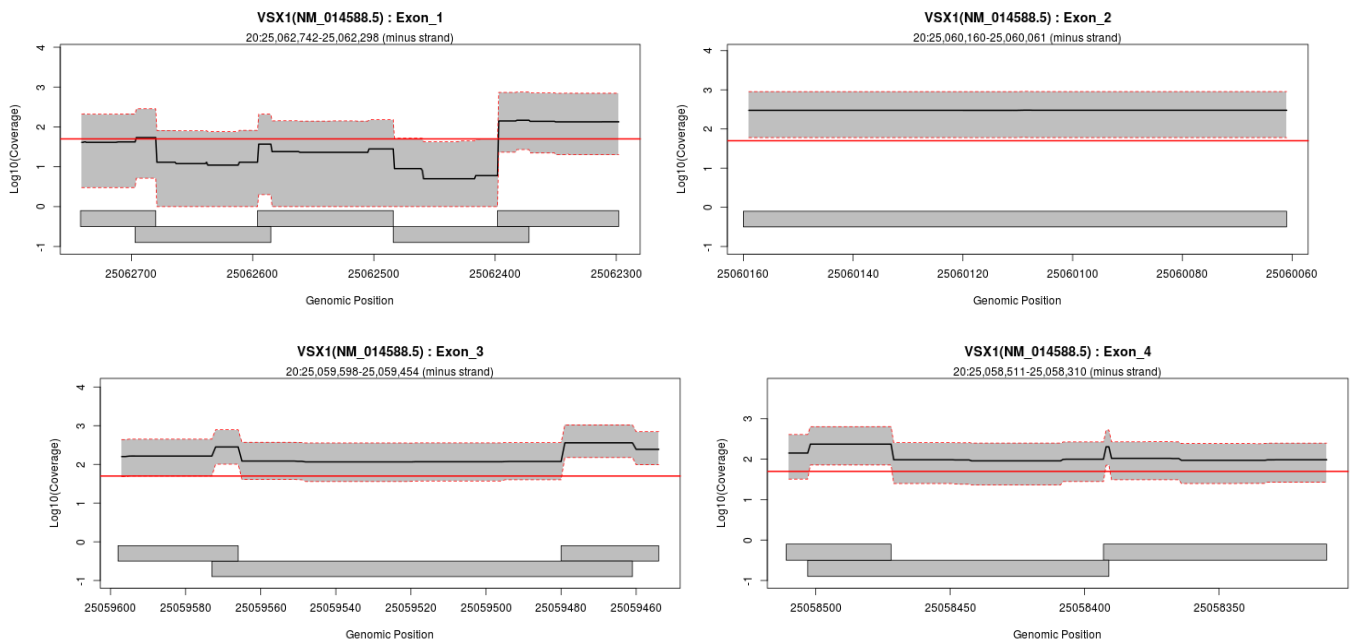

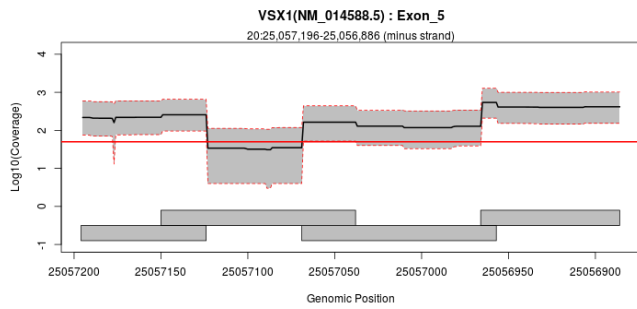

## Exon Overview: VSX1 : NM\_199425.2

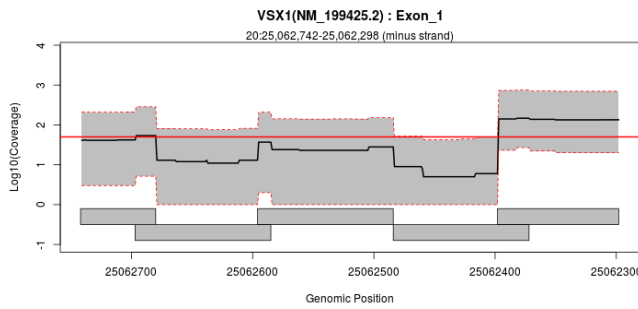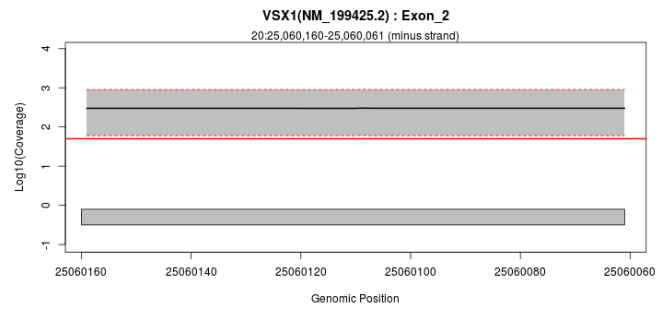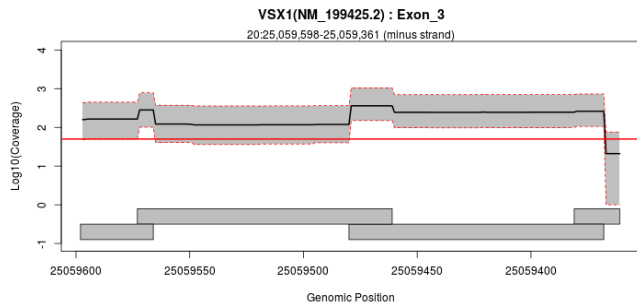

## Exon Overview: WNT10A : NM\_025216.2

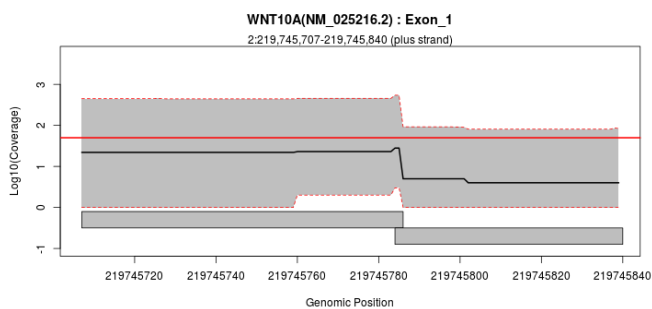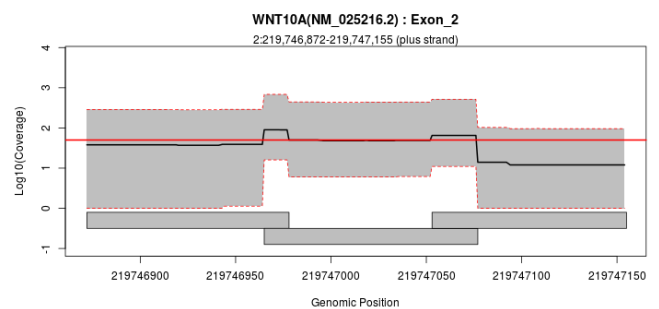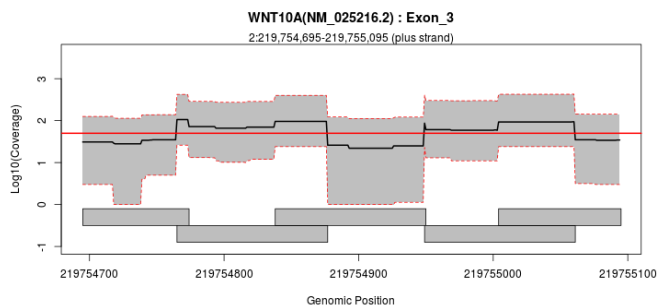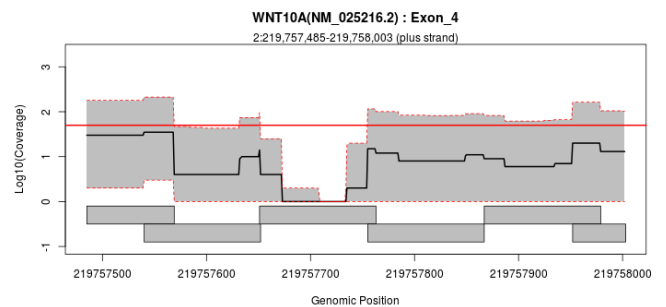

# Exon Overview: ZEB1 : NM\_001128128.2

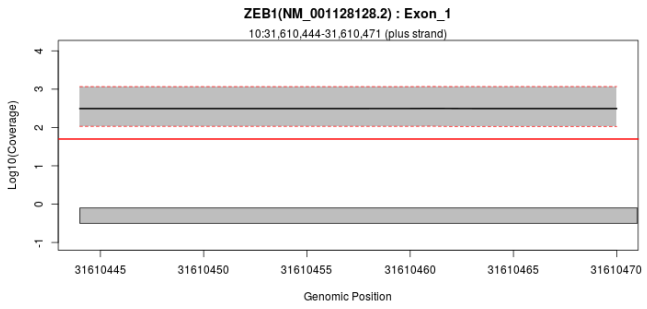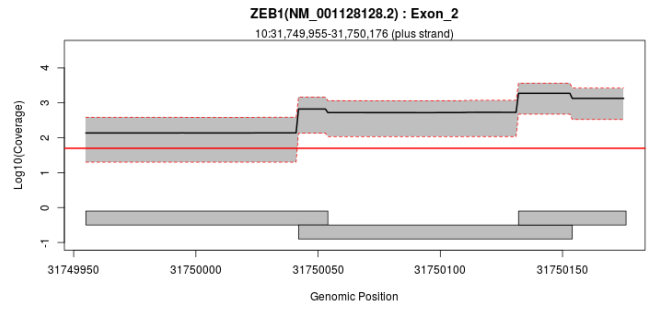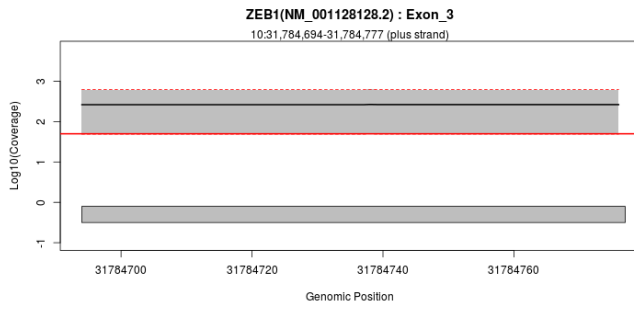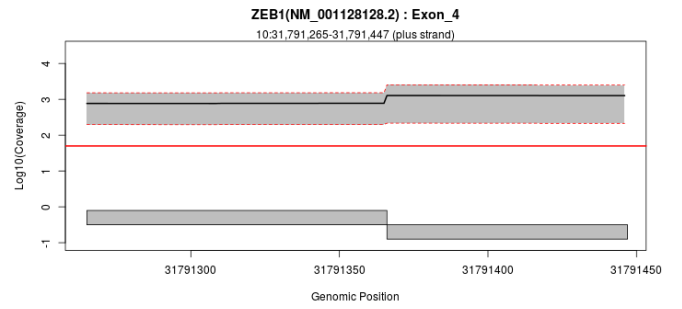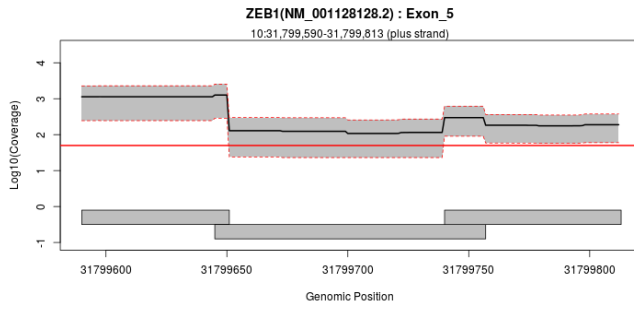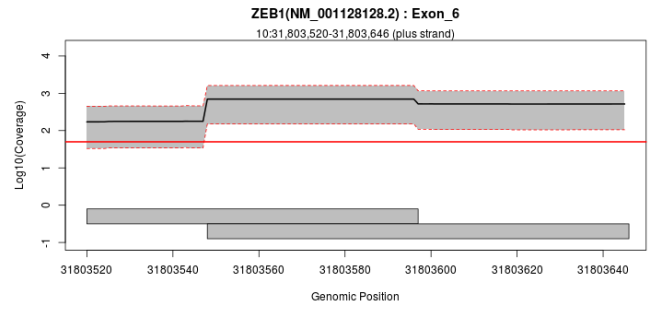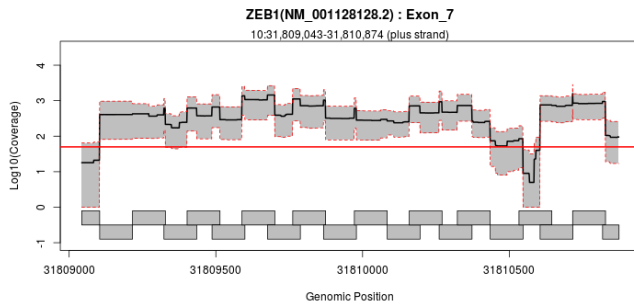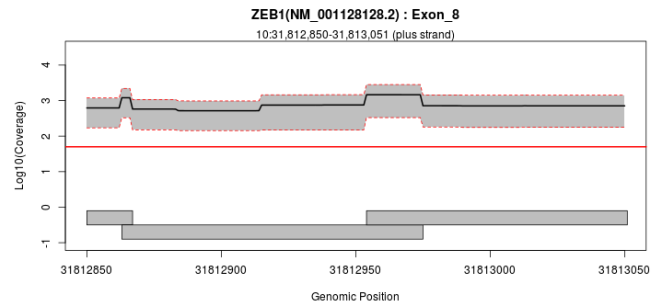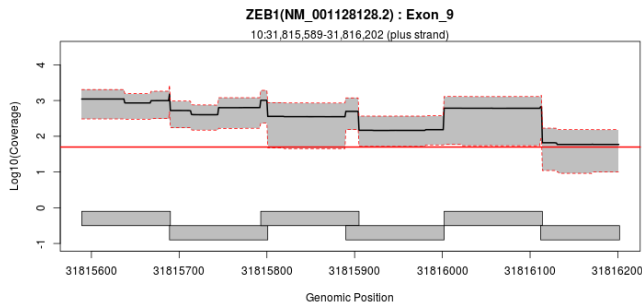



## Exon Overview: ZEB1 : NM\_001174093.1

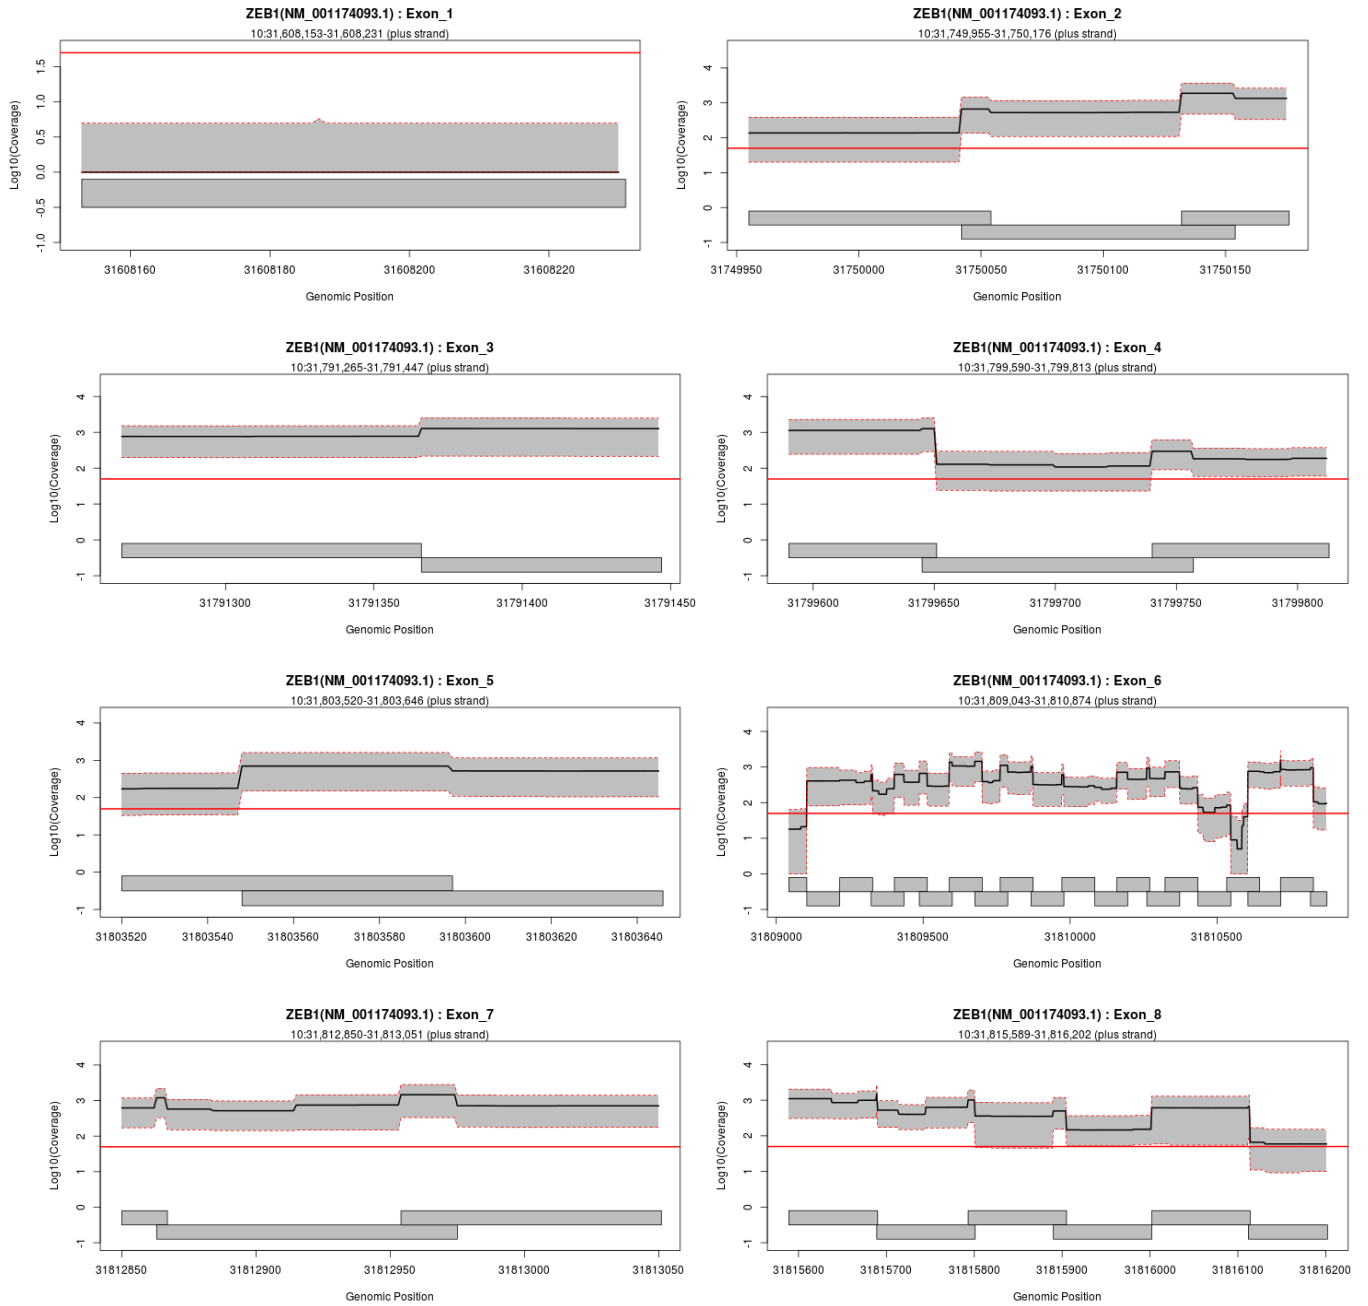

## Exon Overview: ZEB1 : NM\_001174094.1

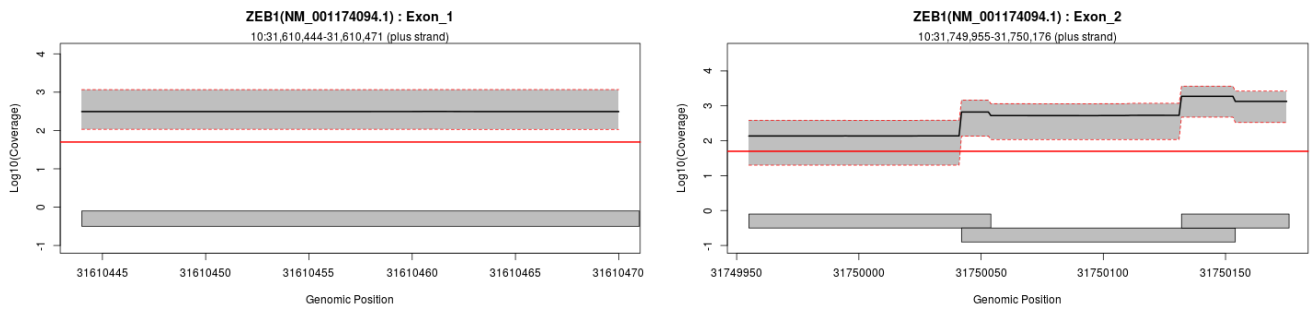

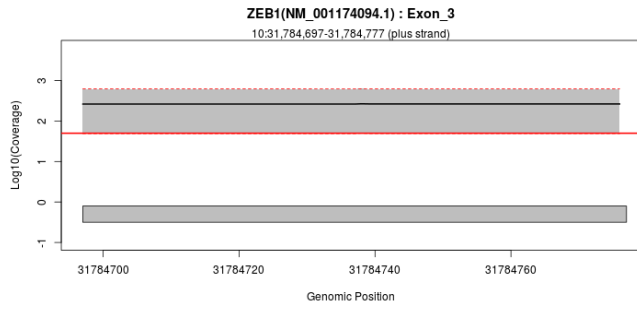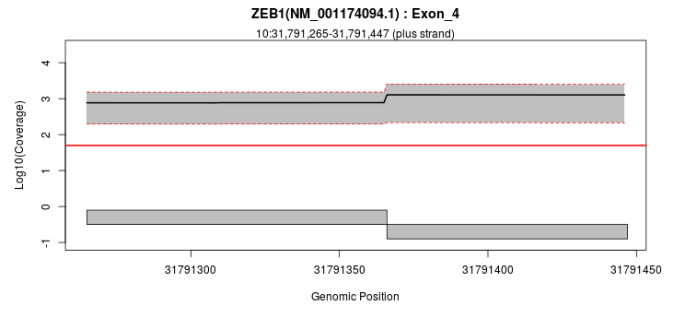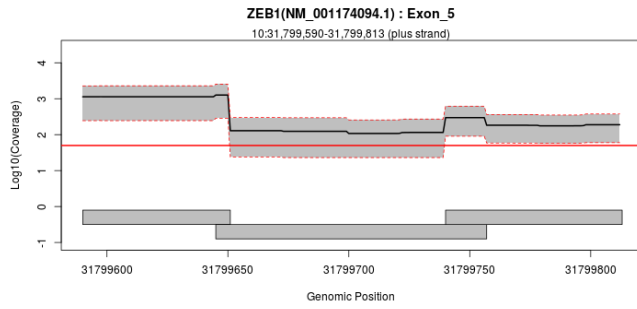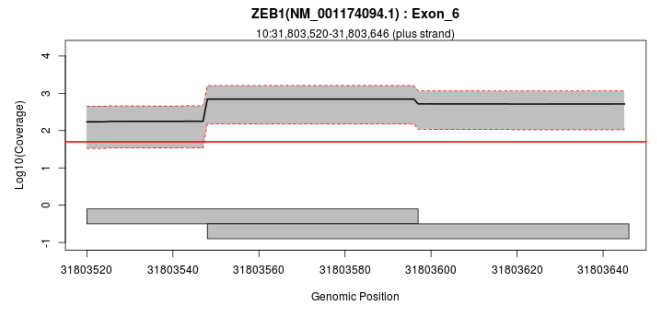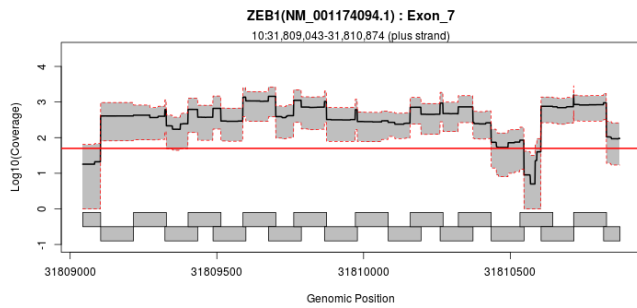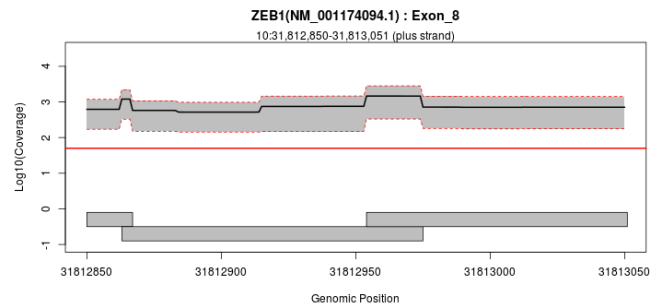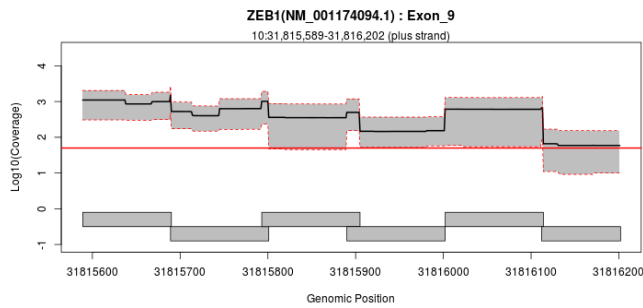

## Exon Overview: ZEB1 : NM\_001174095.1

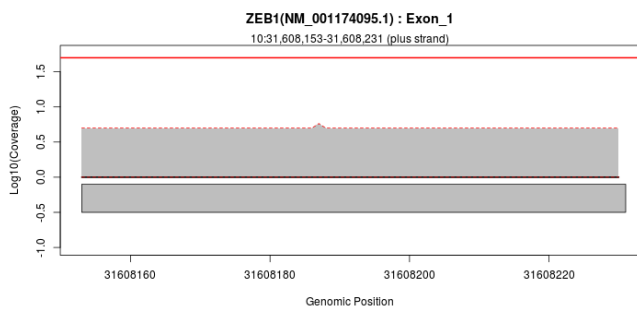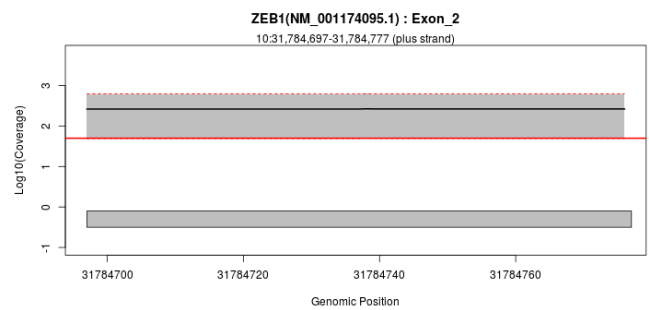

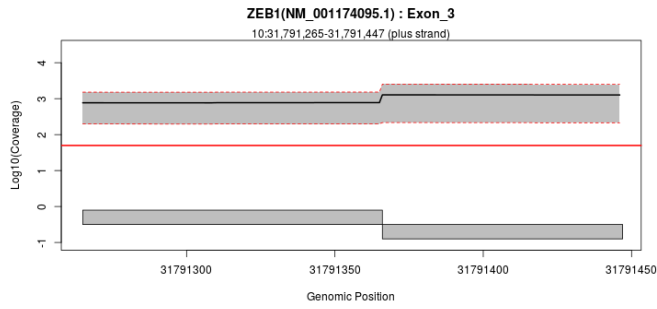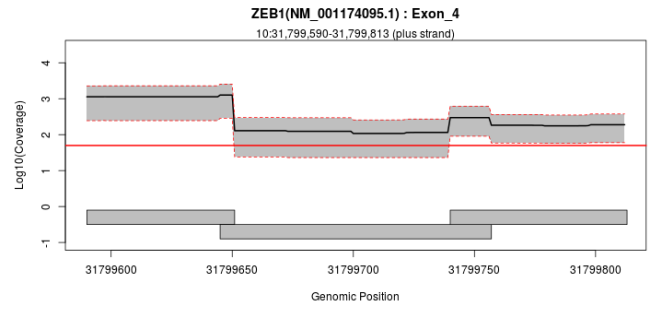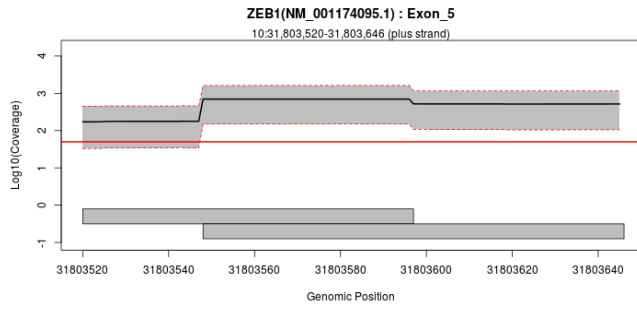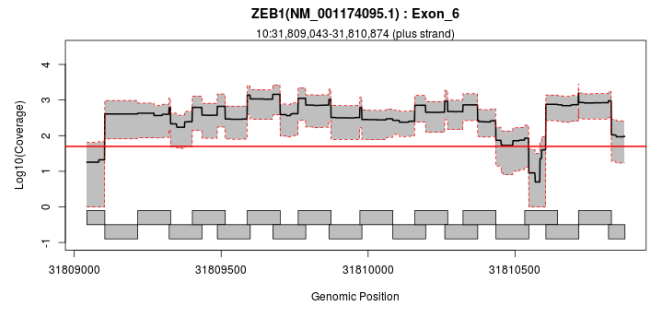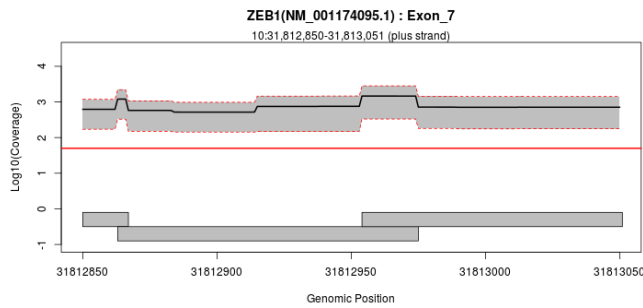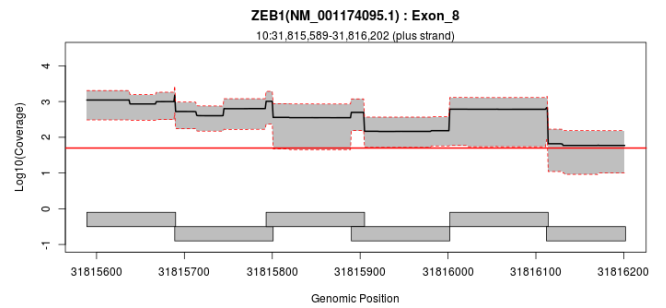

## Exon Overview: ZEB1 : NM\_001174096.1

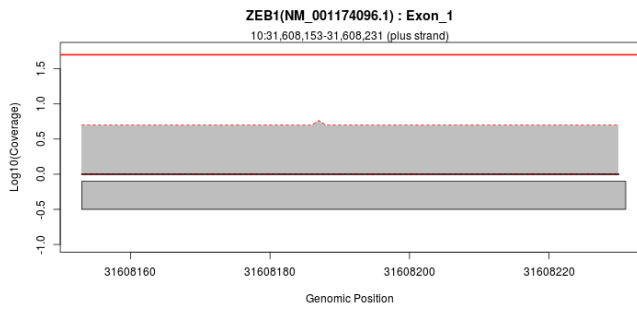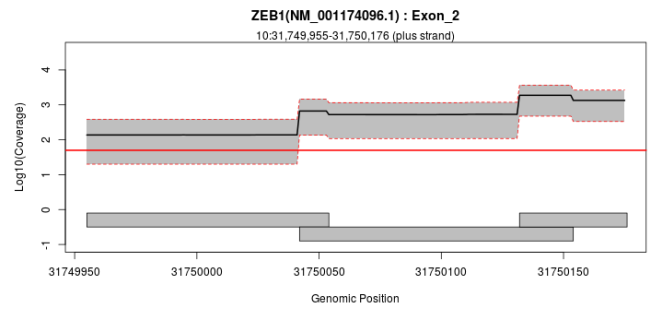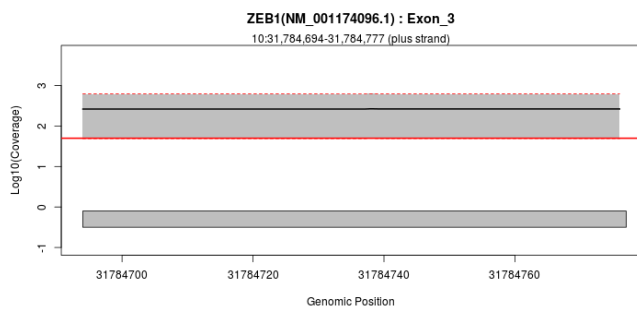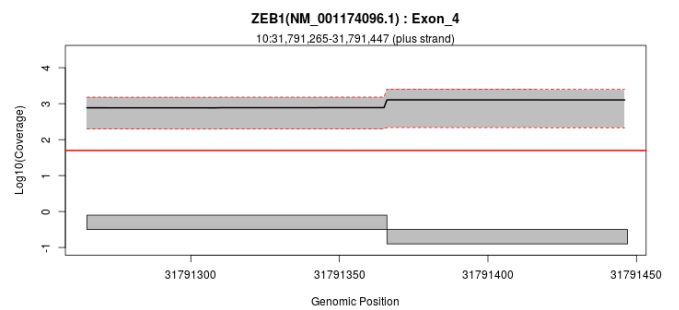

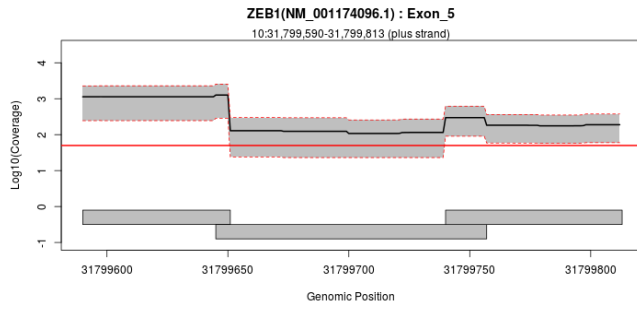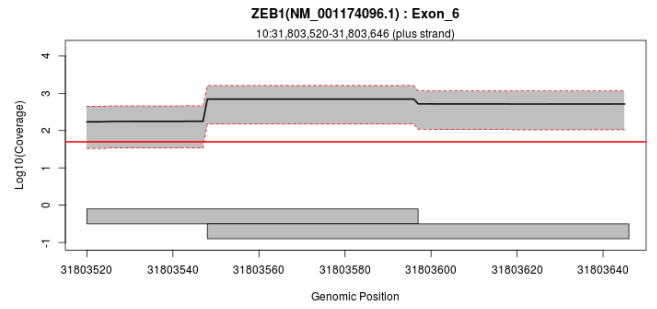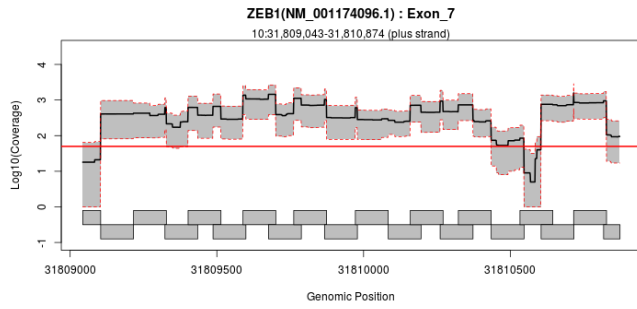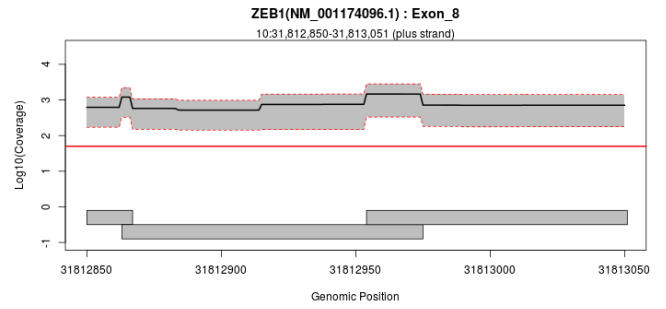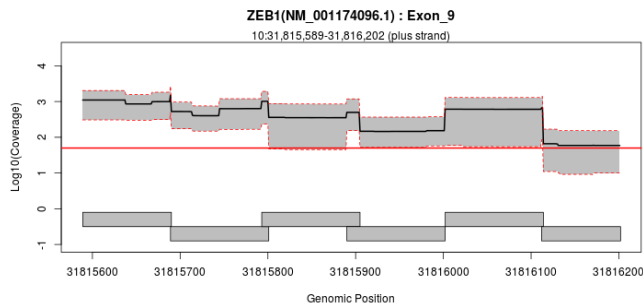

## Exon Overview: ZEB1 : NM\_001323638.1

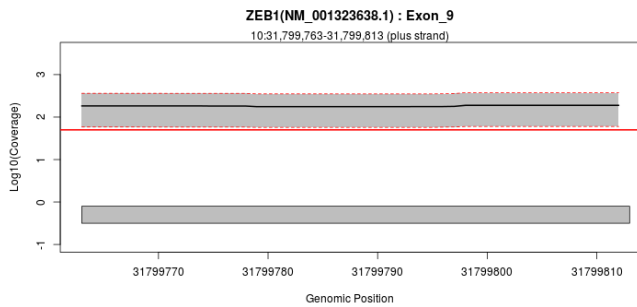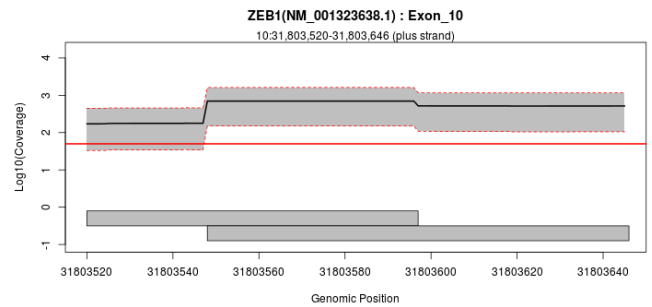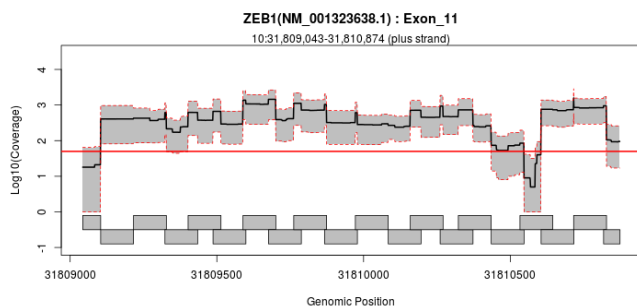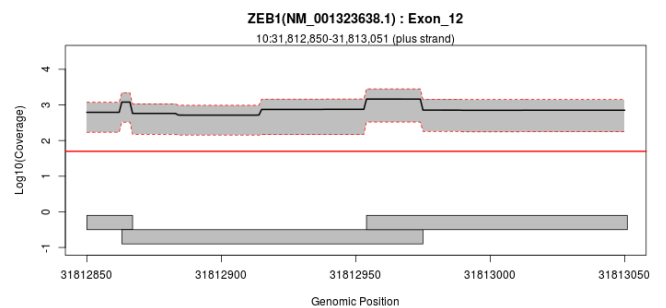

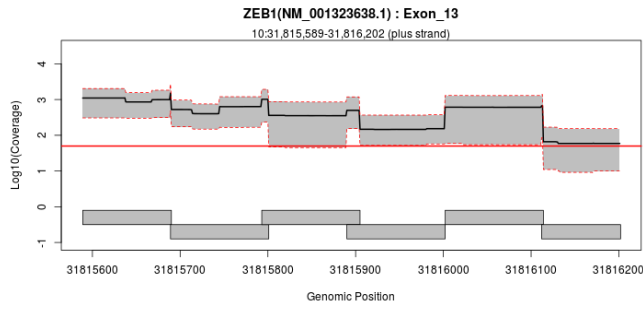

**Exon Overview: ZEB1 : NM\_001323641.1**

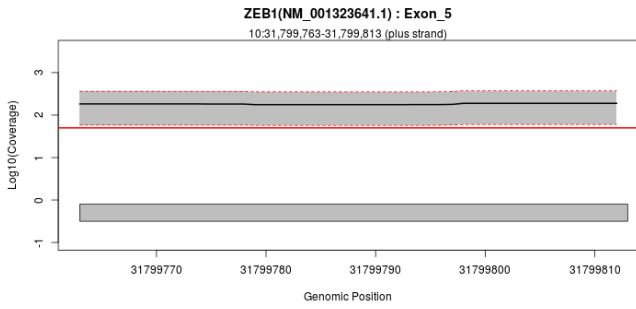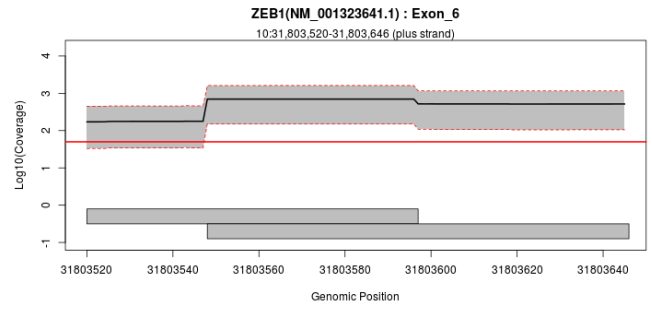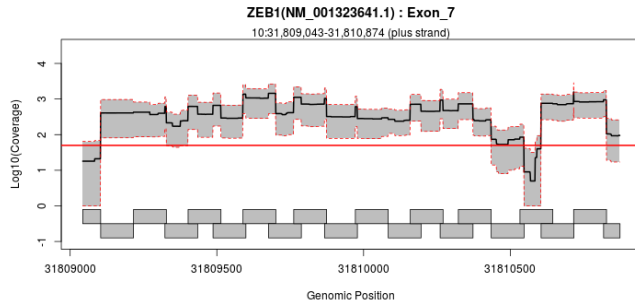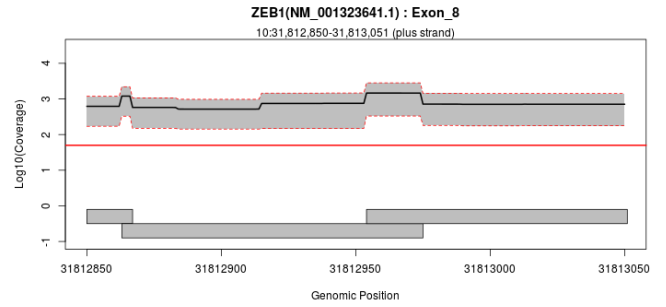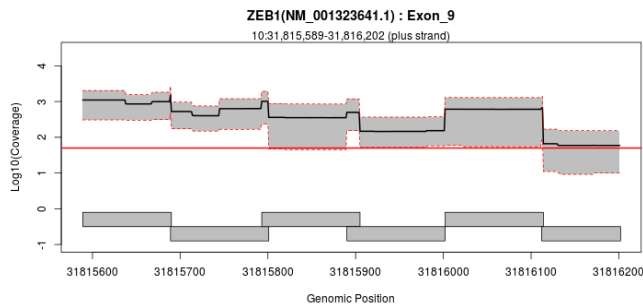

**Exon Overview: ZEB1 : NM\_001323642.1**

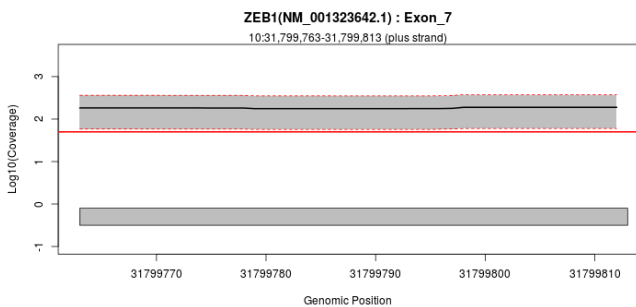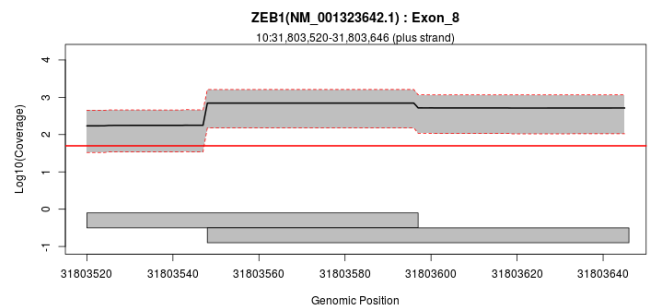

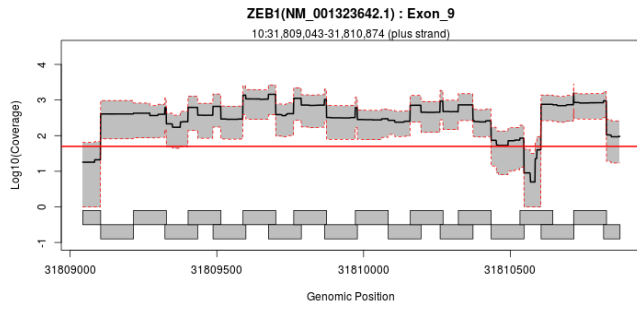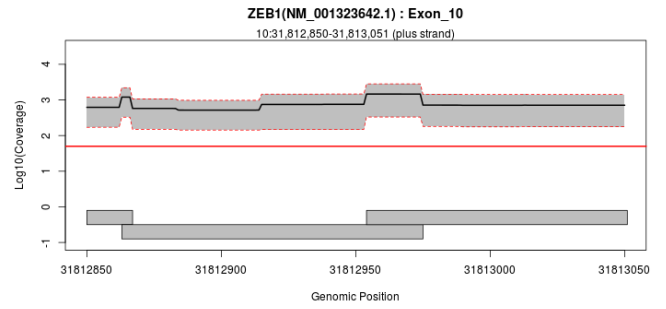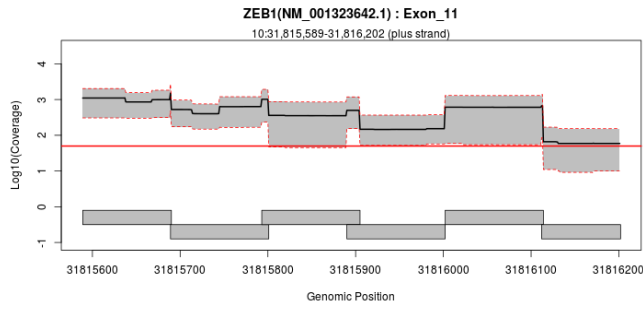

### Exon Overview: ZEB1 : NM\_001323643.1

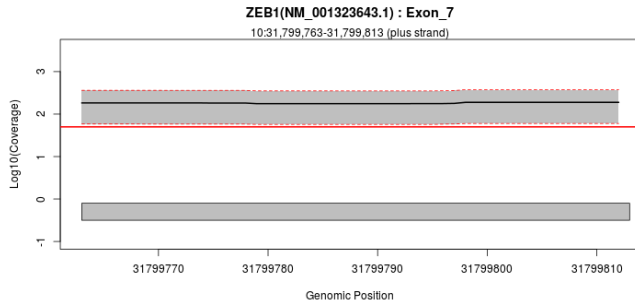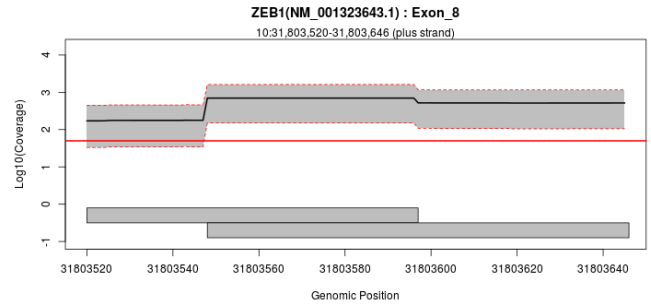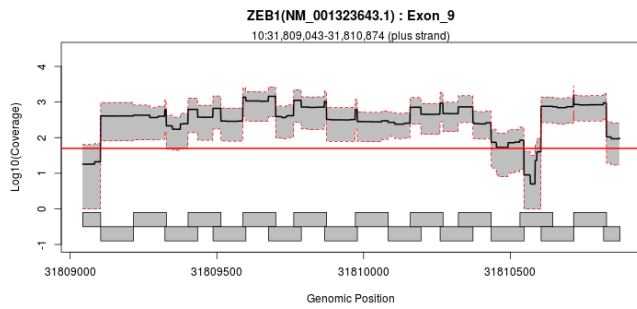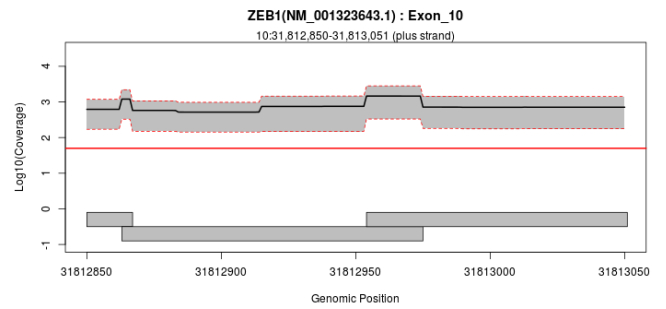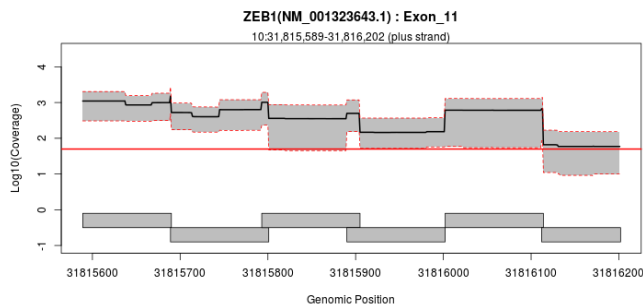

## Exon Overview: ZEB1 : NM\_001323644.1

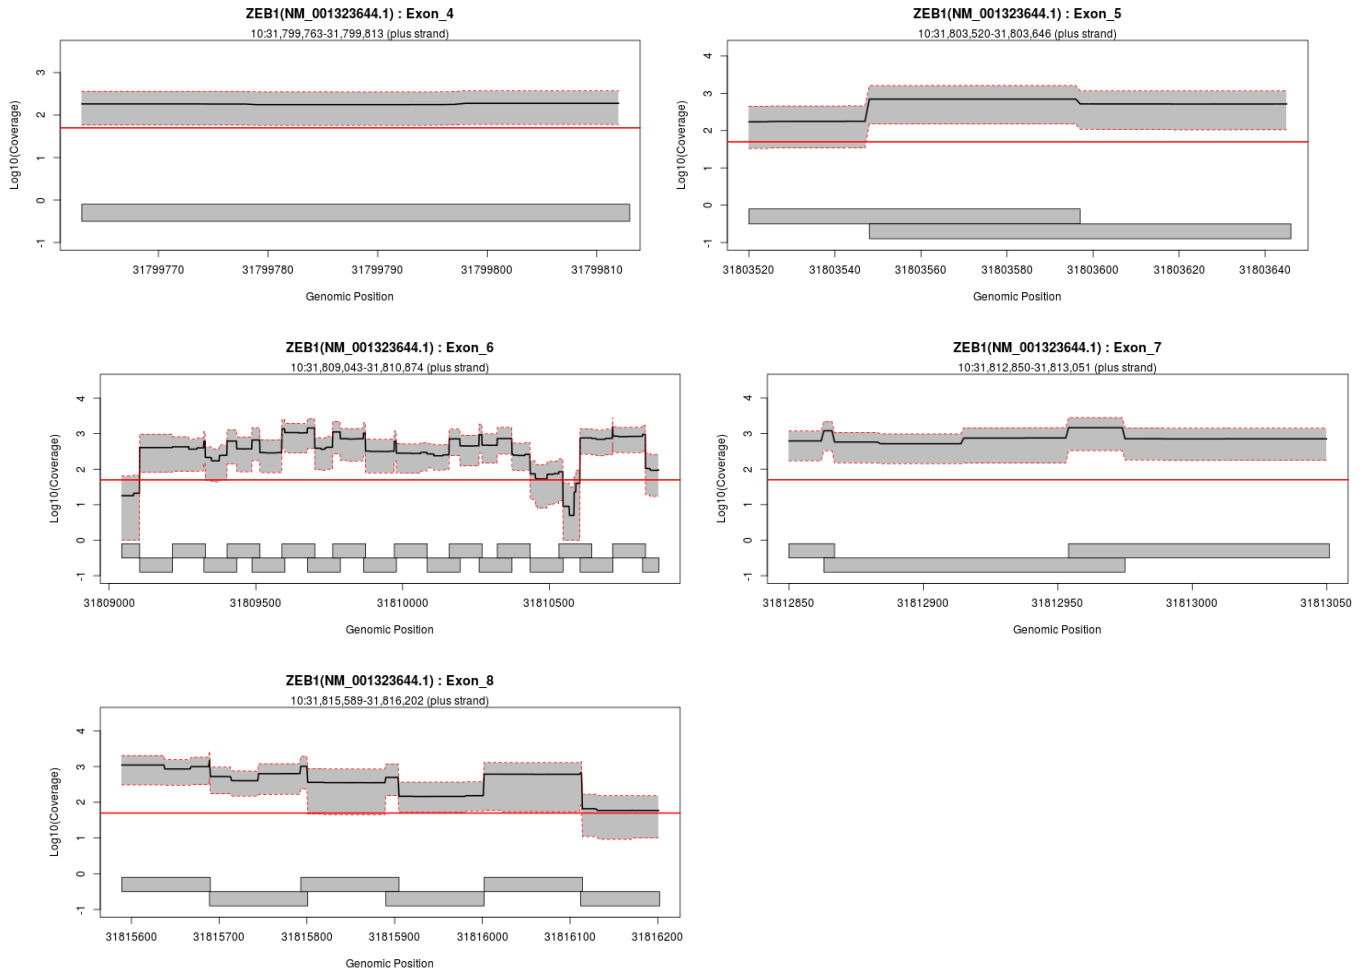

## Exon Overview: ZEB1 : NM\_001323645.1

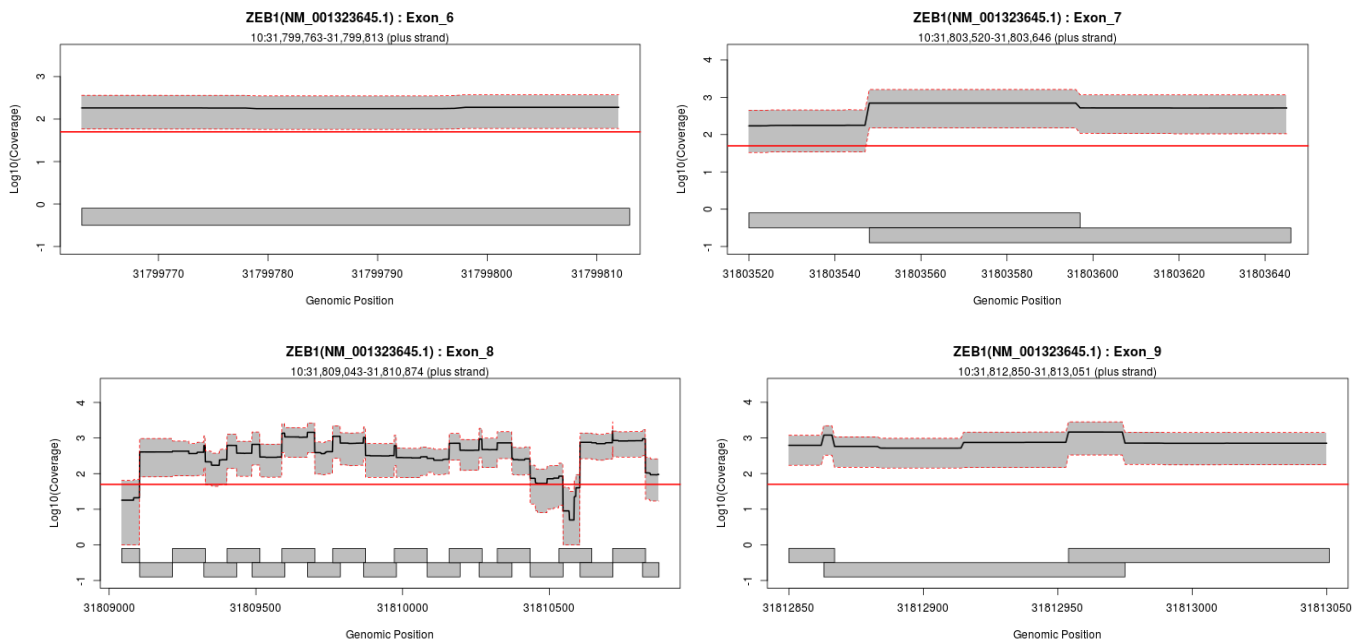

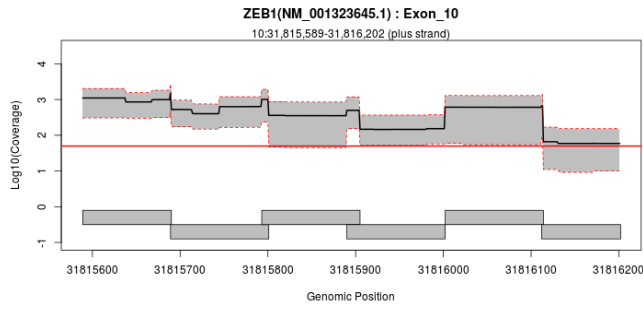

## Exon Overview: ZEB1 : NM\_001323646.1

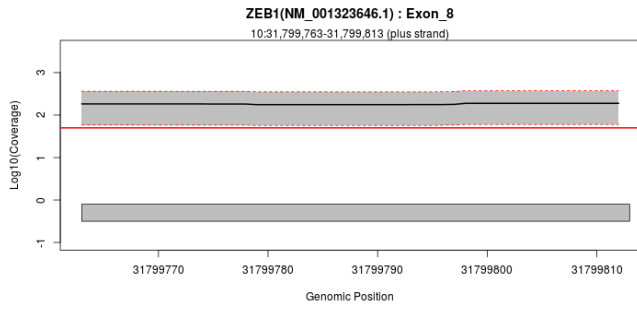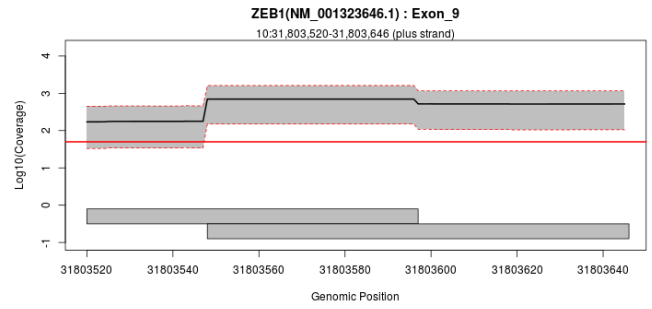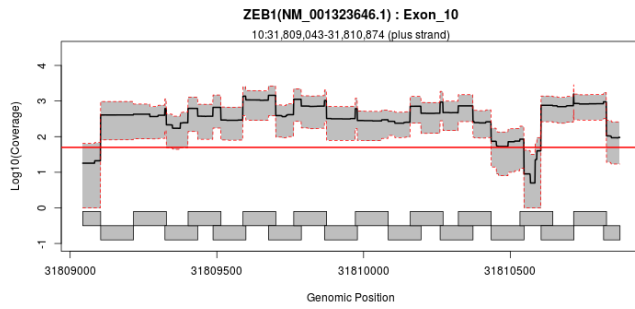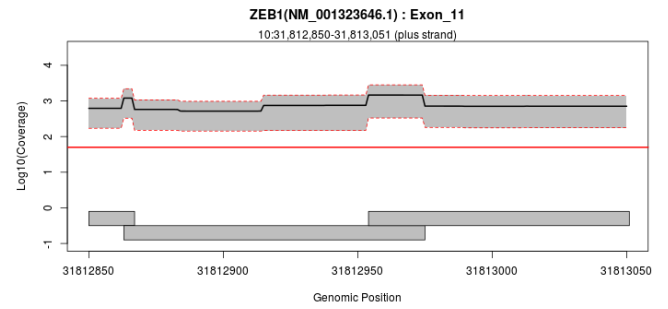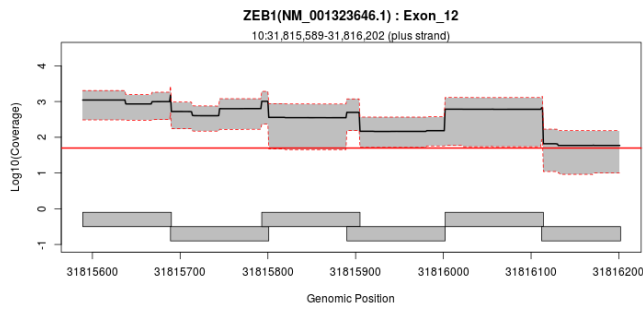

## Exon Overview: ZEB1 : NM\_001323647.1

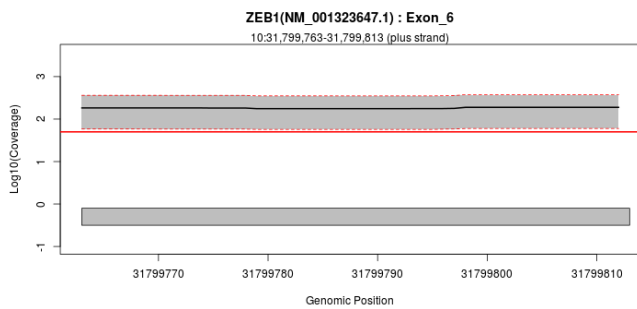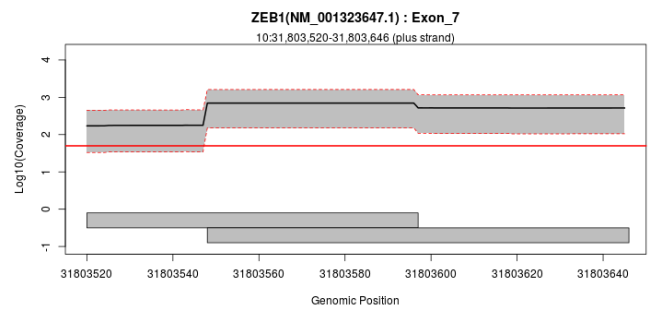



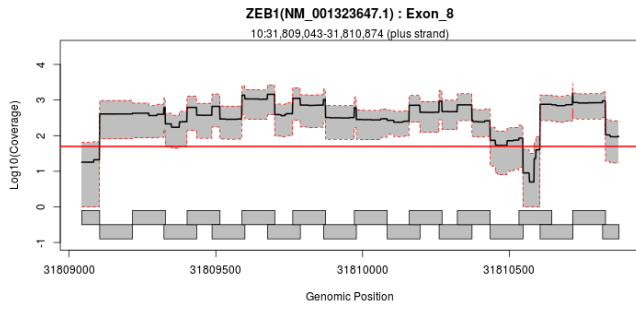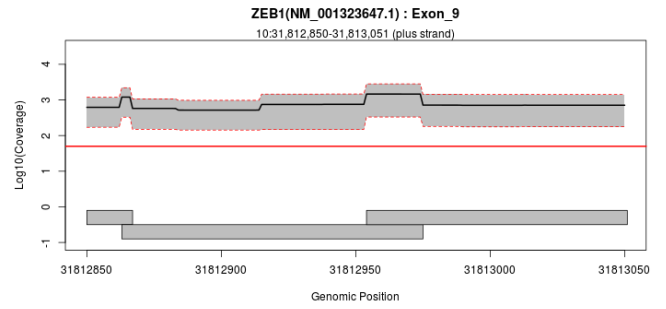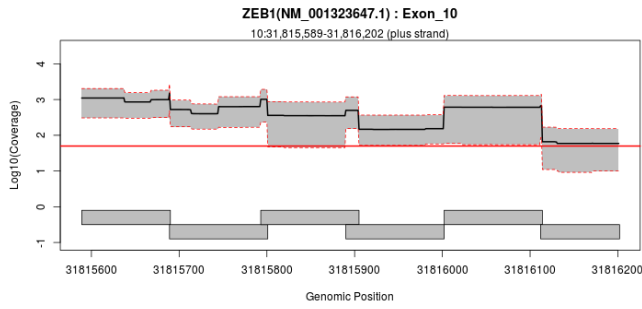

## Exon Overview: ZEB1 : NM\_001323648.1

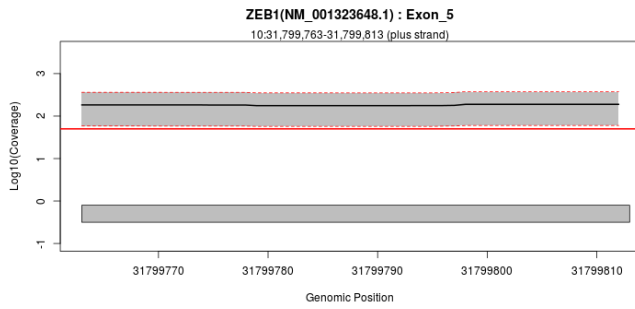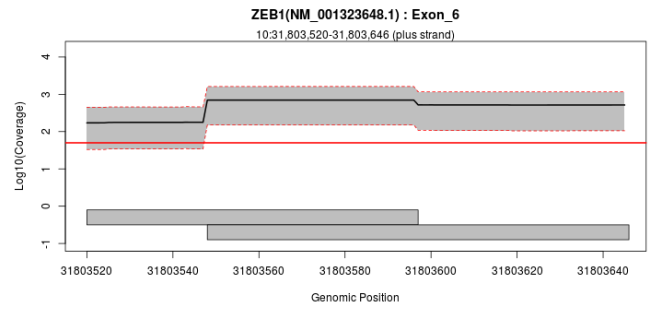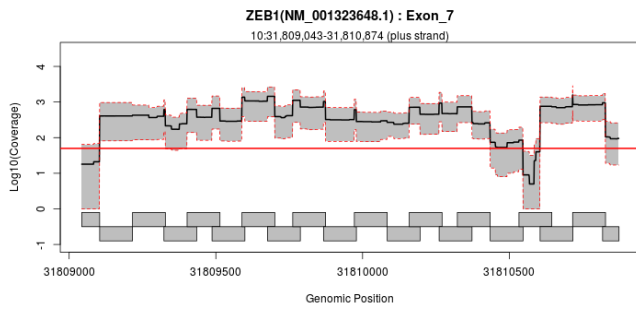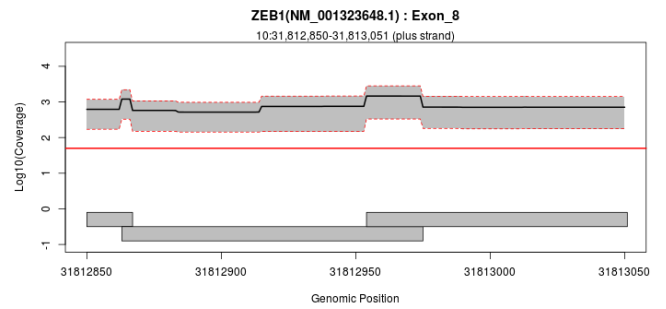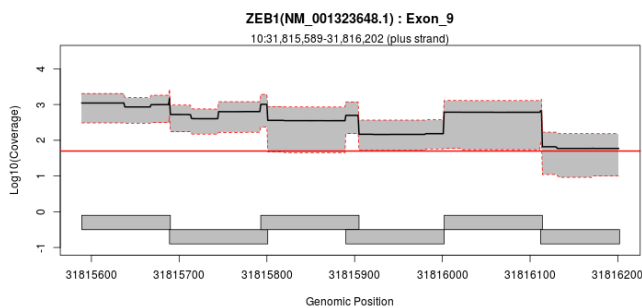

## Exon Overview: ZEB1 : NM\_001323649.1

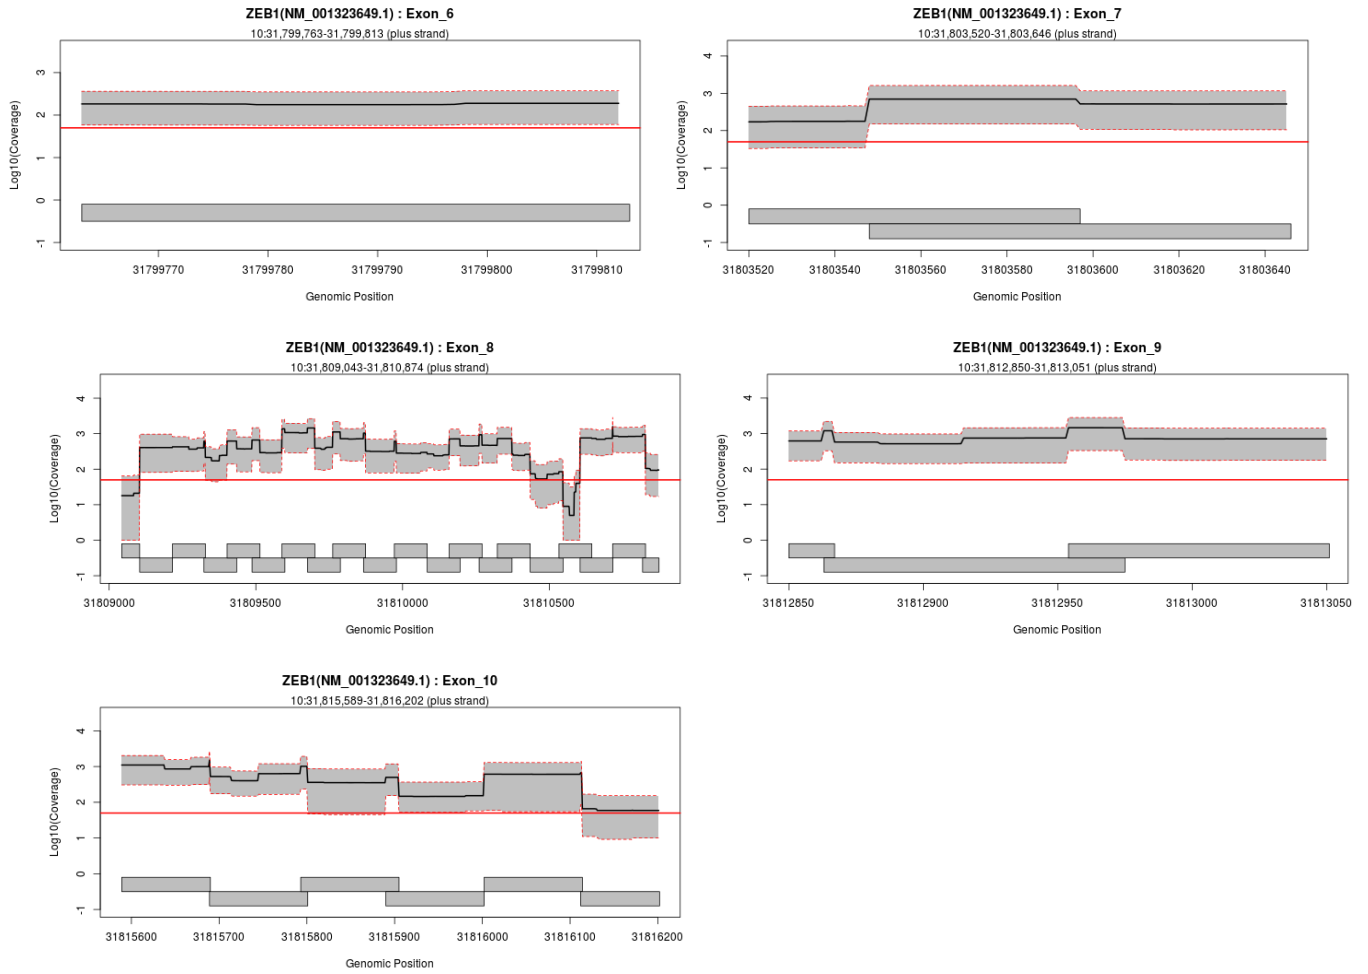

## Exon Overview: ZEB1 : NM\_001323650.1

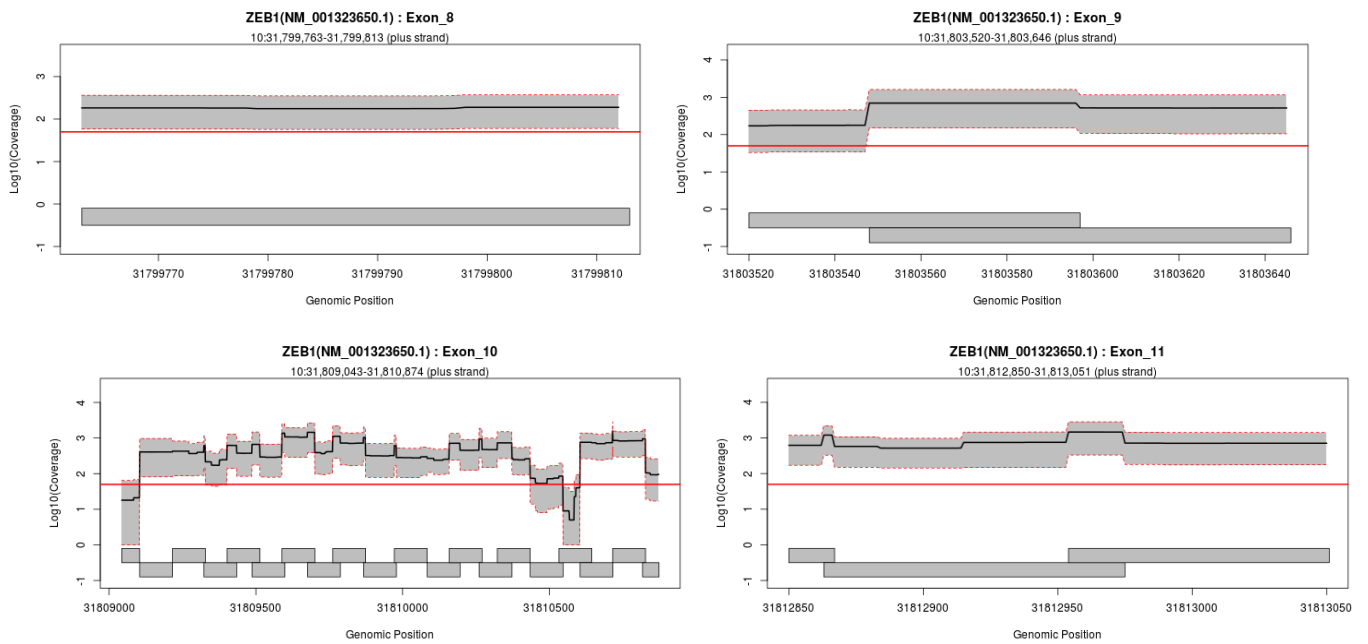

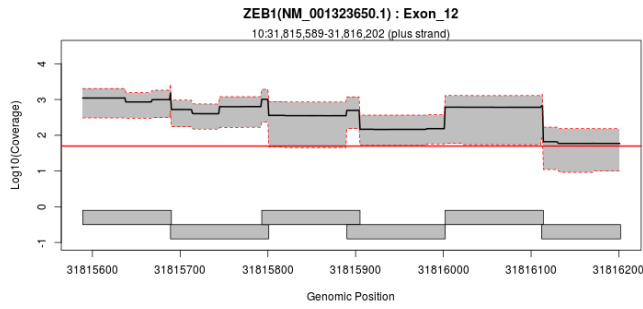

## Exon Overview: ZEB1 : NM\_001323651.1

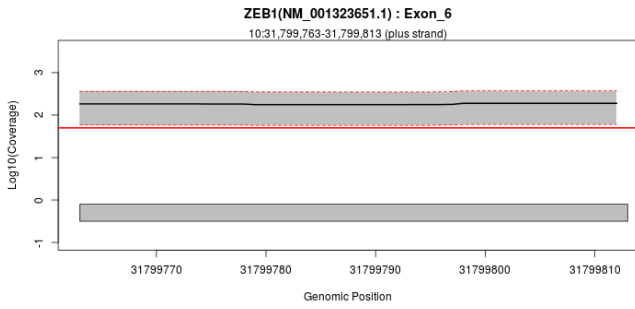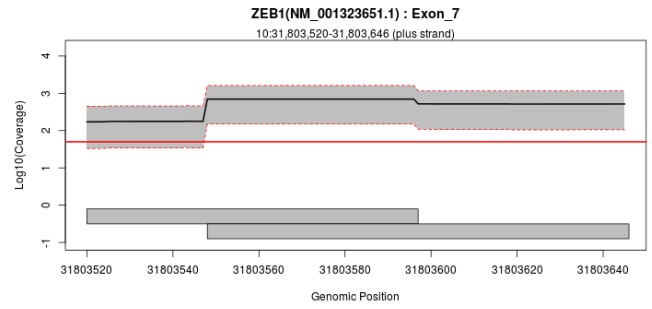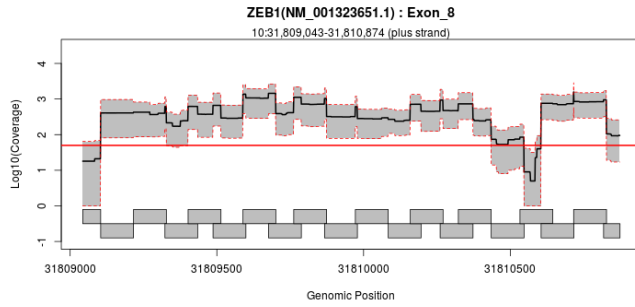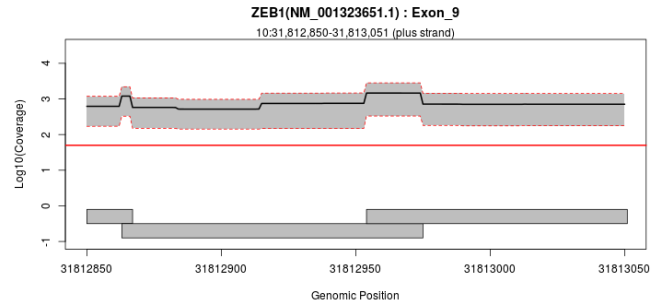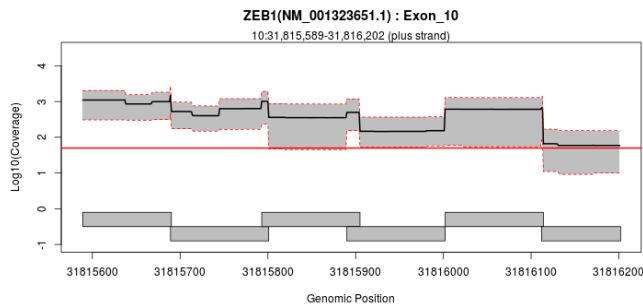

## Exon Overview: ZEB1 : NM\_001323652.1

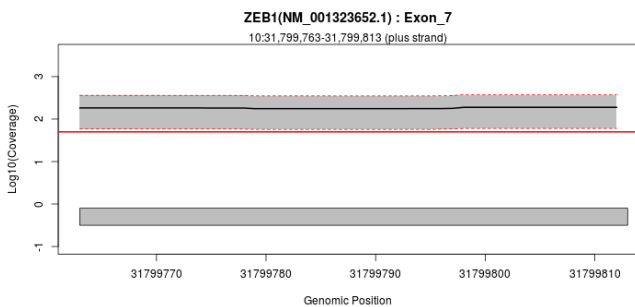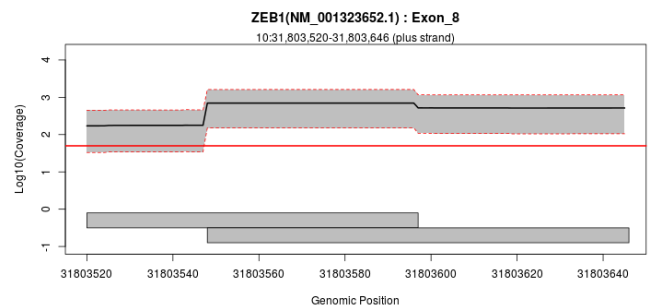

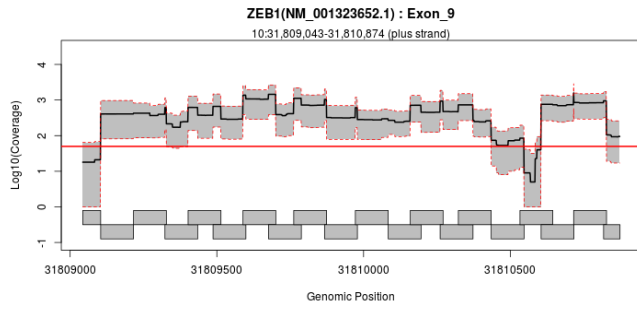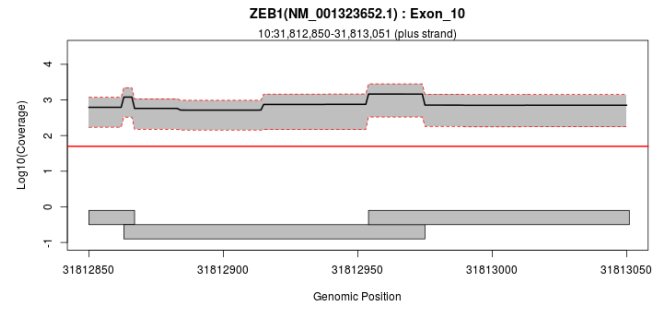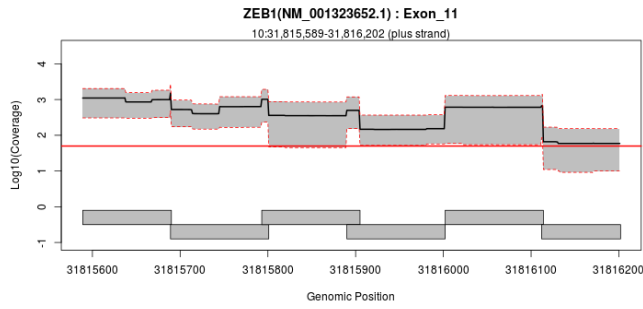

### Exon Overview: ZEB1 : NM\_001323653.1

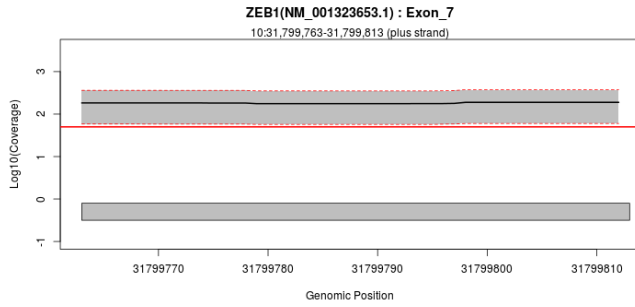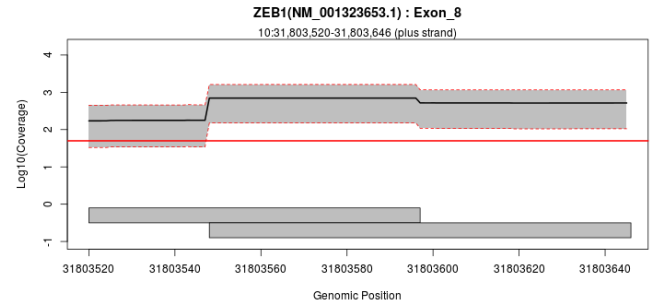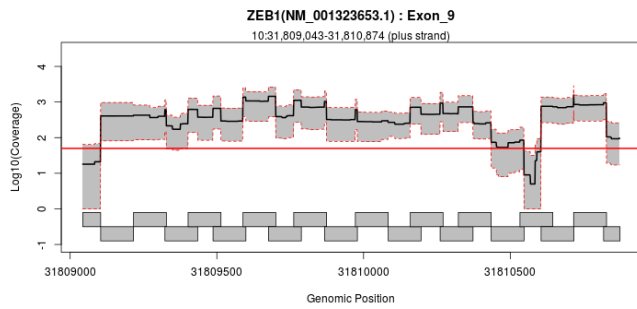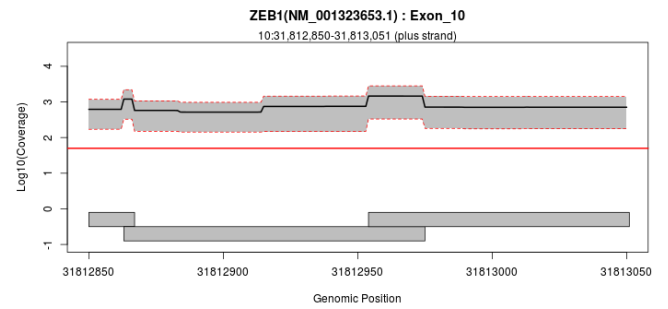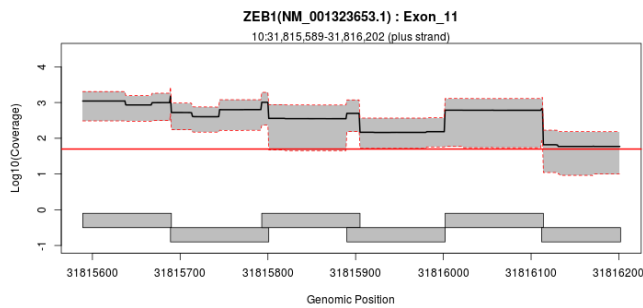

## Exon Overview: ZEB1 : NM\_001323654.1

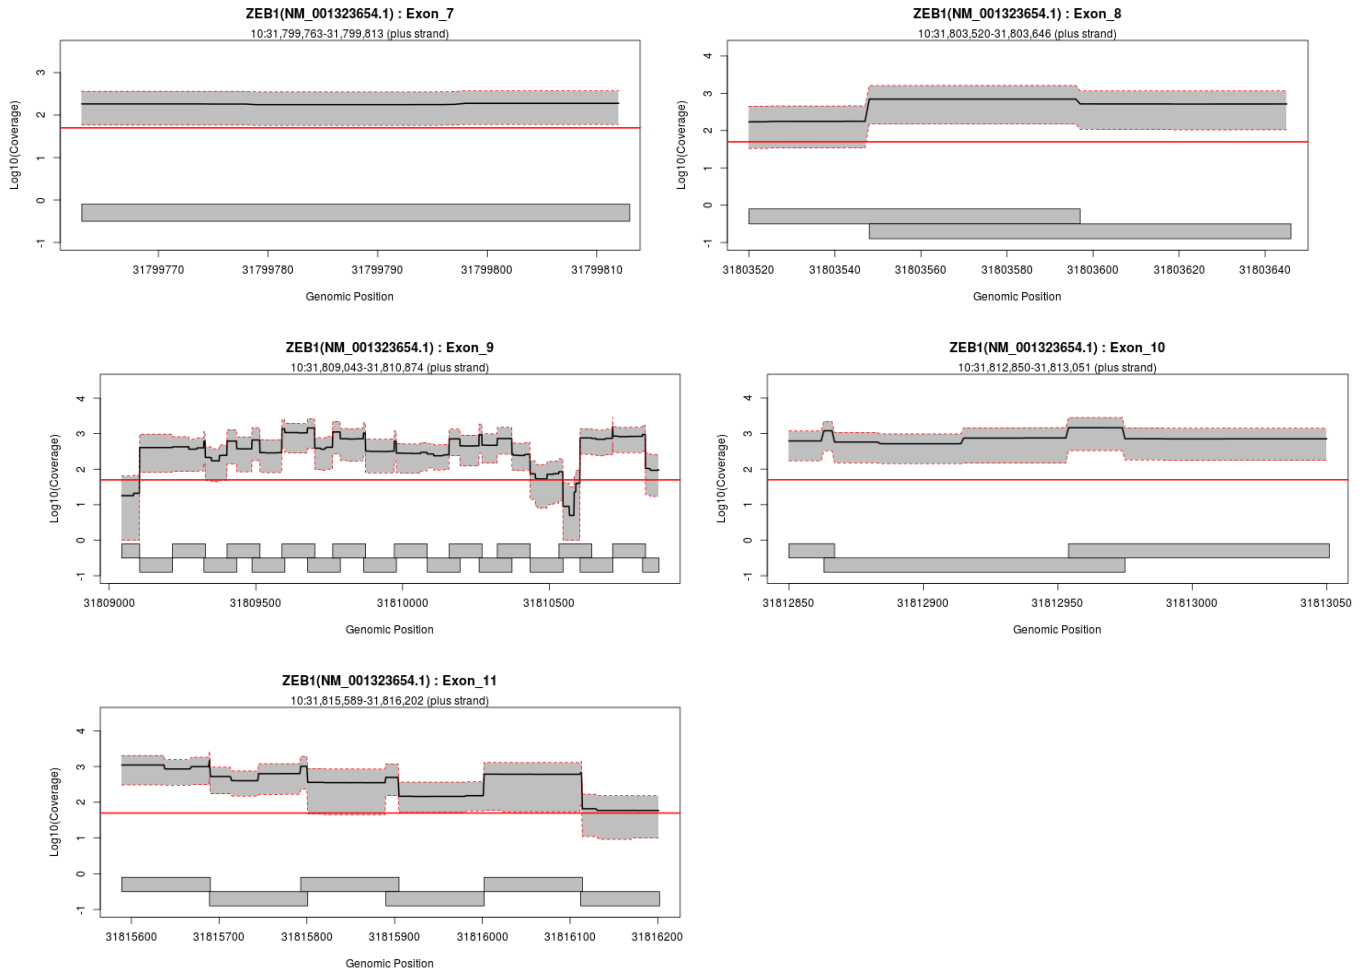

## Exon Overview: ZEB1 : NM\_001323655.1

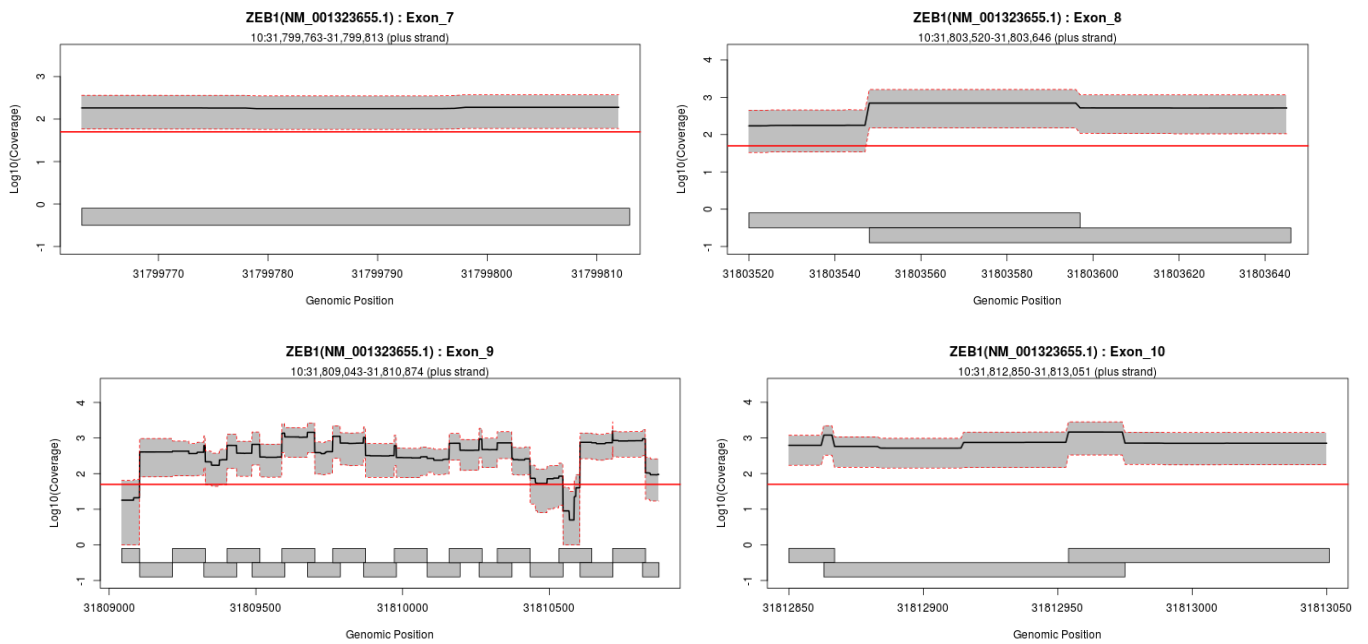

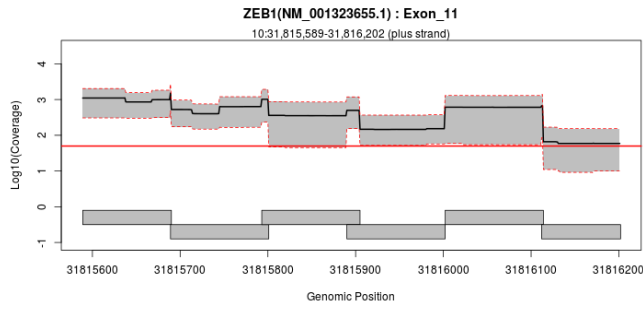

## Exon Overview: ZEB1 : NM\_001323656.1

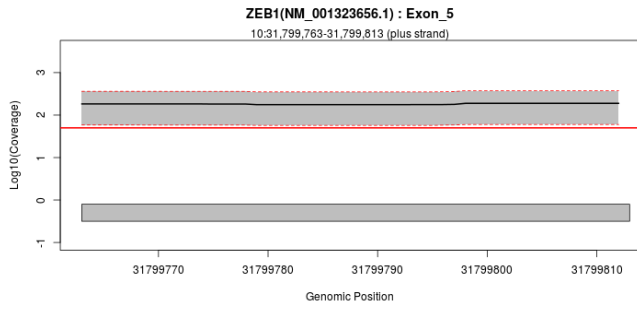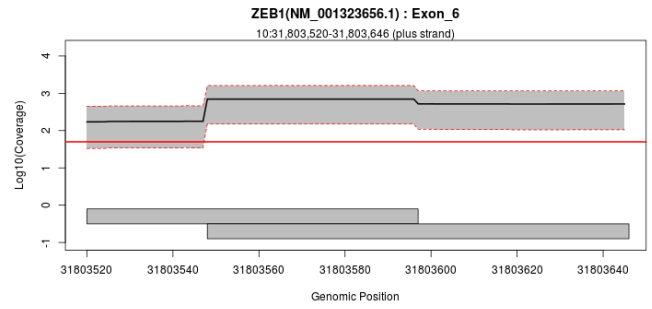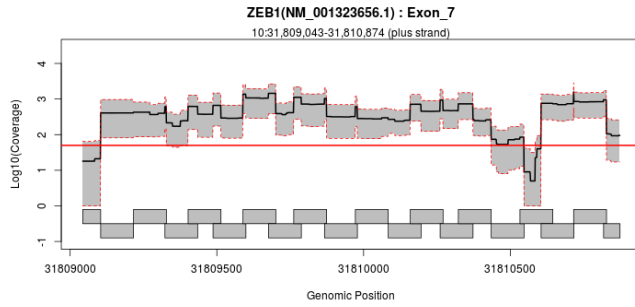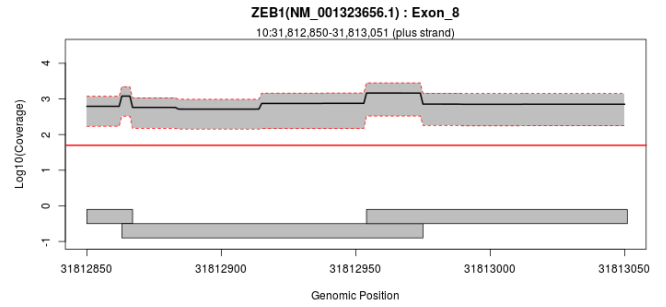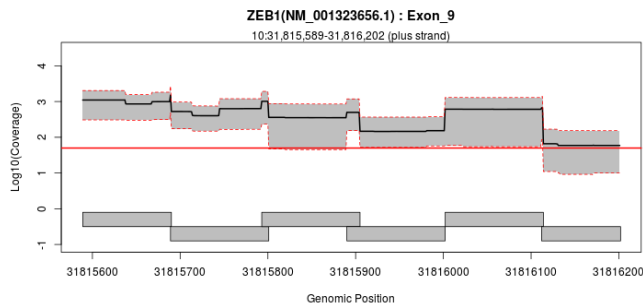

## Exon Overview: ZEB1 : NM\_001323657.1

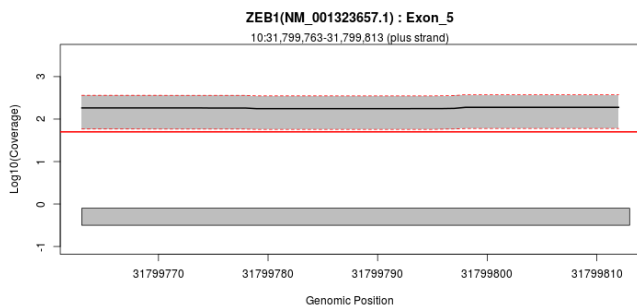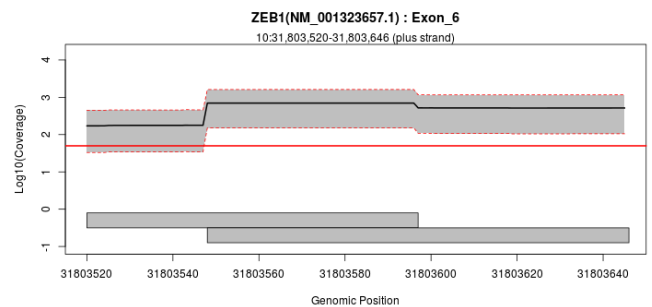

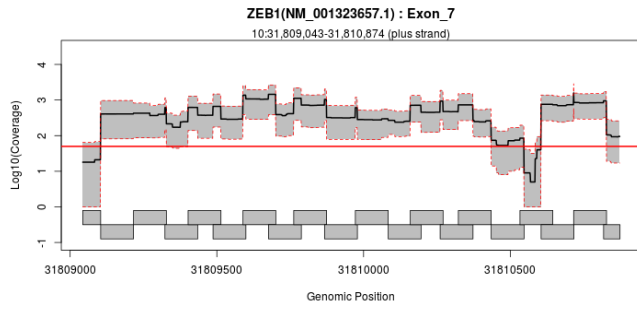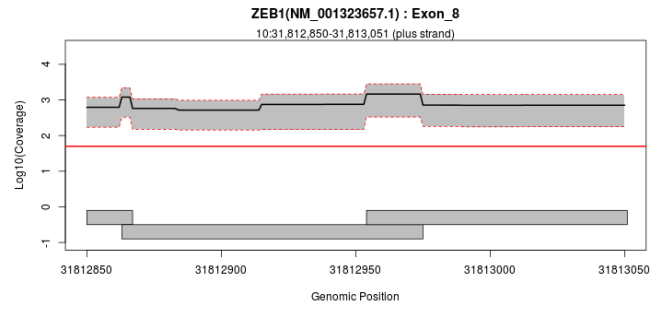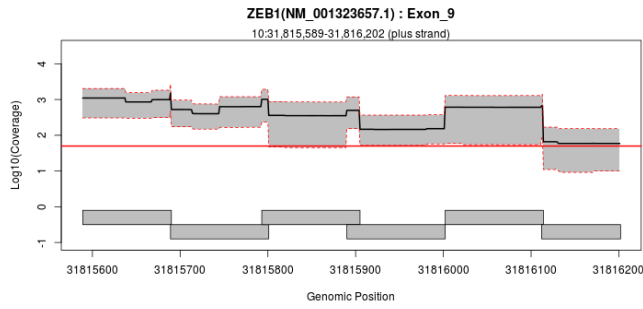

### Exon Overview: ZEB1 : NM\_001323658.1

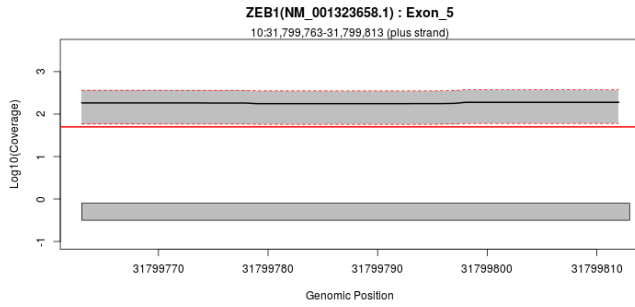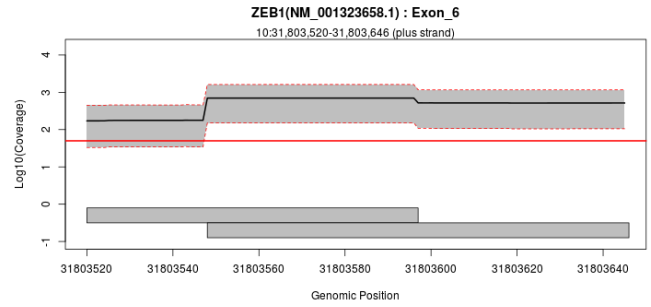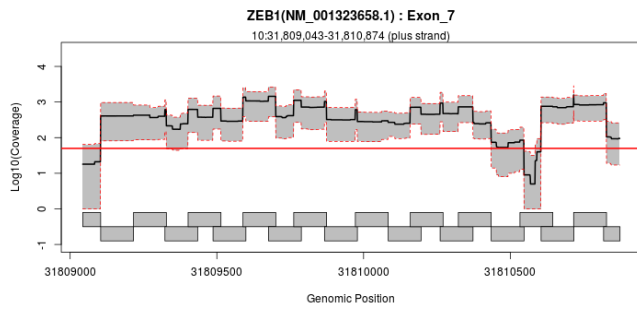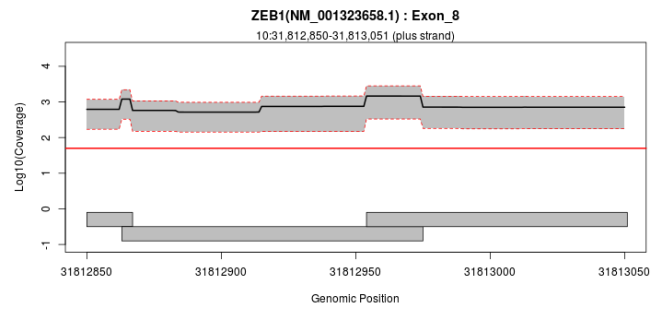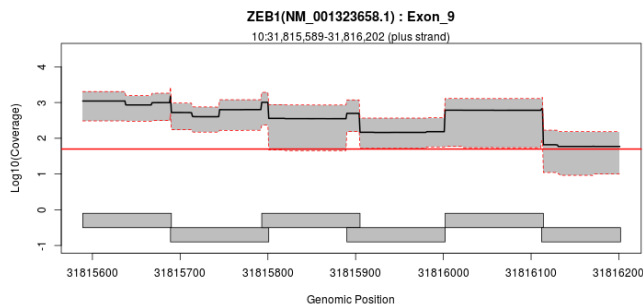

## Exon Overview: ZEB1 : NM\_001323659.1

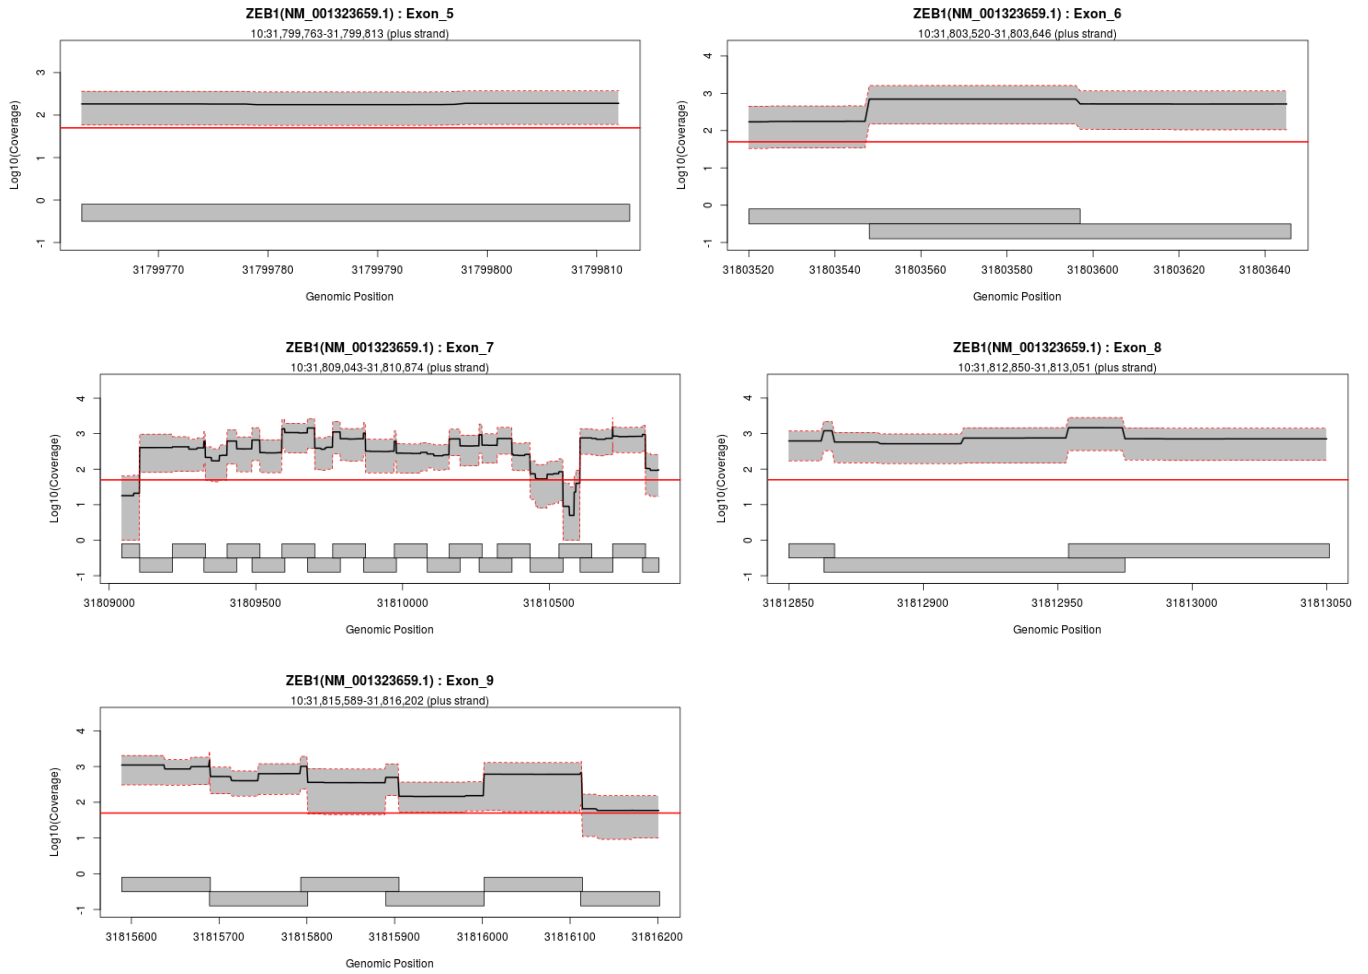

## Exon Overview: ZEB1 : NM\_001323660.1

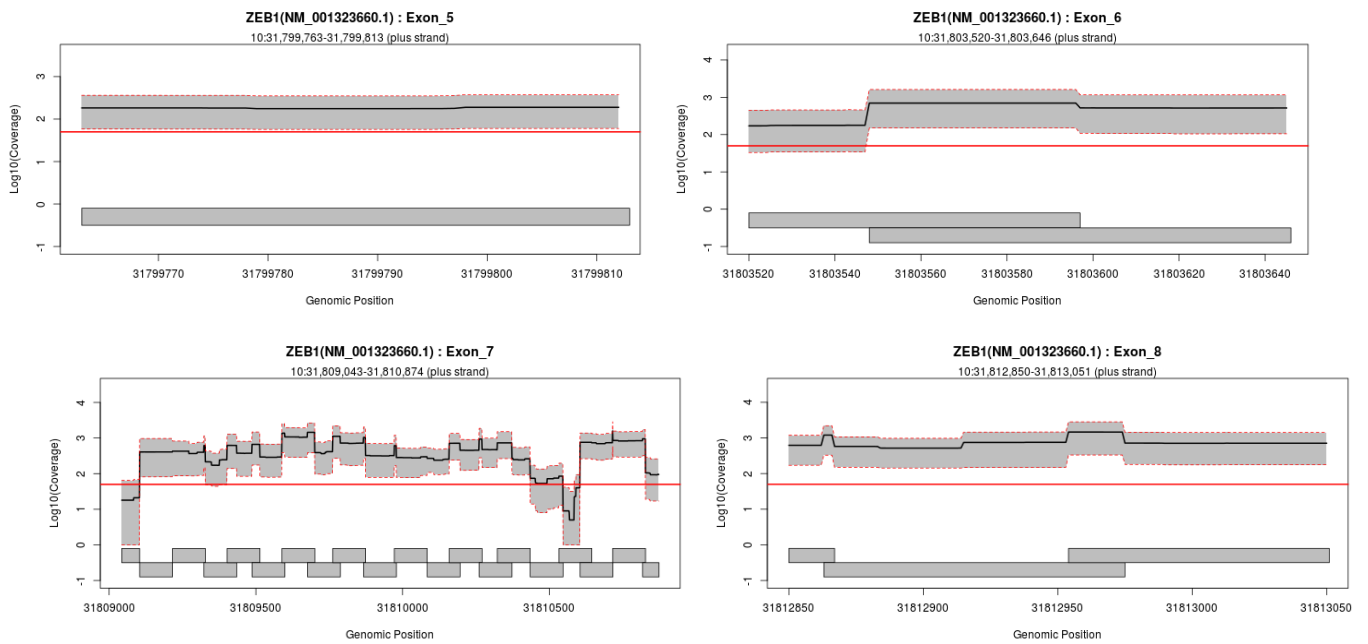



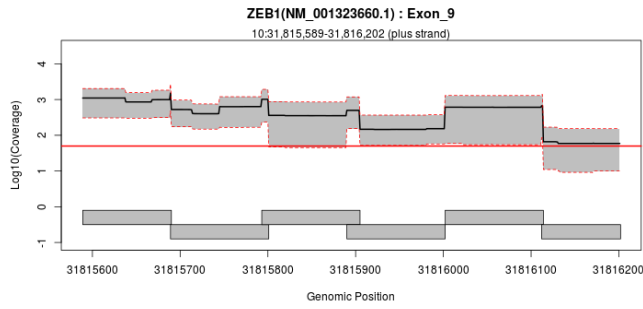

**Exon Overview: ZEB1 : NM\_001323661.1**

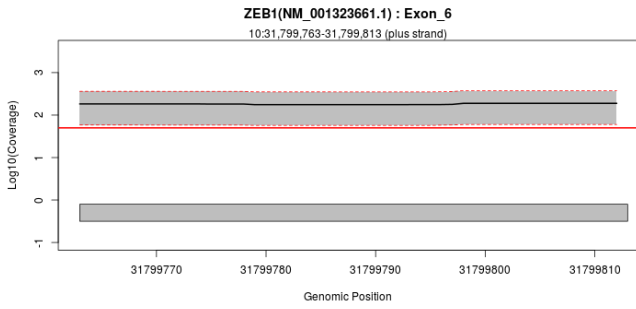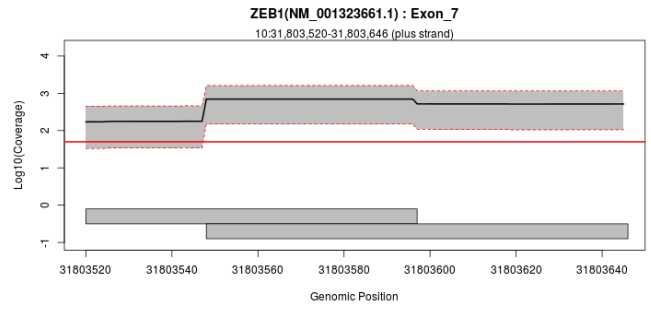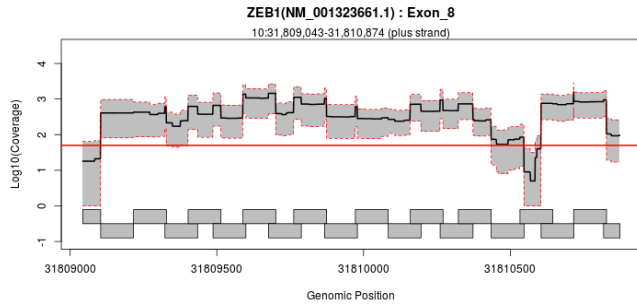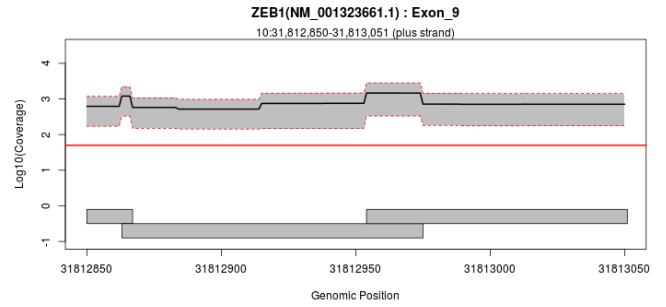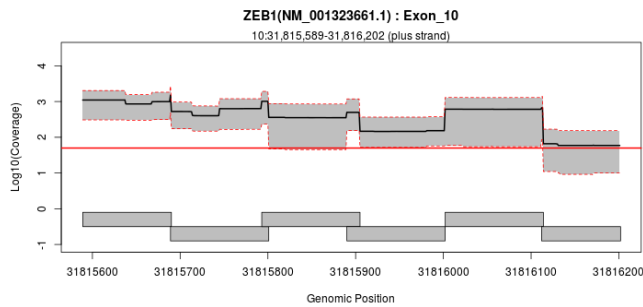

**Exon Overview: ZEB1 : NM\_001323662.1**

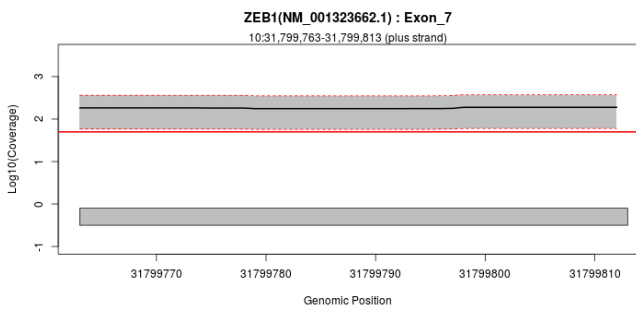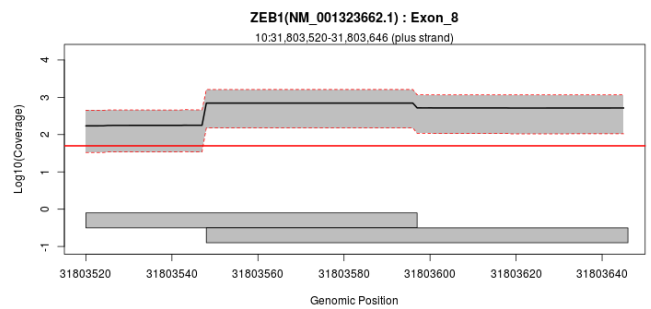

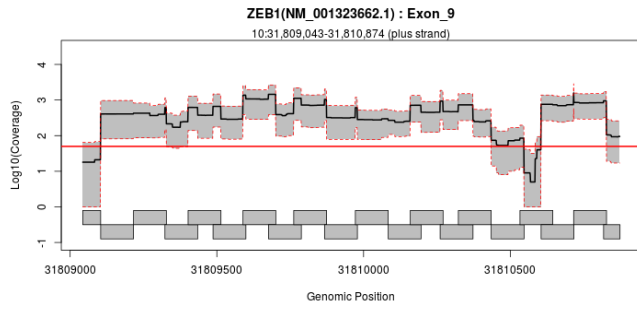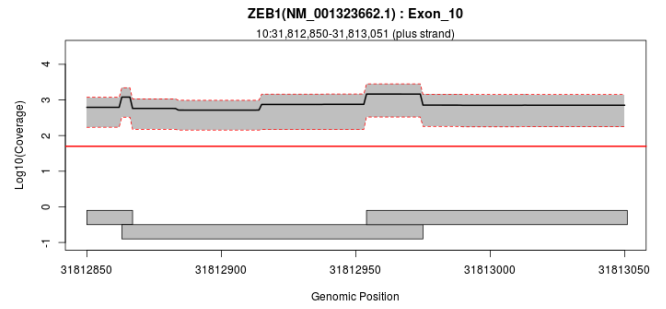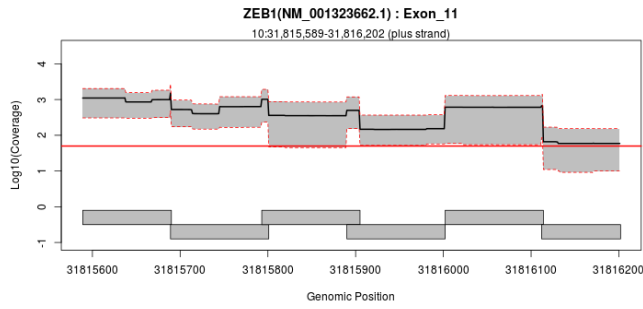

## Exon Overview: ZEB1 : NM\_001323663.1

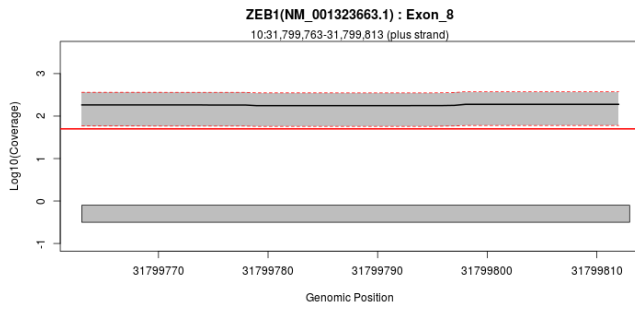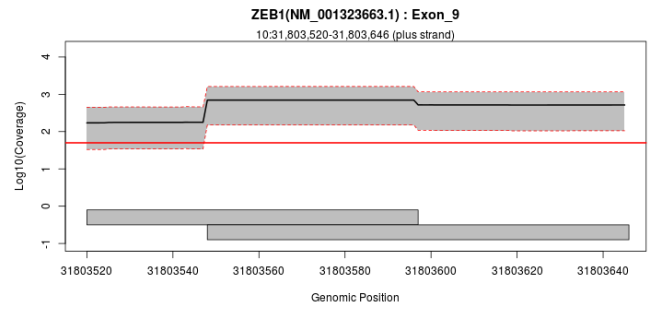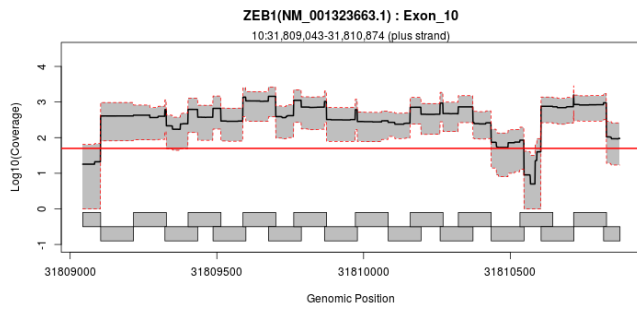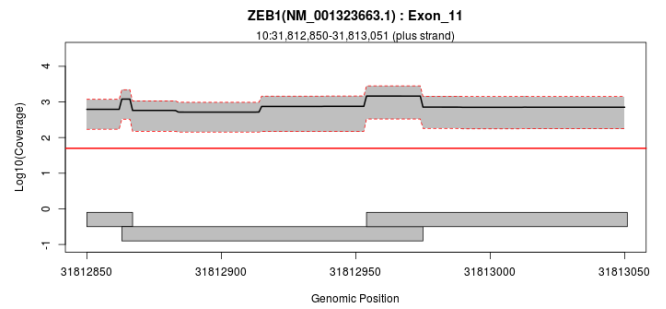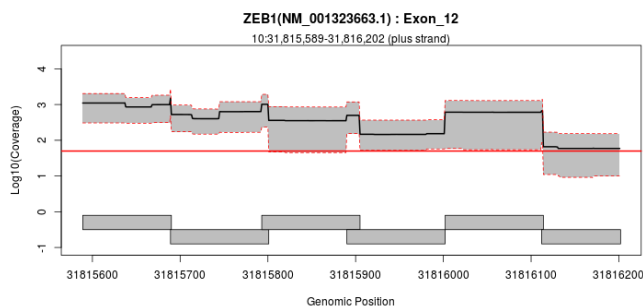

## Exon Overview: ZEB1 : NM\_001323664.1

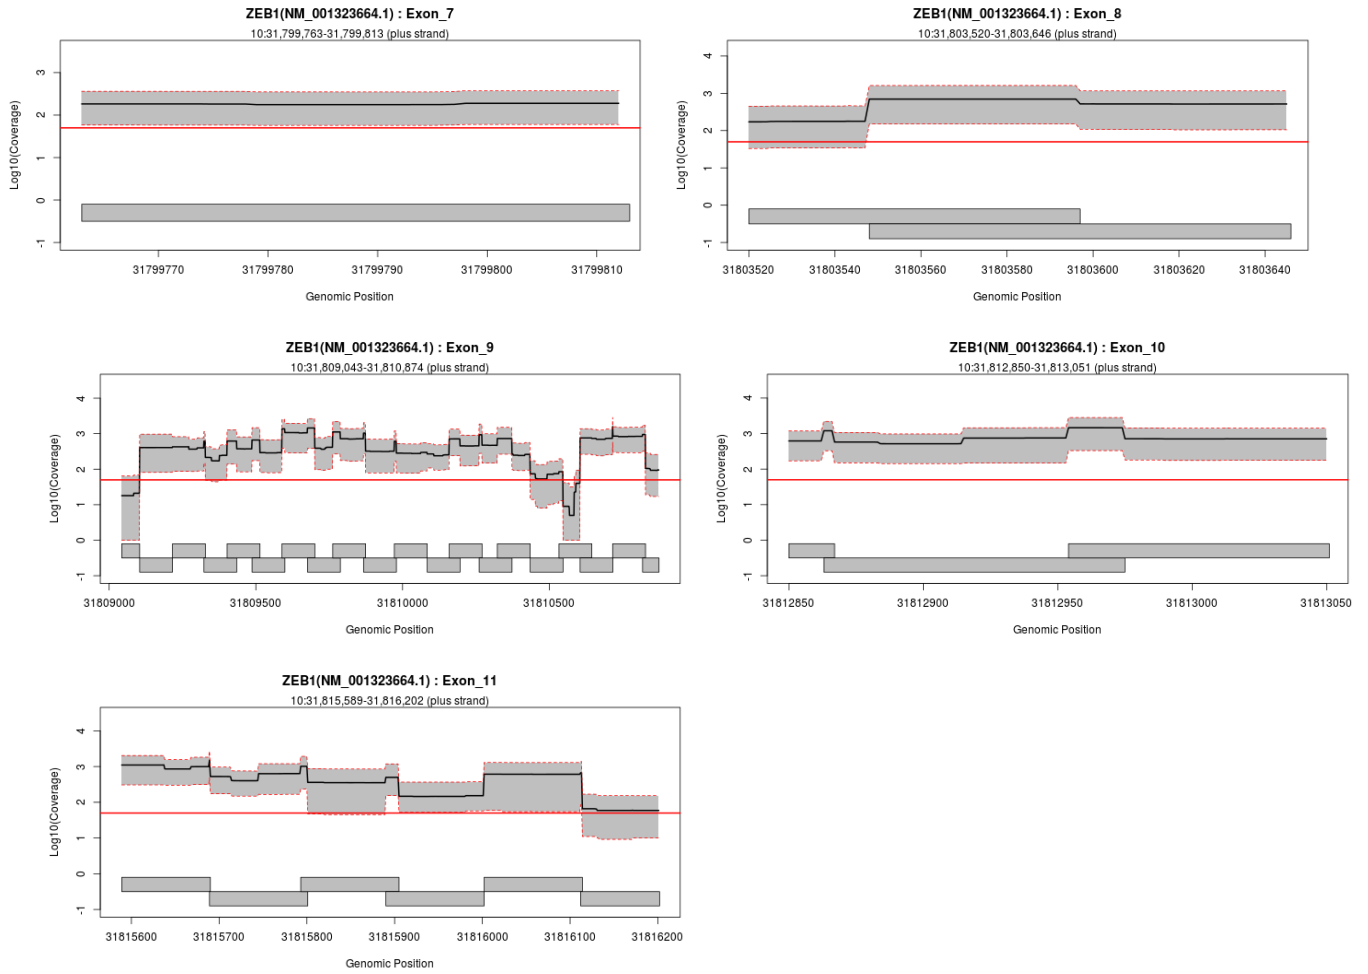

## Exon Overview: ZEB1 : NM\_001323665.1

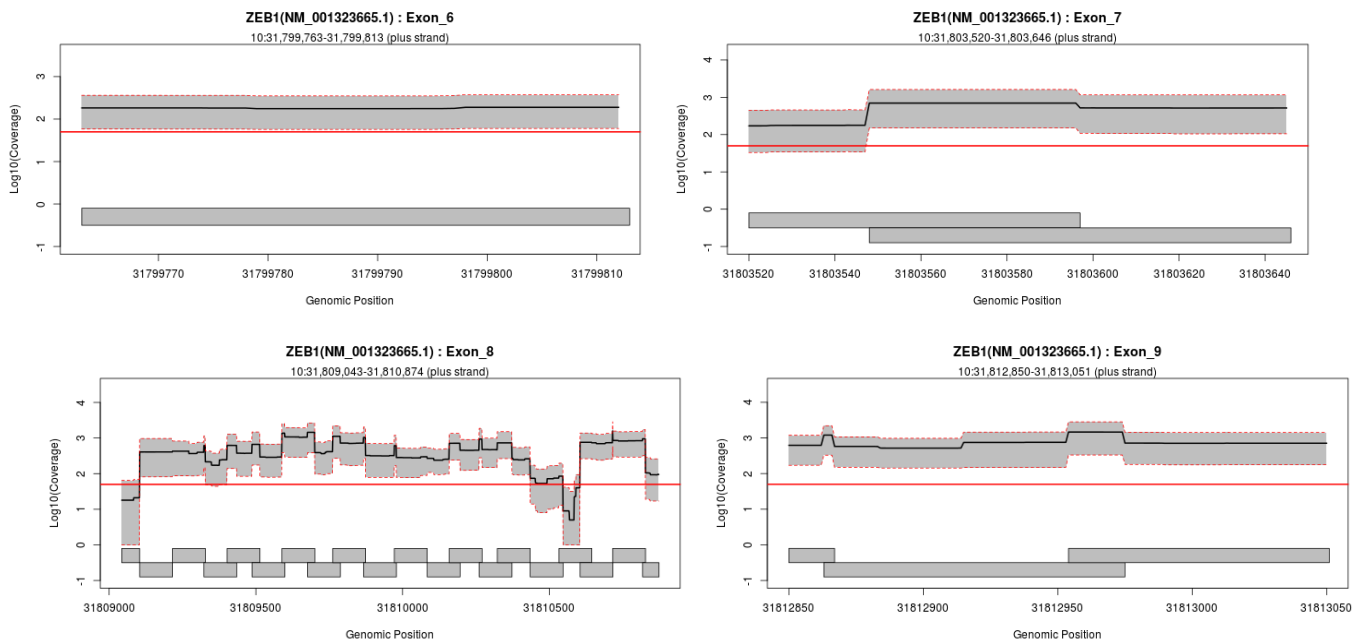

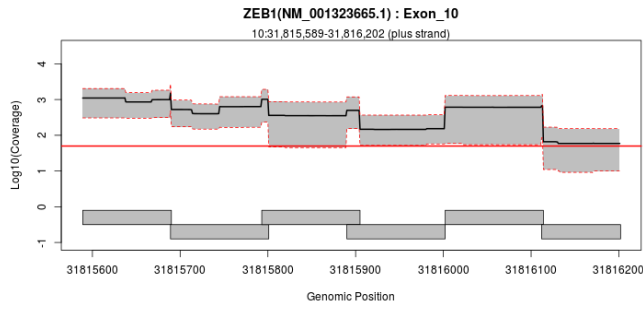

## Exon Overview: ZEB1 : NM\_001323666.1

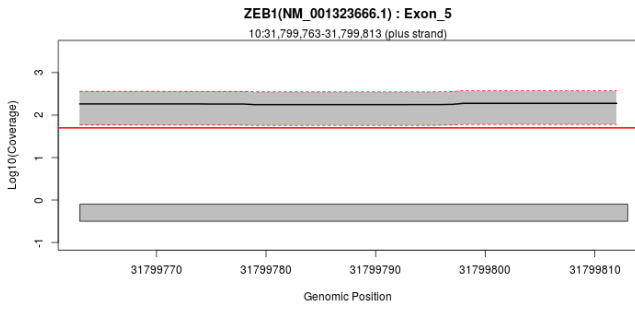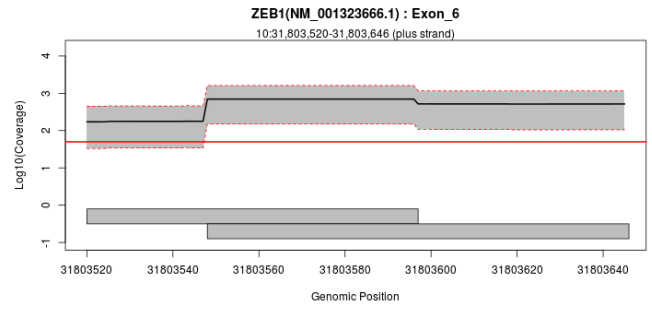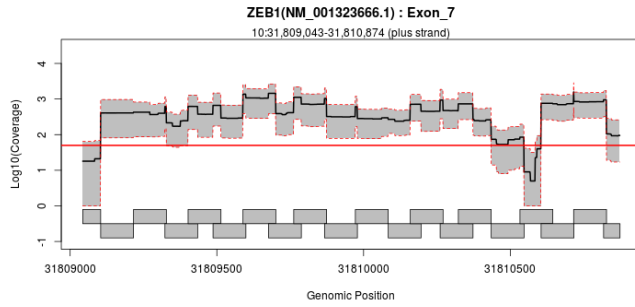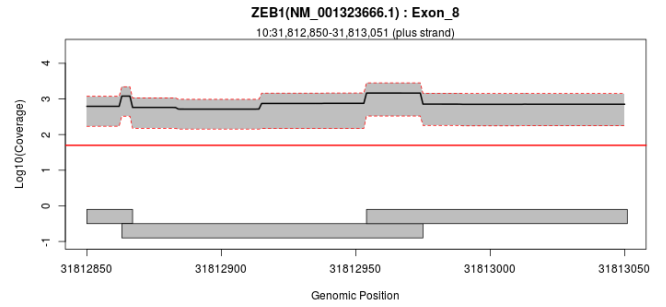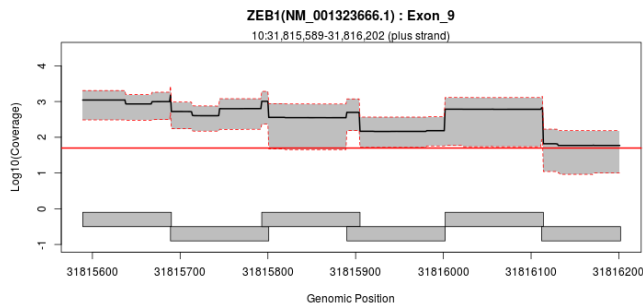

## Exon Overview: ZEB1 : NM\_001323671.1

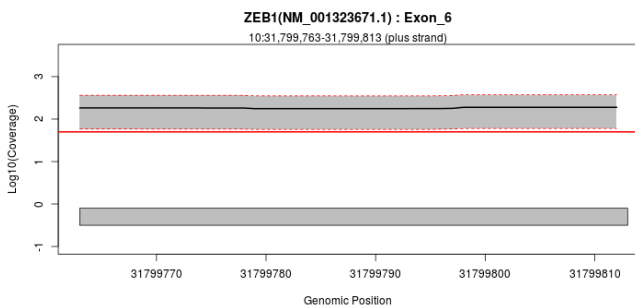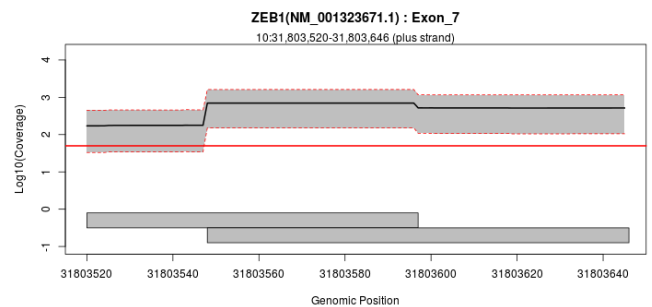

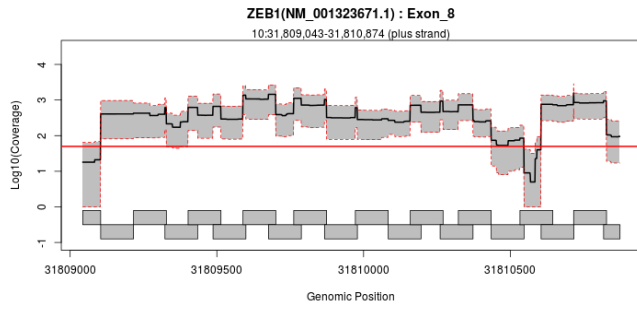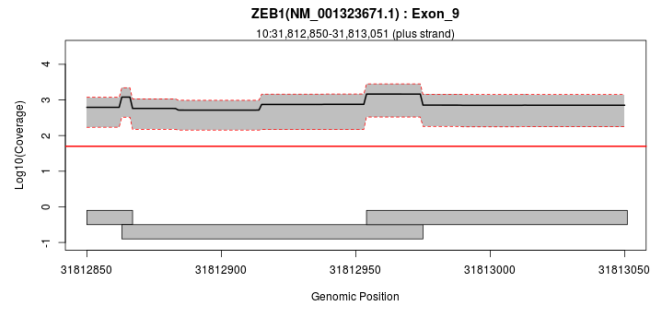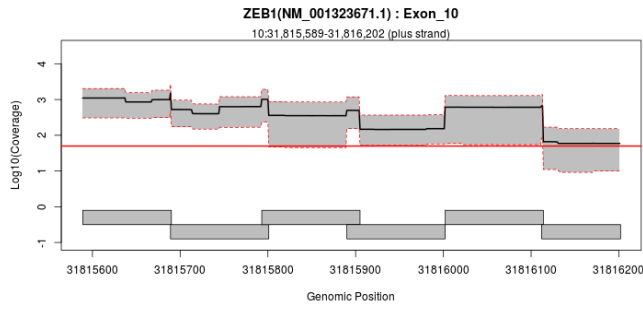

### Exon Overview: ZEB1 : NM\_001323672.1

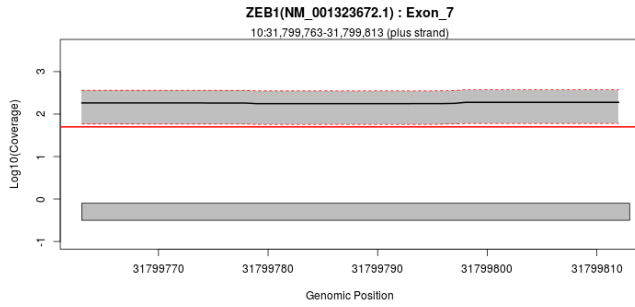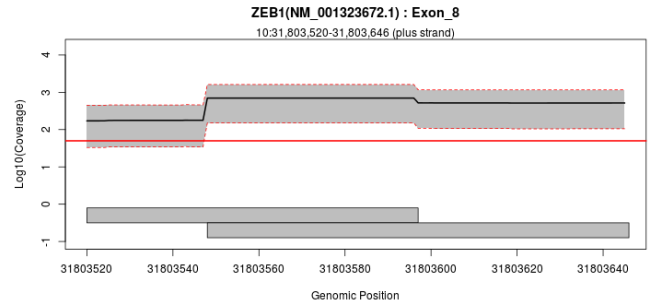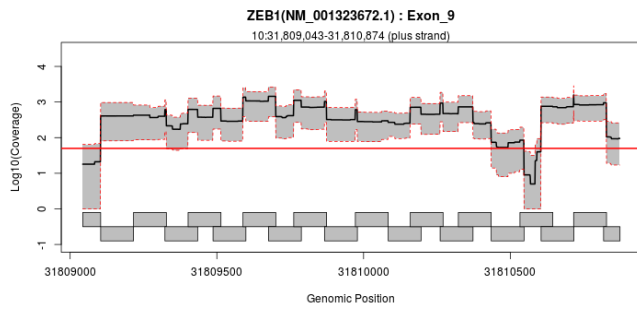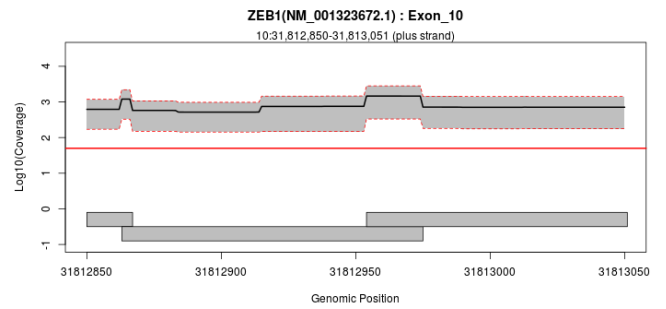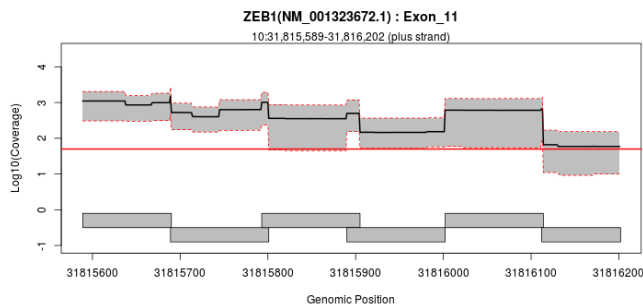

## Exon Overview: ZEB1 : NM\_001323673.1

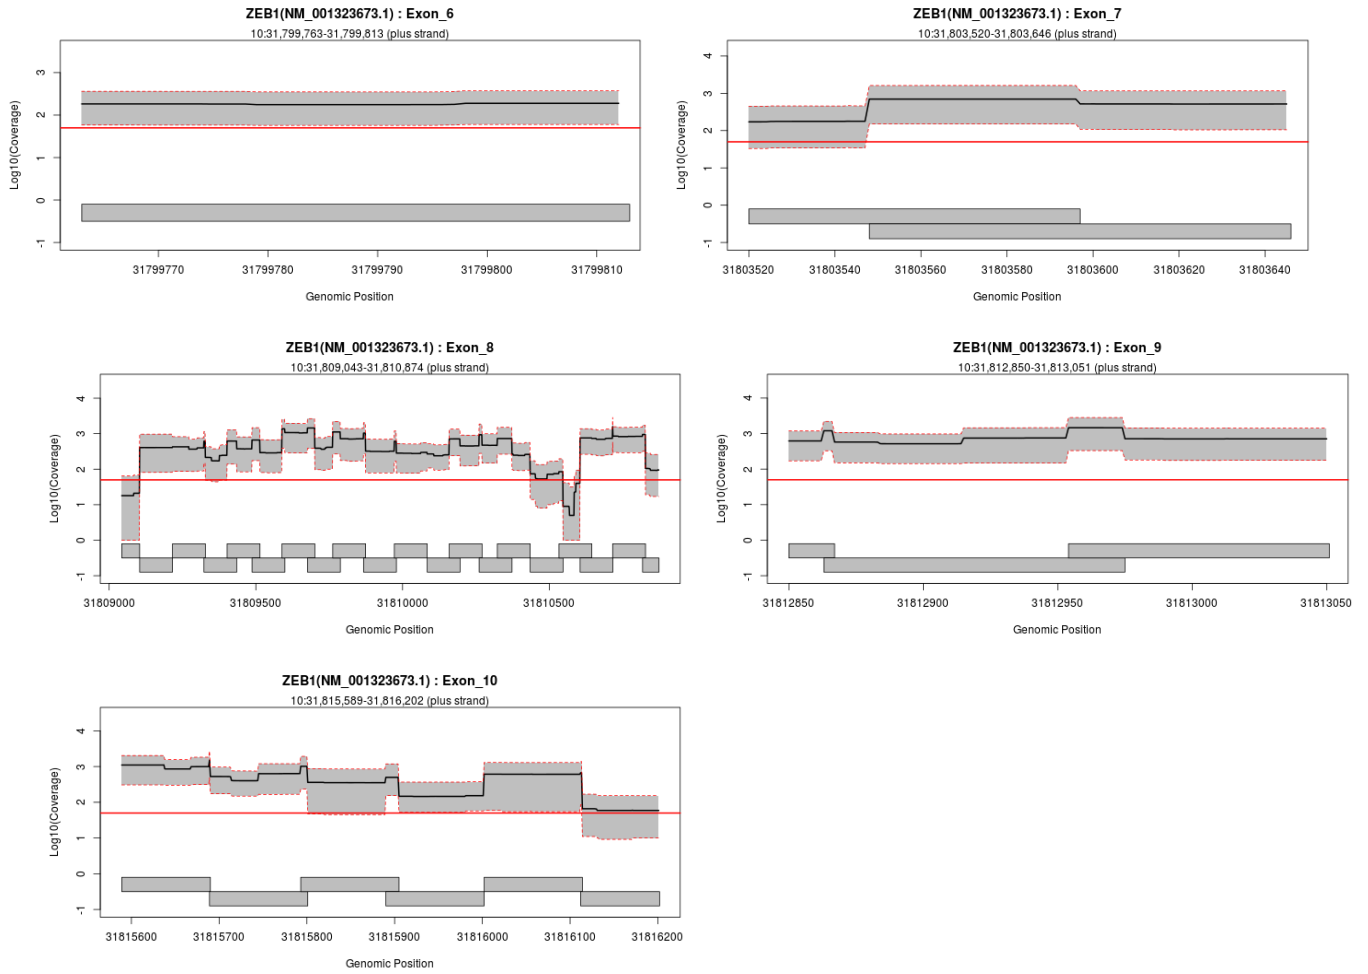

## Exon Overview: ZEB1 : NM\_001323674.1

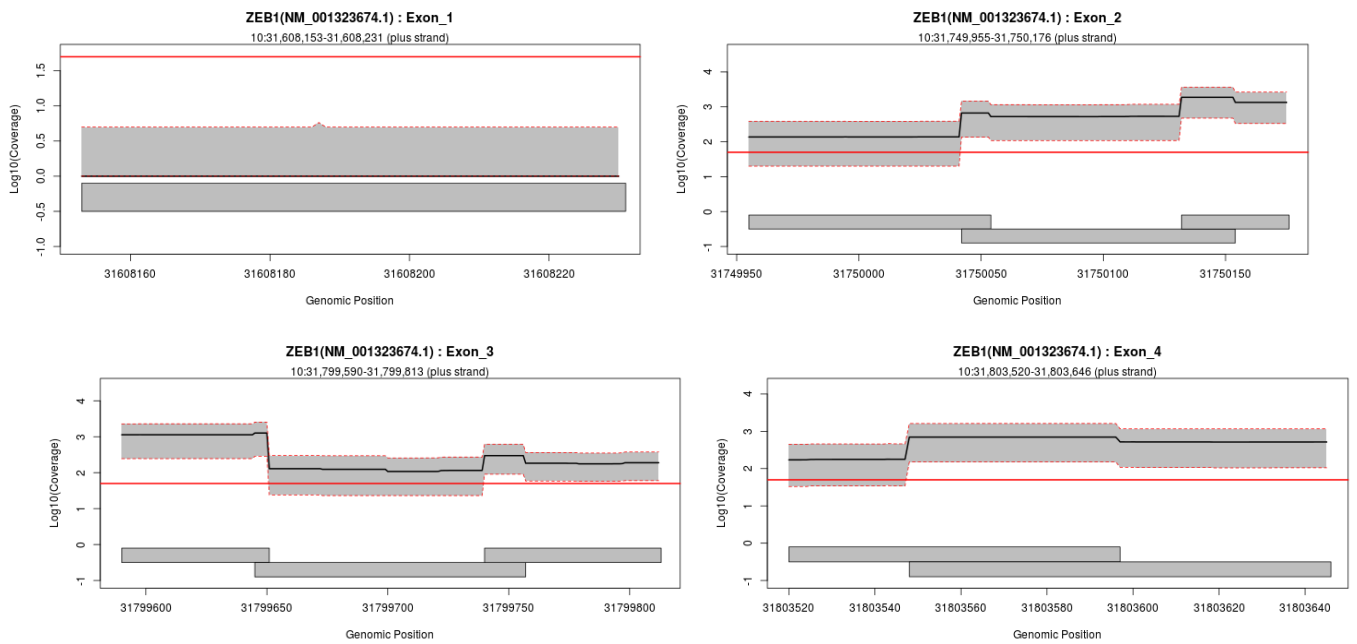

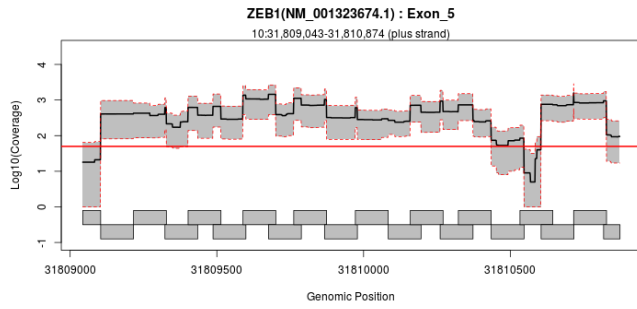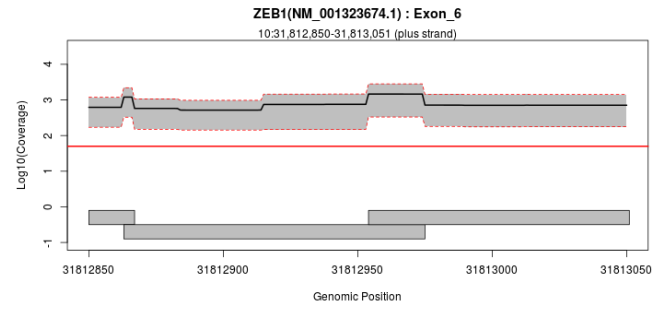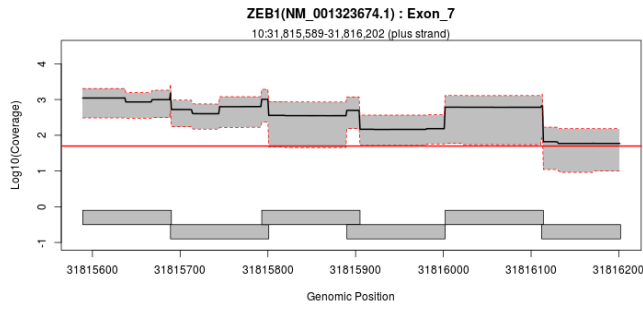

## Exon Overview: ZEB1 : NM\_001323675.1

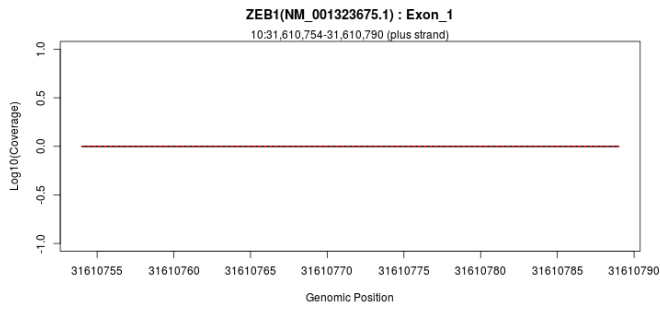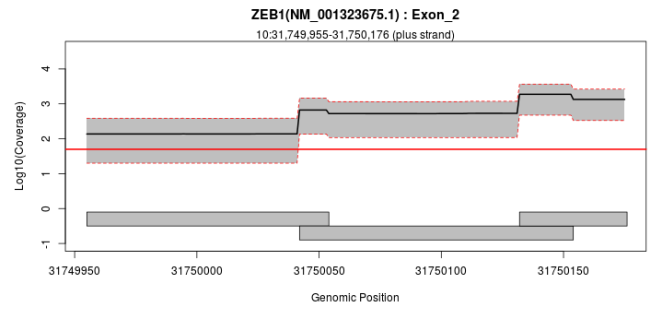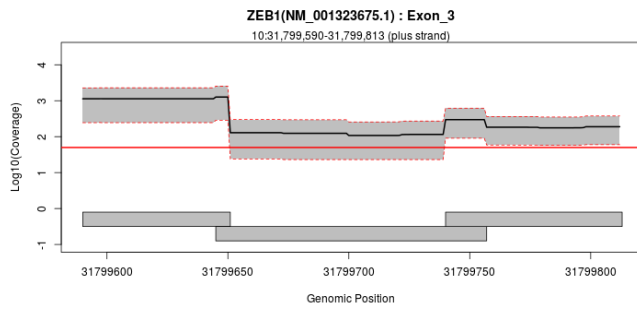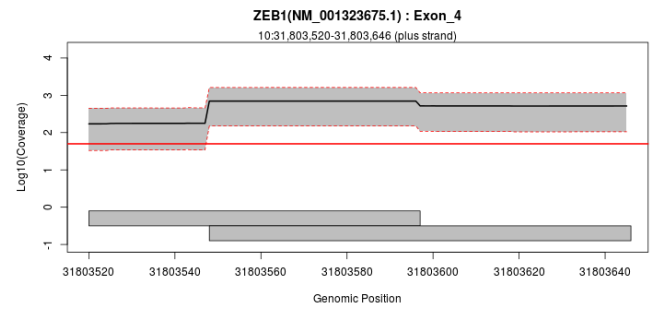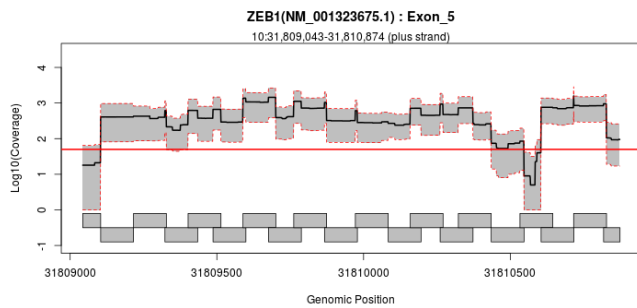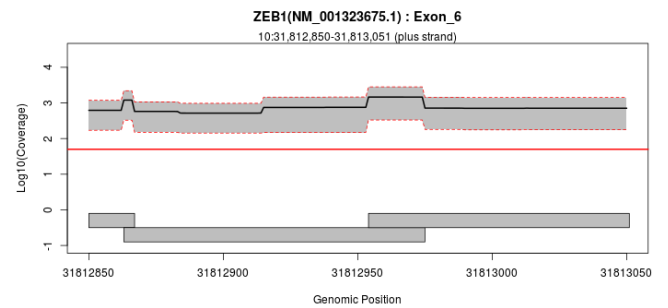

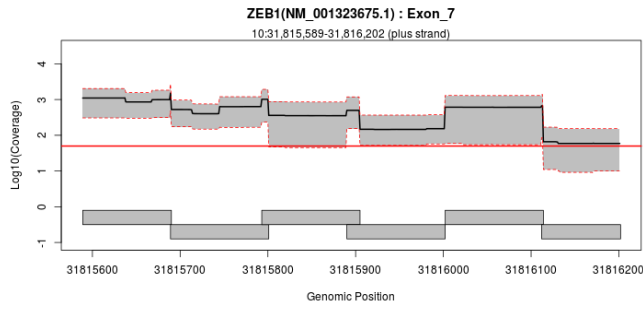

**Exon Overview: ZEB1 : NM\_001323676.1**

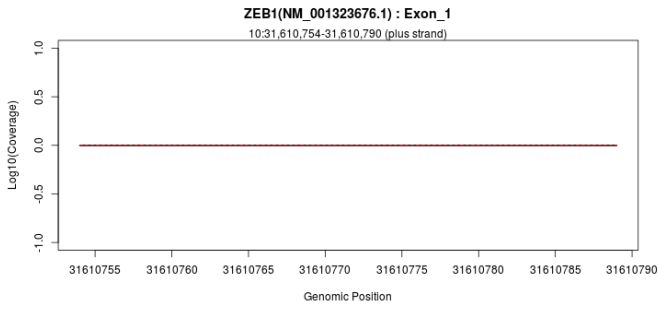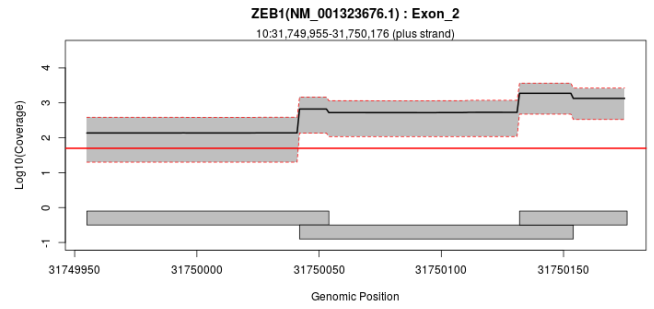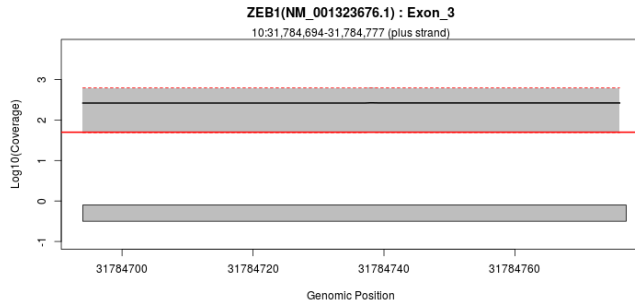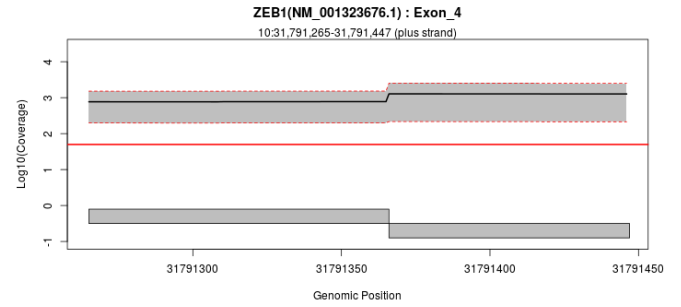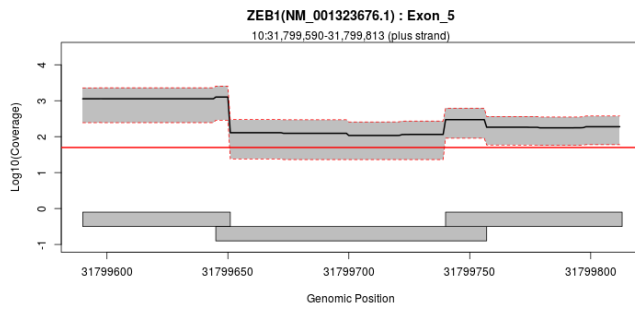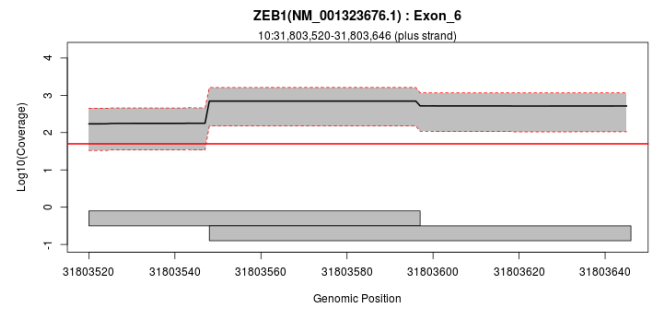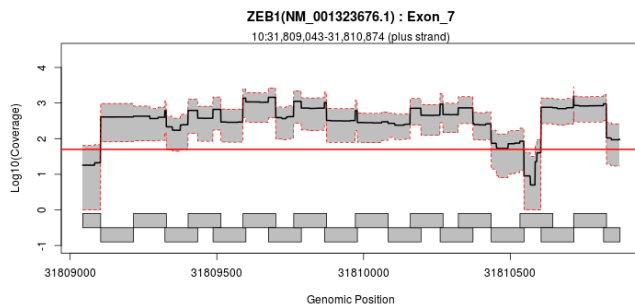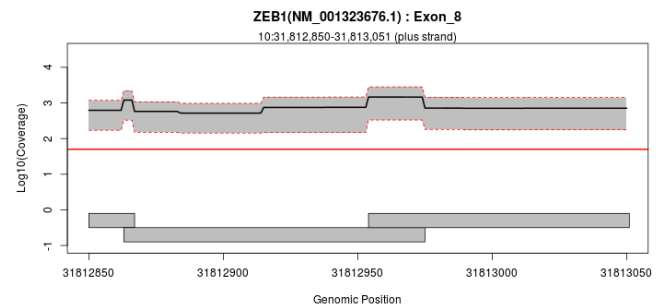



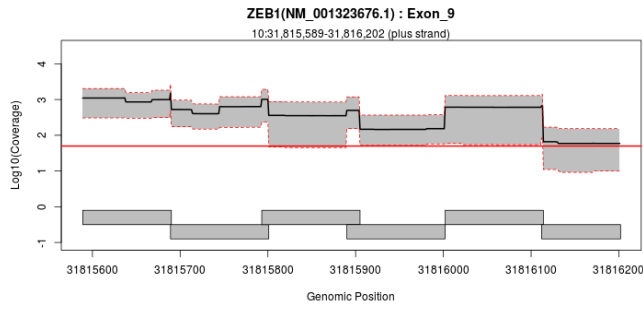

**Exon Overview: ZEB1 : NM\_001323677.1**

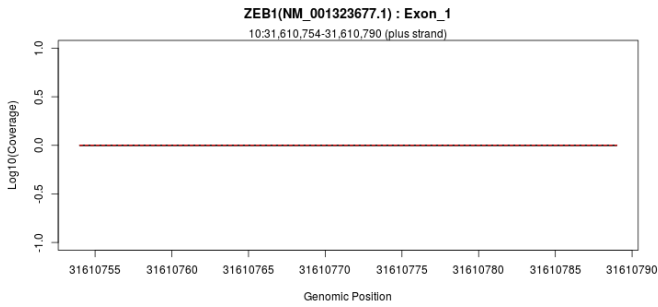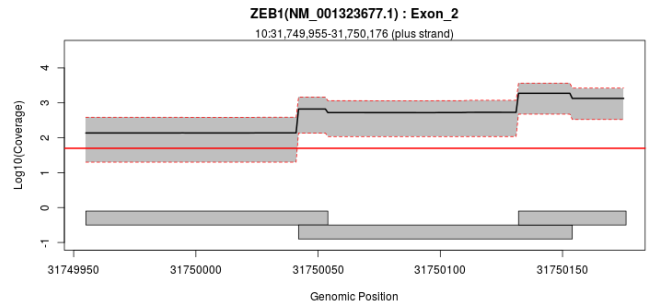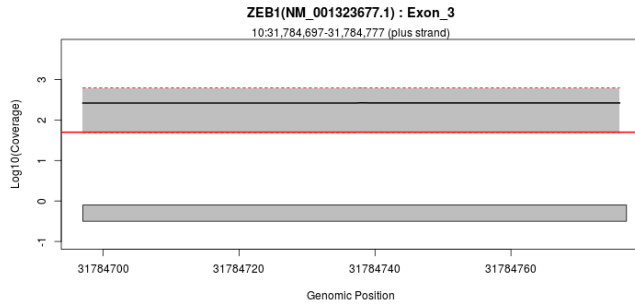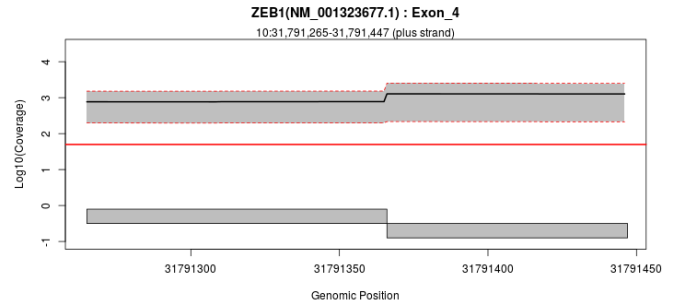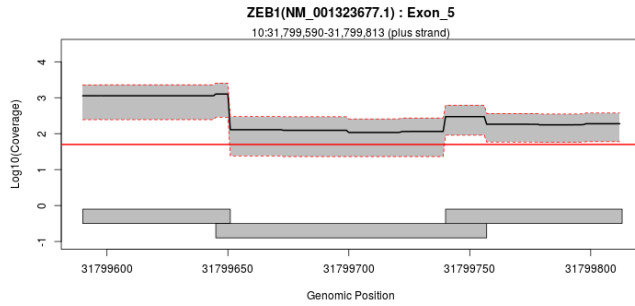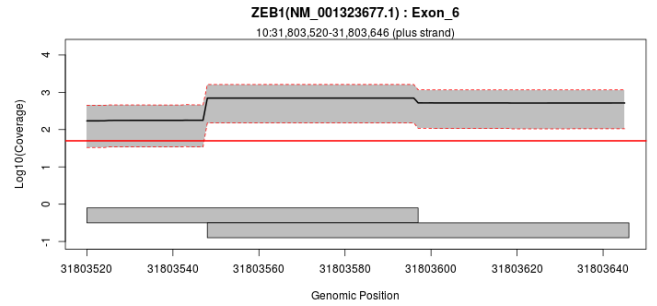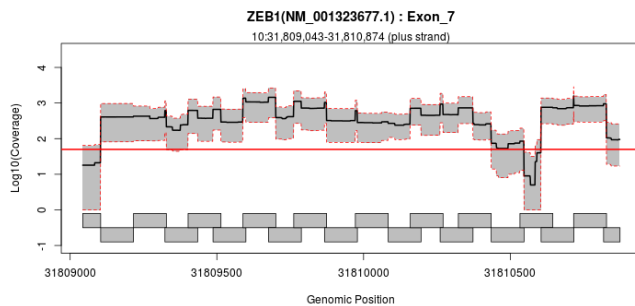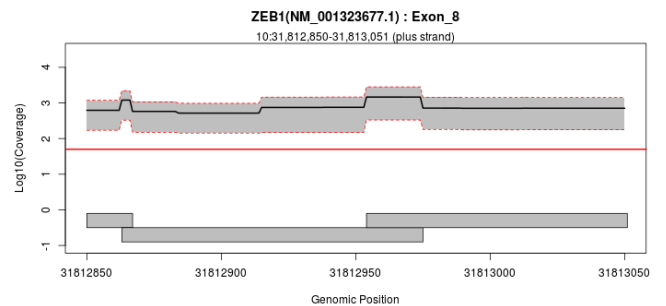

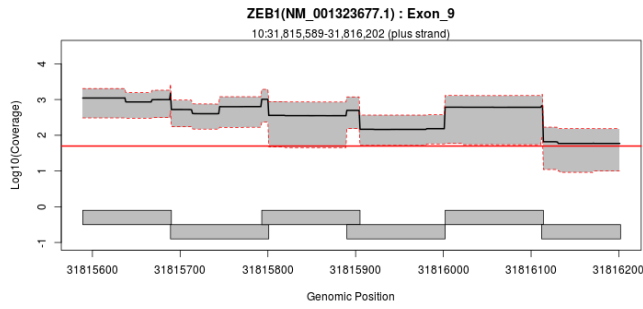

**Exon Overview: ZEB1 : NM\_001323678.1**

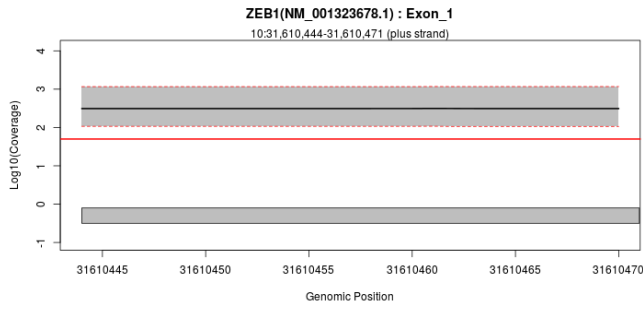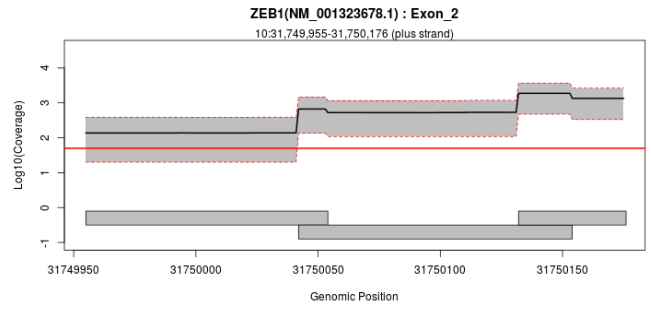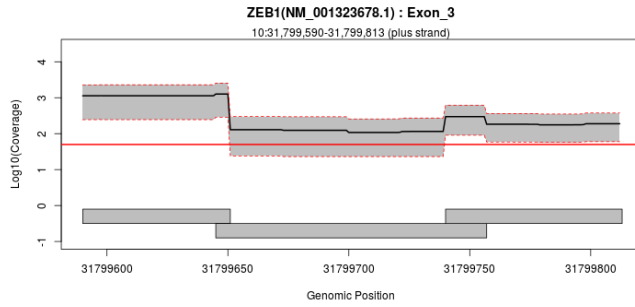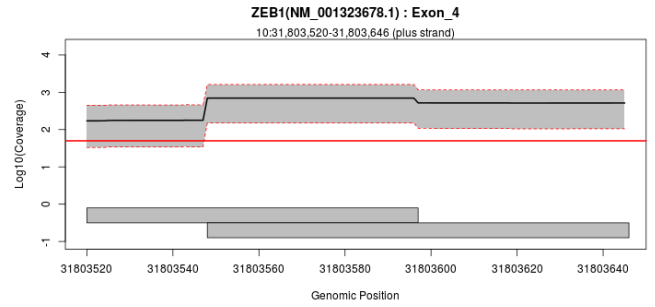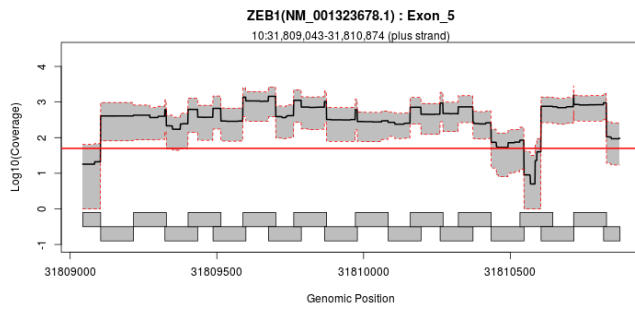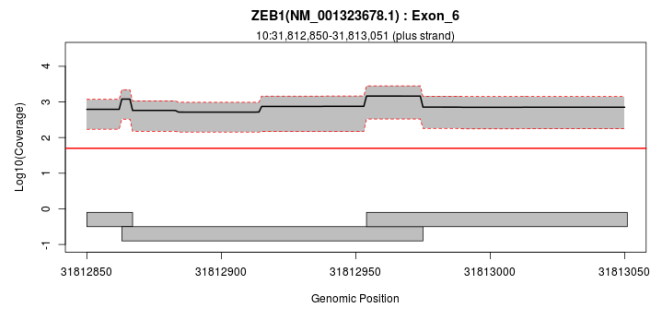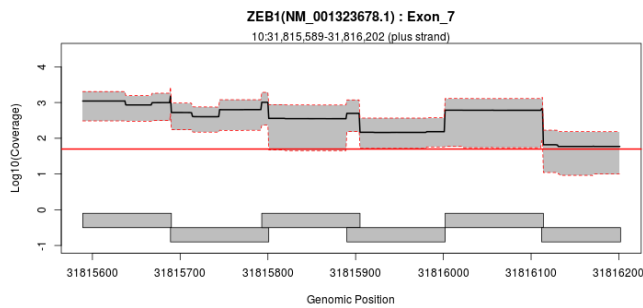

# Exon Overview: ZEB1 : NM\_030751.5

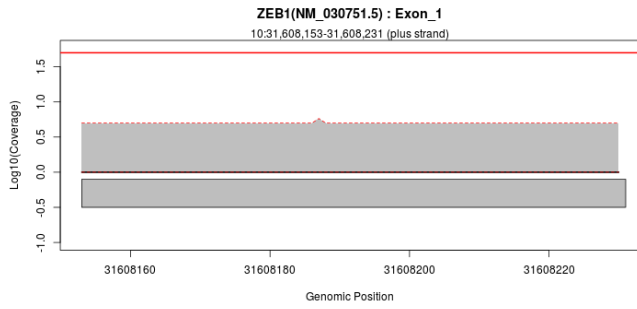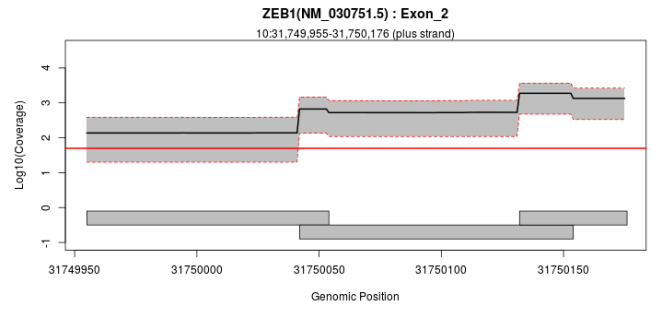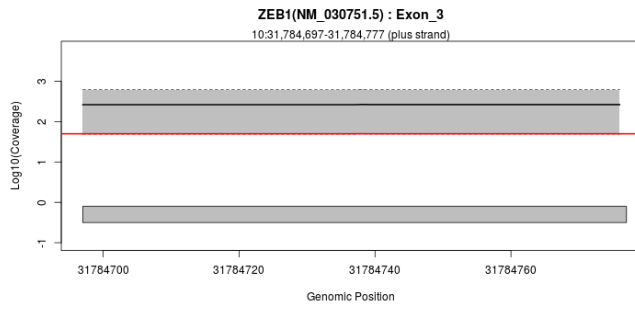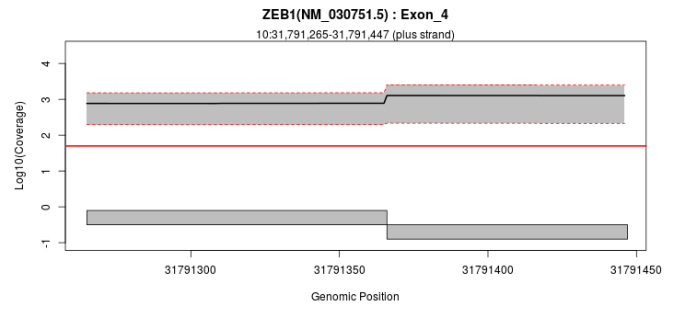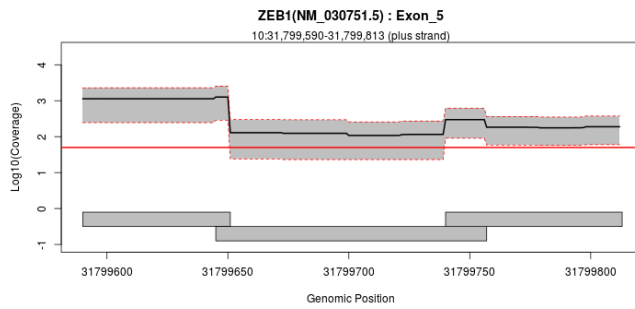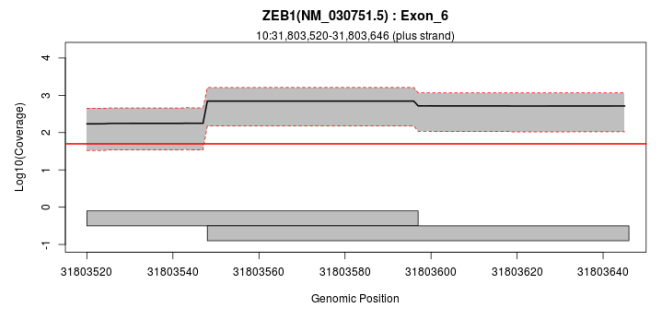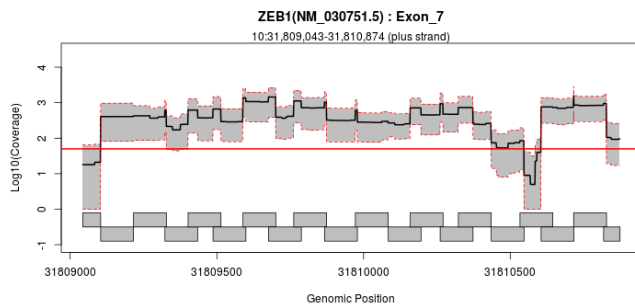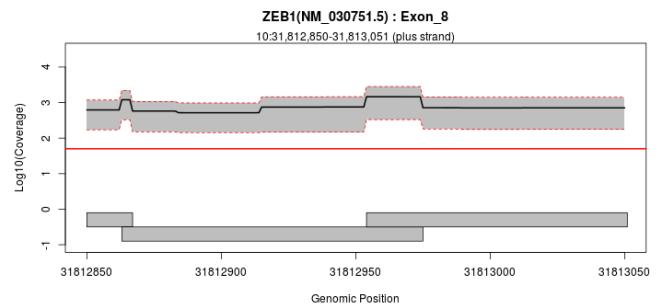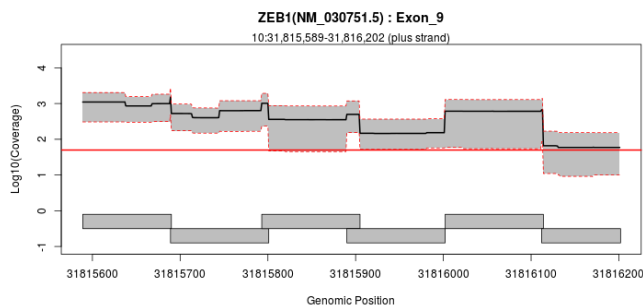

# Exon Overview: ZNF469 : NM\_001127464

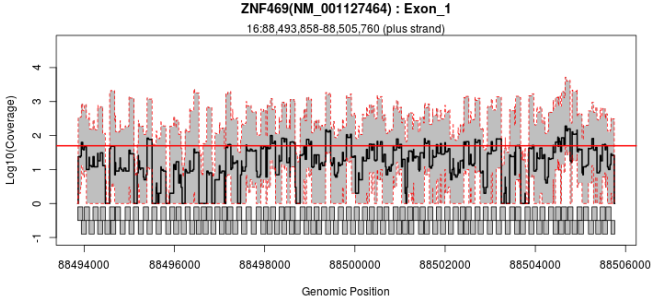

## Regions Failing minimal coverage criteria

Criteria are defined as a minimal coverage of 50X in at least 20% of samples (equals to 313).

| Gene(Transcript) Exon          | Region                     | Size (bp) | Avg.Coverage | Avg.%Samples.Failing |
|--------------------------------|----------------------------|-----------|--------------|----------------------|
| COL12A1(NM_004370.5) Exon_12   | 6:75,887,478-75,887,529    | 52        | 1.53         | 25.68                |
| COL12A1(NM_004370.5) Exon_16   | 6:75,865,510-75,865,580    | 71        | 5.54         | 83.18                |
| COL12A1(NM_004370.5) Exon_2    | 6:75,912,516-75,912,516    | 1         | 3.86         | 20.66                |
| COL12A1(NM_004370.5) Exon_27   | 6:75,851,884-75,851,887    | 4         | 0            | 100                  |
| COL12A1(NM_004370.5) Exon_3    | 6:75,904,600-75,904,639    | 40        | 13.79        | 82.89                |
| COL12A1(NM_004370.5) Exon_30   | 6:75,848,026-75,848,066    | 41        | 4.87         | 92.62                |
| COL12A1(NM_004370.5) Exon_46   | 6:75,828,749-75,828,769    | 21        | 3.23         | 94.04                |
| COL12A1(NM_004370.5) Exon_50   | 6:75,823,308-75,823,391    | 84        | 0.98         | 34.56                |
| COL12A1(NM_004370.5) Exon_51   | 6:75,822,910-75,822,996    | 87        | 5.58         | 49.54                |
| COL12A1(NM_004370.5) Exon_52   | 6:75,818,856-75,818,893    | 38        | 16.6         | 83.62                |
| COL12A1(NM_004370.5) Exon_55   | 6:75,813,463-75,813,536    | 74        | 1.45         | 23.4                 |
| COL12A1(NM_004370.5) Exon_58   | 6:75,811,306-75,811,379    | 74        | 1.81         | 21.24                |
| COL12A1(NM_004370.5) Exon_66   | 6:75,796,253-75,796,283    | 31        | 8.88         | 84.61                |
| COL12A1(NM_080645.2) Exon_12   | 6:75,851,884-75,851,887    | 4         | 0            | 100                  |
| COL12A1(NM_080645.2) Exon_15   | 6:75,848,026-75,848,066    | 41        | 4.87         | 92.62                |
| COL12A1(NM_080645.2) Exon_2    | 6:75,912,516-75,912,516    | 1         | 3.86         | 20.66                |
| COL12A1(NM_080645.2) Exon_31   | 6:75,828,749-75,828,769    | 21        | 3.23         | 94.04                |
| COL12A1(NM_080645.2) Exon_35   | 6:75,823,308-75,823,391    | 84        | 0.98         | 34.56                |
| COL12A1(NM_080645.2) Exon_36   | 6:75,822,910-75,822,996    | 87        | 5.58         | 49.54                |
| COL12A1(NM_080645.2) Exon_37   | 6:75,818,856-75,818,893    | 38        | 16.6         | 83.62                |
| COL12A1(NM_080645.2) Exon_40   | 6:75,813,463-75,813,536    | 74        | 1.45         | 23.4                 |
| COL12A1(NM_080645.2) Exon_43   | 6:75,811,306-75,811,379    | 74        | 1.81         | 21.24                |
| COL12A1(NM_080645.2) Exon_51   | 6:75,796,253-75,796,283    | 31        | 8.88         | 84.61                |
| COL2A1(NM_001844.4) Exon_14    | 12:48,387,582-48,387,588   | 7         | 5.57         | 91.65                |
| COL2A1(NM_001844.4) Exon_37    | 12:48,375,116-48,375,189   | 74        | 1.17         | 32.44                |
| COL2A1(NM_001844.4) Exon_41    | 12:48,373,357-48,373,357   | 1         | 0.57         | 42.35                |
| COL2A1(NM_001844.4) Exon_42    | 12:48,372,496-48,372,533   | 38        | 1.64         | 22.32                |
| COL2A1(NM_001844.4) Exon_48    | 12:48,370,588-48,370,624   | 37        | 3.58         | 20.45                |
| COL2A1(NM_001844.4) Exon_52    | 12:48,368,631-48,368,655   | 25        | 8.54         | 82.16                |
| COL2A1(NM_001844.4) Exon_7     | 12:48,391,387-48,391,418   | 32        | 4.4          | 88.72                |
| COL2A1(NM_033150.2) Exon_13    | 12:48,387,582-48,387,588   | 7         | 5.57         | 91.65                |
| COL2A1(NM_033150.2) Exon_36    | 12:48,375,116-48,375,189   | 74        | 1.17         | 32.44                |
| COL2A1(NM_033150.2) Exon_40    | 12:48,373,357-48,373,357   | 1         | 0.57         | 42.35                |
| COL2A1(NM_033150.2) Exon_41    | 12:48,372,496-48,372,533   | 38        | 1.64         | 22.32                |
| COL2A1(NM_033150.2) Exon_47    | 12:48,370,588-48,370,624   | 37        | 3.58         | 20.45                |
| COL2A1(NM_033150.2) Exon_51    | 12:48,368,631-48,368,655   | 25        | 8.54         | 82.16                |
| COL2A1(NM_033150.2) Exon_6     | 12:48,391,387-48,391,418   | 32        | 4.4          | 88.72                |
| COL5A1(NM_000093.4) Exon_1     | 9:137,534,024-137,534,152  | 129       | 0.48         | 90.12                |
| COL5A1(NM_000093.4) Exon_23    | 9:137,658,836-137,658,836  | 1         | 1.89         | 100                  |
| COL5A1(NM_000093.4) Exon_43    | 9:137,701,125-137,701,146  | 22        | 7.29         | 94.5                 |
| COL5A1(NM_000093.4) Exon_62    | 9:137,716,664-137,716,711  | 48        | 1.63         | 21.88                |
| COL5A1(NM_001278074.1) Exon_1  | 9:137,534,024-137,534,152  | 129       | 0.48         | 90.12                |
| COL5A1(NM_001278074.1) Exon_23 | 9:137,658,836-137,658,836  | 1         | 1.89         | 100                  |
| COL5A1(NM_001278074.1) Exon_43 | 9:137,701,125-137,701,146  | 22        | 7.29         | 94.5                 |
| COL5A1(NM_001278074.1) Exon_62 | 9:137,716,664-137,716,711  | 48        | 1.63         | 21.88                |
| COL5A3(NM_015719.3) Exon_1     | 19:10,121,045-10,121,071   | 27        | 1.69         | 22.82                |
| COL5A3(NM_015719.3) Exon_11    | 19:10,108,037-10,108,089   | 53        | 3.63         | 89.84                |
| COL5A3(NM_015719.3) Exon_17    | 19:10,104,419-10,104,419   | 1         | 0.47         | 100                  |
| COL5A3(NM_015719.3) Exon_18    | 19:10,104,358-10,104,358   | 1         | 3.06         | 89.48                |
| COL5A3(NM_015719.3) Exon_3     | 19:10,116,462-10,116,499   | 38        | 4.66         | 100                  |
| COL5A3(NM_015719.3) Exon_30    | 19:10,097,058-10,097,098   | 41        | 14.35        | 77.62                |
| COL5A3(NM_015719.3) Exon_36    | 19:10,090,660-10,090,733   | 74        | 10.9         | 81.37                |
| COL5A3(NM_015719.3) Exon_41    | 19:10,089,240-10,089,241   | 2         | 15.16        | 81.09                |
| COL5A3(NM_015719.3) Exon_51    | 19:10,083,585-10,083,589   | 5         | 13.06        | 41.73                |
| COL5A3(NM_015719.3) Exon_67    | 19:10,071,116-10,071,149   | 34        | 5.94         | 100                  |
| COL5A3(NM_015719.3) Exon_67    | 19:10,071,153-10,071,182   | 30        | 3.47         | 20.61                |
| DOCK1(NM_001290223.1) Exon_12  | 10:128,810,486-128,810,548 | 63        | 0            | 100                  |
| DOCK1(NM_001290223.1) Exon_14  | 10:128,821,454-128,821,529 | 76        | 8.07         | 85.61                |
| DOCK1(NM_001290223.1) Exon_17  | 10:128,829,904-128,829,958 | 55        | 3.77         | 93.57                |
| DOCK1(NM_001290223.1) Exon_21  | 10:128,841,429-128,841,438 | 10        | 3.05         | 90.07                |
| DOCK1(NM_001290223.1) Exon_36  | 10:129,178,336-129,178,393 | 58        | 12.45        | 83.01                |
| DOCK1(NM_001290223.1) Exon_36  | 10:129,178,395-129,178,396 | 2         | 2.89         | 100                  |
| DOCK1(NM_001380.4) Exon_14     | 10:128,821,454-128,821,529 | 76        | 8.07         | 85.61                |
| DOCK1(NM_001380.4) Exon_17     | 10:128,829,904-128,829,958 | 55        | 3.77         | 93.57                |
| DOCK1(NM_001380.4) Exon_21     | 10:128,841,429-128,841,438 | 10        | 3.05         | 90.07                |
| DOCK1(NM_001380.4) Exon_36     | 10:129,178,336-129,178,393 | 58        | 12.45        | 83.01                |
| DOCK1(NM_001380.4) Exon_36     | 10:129,178,395-129,178,396 | 2         | 2.89         | 100                  |
| DOCK9(NM_001130048.1) Exon_19  | 13:99,538,776-99,538,824   | 49        | 11.41        | 83.69                |
| DOCK9(NM_001130048.1) Exon_28  | 13:99,520,570-99,520,590   | 21        | 12.7         | 84.23                |
| DOCK9(NM_001130048.1) Exon_30  | 13:99,519,737-99,519,769   | 33        | 13.76        | 82.53                |
| DOCK9(NM_001130048.1) Exon_31  | 13:99,515,775-99,515,812   | 38        | 0.25         | 100                  |
| DOCK9(NM_001130048.1) Exon_49  | 13:99,461,367-99,461,392   | 26        | 0            | 100                  |
| DOCK9(NM_001130048.1) Exon_50  | 13:99,460,884-99,460,939   | 56        | 16.53        | 85.57                |
| DOCK9(NM_001130049.1) Exon_1   | 13:99,738,467-99,738,485   | 19        | 1.5          | 24.96                |
| DOCK9(NM_001130049.1) Exon_1   | 13:99,738,506-99,738,507   | 2         | 1.5          | 25.16                |
| DOCK9(NM_001130049.1) Exon_19  | 13:99,538,776-99,538,824   | 49        | 11.41        | 83.69                |
| DOCK9(NM_001130049.1) Exon_28  | 13:99,520,570-99,520,590   | 21        | 12.7         | 84.23                |
| DOCK9(NM_001130049.1) Exon_30  | 13:99,519,737-99,519,769   | 33        | 13.76        | 82.53                |
| DOCK9(NM_001130049.1) Exon_31  | 13:99,515,775-99,515,812   | 38        | 0.25         | 100                  |
| DOCK9(NM_001130049.1) Exon_33  | 13:99,512,584-99,512,584   | 1         | 2.46         | 100                  |
| DOCK9(NM_001130050.1) Exon_19  | 13:99,538,776-99,538,824   | 49        | 11.41        | 83.69                |
| DOCK9(NM_001130050.1) Exon_28  | 13:99,520,570-99,520,590   | 21        | 12.7         | 84.23                |
| DOCK9(NM_001130050.1) Exon_30  | 13:99,519,737-99,519,769   | 33        | 13.76        | 82.53                |
| DOCK9(NM_001130050.1) Exon_31  | 13:99,515,775-99,515,812   | 38        | 0.25         | 100                  |

Continued on next page

| Gene(Transcript) Exon          | Region                    | Size (bp) | Avg.Coverage | Avg.%.Samples.Failing |
|--------------------------------|---------------------------|-----------|--------------|-----------------------|
| DOCK9(NM_001318849.1) Exon_33  | 13:99,512,584-99,512,584  | 1         | 2.46         | 100                   |
| DOCK9(NM_001318849.1) Exon_1   | 13:99,738,467-99,738,485  | 19        | 1.5          | 24.96                 |
| DOCK9(NM_001318849.1) Exon_1   | 13:99,738,506-99,738,507  | 2         | 1.5          | 25.16                 |
| DOCK9(NM_001318849.1) Exon_19  | 13:99,538,776-99,538,824  | 49        | 11.41        | 83.69                 |
| DOCK9(NM_001318849.1) Exon_28  | 13:99,520,570-99,520,590  | 21        | 12.7         | 84.23                 |
| DOCK9(NM_001318849.1) Exon_30  | 13:99,519,737-99,519,769  | 33        | 13.76        | 82.53                 |
| DOCK9(NM_001318849.1) Exon_31  | 13:99,515,775-99,515,812  | 38        | 0.25         | 100                   |
| DOCK9(NM_001318849.1) Exon_48  | 13:99,461,367-99,461,392  | 26        | 0            | 100                   |
| DOCK9(NM_001318849.1) Exon_49  | 13:99,460,884-99,460,939  | 56        | 16.53        | 85.57                 |
| DOCK9(NM_015296.2) Exon_1      | 13:99,738,467-99,738,485  | 19        | 1.5          | 24.96                 |
| DOCK9(NM_015296.2) Exon_1      | 13:99,738,506-99,738,507  | 2         | 1.5          | 25.16                 |
| DOCK9(NM_015296.2) Exon_19     | 13:99,538,776-99,538,824  | 49        | 11.41        | 83.69                 |
| DOCK9(NM_015296.2) Exon_28     | 13:99,520,570-99,520,590  | 21        | 12.7         | 84.23                 |
| DOCK9(NM_015296.2) Exon_30     | 13:99,519,737-99,519,769  | 33        | 13.76        | 82.53                 |
| DOCK9(NM_015296.2) Exon_31     | 13:99,515,775-99,515,812  | 38        | 0.25         | 100                   |
| DOCK9(NM_015296.2) Exon_49     | 13:99,461,367-99,461,392  | 26        | 0            | 100                   |
| DOCK9(NM_015296.2) Exon_50     | 13:99,460,884-99,460,939  | 56        | 16.53        | 85.57                 |
| EPPK1(NM_031308.3) Exon_2      | 8:144,940,611-144,940,670 | 60        | 0.9          | 30.65                 |
| EPPK1(NM_031308.3) Exon_2      | 8:144,941,467-144,941,530 | 64        | 1.33         | 23.81                 |
| EPPK1(NM_031308.3) Exon_2      | 8:144,941,663-144,941,741 | 79        | 0.82         | 33.85                 |
| EPPK1(NM_031308.3) Exon_2      | 8:144,942,402-144,942,431 | 30        | 1.48         | 24.82                 |
| EPPK1(NM_031308.3) Exon_2      | 8:144,943,693-144,943,755 | 63        | 1.09         | 30.77                 |
| EPPK1(NM_031308.3) Exon_2      | 8:144,943,892-144,943,982 | 91        | 4.86         | 86.11                 |
| EPPK1(NM_031308.3) Exon_2      | 8:144,944,403-144,944,494 | 92        | 0.72         | 44.73                 |
| EPPK1(NM_031308.3) Exon_2      | 8:144,944,607-144,944,658 | 52        | 1.36         | 22.82                 |
| EPPK1(NM_031308.3) Exon_2      | 8:144,945,272-144,945,284 | 13        | 1.29         | 24.51                 |
| EPPK1(NM_031308.3) Exon_2      | 8:144,945,705-144,945,735 | 31        | 0.95         | 25.5                  |
| EPPK1(NM_031308.3) Exon_2      | 8:144,946,145-144,946,182 | 38        | 0.56         | 52.48                 |
| EPPK1(NM_031308.3) Exon_2      | 8:144,946,567-144,946,647 | 81        | 1.22         | 31.82                 |
| FOXO1(NM_002015.3) Exon_1      | 13:41,239,882-41,240,212  | 331       | 0.57         | 78.16                 |
| FOXO1(NM_002015.3) Exon_1      | 13:41,240,239-41,240,359  | 121       | 1.04         | 38.03                 |
| HLA-G(NM_002127.5) Exon_3      | 6:29,795,935-29,796,002   | 68        | 8.29         | 90.48                 |
| HLA-G(NM_002127.5) Exon_4      | 6:29,796,505-29,796,552   | 48        | 7.75         | 93.28                 |
| LAMC3(NM_006059.3) Exon_1      | 9:133,884,592-133,884,717 | 126       | 0.67         | 36.38                 |
| LAMC3(NM_006059.3) Exon_1      | 9:133,884,910-133,884,984 | 75        | 1.1          | 28.71                 |
| LAMC3(NM_006059.3) Exon_11     | 9:133,928,227-133,928,284 | 58        | 1.83         | 100                   |
| LAMC3(NM_006059.3) Exon_21     | 9:133,951,208-133,951,208 | 1         | 18.41        | 83.55                 |
| LAMC3(NM_006059.3) Exon_3      | 9:133,907,431-133,907,467 | 37        | 1.62         | 21.82                 |
| LOXHD1(NM_001145472.2) Exon_16 | 18:44,098,082-44,098,105  | 24        | 10.06        | 29.63                 |
| LOXHD1(NM_001145472.2) Exon_16 | 18:44,098,107-44,098,127  | 21        | 10.66        | 20.18                 |
| LOXHD1(NM_001145472.2) Exon_19 | 18:44,085,862-44,085,863  | 2         | 5.98         | 20.7                  |
| LOXHD1(NM_001145472.2) Exon_21 | 18:44,064,972-44,064,987  | 16        | 6.88         | 72.94                 |
| LOXHD1(NM_001145472.2) Exon_21 | 18:44,065,064-44,065,124  | 61        | 4.91         | 24.11                 |
| LOXHD1(NM_001145473.2) Exon_2  | 18:44,098,082-44,098,105  | 24        | 10.06        | 29.63                 |
| LOXHD1(NM_001145473.2) Exon_2  | 18:44,098,107-44,098,127  | 21        | 10.66        | 20.18                 |
| LOXHD1(NM_001145473.2) Exon_5  | 18:44,085,862-44,085,863  | 2         | 5.98         | 20.7                  |
| LOXHD1(NM_001145473.2) Exon_7  | 18:44,064,972-44,064,987  | 16        | 6.88         | 72.94                 |
| LOXHD1(NM_001145473.2) Exon_7  | 18:44,065,064-44,065,124  | 61        | 4.91         | 24.11                 |
| LOXHD1(NM_001173129.1) Exon_2  | 18:44,098,082-44,098,105  | 24        | 10.06        | 29.63                 |
| LOXHD1(NM_001173129.1) Exon_2  | 18:44,098,107-44,098,127  | 21        | 10.66        | 20.18                 |
| LOXHD1(NM_001173129.1) Exon_5  | 18:44,085,862-44,085,863  | 2         | 5.98         | 20.7                  |
| LOXHD1(NM_001173129.1) Exon_7  | 18:44,064,972-44,064,987  | 16        | 6.88         | 72.94                 |
| LOXHD1(NM_001173129.1) Exon_7  | 18:44,065,064-44,065,124  | 61        | 4.91         | 24.11                 |
| LOXHD1(NM_001173129.1) Exon_7  | 18:44,098,082-44,098,105  | 24        | 10.06        | 29.63                 |
| LOXHD1(NM_001173129.1) Exon_7  | 18:44,098,107-44,098,127  | 21        | 10.66        | 20.18                 |
| LOXHD1(NM_001308013.1) Exon_14 | 18:44,098,082-44,098,105  | 24        | 10.06        | 29.63                 |
| LOXHD1(NM_001308013.1) Exon_14 | 18:44,098,107-44,098,127  | 21        | 10.66        | 20.18                 |
| LOXHD1(NM_001308013.1) Exon_17 | 18:44,085,862-44,085,863  | 2         | 5.98         | 20.7                  |
| LOXHD1(NM_001308013.1) Exon_19 | 18:44,064,972-44,064,987  | 16        | 6.88         | 72.94                 |
| LOXHD1(NM_001308013.1) Exon_19 | 18:44,065,064-44,065,124  | 61        | 4.91         | 24.11                 |
| LOXHD1(NM_144612.6) Exon_19    | 18:44,140,036-44,140,087  | 52        | 3.37         | 95.5                  |
| LOXHD1(NM_144612.6) Exon_33    | 18:44,098,082-44,098,105  | 24        | 10.06        | 29.63                 |
| LOXHD1(NM_144612.6) Exon_33    | 18:44,098,107-44,098,127  | 21        | 10.66        | 20.18                 |
| LOXHD1(NM_144612.6) Exon_36    | 18:44,085,862-44,085,863  | 2         | 5.98         | 20.7                  |
| LOXHD1(NM_144612.6) Exon_38    | 18:44,064,972-44,064,987  | 16        | 6.88         | 72.94                 |
| LOXHD1(NM_144612.6) Exon_38    | 18:44,065,064-44,065,124  | 61        | 4.91         | 24.11                 |
| MIR184.nc(NR_029705.1) Exon_1  | 15:79,502,120-79,502,120  | 1         | 0            | 100                   |
| MMP9(NM_004994.2) Exon_2       | 20:44,638,744-44,638,747  | 4         | 2.59         | 89.48                 |
| MMP9(NM_004994.2) Exon_5       | 20:44,639,931-44,639,931  | 1         | 1.81         | 19.96                 |
| MMP9(NM_004994.2) Exon_5       | 20:44,639,933-44,639,961  | 29        | 1.79         | 21.16                 |
| MMP9(NM_004994.2) Exon_7       | 20:44,640,805-44,640,861  | 57        | 1.82         | 22.61                 |
| MMP9(NM_004994.2) Exon_9       | 20:44,641,884-44,641,967  | 84        | 1.19         | 26.78                 |
| MMP9(NM_004994.2) Exon_9       | 20:44,641,992-44,642,092  | 101       | 1.04         | 100                   |
| NLRP1(NM_001033053.2) Exon_16  | 17:5,405,124-5,405,124    | 1         | 2.06         | 100                   |
| NLRP1(NM_001033053.2) Exon_4   | 17:5,462,149-5,462,163    | 15        | 15.34        | 81.86                 |
| NLRP1(NM_001033053.2) Exon_4   | 17:5,462,165-5,462,201    | 37        | 19.56        | 86.52                 |
| NLRP1(NM_014922.4) Exon_4      | 17:5,462,149-5,462,163    | 15        | 15.34        | 81.86                 |
| NLRP1(NM_014922.4) Exon_4      | 17:5,462,165-5,462,201    | 37        | 19.56        | 86.52                 |
| NLRP1(NM_033004.3) Exon_4      | 17:5,462,149-5,462,163    | 15        | 15.34        | 81.86                 |
| NLRP1(NM_033004.3) Exon_4      | 17:5,462,165-5,462,201    | 37        | 19.56        | 86.52                 |
| NLRP1(NM_033006.3) Exon_4      | 17:5,462,149-5,462,163    | 15        | 15.34        | 81.86                 |
| NLRP1(NM_033006.3) Exon_4      | 17:5,462,165-5,462,201    | 37        | 19.56        | 86.52                 |
| NLRP1(NM_033007.3) Exon_4      | 17:5,462,149-5,462,163    | 15        | 15.34        | 81.86                 |
| NLRP1(NM_033007.3) Exon_4      | 17:5,462,165-5,462,201    | 37        | 19.56        | 86.52                 |
| P3H4(NM_006455.2) Exon_1       | 17:39,967,813-39,967,913  | 101       | 0.66         | 41.92                 |
| P3H4(NM_006455.2) Exon_1       | 17:39,967,917-39,968,023  | 107       | 1.14         | 28.67                 |
| P3H4(NM_006455.2) Exon_1       | 17:39,968,026-39,968,076  | 51        | 1.32         | 23.07                 |
| P3H4(NM_006455.2) Exon_3       | 17:39,967,195-39,967,208  | 14        | 1.44         | 24.46                 |
| P3H4(NM_006455.2) Exon_6       | 17:39,963,141-39,963,141  | 1         | 1.52         | 22.9                  |
| PARP1(NM_001618.3) Exon_11     | 1:226,567,352-226,567,352 | 1         | 0.25         | 100                   |
| PARP2(NM_001042618.1) Exon_15  | 14:20,825,545-20,825,622  | 78        | 1.51         | 27.12                 |

Continued on next page

| Gene(Transcript) Exon           | Region                    | Size (bp) | Avg.Coverage | Avg.%Samples.Failing |
|---------------------------------|---------------------------|-----------|--------------|----------------------|
| PARP2(NM_005484.3) Exon_15      | 14:20,825,545-20,825,622  | 78        | 1.51         | 27.12                |
| RDH13(NM_001145971.1) Exon_1    | 19:55,574,400-55,574,406  | 7         | 0.16         | 67.78                |
| SLC4A11(NM_001174089.1) Exon_10 | 20:3,211,569-3,211,611    | 43        | 0.63         | 100                  |
| SLC4A11(NM_001174089.1) Exon_14 | 20:3,210,211-3,210,293    | 83        | 0.97         | 33.81                |
| SLC4A11(NM_001174089.1) Exon_16 | 20:3,209,731-3,209,802    | 72        | 0.74         | 100                  |
| SLC4A11(NM_001174090.1) Exon_1  | 20:3,218,529-3,218,583    | 55        | 0.9          | 25.68                |
| SLC4A11(NM_001174090.1) Exon_10 | 20:3,211,569-3,211,611    | 43        | 0.63         | 100                  |
| SLC4A11(NM_001174090.1) Exon_14 | 20:3,210,211-3,210,293    | 83        | 0.97         | 33.81                |
| SLC4A11(NM_001174090.1) Exon_16 | 20:3,209,731-3,209,802    | 72        | 0.74         | 100                  |
| SLC4A11(NM_032034.3) Exon_13    | 20:3,210,211-3,210,293    | 83        | 0.97         | 33.81                |
| SLC4A11(NM_032034.3) Exon_15    | 20:3,209,731-3,209,802    | 72        | 0.74         | 100                  |
| SLC4A11(NM_032034.3) Exon_9     | 20:3,211,569-3,211,611    | 43        | 0.63         | 100                  |
| SOD1(NM_000454.4) Exon_1        | 21:33,032,130-33,032,164  | 35        | 1.29         | 24                   |
| TF(NM_001063.3) Exon_13         | 3:133,486,863-133,486,905 | 43        | 2.61         | 75.78                |
| TGFBI(NM_000358.2) Exon_14      | 5:135,396,513-135,396,536 | 24        | 0.83         | 37.81                |
| TGFBI(NM_000358.2) Exon_4       | 5:135,382,014-135,382,053 | 40        | 10.71        | 94.74                |
| TNXB(NM_019105.6) Exon_10       | 6:32,049,135-32,049,154   | 20        | 0            | 100                  |
| TNXB(NM_019105.6) Exon_10       | 6:32,049,441-32,049,460   | 20        | 0            | 100                  |
| TNXB(NM_019105.6) Exon_11       | 6:32,046,800-32,046,819   | 20        | 0            | 100                  |
| TNXB(NM_019105.6) Exon_11       | 6:32,047,133-32,047,152   | 20        | 0            | 100                  |
| TNXB(NM_019105.6) Exon_12       | 6:32,041,414-32,041,486   | 73        | 2.14         | 99.94                |
| TNXB(NM_019105.6) Exon_12       | 6:32,041,505-32,041,589   | 85        | 6.52         | 49.22                |
| TNXB(NM_019105.6) Exon_12       | 6:32,041,720-32,041,739   | 20        | 0            | 100                  |
| TNXB(NM_019105.6) Exon_13       | 6:32,039,757-32,039,776   | 20        | 0            | 100                  |
| TNXB(NM_019105.6) Exon_13       | 6:32,039,851-32,039,861   | 11        | 0.7          | 47.58                |
| TNXB(NM_019105.6) Exon_13       | 6:32,040,066-32,040,085   | 20        | 0            | 100                  |
| TNXB(NM_019105.6) Exon_14       | 6:32,037,894-32,037,913   | 20        | 0            | 100                  |
| TNXB(NM_019105.6) Exon_14       | 6:32,038,144-32,038,177   | 34        | 2.13         | 29.79                |
| TNXB(NM_019105.6) Exon_14       | 6:32,038,182-32,038,201   | 20        | 0            | 100                  |
| TNXB(NM_019105.6) Exon_15       | 6:32,037,320-32,037,339   | 20        | 0            | 100                  |
| TNXB(NM_019105.6) Exon_15       | 6:32,037,629-32,037,648   | 20        | 0            | 100                  |
| TNXB(NM_019105.6) Exon_16       | 6:32,036,589-32,036,608   | 20        | 0            | 100                  |
| TNXB(NM_019105.6) Exon_16       | 6:32,036,854-32,036,872   | 19        | 1.37         | 20.69                |
| TNXB(NM_019105.6) Exon_16       | 6:32,036,904-32,036,923   | 20        | 0            | 100                  |
| TNXB(NM_019105.6) Exon_17       | 6:32,036,157-32,036,176   | 20        | 0            | 100                  |
| TNXB(NM_019105.6) Exon_17       | 6:32,036,475-32,036,494   | 20        | 0            | 100                  |
| TNXB(NM_019105.6) Exon_18       | 6:32,035,428-32,035,447   | 20        | 0            | 100                  |
| TNXB(NM_019105.6) Exon_18       | 6:32,035,679-32,035,698   | 20        | 0.84         | 100                  |
| TNXB(NM_019105.6) Exon_18       | 6:32,035,752-32,035,771   | 20        | 0            | 100                  |
| TNXB(NM_019105.6) Exon_19       | 6:32,032,588-32,032,607   | 20        | 0            | 100                  |
| TNXB(NM_019105.6) Exon_19       | 6:32,032,885-32,032,904   | 20        | 0            | 100                  |
| TNXB(NM_019105.6) Exon_2        | 6:32,065,563-32,065,582   | 20        | 0            | 100                  |
| TNXB(NM_019105.6) Exon_2        | 6:32,065,759-32,065,917   | 159       | 3.75         | 74.65                |
| TNXB(NM_019105.6) Exon_2        | 6:32,065,966-32,065,985   | 20        | 0            | 100                  |
| TNXB(NM_019105.6) Exon_20       | 6:32,029,924-32,029,943   | 20        | 0            | 100                  |
| TNXB(NM_019105.6) Exon_20       | 6:32,030,188-32,030,270   | 83        | 3.08         | 86.97                |
| TNXB(NM_019105.6) Exon_21       | 6:32,029,164-32,029,183   | 20        | 0            | 100                  |
| TNXB(NM_019105.6) Exon_21       | 6:32,029,353-32,029,358   | 6         | 0.15         | 100                  |
| TNXB(NM_019105.6) Exon_21       | 6:32,029,435-32,029,437   | 3         | 3.08         | 37.95                |
| TNXB(NM_019105.6) Exon_21       | 6:32,029,488-32,029,507   | 20        | 0            | 100                  |
| TNXB(NM_019105.6) Exon_22       | 6:32,025,825-32,025,844   | 20        | 0            | 100                  |
| TNXB(NM_019105.6) Exon_22       | 6:32,026,158-32,026,177   | 20        | 0            | 100                  |
| TNXB(NM_019105.6) Exon_23       | 6:32,024,353-32,024,372   | 20        | 0            | 100                  |
| TNXB(NM_019105.6) Exon_23       | 6:32,024,671-32,024,690   | 20        | 0            | 100                  |
| TNXB(NM_019105.6) Exon_24       | 6:32,023,618-32,023,637   | 20        | 0            | 100                  |
| TNXB(NM_019105.6) Exon_24       | 6:32,023,942-32,023,961   | 20        | 0            | 100                  |
| TNXB(NM_019105.6) Exon_25       | 6:32,021,155-32,021,174   | 20        | 0            | 100                  |
| TNXB(NM_019105.6) Exon_25       | 6:32,021,473-32,021,492   | 20        | 0            | 100                  |
| TNXB(NM_019105.6) Exon_26       | 6:32,020,437-32,020,456   | 20        | 0            | 100                  |
| TNXB(NM_019105.6) Exon_26       | 6:32,020,761-32,020,780   | 20        | 0            | 100                  |
| TNXB(NM_019105.6) Exon_27       | 6:32,017,765-32,017,784   | 20        | 0            | 100                  |
| TNXB(NM_019105.6) Exon_27       | 6:32,018,089-32,018,108   | 20        | 0            | 100                  |
| TNXB(NM_019105.6) Exon_28       | 6:32,017,037-32,017,056   | 20        | 0            | 100                  |
| TNXB(NM_019105.6) Exon_28       | 6:32,017,355-32,017,374   | 20        | 0            | 100                  |
| TNXB(NM_019105.6) Exon_29       | 6:32,016,130-32,016,149   | 20        | 0            | 100                  |
| TNXB(NM_019105.6) Exon_29       | 6:32,016,418-32,016,437   | 20        | 0            | 100                  |
| TNXB(NM_019105.6) Exon_3        | 6:32,063,378-32,063,397   | 20        | 0            | 100                  |
| TNXB(NM_019105.6) Exon_3        | 6:32,063,468-32,063,499   | 32        | 1.56         | 23.28                |
| TNXB(NM_019105.6) Exon_3        | 6:32,063,636-32,063,640   | 5         | 2.06         | 20                   |
| TNXB(NM_019105.6) Exon_3        | 6:32,063,643-32,063,683   | 41        | 1.72         | 24.33                |
| TNXB(NM_019105.6) Exon_3        | 6:32,064,020-32,064,047   | 28        | 12.08        | 78                   |
| TNXB(NM_019105.6) Exon_3        | 6:32,065,217-32,065,236   | 20        | 0            | 100                  |
| TNXB(NM_019105.6) Exon_30       | 6:32,015,501-32,015,520   | 20        | 0            | 100                  |
| TNXB(NM_019105.6) Exon_30       | 6:32,015,780-32,015,799   | 20        | 0            | 100                  |
| TNXB(NM_019105.6) Exon_31       | 6:32,013,942-32,013,961   | 20        | 0            | 100                  |
| TNXB(NM_019105.6) Exon_31       | 6:32,014,224-32,014,243   | 20        | 0            | 100                  |
| TNXB(NM_019105.6) Exon_32       | 6:32,012,773-32,012,803   | 31        | 0.49         | 100                  |
| TNXB(NM_019105.6) Exon_32       | 6:32,012,990-32,013,019   | 30        | 1.23         | 97.22                |
| TNXB(NM_019105.6) Exon_32       | 6:32,013,080-32,013,113   | 34        | 0.67         | 100                  |
| TNXB(NM_019105.6) Exon_33       | 6:32,012,148-32,012,167   | 20        | 0            | 100                  |
| TNXB(NM_019105.6) Exon_33       | 6:32,012,212-32,012,262   | 51        | 0.13         | 100                  |
| TNXB(NM_019105.6) Exon_33       | 6:32,012,323-32,012,373   | 51        | 0.12         | 100                  |
| TNXB(NM_019105.6) Exon_33       | 6:32,012,433-32,012,473   | 41        | 0.15         | 100                  |
| TNXB(NM_019105.6) Exon_33       | 6:32,012,484-32,012,503   | 20        | 0            | 100                  |
| TNXB(NM_019105.6) Exon_34       | 6:32,011,774-32,011,793   | 20        | 0            | 100                  |
| TNXB(NM_019105.6) Exon_34       | 6:32,011,814-32,011,816   | 3         | 0.36         | 100                  |
| TNXB(NM_019105.6) Exon_34       | 6:32,011,875-32,011,916   | 42        | 0.15         | 82.41                |
| TNXB(NM_019105.6) Exon_35       | 6:32,011,516-32,011,535   | 20        | 0            | 100                  |
| TNXB(NM_019105.6) Exon_35       | 6:32,011,613-32,011,633   | 21        | 0.55         | 44.21                |

Continued on next page

| Gene(Transcript) Exon       | Region                    | Size (bp) | Avg.Coverage | Avg.%Samples.Failing |
|-----------------------------|---------------------------|-----------|--------------|----------------------|
| TNXB(NM_019105.6) Exon_35   | 6:32,011,660-32,011,679   | 20        | 0            | 100                  |
| TNXB(NM_019105.6) Exon_36   | 6:32,011,204-32,011,245   | 42        | 0.02         | 100                  |
| TNXB(NM_019105.6) Exon_36   | 6:32,011,306-32,011,343   | 38        | 0.14         | 100                  |
| TNXB(NM_019105.6) Exon_37   | 6:32,010,942-32,010,961   | 20        | 0            | 100                  |
| TNXB(NM_019105.6) Exon_37   | 6:32,010,968-32,010,984   | 17        | 1.29         | 98.61                |
| TNXB(NM_019105.6) Exon_37   | 6:32,011,045-32,011,048   | 4         | 1.29         | 94.66                |
| TNXB(NM_019105.6) Exon_37   | 6:32,011,086-32,011,105   | 20        | 0            | 100                  |
| TNXB(NM_019105.6) Exon_38   | 6:32,010,718-32,010,836   | 119       | 0.11         | 78.31                |
| TNXB(NM_019105.6) Exon_38   | 6:32,010,849-32,010,868   | 20        | 0            | 100                  |
| TNXB(NM_019105.6) Exon_39   | 6:32,010,466-32,010,485   | 20        | 0            | 100                  |
| TNXB(NM_019105.6) Exon_39   | 6:32,010,510-32,010,553   | 44        | 2.04         | 93.09                |
| TNXB(NM_019105.6) Exon_39   | 6:32,010,599-32,010,618   | 20        | 0            | 100                  |
| TNXB(NM_019105.6) Exon_4    | 6:32,062,843-32,062,862   | 20        | 0            | 100                  |
| TNXB(NM_019105.6) Exon_4    | 6:32,062,959-32,062,978   | 20        | 0            | 100                  |
| TNXB(NM_019105.6) Exon_40   | 6:32,010,222-32,010,241   | 20        | 0            | 100                  |
| TNXB(NM_019105.6) Exon_40   | 6:32,010,374-32,010,393   | 20        | 0            | 100                  |
| TNXB(NM_019105.6) Exon_41   | 6:32,010,033-32,010,102   | 70        | 0.1          | 99.96                |
| TNXB(NM_019105.6) Exon_41   | 6:32,010,130-32,010,149   | 20        | 0            | 100                  |
| TNXB(NM_019105.6) Exon_42   | 6:32,009,779-32,009,798   | 20        | 0            | 100                  |
| TNXB(NM_019105.6) Exon_42   | 6:32,009,846-32,009,888   | 43        | 0.32         | 99.02                |
| TNXB(NM_019105.6) Exon_42   | 6:32,009,941-32,009,960   | 20        | 0            | 100                  |
| TNXB(NM_019105.6) Exon_43   | 6:32,009,538-32,009,557   | 20        | 0            | 100                  |
| TNXB(NM_019105.6) Exon_43   | 6:32,009,588-32,009,625   | 38        | 0.12         | 100                  |
| TNXB(NM_019105.6) Exon_43   | 6:32,009,686-32,009,721   | 36        | 0.21         | 100                  |
| TNXB(NM_019105.6) Exon_44   | 6:32,009,116-32,009,166   | 51        | 0.04         | 100                  |
| TNXB(NM_019105.6) Exon_44   | 6:32,009,218-32,009,237   | 20        | 0            | 100                  |
| TNXB(NM_019105.6) Exon_5    | 6:32,056,990-32,057,009   | 20        | 0            | 100                  |
| TNXB(NM_019105.6) Exon_5    | 6:32,057,147-32,057,166   | 20        | 0            | 100                  |
| TNXB(NM_019105.6) Exon_6    | 6:32,056,552-32,056,571   | 20        | 0            | 100                  |
| TNXB(NM_019105.6) Exon_6    | 6:32,056,816-32,056,835   | 20        | 0            | 100                  |
| TNXB(NM_019105.6) Exon_7    | 6:32,053,517-32,053,536   | 20        | 0            | 100                  |
| TNXB(NM_019105.6) Exon_7    | 6:32,053,649-32,053,692   | 44        | 1.78         | 23.39                |
| TNXB(NM_019105.6) Exon_7    | 6:32,053,886-32,053,905   | 20        | 0            | 100                  |
| TNXB(NM_019105.6) Exon_8    | 6:32,052,180-32,052,199   | 20        | 0            | 100                  |
| TNXB(NM_019105.6) Exon_8    | 6:32,052,477-32,052,496   | 20        | 0            | 100                  |
| TNXB(NM_019105.6) Exon_9    | 6:32,049,803-32,049,822   | 20        | 0            | 100                  |
| TNXB(NM_019105.6) Exon_9    | 6:32,050,094-32,050,113   | 20        | 0            | 100                  |
| TNXB(NM_032470.3) Exon_1    | 6:32,012,773-32,012,803   | 31        | 0.49         | 100                  |
| TNXB(NM_032470.3) Exon_1    | 6:32,012,990-32,013,006   | 17        | 2.19         | 95.1                 |
| TNXB(NM_032470.3) Exon_10   | 6:32,010,033-32,010,102   | 70        | 0.1          | 99.96                |
| TNXB(NM_032470.3) Exon_10   | 6:32,010,130-32,010,149   | 20        | 0            | 100                  |
| TNXB(NM_032470.3) Exon_11   | 6:32,009,779-32,009,798   | 20        | 0            | 100                  |
| TNXB(NM_032470.3) Exon_11   | 6:32,009,846-32,009,888   | 43        | 0.32         | 99.02                |
| TNXB(NM_032470.3) Exon_11   | 6:32,009,941-32,009,960   | 20        | 0            | 100                  |
| TNXB(NM_032470.3) Exon_12   | 6:32,009,538-32,009,557   | 20        | 0            | 100                  |
| TNXB(NM_032470.3) Exon_12   | 6:32,009,588-32,009,625   | 38        | 0.12         | 100                  |
| TNXB(NM_032470.3) Exon_12   | 6:32,009,686-32,009,721   | 36        | 0.21         | 100                  |
| TNXB(NM_032470.3) Exon_13   | 6:32,009,116-32,009,166   | 51        | 0.04         | 100                  |
| TNXB(NM_032470.3) Exon_13   | 6:32,009,218-32,009,237   | 20        | 0            | 100                  |
| TNXB(NM_032470.3) Exon_2    | 6:32,012,148-32,012,167   | 20        | 0            | 100                  |
| TNXB(NM_032470.3) Exon_2    | 6:32,012,212-32,012,262   | 51        | 0.13         | 100                  |
| TNXB(NM_032470.3) Exon_2    | 6:32,012,323-32,012,373   | 51        | 0.12         | 100                  |
| TNXB(NM_032470.3) Exon_2    | 6:32,012,433-32,012,473   | 41        | 0.15         | 100                  |
| TNXB(NM_032470.3) Exon_2    | 6:32,012,484-32,012,503   | 20        | 0            | 100                  |
| TNXB(NM_032470.3) Exon_3    | 6:32,011,774-32,011,793   | 20        | 0            | 100                  |
| TNXB(NM_032470.3) Exon_3    | 6:32,011,814-32,011,816   | 3         | 0.36         | 100                  |
| TNXB(NM_032470.3) Exon_3    | 6:32,011,875-32,011,916   | 42        | 0.15         | 82.41                |
| TNXB(NM_032470.3) Exon_4    | 6:32,011,516-32,011,535   | 20        | 0            | 100                  |
| TNXB(NM_032470.3) Exon_4    | 6:32,011,613-32,011,633   | 21        | 0.55         | 44.21                |
| TNXB(NM_032470.3) Exon_4    | 6:32,011,660-32,011,679   | 20        | 0            | 100                  |
| TNXB(NM_032470.3) Exon_5    | 6:32,011,204-32,011,245   | 42        | 0.02         | 100                  |
| TNXB(NM_032470.3) Exon_5    | 6:32,011,306-32,011,343   | 38        | 0.14         | 100                  |
| TNXB(NM_032470.3) Exon_6    | 6:32,010,942-32,010,961   | 20        | 0            | 100                  |
| TNXB(NM_032470.3) Exon_6    | 6:32,010,968-32,010,984   | 17        | 1.29         | 98.61                |
| TNXB(NM_032470.3) Exon_6    | 6:32,011,045-32,011,048   | 4         | 1.29         | 94.66                |
| TNXB(NM_032470.3) Exon_6    | 6:32,011,086-32,011,105   | 20        | 0            | 100                  |
| TNXB(NM_032470.3) Exon_7    | 6:32,010,718-32,010,836   | 119       | 0.11         | 78.31                |
| TNXB(NM_032470.3) Exon_7    | 6:32,010,849-32,010,868   | 20        | 0            | 100                  |
| TNXB(NM_032470.3) Exon_8    | 6:32,010,466-32,010,485   | 20        | 0            | 100                  |
| TNXB(NM_032470.3) Exon_8    | 6:32,010,510-32,010,553   | 44        | 2.04         | 93.09                |
| TNXB(NM_032470.3) Exon_8    | 6:32,010,599-32,010,618   | 20        | 0            | 100                  |
| TNXB(NM_032470.3) Exon_9    | 6:32,010,222-32,010,241   | 20        | 0            | 100                  |
| TNXB(NM_032470.3) Exon_9    | 6:32,010,374-32,010,393   | 20        | 0            | 100                  |
| VSX1(NM_001256271.1) Exon_1 | 20:25,062,399-25,062,460  | 62        | 1.06         | 36.34                |
| VSX1(NM_001256272.1) Exon_1 | 20:25,062,399-25,062,460  | 62        | 1.06         | 36.34                |
| VSX1(NM_014588.5) Exon_1    | 20:25,062,399-25,062,460  | 62        | 1.06         | 36.34                |
| VSX1(NM_199425.2) Exon_1    | 20:25,062,399-25,062,460  | 62        | 1.06         | 36.34                |
| WNT10A(NM_025216.2) Exon_1  | 2:219,745,787-219,745,840 | 54        | 0.77         | 35.06                |
| WNT10A(NM_025216.2) Exon_4  | 2:219,757,570-219,757,632 | 63        | 0.56         | 41.97                |
| WNT10A(NM_025216.2) Exon_4  | 2:219,757,653-219,757,755 | 103       | 1.69         | 93.73                |
| WNT10A(NM_025216.2) Exon_4  | 2:219,757,786-219,757,849 | 64        | 1.14         | 26.45                |
| WNT10A(NM_025216.2) Exon_4  | 2:219,757,888-219,757,952 | 65        | 1.22         | 25.92                |
| ZEB1(NM_001128128.2) Exon_7 | 10:31,810,548-31,810,585  | 38        | 5.65         | 49.39                |
| ZEB1(NM_001174093.1) Exon_1 | 10:31,608,154-31,608,231  | 78        | 0.43         | 100                  |
| ZEB1(NM_001174093.1) Exon_6 | 10:31,810,548-31,810,585  | 38        | 5.65         | 49.39                |
| ZEB1(NM_001174094.1) Exon_7 | 10:31,810,548-31,810,585  | 38        | 5.65         | 49.39                |
| ZEB1(NM_001174095.1) Exon_1 | 10:31,608,154-31,608,231  | 78        | 0.43         | 100                  |
| ZEB1(NM_001174095.1) Exon_6 | 10:31,810,548-31,810,585  | 38        | 5.65         | 49.39                |
| ZEB1(NM_001174096.1) Exon_1 | 10:31,608,154-31,608,231  | 78        | 0.43         | 100                  |

Continued on next page



| Gene(Transcript) Exon        | Region                   | Size (bp) | Avg.Coverage | Avg.%Samples.Failing |
|------------------------------|--------------------------|-----------|--------------|----------------------|
| ZEB1(NM_001174096.1) Exon_7  | 10:31,810,548-31,810,585 | 38        | 5.65         | 49.39                |
| ZEB1(NM_001323638.1) Exon_11 | 10:31,810,548-31,810,585 | 38        | 5.65         | 49.39                |
| ZEB1(NM_001323641.1) Exon_7  | 10:31,810,548-31,810,585 | 38        | 5.65         | 49.39                |
| ZEB1(NM_001323642.1) Exon_9  | 10:31,810,548-31,810,585 | 38        | 5.65         | 49.39                |
| ZEB1(NM_001323643.1) Exon_9  | 10:31,810,548-31,810,585 | 38        | 5.65         | 49.39                |
| ZEB1(NM_001323644.1) Exon_6  | 10:31,810,548-31,810,585 | 38        | 5.65         | 49.39                |
| ZEB1(NM_001323645.1) Exon_8  | 10:31,810,548-31,810,585 | 38        | 5.65         | 49.39                |
| ZEB1(NM_001323646.1) Exon_10 | 10:31,810,548-31,810,585 | 38        | 5.65         | 49.39                |
| ZEB1(NM_001323647.1) Exon_8  | 10:31,810,548-31,810,585 | 38        | 5.65         | 49.39                |
| ZEB1(NM_001323648.1) Exon_7  | 10:31,810,548-31,810,585 | 38        | 5.65         | 49.39                |
| ZEB1(NM_001323649.1) Exon_8  | 10:31,810,548-31,810,585 | 38        | 5.65         | 49.39                |
| ZEB1(NM_001323650.1) Exon_10 | 10:31,810,548-31,810,585 | 38        | 5.65         | 49.39                |
| ZEB1(NM_001323651.1) Exon_8  | 10:31,810,548-31,810,585 | 38        | 5.65         | 49.39                |
| ZEB1(NM_001323652.1) Exon_9  | 10:31,810,548-31,810,585 | 38        | 5.65         | 49.39                |
| ZEB1(NM_001323653.1) Exon_9  | 10:31,810,548-31,810,585 | 38        | 5.65         | 49.39                |
| ZEB1(NM_001323654.1) Exon_9  | 10:31,810,548-31,810,585 | 38        | 5.65         | 49.39                |
| ZEB1(NM_001323655.1) Exon_9  | 10:31,810,548-31,810,585 | 38        | 5.65         | 49.39                |
| ZEB1(NM_001323656.1) Exon_7  | 10:31,810,548-31,810,585 | 38        | 5.65         | 49.39                |
| ZEB1(NM_001323657.1) Exon_7  | 10:31,810,548-31,810,585 | 38        | 5.65         | 49.39                |
| ZEB1(NM_001323658.1) Exon_7  | 10:31,810,548-31,810,585 | 38        | 5.65         | 49.39                |
| ZEB1(NM_001323659.1) Exon_7  | 10:31,810,548-31,810,585 | 38        | 5.65         | 49.39                |
| ZEB1(NM_001323660.1) Exon_7  | 10:31,810,548-31,810,585 | 38        | 5.65         | 49.39                |
| ZEB1(NM_001323661.1) Exon_8  | 10:31,810,548-31,810,585 | 38        | 5.65         | 49.39                |
| ZEB1(NM_001323662.1) Exon_9  | 10:31,810,548-31,810,585 | 38        | 5.65         | 49.39                |
| ZEB1(NM_001323663.1) Exon_10 | 10:31,810,548-31,810,585 | 38        | 5.65         | 49.39                |
| ZEB1(NM_001323664.1) Exon_9  | 10:31,810,548-31,810,585 | 38        | 5.65         | 49.39                |
| ZEB1(NM_001323665.1) Exon_8  | 10:31,810,548-31,810,585 | 38        | 5.65         | 49.39                |
| ZEB1(NM_001323666.1) Exon_7  | 10:31,810,548-31,810,585 | 38        | 5.65         | 49.39                |
| ZEB1(NM_001323671.1) Exon_8  | 10:31,810,548-31,810,585 | 38        | 5.65         | 49.39                |
| ZEB1(NM_001323672.1) Exon_9  | 10:31,810,548-31,810,585 | 38        | 5.65         | 49.39                |
| ZEB1(NM_001323673.1) Exon_8  | 10:31,810,548-31,810,585 | 38        | 5.65         | 49.39                |
| ZEB1(NM_001323674.1) Exon_1  | 10:31,608,154-31,608,231 | 78        | 0.43         | 100                  |
| ZEB1(NM_001323674.1) Exon_5  | 10:31,810,548-31,810,585 | 38        | 5.65         | 49.39                |
| ZEB1(NM_001323675.1) Exon_1  | 10:31,610,755-31,610,790 | 36        | 0            | 100                  |
| ZEB1(NM_001323675.1) Exon_5  | 10:31,810,548-31,810,585 | 38        | 5.65         | 49.39                |
| ZEB1(NM_001323676.1) Exon_1  | 10:31,610,755-31,610,790 | 36        | 0            | 100                  |
| ZEB1(NM_001323676.1) Exon_7  | 10:31,810,548-31,810,585 | 38        | 5.65         | 49.39                |
| ZEB1(NM_001323677.1) Exon_1  | 10:31,610,755-31,610,790 | 36        | 0            | 100                  |
| ZEB1(NM_001323677.1) Exon_7  | 10:31,810,548-31,810,585 | 38        | 5.65         | 49.39                |
| ZEB1(NM_001323678.1) Exon_5  | 10:31,810,548-31,810,585 | 38        | 5.65         | 49.39                |
| ZEB1(NM_030751.5) Exon_1     | 10:31,608,154-31,608,231 | 78        | 0.43         | 100                  |
| ZEB1(NM_030751.5) Exon_7     | 10:31,810,548-31,810,585 | 38        | 5.65         | 49.39                |
| ZNF469(NM_001127464) Exon_1  | 16:88,493,859-88,493,868 | 10        | 0            | 100                  |
| ZNF469(NM_001127464) Exon_1  | 16:88,494,051-88,494,110 | 60        | 1.61         | 23.78                |
| ZNF469(NM_001127464) Exon_1  | 16:88,494,471-88,494,565 | 95        | 0.38         | 99.42                |
| ZNF469(NM_001127464) Exon_1  | 16:88,494,678-88,494,692 | 15        | 0.66         | 36.44                |
| ZNF469(NM_001127464) Exon_1  | 16:88,494,748-88,494,748 | 1         | 1.73         | 20.03                |
| ZNF469(NM_001127464) Exon_1  | 16:88,494,805-88,494,888 | 84        | 1.37         | 23.49                |
| ZNF469(NM_001127464) Exon_1  | 16:88,494,890-88,494,909 | 20        | 2            | 20.02                |
| ZNF469(NM_001127464) Exon_1  | 16:88,494,926-88,494,993 | 68        | 1.7          | 22.62                |
| ZNF469(NM_001127464) Exon_1  | 16:88,495,106-88,495,176 | 71        | 1.4          | 98.17                |
| ZNF469(NM_001127464) Exon_1  | 16:88,495,313-88,495,394 | 82        | 1.43         | 27.82                |
| ZNF469(NM_001127464) Exon_1  | 16:88,495,507-88,495,701 | 195       | 0.36         | 54.33                |
| ZNF469(NM_001127464) Exon_1  | 16:88,495,814-88,495,984 | 171       | 0.16         | 74.12                |
| ZNF469(NM_001127464) Exon_1  | 16:88,496,097-88,496,238 | 142       | 1.43         | 64.36                |
| ZNF469(NM_001127464) Exon_1  | 16:88,496,279-88,496,340 | 62        | 1.62         | 21.27                |
| ZNF469(NM_001127464) Exon_1  | 16:88,496,351-88,496,432 | 82        | 1.09         | 25.63                |
| ZNF469(NM_001127464) Exon_1  | 16:88,496,545-88,496,718 | 174       | 1.22         | 75.8                 |
| ZNF469(NM_001127464) Exon_1  | 16:88,496,831-88,496,996 | 166       | 1.12         | 58.75                |
| ZNF469(NM_001127464) Exon_1  | 16:88,497,011-88,497,140 | 130       | 0.79         | 33.37                |
| ZNF469(NM_001127464) Exon_1  | 16:88,497,253-88,497,267 | 15        | 1.68         | 22.51                |
| ZNF469(NM_001127464) Exon_1  | 16:88,497,404-88,497,490 | 87        | 1.03         | 47.66                |
| ZNF469(NM_001127464) Exon_1  | 16:88,497,515-88,497,570 | 56        | 1.39         | 23.98                |
| ZNF469(NM_001127464) Exon_1  | 16:88,497,834-88,497,916 | 83        | 1.25         | 27.43                |
| ZNF469(NM_001127464) Exon_1  | 16:88,498,029-88,498,057 | 29        | 1.11         | 33.49                |
| ZNF469(NM_001127464) Exon_1  | 16:88,498,242-88,498,321 | 80        | 0.54         | 36.71                |
| ZNF469(NM_001127464) Exon_1  | 16:88,498,564-88,498,565 | 2         | 1.28         | 23.69                |
| ZNF469(NM_001127464) Exon_1  | 16:88,498,678-88,498,786 | 109       | 2.93         | 84.76                |
| ZNF469(NM_001127464) Exon_1  | 16:88,499,042-88,499,095 | 54        | 1.16         | 21.61                |
| ZNF469(NM_001127464) Exon_1  | 16:88,499,210-88,499,240 | 31        | 1.67         | 23.07                |
| ZNF469(NM_001127464) Exon_1  | 16:88,499,485-88,499,502 | 18        | 1.57         | 22.33                |
| ZNF469(NM_001127464) Exon_1  | 16:88,499,547-88,499,608 | 62        | 1.04         | 24.13                |
| ZNF469(NM_001127464) Exon_1  | 16:88,500,015-88,500,167 | 153       | 0.63         | 39.71                |
| ZNF469(NM_001127464) Exon_1  | 16:88,500,681-88,500,729 | 49        | 1.02         | 29.8                 |
| ZNF469(NM_001127464) Exon_1  | 16:88,500,772-88,500,806 | 35        | 1.43         | 22.78                |
| ZNF469(NM_001127464) Exon_1  | 16:88,501,113-88,501,164 | 52        | 0.49         | 49.22                |
| ZNF469(NM_001127464) Exon_1  | 16:88,501,412-88,501,447 | 36        | 1.18         | 24.84                |
| ZNF469(NM_001127464) Exon_1  | 16:88,502,107-88,502,155 | 49        | 0.88         | 34.19                |
| ZNF469(NM_001127464) Exon_1  | 16:88,502,200-88,502,287 | 88        | 1.11         | 31.26                |
| ZNF469(NM_001127464) Exon_1  | 16:88,502,292-88,502,334 | 43        | 1.53         | 24.29                |
| ZNF469(NM_001127464) Exon_1  | 16:88,502,775-88,502,936 | 162       | 0.86         | 34.45                |
| ZNF469(NM_001127464) Exon_1  | 16:88,503,248-88,503,431 | 184       | 1.17         | 70.22                |
| ZNF469(NM_001127464) Exon_1  | 16:88,503,544-88,503,563 | 20        | 0.8          | 25.84                |
| ZNF469(NM_001127464) Exon_1  | 16:88,503,676-88,503,856 | 181       | 1.11         | 84.45                |
| ZNF469(NM_001127464) Exon_1  | 16:88,503,969-88,504,033 | 65        | 1.39         | 24.06                |
| ZNF469(NM_001127464) Exon_1  | 16:88,504,214-88,504,292 | 79        | 0.68         | 40.84                |
| ZNF469(NM_001127464) Exon_1  | 16:88,505,037-88,505,065 | 29        | 1.43         | 25.99                |
| ZNF469(NM_001127464) Exon_1  | 16:88,505,751-88,505,760 | 10        | 0            | 100                  |

Total number of failed regions : 439
